# Supplementary material for: Psychometric validation of the Ostomy Skin Tool 2.0
Source: PeerJ journal article supplement (doi:10.7717/peerj.16685), 2023-12-18
Supplement: CaseReportForm.pdf [file CaseReportForm.pdf]

Subject Case Report Forms

Production Germany 14. Jan. 2020 - Primary matrix

Signature Prompt: As investigator I certify that the information submitted within the application is true, complete, and accurate to the best of my knowledge.

**Production Germany 14. Jan. 2020: Primary matrix**  
**Form: Subject**  
**Generated On: 30 Sep 2020 12:31:31**

---

Investigator Name \_\_\_\_\_ ①

---

Site Number \_\_\_\_\_ ②

---

Subject Number \_\_\_\_\_ ③

---

**Production Germany 14. Jan. 2020: Primary matrix**  
**Form: Subject**  
**Generated On: 30 Sep 2020 12:31:31**

---

| Field Name | Data Type | Units | Values | Pre-Filled Values | Include Field OID |
|------------|-----------|-------|--------|-------------------|-------------------|
| ① INVNAM   | \$30      |       |        |                   | INVNAM            |
| ② SITE     | \$5       |       |        |                   | SITE              |
| ③ SUBJECT  | 4         |       |        |                   | SUBJECT           |

---

**Production Germany 14. Jan. 2020: Primary matrix**  
**Folder: Visit 0**  
**Form: Subject Informed Consent**  
**Generated On: 30 Sep 2020 12:31:31**

---

Please enter date of signed Informed Consent

\_\_\_\_\_ **1**

---

**Production Germany 14. Jan. 2020: Primary matrix**

**Folder: Visit 0**

**Form: Subject Informed Consent**

**Generated On: 30 Sep 2020 12:31:31**

---

| Field Name | Data Type      | Units | Values | Pre-Filled Values | Include Field OID |
|------------|----------------|-------|--------|-------------------|-------------------|
| ① ICDAT    | dd MMM<br>YYYY |       |        |                   | ICDAT             |

---

**Production Germany 14. Jan. 2020: Primary matrix**  
**Folder: Visit 0**  
**Form: Visit Date**  
**Generated On: 30 Sep 2020 12:31:31**

---

Please enter visit date

①

---

**Production Germany 14. Jan. 2020: Primary matrix**

**Folder: Visit 0**

**Form: Visit Date**

**Generated On: 30 Sep 2020 12:31:31**

---

| Field Name | Data Type      | Units | Values | Pre-Filled Values | Include Field OID |
|------------|----------------|-------|--------|-------------------|-------------------|
| ① VISITDAT | dd MMM<br>YYYY |       |        |                   | VISITDAT          |

---

**Production Germany 14. Jan. 2020: Primary matrix**

**Folder: Visit 0**

**Form: Inclusion Criteria**

**Generated On: 30 Sep 2020 12:31:31**

---

All fields on the Inclusion Criteria Form are required. The Subject must be able to answer 'Yes' to the following criteria:

---

Has given written consent to participate by signing the Informed Consent Signature Form

No  ②  
Yes

---

Has an ileostomy or colostomy with liquid output\*  
\*Definition of liquid output: Six-Seven in the Bristol scale  
(Appendix 5 - Bristol scale)

No  ③  
Yes

---

Currently using a flat product

No  ④  
Yes

---

Be at least 18 years of age and have full legal capacity

No  ⑤  
Yes

---

Have had their stoma for at least three months (90 days)

No  ⑥  
Yes

---

Can use a product with a max cut size of 40 mm

No  ⑦  
Yes

---

Has experienced leakage under the baseplate at least three times within the last fourteen days.  
Leakage defined as output seeping under the baseplate

No  ⑧  
Yes

---



**Production Germany 14. Jan. 2020: Primary matrix**

**Folder: Visit 0**

**Form: Inclusion Criteria**

**Generated On: 30 Sep 2020 12:31:31**

---

Has symptoms of peristomal skin complications or has peristomal skin complications defined by at least one of the below.

No  **9**  
Yes

a)=Has experienced symptoms of skin complications (itching, burning, pain) within the last fourteen days.

b)=Has experienced red skin in the inner circle (within three cm from stoma edge) within the last fourteen days.

c)=Has skin complication (assessed by Principal Investigator, or delegate) in the inner circle (within three cm from stoma edge) of the peristomal area.

---

Is able to handle the electronic diary (questionnaire/photo) themselves

No  **10**  
Yes

---

Is able to handle (apply, remove, cut etc.) the product themselves

No  **11**  
Yes

---

Is willing to not use barrier film or barrier cream during the investigation

No  **12**  
Yes

---

Is willing and suitable (determined by Principal Investigator, or delegate) to use a flat custom cut one-piece open or a two-piece open product during the investigation

No  **13**  
Yes

---

Is willing to change the product (1pc) or baseplate (2pc) at least every fourth days

No  **14**  
Yes

**Production Germany 14. Jan. 2020: Primary matrix**

**Folder: Visit 0**

**Form: Inclusion Criteria**

**Generated On: 30 Sep 2020 12:31:31**

| Field Name         | Data Type | Units | Values            | Pre-Filled Values | Include Field OID |
|--------------------|-----------|-------|-------------------|-------------------|-------------------|
| ② Inclusion no. 1  | 1         |       | 0 = No<br>1 = Yes |                   | ITEST1            |
| ③ Inclusion no. 2  | 1         |       | 0 = No<br>1 = Yes |                   | ITEST2            |
| ④ Inclusion no. 3  | 1         |       | 0 = No<br>1 = Yes |                   | ITEST3            |
| ⑤ Inclusion no. 4  | 1         |       | 0 = No<br>1 = Yes |                   | ITEST4            |
| ⑥ Inclusion no. 5  | 1         |       | 0 = No<br>1 = Yes |                   | ITEST5            |
| ⑦ Inclusion no. 6  | 1         |       | 0 = No<br>1 = Yes |                   | ITEST6            |
| ⑧ Inclusion no. 7  | 1         |       | 0 = No<br>1 = Yes |                   | ITEST7            |
| ⑨ Inclusion no. 8  | 1         |       | 0 = No<br>1 = Yes |                   | ITEST8            |
| ⑩ Inclusion no. 9  | 1         |       | 0 = No<br>1 = Yes |                   | ITEST9            |
| ⑪ Inclusion no. 10 | 1         |       | 0 = No<br>1 = Yes |                   | ITEST10           |

**Production Germany 14. Jan. 2020: Primary matrix**  
**Folder: Visit 0**  
**Form: Inclusion Criteria**  
**Generated On: 30 Sep 2020 12:31:31**

---

| Field Name                                                                                         | Data Type | Units | Values            | Pre-Filled Values | Include Field OID |
|----------------------------------------------------------------------------------------------------|-----------|-------|-------------------|-------------------|-------------------|
|  Inclusion no. 11 | 1         |       | 0 = No<br>1 = Yes |                   | ITEST11           |
|  Inclusion no. 12 | 1         |       | 0 = No<br>1 = Yes |                   | ITEST12           |
|  Inclusion no. 13 | 1         |       | 0 = No<br>1 = Yes |                   | ITEST13           |

---

**Production Germany 14. Jan. 2020: Primary matrix**

**Folder: Visit 0**

**Form: Exclusion criteria**

**Generated On: 30 Sep 2020 12:31:31**

---

All fields on the Exclusion Criteria Form are required. The Subject must be able to answer 'No' to the following criteria:

---

Is currently receiving or have within the past 60 days received radio-and/or chemotherapy  
- = low doses chemotherapy (assessed by Principal Investigator) is allowed for indications other than cancer

No  ②  
Yes

---

Is currently receiving or have within the past month received topical steroid treatment in the peristomal skin area, e.g. lotion or spray.  
- = Low dose systemic steroid treatment (e.g. inhalation) assessed by the Principal Investigator are allowed.  
- = Other systemic steroid treatment (e.g. injection, or tablet) are not allowed

No  ③  
Yes

---

Is breastfeeding

No  ④  
Yes   
Not applicable

---

Is pregnant (based on pregnancy test - urine)

No  ⑤  
Yes   
Not applicable

---

Has known hypersensitivity towards any of the products used in the investigation

No  ⑥  
Yes

---

**Production Germany 14. Jan. 2020: Primary matrix**

**Folder: Visit 0**

**Form: Exclusion criteria**

**Generated On: 30 Sep 2020 12:31:31**

---

| Field Name        | Data Type | Units | Values                                  | Pre-Filled Values | Include Field OID |
|-------------------|-----------|-------|-----------------------------------------|-------------------|-------------------|
| ② Exclusion no. 1 | 1         |       | 0 = No<br>1 = Yes                       |                   | ETEST1            |
| ③ Exclusion no. 2 | 1         |       | 0 = No<br>1 = Yes                       |                   | ETEST2            |
| ④ Exclusion no. 3 | 1         |       | 0 = No<br>1 = Yes<br>2 = Not applicable |                   | ETEST3            |
| ⑤ Exclusion no. 4 | 1         |       | 0 = No<br>1 = Yes<br>2 = Not applicable |                   | ETEST4            |
| ⑥ Exclusion no. 5 | 1         |       | 0 = No<br>1 = Yes                       |                   | ETEST5            |

---

**Production Germany 14. Jan. 2020: Primary matrix**  
**Folder: Randomisation**  
**Form: Randomisation Details**  
**Generated On: 30 Sep 2020 12:31:31**

---

Is the subject eligible for inclusion in the study?

No  ①  
Yes

---

Which product type does the subject use?

One piece product  ②  
Two piece product

---

Is the subject ready to be randomized?

\_\_\_\_\_ ③

---

Regime Name

\_\_\_\_\_ ④

---

Regime Ratio

\_\_\_\_\_ ⑤

---

Regime Description

\_\_\_\_\_ ⑥

---

Date and time of randomization  
(time in UTC)

\_\_\_\_\_ ⑦

---

Stratum Name

\_\_\_\_\_ ⑧

---

Blinded

\_\_\_\_\_ ⑨

---

Reason for Unblinding

\_\_\_\_\_ ⑩

---

Error Marking Group

\_\_\_\_\_ ⑪

---

**Production Germany 14. Jan. 2020: Primary matrix**

**Folder: Randomisation**

**Form: Randomisation Details**

**Generated On: 30 Sep 2020 12:31:31**

| Field Name                      | Data Type                  | Units | Values                                                     | Pre-Filled Values | Include Field OID      |
|---------------------------------|----------------------------|-------|------------------------------------------------------------|-------------------|------------------------|
| ① Eligibility                   | 1                          |       | 0 = No<br>1 = Yes                                          |                   | ELIGIBLE_Y<br>N        |
| ② PRODUCT_<br>TYPE              | 1                          |       | 1 = One<br>piece<br>product<br>2 = Two<br>piece<br>product |                   | PRODUCT_<br>TYPE       |
| ③ RANDTRIG                      | 1                          |       |                                                            |                   | RANDTRIG               |
| ④ REGIME_NA\$200<br>ME          |                            |       |                                                            |                   | REGIME_NA<br>ME        |
| ⑤ REGIME_RA 2<br>TIO            |                            |       |                                                            |                   | REGIME_RA<br>TIO       |
| ⑥ REGIME_DE \$1999<br>SCRIPTION |                            |       |                                                            |                   | REGIME_DE<br>SCRIPTION |
| ⑦ RANDOMIZ<br>ED_AT             | dd MMM<br>yyyy<br>HH:nn:ss |       |                                                            |                   | RANDOMIZ<br>ED_AT      |
| ⑧ STRATUM_<br>NAME              | \$50                       |       |                                                            |                   | STRATUM_<br>NAME       |
| ⑨ BLINDED                       | \$6                        |       |                                                            |                   | BLINDED                |

**Production Germany 14. Jan. 2020: Primary matrix**  
**Folder: Randomisation**  
**Form: Randomisation Details**  
**Generated On: 30 Sep 2020 12:31:31**

---

| Field Name                                                                                                         | Data Type | Units | Values | Pre-Filled Values | Include Field OID               |
|--------------------------------------------------------------------------------------------------------------------|-----------|-------|--------|-------------------|---------------------------------|
|  UNBLIND_R\$1999<br>EASON         |           |       |        |                   | UNBLIND_R<br>EASON              |
|  SYS_ERROR1<br>_MARKING_<br>GROUP |           |       | 1      |                   | SYS_ERROR<br>_MARKING_<br>GROUP |

---



**Production Germany 14. Jan. 2020: Primary matrix**  
**Folder: Visit 1**  
**Form: Visit Date**  
**Generated On: 30 Sep 2020 12:31:31**

---

Please enter visit date

①

---

**Production Germany 14. Jan. 2020: Primary matrix**

**Folder: Visit 1**

**Form: Visit Date**

**Generated On: 30 Sep 2020 12:31:31**

---

| Field Name | Data Type      | Units | Values | Pre-Filled Values | Include Field OID |
|------------|----------------|-------|--------|-------------------|-------------------|
| ① VISITDAT | dd MMM<br>YYYY |       |        |                   | VISITDAT          |

---

**Production Germany 14. Jan. 2020: Primary matrix**  
**Folder: Visit 1**  
**Form: Demographics**  
**Generated On: 30 Sep 2020 12:31:31**

---

Demographics

---

Date of birth \_\_\_\_\_ ②

---

Derived age \_\_\_\_\_ ③

---

Gender Female  ④  
Male

---

**Production Germany 14. Jan. 2020: Primary matrix**

**Folder: Visit 1**

**Form: Demographics**

**Generated On: 30 Sep 2020 12:31:31**

---

| Field Name      | Data Type      | Units | Values                 | Pre-Filled Values | Include Field OID |
|-----------------|----------------|-------|------------------------|-------------------|-------------------|
| ② Date of birth | dd MMM<br>YYYY |       |                        |                   | BRTHDAT           |
| ③ Derived age 2 |                |       |                        |                   | AGE               |
| ④ Gender        | 1              |       | 1 = Female<br>2 = Male |                   | GENDER            |

---

Production Germany 14. Jan. 2020: Primary matrix

Folder: Visit 1

Form: Vital signs

Generated On: 30 Sep 2020 12:31:31

---

Height and weight

---

Height (xxx)

cm    ②  
in

---

Weight (xxx)

kg    ③  
lb

---

**Production Germany 14. Jan. 2020: Primary matrix**

**Folder: Visit 1**

**Form: Vital signs**

**Generated On: 30 Sep 2020 12:31:31**

---

| Field Name | Data Type | Units              | Values | Pre-Filled Values | Include Field OID |
|------------|-----------|--------------------|--------|-------------------|-------------------|
| ② Height   | 3         | cm = cm<br>IN = in |        |                   | VSHT              |
| ③ Weight   | 3         | kg = kg<br>LB = lb |        |                   | VSWT              |

---

**Production Germany 14. Jan. 2020: Primary matrix**

**Folder: Visit 1**

**Form: Stoma**

**Generated On: 30 Sep 2020 12:31:31**

---

Information about the stoma

---

When was the stoma created / month; (if applicable; e.g Jan) \_\_\_\_\_ **2**

---

When was the stoma created / Year \_\_\_\_\_ **3**

---

Type of stoma Ileostomy  **4**  
Colostomy

---

What was the reason for creation of the stoma? (you may tick more than 1 box)

---

Morbus Crohn \_\_\_\_\_ **6**

---

Colitis Ulcerosa \_\_\_\_\_ **7**

---

Cancer \_\_\_\_\_ **8**

---

Other \_\_\_\_\_ **9**

---

What is the diameter of the stoma on the widest place? Fixed Unit: mm **10**

---

What is the height of the stoma? Fixed Unit: mm **11**

---

What is the shape of the stoma / intestine? Round  **12**  
Oval

---

**Production Germany 14. Jan. 2020: Primary matrix**

**Folder: Visit 1**

**Form: Stoma**

**Generated On: 30 Sep 2020 12:31:31**

---

Irregular

---



Production Germany 14. Jan. 2020: Primary matrix

Folder: Visit 1

Form: Stoma

Generated On: 30 Sep 2020 12:31:31

| Field Name               | Data Type | Units | Values                         | Pre-Filled Values | Include Field OID     |
|--------------------------|-----------|-------|--------------------------------|-------------------|-----------------------|
| ② Stoma operation month  | \$3       |       |                                |                   | STOMA_OP MONTH        |
| ③ Stoma operation - Year | 4         |       |                                |                   | STOMA_OP YEAR         |
| ④ Stoma type 1           |           |       | 1 = Ileostomy<br>2 = Colostomy |                   | STOMA_TY PE           |
| ⑥ Stoma reason 1         | 1         |       |                                |                   | MULTI_STO MAREASON _1 |
| ⑦ Stoma reason 2         | 1         |       |                                |                   | MULTI_STO MAREASON _2 |
| ⑧ Stoma reason 3         | 1         |       |                                |                   | MULTI_STO MAREASON _3 |
| ⑨ Stoma reason 4         | 1         |       |                                |                   | MULTI_STO MAREASON _4 |
| ⑩ Stoma diameter         | 2         |       |                                |                   | STOMA_DIA METER       |

**Production Germany 14. Jan. 2020: Primary matrix**

**Folder: Visit 1**

**Form: Stoma**

**Generated On: 30 Sep 2020 12:31:31**

---

| Field Name                                                                                     | Data Type | Units | Values                                    | Pre-Filled Values | Include Field OID |
|------------------------------------------------------------------------------------------------|-----------|-------|-------------------------------------------|-------------------|-------------------|
|  Stoma height | 2         |       |                                           |                   | STOMA_HEI<br>GHT  |
|  Stoma shape  | 1         |       | 1 = Round<br>2 = Oval<br>3 =<br>Irregular |                   | STOMA_SH<br>APE   |

---

**Production Germany 14. Jan. 2020: Primary matrix**

**Folder: Visit 1**

**Form: Output**

**Generated On: 30 Sep 2020 12:31:31**

---

Leakage / output

---

What is the frequency of the output?

All the time (continuous)  ②

With regular intervals

With irregular intervals

---

What is the consistency of the output evaluated on the Bristol scale?

Type 1  ③

Type 2

Type 3

Type 4

Type 5

Type 6

Type 7

---

Does the subject experience the bag becoming overfilled with air during use (ballooning)?

No  ④

Yes

---

**Production Germany 14. Jan. 2020: Primary matrix**

**Folder: Visit 1**

**Form: Output**

**Generated On: 30 Sep 2020 12:31:31**

---

| Field Name         | Data Type | Units | Values                                                                                         | Pre-Filled Values | Include Field OID |
|--------------------|-----------|-------|------------------------------------------------------------------------------------------------|-------------------|-------------------|
| ② Output frequency | 1         |       | 1 = All the time (continuous)<br>2 = With regular intervals<br>3 = With irregular intervals    |                   | OUTPUT_FR<br>Q    |
| ③ Bristol scale 1  |           |       | 1 = Type 1<br>2 = Type 2<br>3 = Type 3<br>4 = Type 4<br>5 = Type 5<br>6 = Type 6<br>7 = Type 7 |                   | BRISTOL_S<br>CALE |
| ④ Ballooning       | 1         |       | 0 = No<br>1 = Yes                                                                              |                   | BALLOONIN<br>G    |

---

**Production Germany 14. Jan. 2020: Primary matrix**

**Folder: Visit 1**

**Form: Normal device**

**Generated On: 30 Sep 2020 12:31:31**

---

Information about the stoma product normally used

---

What brand of stoma product is normally used? (you may tick more than 1 box)

---

Coloplast \_\_\_\_\_  3

---

ConvaTec \_\_\_\_\_  4

---

Hollister \_\_\_\_\_  5

---

Dansac \_\_\_\_\_  6

---

Salts \_\_\_\_\_  7

---

Other \_\_\_\_\_  8

---

If 'Other', please specify \_\_\_\_\_  9

---

What is the product name? \_\_\_\_\_  10

---

What is the product number / item number? \_\_\_\_\_  11

---

What is the product size (base plate size)? \_\_\_\_\_  12

---

Is the subject used to cutting the product / baseplate? No  13  
Yes

---

If Yes, how much is cut off - minimum value? Fixed Unit: mm  14

---

---

Production Germany 14. Jan. 2020: Primary matrix

Folder: Visit 1

Form: Normal device

Generated On: 30 Sep 2020 12:31:31

---

If Yes, how much is cut off - maximum value?

Fixed Unit: mm  15

---

On average, how often is the product/baseplate normally changed?

- Once a day or more frequent  16
- Every 2nd day
- Every 3rd day
- Every 4th day
- Every 5th day
- Every 6th day
- Once a week or less frequent
-

**Production Germany 14. Jan. 2020: Primary matrix**

**Folder: Visit 1**

**Form: Normal device**

**Generated On: 30 Sep 2020 12:31:31**

| Field Name       | Data Type | Units | Values | Pre-Filled Values | Include Field OID |
|------------------|-----------|-------|--------|-------------------|-------------------|
| ③ Brand 1        | 1         |       |        |                   | MULTI_BRAND_1     |
| ④ Brand 2        | 1         |       |        |                   | MULTI_BRAND_2     |
| ⑤ Brand 3        | 1         |       |        |                   | MULTI_BRAND_3     |
| ⑥ Brand 4        | 1         |       |        |                   | MULTI_BRAND_4     |
| ⑦ Brand 5        | 1         |       |        |                   | MULTI_BRAND_5     |
| ⑧ Brand 6        | 1         |       |        |                   | MULTI_BRAND_6     |
| ⑨ Brand other    | \$50      |       |        |                   | MULTI_BRAND_OTHER |
| ⑩ Product name   | \$100     |       |        |                   | PRODUCT_NAME      |
| ⑪ Product number | \$50      |       |        |                   | PRODUCT_NUMBER    |
| ⑫ Product size   | \$30      |       |        |                   | PRODUCT_SIZE      |

**Production Germany 14. Jan. 2020: Primary matrix**

**Folder: Visit 1**

**Form: Normal device**

**Generated On: 30 Sep 2020 12:31:31**

---

| Field Name                                                                                            | Data Type | Units | Values                                                                                                                                                                       | Pre-Filled Values | Include Field OID |
|-------------------------------------------------------------------------------------------------------|-----------|-------|------------------------------------------------------------------------------------------------------------------------------------------------------------------------------|-------------------|-------------------|
|  Cutting YN          | 1         |       | 0 = No<br>1 = Yes                                                                                                                                                            |                   | CUTTING_Y<br>N    |
|  Cutting min         | 2         |       |                                                                                                                                                                              |                   | CUTTING_M<br>IN   |
|  Cutting max2        |           |       |                                                                                                                                                                              |                   | CUTTING_M<br>AX   |
|  Frequency of change | 1         |       | 1 = Once a day or more frequent<br>2 = Every 2nd day<br>3 = Every 3rd day<br>4 = Every 4th day<br>5 = Every 5th day<br>6 = Every 6th day<br>7 = Once a week or less frequent |                   | CHANGE_F<br>REQ   |

---



**Production Germany 14. Jan. 2020: Primary matrix**

**Folder: Visit 1**

**Form: Accessories**

**Generated On: 30 Sep 2020 12:31:31**

---

Use of accessories

---

Which stoma accessories are normally used? (you may tick more than one box)

---

None \_\_\_\_\_ **3**

---

Adhesive remover \_\_\_\_\_ **4**

---

Paste \_\_\_\_\_ **5**

---

Rings \_\_\_\_\_ **6**

---

Ostomy tape \_\_\_\_\_ **7**

---

Ostomy belt \_\_\_\_\_ **8**

---

Hernia belt \_\_\_\_\_ **9**

---

Stoma powder \_\_\_\_\_ **10**

---

Barrier lotion \_\_\_\_\_ **11**

---

Barrier cream \_\_\_\_\_ **12**

---

Barrier spray \_\_\_\_\_ **13**

---

Barrier wipes \_\_\_\_\_ **14**

---

**Production Germany 14. Jan. 2020: Primary matrix**

**Folder: Visit 1**

**Form: Accessories**

**Generated On: 30 Sep 2020 12:31:31**

---

Cleansing wipes/cleansing spray \_\_\_\_\_ 15

---

Odour remover \_\_\_\_\_ 16

---

Other accessories \_\_\_\_\_ 17

---

If 'Other' please specify \_\_\_\_\_ 18

---

**Production Germany 14. Jan. 2020: Primary matrix**

**Folder: Visit 1**

**Form: Accessories**

**Generated On: 30 Sep 2020 12:31:31**

| Field Name            | Data Type | Units | Values | Pre-Filled Values | Include Field OID |
|-----------------------|-----------|-------|--------|-------------------|-------------------|
| ③ Accessories 1<br>1  |           |       |        |                   | MULTI_ACC<br>_1   |
| ④ Accessories 1<br>2  |           |       |        |                   | MULTI_ACC<br>_2   |
| ⑤ Accessories 1<br>3  |           |       |        |                   | MULTI_ACC<br>_3   |
| ⑥ Accessories 1<br>4  |           |       |        |                   | MULTI_ACC<br>_4   |
| ⑦ Accessories 1<br>5  |           |       |        |                   | MULTI_ACC<br>_5   |
| ⑧ Accessories 1<br>6  |           |       |        |                   | MULTI_ACC<br>_6   |
| ⑨ Accessories 1<br>7  |           |       |        |                   | MULTI_ACC<br>_7   |
| ⑩ Accessories 1<br>8  |           |       |        |                   | MULTI_ACC<br>_8   |
| ⑪ Accessories 1<br>9  |           |       |        |                   | MULTI_ACC<br>_9   |
| ⑫ Accessories 1<br>10 |           |       |        |                   | MULTI_ACC<br>_10  |

**Production Germany 14. Jan. 2020: Primary matrix**

**Folder: Visit 1**

**Form: Accessories**

**Generated On: 30 Sep 2020 12:31:31**

---

| Field Name                   | Data Type | Units | Values | Pre-Filled Values | Include Field OID   |
|------------------------------|-----------|-------|--------|-------------------|---------------------|
| 13 Accessories 1<br>11       |           |       |        |                   | MULTI_ACC<br>_11    |
| 14 Accessories 1<br>12       |           |       |        |                   | MULTI_ACC<br>_12    |
| 15 Accessories 1<br>13       |           |       |        |                   | MULTI_ACC<br>_13    |
| 16 Accessories 1<br>14       |           |       |        |                   | MULTI_ACC<br>_14    |
| 17 Accessories 1<br>15       |           |       |        |                   | MULTI_ACC<br>_15    |
| 18 Accessories \$50<br>other |           |       |        |                   | MULTI_ACC<br>_OTHER |

---

**Production Germany 14. Jan. 2020: Primary matrix**

**Folder: Visit 1**

**Form: Body Profile**

**Generated On: 30 Sep 2020 12:31:31**

---

Body Profile

---

Please refer to the Body Profile Guide in the Site File and describe the area that is usually covered by the base plate with regard to the following parameters

---

The form around the stoma (picture in box 1)

Regular  ③  
Inward   
Outward

---

Selected form being uniform or variable (picture in box 2)

Uniform  ④  
Variable

---

Soft or firm abdomen (pictures in box 3)

Soft  ⑤  
Firm

---

Superficial creases or deep folds (pictures in box 4)

No creases or superficial creases  ⑥  
Deep folds

---

Location of stoma (pictures in box 5)

Above bending line  ⑦  
At bending line   
Below bending line

---

Level of stoma opening in relation to skin surface (pictures in box 6)

Above skin surface  ⑧  
In level with skin surface   
Below skin surface

---

Consistency of output

Thick stool  ⑨

---

**Production Germany 14. Jan. 2020: Primary matrix**

**Folder: Visit 1**

**Form: Body Profile**

**Generated On: 30 Sep 2020 12:31:31**

---

Liquid stool

---

**Production Germany 14. Jan. 2020: Primary matrix**

**Folder: Visit 1**

**Form: Body Profile**

**Generated On: 30 Sep 2020 12:31:31**

| Field Name            | Data Type | Units | Values                                                                           | Pre-Filled Values | Include Field OID |
|-----------------------|-----------|-------|----------------------------------------------------------------------------------|-------------------|-------------------|
| ③ Body Profile 1<br>1 |           |       | 1 = Regular<br>2 = Inward<br>3 =<br>Outward                                      |                   | PROFILE_1         |
| ④ Body Profile 1<br>2 |           |       | 1 =<br>Uniform<br>2 =<br>Variable                                                |                   | PROFILE_2         |
| ⑤ Body Profile 1<br>3 |           |       | 1 = Soft<br>2 = Firm                                                             |                   | PROFILE_3         |
| ⑥ Body Profile 1<br>4 |           |       | 1 = No<br>creases or<br>superficial<br>creases<br>2 = Deep<br>folds              |                   | PROFILE_4         |
| ⑦ Body Profile 1<br>5 |           |       | 1 = Above<br>bending line<br>2 = At<br>bending line<br>3 = Below<br>bending line |                   | PROFILE_5         |
| ⑧ Body Profile 1<br>6 |           |       | 1 = Above<br>skin surface<br>2 = In level<br>with skin<br>surface                |                   | PROFILE_6         |

**Production Germany 14. Jan. 2020: Primary matrix**

**Folder: Visit 1**

**Form: Body Profile**

**Generated On: 30 Sep 2020 12:31:31**

---

| Field Name                                                                                            | Data Type | Units | Values                              | Pre-Filled Values | Include Field OID |
|-------------------------------------------------------------------------------------------------------|-----------|-------|-------------------------------------|-------------------|-------------------|
|                                                                                                       |           |       | 3 = Below skin surface              |                   |                   |
|  Body Profile 1<br>7 |           |       | 1 = Thick stool<br>2 = Liquid stool |                   | PROFILE_7         |

---



---

Peristomal skin area

Please ask the subject the following questions:

---

How often do you experience skin complications around the stoma (itching, burning, red or discoloured skin, pain, bleeding, moist or broken skin)?

- Daily  ②  
Every 2-3 days   
Every 4-6 days   
Once a week   
Every second week   
More rarely

---

How many times in the last year have you had a peristomal skin complication where you had to seek consultation and/or treatment from a health care professional? \_\_\_\_\_

③

---

Which peristomal skin complication/symptom do you experience most often? (you may tick more than one box)

Itching \_\_\_\_\_ ⑤

Burning \_\_\_\_\_ ⑥

Red/discoloured skin \_\_\_\_\_ ⑦

Pain \_\_\_\_\_ ⑧

Bleeding skin \_\_\_\_\_ ⑨

Moist skin \_\_\_\_\_ ⑩

Production Germany 14. Jan. 2020: Primary matrix

Folder: Visit 1

Form: Skin area visit 1

Generated On: 30 Sep 2020 12:31:31

---

Broken skin  **11**

---

Do you have any skin complications around your stoma today? No  **12**  
Yes

---

How would you describe the skin complications around your stoma today? No skin complications  **13**  
Very mild   
Mild   
Moderate   
Severe   
Very severe

---

Peristomal skin area

Please evaluate the peristomal skin - for site personnel to evaluate

---

Does the subject have any peristomal skin complications today? No  **15**  
Yes

---

Overall, how would you describe the severity of the subjects peristomal skin complications today? Very mild  **16**  
Mild   
Moderate   
Severe   
Very severe

---

Does the subject have any discoloration on the peristomal skin today? No  **17**  
Yes

---

**Production Germany 14. Jan. 2020: Primary matrix**

**Folder: Visit 1**

**Form: Skin area visit 1**

**Generated On: 30 Sep 2020 12:31:31**

---

Overall, how would you describe the severity of the subject's discoloration on their peristomal skin today?

- Very mild  18  
Mild   
Moderate   
Severe   
Very severe

---

Does the subject have any erosion on the peristomal skin today?

- No  19  
Yes

---

Overall, how would you describe the severity of the subject's erosion on their peristomal skin complications today?

- Very mild  20  
Mild   
Moderate   
Severe   
Very severe

---

Is there discoloration of peristomal skin with complications (pain, shiny, indurated, hot, itching, burning)?

- No  21  
Yes

---

Is there damage to the lower layers of the skin with complications (moisture, bleeding or ulceration)?

- No  22  
Yes

---

Is there raised tissue above skin level with complications (bleeding, pain or moisture)?

- No  23  
Yes

---

Please remember to check for adverse events, device deficiencies and concomitant medication

---

Production Germany 14. Jan. 2020: Primary matrix

Folder: Visit 1

Form: Skin area visit 1

Generated On: 30 Sep 2020 12:31:31

| Field Name                   | Data Type | Units | Values                                                                                                               | Pre-Filled Values | Include Field OID |
|------------------------------|-----------|-------|----------------------------------------------------------------------------------------------------------------------|-------------------|-------------------|
| ② Frequency of complications | 1         |       | 1 = Daily<br>2 = Every 2-3 days<br>3 = Every 4-6 days<br>4 = Once a week<br>5 = Every second week<br>6 = More rarely |                   | COMP_FRQ          |
| ③ Number of consultations    | \$5       |       |                                                                                                                      |                   | COMP_CONSULT      |
| ⑤ Skin complication 1        | 1         |       |                                                                                                                      |                   | MULTI_COMPTYPE_1  |
| ⑥ Skin complication 2        | 1         |       |                                                                                                                      |                   | MULTI_COMPTYPE_2  |
| ⑦ Skin complication 3        | 1         |       |                                                                                                                      |                   | MULTI_COMPTYPE_3  |
| ⑧ Skin complication 4        | 1         |       |                                                                                                                      |                   | MULTI_COMPTYPE_4  |

**Production Germany 14. Jan. 2020: Primary matrix**

**Folder: Visit 1**

**Form: Skin area visit 1**

**Generated On: 30 Sep 2020 12:31:31**

| Field Name                   | Data Type | Units | Values                                                                                                  | Pre-Filled Values | Include Field OID    |
|------------------------------|-----------|-------|---------------------------------------------------------------------------------------------------------|-------------------|----------------------|
| 9 Skin complication 5        | 1         |       |                                                                                                         |                   | MULTI_CO<br>MPTYPE_5 |
| 10 Skin complication 6       | 1         |       |                                                                                                         |                   | MULTI_CO<br>MPTYPE_6 |
| 11 Skin complication 7       | 1         |       |                                                                                                         |                   | MULTI_CO<br>MPTYPE_7 |
| 12 Complications today       | 1         |       | 0 = No<br>1 = Yes                                                                                       |                   | COMP_TOD<br>AY       |
| 13 Severity of complications | 1         |       | 0 = No skin complications<br>1 = Very mild<br>2 = Mild<br>3 = Moderate<br>4 = Severe<br>5 = Very severe |                   | COMP_IF_Y<br>ES      |
| 15 Skin complications        | 1         |       | 0 = No<br>1 = Yes                                                                                       |                   | COMPLICAT<br>ION_YN  |

Production Germany 14. Jan. 2020: Primary matrix

Folder: Visit 1

Form: Skin area visit 1

Generated On: 30 Sep 2020 12:31:31

| Field Name                     | Data Type | Units | Values                                                                     | Pre-Filled Values | Include Field OID   |
|--------------------------------|-----------|-------|----------------------------------------------------------------------------|-------------------|---------------------|
| 16 Skin complications severity | 1         |       | 1 = Very mild<br>2 = Mild<br>3 = Moderate<br>4 = Severe<br>5 = Very severe |                   | COMPLICATION_IF_YES |
| 17 Discolouration              | 1         |       | 0 = No<br>1 = Yes                                                          |                   | DISCOLOUR_YN        |
| 18 Discolouration severity     | 1         |       | 1 = Very mild<br>2 = Mild<br>3 = Moderate<br>4 = Severe<br>5 = Very severe |                   | DISCOLOUR_IF_YES    |
| 19 Erosion                     | 1         |       | 0 = No<br>1 = Yes                                                          |                   | EROSION_YN          |
| 20 Erosion severity            | 1         |       | 1 = Very mild<br>2 = Mild<br>3 = Moderate<br>4 = Severe<br>5 = Very severe |                   | EROSION_IF_YES      |

**Production Germany 14. Jan. 2020: Primary matrix**

**Folder: Visit 1**

**Form: Skin area visit 1**

**Generated On: 30 Sep 2020 12:31:31**

---

| Field Name                      | Data Type | Units | Values            | Pre-Filled Values | Include Field OID |
|---------------------------------|-----------|-------|-------------------|-------------------|-------------------|
| 21 Discolouration complications | 1         |       | 0 = No<br>1 = Yes |                   | DISCOLOUR_COMP_YN |
| 22 Erosion complications        | 1         |       | 0 = No<br>1 = Yes |                   | EROSION_COMP_YN   |
| 23 Tissue complications         | 1         |       | 0 = No<br>1 = Yes |                   | TISSUE_COMP_YN    |

---

**Production Germany 14. Jan. 2020: Primary matrix**

**Folder: Visit 1**

**Form: Study supplies visit 1**

**Generated On: 30 Sep 2020 12:31:31**

---

Administration of study supplies

Please register the supplies handed out to this subject at this visit

---

Please enter the name of the product handed out at this visit \_\_\_\_\_

②

---

Please enter the number of boxes handed out \_\_\_\_\_

③

---

Please enter the subject number from the phone that is handed out. PLEASE NOTE: it is extremely important that the subject number in Rave and on the phone is identical. Please also take the first photo at the visit. \_\_\_\_\_

④



**Production Germany 14. Jan. 2020: Primary matrix**

**Folder: Visit 1**

**Form: Study supplies visit 1**

**Generated On: 30 Sep 2020 12:31:31**

---

| Field Name         | Data Type | Units | Values | Pre-Filled Values | Include Field OID |
|--------------------|-----------|-------|--------|-------------------|-------------------|
| ② Product supplied | \$100     |       |        |                   | SUPPLIES_1        |
| ③ Boxes supplied   | 2         |       |        |                   | SUPPLIES_2        |
| ④ Phone supplied   | 4         |       |        |                   | SUPPLIES_3        |

---

**Production Germany 14. Jan. 2020: Primary matrix**  
**Folder: Phone call week 2**  
**Form: Phone call**  
**Generated On: 30 Sep 2020 12:31:31**

---

Registration of phone call

---

Date of the call \_\_\_\_\_

---

②

Please check the subject's well-being and make sure to ask the subject the following questions

---

Have you seen a change in the skin condition since the last visit/call?

No  ④  
Yes

---

If yes, please describe \_\_\_\_\_

---

⑤

Did the stoma behave differently from normal since the last visit/call?

No  ⑥  
Yes

---

If the stoma behaved differently, please describe \_\_\_\_\_

---

⑦

Please remember to check for adverse events, device deficiencies and concomitant medication

---

**Production Germany 14. Jan. 2020: Primary matrix**

**Folder: Phone call week 2**

**Form: Phone call**

**Generated On: 30 Sep 2020 12:31:31**

---

| Field Name                | Data Type      | Units | Values            | Pre-Filled Values | Include Field OID |
|---------------------------|----------------|-------|-------------------|-------------------|-------------------|
| ② Date of call            | dd MMM<br>YYYY |       |                   |                   | VISITDAT          |
| ④ Check of skin           | 1              |       | 0 = No<br>1 = Yes |                   | SKINCHECK         |
| ⑤ If yes, please describe | \$300          |       |                   |                   | SKINCHECK_IF_YES  |
| ⑥ Check of stoma          | 1              |       | 0 = No<br>1 = Yes |                   | STOMA_CHECK       |
| ⑦ If yes please describe  | \$300          |       |                   |                   | STOMACHECK_IF_YES |

---

**Production Germany 14. Jan. 2020: Primary matrix**  
**Folder: Phone call week 4**  
**Form: Phone call**  
**Generated On: 30 Sep 2020 12:31:31**

---

Registration of phone call

---

Date of the call \_\_\_\_\_

---

②

Please check the subject's well-being and make sure to ask the subject the following questions

---

Have you seen a change in the skin condition since the last visit/call?

No  ④  
Yes

---

If yes, please describe \_\_\_\_\_

---

⑤

Did the stoma behave differently from normal since the last visit/call?

No  ⑥  
Yes

---

If the stoma behaved differently, please describe \_\_\_\_\_

---

⑦

Please remember to check for adverse events, device deficiencies and concomitant medication

---

**Production Germany 14. Jan. 2020: Primary matrix**

**Folder: Phone call week 4**

**Form: Phone call**

**Generated On: 30 Sep 2020 12:31:31**

---

| Field Name                | Data Type      | Units | Values            | Pre-Filled Values | Include Field OID |
|---------------------------|----------------|-------|-------------------|-------------------|-------------------|
| ② Date of call            | dd MMM<br>YYYY |       |                   |                   | VISITDAT          |
| ④ Check of skin           | 1              |       | 0 = No<br>1 = Yes |                   | SKINCHECK         |
| ⑤ If yes, please describe | \$300          |       |                   |                   | SKINCHECK_IF_YES  |
| ⑥ Check of stoma          | 1              |       | 0 = No<br>1 = Yes |                   | STOMA_CHECK       |
| ⑦ If yes please describe  | \$300          |       |                   |                   | STOMACHECK_IF_YES |

---

**Production Germany 14. Jan. 2020: Primary matrix**  
**Folder: Visit 2**  
**Form: Visit Date**  
**Generated On: 30 Sep 2020 12:31:31**

---

Please enter visit date

①

---

**Production Germany 14. Jan. 2020: Primary matrix**

**Folder: Visit 2**

**Form: Visit Date**

**Generated On: 30 Sep 2020 12:31:31**

---

| Field Name | Data Type      | Units | Values | Pre-Filled Values | Include Field OID |
|------------|----------------|-------|--------|-------------------|-------------------|
| ① VISITDAT | dd MMM<br>YYYY |       |        |                   | VISITDAT          |

---

**Production Germany 14. Jan. 2020: Primary matrix**

**Folder: Visit 2**

**Form: Skin area visit 2**

**Generated On: 30 Sep 2020 12:31:31**

---

Peristomal skin area

Please evaluate the peristomal skin

---

Does the subject have any peristomal skin complications today?

No  ②  
Yes

---

Overall, how would you describe the severity of the subject's peristomal skin complications today?

Very mild  ③  
Mild   
Moderate   
Severe   
Very severe

---

Does the subject have any discoloration on the peristomal skin today?

No  ④  
Yes

---

Overall, how would you describe the severity of the subject's discoloration on their peristomal skin today?

Very mild  ⑤  
Mild   
Moderate   
Severe   
Very severe

---

Does the subject have any erosion on the peristomal skin today?

No  ⑥  
Yes

---

Overall, how would you describe the severity of the subject's erosion on their peristomal skin complications today?

Very mild  ⑦  
Mild   
Moderate   
Severe   
Very severe

---



**Production Germany 14. Jan. 2020: Primary matrix**

**Folder: Visit 2**

**Form: Skin area visit 2**

**Generated On: 30 Sep 2020 12:31:31**

---

Is there discoloration of peristomal skin with complications (pain, shiny, indurated, hot, itching, burning)?

No  **8**  
Yes

---

Is there damage to the lower layers of the skin with complications (moisture, bleeding or ulceration)?

No  **9**  
Yes

---

Is there raised tissue above skin level with complications (bleeding, pain or moisture)?

No  **10**  
Yes

---

Compared to the beginning of this test period (Test Period 1) how have the subject's peristomal skin complications changed during the study? (based on photo from visit 1 and the skin at visit 2)

Very much improved  **11**  
Much improved   
A little improved   
No change   
A little worse   
Much worse   
Very much worse

---

Compared to the beginning of this test period (test period 1) how has the discolouration of the subject's skin around the stoma changed during the study? (based on photo from visit 1 and the skin at visit 2)

Very much improved  **12**  
Much improved   
A little improved   
No change   
A little worse   
Much worse   
Very much worse

---

Compared to the beginning of this test period (test period 1) how has the erosion of the subject's skin around the stoma changed during the study? (based on photo from visit 1 and the skin at visit 2)

Very much improved  **13**  
Much improved   
A little improved

**Production Germany 14. Jan. 2020: Primary matrix**

**Folder: Visit 2**

**Form: Skin area visit 2**

**Generated On: 30 Sep 2020 12:31:31**

- 
- No change
  - A little worse
  - Much worse
  - Very much worse

---

Please remember to check for adverse events, device deficiencies and concomitant medication

---

**Production Germany 14. Jan. 2020: Primary matrix**

**Folder: Visit 2**

**Form: Skin area visit 2**

**Generated On: 30 Sep 2020 12:31:31**

| Field Name                    | Data Type | Units | Values                                                                     | Pre-Filled Values | Include Field OID           |
|-------------------------------|-----------|-------|----------------------------------------------------------------------------|-------------------|-----------------------------|
| ② Skin complications          | 1         |       | 0 = No<br>1 = Yes                                                          |                   | COMPLICAT<br>ION_YN         |
| ③ Skin complications severity | 1         |       | 1 = Very mild<br>2 = Mild<br>3 = Moderate<br>4 = Severe<br>5 = Very severe |                   | COMPLICAT<br>ION_IF_YE<br>S |
| ④ Discolouration              | 1         |       | 0 = No<br>1 = Yes                                                          |                   | DISCOLOUR<br>_YN            |
| ⑤ Discolouration severity     | 1         |       | 1 = Very mild<br>2 = Mild<br>3 = Moderate<br>4 = Severe<br>5 = Very severe |                   | DISCOLOUR<br>_IF_YES        |
| ⑥ Erosion                     | 1         |       | 0 = No<br>1 = Yes                                                          |                   | EROSION_Y<br>N              |
| ⑦ Erosion severity            | 1         |       | 1 = Very mild<br>2 = Mild<br>3 = Moderate                                  |                   | EROSION_I<br>F_YES          |

**Production Germany 14. Jan. 2020: Primary matrix**

**Folder: Visit 2**

**Form: Skin area visit 2**

**Generated On: 30 Sep 2020 12:31:31**

| Field Name                     | Data Type | Units | Values                                                                                                                                               | Pre-Filled Values | Include Field OID |
|--------------------------------|-----------|-------|------------------------------------------------------------------------------------------------------------------------------------------------------|-------------------|-------------------|
|                                |           |       | 4 = Severe<br>5 = Very severe                                                                                                                        |                   |                   |
| 8 Discolouration complications | 1         |       | 0 = No<br>1 = Yes                                                                                                                                    |                   | DISCOLOUR_COMP_YN |
| 9 Erosion complications        | 1         |       | 0 = No<br>1 = Yes                                                                                                                                    |                   | EROSION_COMP_YN   |
| 10 Tissue complications        | 1         |       | 0 = No<br>1 = Yes                                                                                                                                    |                   | TISSUE_COMP_YN    |
| 11 Comparison of skin          | 1         |       | 1 = Very much improved<br>2 = Much improved<br>3 = A little improved<br>4 = No change<br>5 = A little worse<br>6 = Much worse<br>7 = Very much worse |                   | COMPARE_SKIN      |

Production Germany 14. Jan. 2020: Primary matrix

Folder: Visit 2

Form: Skin area visit 2

Generated On: 30 Sep 2020 12:31:31

---

| Field Name                                                                                                       | Data Type | Units | Values                                                                                                                                               | Pre-Filled Values | Include Field OID |
|------------------------------------------------------------------------------------------------------------------|-----------|-------|------------------------------------------------------------------------------------------------------------------------------------------------------|-------------------|-------------------|
|  Comparison 1 of discolouration |           |       | 1 = Very much improved<br>2 = Much improved<br>3 = A little improved<br>4 = No change<br>5 = A little worse<br>6 = Much worse<br>7 = Very much worse |                   | COMPARE_DISCOLOUR |
|  Comparison 1 of erosion      |           |       | 1 = Very much improved<br>2 = Much improved<br>3 = A little improved<br>4 = No change<br>5 = A little worse<br>6 = Much worse<br>7 = Very much worse |                   | COMPARE_EROSION   |

---

**Production Germany 14. Jan. 2020: Primary matrix**  
**Folder: Visit 2**  
**Form: Study supplies visit 2**  
**Generated On: 30 Sep 2020 12:31:31**

---

Administration of study supplies  
Please register the supplies handed out to this subject at this visit

---

\_\_\_\_\_ ②

---

\_\_\_\_\_ ③

---

Please confirm that the phone has been configured, so the app is pushed forward to test period 2. Please also take the first photo at the visit.

No  ④  
Yes

---

**Production Germany 14. Jan. 2020: Primary matrix**

**Folder: Visit 2**

**Form: Study supplies visit 2**

**Generated On: 30 Sep 2020 12:31:31**

---

| Field Name         | Data Type | Units | Values            | Pre-Filled Values | Include Field OID |
|--------------------|-----------|-------|-------------------|-------------------|-------------------|
| ② Product supplied | \$100     |       |                   |                   | SUPPLIES_1        |
| ③ Boxes supplied   | 2         |       |                   |                   | SUPPLIES_2        |
| ④ Phone configured | 1         |       | 0 = No<br>1 = Yes |                   | SUPPLIES_4        |

---

**Production Germany 14. Jan. 2020: Primary matrix**  
**Folder: Phone call week 8**  
**Form: Phone call**  
**Generated On: 30 Sep 2020 12:31:31**

---

Registration of phone call

---

Date of the call \_\_\_\_\_

---

②

Please check the subject's well-being and make sure to ask the subject the following questions

---

Have you seen a change in the skin condition since the last visit/call?

No  ④  
Yes

---

If yes, please describe \_\_\_\_\_

---

⑤

Did the stoma behave differently from normal since the last visit/call?

No  ⑥  
Yes

---

If the stoma behaved differently, please describe \_\_\_\_\_

---

⑦

Please remember to check for adverse events, device deficiencies and concomitant medication

---



**Production Germany 14. Jan. 2020: Primary matrix**

**Folder: Phone call week 8**

**Form: Phone call**

**Generated On: 30 Sep 2020 12:31:31**

---

| Field Name                | Data Type      | Units | Values            | Pre-Filled Values | Include Field OID |
|---------------------------|----------------|-------|-------------------|-------------------|-------------------|
| ② Date of call            | dd MMM<br>YYYY |       |                   |                   | VISITDAT          |
| ④ Check of skin           | 1              |       | 0 = No<br>1 = Yes |                   | SKINCHECK         |
| ⑤ If yes, please describe | \$300          |       |                   |                   | SKINCHECK_IF_YES  |
| ⑥ Check of stoma          | 1              |       | 0 = No<br>1 = Yes |                   | STOMA_CHECK       |
| ⑦ If yes please describe  | \$300          |       |                   |                   | STOMACHECK_IF_YES |

---

**Production Germany 14. Jan. 2020: Primary matrix**  
**Folder: Phone call week 10**  
**Form: Phone call**  
**Generated On: 30 Sep 2020 12:31:31**

---

Registration of phone call

---

Date of the call \_\_\_\_\_

---

②

Please check the subject's well-being and make sure to ask the subject the following questions

---

Have you seen a change in the skin condition since the last visit/call?

No  ④  
Yes

---

If yes, please describe \_\_\_\_\_

---

⑤

Did the stoma behave differently from normal since the last visit/call?

No  ⑥  
Yes

---

If the stoma behaved differently, please describe \_\_\_\_\_

---

⑦

Please remember to check for adverse events, device deficiencies and concomitant medication

---

**Production Germany 14. Jan. 2020: Primary matrix**

**Folder: Phone call week 10**

**Form: Phone call**

**Generated On: 30 Sep 2020 12:31:31**

---

| Field Name                | Data Type      | Units | Values            | Pre-Filled Values | Include Field OID |
|---------------------------|----------------|-------|-------------------|-------------------|-------------------|
| ② Date of call            | dd MMM<br>YYYY |       |                   |                   | VISITDAT          |
| ④ Check of skin           | 1              |       | 0 = No<br>1 = Yes |                   | SKINCHECK         |
| ⑤ If yes, please describe | \$300          |       |                   |                   | SKINCHECK_IF_YES  |
| ⑥ Check of stoma          | 1              |       | 0 = No<br>1 = Yes |                   | STOMA_CHECK       |
| ⑦ If yes please describe  | \$300          |       |                   |                   | STOMACHECK_IF_YES |

---

**Production Germany 14. Jan. 2020: Primary matrix**  
**Folder: Visit 3**  
**Form: Visit Date**  
**Generated On: 30 Sep 2020 12:31:31**

---

Please enter visit date

①

---

**Production Germany 14. Jan. 2020: Primary matrix**

**Folder: Visit 3**

**Form: Visit Date**

**Generated On: 30 Sep 2020 12:31:31**

---

| Field Name | Data Type      | Units | Values | Pre-Filled Values | Include Field OID |
|------------|----------------|-------|--------|-------------------|-------------------|
| ① VISITDAT | dd MMM<br>YYYY |       |        |                   | VISITDAT          |

---

**Production Germany 14. Jan. 2020: Primary matrix**

**Folder: Visit 3**

**Form: Skin area visit 3**

**Generated On: 30 Sep 2020 12:31:31**

---

Peristomal skin area  
Please evaluate the peristomal skin

---

Does the subject have any peristomal skin complications today? No  **2**  
Yes

---

Overall, how would you describe the severity of the subjects peristomal skin complications today? Very mild  **3**  
Mild   
Moderate   
Severe   
Very severe

---

Does the subject have any discoloration on the peristomal skin today? No  **4**  
Yes

---

Overall, how would you describe the severity of the subject's discoloration on their peristomal skin today? Very mild  **5**  
Mild   
Moderate   
Severe   
Very severe

---

Does the subject have any erosion on the peristomal skin today? No  **6**  
Yes

---

Overall, how would you describe the severity of the subject's erosion on their peristomal skin complications today? Very mild  **7**  
Mild   
Moderate   
Severe   
Very severe

---

**Production Germany 14. Jan. 2020: Primary matrix**

**Folder: Visit 3**

**Form: Skin area visit 3**

**Generated On: 30 Sep 2020 12:31:31**

---

Is there discoloration of peristomal skin with complications (pain, shiny, indurated, hot, itching, burning)?

No  **8**  
Yes

---

Is there damage to the lower layers of the skin with complications (moisture, bleeding or ulceration)?

No  **9**  
Yes

---

Is there raised tissue above skin level with complications (bleeding, pain or moisture)?

No  **10**  
Yes

---

Compared to the beginning of this test period (Test Period 2) how have the subject's peristomal skin complications changed during the study? (based on photo from visit 2 and the skin at visit 3)

Very much improved  **11**  
Much improved   
A little improved   
No change   
A little worse   
Much worse   
Very much worse

---

Compared to the beginning of this test period (test period 2) how has the discolouration of the subject's skin around the stoma changed during the study? (based on photo from visit 2 and the skin at visit 3)

Very much improved  **12**  
Much improved   
A little improved   
No change   
A little worse   
Much worse   
Very much worse

---

Compared to the beginning of this test period (test period 2) how has the erosion of the subject's skin around the stoma changed during the study? (based on photo from visit 2 and the skin at visit 3)

Very much improved  **13**  
Much improved   
A little improved

**Production Germany 14. Jan. 2020: Primary matrix**

**Folder: Visit 3**

**Form: Skin area visit 3**

**Generated On: 30 Sep 2020 12:31:31**

---

No change

A little worse

Much worse

Very much worse

---

Please remember to check for adverse events, device deficiencies and concomitant medication

---



Production Germany 14. Jan. 2020: Primary matrix

Folder: Visit 3

Form: Skin area visit 3

Generated On: 30 Sep 2020 12:31:31

| Field Name                    | Data Type | Units | Values                                                                     | Pre-Filled Values | Include Field OID           |
|-------------------------------|-----------|-------|----------------------------------------------------------------------------|-------------------|-----------------------------|
| ② Skin complications          | 1         |       | 0 = No<br>1 = Yes                                                          |                   | COMPLICAT<br>ION_YN         |
| ③ Skin complications severity | 1         |       | 1 = Very mild<br>2 = Mild<br>3 = Moderate<br>4 = Severe<br>5 = Very severe |                   | COMPLICAT<br>ION_IF_YE<br>S |
| ④ Discolouration              | 1         |       | 0 = No<br>1 = Yes                                                          |                   | DISCOLOUR<br>_YN            |
| ⑤ Discolouration severity     | 1         |       | 1 = Very mild<br>2 = Mild<br>3 = Moderate<br>4 = Severe<br>5 = Very severe |                   | DISCOLOUR<br>_IF_YES        |
| ⑥ Erosion                     | 1         |       | 0 = No<br>1 = Yes                                                          |                   | EROSION_Y<br>N              |
| ⑦ Erosion severity            | 1         |       | 1 = Very mild<br>2 = Mild<br>3 = Moderate                                  |                   | EROSION_I<br>F_YES          |

**Production Germany 14. Jan. 2020: Primary matrix**

**Folder: Visit 3**

**Form: Skin area visit 3**

**Generated On: 30 Sep 2020 12:31:31**

| Field Name                     | Data Type | Units | Values                                                                                                                                               | Pre-Filled Values | Include Field OID |
|--------------------------------|-----------|-------|------------------------------------------------------------------------------------------------------------------------------------------------------|-------------------|-------------------|
|                                |           |       | 4 = Severe<br>5 = Very severe                                                                                                                        |                   |                   |
| 8 Discolouration complications | 1         |       | 0 = No<br>1 = Yes                                                                                                                                    |                   | DISCOLOUR_COMP_YN |
| 9 Erosion complications        | 1         |       | 0 = No<br>1 = Yes                                                                                                                                    |                   | EROSION_COMP_YN   |
| 10 Tissue complications        | 1         |       | 0 = No<br>1 = Yes                                                                                                                                    |                   | TISSUE_COMP_YN    |
| 11 Comparison of skin          | 1         |       | 1 = Very much improved<br>2 = Much improved<br>3 = A little improved<br>4 = No change<br>5 = A little worse<br>6 = Much worse<br>7 = Very much worse |                   | COMPARE_SKIN      |

Production Germany 14. Jan. 2020: Primary matrix

Folder: Visit 3

Form: Skin area visit 3

Generated On: 30 Sep 2020 12:31:31

---

| Field Name                                                                                                       | Data Type | Units | Values                                                                                                                                               | Pre-Filled Values | Include Field OID |
|------------------------------------------------------------------------------------------------------------------|-----------|-------|------------------------------------------------------------------------------------------------------------------------------------------------------|-------------------|-------------------|
|  Comparison 1 of discolouration |           |       | 1 = Very much improved<br>2 = Much improved<br>3 = A little improved<br>4 = No change<br>5 = A little worse<br>6 = Much worse<br>7 = Very much worse |                   | COMPARE_DISCOLOUR |
|  Comparison 1 of erosion      |           |       | 1 = Very much improved<br>2 = Much improved<br>3 = A little improved<br>4 = No change<br>5 = A little worse<br>6 = Much worse<br>7 = Very much worse |                   | COMPARE_EROSION   |

---

**Production Germany 14. Jan. 2020: Primary matrix**  
**Folder: Unscheduled call**  
**Form: Phone call**  
**Generated On: 30 Sep 2020 12:31:31**

---

Registration of phone call

---

Date of the call \_\_\_\_\_

②

Please check the subject's well-being and make sure to ask the subject the following questions

---

Have you seen a change in the skin condition since the last visit/call?

No  ④  
Yes

If yes, please describe \_\_\_\_\_

⑤

Did the stoma behave differently from normal since the last visit/call?

No  ⑥  
Yes

If the stoma behaved differently, please describe \_\_\_\_\_

⑦

Please remember to check for adverse events, device deficiencies and concomitant medication

---

**Production Germany 14. Jan. 2020: Primary matrix**

**Folder: Unscheduled call**

**Form: Phone call**

**Generated On: 30 Sep 2020 12:31:31**

---

| Field Name                | Data Type      | Units | Values            | Pre-Filled Values | Include Field OID |
|---------------------------|----------------|-------|-------------------|-------------------|-------------------|
| ② Date of call            | dd MMM<br>YYYY |       |                   |                   | VISITDAT          |
| ④ Check of skin           | 1              |       | 0 = No<br>1 = Yes |                   | SKINCHECK         |
| ⑤ If yes, please describe | \$300          |       |                   |                   | SKINCHECK_IF_YES  |
| ⑥ Check of stoma          | 1              |       | 0 = No<br>1 = Yes |                   | STOMA_CHECK       |
| ⑦ If yes please describe  | \$300          |       |                   |                   | STOMACHECK_IF_YES |

---

**Production Germany 14. Jan. 2020: Primary matrix**

**Folder: Deviations**

**Form: Deviation Form**

**Generated On: 30 Sep 2020 12:31:31**

---

Protocol Deviation Form

This form is used for deviations related to data. In case of several deviations, please fill in one form for each deviation

---

Please state the date the deviation took place \_\_\_\_\_ ②

---

Please state what the deviation is related to:

Informed consent  ③

Inclusion / exclusion criteria

Study procedures

Safety registrations

Randomisation

Other

---

If 'Other', please describe \_\_\_\_\_ ④

---

Please provide any supplementary description of the deviation if applicable \_\_\_\_\_ ⑤

---

Please describe any actions taken with regards to the deviation \_\_\_\_\_ ⑥

**Production Germany 14. Jan. 2020: Primary matrix**

**Folder: Deviations**

**Form: Deviation Form**

**Generated On: 30 Sep 2020 12:31:31**

| Field Name                 | Data Type      | Units | Values                                                                                                                                                                    | Pre-Filled Values | Include Field OID  |
|----------------------------|----------------|-------|---------------------------------------------------------------------------------------------------------------------------------------------------------------------------|-------------------|--------------------|
| ② Date                     | dd MMM<br>YYYY |       |                                                                                                                                                                           |                   | DATE               |
| ③ Type of deviation        | 2              |       | 1 =<br>Informed consent<br>2 =<br>Inclusion /<br>exclusion<br>criteria<br>3 = Study<br>procedures<br>4 = Safety<br>registration<br>s<br>5 =<br>Randomisation<br>6 = Other |                   | DEVIATION<br>_TYPE |
| ④ Other deviation type     | \$100          |       |                                                                                                                                                                           |                   | DEV_OTHE<br>R      |
| ⑤ Description of deviation | \$500          |       |                                                                                                                                                                           |                   | DEV_TERM           |
| ⑥ Action after deviation   | \$200          |       |                                                                                                                                                                           |                   | DEV_ACTIO<br>N     |

**Production Germany 14. Jan. 2020: Primary matrix**  
**Folder: Adverse event summary**  
**Form: Adverse/Serious Events Summary**  
**Generated On: 30 Sep 2020 12:31:31**

---

Did the subject experience any adverse events since last visit / call?

No  1  
Yes

---



**Production Germany 14. Jan. 2020: Primary matrix**  
**Folder: Adverse event summary**  
**Form: Adverse/Serious Events Summary**  
**Generated On: 30 Sep 2020 12:31:31**

---

| Field Name | Data Type | Units | Values            | Pre-Filled Values | Include Field OID |
|------------|-----------|-------|-------------------|-------------------|-------------------|
| ① AEYN     | 1         |       | 0 = No<br>1 = Yes |                   | AEYN              |

---

**Production Germany 14. Jan. 2020: Primary matrix**  
**Folder: Device deficiency summary**  
**Form: Device Deficiency Summary**  
**Generated On: 30 Sep 2020 12:31:31**

---

Did the subject experience any device deficiencies since  
last visit / call?

No  1  
Yes

---

**Production Germany 14. Jan. 2020: Primary matrix**  
**Folder: Device deficiency summary**  
**Form: Device Deficiency Summary**  
**Generated On: 30 Sep 2020 12:31:31**

---

| Field Name | Data Type | Units | Values            | Pre-Filled Values | Include Field OID |
|------------|-----------|-------|-------------------|-------------------|-------------------|
| ① DDYN     | 1         |       | 0 = No<br>1 = Yes |                   | DDYN              |

---

**Production Germany 14. Jan. 2020: Primary matrix**  
**Folder: Con medication summary**  
**Form: Concomitant Medication Summary**  
**Generated On: 30 Sep 2020 12:31:31**

---

Does the subject use any concomitant medication or did  
the subject change concomitant medications since last  
visit / call?

No  1  
Yes

---

**Production Germany 14. Jan. 2020: Primary matrix**  
**Folder: Con medication summary**  
**Form: Concomitant Medication Summary**  
**Generated On: 30 Sep 2020 12:31:31**

---

| Field Name | Data Type | Units | Values            | Pre-Filled Values | Include Field OID |
|------------|-----------|-------|-------------------|-------------------|-------------------|
| ① CMYN     | 1         |       | 0 = No<br>1 = Yes |                   | CMYN              |

---

**Production Germany 14. Jan. 2020: Primary matrix**  
**Folder: Termination**  
**Form: Termination Form**  
**Generated On: 30 Sep 2020 12:31:31**

---

Termination Form

---

Date of completion/discontinuation of the study: \_\_\_\_\_ ②

---

Did the subject complete the study as planned? No  ③  
Yes

---

Please select the primary reason for the discontinuation:

- Adverse Event  ④
- Device deficiency, which led to an Adverse Event
- Device deficiency, which DID NOT lead to an Adverse Event
- Lack of effectiveness
- Subject wishes to discontinue
- Protocol deviation
- Screening failure
- Withdrawal of Consent
- Lost to Follow-Up
- Other

---

If Protocol Deviation, please specify: \_\_\_\_\_ ⑤

---

If Other, please specify: \_\_\_\_\_ ⑥

---

**Production Germany 14. Jan. 2020: Primary matrix**

**Folder: Termination**

**Form: Termination Form**

**Generated On: 30 Sep 2020 12:31:31**

---

| Field Name | Data Type      | Units | Values                                                                                                                                                                                                                                                                                                                                                        | Pre-Filled Values | Include Field OID |
|------------|----------------|-------|---------------------------------------------------------------------------------------------------------------------------------------------------------------------------------------------------------------------------------------------------------------------------------------------------------------------------------------------------------------|-------------------|-------------------|
| ② DSSTDAT  | dd MMM<br>YYYY |       |                                                                                                                                                                                                                                                                                                                                                               |                   | DSSTDAT           |
| ③ DSDECOD  | 1              |       | 0 = No<br>1 = Yes                                                                                                                                                                                                                                                                                                                                             |                   | DSDECOD           |
| ④ DSTERM   | \$35           |       | 1 =<br>Adverse<br>Event<br>2 = Device<br>deficiency,<br>which led to<br>an Adverse<br>Event<br>3 = Device<br>deficiency,<br>which DID<br>NOT lead to<br>an Adverse<br>Event<br>4 = Lack of<br>effectivenes<br>s<br>5 = Subject<br>wishes to<br>discontinue<br>6 =<br>Protocol<br>deviation<br>9 =<br>Screening<br>failure<br>10 =<br>Withdrawal<br>of Consent |                   | DSTERM            |

---

**Production Germany 14. Jan. 2020: Primary matrix**  
**Folder: Termination**  
**Form: Termination Form**  
**Generated On: 30 Sep 2020 12:31:31**

| Field Name | Data Type | Units | Values                             | Pre-Filled Values | Include Field OID |
|------------|-----------|-------|------------------------------------|-------------------|-------------------|
|            |           |       | 7 = Lost to Follow-Up<br>8 = Other |                   |                   |
| ⑤ DSPD     | \$100     |       |                                    |                   | DSPD              |
| ⑥ DSOTH    | \$100     |       |                                    |                   | DSOTH             |



Production Germany 14. Jan. 2020: Primary matrix

Folder: Paper CRF data

Form: Paper Evaluation visit 1

Generated On: 30 Sep 2020 12:31:31

---

Do you have any skin complications around your stoma today?

No  ①  
Yes

---

If yes, how would you describe the skin complications around your stoma today?

No skin complications  ②  
Very mild   
Mild   
Moderate   
Severe   
Very severe

---

In the last seven days, due to leakage or worry about leakage...

③

---

I felt panic

All of the time  ④  
Often   
Sometimes   
Rarely or never

---

I felt stressed out

All of the time  ⑤  
Often   
Sometimes   
Rarely or never

---

I felt more afraid about leaks in the future

All of the time  ⑥  
Often   
Sometimes   
Rarely or never

---

I felt worry

All of the time  ⑦

Production Germany 14. Jan. 2020: Primary matrix

Folder: Paper CRF data

Form: Paper Evaluation visit 1

Generated On: 30 Sep 2020 12:31:31

---

Often   
Sometimes   
Rarely or never

---

I felt frustrated

All of the time  8  
Often   
Sometimes   
Rarely or never

---

I felt embarrassed

All of the time  9  
Often   
Sometimes   
Rarely or never

---

I felt worried that I might leak

All of the time  10  
Often   
Sometimes   
Rarely or never

---

I couldn't sleep

All of the time  11  
Often   
Sometimes   
Rarely or never

---

I kept waking up at night to check my stoma

All of the time  12  
Often   
Sometimes   
Rarely or never

---

I kept checking my ostomy bag to see if I have leaked

All of the time  13  
Often   
Sometimes   
Rarely or never

---

Usual and Social activities  
In the last seven days due to leakage or worry about leakage...

14

---

I decided to stay at home

All of the time  15  
Often   
Sometimes   
Rarely or never   
Not applicable

---

I couldn't do light activities

All of the time  16  
Often   
Sometimes   
Rarely or never   
Not applicable

---

I changed my plans

All of the time  17  
Often   
Sometimes   
Rarely or never   
Not applicable

---

I was unable to go out and meet family and friends

All of the time  18  
Often

---

Sometimes   
Rarely or never   
Not applicable

---

I avoided close physical contact with family and friends

All of the time  19  
Often   
Sometimes   
Rarely or never   
Not applicable

---

I did not want to see people

All of the time  20  
Often   
Sometimes   
Rarely or never   
Not applicable

---

I avoided people

All of the time  21  
Often   
Sometimes   
Rarely or never   
Not applicable

---

I tried to avoid meeting new people

All of the time  22  
Often   
Sometimes   
Rarely or never   
Not applicable

---

Production Germany 14. Jan. 2020: Primary matrix

Folder: Paper CRF data

Form: Paper Evaluation visit 1

Generated On: 30 Sep 2020 12:31:31

---

Coping and in control  
In the last 7 days, due to leakage or worry about  
leakage...

---

23

---

I felt in control

All of the time  24  
Often   
Sometimes   
Rarely or never

---

I was able to cope

All of the time  25  
Often   
Sometimes   
Rarely or never

---

I felt calm

All of the time  26  
Often   
Sometimes   
Rarely or never

---

I saw my friends as I usually do

All of the time  27  
Often   
Sometimes   
Rarely or never

---

Discreetness  
In the last seven days...

---

28

---

It was difficult to hide the stoma appliance under  
clothing

Strongly agree  29  
Slightly agree

---

Production Germany 14. Jan. 2020: Primary matrix

Folder: Paper CRF data

Form: Paper Evaluation visit 1

Generated On: 30 Sep 2020 12:31:31

---

Neither agree nor disagree   
Slightly disagree   
Strongly disagree

---

I was self-conscious about the appearance of the stoma appliance

Strongly agree  30  
Slightly agree   
Neither agree nor disagree   
Slightly disagree   
Strongly disagree

---

The stoma appliance limited the choice of clothes that I could wear

Strongly agree  31  
Slightly agree   
Neither agree nor disagree   
Slightly disagree   
Strongly disagree

---

The stoma appliance was obvious to other people

Strongly agree  32  
Slightly agree   
Neither agree nor disagree   
Slightly disagree   
Strongly disagree

---

The color of the stoma appliance was discreet

Strongly agree  33  
Slightly agree   
Neither agree nor disagree   
Slightly disagree   
Strongly disagree

---

Production Germany 14. Jan. 2020: Primary matrix

Folder: Paper CRF data

Form: Paper Evaluation visit 1

Generated On: 30 Sep 2020 12:31:31

---

It was difficult to hide the stoma appliance because of ballooning

Strongly agree  34  
Slightly agree   
Neither agree nor disagree   
Slightly disagree   
Strongly disagree

---

Comfort  
In the last seven days...

35

---

The stoma appliance was comfortable to wear

Strongly agree  36  
Slightly agree   
Neither agree nor disagree   
Slightly disagree   
Strongly disagree

---

I was not concerned about skin irritation under the stoma appliance (for example feelings of burning, itching, pinching or pain)

Strongly agree  37  
Slightly agree   
Neither agree nor disagree   
Slightly disagree   
Strongly disagree

---

It was uncomfortable to remove the stoma appliance from my body

Strongly agree  38  
Slightly agree   
Neither agree nor disagree   
Slightly disagree   
Strongly disagree

---

I often forgot that I was wearing the stoma appliance

Strongly agree  39  
Slightly agree

Production Germany 14. Jan. 2020: Primary matrix

Folder: Paper CRF data

Form: Paper Evaluation visit 1

Generated On: 30 Sep 2020 12:31:31

---

Neither agree nor disagree

Slightly disagree

Strongly disagree

---

The stoma appliance was comfortable as it fitted well to my body movements

Strongly agree  40

Slightly agree

Neither agree nor disagree

Slightly disagree

Strongly disagree

---

The stoma appliance disrupted my sleep during the night

Strongly agree  41

Slightly agree

Neither agree nor disagree

Slightly disagree

Strongly disagree

---

Confidence  
In the last seven days...

42

---

I was confident that the stoma appliance would not leak

Strongly agree  43

Slightly agree

Neither agree nor disagree

Slightly disagree

Strongly disagree

---

I worried that the stoma appliance would become loose from my body

Strongly agree  44

Slightly agree

Neither agree nor disagree

Slightly disagree



Strongly disagree

---

I felt confident that I could spend the night away from home despite wearing the stoma appliance

Strongly agree  45  
Slightly agree   
Neither agree nor disagree   
Slightly disagree   
Strongly disagree

---

I was confident the stoma appliance would not cause any problems for me

Strongly agree  46  
Slightly agree   
Neither agree nor disagree   
Slightly disagree   
Strongly disagree

---

I felt confident to take part in physical activities (for example, sports) whilst wearing the stoma appliance

Strongly agree  47  
Slightly agree   
Neither agree nor disagree   
Slightly disagree   
Strongly disagree

---

I worried that the stoma appliance would make a rustling noise

Strongly agree  48  
Slightly agree   
Neither agree nor disagree   
Slightly disagree   
Strongly disagree

---

Social life and relationships  
In the last seven days...

---

---

49

Production Germany 14. Jan. 2020: Primary matrix

Folder: Paper CRF data

Form: Paper Evaluation visit 1

Generated On: 30 Sep 2020 12:31:31

---

I worried that my family and friends felt awkward around me because of the stoma appliance

- Strongly agree  50
- Slightly agree
- Neither agree nor disagree
- Slightly disagree
- Strongly disagree
- 

I felt my social life had been restricted because of the stoma appliance

- Strongly agree  51
- Slightly agree
- Neither agree nor disagree
- Slightly disagree
- Strongly disagree
- 

I avoided close physical contact with family and friends because of the stoma appliance

- Strongly agree  52
- Slightly agree
- Neither agree nor disagree
- Slightly disagree
- Strongly disagree
- 

I worried about whether I could have a relationship because of my stoma appliance

- Strongly agree  53
- Slightly agree
- Neither agree nor disagree
- Slightly disagree
- Strongly disagree
- 

I worried about whether the stoma appliance would affect my sex life

- Strongly agree  54
- Slightly agree
- Neither agree nor disagree
- Slightly disagree
- Strongly disagree
-

**Production Germany 14. Jan. 2020: Primary matrix**

**Folder: Paper CRF data**

**Form: Paper Evaluation visit 1**

**Generated On: 30 Sep 2020 12:31:31**

| Field Name                  | Data Type | Units | Values                                                                                                  | Pre-Filled Values | Include Field OID |
|-----------------------------|-----------|-------|---------------------------------------------------------------------------------------------------------|-------------------|-------------------|
| ① Complications today       | 1         |       | 0 = No<br>1 = Yes                                                                                       |                   | COMP_TODAY        |
| ② Severity of complications | 1         |       | 0 = No skin complications<br>1 = Very mild<br>2 = Mild<br>3 = Moderate<br>4 = Severe<br>5 = Very severe |                   | COMP_IFYES        |
| ③ LEAKAGE_H1EADER           |           |       |                                                                                                         |                   | LEAKAGE_H1EADER   |
| ④ LEAKAGE_Q1S_1             |           |       | 0 = All of the time<br>1 = Often<br>2 = Sometimes<br>3 = Rarely or never                                |                   | LEAKAGE_Q1S_1     |
| ⑤ LEAKAGE_Q1S_2             |           |       | 0 = All of the time<br>1 = Often<br>2 = Sometimes<br>3 = Rarely or never                                |                   | LEAKAGE_Q1S_2     |

**Production Germany 14. Jan. 2020: Primary matrix**

**Folder: Paper CRF data**

**Form: Paper Evaluation visit 1**

**Generated On: 30 Sep 2020 12:31:31**

| Field Name          | Data Type | Units | Values                                                                   | Pre-Filled Values | Include Field OID |
|---------------------|-----------|-------|--------------------------------------------------------------------------|-------------------|-------------------|
| ⑥ LEAKAGE_Q1<br>S_3 |           |       | 0 = All of the time<br>1 = Often<br>2 = Sometimes<br>3 = Rarely or never |                   | LEAKAGE_Q<br>S_3  |
| ⑦ LEAKAGE_Q1<br>S_4 |           |       | 0 = All of the time<br>1 = Often<br>2 = Sometimes<br>3 = Rarely or never |                   | LEAKAGE_Q<br>S_4  |
| ⑧ LEAKAGE_Q1<br>S_5 |           |       | 0 = All of the time<br>1 = Often<br>2 = Sometimes<br>3 = Rarely or never |                   | LEAKAGE_Q<br>S_5  |
| ⑨ LEAKAGE_Q1<br>S_6 |           |       | 0 = All of the time<br>1 = Often<br>2 = Sometimes<br>3 = Rarely or never |                   | LEAKAGE_Q<br>S_6  |
| ⑩ LEAKAGE_Q1<br>S_7 |           |       | 0 = All of the time                                                      |                   | LEAKAGE_Q<br>S_7  |

**Production Germany 14. Jan. 2020: Primary matrix**

**Folder: Paper CRF data**

**Form: Paper Evaluation visit 1**

**Generated On: 30 Sep 2020 12:31:31**

| Field Name              | Data Type | Units | Values                                                                            | Pre-Filled Values | Include Field OID   |
|-------------------------|-----------|-------|-----------------------------------------------------------------------------------|-------------------|---------------------|
|                         |           |       | 1 = Often<br>2 =<br>Sometimes<br>3 = Rarely<br>or never                           |                   |                     |
| 11 LEAKAGE_Q1<br>S_8    |           |       | 0 = All of<br>the time<br>1 = Often<br>2 =<br>Sometimes<br>3 = Rarely<br>or never |                   | LEAKAGE_Q<br>S_8    |
| 12 LEAKAGE_Q1<br>S_9    |           |       | 0 = All of<br>the time<br>1 = Often<br>2 =<br>Sometimes<br>3 = Rarely<br>or never |                   | LEAKAGE_Q<br>S_9    |
| 13 LEAKAGE_Q1<br>S_10   |           |       | 0 = All of<br>the time<br>1 = Often<br>2 =<br>Sometimes<br>3 = Rarely<br>or never |                   | LEAKAGE_Q<br>S_10   |
| 14 LEAKAGE_H1<br>EADER2 |           |       |                                                                                   |                   | LEAKAGE_H<br>EADER2 |

**Production Germany 14. Jan. 2020: Primary matrix**

**Folder: Paper CRF data**

**Form: Paper Evaluation visit 1**

**Generated On: 30 Sep 2020 12:31:31**

| Field Name            | Data Type | Units | Values                                                                                         | Pre-Filled Values | Include Field OID |
|-----------------------|-----------|-------|------------------------------------------------------------------------------------------------|-------------------|-------------------|
| 15 LEAKAGE_Q1<br>S_11 |           |       | 0 = All of the time<br>1 = Often<br>2 = Sometimes<br>3 = Rarely or never<br>9 = Not applicable |                   | LEAKAGE_Q<br>S_11 |
| 16 LEAKAGE_Q1<br>S_12 |           |       | 0 = All of the time<br>1 = Often<br>2 = Sometimes<br>3 = Rarely or never<br>9 = Not applicable |                   | LEAKAGE_Q<br>S_12 |
| 17 LEAKAGE_Q1<br>S_13 |           |       | 0 = All of the time<br>1 = Often<br>2 = Sometimes<br>3 = Rarely or never<br>9 = Not applicable |                   | LEAKAGE_Q<br>S_13 |
| 18 LEAKAGE_Q1<br>S_14 |           |       | 0 = All of the time<br>1 = Often<br>2 = Sometimes                                              |                   | LEAKAGE_Q<br>S_14 |

Production Germany 14. Jan. 2020: Primary matrix

Folder: Paper CRF data

Form: Paper Evaluation visit 1

Generated On: 30 Sep 2020 12:31:31

| Field Name            | Data Type | Units | Values                                                                                         | Pre-Filled Values | Include Field OID |
|-----------------------|-----------|-------|------------------------------------------------------------------------------------------------|-------------------|-------------------|
|                       |           |       | 3 = Rarely or never<br>9 = Not applicable                                                      |                   |                   |
| 19 LEAKAGE_Q1<br>S_15 |           |       | 0 = All of the time<br>1 = Often<br>2 = Sometimes<br>3 = Rarely or never<br>9 = Not applicable |                   | LEAKAGE_Q<br>S_15 |
| 20 LEAKAGE_Q1<br>S_16 |           |       | 0 = All of the time<br>1 = Often<br>2 = Sometimes<br>3 = Rarely or never<br>9 = Not applicable |                   | LEAKAGE_Q<br>S_16 |
| 21 LEAKAGE_Q1<br>S_17 |           |       | 0 = All of the time<br>1 = Often<br>2 = Sometimes<br>3 = Rarely or never<br>9 = Not applicable |                   | LEAKAGE_Q<br>S_17 |

Production Germany 14. Jan. 2020: Primary matrix

Folder: Paper CRF data

Form: Paper Evaluation visit 1

Generated On: 30 Sep 2020 12:31:31

| Field Name              | Data Type | Units | Values                                                                                         | Pre-Filled Values | Include Field OID   |
|-------------------------|-----------|-------|------------------------------------------------------------------------------------------------|-------------------|---------------------|
| 22 LEAKAGE_Q1<br>S_18   |           |       | 0 = All of the time<br>1 = Often<br>2 = Sometimes<br>3 = Rarely or never<br>9 = Not applicable |                   | LEAKAGE_Q<br>S_18   |
| 23 LEAKAGE_H1<br>EADER3 |           |       |                                                                                                |                   | LEAKAGE_H<br>EADER3 |
| 24 LEAKAGE_Q1<br>S_19   |           |       | 0 = All of the time<br>1 = Often<br>2 = Sometimes<br>3 = Rarely or never                       |                   | LEAKAGE_Q<br>S_19   |
| 25 LEAKAGE_Q1<br>S_20   |           |       | 0 = All of the time<br>1 = Often<br>2 = Sometimes<br>3 = Rarely or never                       |                   | LEAKAGE_Q<br>S_20   |
| 26 LEAKAGE_Q1<br>S_21   |           |       | 0 = All of the time<br>1 = Often<br>2 = Sometimes                                              |                   | LEAKAGE_Q<br>S_21   |



**Production Germany 14. Jan. 2020: Primary matrix**  
**Folder: Paper CRF data**  
**Form: Paper Evaluation visit 1**  
**Generated On: 30 Sep 2020 12:31:31**

| Field Name            | Data Type | Units | Values                                                                                                                       | Pre-Filled Values | Include Field OID |
|-----------------------|-----------|-------|------------------------------------------------------------------------------------------------------------------------------|-------------------|-------------------|
|                       |           |       | 3 = Rarely or never                                                                                                          |                   |                   |
| 27 LEAKAGE_Q1<br>S_22 |           |       | 0 = All of the time<br>1 = Often<br>2 = Sometimes<br>3 = Rarely or never                                                     |                   | LEAKAGE_Q<br>S_22 |
| 28 QOLH1              | 1         |       |                                                                                                                              |                   | QOLH1             |
| 29 QOL_QS_1           | 1         |       | 1 = Strongly agree<br>2 = Slightly agree<br>3 = Neither agree nor disagree<br>4 = Slightly disagree<br>5 = Strongly disagree |                   | QOL_QS_1          |
| 30 QOL_QS_2           | 1         |       | 1 = Strongly agree<br>2 = Slightly agree                                                                                     |                   | QOL_QS_2          |

Production Germany 14. Jan. 2020: Primary matrix

Folder: Paper CRF data

Form: Paper Evaluation visit 1

Generated On: 30 Sep 2020 12:31:31

| Field Name  | Data Type | Units | Values                                                                                                                       | Pre-Filled Values | Include Field OID |
|-------------|-----------|-------|------------------------------------------------------------------------------------------------------------------------------|-------------------|-------------------|
|             |           |       | 3 = Neither agree nor disagree<br>4 = Slightly disagree<br>5 = Strongly disagree                                             |                   |                   |
| 31 QOL_QS_3 | 1         |       | 1 = Strongly agree<br>2 = Slightly agree<br>3 = Neither agree nor disagree<br>4 = Slightly disagree<br>5 = Strongly disagree |                   | QOL_QS_3          |
| 32 QOL_QS_4 | 1         |       | 1 = Strongly agree<br>2 = Slightly agree<br>3 = Neither agree nor disagree<br>4 = Slightly disagree<br>5 = Strongly disagree |                   | QOL_QS_4          |

**Production Germany 14. Jan. 2020: Primary matrix**  
**Folder: Paper CRF data**  
**Form: Paper Evaluation visit 1**  
**Generated On: 30 Sep 2020 12:31:31**

| Field Name  | Data Type | Units | Values                                                                                                                       | Pre-Filled Values | Include Field OID |
|-------------|-----------|-------|------------------------------------------------------------------------------------------------------------------------------|-------------------|-------------------|
| 33 QOL_QS_5 | 1         |       | 1 = Strongly agree<br>2 = Slightly agree<br>3 = Neither agree nor disagree<br>4 = Slightly disagree<br>5 = Strongly disagree |                   | QOL_QS_5          |
| 34 QOL_QS_6 | 1         |       | 1 = Strongly agree<br>2 = Slightly agree<br>3 = Neither agree nor disagree<br>4 = Slightly disagree<br>5 = Strongly disagree |                   | QOL_QS_6          |
| 35 QOLH2    | 1         |       |                                                                                                                              |                   | QOLH2             |
| 36 QOL_QS_7 | 1         |       | 1 = Strongly agree                                                                                                           |                   | QOL_QS_7          |

Production Germany 14. Jan. 2020: Primary matrix

Folder: Paper CRF data

Form: Paper Evaluation visit 1

Generated On: 30 Sep 2020 12:31:31

| Field Name  | Data Type | Units | Values                                                                                                                       | Pre-Filled Values | Include Field OID |
|-------------|-----------|-------|------------------------------------------------------------------------------------------------------------------------------|-------------------|-------------------|
|             |           |       | 2 = Slightly agree<br>3 = Neither agree nor disagree<br>4 = Slightly disagree<br>5 = Strongly disagree                       |                   |                   |
| 37 QOL_QS_8 | 1         |       | 1 = Strongly agree<br>2 = Slightly agree<br>3 = Neither agree nor disagree<br>4 = Slightly disagree<br>5 = Strongly disagree |                   | QOL_QS_8          |
| 38 QOL_QS_9 | 1         |       | 1 = Strongly agree<br>2 = Slightly agree<br>3 = Neither agree nor disagree<br>4 = Slightly disagree                          |                   | QOL_QS_9          |

Production Germany 14. Jan. 2020: Primary matrix

Folder: Paper CRF data

Form: Paper Evaluation visit 1

Generated On: 30 Sep 2020 12:31:31

| Field Name    | Data Type | Units | Values                                                                                                                             | Pre-Filled Values | Include Field OID |
|---------------|-----------|-------|------------------------------------------------------------------------------------------------------------------------------------|-------------------|-------------------|
|               |           |       | 5 =<br>Strongly disagree                                                                                                           |                   |                   |
| 39 QOL_QS_101 |           |       | 1 =<br>Strongly agree<br>2 = Slightly agree<br>3 = Neither agree nor disagree<br>4 = Slightly disagree<br>5 =<br>Strongly disagree |                   | QOL_QS_10         |
| 40 QOL_QS_111 |           |       | 1 =<br>Strongly agree<br>2 = Slightly agree<br>3 = Neither agree nor disagree<br>4 = Slightly disagree<br>5 =<br>Strongly disagree |                   | QOL_QS_11         |

Production Germany 14. Jan. 2020: Primary matrix

Folder: Paper CRF data

Form: Paper Evaluation visit 1

Generated On: 30 Sep 2020 12:31:31

| Field Name    | Data Type | Units | Values                                                                                                                       | Pre-Filled Values | Include Field OID |
|---------------|-----------|-------|------------------------------------------------------------------------------------------------------------------------------|-------------------|-------------------|
| 41 QOL_QS_121 |           |       | 1 = Strongly agree<br>2 = Slightly agree<br>3 = Neither agree nor disagree<br>4 = Slightly disagree<br>5 = Strongly disagree |                   | QOL_QS_12         |
| 42 QOLH3      | 1         |       |                                                                                                                              |                   | QOLH3             |
| 43 QOL_QS_131 |           |       | 1 = Strongly agree<br>2 = Slightly agree<br>3 = Neither agree nor disagree<br>4 = Slightly disagree<br>5 = Strongly disagree |                   | QOL_QS_13         |
| 44 QOL_QS_141 |           |       | 1 = Strongly agree                                                                                                           |                   | QOL_QS_14         |

Production Germany 14. Jan. 2020: Primary matrix

Folder: Paper CRF data

Form: Paper Evaluation visit 1

Generated On: 30 Sep 2020 12:31:31

| Field Name    | Data Type | Units | Values                                                                                                                       | Pre-Filled Values | Include Field OID |
|---------------|-----------|-------|------------------------------------------------------------------------------------------------------------------------------|-------------------|-------------------|
|               |           |       | 2 = Slightly agree<br>3 = Neither agree nor disagree<br>4 = Slightly disagree<br>5 = Strongly disagree                       |                   |                   |
| 45 QOL_QS_151 |           |       | 1 = Strongly agree<br>2 = Slightly agree<br>3 = Neither agree nor disagree<br>4 = Slightly disagree<br>5 = Strongly disagree |                   | QOL_QS_15         |
| 46 QOL_QS_161 |           |       | 1 = Strongly agree<br>2 = Slightly agree<br>3 = Neither agree nor disagree<br>4 = Slightly disagree                          |                   | QOL_QS_16         |

Production Germany 14. Jan. 2020: Primary matrix

Folder: Paper CRF data

Form: Paper Evaluation visit 1

Generated On: 30 Sep 2020 12:31:31

| Field Name    | Data Type | Units | Values                                                                                                                             | Pre-Filled Values | Include Field OID |
|---------------|-----------|-------|------------------------------------------------------------------------------------------------------------------------------------|-------------------|-------------------|
|               |           |       | 5 =<br>Strongly disagree                                                                                                           |                   |                   |
| 47 QOL_QS_171 |           |       | 1 =<br>Strongly agree<br>2 = Slightly agree<br>3 = Neither agree nor disagree<br>4 = Slightly disagree<br>5 =<br>Strongly disagree |                   | QOL_QS_17         |
| 48 QOL_QS_181 |           |       | 1 =<br>Strongly agree<br>2 = Slightly agree<br>3 = Neither agree nor disagree<br>4 = Slightly disagree<br>5 =<br>Strongly disagree |                   | QOL_QS_18         |
| 49 QOLH4      | 1         |       |                                                                                                                                    |                   | QOLH4             |



**Production Germany 14. Jan. 2020: Primary matrix**

**Folder: Paper CRF data**

**Form: Paper Evaluation visit 1**

**Generated On: 30 Sep 2020 12:31:31**

---

| Field Name    | Data Type | Units | Values                                                                                                                       | Pre-Filled Values | Include Field OID |
|---------------|-----------|-------|------------------------------------------------------------------------------------------------------------------------------|-------------------|-------------------|
| 50 QOL_QS_191 |           |       | 1 = Strongly agree<br>2 = Slightly agree<br>3 = Neither agree nor disagree<br>4 = Slightly disagree<br>5 = Strongly disagree |                   | QOL_QS_19         |
| 51 QOL_QS_201 |           |       | 1 = Strongly agree<br>2 = Slightly agree<br>3 = Neither agree nor disagree<br>4 = Slightly disagree<br>5 = Strongly disagree |                   | QOL_QS_20         |
| 52 QOL_QS_211 |           |       | 1 = Strongly agree<br>2 = Slightly agree<br>3 = Neither agree nor disagree                                                   |                   | QOL_QS_21         |

---

Production Germany 14. Jan. 2020: Primary matrix

Folder: Paper CRF data

Form: Paper Evaluation visit 1

Generated On: 30 Sep 2020 12:31:31

| Field Name                                                                                     | Data Type | Units | Values                                                                                                                       | Pre-Filled Values | Include Field OID |
|------------------------------------------------------------------------------------------------|-----------|-------|------------------------------------------------------------------------------------------------------------------------------|-------------------|-------------------|
|                                                                                                |           |       | 4 = Slightly disagree<br>5 = Strongly disagree                                                                               |                   |                   |
|  QOL_QS_221   |           |       | 1 = Strongly agree<br>2 = Slightly agree<br>3 = Neither agree nor disagree<br>4 = Slightly disagree<br>5 = Strongly disagree |                   | QOL_QS_22         |
|  QOL_QS_231 |           |       | 1 = Strongly agree<br>2 = Slightly agree<br>3 = Neither agree nor disagree<br>4 = Slightly disagree<br>5 = Strongly disagree |                   | QOL_QS_23         |

**Production Germany 14. Jan. 2020: Primary matrix**  
**Folder: Product change TP1**  
**Form: Type of change**  
**Generated On: 30 Sep 2020 12:31:31**

---

Product sequence number \_\_\_\_\_ ①

---

What type of change do you want to register? Bag change  ②  
Baseplate change

---

\_\_\_\_\_ ③

---

**Production Germany 14. Jan. 2020: Primary matrix**

**Folder: Product change TP1**

**Form: Type of change**

**Generated On: 30 Sep 2020 12:31:31**

| Field Name                | Data Type | Units | Values                                                                                             | Pre-Filled Values                                                                                     | Include Field OID |
|---------------------------|-----------|-------|----------------------------------------------------------------------------------------------------|-------------------------------------------------------------------------------------------------------|-------------------|
| ① Product sequence number | 3         |       |                                                                                                    |                                                                                                       | PRODSEQUENCE      |
| ② Type of change          | \$3       |       | BAG = Bag change<br>BP = Baseplate change                                                          |                                                                                                       | CNG_TYPE          |
| ③ HIDDEN                  | \$100     |       | {<br>"Change_ty<br>pe": {<br>"BAG":<br>"CHANGETI<br>ME_BP",<br>"BP":<br>"CHANGETI<br>ME_BP" }<br>} | 1: {<br>"Change_ty<br>pe": {<br>"BAG":<br>"CHANGETI<br>ME_BP",<br>"BP":<br>"CHANGETI<br>ME_BP" }<br>} | HIDDEN            |

**Production Germany 14. Jan. 2020: Primary matrix**  
**Folder: Product change TP1**  
**Form: Time for performing change of bag**  
**Generated On: 30 Sep 2020 12:31:31**

---

Product sequence number \_\_\_\_\_

---

①

Are you going to change now or have you changed  
previously without using the app?

I am going to change now  ②

I have changed previously   
without using the app (e.g.  
during the night)

---

{ "CNGnowprev": { "N": ③  
"BAGCNG", "P":  
"BAGCNGPREV" } }

---

**Production Germany 14. Jan. 2020: Primary matrix**

**Folder: Product change TP1**

**Form: Time for performing change of bag**

**Generated On: 30 Sep 2020 12:31:31**

---

| Field Name                          | Data Type | Units | Values                                                                                                      | Pre-Filled Values | Include Field OID |
|-------------------------------------|-----------|-------|-------------------------------------------------------------------------------------------------------------|-------------------|-------------------|
| ① Product sequence number           | 3         |       |                                                                                                             |                   | PRODSEQUENCE      |
| ② Time for performing change of bag | \$1       |       | N = I am going to change now<br>P = I have changed previously without using the app (e.g. during the night) |                   | CHANGETIME_BAG    |
| ③ HIDDEN                            | \$100     |       | {<br>"CNGnowpr<br>ev": {<br>"N":<br>"BAGCNG",<br>"P":<br>"BAGCNGPR<br>EV" } }                               |                   | HIDDEN            |

---

**Production Germany 14. Jan. 2020: Primary matrix**  
**Folder: Product change TP1**  
**Form: Bag change previously**  
**Generated On: 30 Sep 2020 12:31:31**

---

Product sequence number

①

---

When did you change the bag (approximately)?

②

**Production Germany 14. Jan. 2020: Primary matrix**  
**Folder: Product change TP1**  
**Form: Bag change previously**  
**Generated On: 30 Sep 2020 12:31:31**

|   | Field Name                  | Data Type         | Units | Values | Pre-Filled Values | Include Field OID |
|---|-----------------------------|-------------------|-------|--------|-------------------|-------------------|
| ① | Product sequence number     | 3                 |       |        |                   | PRODSEQUENCE      |
| ② | When did you change the bag | dd MMM yyyy HH:nn |       |        |                   | CNGPREVDT         |



**Production Germany 14. Jan. 2020: Primary matrix**  
**Folder: Product change TP1**  
**Form: Bag change**  
**Generated On: 30 Sep 2020 12:31:31**

---

Product sequence number \_\_\_\_\_ ①

---

Photo of the baseplate on the skin \_\_\_\_\_ ②

---

Baseplate on skin photo file name \_\_\_\_\_ ③

---

Baseplate on skin photo date and time \_\_\_\_\_ ④

---

**Production Germany 14. Jan. 2020: Primary matrix**

**Folder: Product change TP1**

**Form: Bag change**

**Generated On: 30 Sep 2020 12:31:31**

---

| Field Name                            | Data Type            | Units | Values | Pre-Filled Values | Include Field OID  |
|---------------------------------------|----------------------|-------|--------|-------------------|--------------------|
| ① Product sequence number             | 3                    |       |        |                   | PRODSEQUENCE       |
| ② Photo of the1 baseplate on the skin |                      |       |        |                   | PHOTO_BP<br>ONSKIN |
| ③ Photo file name                     | \$100                |       |        |                   | BPONSKIN_<br>PHOTO |
| ④ Baseplate on skin photo             | dd MMM<br>yyyy HH:nn |       |        |                   | PHT03DTC           |

---

**Production Germany 14. Jan. 2020: Primary matrix**  
**Folder: Product change TP1**  
**Form: Time for performing change of BP**  
**Generated On: 30 Sep 2020 12:31:31**

---

Product sequence number \_\_\_\_\_

①

---

Are you going to change now or have you changed previously?

I am going to change now  ②

I have changed previously   
without using the app (e.g.  
during the night)

---

③

---

**Production Germany 14. Jan. 2020: Primary matrix**

**Folder: Product change TP1**

**Form: Time for performing change of BP**

**Generated On: 30 Sep 2020 12:31:31**

| Field Name                                | Data Type | Units | Values                                                                                                      | Pre-Filled Values                                                              | Include Field OID |
|-------------------------------------------|-----------|-------|-------------------------------------------------------------------------------------------------------------|--------------------------------------------------------------------------------|-------------------|
| ① Product sequence number                 | 3         |       |                                                                                                             |                                                                                | PRODSEQUENCE      |
| ② Time for performing change of baseplate | \$1       |       | N = I am going to change now<br>P = I have changed previously without using the app (e.g. during the night) |                                                                                | CHANGETIME_BP     |
| ③ HIDDEN                                  | \$100     |       | {<br>"CNGnowpr<br>ev": {<br>"N":<br>"BPCNG",<br>"P":<br>"BPCNGPRE<br>V" } }                                 | 1: {<br>"CNGnowpr<br>ev": {<br>"N":<br>"BPCNG",<br>"P":<br>"BPCNGPRE<br>V" } } | HIDDEN            |

**Production Germany 14. Jan. 2020: Primary matrix**  
**Folder: Product change TP1**  
**Form: Baseplate change previously**  
**Generated On: 30 Sep 2020 12:31:31**

---

Product sequence number

①

---

When did you change the product (approximately)?

②

**Production Germany 14. Jan. 2020: Primary matrix**  
**Folder: Product change TP1**  
**Form: Baseplate change previously**  
**Generated On: 30 Sep 2020 12:31:31**

---

| Field Name                  | Data Type            | Units | Values | Pre-Filled Values | Include Field OID |
|-----------------------------|----------------------|-------|--------|-------------------|-------------------|
| ① Product sequence number   | 3                    |       |        |                   | PRODSEQUENCE      |
| ② Product change previously | dd MMM<br>yyyy HH:nn |       |        |                   | CNGPREVDTTC       |

---

**Production Germany 14. Jan. 2020: Primary matrix**

**Folder: Product change TP1**

**Form: Baseplate change TP 1**

**Generated On: 30 Sep 2020 12:31:31**

---

Product sequence number \_\_\_\_\_ ①

---

Photo of the stoma \_\_\_\_\_ ②

---

Stoma photo file name \_\_\_\_\_ ③

---

Stoma photo date and time \_\_\_\_\_ ④

---

Photo of the product \_\_\_\_\_ ⑤

---

Product photo file name \_\_\_\_\_ ⑥

---

Product photo date and time \_\_\_\_\_ ⑦

---

Do you experience any bleeding from the skin around your stoma right now when changing your product? Not experiencing  ⑧  
Experiencing

---

Once you have cleaned and dried the skin, do you still experience any weeping or moisture on the skin around your stoma right now when changing your product? Not experiencing  ⑨  
Experiencing

---

Are you experiencing any ulcers or sores around your stoma right now when changing your product? Not experiencing  ⑩  
Experiencing

---

How much of the time have you experienced any itching around your stoma since you last changed your product? None of the time  ⑪  
A little of the time   
Some of the time   
A lot of the time   
All of the time

Production Germany 14. Jan. 2020: Primary matrix  
Folder: Product change TP1  
Form: Baseplate change TP 1  
Generated On: 30 Sep 2020 12:31:31

---

Please rate on a scale from 0-10 how itchy the skin around your stoma has been at its worst since you last changed your product

- 0 No itch  12
  - 1 Very mild itch
  - 2
  - 3
  - 4
  - 5
  - 6
  - 7
  - 8
  - 9
  - 10 Worst possible peristomal skin itch
- 

How much of the time have you experienced any pain around your stoma since you last changed your product?

- None of the time  13
  - A little of the time
  - Some of the time
  - A lot of the time
  - All of the time
- 

Please rate on a scale from 0-10 how painful the skin around your stoma has been at its worst since you last changed your product

- 0 No pain  14
  - 1 Very mild pain
  - 2
  - 3
  - 4
  - 5
  - 6
  - 7
  - 8
  - 9
  - 10 Worst possible peristomal skin pain
-



**Production Germany 14. Jan. 2020: Primary matrix**  
**Folder: Product change TP1**  
**Form: Baseplate change TP 1**  
**Generated On: 30 Sep 2020 12:31:31**

---

How much of the time have you experienced any burning feelings from the skin around your stoma since you last changed your product?

- None of the time  15
  - A little of the time
  - Some of the time
  - A lot of the time
  - All of the time
- 

Please rate on a scale from 0-10 any burning feelings from the skin around your stoma at its worst since you last changed your product

- 0 No burning  16
  - 1 Very mild burning
  - 2
  - 3
  - 4
  - 5
  - 6
  - 7
  - 8
  - 9
  - 10 Worst possible peristomal skin burning
- 

How would you rate on a scale of 0-10 your overall physical discomfort from the skin around your stoma since you last changed your product?

- 0 No discomfort  17
  - 1
  - 2
  - 3
  - 4
  - 5
  - 6
  - 7
  - 8
  - 9
  - 10 A lot of discomfort
-

On a scale of 0-10, how much have skin complications around your stoma caused you difficulty in your overall ability to move around since you last changed your product? For example, bending or walking

No skin complications  18

0 No difficulty

1

2

3

4

5

6

7

8

9

10 A lot of difficulty

---

On a scale of 0-10, how much have skin complications around your stoma caused you difficulty in your overall ability to stick the stoma bag adhesive to your skin since you last changed your product?

No skin complications  19

0 No difficulty

1

2

3

4

5

6

7

8

9

10 A lot of difficulty

---

What was the main reason for change of the baseplate? \_\_\_\_\_  20

I followed my usual changing pattern \_\_\_\_\_  21

---

**Production Germany 14. Jan. 2020: Primary matrix**  
**Folder: Product change TP1**  
**Form: Baseplate change TP 1**  
**Generated On: 30 Sep 2020 12:31:31**

---

I thought it would be nice with a clean product \_\_\_\_\_ (22)

---

In preparation of an activity (i.e. going out, doing sports, travelling) \_\_\_\_\_ (23)

---

The entire baseplate had become detached \_\_\_\_\_ (24)

---

The outer edge of the baseplate had become detached \_\_\_\_\_ (25)

---

The center of the baseplate had become detached \_\_\_\_\_ (26)

---

I was afraid the baseplate would become detached \_\_\_\_\_ (27)

---

The area around the stoma was itching \_\_\_\_\_ (28)

---

The area around the stoma was painful \_\_\_\_\_ (29)

---

There was leakage underneath and outside the baseplate \_\_\_\_\_ (30)

---

There was leakage underneath the baseplate (but not outside the baseplate) \_\_\_\_\_ (31)

---

The bag was full of air (ballooning) \_\_\_\_\_ (32)

---

There was a vacuum in the bag (pancaking) \_\_\_\_\_ (33)

---

Due to visit in the investigation \_\_\_\_\_ (34)

---

Other reason \_\_\_\_\_ (35)

---

---

**Production Germany 14. Jan. 2020: Primary matrix**  
**Folder: Product change TP1**  
**Form: Baseplate change TP 1**  
**Generated On: 30 Sep 2020 12:31:31**

---

If other reason for change is selected, please specify \_\_\_\_\_ **36**

---

Did you experience leakage outside the baseplate (i.e. soiling the clothes)?

No  **37**  
Yes

---

Did you experience the bag becoming overfilled with air during use (ballooning)?

Not at all  **38**  
A little   
Some   
Much   
Very much

---

Which stoma accessories did you use?

---

None \_\_\_\_\_ **40**

---

Adhesive remover \_\_\_\_\_ **41**

---

Paste \_\_\_\_\_ **42**

---

Rings \_\_\_\_\_ **43**

---

Ostomy tape \_\_\_\_\_ **44**

---

Ostomy belt \_\_\_\_\_ **45**

---

Hernia belt \_\_\_\_\_ **46**

---

Stoma powder \_\_\_\_\_ **47**

---

---

**Production Germany 14. Jan. 2020: Primary matrix**  
**Folder: Product change TP1**  
**Form: Baseplate change TP 1**  
**Generated On: 30 Sep 2020 12:31:31**

---

|                                 |       |    |
|---------------------------------|-------|----|
| Barrier lotion                  | _____ | 48 |
| Barrier cream                   | _____ | 49 |
| Barrier spray                   | _____ | 50 |
| Barrier wipes                   | _____ | 51 |
| Cleansing wipes/cleansing spray | _____ | 52 |
| Odour remover                   | _____ | 53 |
| Other accessories               | _____ | 54 |
| If 'Other' please specify:      | _____ | 55 |

---

**Production Germany 14. Jan. 2020: Primary matrix**

**Folder: Product change TP1**

**Form: Baseplate change TP 1**

**Generated On: 30 Sep 2020 12:31:31**

|   | Field Name                  | Data Type            | Units | Values                                   | Pre-Filled Values | Include Field OID |
|---|-----------------------------|----------------------|-------|------------------------------------------|-------------------|-------------------|
| ① | Product sequence number     | 3                    |       |                                          |                   | PRODSEQUENCE      |
| ② | Photo of the stoma          | 1                    |       |                                          |                   | PHOTO_SKIN        |
| ③ | Stoma photo name            | \$100                |       |                                          |                   | PHT0101           |
| ④ | Stoma photo date and time   | dd MMM<br>yyyy HH:nn |       |                                          |                   | PHT01DTC          |
| ⑤ | Photo of the product        | 1                    |       |                                          |                   | PHOTO_PRODUCT     |
| ⑥ | Product photo name          | \$100                |       |                                          |                   | PROD_PHOTO        |
| ⑦ | Product photo date and time | dd MMM<br>yyyy HH:nn |       |                                          |                   | PHT02DTC          |
| ⑧ | Ostomy Skin Tool 1          | 1                    |       | 0 = Not experiencing<br>1 = Experiencing |                   | OST_1             |

**Production Germany 14. Jan. 2020: Primary matrix**

**Folder: Product change TP1**

**Form: Baseplate change TP 1**

**Generated On: 30 Sep 2020 12:31:31**

| Field Name            | Data Type | Units | Values                                                                                                                   | Pre-Filled Values | Include Field OID |
|-----------------------|-----------|-------|--------------------------------------------------------------------------------------------------------------------------|-------------------|-------------------|
| 9 Ostomy Skin Tool 2  | 1         |       | 0 = Not experiencing<br>1 = Experiencing                                                                                 |                   | OST_2             |
| 10 Ostomy Skin Tool 3 | 1         |       | 0 = Not experiencing<br>1 = Experiencing                                                                                 |                   | OST_3             |
| 11 Ostomy Skin Tool 4 | 1         |       | 1 = None of the time<br>2 = A little of the time<br>3 = Some of the time<br>4 = A lot of the time<br>5 = All of the time |                   | OST_4             |
| 12 Ostomy Skin Tool 5 | 2         |       | 0 = 0 No itch<br>1 = 1 Very mild itch<br>2 = 2<br>3 = 3<br>4 = 4<br>5 = 5<br>6 = 6<br>7 = 7                              |                   | LONGSCALE_OST_5   |

**Production Germany 14. Jan. 2020: Primary matrix**

**Folder: Product change TP1**

**Form: Baseplate change TP 1**

**Generated On: 30 Sep 2020 12:31:31**

| Field Name                                                                                             | Data Type | Units | Values                                                                                                                                                          | Pre-Filled Values | Include Field OID |
|--------------------------------------------------------------------------------------------------------|-----------|-------|-----------------------------------------------------------------------------------------------------------------------------------------------------------------|-------------------|-------------------|
|                                                                                                        |           |       | 8 = 8<br>9 = 9<br>10 = 10<br>Worst possible peristomal skin itch                                                                                                |                   |                   |
|  Ostomy Skin Tool 6   |           | 1     | 1 = None of the time<br>2 = A little of the time<br>3 = Some of the time<br>4 = A lot of the time<br>5 = All of the time                                        |                   | OST_6             |
|  Ostomy Skin Tool 7 |           | 2     | 0 = 0 No pain<br>1 = 1 Very mild pain<br>2 = 2<br>3 = 3<br>4 = 4<br>5 = 5<br>6 = 6<br>7 = 7<br>8 = 8<br>9 = 9<br>10 = 10<br>Worst possible peristomal skin pain |                   | LONGSCALE_OST_7   |



**Production Germany 14. Jan. 2020: Primary matrix**

**Folder: Product change TP1**

**Form: Baseplate change TP 1**

**Generated On: 30 Sep 2020 12:31:31**

---

| Field Name                    | Data Type | Units | Values                                                                                                                                                                | Pre-Filled Values | Include Field OID |
|-------------------------------|-----------|-------|-----------------------------------------------------------------------------------------------------------------------------------------------------------------------|-------------------|-------------------|
| <b>15</b> Ostomy Skin Tool 8  | 1         |       | 1 = None of the time<br>2 = A little of the time<br>3 = Some of the time<br>4 = A lot of the time<br>5 = All of the time                                              |                   | OST_8             |
| <b>16</b> Ostomy Skin Tool 9  | 2         |       | 0 = 0 No burning<br>1 = 1 Very mild burning<br>2 = 2<br>3 = 3<br>4 = 4<br>5 = 5<br>6 = 6<br>7 = 7<br>8 = 8<br>9 = 9<br>10 = 10 Worst possible peristomal skin burning |                   | LONGSCALE_OST_9   |
| <b>17</b> Ostomy Skin Tool 10 | 2         |       | 0 = 0 No discomfort<br>1 = 1<br>2 = 2<br>3 = 3<br>4 = 4                                                                                                               |                   | LONGSCALE_OST_10  |

---

**Production Germany 14. Jan. 2020: Primary matrix**

**Folder: Product change TP1**

**Form: Baseplate change TP 1**

**Generated On: 30 Sep 2020 12:31:31**

| Field Name                                                                                              | Data Type | Units | Values                                                                                                                                                               | Pre-Filled Values | Include Field OID    |
|---------------------------------------------------------------------------------------------------------|-----------|-------|----------------------------------------------------------------------------------------------------------------------------------------------------------------------|-------------------|----------------------|
|                                                                                                         |           |       | 5 = 5<br>6 = 6<br>7 = 7<br>8 = 8<br>9 = 9<br>10 = 10 A<br>lot of<br>discomfort                                                                                       |                   |                      |
|  Ostomy Skin Tool 11   | 2         |       | 99 = No skin complications<br>0 = 0 No difficulty<br>1 = 1<br>2 = 2<br>3 = 3<br>4 = 4<br>5 = 5<br>6 = 6<br>7 = 7<br>8 = 8<br>9 = 9<br>10 = 10 A<br>lot of difficulty |                   | LONGSCALE<br>_OST_11 |
|  Ostomy Skin Tool 12 | 2         |       | 99 = No skin complications<br>0 = 0 No difficulty<br>1 = 1<br>2 = 2                                                                                                  |                   | LONGSCALE<br>_OST_12 |

**Production Germany 14. Jan. 2020: Primary matrix**

**Folder: Product change TP1**

**Form: Baseplate change TP 1**

**Generated On: 30 Sep 2020 12:31:31**

| Field Name | Data Type               | Units | Values                                                                                           | Pre-Filled Values | Include Field OID |
|------------|-------------------------|-------|--------------------------------------------------------------------------------------------------|-------------------|-------------------|
|            |                         |       | 3 = 3<br>4 = 4<br>5 = 5<br>6 = 6<br>7 = 7<br>8 = 8<br>9 = 9<br>10 = 10 A<br>lot of<br>difficulty |                   |                   |
| 20         | MULTI_CNG1_HEADER       |       |                                                                                                  |                   | MULTI_CNG_HEADER  |
| 21         | Reason for change no. 1 | 1     |                                                                                                  |                   | MULTI_CNG_1       |
| 22         | Reason for change no. 2 | 2     |                                                                                                  |                   | MULTI_CNG_2       |
| 23         | Reason for change no. 3 | 3     |                                                                                                  |                   | MULTI_CNG_3       |
| 24         | Reason for change no. 4 | 4     |                                                                                                  |                   | MULTI_CNG_4       |

**Production Germany 14. Jan. 2020: Primary matrix**

**Folder: Product change TP1**

**Form: Baseplate change TP 1**

**Generated On: 30 Sep 2020 12:31:31**

| Field Name                  | Data Type | Units | Values | Pre-Filled Values | Include Field OID |
|-----------------------------|-----------|-------|--------|-------------------|-------------------|
| 25 Reason for change no. 5  | 1         |       |        |                   | MULTI_CNG_5       |
| 26 Reason for change no. 6  | 1         |       |        |                   | MULTI_CNG_6       |
| 27 Reason for change no. 7  | 1         |       |        |                   | MULTI_CNG_7       |
| 28 Reason for change no. 8  | 1         |       |        |                   | MULTI_CNG_8       |
| 29 Reason for change no. 9  | 1         |       |        |                   | MULTI_CNG_9       |
| 30 Reason for change no. 10 | 1         |       |        |                   | MULTI_CNG_10      |
| 31 Reason for change no. 11 | 1         |       |        |                   | MULTI_CNG_11      |
| 32 Reason for change no. 12 | 1         |       |        |                   | MULTI_CNG_12      |

**Production Germany 14. Jan. 2020: Primary matrix**

**Folder: Product change TP1**

**Form: Baseplate change TP 1**

**Generated On: 30 Sep 2020 12:31:31**

| Field Name                                | Data Type | Units | Values                                                                  | Pre-Filled Values | Include Field OID |
|-------------------------------------------|-----------|-------|-------------------------------------------------------------------------|-------------------|-------------------|
| 33 Reason for change no. 13               | 1         |       |                                                                         |                   | MULTI_CNG_13      |
| 34 Reason for change no. 14               | 1         |       |                                                                         |                   | MULTI_CNG_14      |
| 35 Reason for change no. 15               | 1         |       |                                                                         |                   | MULTI_CNG_15      |
| 36 Description of other reason for change | \$100     |       |                                                                         |                   | MULTI_CNG_OTHER   |
| 37 Leakage outside                        | 1         |       | 0 = No<br>1 = Yes                                                       |                   | LEAKAGE_OUTSIDE   |
| 38 Degree of ballooning                   | 1         |       | 1 = Not at all<br>2 = A little<br>3 = Some<br>4 = Much<br>5 = Very much |                   | BALLOONING_DEGREE |
| 40 Accessories 1                          | 1         |       |                                                                         |                   | MULTI_ACC_1       |

**Production Germany 14. Jan. 2020: Primary matrix**  
**Folder: Product change TP1**  
**Form: Baseplate change TP 1**  
**Generated On: 30 Sep 2020 12:31:31**

| Field Name             | Data Type | Units | Values | Pre-Filled Values | Include Field OID |
|------------------------|-----------|-------|--------|-------------------|-------------------|
| 41 Accessories 1<br>2  |           |       |        |                   | MULTI_ACC<br>_2   |
| 42 Accessories 1<br>3  |           |       |        |                   | MULTI_ACC<br>_3   |
| 43 Accessories 1<br>4  |           |       |        |                   | MULTI_ACC<br>_4   |
| 44 Accessories 1<br>5  |           |       |        |                   | MULTI_ACC<br>_5   |
| 45 Accessories 1<br>6  |           |       |        |                   | MULTI_ACC<br>_6   |
| 46 Accessories 1<br>7  |           |       |        |                   | MULTI_ACC<br>_7   |
| 47 Accessories 1<br>8  |           |       |        |                   | MULTI_ACC<br>_8   |
| 48 Accessories 1<br>9  |           |       |        |                   | MULTI_ACC<br>_9   |
| 49 Accessories 1<br>10 |           |       |        |                   | MULTI_ACC<br>_10  |
| 50 Accessories 1<br>11 |           |       |        |                   | MULTI_ACC<br>_11  |

**Production Germany 14. Jan. 2020: Primary matrix**  
**Folder: Product change TP1**  
**Form: Baseplate change TP 1**  
**Generated On: 30 Sep 2020 12:31:31**

| Field Name                   | Data Type | Units | Values | Pre-Filled Values | Include Field OID   |
|------------------------------|-----------|-------|--------|-------------------|---------------------|
| 51 Accessories 1<br>12       |           |       |        |                   | MULTI_ACC<br>_12    |
| 52 Accessories 1<br>13       |           |       |        |                   | MULTI_ACC<br>_13    |
| 53 Accessories 1<br>14       |           |       |        |                   | MULTI_ACC<br>_14    |
| 54 Accessories 1<br>15       |           |       |        |                   | MULTI_ACC<br>_15    |
| 55 Accessories \$50<br>other |           |       |        |                   | MULTI_ACC<br>_OTHER |

Do you have any skin complications around your stoma today?

No  ①  
Yes

---

If yes, how would you describe the skin complications around your stoma today?

No skin complications  ②  
Very mild   
Mild   
Moderate   
Severe   
Very severe

---

How often have you experienced itchy skin around your stoma in the past 14 days?

None of the time  ③  
A little of the time   
Some of the time   
A lot of the time   
All of the time

---

How often have you experienced any pain in the skin around the stoma in the past 14 days?

None of the time  ④  
A little of the time   
Some of the time   
A lot of the time   
All of the time

---

How often have you experienced burning feelings in the skin around your stoma in the past 14 days?

None of the time  ⑤  
A little of the time   
Some of the time   
A lot of the time   
All of the time

---



**Production Germany 14. Jan. 2020: Primary matrix**

**Folder: Final evaluation TP1**

**Form: Final evaluation TP 1**

**Generated On: 30 Sep 2020 12:31:31**

---

Compared to the beginning of this test period (Test Period 1) how have any skin complications around your stoma changed?

- Very much improved  **6**
- Much improved
- A little improved
- No change
- A little worse
- Much worse
- Very much worse

---

Did your stoma behave differently from normal since your last visit/call?

- No  **7**
- Yes

---

If yes, please describe \_\_\_\_\_ **8**

---

Emotional impact. In the last seven days, due to leakage or worry about leakage... (please tick the box to continue) \_\_\_\_\_ **9**

---

I felt panic

- All of the time  **10**
- Often
- Sometimes
- Rarely or never

---

I felt stressed out

- All of the time  **11**
- Often
- Sometimes
- Rarely or never

---

I felt more afraid about leaks in the future

- All of the time  **12**
- Often

Production Germany 14. Jan. 2020: Primary matrix

Folder: Final evaluation TP1

Form: Final evaluation TP 1

Generated On: 30 Sep 2020 12:31:31

---

Sometimes

Rarely or never

---

I felt worry

All of the time  13

Often

Sometimes

Rarely or never

---

I felt frustrated

All of the time  14

Often

Sometimes

Rarely or never

---

I felt embarrassed

All of the time  15

Often

Sometimes

Rarely or never

---

I felt worried that I might leak

All of the time  16

Often

Sometimes

Rarely or never

---

I couldn't sleep

All of the time  17

Often

Sometimes

Rarely or never

Production Germany 14. Jan. 2020: Primary matrix

Folder: Final evaluation TP1

Form: Final evaluation TP 1

Generated On: 30 Sep 2020 12:31:31

---

I kept waking up at night to check my stoma

- All of the time  18  
Often   
Sometimes   
Rarely or never

---

I kept checking my ostomy bag to see if I have leaked

- All of the time  19  
Often   
Sometimes   
Rarely or never

---

Usual and social activities.  
In the last seven days due to leakage or worry about  
leakage... (please tick to continue)

20

---

I decided to stay at home

- All of the time  21  
Often   
Sometimes   
Rarely or never   
Not applicable

---

I couldn't do light activities

- All of the time  22  
Often   
Sometimes   
Rarely or never   
Not applicable

---

I changed my plans

- All of the time  23  
Often   
Sometimes

Production Germany 14. Jan. 2020: Primary matrix

Folder: Final evaluation TP1

Form: Final evaluation TP 1

Generated On: 30 Sep 2020 12:31:31

---

Rarely or never

Not applicable

---

I was unable to go out and meet family and friends

All of the time  24

Often

Sometimes

Rarely or never

Not applicable

---

I avoided close physical contact with family and friends

All of the time  25

Often

Sometimes

Rarely or never

Not applicable

---

I did not want to see people

All of the time  26

Often

Sometimes

Rarely or never

Not applicable

---

I avoided people

All of the time  27

Often

Sometimes

Rarely or never

Not applicable

---

I tried to avoid meeting new people

All of the time  28

Often

Sometimes   
Rarely or never   
Not applicable

---

Coping and in control.  
In the last 7 days, due to leakage or worry about  
leakage...

---

29

I felt in control

All of the time  30  
Often   
Sometimes   
Rarely or never

---

I was able to cope

All of the time  31  
Often   
Sometimes   
Rarely or never

---

I felt calm

All of the time  32  
Often   
Sometimes   
Rarely or never

---

I saw my friends as I usually do

All of the time  33  
Often   
Sometimes   
Rarely or never

---

Production Germany 14. Jan. 2020: Primary matrix

Folder: Final evaluation TP1

Form: Final evaluation TP 1

Generated On: 30 Sep 2020 12:31:31

---

Discreetness.

In the last seven days...

34

---

It was difficult to hide the stoma appliance under clothing

Strongly agree  35  
Slightly agree   
Neither agree nor disagree   
Slightly disagree   
Strongly disagree

---

I was self-conscious about the appearance of the stoma appliance

Strongly agree  36  
Slightly agree   
Neither agree nor disagree   
Slightly disagree   
Strongly disagree

---

The stoma appliance limited the choice of clothes that I could wear

Strongly agree  37  
Slightly agree   
Neither agree nor disagree   
Slightly disagree   
Strongly disagree

---

The stoma appliance was obvious to other people

Strongly agree  38  
Slightly agree   
Neither agree nor disagree   
Slightly disagree   
Strongly disagree

---

The color of the stoma appliance was discreet

Strongly agree  39  
Slightly agree

Production Germany 14. Jan. 2020: Primary matrix

Folder: Final evaluation TP1

Form: Final evaluation TP 1

Generated On: 30 Sep 2020 12:31:31

---

Neither agree nor disagree

Slightly disagree

Strongly disagree

---

It was difficult to hide the stoma appliance because of ballooning

Strongly agree  40

Slightly agree

Neither agree nor disagree

Slightly disagree

Strongly disagree

---

Comfort.  
In the last seven days...

41

---

The stoma appliance was comfortable to wear

Strongly agree  42

Slightly agree

Neither agree nor disagree

Slightly disagree

Strongly disagree

---

I was not concerned about skin irritation under the stoma appliance (for example feelings of burning, itching, pinching or pain)

Strongly agree  43

Slightly agree

Neither agree nor disagree

Slightly disagree

Strongly disagree

---

It was uncomfortable to remove the stoma appliance from my body

Strongly agree  44

Slightly agree

Neither agree nor disagree

Slightly disagree

Production Germany 14. Jan. 2020: Primary matrix

Folder: Final evaluation TP1

Form: Final evaluation TP 1

Generated On: 30 Sep 2020 12:31:31

---

Strongly disagree

---

I often forgot that I was wearing the stoma appliance

Strongly agree  45  
Slightly agree   
Neither agree nor disagree   
Slightly disagree   
Strongly disagree

---

The stoma appliance was comfortable as it fitted well to my body movements

Strongly agree  46  
Slightly agree   
Neither agree nor disagree   
Slightly disagree   
Strongly disagree

---

The stoma appliance disrupted my sleep during the night

Strongly agree  47  
Slightly agree   
Neither agree nor disagree   
Slightly disagree   
Strongly disagree

---

Confidence.  
In the last seven days...

48

---

I was confident that the stoma appliance would not leak

Strongly agree  49  
Slightly agree   
Neither agree nor disagree   
Slightly disagree   
Strongly disagree

---



**Production Germany 14. Jan. 2020: Primary matrix**

**Folder: Final evaluation TP1**

**Form: Final evaluation TP 1**

**Generated On: 30 Sep 2020 12:31:31**

---

I worried that the stoma appliance would become loose from my body

- Strongly agree  50
- Slightly agree
- Neither agree nor disagree
- Slightly disagree
- Strongly disagree
- 

I felt confident that I could spend the night away from home despite wearing the stoma appliance

- Strongly agree  51
- Slightly agree
- Neither agree nor disagree
- Slightly disagree
- Strongly disagree
- 

I was confident the stoma appliance would not cause any problems for me

- Strongly agree  52
- Slightly agree
- Neither agree nor disagree
- Slightly disagree
- Strongly disagree
- 

I felt confident to take part in physical activities (for example, sports) whilst wearing the stoma appliance

- Strongly agree  53
- Slightly agree
- Neither agree nor disagree
- Slightly disagree
- Strongly disagree
- 

I worried that the stoma appliance would make a rustling noise

- Strongly agree  54
- Slightly agree
- Neither agree nor disagree
- Slightly disagree
- Strongly disagree
-

Production Germany 14. Jan. 2020: Primary matrix

Folder: Final evaluation TP1

Form: Final evaluation TP 1

Generated On: 30 Sep 2020 12:31:31

---

Social life and relationships.  
In the last seven days...

55

---

I worried that my family and friends felt awkward around  
me because of the stoma appliance

- Strongly agree  56
- Slightly agree
- Neither agree nor disagree
- Slightly disagree
- Strongly disagree

---

I felt my social life had been restricted because of the  
stoma appliance

- Strongly agree  57
- Slightly agree
- Neither agree nor disagree
- Slightly disagree
- Strongly disagree

---

I avoided close physical contact with family and friends  
because of the stoma appliance

- Strongly agree  58
- Slightly agree
- Neither agree nor disagree
- Slightly disagree
- Strongly disagree

---

I worried about whether I could have a relationship  
because of my stoma appliance

- Strongly agree  59
- Slightly agree
- Neither agree nor disagree
- Slightly disagree
- Strongly disagree

---

I worried about whether the stoma appliance would  
affect my sex life

- Strongly agree  60
- Slightly agree

Production Germany 14. Jan. 2020: Primary matrix

Folder: Final evaluation TP1

Form: Final evaluation TP 1

Generated On: 30 Sep 2020 12:31:31

- 
- Neither agree nor disagree
- Slightly disagree
- Strongly disagree

---

How was the feeling of security while wearing the product?

- Very poor  61
- Poor
- Neither poor nor good
- Good
- Very good

---

How did you find cutting the baseplate?

- Very difficult  62
- Difficult
- Neither difficult nor easy
- Easy
- Very easy

---

How did you find applying the baseplate?

- Very difficult  63
- Difficult
- Neither difficult nor easy
- Easy
- Very easy

---

How did you find removing the baseplate?

- Very difficult  64
- Difficult
- Neither difficult nor easy
- Easy
- Very easy

**Production Germany 14. Jan. 2020: Primary matrix**

**Folder: Final evaluation TP1**

**Form: Final evaluation TP 1**

**Generated On: 30 Sep 2020 12:31:31**

| Field Name                  | Data Type | Units | Values                                                                                                                   | Pre-Filled Values | Include Field OID |
|-----------------------------|-----------|-------|--------------------------------------------------------------------------------------------------------------------------|-------------------|-------------------|
| ① Complications today       | 1         |       | 0 = No<br>1 = Yes                                                                                                        |                   | COMP_TODAY        |
| ② Severity of complications | 1         |       | 0 = No skin complications<br>1 = Very mild<br>2 = Mild<br>3 = Moderate<br>4 = Severe<br>5 = Very severe                  |                   | COMP_IF_YES       |
| ③ Itching in 14 days        | 1         |       | 1 = None of the time<br>2 = A little of the time<br>3 = Some of the time<br>4 = A lot of the time<br>5 = All of the time |                   | ITCHING_14DAYS    |
| ④ Pain in 14 days           | 1         |       | 1 = None of the time<br>2 = A little of the time<br>3 = Some of the time<br>4 = A lot of the time                        |                   | PAIN_14DAYS       |

**Production Germany 14. Jan. 2020: Primary matrix**

**Folder: Final evaluation TP1**

**Form: Final evaluation TP 1**

**Generated On: 30 Sep 2020 12:31:31**

| Field Name               | Data Type | Units | Values                                                                                                                                               | Pre-Filled Values | Include Field OID |
|--------------------------|-----------|-------|------------------------------------------------------------------------------------------------------------------------------------------------------|-------------------|-------------------|
|                          |           |       | 5 = All of the time                                                                                                                                  |                   |                   |
| ⑤ Burning in 14 days     | 1         |       | 1 = None of the time<br>2 = A little of the time<br>3 = Some of the time<br>4 = A lot of the time<br>5 = All of the time                             |                   | BURNING_14DAYS    |
| ⑥ Own comparison of skin | 1         |       | 1 = Very much improved<br>2 = Much improved<br>3 = A little improved<br>4 = No change<br>5 = A little worse<br>6 = Much worse<br>7 = Very much worse |                   | COMPARE_OWN       |
| ⑦ Stoma behaviour        | 1         |       | 0 = No<br>1 = Yes                                                                                                                                    |                   | STOMABEHAVE_YN    |

**Production Germany 14. Jan. 2020: Primary matrix**

**Folder: Final evaluation TP1**

**Form: Final evaluation TP 1**

**Generated On: 30 Sep 2020 12:31:31**

| Field Name                  | Data Type | Units | Values                                                                   | Pre-Filled Values | Include Field OID |
|-----------------------------|-----------|-------|--------------------------------------------------------------------------|-------------------|-------------------|
| 8 Different stoma behaviour | \$200     |       |                                                                          |                   | BEHAVE_IF_YES     |
| 9 LEAKAGE_H1 EADER          |           |       |                                                                          |                   | LEAKAGE_H EADER   |
| 10 LEAKAGE_Q1 S_1           |           |       | 0 = All of the time<br>1 = Often<br>2 = Sometimes<br>3 = Rarely or never |                   | LEAKAGE_Q S_1     |
| 11 LEAKAGE_Q1 S_2           |           |       | 0 = All of the time<br>1 = Often<br>2 = Sometimes<br>3 = Rarely or never |                   | LEAKAGE_Q S_2     |
| 12 LEAKAGE_Q1 S_3           |           |       | 0 = All of the time<br>1 = Often<br>2 = Sometimes<br>3 = Rarely or never |                   | LEAKAGE_Q S_3     |
| 13 LEAKAGE_Q1 S_4           |           |       | 0 = All of the time                                                      |                   | LEAKAGE_Q S_4     |

**Production Germany 14. Jan. 2020: Primary matrix**

**Folder: Final evaluation TP1**

**Form: Final evaluation TP 1**

**Generated On: 30 Sep 2020 12:31:31**

| Field Name           | Data Type | Units | Values                                                                            | Pre-Filled Values | Include Field OID |
|----------------------|-----------|-------|-----------------------------------------------------------------------------------|-------------------|-------------------|
|                      |           |       | 1 = Often<br>2 =<br>Sometimes<br>3 = Rarely<br>or never                           |                   |                   |
| 14 LEAKAGE_Q1<br>S_5 |           |       | 0 = All of<br>the time<br>1 = Often<br>2 =<br>Sometimes<br>3 = Rarely<br>or never |                   | LEAKAGE_Q<br>S_5  |
| 15 LEAKAGE_Q1<br>S_6 |           |       | 0 = All of<br>the time<br>1 = Often<br>2 =<br>Sometimes<br>3 = Rarely<br>or never |                   | LEAKAGE_Q<br>S_6  |
| 16 LEAKAGE_Q1<br>S_7 |           |       | 0 = All of<br>the time<br>1 = Often<br>2 =<br>Sometimes<br>3 = Rarely<br>or never |                   | LEAKAGE_Q<br>S_7  |
| 17 LEAKAGE_Q1<br>S_8 |           |       | 0 = All of<br>the time<br>1 = Often                                               |                   | LEAKAGE_Q<br>S_8  |

Production Germany 14. Jan. 2020: Primary matrix

Folder: Final evaluation TP1

Form: Final evaluation TP 1

Generated On: 30 Sep 2020 12:31:31

| Field Name              | Data Type | Units | Values                                                                                                     | Pre-Filled Values | Include Field OID   |
|-------------------------|-----------|-------|------------------------------------------------------------------------------------------------------------|-------------------|---------------------|
|                         |           |       | 2 =<br>Sometimes<br>3 = Rarely<br>or never                                                                 |                   |                     |
| 18 LEAKAGE_Q1<br>S_9    |           |       | 0 = All of<br>the time<br>1 = Often<br>2 =<br>Sometimes<br>3 = Rarely<br>or never                          |                   | LEAKAGE_Q<br>S_9    |
| 19 LEAKAGE_Q1<br>S_10   |           |       | 0 = All of<br>the time<br>1 = Often<br>2 =<br>Sometimes<br>3 = Rarely<br>or never                          |                   | LEAKAGE_Q<br>S_10   |
| 20 LEAKAGE_H1<br>EADER2 |           |       |                                                                                                            |                   | LEAKAGE_H<br>EADER2 |
| 21 LEAKAGE_Q1<br>S_11   |           |       | 0 = All of<br>the time<br>1 = Often<br>2 =<br>Sometimes<br>3 = Rarely<br>or never<br>9 = Not<br>applicable |                   | LEAKAGE_Q<br>S_11   |



**Production Germany 14. Jan. 2020: Primary matrix**

**Folder: Final evaluation TP1**

**Form: Final evaluation TP 1**

**Generated On: 30 Sep 2020 12:31:31**

| Field Name            | Data Type | Units | Values                                                                                         | Pre-Filled Values | Include Field OID |
|-----------------------|-----------|-------|------------------------------------------------------------------------------------------------|-------------------|-------------------|
| 22 LEAKAGE_Q1<br>S_12 |           |       | 0 = All of the time<br>1 = Often<br>2 = Sometimes<br>3 = Rarely or never<br>9 = Not applicable |                   | LEAKAGE_Q<br>S_12 |
| 23 LEAKAGE_Q1<br>S_13 |           |       | 0 = All of the time<br>1 = Often<br>2 = Sometimes<br>3 = Rarely or never<br>9 = Not applicable |                   | LEAKAGE_Q<br>S_13 |
| 24 LEAKAGE_Q1<br>S_14 |           |       | 0 = All of the time<br>1 = Often<br>2 = Sometimes<br>3 = Rarely or never<br>9 = Not applicable |                   | LEAKAGE_Q<br>S_14 |
| 25 LEAKAGE_Q1<br>S_15 |           |       | 0 = All of the time<br>1 = Often<br>2 = Sometimes                                              |                   | LEAKAGE_Q<br>S_15 |

Production Germany 14. Jan. 2020: Primary matrix

Folder: Final evaluation TP1

Form: Final evaluation TP 1

Generated On: 30 Sep 2020 12:31:31

| Field Name            | Data Type | Units | Values                                                                                         | Pre-Filled Values | Include Field OID |
|-----------------------|-----------|-------|------------------------------------------------------------------------------------------------|-------------------|-------------------|
|                       |           |       | 3 = Rarely or never<br>9 = Not applicable                                                      |                   |                   |
| 26 LEAKAGE_Q1<br>S_16 |           |       | 0 = All of the time<br>1 = Often<br>2 = Sometimes<br>3 = Rarely or never<br>9 = Not applicable |                   | LEAKAGE_Q<br>S_16 |
| 27 LEAKAGE_Q1<br>S_17 |           |       | 0 = All of the time<br>1 = Often<br>2 = Sometimes<br>3 = Rarely or never<br>9 = Not applicable |                   | LEAKAGE_Q<br>S_17 |
| 28 LEAKAGE_Q1<br>S_18 |           |       | 0 = All of the time<br>1 = Often<br>2 = Sometimes<br>3 = Rarely or never<br>9 = Not applicable |                   | LEAKAGE_Q<br>S_18 |

**Production Germany 14. Jan. 2020: Primary matrix**

**Folder: Final evaluation TP1**

**Form: Final evaluation TP 1**

**Generated On: 30 Sep 2020 12:31:31**

| Field Name              | Data Type | Units | Values                                                                            | Pre-Filled Values | Include Field OID   |
|-------------------------|-----------|-------|-----------------------------------------------------------------------------------|-------------------|---------------------|
| 30 LEAKAGE_H1<br>EADER3 |           |       |                                                                                   |                   | LEAKAGE_H<br>EADER3 |
| 30 LEAKAGE_Q1<br>S_19   |           |       | 0 = All of<br>the time<br>1 = Often<br>2 =<br>Sometimes<br>3 = Rarely<br>or never |                   | LEAKAGE_Q<br>S_19   |
| 31 LEAKAGE_Q1<br>S_20   |           |       | 0 = All of<br>the time<br>1 = Often<br>2 =<br>Sometimes<br>3 = Rarely<br>or never |                   | LEAKAGE_Q<br>S_20   |
| 32 LEAKAGE_Q1<br>S_21   |           |       | 0 = All of<br>the time<br>1 = Often<br>2 =<br>Sometimes<br>3 = Rarely<br>or never |                   | LEAKAGE_Q<br>S_21   |
| 33 LEAKAGE_Q1<br>S_22   |           |       | 0 = All of<br>the time<br>1 = Often<br>2 =<br>Sometimes<br>3 = Rarely<br>or never |                   | LEAKAGE_Q<br>S_22   |

**Production Germany 14. Jan. 2020: Primary matrix**

**Folder: Final evaluation TP1**

**Form: Final evaluation TP 1**

**Generated On: 30 Sep 2020 12:31:31**

| Field Name  | Data Type | Units | Values                                                                                                                       | Pre-Filled Values | Include Field OID |
|-------------|-----------|-------|------------------------------------------------------------------------------------------------------------------------------|-------------------|-------------------|
| 34 QOLH1    | 1         |       |                                                                                                                              |                   | QOLH1             |
| 35 QOL_QS_1 | 1         |       | 1 = Strongly agree<br>2 = Slightly agree<br>3 = Neither agree nor disagree<br>4 = Slightly disagree<br>5 = Strongly disagree |                   | QOL_QS_1          |
| 36 QOL_QS_2 | 1         |       | 1 = Strongly agree<br>2 = Slightly agree<br>3 = Neither agree nor disagree<br>4 = Slightly disagree<br>5 = Strongly disagree |                   | QOL_QS_2          |
| 37 QOL_QS_3 | 1         |       | 1 = Strongly agree                                                                                                           |                   | QOL_QS_3          |

**Production Germany 14. Jan. 2020: Primary matrix**  
**Folder: Final evaluation TP1**  
**Form: Final evaluation TP 1**  
**Generated On: 30 Sep 2020 12:31:31**

| Field Name  | Data Type | Units | Values                                                                                                                       | Pre-Filled Values | Include Field OID |
|-------------|-----------|-------|------------------------------------------------------------------------------------------------------------------------------|-------------------|-------------------|
|             |           |       | 2 = Slightly agree<br>3 = Neither agree nor disagree<br>4 = Slightly disagree<br>5 = Strongly disagree                       |                   |                   |
| 38 QOL_QS_4 | 1         |       | 1 = Strongly agree<br>2 = Slightly agree<br>3 = Neither agree nor disagree<br>4 = Slightly disagree<br>5 = Strongly disagree |                   | QOL_QS_4          |
| 39 QOL_QS_5 | 1         |       | 1 = Strongly agree<br>2 = Slightly agree<br>3 = Neither agree nor disagree<br>4 = Slightly disagree                          |                   | QOL_QS_5          |

**Production Germany 14. Jan. 2020: Primary matrix**  
**Folder: Final evaluation TP1**  
**Form: Final evaluation TP 1**  
**Generated On: 30 Sep 2020 12:31:31**

| Field Name  | Data Type | Units | Values                                                                                                                       | Pre-Filled Values | Include Field OID |
|-------------|-----------|-------|------------------------------------------------------------------------------------------------------------------------------|-------------------|-------------------|
|             |           |       | 5 =<br>Strongly disagree                                                                                                     |                   |                   |
| 40 QOL_QS_6 | 1         |       | 1 = Strongly agree<br>2 = Slightly agree<br>3 = Neither agree nor disagree<br>4 = Slightly disagree<br>5 = Strongly disagree |                   | QOL_QS_6          |
| 41 QOLH2    | 1         |       |                                                                                                                              |                   | QOLH2             |
| 42 QOL_QS_7 | 1         |       | 1 = Strongly agree<br>2 = Slightly agree<br>3 = Neither agree nor disagree<br>4 = Slightly disagree<br>5 = Strongly disagree |                   | QOL_QS_7          |

**Production Germany 14. Jan. 2020: Primary matrix**

**Folder: Final evaluation TP1**

**Form: Final evaluation TP 1**

**Generated On: 30 Sep 2020 12:31:31**

---

| Field Name    | Data Type | Units | Values                                                                                                                       | Pre-Filled Values | Include Field OID |
|---------------|-----------|-------|------------------------------------------------------------------------------------------------------------------------------|-------------------|-------------------|
| 43 QOL_QS_8   | 1         |       | 1 = Strongly agree<br>2 = Slightly agree<br>3 = Neither agree nor disagree<br>4 = Slightly disagree<br>5 = Strongly disagree |                   | QOL_QS_8          |
| 44 QOL_QS_9   | 1         |       | 1 = Strongly agree<br>2 = Slightly agree<br>3 = Neither agree nor disagree<br>4 = Slightly disagree<br>5 = Strongly disagree |                   | QOL_QS_9          |
| 45 QOL_QS_101 |           |       | 1 = Strongly agree<br>2 = Slightly agree<br>3 = Neither agree nor disagree                                                   |                   | QOL_QS_10         |

---

**Production Germany 14. Jan. 2020: Primary matrix**

**Folder: Final evaluation TP1**

**Form: Final evaluation TP 1**

**Generated On: 30 Sep 2020 12:31:31**

| Field Name    | Data Type | Units | Values                                                                                                                       | Pre-Filled Values | Include Field OID |
|---------------|-----------|-------|------------------------------------------------------------------------------------------------------------------------------|-------------------|-------------------|
|               |           |       | 4 = Slightly disagree<br>5 = Strongly disagree                                                                               |                   |                   |
| 46 QOL_QS_111 |           |       | 1 = Strongly agree<br>2 = Slightly agree<br>3 = Neither agree nor disagree<br>4 = Slightly disagree<br>5 = Strongly disagree |                   | QOL_QS_11         |
| 47 QOL_QS_121 |           |       | 1 = Strongly agree<br>2 = Slightly agree<br>3 = Neither agree nor disagree<br>4 = Slightly disagree<br>5 = Strongly disagree |                   | QOL_QS_12         |



**Production Germany 14. Jan. 2020: Primary matrix**  
**Folder: Final evaluation TP1**  
**Form: Final evaluation TP 1**  
**Generated On: 30 Sep 2020 12:31:31**

| Field Name    | Data Type | Units | Values                                                                                                                       | Pre-Filled Values | Include Field OID |
|---------------|-----------|-------|------------------------------------------------------------------------------------------------------------------------------|-------------------|-------------------|
| 48 QOLH3      | 1         |       |                                                                                                                              |                   | QOLH3             |
| 49 QOL_QS_131 |           |       | 1 = Strongly agree<br>2 = Slightly agree<br>3 = Neither agree nor disagree<br>4 = Slightly disagree<br>5 = Strongly disagree |                   | QOL_QS_13         |
| 50 QOL_QS_141 |           |       | 1 = Strongly agree<br>2 = Slightly agree<br>3 = Neither agree nor disagree<br>4 = Slightly disagree<br>5 = Strongly disagree |                   | QOL_QS_14         |
| 51 QOL_QS_151 |           |       | 1 = Strongly agree                                                                                                           |                   | QOL_QS_15         |

**Production Germany 14. Jan. 2020: Primary matrix**

**Folder: Final evaluation TP1**

**Form: Final evaluation TP 1**

**Generated On: 30 Sep 2020 12:31:31**

---

| Field Name                                                                                     | Data Type | Units | Values                                                                                                                       | Pre-Filled Values | Include Field OID |
|------------------------------------------------------------------------------------------------|-----------|-------|------------------------------------------------------------------------------------------------------------------------------|-------------------|-------------------|
|                                                                                                |           |       | 2 = Slightly agree<br>3 = Neither agree nor disagree<br>4 = Slightly disagree<br>5 = Strongly disagree                       |                   |                   |
|  QOL_QS_161   |           |       | 1 = Strongly agree<br>2 = Slightly agree<br>3 = Neither agree nor disagree<br>4 = Slightly disagree<br>5 = Strongly disagree |                   | QOL_QS_16         |
|  QOL_QS_171 |           |       | 1 = Strongly agree<br>2 = Slightly agree<br>3 = Neither agree nor disagree<br>4 = Slightly disagree                          |                   | QOL_QS_17         |

---

Production Germany 14. Jan. 2020: Primary matrix

Folder: Final evaluation TP1

Form: Final evaluation TP 1

Generated On: 30 Sep 2020 12:31:31

| Field Name    | Data Type | Units | Values                                                                                                                             | Pre-Filled Values | Include Field OID |
|---------------|-----------|-------|------------------------------------------------------------------------------------------------------------------------------------|-------------------|-------------------|
|               |           |       | 5 =<br>Strongly disagree                                                                                                           |                   |                   |
| 54 QOL_QS_181 |           |       | 1 =<br>Strongly agree<br>2 = Slightly agree<br>3 = Neither agree nor disagree<br>4 = Slightly disagree<br>5 =<br>Strongly disagree |                   | QOL_QS_18         |
| 55 QOLH4      | 1         |       |                                                                                                                                    |                   | QOLH4             |
| 56 QOL_QS_191 |           |       | 1 =<br>Strongly agree<br>2 = Slightly agree<br>3 = Neither agree nor disagree<br>4 = Slightly disagree<br>5 =<br>Strongly disagree |                   | QOL_QS_19         |

**Production Germany 14. Jan. 2020: Primary matrix**

**Folder: Final evaluation TP1**

**Form: Final evaluation TP 1**

**Generated On: 30 Sep 2020 12:31:31**

---

| Field Name                                                                                     | Data Type | Units | Values                                                                                                                       | Pre-Filled Values | Include Field OID |
|------------------------------------------------------------------------------------------------|-----------|-------|------------------------------------------------------------------------------------------------------------------------------|-------------------|-------------------|
|  QOL_QS_201   |           |       | 1 = Strongly agree<br>2 = Slightly agree<br>3 = Neither agree nor disagree<br>4 = Slightly disagree<br>5 = Strongly disagree |                   | QOL_QS_20         |
|  QOL_QS_211 |           |       | 1 = Strongly agree<br>2 = Slightly agree<br>3 = Neither agree nor disagree<br>4 = Slightly disagree<br>5 = Strongly disagree |                   | QOL_QS_21         |
|  QOL_QS_221 |           |       | 1 = Strongly agree<br>2 = Slightly agree<br>3 = Neither agree nor disagree                                                   |                   | QOL_QS_22         |

---

**Production Germany 14. Jan. 2020: Primary matrix**  
**Folder: Final evaluation TP1**  
**Form: Final evaluation TP 1**  
**Generated On: 30 Sep 2020 12:31:31**

| Field Name             | Data Type | Units | Values                                                                                                                       | Pre-Filled Values | Include Field OID |
|------------------------|-----------|-------|------------------------------------------------------------------------------------------------------------------------------|-------------------|-------------------|
|                        |           |       | 4 = Slightly disagree<br>5 = Strongly disagree                                                                               |                   |                   |
| 60 QOL_QS_231          |           |       | 1 = Strongly agree<br>2 = Slightly agree<br>3 = Neither agree nor disagree<br>4 = Slightly disagree<br>5 = Strongly disagree |                   | QOL_QS_23         |
| 61 Feeling of security | 1         |       | 1 = Very poor<br>2 = Poor<br>3 = Neither poor nor good<br>4 = Good<br>5 = Very good                                          |                   | SECURITY          |
| 62 Cutting difficulty  | 1         |       | 1 = Very difficult<br>2 = Difficult                                                                                          |                   | CUTTING_D IFF     |

**Production Germany 14. Jan. 2020: Primary matrix**

**Folder: Final evaluation TP1**

**Form: Final evaluation TP 1**

**Generated On: 30 Sep 2020 12:31:31**

---

| Field Name | Data Type              | Units | Values                                                                                             | Pre-Filled Values | Include Field OID |
|------------|------------------------|-------|----------------------------------------------------------------------------------------------------|-------------------|-------------------|
|            |                        |       | 3 = Neither difficult nor easy<br>4 = Easy<br>5 = Very easy                                        |                   |                   |
| 63         | Application of product | 1     | 1 = Very difficult<br>2 = Difficult<br>3 = Neither difficult nor easy<br>4 = Easy<br>5 = Very easy |                   | APPLICATION       |
| 64         | Removal of baseplate   | 1     | 1 = Very difficult<br>2 = Difficult<br>3 = Neither difficult nor easy<br>4 = Easy<br>5 = Very easy |                   | REMOVAL           |

---

**Production Germany 14. Jan. 2020: Primary matrix**  
**Folder: Product change TP2**  
**Form: Type of change**  
**Generated On: 30 Sep 2020 12:31:31**

---

Product sequence number \_\_\_\_\_

①

---

What type of change do you want to register?

Bag change  ②  
Baseplate change

---

③

---

**Production Germany 14. Jan. 2020: Primary matrix**  
**Folder: Product change TP2**  
**Form: Type of change**  
**Generated On: 30 Sep 2020 12:31:31**

| Field Name                | Data Type | Units | Values                                                                                             | Pre-Filled Values                                                                                     | Include Field OID |
|---------------------------|-----------|-------|----------------------------------------------------------------------------------------------------|-------------------------------------------------------------------------------------------------------|-------------------|
| ① Product sequence number | 3         |       |                                                                                                    |                                                                                                       | PRODSEQUENCE      |
| ② Type of change          | \$3       |       | BAG = Bag change<br>BP = Baseplate change                                                          |                                                                                                       | CNG_TYPE          |
| ③ HIDDEN                  | \$100     |       | {<br>"Change_ty<br>pe": {<br>"BAG":<br>"CHANGETI<br>ME_BP",<br>"BP":<br>"CHANGETI<br>ME_BP" }<br>} | 1: {<br>"Change_ty<br>pe": {<br>"BAG":<br>"CHANGETI<br>ME_BP",<br>"BP":<br>"CHANGETI<br>ME_BP" }<br>} | HIDDEN            |



**Production Germany 14. Jan. 2020: Primary matrix**  
**Folder: Product change TP2**  
**Form: Time for performing change of bag**  
**Generated On: 30 Sep 2020 12:31:31**

---

Product sequence number \_\_\_\_\_

---

①

Are you going to change now or have you changed  
previously without using the app?

I am going to change now  ②  
I have changed previously   
without using the app (e.g.  
during the night)

---

{ "CNGnowprev": { "N": ③  
"BAGCNG", "P":  
"BAGCNGPREV" } }

---

**Production Germany 14. Jan. 2020: Primary matrix**

**Folder: Product change TP2**

**Form: Time for performing change of bag**

**Generated On: 30 Sep 2020 12:31:31**

---

| Field Name                          | Data Type | Units | Values                                                                                                      | Pre-Filled Values | Include Field OID |
|-------------------------------------|-----------|-------|-------------------------------------------------------------------------------------------------------------|-------------------|-------------------|
| ① Product sequence number           | 3         |       |                                                                                                             |                   | PRODSEQUENCE      |
| ② Time for performing chance of bag | \$1       |       | N = I am going to change now<br>P = I have changed previously without using the app (e.g. during the night) |                   | CHANGETIME_BAG    |
| ③ HIDDEN                            | \$100     |       | {<br>"CNGnowpr<br>ev": {<br>"N":<br>"BAGCNG",<br>"P":<br>"BAGCNGPR<br>EV" } }                               |                   | HIDDEN            |

---

**Production Germany 14. Jan. 2020: Primary matrix**  
**Folder: Product change TP2**  
**Form: Bag change previously**  
**Generated On: 30 Sep 2020 12:31:31**

---

Product sequence number

①

---

When did you change the bag (approximately)?

②

**Production Germany 14. Jan. 2020: Primary matrix**  
**Folder: Product change TP2**  
**Form: Bag change previously**  
**Generated On: 30 Sep 2020 12:31:31**

---

| Field Name                    | Data Type            | Units | Values | Pre-Filled Values | Include Field OID |
|-------------------------------|----------------------|-------|--------|-------------------|-------------------|
| ① Product sequence number     | 3                    |       |        |                   | PRODSEQUENCE      |
| ② When did you change the bag | dd MMM<br>yyyy HH:nn |       |        |                   | CNGPREVDT         |

---

**Production Germany 14. Jan. 2020: Primary matrix**  
**Folder: Product change TP2**  
**Form: Bag change**  
**Generated On: 30 Sep 2020 12:31:31**

---

Product sequence number \_\_\_\_\_ ①

---

Photo of the baseplate on the skin \_\_\_\_\_ ②

---

Baseplate on skin photo file name \_\_\_\_\_ ③

---

Baseplate on skin photo date and time \_\_\_\_\_ ④

---

**Production Germany 14. Jan. 2020: Primary matrix**

**Folder: Product change TP2**

**Form: Bag change**

**Generated On: 30 Sep 2020 12:31:31**

---

| Field Name                            | Data Type            | Units | Values | Pre-Filled Values | Include Field OID  |
|---------------------------------------|----------------------|-------|--------|-------------------|--------------------|
| ① Product sequence number             | 3                    |       |        |                   | PRODSEQUENCE       |
| ② Photo of the1 baseplate on the skin |                      |       |        |                   | PHOTO_BP<br>ONSKIN |
| ③ Photo file name                     | \$100                |       |        |                   | BPONSKIN_<br>PHOTO |
| ④ Baseplate on skin photo             | dd MMM<br>yyyy HH:nn |       |        |                   | PHT03DTC           |

---

**Production Germany 14. Jan. 2020: Primary matrix**  
**Folder: Product change TP2**  
**Form: Time for performing change of BP**  
**Generated On: 30 Sep 2020 12:31:31**

---

Product sequence number

\_\_\_\_\_ **1**

---

Are you going to change now or have you changed previously?

I am going to change now  **2**

I have changed previously   
without using the app (e.g.  
during the night)

---

\_\_\_\_\_ **3**

---

**Production Germany 14. Jan. 2020: Primary matrix**

**Folder: Product change TP2**

**Form: Time for performing change of BP**

**Generated On: 30 Sep 2020 12:31:31**

|   | Field Name                              | Data Type | Units | Values                                                                                                      | Pre-Filled Values                                                              | Include Field OID |
|---|-----------------------------------------|-----------|-------|-------------------------------------------------------------------------------------------------------------|--------------------------------------------------------------------------------|-------------------|
| ① | Product sequence number                 | 3         |       |                                                                                                             |                                                                                | PRODSEQUENCE      |
| ② | Time for performing change of baseplate | \$1       |       | N = I am going to change now<br>P = I have changed previously without using the app (e.g. during the night) |                                                                                | CHANGETIME_BP     |
| ③ | HIDDEN                                  | \$100     |       | {<br>"CNGnowpr<br>ev": {<br>"N":<br>"BPCNG",<br>"P":<br>"BPCNGPRE<br>V" } }                                 | 1: {<br>"CNGnowpr<br>ev": {<br>"N":<br>"BPCNG",<br>"P":<br>"BPCNGPRE<br>V" } } | HIDDEN            |



**Production Germany 14. Jan. 2020: Primary matrix**  
**Folder: Product change TP2**  
**Form: Baseplate change previously**  
**Generated On: 30 Sep 2020 12:31:31**

---

Product sequence number \_\_\_\_\_ ①

---

When did you change the product (approximately)? \_\_\_\_\_ ②

---

**Production Germany 14. Jan. 2020: Primary matrix**  
**Folder: Product change TP2**  
**Form: Baseplate change previously**  
**Generated On: 30 Sep 2020 12:31:31**

---

| Field Name                  | Data Type            | Units | Values | Pre-Filled Values | Include Field OID |
|-----------------------------|----------------------|-------|--------|-------------------|-------------------|
| ① Product sequence number   | 3                    |       |        |                   | PRODSEQUENCE      |
| ② Product change previously | dd MMM<br>yyyy HH:nn |       |        |                   | CNGPREVDTTC       |

---

**Production Germany 14. Jan. 2020: Primary matrix**

**Folder: Product change TP2**

**Form: Baseplate change TP 1**

**Generated On: 30 Sep 2020 12:31:31**

---

Product sequence number \_\_\_\_\_ ①

---

Photo of the stoma \_\_\_\_\_ ②

---

Stoma photo file name \_\_\_\_\_ ③

---

Stoma photo date and time \_\_\_\_\_ ④

---

Photo of the product \_\_\_\_\_ ⑤

---

Product photo file name \_\_\_\_\_ ⑥

---

Product photo date and time \_\_\_\_\_ ⑦

---

Do you experience any bleeding from the skin around your stoma right now when changing your product? Not experiencing  ⑧  
Experiencing

---

Once you have cleaned and dried the skin, do you still experience any weeping or moisture on the skin around your stoma right now when changing your product? Not experiencing  ⑨  
Experiencing

---

Are you experiencing any ulcers or sores around your stoma right now when changing your product? Not experiencing  ⑩  
Experiencing

---

How much of the time have you experienced any itching around your stoma since you last changed your product? None of the time  ⑪  
A little of the time   
Some of the time   
A lot of the time   
All of the time

Production Germany 14. Jan. 2020: Primary matrix  
Folder: Product change TP2  
Form: Baseplate change TP 1  
Generated On: 30 Sep 2020 12:31:31

---

Please rate on a scale from 0-10 how itchy the skin around your stoma has been at its worst since you last changed your product

- 0 No itchy  12
  - 1 Very mild itchy
  - 2
  - 3
  - 4
  - 5
  - 6
  - 7
  - 8
  - 9
  - 10 Worst possible peristomal skin itchy
- 

How much of the time have you experienced any pain around your stoma since you last changed your product?

- None of the time  13
  - A little of the time
  - Some of the time
  - A lot of the time
  - All of the time
- 

Please rate on a scale from 0-10 how painful the skin around your stoma has been at its worst since you last changed your product

- 0 No pain  14
  - 1 Very mild pain
  - 2
  - 3
  - 4
  - 5
  - 6
  - 7
  - 8
  - 9
  - 10 Worst possible peristomal skin pain
-

Production Germany 14. Jan. 2020: Primary matrix  
Folder: Product change TP2  
Form: Baseplate change TP 1  
Generated On: 30 Sep 2020 12:31:31

---

How much of the time have you experienced any burning feelings from the skin around your stoma since you last changed your product?

- None of the time  15
  - A little of the time
  - Some of the time
  - A lot of the time
  - All of the time
- 

Please rate on a scale from 0-10 any burning feelings from the skin around your stoma at its worst since you last changed your product

- 0 No burning  16
  - 1 Very mild burning
  - 2
  - 3
  - 4
  - 5
  - 6
  - 7
  - 8
  - 9
  - 10 Worst possible peristomal skin burning
- 

How would you rate on a scale of 0-10 your overall physical discomfort from the skin around your stoma since you last changed your product?

- 0 No discomfort  17
  - 1
  - 2
  - 3
  - 4
  - 5
  - 6
  - 7
  - 8
  - 9
  - 10 A lot of discomfort
-

On a scale of 0-10, how much have skin complications around your stoma caused you difficulty in your overall ability to move around since you last changed your product? For example, bending or walking

No skin complications  18

0 No difficulty

1

2

3

4

5

6

7

8

9

10 A lot of difficulty

---

On a scale of 0-10, how much have skin complications around your stoma caused you difficulty in your overall ability to stick the stoma bag adhesive to your skin since you last changed your product?

No skin complications  19

0 No difficulty

1

2

3

4

5

6

7

8

9

10 A lot of difficulty

---

What was the main reason for change of the baseplate? \_\_\_\_\_  20

---

I followed my usual changing pattern \_\_\_\_\_  21

---

**Production Germany 14. Jan. 2020: Primary matrix**  
**Folder: Product change TP2**  
**Form: Baseplate change TP 1**  
**Generated On: 30 Sep 2020 12:31:31**

- 
- I thought it would be nice with a clean product \_\_\_\_\_ (22)
- 
- In preparation of an activity (i.e. going out, doing sports, travelling) \_\_\_\_\_ (23)
- 
- The entire baseplate had become detached \_\_\_\_\_ (24)
- 
- The outer edge of the baseplate had become detached \_\_\_\_\_ (25)
- 
- The center of the baseplate had become detached \_\_\_\_\_ (26)
- 
- I was afraid the baseplate would become detached \_\_\_\_\_ (27)
- 
- The area around the stoma was itching \_\_\_\_\_ (28)
- 
- The area around the stoma was painful \_\_\_\_\_ (29)
- 
- There was leakage underneath and outside the baseplate \_\_\_\_\_ (30)
- 
- There was leakage underneath the baseplate (but not outside the baseplate) \_\_\_\_\_ (31)
- 
- The bag was full of air (ballooning) \_\_\_\_\_ (32)
- 
- There was a vacuum in the bag (pancaking) \_\_\_\_\_ (33)
- 
- Due to visit in the investigation \_\_\_\_\_ (34)
- 
- Other reason \_\_\_\_\_ (35)
- 
-

**Production Germany 14. Jan. 2020: Primary matrix**  
**Folder: Product change TP2**  
**Form: Baseplate change TP 1**  
**Generated On: 30 Sep 2020 12:31:31**

---

If other reason for change is selected, please specify \_\_\_\_\_ **36**

---

Did you experience leakage outside the baseplate (i.e. soiling the clothes)?

No  **37**  
Yes

---

Did you experience the bag becoming overfilled with air during use (ballooning)?

Not at all  **38**  
A little   
Some   
Much   
Very much

---

Which stoma accessories did you use?

---

None \_\_\_\_\_ **40**

---

Adhesive remover \_\_\_\_\_ **41**

---

Paste \_\_\_\_\_ **42**

---

Rings \_\_\_\_\_ **43**

---

Ostomy tape \_\_\_\_\_ **44**

---

Ostomy belt \_\_\_\_\_ **45**

---

Hernia belt \_\_\_\_\_ **46**

---

Stoma powder \_\_\_\_\_ **47**

---

---



**Production Germany 14. Jan. 2020: Primary matrix**  
**Folder: Product change TP2**  
**Form: Baseplate change TP 1**  
**Generated On: 30 Sep 2020 12:31:31**

---

|                                 |       |    |
|---------------------------------|-------|----|
| Barrier lotion                  | _____ | 48 |
| Barrier cream                   | _____ | 49 |
| Barrier spray                   | _____ | 50 |
| Barrier wipes                   | _____ | 51 |
| Cleansing wipes/cleansing spray | _____ | 52 |
| Odour remover                   | _____ | 53 |
| Other accessories               | _____ | 54 |
| If 'Other' please specify:      | _____ | 55 |

---

**Production Germany 14. Jan. 2020: Primary matrix**

**Folder: Product change TP2**

**Form: Baseplate change TP 1**

**Generated On: 30 Sep 2020 12:31:31**

|   | Field Name                  | Data Type            | Units | Values                                   | Pre-Filled Values | Include Field OID |
|---|-----------------------------|----------------------|-------|------------------------------------------|-------------------|-------------------|
| ① | Product sequence number     | 3                    |       |                                          |                   | PRODSEQUENCE      |
| ② | Photo of the stoma          | 1                    |       |                                          |                   | PHOTO_SKIN        |
| ③ | Stoma photo name            | \$100                |       |                                          |                   | PHT0101           |
| ④ | Stoma photo date and time   | dd MMM<br>yyyy HH:nn |       |                                          |                   | PHT01DTC          |
| ⑤ | Photo of the product        | 1                    |       |                                          |                   | PHOTO_PRODUCT     |
| ⑥ | Product photo name          | \$100                |       |                                          |                   | PROD_PHOTO        |
| ⑦ | Product photo date and time | dd MMM<br>yyyy HH:nn |       |                                          |                   | PHT02DTC          |
| ⑧ | Ostomy Skin Tool 1          | 1                    |       | 0 = Not experiencing<br>1 = Experiencing |                   | OST_1             |

**Production Germany 14. Jan. 2020: Primary matrix**

**Folder: Product change TP2**

**Form: Baseplate change TP 1**

**Generated On: 30 Sep 2020 12:31:31**

| Field Name            | Data Type | Units | Values                                                                                                                   | Pre-Filled Values | Include Field OID |
|-----------------------|-----------|-------|--------------------------------------------------------------------------------------------------------------------------|-------------------|-------------------|
| 9 Ostomy Skin Tool 2  | 1         |       | 0 = Not experiencing<br>1 = Experiencing                                                                                 |                   | OST_2             |
| 10 Ostomy Skin Tool 3 | 1         |       | 0 = Not experiencing<br>1 = Experiencing                                                                                 |                   | OST_3             |
| 11 Ostomy Skin Tool 4 | 1         |       | 1 = None of the time<br>2 = A little of the time<br>3 = Some of the time<br>4 = A lot of the time<br>5 = All of the time |                   | OST_4             |
| 12 Ostomy Skin Tool 5 | 2         |       | 0 = 0 No itch<br>1 = 1 Very mild itch<br>2 = 2<br>3 = 3<br>4 = 4<br>5 = 5<br>6 = 6<br>7 = 7                              |                   | LONGSCALE_OST_5   |

**Production Germany 14. Jan. 2020: Primary matrix**  
**Folder: Product change TP2**  
**Form: Baseplate change TP 1**  
**Generated On: 30 Sep 2020 12:31:31**

| Field Name                                                                                             | Data Type | Units | Values                                                                                                                                                          | Pre-Filled Values | Include Field OID |
|--------------------------------------------------------------------------------------------------------|-----------|-------|-----------------------------------------------------------------------------------------------------------------------------------------------------------------|-------------------|-------------------|
|                                                                                                        |           |       | 8 = 8<br>9 = 9<br>10 = 10<br>Worst possible peristomal skin itch                                                                                                |                   |                   |
|  Ostomy Skin Tool 6   |           | 1     | 1 = None of the time<br>2 = A little of the time<br>3 = Some of the time<br>4 = A lot of the time<br>5 = All of the time                                        |                   | OST_6             |
|  Ostomy Skin Tool 7 |           | 2     | 0 = 0 No pain<br>1 = 1 Very mild pain<br>2 = 2<br>3 = 3<br>4 = 4<br>5 = 5<br>6 = 6<br>7 = 7<br>8 = 8<br>9 = 9<br>10 = 10<br>Worst possible peristomal skin pain |                   | LONGSCALE_OST_7   |

**Production Germany 14. Jan. 2020: Primary matrix**

**Folder: Product change TP2**

**Form: Baseplate change TP 1**

**Generated On: 30 Sep 2020 12:31:31**

| Field Name             | Data Type | Units | Values                                                                                                                                                                | Pre-Filled Values | Include Field OID |
|------------------------|-----------|-------|-----------------------------------------------------------------------------------------------------------------------------------------------------------------------|-------------------|-------------------|
| 15 Ostomy Skin Tool 8  | 1         |       | 1 = None of the time<br>2 = A little of the time<br>3 = Some of the time<br>4 = A lot of the time<br>5 = All of the time                                              |                   | OST_8             |
| 16 Ostomy Skin Tool 9  | 2         |       | 0 = 0 No burning<br>1 = 1 Very mild burning<br>2 = 2<br>3 = 3<br>4 = 4<br>5 = 5<br>6 = 6<br>7 = 7<br>8 = 8<br>9 = 9<br>10 = 10 Worst possible peristomal skin burning |                   | LONGSCALE_OST_9   |
| 17 Ostomy Skin Tool 10 | 2         |       | 0 = 0 No discomfort<br>1 = 1<br>2 = 2<br>3 = 3<br>4 = 4                                                                                                               |                   | LONGSCALE_OST_10  |

**Production Germany 14. Jan. 2020: Primary matrix**

**Folder: Product change TP2**

**Form: Baseplate change TP 1**

**Generated On: 30 Sep 2020 12:31:31**

| Field Name                                                                                              | Data Type | Units | Values                                                                                                                                                               | Pre-Filled Values | Include Field OID    |
|---------------------------------------------------------------------------------------------------------|-----------|-------|----------------------------------------------------------------------------------------------------------------------------------------------------------------------|-------------------|----------------------|
|                                                                                                         |           |       | 5 = 5<br>6 = 6<br>7 = 7<br>8 = 8<br>9 = 9<br>10 = 10 A<br>lot of discomfort                                                                                          |                   |                      |
|  Ostomy Skin Tool 11   | 2         |       | 99 = No skin complications<br>0 = 0 No difficulty<br>1 = 1<br>2 = 2<br>3 = 3<br>4 = 4<br>5 = 5<br>6 = 6<br>7 = 7<br>8 = 8<br>9 = 9<br>10 = 10 A<br>lot of difficulty |                   | LONGSCALE<br>_OST_11 |
|  Ostomy Skin Tool 12 | 2         |       | 99 = No skin complications<br>0 = 0 No difficulty<br>1 = 1<br>2 = 2                                                                                                  |                   | LONGSCALE<br>_OST_12 |

**Production Germany 14. Jan. 2020: Primary matrix**

**Folder: Product change TP2**

**Form: Baseplate change TP 1**

**Generated On: 30 Sep 2020 12:31:31**

| Field Name | Data Type               | Units | Values                                                                                           | Pre-Filled Values | Include Field OID |
|------------|-------------------------|-------|--------------------------------------------------------------------------------------------------|-------------------|-------------------|
|            |                         |       | 3 = 3<br>4 = 4<br>5 = 5<br>6 = 6<br>7 = 7<br>8 = 8<br>9 = 9<br>10 = 10 A<br>lot of<br>difficulty |                   |                   |
| 20         | MULTI_CNG1_HEADER       |       |                                                                                                  |                   | MULTI_CNG_HEADER  |
| 21         | Reason for change no. 1 | 1     |                                                                                                  |                   | MULTI_CNG_1       |
| 22         | Reason for change no. 2 | 2     |                                                                                                  |                   | MULTI_CNG_2       |
| 23         | Reason for change no. 3 | 3     |                                                                                                  |                   | MULTI_CNG_3       |
| 24         | Reason for change no. 4 | 4     |                                                                                                  |                   | MULTI_CNG_4       |

**Production Germany 14. Jan. 2020: Primary matrix**

**Folder: Product change TP2**

**Form: Baseplate change TP 1**

**Generated On: 30 Sep 2020 12:31:31**

| Field Name                  | Data Type | Units | Values | Pre-Filled Values | Include Field OID |
|-----------------------------|-----------|-------|--------|-------------------|-------------------|
| 25 Reason for change no. 5  | 1         |       |        |                   | MULTI_CNG_5       |
| 26 Reason for change no. 6  | 1         |       |        |                   | MULTI_CNG_6       |
| 27 Reason for change no. 7  | 1         |       |        |                   | MULTI_CNG_7       |
| 28 Reason for change no. 8  | 1         |       |        |                   | MULTI_CNG_8       |
| 29 Reason for change no. 9  | 1         |       |        |                   | MULTI_CNG_9       |
| 30 Reason for change no. 10 | 1         |       |        |                   | MULTI_CNG_10      |
| 31 Reason for change no. 11 | 1         |       |        |                   | MULTI_CNG_11      |
| 32 Reason for change no. 12 | 1         |       |        |                   | MULTI_CNG_12      |



**Production Germany 14. Jan. 2020: Primary matrix**

**Folder: Product change TP2**

**Form: Baseplate change TP 1**

**Generated On: 30 Sep 2020 12:31:31**

| Field Name                                | Data Type | Units | Values                                                                  | Pre-Filled Values | Include Field OID |
|-------------------------------------------|-----------|-------|-------------------------------------------------------------------------|-------------------|-------------------|
| 33 Reason for change no. 13               | 1         |       |                                                                         |                   | MULTI_CNG_13      |
| 34 Reason for change no. 14               | 1         |       |                                                                         |                   | MULTI_CNG_14      |
| 35 Reason for change no. 15               | 1         |       |                                                                         |                   | MULTI_CNG_15      |
| 36 Description of other reason for change | \$100     |       |                                                                         |                   | MULTI_CNG_OTHER   |
| 37 Leakage outside                        | 1         |       | 0 = No<br>1 = Yes                                                       |                   | LEAKAGE_OUTSIDE   |
| 38 Degree of ballooning                   | 1         |       | 1 = Not at all<br>2 = A little<br>3 = Some<br>4 = Much<br>5 = Very much |                   | BALLOONING_DEGREE |
| 40 Accessories 1                          | 1         |       |                                                                         |                   | MULTI_ACC_1       |

**Production Germany 14. Jan. 2020: Primary matrix**  
**Folder: Product change TP2**  
**Form: Baseplate change TP 1**  
**Generated On: 30 Sep 2020 12:31:31**

| Field Name             | Data Type | Units | Values | Pre-Filled Values | Include Field OID |
|------------------------|-----------|-------|--------|-------------------|-------------------|
| 41 Accessories 1<br>2  |           |       |        |                   | MULTI_ACC<br>_2   |
| 42 Accessories 1<br>3  |           |       |        |                   | MULTI_ACC<br>_3   |
| 43 Accessories 1<br>4  |           |       |        |                   | MULTI_ACC<br>_4   |
| 44 Accessories 1<br>5  |           |       |        |                   | MULTI_ACC<br>_5   |
| 45 Accessories 1<br>6  |           |       |        |                   | MULTI_ACC<br>_6   |
| 46 Accessories 1<br>7  |           |       |        |                   | MULTI_ACC<br>_7   |
| 47 Accessories 1<br>8  |           |       |        |                   | MULTI_ACC<br>_8   |
| 48 Accessories 1<br>9  |           |       |        |                   | MULTI_ACC<br>_9   |
| 49 Accessories 1<br>10 |           |       |        |                   | MULTI_ACC<br>_10  |
| 50 Accessories 1<br>11 |           |       |        |                   | MULTI_ACC<br>_11  |

**Production Germany 14. Jan. 2020: Primary matrix**  
**Folder: Product change TP2**  
**Form: Baseplate change TP 1**  
**Generated On: 30 Sep 2020 12:31:31**

| Field Name                   | Data Type | Units | Values | Pre-Filled Values | Include Field OID   |
|------------------------------|-----------|-------|--------|-------------------|---------------------|
| 51 Accessories 1<br>12       |           |       |        |                   | MULTI_ACC<br>_12    |
| 52 Accessories 1<br>13       |           |       |        |                   | MULTI_ACC<br>_13    |
| 53 Accessories 1<br>14       |           |       |        |                   | MULTI_ACC<br>_14    |
| 54 Accessories 1<br>15       |           |       |        |                   | MULTI_ACC<br>_15    |
| 55 Accessories \$50<br>other |           |       |        |                   | MULTI_ACC<br>_OTHER |

Do you have any skin complications around your stoma today?

No  ①  
Yes

---

If yes, how would you describe the skin complications around your stoma today?

No skin complications  ②  
Very mild   
Mild   
Moderate   
Severe   
Very severe

---

How often have you experienced itchy skin around your stoma in the past 14 days?

None of the time  ③  
A little of the time   
Some of the time   
A lot of the time   
All of the time

---

How often have you experienced any pain in the skin around the stoma in the past 14 days?

None of the time  ④  
A little of the time   
Some of the time   
A lot of the time   
All of the time

---

How often have you experienced burning feelings in the skin around your stoma in the past 14 days?

None of the time  ⑤  
A little of the time   
Some of the time   
A lot of the time   
All of the time

---

Compared to the beginning of this test period (Test Period 2) how have any skin complications around your stoma changed?

- Very much improved  6  
Much improved   
A little improved   
No change   
A little worse   
Much worse   
Very much worse
- 

Did your stoma behave differently from normal since your last visit/call?

- No  7  
Yes
- 

If yes, please describe \_\_\_\_\_ 8

---

Emotional impact. In the last seven days, due to leakage or worry about leakage... (please tick the box to continue) \_\_\_\_\_ 9

---

I felt panic

- All of the time  10  
Often   
Sometimes   
Rarely or never
- 

I felt stressed out

- All of the time  11  
Often   
Sometimes   
Rarely or never
- 

I felt more afraid about leaks in the future

- All of the time  12  
Often
-

Sometimes   
Rarely or never

---

I felt worry

All of the time  13  
Often   
Sometimes   
Rarely or never

---

I felt frustrated

All of the time  14  
Often   
Sometimes   
Rarely or never

---

I felt embarrassed

All of the time  15  
Often   
Sometimes   
Rarely or never

---

I felt worried that I might leak

All of the time  16  
Often   
Sometimes   
Rarely or never

---

I couldn't sleep

All of the time  17  
Often   
Sometimes   
Rarely or never

---

Production Germany 14. Jan. 2020: Primary matrix

Folder: Final evaluation TP2

Form: Final evaluation TP 2

Generated On: 30 Sep 2020 12:31:31

---

I kept waking up at night to check my stoma

All of the time  18  
Often   
Sometimes   
Rarely or never

---

I kept checking my ostomy bag to see if I have leaked

All of the time  19  
Often   
Sometimes   
Rarely or never

---

Usual and social activities.  
In the last seven days due to leakage or worry about  
leakage...

20

---

I decided to stay at home

All of the time  21  
Often   
Sometimes   
Rarely or never   
Not applicable

---

I couldn't do light activities

All of the time  22  
Often   
Sometimes   
Rarely or never   
Not applicable

---

I changed my plans

All of the time  23  
Often   
Sometimes

Rarely or never   
Not applicable

---

I was unable to go out and meet family and friends

All of the time  24  
Often   
Sometimes   
Rarely or never   
Not applicable

---

I avoided close physical contact with family and friends

All of the time  25  
Often   
Sometimes   
Rarely or never   
Not applicable

---

I did not want to see people

All of the time  26  
Often   
Sometimes   
Rarely or never   
Not applicable

---

I avoided people

All of the time  27  
Often   
Sometimes   
Rarely or never   
Not applicable

---

I tried to avoid meeting new people

All of the time  28  
Often

---



Sometimes   
Rarely or never   
Not applicable

---

Coping and in control.  
In the last 7 days, due to leakage or worry about  
leakage...

---

29

I felt in control

All of the time  30  
Often   
Sometimes   
Rarely or never

---

I was able to cope

All of the time  31  
Often   
Sometimes   
Rarely or never

---

I felt calm

All of the time  32  
Often   
Sometimes   
Rarely or never

---

I saw my friends as I usually do

All of the time  33  
Often   
Sometimes   
Rarely or never

---

Discreetness. 34  
In the last seven days...

---

It was difficult to hide the stoma appliance under clothing 35

Strongly agree   
Slightly agree   
Neither agree nor disagree   
Slightly disagree   
Strongly disagree

---

I was self-conscious about the appearance of the stoma appliance 36

Strongly agree   
Slightly agree   
Neither agree nor disagree   
Slightly disagree   
Strongly disagree

---

The stoma appliance limited the choice of clothes that I could wear 37

Strongly agree   
Slightly agree   
Neither agree nor disagree   
Slightly disagree   
Strongly disagree

---

The stoma appliance was obvious to other people 38

Strongly agree   
Slightly agree   
Neither agree nor disagree   
Slightly disagree   
Strongly disagree

---

The color of the stoma appliance was discreet 39

Strongly agree   
Slightly agree

---

Production Germany 14. Jan. 2020: Primary matrix

Folder: Final evaluation TP2

Form: Final evaluation TP 2

Generated On: 30 Sep 2020 12:31:31

---

Neither agree nor disagree

Slightly disagree

Strongly disagree

---

It was difficult to hide the stoma appliance because of ballooning

Strongly agree  40

Slightly agree

Neither agree nor disagree

Slightly disagree

Strongly disagree

---

Comfort.  
In the last seven days...

41

---

The stoma appliance was comfortable to wear

Strongly agree  42

Slightly agree

Neither agree nor disagree

Slightly disagree

Strongly disagree

---

I was not concerned about skin irritation under the stoma appliance (for example feelings of burning, itching, pinching or pain)

Strongly agree  43

Slightly agree

Neither agree nor disagree

Slightly disagree

Strongly disagree

---

It was uncomfortable to remove the stoma appliance from my body

Strongly agree  44

Slightly agree

Neither agree nor disagree

Slightly disagree

Strongly disagree

---

I often forgot that I was wearing the stoma appliance

Strongly agree  45  
Slightly agree   
Neither agree nor disagree   
Slightly disagree   
Strongly disagree

---

The stoma appliance was comfortable as it fitted well to my body movements

Strongly agree  46  
Slightly agree   
Neither agree nor disagree   
Slightly disagree   
Strongly disagree

---

The stoma appliance disrupted my sleep during the night

Strongly agree  47  
Slightly agree   
Neither agree nor disagree   
Slightly disagree   
Strongly disagree

---

Confidence.  
In the last seven days...

48

---

I was confident that the stoma appliance would not leak

Strongly agree  49  
Slightly agree   
Neither agree nor disagree   
Slightly disagree   
Strongly disagree

---

**Production Germany 14. Jan. 2020: Primary matrix**

**Folder: Final evaluation TP2**

**Form: Final evaluation TP 2**

**Generated On: 30 Sep 2020 12:31:31**

---

I worried that the stoma appliance would become loose from my body

- Strongly agree  50
- Slightly agree
- Neither agree nor disagree
- Slightly disagree
- Strongly disagree
- 

I felt confident that I could spend the night away from home despite wearing the stoma appliance

- Strongly agree  51
- Slightly agree
- Neither agree nor disagree
- Slightly disagree
- Strongly disagree
- 

I was confident the stoma appliance would not cause any problems for me

- Strongly agree  52
- Slightly agree
- Neither agree nor disagree
- Slightly disagree
- Strongly disagree
- 

I felt confident to take part in physical activities (for example, sports) whilst wearing the stoma appliance

- Strongly agree  53
- Slightly agree
- Neither agree nor disagree
- Slightly disagree
- Strongly disagree
- 

I worried that the stoma appliance would make a rustling noise

- Strongly agree  54
- Slightly agree
- Neither agree nor disagree
- Slightly disagree
- Strongly disagree
-

Production Germany 14. Jan. 2020: Primary matrix

Folder: Final evaluation TP2

Form: Final evaluation TP 2

Generated On: 30 Sep 2020 12:31:31

---

Social life and relationships.  
In the last seven days...

55

---

I worried that my family and friends felt awkward around  
me because of the stoma appliance

- Strongly agree  56
- Slightly agree
- Neither agree nor disagree
- Slightly disagree
- Strongly disagree

---

I felt my social life had been restricted because of the  
stoma appliance

- Strongly agree  57
- Slightly agree
- Neither agree nor disagree
- Slightly disagree
- Strongly disagree

---

I avoided close physical contact with family and friends  
because of the stoma appliance

- Strongly agree  58
- Slightly agree
- Neither agree nor disagree
- Slightly disagree
- Strongly disagree

---

I worried about whether I could have a relationship  
because of my stoma appliance

- Strongly agree  59
- Slightly agree
- Neither agree nor disagree
- Slightly disagree
- Strongly disagree

---

I worried about whether the stoma appliance would  
affect my sex life

- Strongly agree  60
- Slightly agree

Production Germany 14. Jan. 2020: Primary matrix

Folder: Final evaluation TP2

Form: Final evaluation TP 2

Generated On: 30 Sep 2020 12:31:31

- 
- Neither agree nor disagree
  - Slightly disagree
  - Strongly disagree

---

How was the feeling of security while wearing the product?

- Very poor  61
- Poor
- Neither poor nor good
- Good
- Very good

---

How did you find cutting the baseplate?

- Very difficult  62
- Difficult
- Neither difficult nor easy
- Easy
- Very easy

---

How did you find applying the baseplate?

- Very difficult  63
- Difficult
- Neither difficult nor easy
- Easy
- Very easy

---

How did you find removing the baseplate?

- Very difficult  64
- Difficult
- Neither difficult nor easy
- Easy
- Very easy

---

Which product do you prefer?

65

Production Germany 14. Jan. 2020: Primary matrix  
Folder: Final evaluation TP2  
Form: Final evaluation TP 2  
Generated On: 30 Sep 2020 12:31:31

---

The product from the first test period

The product from the second test period

---

Why do you prefer this product over the other? (you may tick more than one box)

---

Less leakage \_\_\_\_\_ **67**

---

Better feeling of security \_\_\_\_\_ **68**

---

Better comfort \_\_\_\_\_ **69**

---

Better discretion \_\_\_\_\_ **70**

---

Less pancaking \_\_\_\_\_ **71**

---

Less ballooning \_\_\_\_\_ **72**

---

Better skin condition \_\_\_\_\_ **73**

---

Better ability to fit and follow the body \_\_\_\_\_ **74**

---

Other reason \_\_\_\_\_ **75**

---

Which product do you prefer? \_\_\_\_\_ **76**

The product from the first test period

The product from the second test period

Your own product

---

---



**Production Germany 14. Jan. 2020: Primary matrix**  
**Folder: Final evaluation TP2**  
**Form: Final evaluation TP 2**  
**Generated On: 30 Sep 2020 12:31:31**

---

Why do you prefer this product over the other? (you may tick more than one box)

---

Less leakage \_\_\_\_\_ (78)

---

Better feeling of security \_\_\_\_\_ (79)

---

Better comfort \_\_\_\_\_ (80)

---

Better discretion \_\_\_\_\_ (81)

---

Less pancaking \_\_\_\_\_ (82)

---

Less ballooning \_\_\_\_\_ (83)

---

Better skin condition \_\_\_\_\_ (84)

---

Better ability to fit and follow the body \_\_\_\_\_ (85)

---

Other reason \_\_\_\_\_ (86)

---

**Production Germany 14. Jan. 2020: Primary matrix**

**Folder: Final evaluation TP2**

**Form: Final evaluation TP 2**

**Generated On: 30 Sep 2020 12:31:31**

| Field Name                  | Data Type | Units | Values                                                                                                                   | Pre-Filled Values | Include Field OID |
|-----------------------------|-----------|-------|--------------------------------------------------------------------------------------------------------------------------|-------------------|-------------------|
| ① Complications today       | 1         |       | 0 = No<br>1 = Yes                                                                                                        |                   | COMP_TODAY        |
| ② Severity of complications | 1         |       | 0 = No skin complications<br>1 = Very mild<br>2 = Mild<br>3 = Moderate<br>4 = Severe<br>5 = Very severe                  |                   | COMP_IF_YES       |
| ③ Itching in 14 days        | 1         |       | 1 = None of the time<br>2 = A little of the time<br>3 = Some of the time<br>4 = A lot of the time<br>5 = All of the time |                   | ITCHING_14DAYS    |
| ④ Pain in 14 days           | 1         |       | 1 = None of the time<br>2 = A little of the time<br>3 = Some of the time<br>4 = A lot of the time                        |                   | PAIN_14DAYS       |

**Production Germany 14. Jan. 2020: Primary matrix**  
**Folder: Final evaluation TP2**  
**Form: Final evaluation TP 2**  
**Generated On: 30 Sep 2020 12:31:31**

| Field Name               | Data Type | Units | Values                                                                                                                                               | Pre-Filled Values | Include Field OID |
|--------------------------|-----------|-------|------------------------------------------------------------------------------------------------------------------------------------------------------|-------------------|-------------------|
|                          |           |       | 5 = All of the time                                                                                                                                  |                   |                   |
| ⑤ Burning in 14 days     | 1         |       | 1 = None of the time<br>2 = A little of the time<br>3 = Some of the time<br>4 = A lot of the time<br>5 = All of the time                             |                   | BURNING_14DAYS    |
| ⑥ Own comparison of skin | 1         |       | 1 = Very much improved<br>2 = Much improved<br>3 = A little improved<br>4 = No change<br>5 = A little worse<br>6 = Much worse<br>7 = Very much worse |                   | COMPARE_OWN       |
| ⑦ Stoma behaviour        | 1         |       | 0 = No<br>1 = Yes                                                                                                                                    |                   | STOMABEHAVE_YN    |

**Production Germany 14. Jan. 2020: Primary matrix**

**Folder: Final evaluation TP2**

**Form: Final evaluation TP 2**

**Generated On: 30 Sep 2020 12:31:31**

| Field Name                  | Data Type | Units | Values                                                                   | Pre-Filled Values | Include Field OID |
|-----------------------------|-----------|-------|--------------------------------------------------------------------------|-------------------|-------------------|
| 8 Different stoma behaviour | \$200     |       |                                                                          |                   | BEHAVE_IF_YES     |
| 9 LEAKAGE_H1 EADER          |           |       |                                                                          |                   | LEAKAGE_H EADER   |
| 10 LEAKAGE_Q1 S_1           |           |       | 0 = All of the time<br>1 = Often<br>2 = Sometimes<br>3 = Rarely or never |                   | LEAKAGE_Q S_1     |
| 11 LEAKAGE_Q1 S_2           |           |       | 0 = All of the time<br>1 = Often<br>2 = Sometimes<br>3 = Rarely or never |                   | LEAKAGE_Q S_2     |
| 12 LEAKAGE_Q1 S_3           |           |       | 0 = All of the time<br>1 = Often<br>2 = Sometimes<br>3 = Rarely or never |                   | LEAKAGE_Q S_3     |
| 13 LEAKAGE_Q1 S_4           |           |       | 0 = All of the time                                                      |                   | LEAKAGE_Q S_4     |

**Production Germany 14. Jan. 2020: Primary matrix**

**Folder: Final evaluation TP2**

**Form: Final evaluation TP 2**

**Generated On: 30 Sep 2020 12:31:31**

| Field Name           | Data Type | Units | Values                                                                            | Pre-Filled Values | Include Field OID |
|----------------------|-----------|-------|-----------------------------------------------------------------------------------|-------------------|-------------------|
|                      |           |       | 1 = Often<br>2 =<br>Sometimes<br>3 = Rarely<br>or never                           |                   |                   |
| 14 LEAKAGE_Q1<br>S_5 |           |       | 0 = All of<br>the time<br>1 = Often<br>2 =<br>Sometimes<br>3 = Rarely<br>or never |                   | LEAKAGE_Q<br>S_5  |
| 15 LEAKAGE_Q1<br>S_6 |           |       | 0 = All of<br>the time<br>1 = Often<br>2 =<br>Sometimes<br>3 = Rarely<br>or never |                   | LEAKAGE_Q<br>S_6  |
| 16 LEAKAGE_Q1<br>S_7 |           |       | 0 = All of<br>the time<br>1 = Often<br>2 =<br>Sometimes<br>3 = Rarely<br>or never |                   | LEAKAGE_Q<br>S_7  |
| 17 LEAKAGE_Q1<br>S_8 |           |       | 0 = All of<br>the time<br>1 = Often                                               |                   | LEAKAGE_Q<br>S_8  |

**Production Germany 14. Jan. 2020: Primary matrix**

**Folder: Final evaluation TP2**

**Form: Final evaluation TP 2**

**Generated On: 30 Sep 2020 12:31:31**

| Field Name              | Data Type | Units | Values                                                                                                     | Pre-Filled Values | Include Field OID   |
|-------------------------|-----------|-------|------------------------------------------------------------------------------------------------------------|-------------------|---------------------|
|                         |           |       | 2 =<br>Sometimes<br>3 = Rarely<br>or never                                                                 |                   |                     |
| 18 LEAKAGE_Q1<br>S_9    |           |       | 0 = All of<br>the time<br>1 = Often<br>2 =<br>Sometimes<br>3 = Rarely<br>or never                          |                   | LEAKAGE_Q<br>S_9    |
| 19 LEAKAGE_Q1<br>S_10   |           |       | 0 = All of<br>the time<br>1 = Often<br>2 =<br>Sometimes<br>3 = Rarely<br>or never                          |                   | LEAKAGE_Q<br>S_10   |
| 20 LEAKAGE_H1<br>EADER2 |           |       |                                                                                                            |                   | LEAKAGE_H<br>EADER2 |
| 21 LEAKAGE_Q1<br>S_11   |           |       | 0 = All of<br>the time<br>1 = Often<br>2 =<br>Sometimes<br>3 = Rarely<br>or never<br>9 = Not<br>applicable |                   | LEAKAGE_Q<br>S_11   |

**Production Germany 14. Jan. 2020: Primary matrix**

**Folder: Final evaluation TP2**

**Form: Final evaluation TP 2**

**Generated On: 30 Sep 2020 12:31:31**

| Field Name            | Data Type | Units | Values                                                                                         | Pre-Filled Values | Include Field OID |
|-----------------------|-----------|-------|------------------------------------------------------------------------------------------------|-------------------|-------------------|
| 22 LEAKAGE_Q1<br>S_12 |           |       | 0 = All of the time<br>1 = Often<br>2 = Sometimes<br>3 = Rarely or never<br>9 = Not applicable |                   | LEAKAGE_Q<br>S_12 |
| 23 LEAKAGE_Q1<br>S_13 |           |       | 0 = All of the time<br>1 = Often<br>2 = Sometimes<br>3 = Rarely or never<br>9 = Not applicable |                   | LEAKAGE_Q<br>S_13 |
| 24 LEAKAGE_Q1<br>S_14 |           |       | 0 = All of the time<br>1 = Often<br>2 = Sometimes<br>3 = Rarely or never<br>9 = Not applicable |                   | LEAKAGE_Q<br>S_14 |
| 25 LEAKAGE_Q1<br>S_15 |           |       | 0 = All of the time<br>1 = Often<br>2 = Sometimes                                              |                   | LEAKAGE_Q<br>S_15 |

**Production Germany 14. Jan. 2020: Primary matrix**  
**Folder: Final evaluation TP2**  
**Form: Final evaluation TP 2**  
**Generated On: 30 Sep 2020 12:31:31**

| Field Name            | Data Type | Units | Values                                                                                         | Pre-Filled Values | Include Field OID |
|-----------------------|-----------|-------|------------------------------------------------------------------------------------------------|-------------------|-------------------|
|                       |           |       | 3 = Rarely or never<br>9 = Not applicable                                                      |                   |                   |
| 26 LEAKAGE_Q1<br>S_16 |           |       | 0 = All of the time<br>1 = Often<br>2 = Sometimes<br>3 = Rarely or never<br>9 = Not applicable |                   | LEAKAGE_Q<br>S_16 |
| 27 LEAKAGE_Q1<br>S_17 |           |       | 0 = All of the time<br>1 = Often<br>2 = Sometimes<br>3 = Rarely or never<br>9 = Not applicable |                   | LEAKAGE_Q<br>S_17 |
| 28 LEAKAGE_Q1<br>S_18 |           |       | 0 = All of the time<br>1 = Often<br>2 = Sometimes<br>3 = Rarely or never<br>9 = Not applicable |                   | LEAKAGE_Q<br>S_18 |



Production Germany 14. Jan. 2020: Primary matrix

Folder: Final evaluation TP2

Form: Final evaluation TP 2

Generated On: 30 Sep 2020 12:31:31

| Field Name              | Data Type | Units | Values                                                                            | Pre-Filled Values | Include Field OID   |
|-------------------------|-----------|-------|-----------------------------------------------------------------------------------|-------------------|---------------------|
| 39 LEAKAGE_H1<br>EADER3 |           |       |                                                                                   |                   | LEAKAGE_H<br>EADER3 |
| 30 LEAKAGE_Q1<br>S_19   |           |       | 0 = All of<br>the time<br>1 = Often<br>2 =<br>Sometimes<br>3 = Rarely<br>or never |                   | LEAKAGE_Q<br>S_19   |
| 31 LEAKAGE_Q1<br>S_20   |           |       | 0 = All of<br>the time<br>1 = Often<br>2 =<br>Sometimes<br>3 = Rarely<br>or never |                   | LEAKAGE_Q<br>S_20   |
| 32 LEAKAGE_Q1<br>S_21   |           |       | 0 = All of<br>the time<br>1 = Often<br>2 =<br>Sometimes<br>3 = Rarely<br>or never |                   | LEAKAGE_Q<br>S_21   |
| 33 LEAKAGE_Q1<br>S_22   |           |       | 0 = All of<br>the time<br>1 = Often<br>2 =<br>Sometimes<br>3 = Rarely<br>or never |                   | LEAKAGE_Q<br>S_22   |

**Production Germany 14. Jan. 2020: Primary matrix**  
**Folder: Final evaluation TP2**  
**Form: Final evaluation TP 2**  
**Generated On: 30 Sep 2020 12:31:31**

| Field Name  | Data Type | Units | Values                                                                                                                       | Pre-Filled Values | Include Field OID |
|-------------|-----------|-------|------------------------------------------------------------------------------------------------------------------------------|-------------------|-------------------|
| 34 QOLH1    | 1         |       |                                                                                                                              |                   | QOLH1             |
| 35 QOL_QS_1 | 1         |       | 1 = Strongly agree<br>2 = Slightly agree<br>3 = Neither agree nor disagree<br>4 = Slightly disagree<br>5 = Strongly disagree |                   | QOL_QS_1          |
| 36 QOL_QS_2 | 1         |       | 1 = Strongly agree<br>2 = Slightly agree<br>3 = Neither agree nor disagree<br>4 = Slightly disagree<br>5 = Strongly disagree |                   | QOL_QS_2          |
| 37 QOL_QS_3 | 1         |       | 1 = Strongly agree                                                                                                           |                   | QOL_QS_3          |

**Production Germany 14. Jan. 2020: Primary matrix**  
**Folder: Final evaluation TP2**  
**Form: Final evaluation TP 2**  
**Generated On: 30 Sep 2020 12:31:31**

| Field Name  | Data Type | Units | Values                                                                                                                       | Pre-Filled Values | Include Field OID |
|-------------|-----------|-------|------------------------------------------------------------------------------------------------------------------------------|-------------------|-------------------|
|             |           |       | 2 = Slightly agree<br>3 = Neither agree nor disagree<br>4 = Slightly disagree<br>5 = Strongly disagree                       |                   |                   |
| 38 QOL_QS_4 | 1         |       | 1 = Strongly agree<br>2 = Slightly agree<br>3 = Neither agree nor disagree<br>4 = Slightly disagree<br>5 = Strongly disagree |                   | QOL_QS_4          |
| 39 QOL_QS_5 | 1         |       | 1 = Strongly agree<br>2 = Slightly agree<br>3 = Neither agree nor disagree<br>4 = Slightly disagree                          |                   | QOL_QS_5          |

**Production Germany 14. Jan. 2020: Primary matrix**  
**Folder: Final evaluation TP2**  
**Form: Final evaluation TP 2**  
**Generated On: 30 Sep 2020 12:31:31**

| Field Name  | Data Type | Units | Values                                                                                                                       | Pre-Filled Values | Include Field OID |
|-------------|-----------|-------|------------------------------------------------------------------------------------------------------------------------------|-------------------|-------------------|
|             |           |       | 5 =<br>Strongly disagree                                                                                                     |                   |                   |
| 40 QOL_QS_6 | 1         |       | 1 = Strongly agree<br>2 = Slightly agree<br>3 = Neither agree nor disagree<br>4 = Slightly disagree<br>5 = Strongly disagree |                   | QOL_QS_6          |
| 41 QOLH2    | 1         |       |                                                                                                                              |                   | QOLH2             |
| 42 QOL_QS_7 | 1         |       | 1 = Strongly agree<br>2 = Slightly agree<br>3 = Neither agree nor disagree<br>4 = Slightly disagree<br>5 = Strongly disagree |                   | QOL_QS_7          |

**Production Germany 14. Jan. 2020: Primary matrix**  
**Folder: Final evaluation TP2**  
**Form: Final evaluation TP 2**  
**Generated On: 30 Sep 2020 12:31:31**

| Field Name    | Data Type | Units | Values                                                                                                                       | Pre-Filled Values | Include Field OID |
|---------------|-----------|-------|------------------------------------------------------------------------------------------------------------------------------|-------------------|-------------------|
| 43 QOL_QS_8   | 1         |       | 1 = Strongly agree<br>2 = Slightly agree<br>3 = Neither agree nor disagree<br>4 = Slightly disagree<br>5 = Strongly disagree |                   | QOL_QS_8          |
| 44 QOL_QS_9   | 1         |       | 1 = Strongly agree<br>2 = Slightly agree<br>3 = Neither agree nor disagree<br>4 = Slightly disagree<br>5 = Strongly disagree |                   | QOL_QS_9          |
| 45 QOL_QS_101 |           |       | 1 = Strongly agree<br>2 = Slightly agree<br>3 = Neither agree nor disagree                                                   |                   | QOL_QS_10         |

**Production Germany 14. Jan. 2020: Primary matrix**  
**Folder: Final evaluation TP2**  
**Form: Final evaluation TP 2**  
**Generated On: 30 Sep 2020 12:31:31**

| Field Name    | Data Type | Units | Values                                                                                                                       | Pre-Filled Values | Include Field OID |
|---------------|-----------|-------|------------------------------------------------------------------------------------------------------------------------------|-------------------|-------------------|
|               |           |       | 4 = Slightly disagree<br>5 = Strongly disagree                                                                               |                   |                   |
| 46 QOL_QS_111 |           |       | 1 = Strongly agree<br>2 = Slightly agree<br>3 = Neither agree nor disagree<br>4 = Slightly disagree<br>5 = Strongly disagree |                   | QOL_QS_11         |
| 47 QOL_QS_121 |           |       | 1 = Strongly agree<br>2 = Slightly agree<br>3 = Neither agree nor disagree<br>4 = Slightly disagree<br>5 = Strongly disagree |                   | QOL_QS_12         |

**Production Germany 14. Jan. 2020: Primary matrix**  
**Folder: Final evaluation TP2**  
**Form: Final evaluation TP 2**  
**Generated On: 30 Sep 2020 12:31:31**

| Field Name    | Data Type | Units | Values                                                                                                                       | Pre-Filled Values | Include Field OID |
|---------------|-----------|-------|------------------------------------------------------------------------------------------------------------------------------|-------------------|-------------------|
| 48 QOLH3      | 1         |       |                                                                                                                              |                   | QOLH3             |
| 49 QOL_QS_131 |           |       | 1 = Strongly agree<br>2 = Slightly agree<br>3 = Neither agree nor disagree<br>4 = Slightly disagree<br>5 = Strongly disagree |                   | QOL_QS_13         |
| 50 QOL_QS_141 |           |       | 1 = Strongly agree<br>2 = Slightly agree<br>3 = Neither agree nor disagree<br>4 = Slightly disagree<br>5 = Strongly disagree |                   | QOL_QS_14         |
| 51 QOL_QS_151 |           |       | 1 = Strongly agree                                                                                                           |                   | QOL_QS_15         |

**Production Germany 14. Jan. 2020: Primary matrix**  
**Folder: Final evaluation TP2**  
**Form: Final evaluation TP 2**  
**Generated On: 30 Sep 2020 12:31:31**

| Field Name    | Data Type | Units | Values                                                                                                                       | Pre-Filled Values | Include Field OID |
|---------------|-----------|-------|------------------------------------------------------------------------------------------------------------------------------|-------------------|-------------------|
|               |           |       | 2 = Slightly agree<br>3 = Neither agree nor disagree<br>4 = Slightly disagree<br>5 = Strongly disagree                       |                   |                   |
| 52 QOL_QS_161 |           |       | 1 = Strongly agree<br>2 = Slightly agree<br>3 = Neither agree nor disagree<br>4 = Slightly disagree<br>5 = Strongly disagree |                   | QOL_QS_16         |
| 53 QOL_QS_171 |           |       | 1 = Strongly agree<br>2 = Slightly agree<br>3 = Neither agree nor disagree<br>4 = Slightly disagree                          |                   | QOL_QS_17         |



**Production Germany 14. Jan. 2020: Primary matrix**  
**Folder: Final evaluation TP2**  
**Form: Final evaluation TP 2**  
**Generated On: 30 Sep 2020 12:31:31**

| Field Name    | Data Type | Units | Values                                                                                                                             | Pre-Filled Values | Include Field OID |
|---------------|-----------|-------|------------------------------------------------------------------------------------------------------------------------------------|-------------------|-------------------|
|               |           |       | 5 =<br>Strongly disagree                                                                                                           |                   |                   |
| 54 QOL_QS_181 |           |       | 1 =<br>Strongly agree<br>2 = Slightly agree<br>3 = Neither agree nor disagree<br>4 = Slightly disagree<br>5 =<br>Strongly disagree |                   | QOL_QS_18         |
| 55 QOLH4      | 1         |       |                                                                                                                                    |                   | QOLH4             |
| 56 QOL_QS_191 |           |       | 1 =<br>Strongly agree<br>2 = Slightly agree<br>3 = Neither agree nor disagree<br>4 = Slightly disagree<br>5 =<br>Strongly disagree |                   | QOL_QS_19         |

**Production Germany 14. Jan. 2020: Primary matrix**  
**Folder: Final evaluation TP2**  
**Form: Final evaluation TP 2**  
**Generated On: 30 Sep 2020 12:31:31**

| Field Name    | Data Type | Units | Values                                                                                                                       | Pre-Filled Values | Include Field OID |
|---------------|-----------|-------|------------------------------------------------------------------------------------------------------------------------------|-------------------|-------------------|
| 57 QOL_QS_201 |           |       | 1 = Strongly agree<br>2 = Slightly agree<br>3 = Neither agree nor disagree<br>4 = Slightly disagree<br>5 = Strongly disagree |                   | QOL_QS_20         |
| 58 QOL_QS_211 |           |       | 1 = Strongly agree<br>2 = Slightly agree<br>3 = Neither agree nor disagree<br>4 = Slightly disagree<br>5 = Strongly disagree |                   | QOL_QS_21         |
| 59 QOL_QS_221 |           |       | 1 = Strongly agree<br>2 = Slightly agree<br>3 = Neither agree nor disagree                                                   |                   | QOL_QS_22         |

**Production Germany 14. Jan. 2020: Primary matrix**  
**Folder: Final evaluation TP2**  
**Form: Final evaluation TP 2**  
**Generated On: 30 Sep 2020 12:31:31**

| Field Name             | Data Type | Units | Values                                                                                                                       | Pre-Filled Values | Include Field OID |
|------------------------|-----------|-------|------------------------------------------------------------------------------------------------------------------------------|-------------------|-------------------|
|                        |           |       | 4 = Slightly disagree<br>5 = Strongly disagree                                                                               |                   |                   |
| 60 QOL_QS_231          |           |       | 1 = Strongly agree<br>2 = Slightly agree<br>3 = Neither agree nor disagree<br>4 = Slightly disagree<br>5 = Strongly disagree |                   | QOL_QS_23         |
| 61 Feeling of security | 1         |       | 1 = Very poor<br>2 = Poor<br>3 = Neither poor nor good<br>4 = Good<br>5 = Very good                                          |                   | SECURITY          |
| 62 Cutting difficulty  | 1         |       | 1 = Very difficult<br>2 = Difficult                                                                                          |                   | CUTTING_D IFF     |

Production Germany 14. Jan. 2020: Primary matrix

Folder: Final evaluation TP2

Form: Final evaluation TP 2

Generated On: 30 Sep 2020 12:31:31

| Field Name                | Data Type | Units | Values                                                                                             | Pre-Filled Values | Include Field OID |
|---------------------------|-----------|-------|----------------------------------------------------------------------------------------------------|-------------------|-------------------|
|                           |           |       | 3 = Neither difficult nor easy<br>4 = Easy<br>5 = Very easy                                        |                   |                   |
| 63 Application of product | 1         |       | 1 = Very difficult<br>2 = Difficult<br>3 = Neither difficult nor easy<br>4 = Easy<br>5 = Very easy |                   | APPLICATION       |
| 64 Removal of baseplate   | 1         |       | 1 = Very difficult<br>2 = Difficult<br>3 = Neither difficult nor easy<br>4 = Easy<br>5 = Very easy |                   | REMOVAL           |
| 65 Preference 1           | 1         |       | 1 = The product from the first test period                                                         |                   | PREFERENC<br>E_1  |

**Production Germany 14. Jan. 2020: Primary matrix**

**Folder: Final evaluation TP2**

**Form: Final evaluation TP 2**

**Generated On: 30 Sep 2020 12:31:31**

| Field Name          | Data Type | Units | Values                                      | Pre-Filled Values | Include Field OID |
|---------------------|-----------|-------|---------------------------------------------|-------------------|-------------------|
|                     |           |       | 2 = The product from the second test period |                   |                   |
| 67 Preference no. 1 | 1         |       |                                             |                   | MULTI_PRE F_1     |
| 68 Preference no. 2 | 1         |       |                                             |                   | MULTI_PRE F_2     |
| 69 Preference no. 3 | 1         |       |                                             |                   | MULTI_PRE F_3     |
| 70 Preference no. 4 | 1         |       |                                             |                   | MULTI_PRE F_4     |
| 71 Preference no. 5 | 1         |       |                                             |                   | MULTI_PRE F_5     |
| 72 Preference no. 6 | 1         |       |                                             |                   | MULTI_PRE F_6     |
| 73 Preference no. 7 | 1         |       |                                             |                   | MULTI_PRE F_7     |
| 74 Preference no. 8 | 1         |       |                                             |                   | MULTI_PRE F_8     |

**Production Germany 14. Jan. 2020: Primary matrix**

**Folder: Final evaluation TP2**

**Form: Final evaluation TP 2**

**Generated On: 30 Sep 2020 12:31:31**

| Field Name           | Data Type | Units | Values                                                                                                            | Pre-Filled Values | Include Field OID |
|----------------------|-----------|-------|-------------------------------------------------------------------------------------------------------------------|-------------------|-------------------|
| 75 Preference no. 9  | 1         |       |                                                                                                                   |                   | MULTI_PRE F_9     |
| 76 Preference 2      | 1         |       | 1 = The product from the first test period<br>2 = The product from the second test period<br>3 = Your own product |                   | PREFERENC E_2     |
| 78 Preference no. 21 | 1         |       |                                                                                                                   |                   | MULTI_PRE F2_1    |
| 79 Preference no. 22 | 1         |       |                                                                                                                   |                   | MULTI_PRE F2_2    |
| 80 Preference no. 23 | 1         |       |                                                                                                                   |                   | MULTI_PRE F2_3    |
| 81 Preference no. 24 | 1         |       |                                                                                                                   |                   | MULTI_PRE F2_4    |
| 82 Preference no. 25 | 1         |       |                                                                                                                   |                   | MULTI_PRE F2_5    |

**Production Germany 14. Jan. 2020: Primary matrix**  
**Folder: Final evaluation TP2**  
**Form: Final evaluation TP 2**  
**Generated On: 30 Sep 2020 12:31:31**

---

| Field Name           | Data Type | Units | Values | Pre-Filled Values | Include Field OID  |
|----------------------|-----------|-------|--------|-------------------|--------------------|
| 83 Preference no. 26 | 1         |       |        |                   | MULTI_PRE<br>F2_6  |
| 84 Preference no. 27 | 1         |       |        |                   | MULTI_PRE<br>F2_7  |
| 85 Preference no. 28 | 1         |       |        |                   | MULTI_PRE<br>F2_28 |
| 86 Preference no. 29 | 1         |       |        |                   | MULTI_PRE<br>F2_9  |

---

**Production Germany 14. Jan. 2020: Primary matrix**  
**Folder: Measurements**  
**Form: Skin discolouration**  
**Generated On: 30 Sep 2020 12:31:31**

---

|                                          |       |   |
|------------------------------------------|-------|---|
| STUDY ID                                 | _____ | ① |
| SITE ID                                  | _____ | ② |
| SUBJECT ID                               | _____ | ③ |
| Photo date                               | _____ | ④ |
| Photo time                               | _____ | ⑤ |
| Sequence no.                             | _____ | ⑥ |
| PHOTO ID                                 | _____ | ⑦ |
| Total discoloration area (cm2)           | _____ | ⑧ |
| Discoloration area_Inner zone 3 cm (cm2) | _____ | ⑨ |
| Discoloration area_Outer zone 3 cm (cm2) | _____ | ⑩ |
| Total Intensity<br>0-10% (cm2)           | _____ | ⑪ |
| Total Intensity<br>11-20% (cm2)          | _____ | ⑫ |
| Total Intensity<br>21-30% (cm2)          | _____ | ⑬ |

---



**Production Germany 14. Jan. 2020: Primary matrix**  
**Folder: Measurements**  
**Form: Skin discolouration**  
**Generated On: 30 Sep 2020 12:31:31**

---

Total Intensity  
31-40% (cm2) \_\_\_\_\_ **14**

---

Total Intensity  
41-50% (cm2) \_\_\_\_\_ **15**

---

Total Intensity  
51-60% (cm2) \_\_\_\_\_ **16**

---

Total Intensity  
61-70% (cm2) \_\_\_\_\_ **17**

---

Total Intensity  
71-80% (cm2) \_\_\_\_\_ **18**

---

Total Intensity  
81-90% (cm2) \_\_\_\_\_ **19**

---

Total Intensity  
91-100% (cm2) \_\_\_\_\_ **20**

---

Intensity\_Inner zone (3 cm)  
0-10% (cm2) \_\_\_\_\_ **21**

---

Intensity\_Inner zone (3 cm)  
11-20% (cm2) \_\_\_\_\_ **22**

---

Intensity\_Inner zone (3 cm)  
21-30% (cm2) \_\_\_\_\_ **23**

---

Intensity\_Inner zone (3 cm)  
31-40% (cm2) \_\_\_\_\_ **24**

---

**Production Germany 14. Jan. 2020: Primary matrix**

**Folder: Measurements**

**Form: Skin discolouration**

**Generated On: 30 Sep 2020 12:31:31**

---

Intensity\_Inner zone (3 cm) 25  
41-50% (cm2) \_\_\_\_\_

---

Intensity\_Inner zone (3 cm) 26  
51-60% (cm2) \_\_\_\_\_

---

Intensity\_Inner zone (3 cm) 27  
61-70% (cm2) \_\_\_\_\_

---

Intensity\_Inner zone (3 cm) 28  
71-80% (cm2) \_\_\_\_\_

---

Intensity\_Inner zone (3 cm) 29  
81-90% (cm2) \_\_\_\_\_

---

Intensity\_Inner zone (3 cm) 30  
91-100% (cm2) \_\_\_\_\_

---

Intensity\_outer zone (3 cm) 31  
0-10% (cm2) \_\_\_\_\_

---

Intensity\_outer zone (3 cm) 32  
11-20% (cm2) \_\_\_\_\_

---

Intensity\_outer zone (3 cm) 33  
21-30% (cm2) \_\_\_\_\_

---

Intensity\_outer zone (3 cm) 34  
31-40% (cm2) \_\_\_\_\_

---

Intensity\_outer zone (3 cm) 35  
41-50% (cm2) \_\_\_\_\_

---

**Production Germany 14. Jan. 2020: Primary matrix**  
**Folder: Measurements**  
**Form: Skin discolouration**  
**Generated On: 30 Sep 2020 12:31:31**

---

Intensity\_outer zone (3 cm) 36  
51-60% (cm2) \_\_\_\_\_

---

Intensity\_outer zone (3 cm) 37  
61-70% (cm2) \_\_\_\_\_

---

Intensity\_outer zone (3 cm) 38  
71-80% (cm2) \_\_\_\_\_

---

Intensity\_outer zone (3 cm) 39  
81-90% (cm2) \_\_\_\_\_

---

Intensity\_outer zone (3 cm) 40  
91-100% (cm2) \_\_\_\_\_

---

**Production Germany 14. Jan. 2020: Primary matrix**

**Folder: Measurements**

**Form: Skin discolouration**

**Generated On: 30 Sep 2020 12:31:31**

|   | Field Name           | Data Type      | Units | Values | Pre-Filled Values | Include Field OID    |
|---|----------------------|----------------|-------|--------|-------------------|----------------------|
| ① | STUDY ID             | \$50           |       |        |                   | STUDY_ID             |
| ② | SITE ID              | \$50           |       |        |                   | SITE_ID              |
| ③ | SUBJECT ID           | \$5            |       |        |                   | SUBJECT_ID           |
| ④ | Photo date           | dd MMM<br>YYYY |       |        |                   | PHOTODAT             |
| ⑤ | Photo time           | \$12           |       |        |                   | PHOTOTM              |
| ⑥ | Sequence no.         | 5              |       |        |                   | SEQUENCE             |
| ⑦ | PHOTO ID             | \$70           |       |        |                   | PHOTO_ID             |
| ⑧ | Total discolouration | 3.3            |       |        |                   | DISCOLOURATION_TOTAL |
| ⑨ | Inner discolouration | 3.3            |       |        |                   | DISCOLOURATION_INNER |
| ⑩ | Outer discolouration | 3.3            |       |        |                   | DISCOLOURATION_OUTER |

**Production Germany 14. Jan. 2020: Primary matrix**

**Folder: Measurements**

**Form: Skin discolouration**

**Generated On: 30 Sep 2020 12:31:31**

| Field Name           | Data Type | Units | Values | Pre-Filled Values | Include Field OID |
|----------------------|-----------|-------|--------|-------------------|-------------------|
| 11 Total intensity 0 | 3.3       |       |        |                   | INTENSITY_TOTAL_0 |
| 12 Total intensity 1 | 3.3       |       |        |                   | INTENSITY_TOTAL_1 |
| 13 Total intensity 2 | 3.3       |       |        |                   | INTENSITY_TOTAL_2 |
| 14 Total intensity 3 | 3.3       |       |        |                   | INTENSITY_TOTAL_3 |
| 15 Total intensity 4 | 3.3       |       |        |                   | INTENSITY_TOTAL_4 |
| 16 Total intensity 5 | 3.3       |       |        |                   | INTENSITY_TOTAL_5 |
| 17 Total intensity 6 | 3.3       |       |        |                   | INTENSITY_TOTAL_6 |
| 18 Total intensity 7 | 3.3       |       |        |                   | INTENSITY_TOTAL_7 |
| 19 Total intensity 8 | 3.3       |       |        |                   | INTENSITY_TOTAL_8 |
| 20 Total intensity 9 | 3.3       |       |        |                   | INTENSITY_TOTAL_9 |

**Production Germany 14. Jan. 2020: Primary matrix**

**Folder: Measurements**

**Form: Skin discolouration**

**Generated On: 30 Sep 2020 12:31:31**

| Field Name           | Data Type | Units | Values | Pre-Filled Values | Include Field OID |
|----------------------|-----------|-------|--------|-------------------|-------------------|
| 21 Inner intensity 0 | 3.3       |       |        |                   | INTENSITY_INNER_0 |
| 22 Inner intensity 1 | 3.3       |       |        |                   | INTENSITY_INNER_1 |
| 23 Inner intensity 2 | 3.3       |       |        |                   | INTENSITY_INNER_2 |
| 24 Inner intensity 3 | 3.3       |       |        |                   | INTENSITY_INNER_3 |
| 25 Inner intensity 4 | 3.3       |       |        |                   | INTENSITY_INNER_4 |
| 26 Inner intensity 5 | 3.3       |       |        |                   | INTENSITY_INNER_5 |
| 27 Inner intensity 6 | 3.3       |       |        |                   | INTENSITY_INNER_6 |
| 28 Inner intensity 7 | 3.3       |       |        |                   | INTENSITY_INNER_7 |
| 29 Inner intensity 8 | 3.3       |       |        |                   | INTENSITY_INNER_8 |
| 30 Inner intensity 9 | 3.3       |       |        |                   | INTENSITY_INNER_9 |

**Production Germany 14. Jan. 2020: Primary matrix**

**Folder: Measurements**

**Form: Skin discolouration**

**Generated On: 30 Sep 2020 12:31:31**

| Field Name           | Data Type | Units | Values | Pre-Filled Values | Include Field OID |
|----------------------|-----------|-------|--------|-------------------|-------------------|
| 31 Outer intensity 0 | 3.3       |       |        |                   | INTENSITY_OUTER_0 |
| 32 Outer intensity 1 | 3.3       |       |        |                   | INTENSITY_OUTER_1 |
| 33 Outer intensity 2 | 3.3       |       |        |                   | INTENSITY_OUTER_2 |
| 34 Outer intensity 3 | 3.3       |       |        |                   | INTENSITY_OUTER_3 |
| 35 Outer intensity 4 | 3.3       |       |        |                   | INTENSITY_OUTER_4 |
| 36 Outer intensity 5 | 3.3       |       |        |                   | INTENSITY_OUTER_5 |
| 37 Outer intensity 6 | 3.3       |       |        |                   | INTENSITY_OUTER_6 |
| 38 Outer intensity 7 | 3.3       |       |        |                   | INTENSITY_OUTER_7 |
| 39 Outer intensity 8 | 3.3       |       |        |                   | INTENSITY_OUTER_8 |
| 40 Outer intensity 9 | 3.3       |       |        |                   | INTENSITY_OUTER_9 |

**Production Germany 14. Jan. 2020: Primary matrix**  
**Folder: Measurements**  
**Form: Leakage measurements**  
**Generated On: 30 Sep 2020 12:31:31**

---

|                                 |       |   |
|---------------------------------|-------|---|
| STUDY ID                        | _____ | ① |
| SITE ID                         | _____ | ② |
| SUBJECT ID                      | _____ | ③ |
| Photo date                      | _____ | ④ |
| Photo time                      | _____ | ⑤ |
| Sequence no.                    | _____ | ⑥ |
| PHOTO ID                        | _____ | ⑦ |
| Leakage area (cm <sup>2</sup> ) | _____ | ⑧ |
| Shortest distance to edge (cm)  | _____ | ⑨ |
| Area center hole                | _____ | ⑩ |
| Area baseplate                  | _____ | ⑪ |

---



**Production Germany 14. Jan. 2020: Primary matrix**

**Folder: Measurements**

**Form: Leakage measurements**

**Generated On: 30 Sep 2020 12:31:31**

|   | Field Name          | Data Type      | Units | Values | Pre-Filled Values | Include Field OID |
|---|---------------------|----------------|-------|--------|-------------------|-------------------|
| ① | STUDY ID            | \$50           |       |        |                   | STUDY_ID          |
| ② | SITE ID             | \$50           |       |        |                   | SITE_ID           |
| ③ | SUBJECT ID          | \$5            |       |        |                   | SUBJECT_ID        |
| ④ | Photo date          | dd MMM<br>YYYY |       |        |                   | PHOTODAT          |
| ⑤ | Photo time          | \$12           |       |        |                   | PHOTOTM           |
| ⑥ | Sequence no.        | 5              |       |        |                   | SEQUENCE          |
| ⑦ | PHOTO ID            | \$70           |       |        |                   | PHOTO_ID          |
| ⑧ | Area of leakage     | 3.3            |       |        |                   | AREA_LEAKAGE      |
| ⑨ | Shortest distance   | 3.3            |       |        |                   | DISTANCE          |
| ⑩ | Area of center hole | 3.3            |       |        |                   | AREA_CENTERHOLE   |
| ⑪ | Area of baseplate   | 3.3            |       |        |                   | AREA_BASEPLATE    |

**Production Germany 14. Jan. 2020: Primary matrix**  
**Folder: Measurements >> DET score CA visit 1**  
**Form: DET score by external nurse**  
**Generated On: 30 Sep 2020 12:31:31**

---

Please evaluate the skin on the photo using the DET score

---

Domain 1: Discolouration

---

Area of discolouration

0  3  
1   
2   
3

---

Severity of discolouration

1  4  
2

---

Domain 2: Erosion

---

Area of erosion

0  6  
1   
2   
3

---

Severity of erosion

1  7  
2

---

Domain 3: Tissue overgrowth

---

Area of tissue overgrowth

0  9  
1   
2   
3

---

Production Germany 14. Jan. 2020: Primary matrix  
Folder: Measurements >> DET score CA visit 1  
Form: DET score by external nurse  
Generated On: 30 Sep 2020 12:31:31

---

Severity of tissue overgrowth

1  10  
2

---

Total DET score

---

11

---

Production Germany 14. Jan. 2020: Primary matrix

Folder: Measurements >> DET score CA visit 1

Form: DET score by external nurse

Generated On: 30 Sep 2020 12:31:31

|   | Field Name                    | Data Type | Units | Values                           | Pre-Filled Values | Include Field OID   |
|---|-------------------------------|-----------|-------|----------------------------------|-------------------|---------------------|
| ③ | Area of discolouration        | 1         |       | 0 = 0<br>1 = 1<br>2 = 2<br>3 = 3 |                   | DISCOLOUR_AREA      |
| ④ | Severity of discolouration    | 1         |       | 1 = 1<br>2 = 2                   |                   | DISCOLOUR_SEVERITY  |
| ⑥ | Area of erosion               | 1         |       | 0 = 0<br>1 = 1<br>2 = 2<br>3 = 3 |                   | EROSION_AREA        |
| ⑦ | Severity of erosion           | 1         |       | 1 = 1<br>2 = 2                   |                   | EROSION_SEVERITY    |
| ⑨ | Area of tissue overgrowth     | 1         |       | 0 = 0<br>1 = 1<br>2 = 2<br>3 = 3 |                   | OVERGROWTH_AREA     |
| ⑩ | Severity of tissue overgrowth | 1         |       | 1 = 1<br>2 = 2                   |                   | OVERGROWTH_SEVERITY |
| ⑪ | Total DET score               | 2         |       |                                  |                   | DETSORE_TOTAL       |

**Production Germany 14. Jan. 2020: Primary matrix**  
**Folder: Measurements >> DET score CA visit 2**  
**Form: DET score by external nurse**  
**Generated On: 30 Sep 2020 12:31:31**

---

Please evaluate the skin on the photo using the DET score

---

Domain 1: Discolouration

---

Area of discolouration

0  3  
1   
2   
3

---

Severity of discolouration

1  4  
2

---

Domain 2: Erosion

---

Area of erosion

0  6  
1   
2   
3

---

Severity of erosion

1  7  
2

---

Domain 3: Tissue overgrowth

---

Area of tissue overgrowth

0  9  
1   
2   
3

---

**Production Germany 14. Jan. 2020: Primary matrix**  
**Folder: Measurements >> DET score CA visit 2**  
**Form: DET score by external nurse**  
**Generated On: 30 Sep 2020 12:31:31**

---

Severity of tissue overgrowth

1  10  
2

---

Total DET score

---

11

---

**Production Germany 14. Jan. 2020: Primary matrix**  
**Folder: Measurements >> DET score CA visit 2**  
**Form: DET score by external nurse**  
**Generated On: 30 Sep 2020 12:31:31**

| Field Name                      | Data Type | Units | Values                           | Pre-Filled Values | Include Field OID   |
|---------------------------------|-----------|-------|----------------------------------|-------------------|---------------------|
| ③ Area of discolouration        | 1         |       | 0 = 0<br>1 = 1<br>2 = 2<br>3 = 3 |                   | DISCOLOUR_AREA      |
| ④ Severity of discolouration    | 1         |       | 1 = 1<br>2 = 2                   |                   | DISCOLOUR_SEVERITY  |
| ⑥ Area of erosion               | 1         |       | 0 = 0<br>1 = 1<br>2 = 2<br>3 = 3 |                   | EROSION_AREA        |
| ⑦ Severity of erosion           | 1         |       | 1 = 1<br>2 = 2                   |                   | EROSION_SEVERITY    |
| ⑨ Area of tissue overgrowth     | 1         |       | 0 = 0<br>1 = 1<br>2 = 2<br>3 = 3 |                   | OVERGROWTH_AREA     |
| ⑩ Severity of tissue overgrowth | 1         |       | 1 = 1<br>2 = 2                   |                   | OVERGROWTH_SEVERITY |
| ⑪ Total DET score               | 2         |       |                                  |                   | DETSORE_TOTAL       |

**Production Germany 14. Jan. 2020: Primary matrix**  
**Folder: Measurements >> DET score CA visit 3**  
**Form: DET score by external nurse**  
**Generated On: 30 Sep 2020 12:31:31**

---

Please evaluate the skin on the photo using the DET score

---

Domain 1: Discolouration

---

Area of discolouration

0  3  
1   
2   
3

---

Severity of discolouration

1  4  
2

---

Domain 2: Erosion

---

Area of erosion

0  6  
1   
2   
3

---

Severity of erosion

1  7  
2

---

Domain 3: Tissue overgrowth

---

Area of tissue overgrowth

0  9  
1   
2   
3

---



**Production Germany 14. Jan. 2020: Primary matrix**  
**Folder: Measurements >> DET score CA visit 3**  
**Form: DET score by external nurse**  
**Generated On: 30 Sep 2020 12:31:31**

---

Severity of tissue overgrowth

1  10  
2

---

Total DET score

11

---

**Production Germany 14. Jan. 2020: Primary matrix**  
**Folder: Measurements >> DET score CA visit 3**  
**Form: DET score by external nurse**  
**Generated On: 30 Sep 2020 12:31:31**

| Field Name                      | Data Type | Units | Values                           | Pre-Filled Values | Include Field OID   |
|---------------------------------|-----------|-------|----------------------------------|-------------------|---------------------|
| ③ Area of discolouration        | 1         |       | 0 = 0<br>1 = 1<br>2 = 2<br>3 = 3 |                   | DISCOLOUR_AREA      |
| ④ Severity of discolouration    | 1         |       | 1 = 1<br>2 = 2                   |                   | DISCOLOUR_SEVERITY  |
| ⑥ Area of erosion               | 1         |       | 0 = 0<br>1 = 1<br>2 = 2<br>3 = 3 |                   | EROSION_AREA        |
| ⑦ Severity of erosion           | 1         |       | 1 = 1<br>2 = 2                   |                   | EROSION_SEVERITY    |
| ⑨ Area of tissue overgrowth     | 1         |       | 0 = 0<br>1 = 1<br>2 = 2<br>3 = 3 |                   | OVERGROWTH_AREA     |
| ⑩ Severity of tissue overgrowth | 1         |       | 1 = 1<br>2 = 2                   |                   | OVERGROWTH_SEVERITY |
| ⑪ Total DET score               | 2         |       |                                  |                   | DETSORE_TOTAL       |

**Production Germany 14. Jan. 2020: Primary matrix**  
**Folder: Measurements >> DET score DK visit 1**  
**Form: DET score by external nurse**  
**Generated On: 30 Sep 2020 12:31:31**

---

Please evaluate the skin on the photo using the DET score

---

Domain 1: Discolouration

---

Area of discolouration

0  3  
1   
2   
3

---

Severity of discolouration

1  4  
2

---

Domain 2: Erosion

---

Area of erosion

0  6  
1   
2   
3

---

Severity of erosion

1  7  
2

---

Domain 3: Tissue overgrowth

---

Area of tissue overgrowth

0  9  
1   
2   
3

---

Production Germany 14. Jan. 2020: Primary matrix  
Folder: Measurements >> DET score DK visit 1  
Form: DET score by external nurse  
Generated On: 30 Sep 2020 12:31:31

---

Severity of tissue overgrowth

1  10  
2

---

Total DET score

11

---

Production Germany 14. Jan. 2020: Primary matrix

Folder: Measurements >> DET score DK visit 1

Form: DET score by external nurse

Generated On: 30 Sep 2020 12:31:31

|   | Field Name                    | Data Type | Units | Values                           | Pre-Filled Values | Include Field OID   |
|---|-------------------------------|-----------|-------|----------------------------------|-------------------|---------------------|
| ③ | Area of discolouration        | 1         |       | 0 = 0<br>1 = 1<br>2 = 2<br>3 = 3 |                   | DISCOLOUR_AREA      |
| ④ | Severity of discolouration    | 1         |       | 1 = 1<br>2 = 2                   |                   | DISCOLOUR_SEVERITY  |
| ⑥ | Area of erosion               | 1         |       | 0 = 0<br>1 = 1<br>2 = 2<br>3 = 3 |                   | EROSION_AREA        |
| ⑦ | Severity of erosion           | 1         |       | 1 = 1<br>2 = 2                   |                   | EROSION_SEVERITY    |
| ⑨ | Area of tissue overgrowth     | 1         |       | 0 = 0<br>1 = 1<br>2 = 2<br>3 = 3 |                   | OVERGROWTH_AREA     |
| ⑩ | Severity of tissue overgrowth | 1         |       | 1 = 1<br>2 = 2                   |                   | OVERGROWTH_SEVERITY |
| ⑪ | Total DET score               | 2         |       |                                  |                   | DETSORE_TOTAL       |

**Production Germany 14. Jan. 2020: Primary matrix**  
**Folder: Measurements >> DET score DK visit 2**  
**Form: DET score by external nurse**  
**Generated On: 30 Sep 2020 12:31:31**

---

Please evaluate the skin on the photo using the DET score

---

Domain 1: Discolouration

---

Area of discolouration

0  3  
1   
2   
3

---

Severity of discolouration

1  4  
2

---

Domain 2: Erosion

---

Area of erosion

0  6  
1   
2   
3

---

Severity of erosion

1  7  
2

---

Domain 3: Tissue overgrowth

---

Area of tissue overgrowth

0  9  
1   
2   
3

---

**Production Germany 14. Jan. 2020: Primary matrix**  
**Folder: Measurements >> DET score DK visit 2**  
**Form: DET score by external nurse**  
**Generated On: 30 Sep 2020 12:31:31**

---

Severity of tissue overgrowth

1  10  
2

---

Total DET score

11

---

**Production Germany 14. Jan. 2020: Primary matrix**  
**Folder: Measurements >> DET score DK visit 2**  
**Form: DET score by external nurse**  
**Generated On: 30 Sep 2020 12:31:31**

| Field Name                      | Data Type | Units | Values                           | Pre-Filled Values | Include Field OID   |
|---------------------------------|-----------|-------|----------------------------------|-------------------|---------------------|
| ③ Area of discolouration        | 1         |       | 0 = 0<br>1 = 1<br>2 = 2<br>3 = 3 |                   | DISCOLOUR_AREA      |
| ④ Severity of discolouration    | 1         |       | 1 = 1<br>2 = 2                   |                   | DISCOLOUR_SEVERITY  |
| ⑥ Area of erosion               | 1         |       | 0 = 0<br>1 = 1<br>2 = 2<br>3 = 3 |                   | EROSION_AREA        |
| ⑦ Severity of erosion           | 1         |       | 1 = 1<br>2 = 2                   |                   | EROSION_SEVERITY    |
| ⑨ Area of tissue overgrowth     | 1         |       | 0 = 0<br>1 = 1<br>2 = 2<br>3 = 3 |                   | OVERGROWTH_AREA     |
| ⑩ Severity of tissue overgrowth | 1         |       | 1 = 1<br>2 = 2                   |                   | OVERGROWTH_SEVERITY |
| ⑪ Total DET score               | 2         |       |                                  |                   | DETSORE_TOTAL       |



**Production Germany 14. Jan. 2020: Primary matrix**  
**Folder: Measurements >> DET score DK visit 3**  
**Form: DET score by external nurse**  
**Generated On: 30 Sep 2020 12:31:31**

---

Please evaluate the skin on the photo using the DET score

---

Domain 1: Discolouration

---

Area of discolouration

|   |                       |   |
|---|-----------------------|---|
| 0 | <input type="radio"/> | 3 |
| 1 | <input type="radio"/> |   |
| 2 | <input type="radio"/> |   |
| 3 | <input type="radio"/> |   |

---

Severity of discolouration

|   |                       |   |
|---|-----------------------|---|
| 1 | <input type="radio"/> | 4 |
| 2 | <input type="radio"/> |   |

---

Domain 2: Erosion

---

Area of erosion

|   |                       |   |
|---|-----------------------|---|
| 0 | <input type="radio"/> | 6 |
| 1 | <input type="radio"/> |   |
| 2 | <input type="radio"/> |   |
| 3 | <input type="radio"/> |   |

---

Severity of erosion

|   |                       |   |
|---|-----------------------|---|
| 1 | <input type="radio"/> | 7 |
| 2 | <input type="radio"/> |   |

---

Domain 3: Tissue overgrowth

---

Area of tissue overgrowth

|   |                       |   |
|---|-----------------------|---|
| 0 | <input type="radio"/> | 9 |
| 1 | <input type="radio"/> |   |
| 2 | <input type="radio"/> |   |
| 3 | <input type="radio"/> |   |

---

---

**Production Germany 14. Jan. 2020: Primary matrix**  
**Folder: Measurements >> DET score DK visit 3**  
**Form: DET score by external nurse**  
**Generated On: 30 Sep 2020 12:31:31**

---

Severity of tissue overgrowth

1  10  
2

---

Total DET score

11

---

**Production Germany 14. Jan. 2020: Primary matrix**  
**Folder: Measurements >> DET score DK visit 3**  
**Form: DET score by external nurse**  
**Generated On: 30 Sep 2020 12:31:31**

| Field Name                      | Data Type | Units | Values                           | Pre-Filled Values | Include Field OID   |
|---------------------------------|-----------|-------|----------------------------------|-------------------|---------------------|
| ③ Area of discolouration        | 1         |       | 0 = 0<br>1 = 1<br>2 = 2<br>3 = 3 |                   | DISCOLOUR_AREA      |
| ④ Severity of discolouration    | 1         |       | 1 = 1<br>2 = 2                   |                   | DISCOLOUR_SEVERITY  |
| ⑥ Area of erosion               | 1         |       | 0 = 0<br>1 = 1<br>2 = 2<br>3 = 3 |                   | EROSION_AREA        |
| ⑦ Severity of erosion           | 1         |       | 1 = 1<br>2 = 2                   |                   | EROSION_SEVERITY    |
| ⑨ Area of tissue overgrowth     | 1         |       | 0 = 0<br>1 = 1<br>2 = 2<br>3 = 3 |                   | OVERGROWTH_AREA     |
| ⑩ Severity of tissue overgrowth | 1         |       | 1 = 1<br>2 = 2                   |                   | OVERGROWTH_SEVERITY |
| ⑪ Total DET score               | 2         |       |                                  |                   | DETSORE_TOTAL       |

**Production Germany 14. Jan. 2020: Primary matrix**  
**Folder: Measurements >> DET score final visit 1**  
**Form: DET score by external nurse**  
**Generated On: 30 Sep 2020 12:31:31**

---

Please evaluate the skin on the photo using the DET score

---

Domain 1: Discolouration

---

Area of discolouration

|   |                       |   |
|---|-----------------------|---|
| 0 | <input type="radio"/> | 3 |
| 1 | <input type="radio"/> |   |
| 2 | <input type="radio"/> |   |
| 3 | <input type="radio"/> |   |

---

Severity of discolouration

|   |                       |   |
|---|-----------------------|---|
| 1 | <input type="radio"/> | 4 |
| 2 | <input type="radio"/> |   |

---

Domain 2: Erosion

---

Area of erosion

|   |                       |   |
|---|-----------------------|---|
| 0 | <input type="radio"/> | 6 |
| 1 | <input type="radio"/> |   |
| 2 | <input type="radio"/> |   |
| 3 | <input type="radio"/> |   |

---

Severity of erosion

|   |                       |   |
|---|-----------------------|---|
| 1 | <input type="radio"/> | 7 |
| 2 | <input type="radio"/> |   |

---

Domain 3: Tissue overgrowth

---

Area of tissue overgrowth

|   |                       |   |
|---|-----------------------|---|
| 0 | <input type="radio"/> | 9 |
| 1 | <input type="radio"/> |   |
| 2 | <input type="radio"/> |   |
| 3 | <input type="radio"/> |   |

---

**Production Germany 14. Jan. 2020: Primary matrix**  
**Folder: Measurements >> DET score final visit 1**  
**Form: DET score by external nurse**  
**Generated On: 30 Sep 2020 12:31:31**

---

Severity of tissue overgrowth

1  **10**  
2

---

Total DET score

---

**11**

---

**Production Germany 14. Jan. 2020: Primary matrix**  
**Folder: Measurements >> DET score final visit 1**  
**Form: DET score by external nurse**  
**Generated On: 30 Sep 2020 12:31:31**

| Field Name                      | Data Type | Units | Values                           | Pre-Filled Values | Include Field OID   |
|---------------------------------|-----------|-------|----------------------------------|-------------------|---------------------|
| ③ Area of discolouration        | 1         |       | 0 = 0<br>1 = 1<br>2 = 2<br>3 = 3 |                   | DISCOLOUR_AREA      |
| ④ Severity of discolouration    | 1         |       | 1 = 1<br>2 = 2                   |                   | DISCOLOUR_SEVERITY  |
| ⑥ Area of erosion               | 1         |       | 0 = 0<br>1 = 1<br>2 = 2<br>3 = 3 |                   | EROSION_AREA        |
| ⑦ Severity of erosion           | 1         |       | 1 = 1<br>2 = 2                   |                   | EROSION_SEVERITY    |
| ⑨ Area of tissue overgrowth     | 1         |       | 0 = 0<br>1 = 1<br>2 = 2<br>3 = 3 |                   | OVERGROWTH_AREA     |
| ⑩ Severity of tissue overgrowth | 1         |       | 1 = 1<br>2 = 2                   |                   | OVERGROWTH_SEVERITY |
| ⑪ Total DET score               | 2         |       |                                  |                   | DETSORE_TOTAL       |

**Production Germany 14. Jan. 2020: Primary matrix**  
**Folder: Measurements >> DET score final visit 2**  
**Form: DET score by external nurse**  
**Generated On: 30 Sep 2020 12:31:31**

---

Please evaluate the skin on the photo using the DET score

---

Domain 1: Discolouration

---

Area of discolouration

0  3  
1   
2   
3

---

Severity of discolouration

1  4  
2

---

Domain 2: Erosion

---

Area of erosion

0  6  
1   
2   
3

---

Severity of erosion

1  7  
2

---

Domain 3: Tissue overgrowth

---

Area of tissue overgrowth

0  9  
1   
2   
3

---

**Production Germany 14. Jan. 2020: Primary matrix**  
**Folder: Measurements >> DET score final visit 2**  
**Form: DET score by external nurse**  
**Generated On: 30 Sep 2020 12:31:31**

---

Severity of tissue overgrowth

1  10  
2

---

Total DET score

11

---



Production Germany 14. Jan. 2020: Primary matrix

Folder: Measurements >> DET score final visit 2

Form: DET score by external nurse

Generated On: 30 Sep 2020 12:31:31

|   | Field Name                    | Data Type | Units | Values                           | Pre-Filled Values | Include Field OID   |
|---|-------------------------------|-----------|-------|----------------------------------|-------------------|---------------------|
| ③ | Area of discolouration        | 1         |       | 0 = 0<br>1 = 1<br>2 = 2<br>3 = 3 |                   | DISCOLOUR_AREA      |
| ④ | Severity of discolouration    | 1         |       | 1 = 1<br>2 = 2                   |                   | DISCOLOUR_SEVERITY  |
| ⑥ | Area of erosion               | 1         |       | 0 = 0<br>1 = 1<br>2 = 2<br>3 = 3 |                   | EROSION_AREA        |
| ⑦ | Severity of erosion           | 1         |       | 1 = 1<br>2 = 2                   |                   | EROSION_SEVERITY    |
| ⑨ | Area of tissue overgrowth     | 1         |       | 0 = 0<br>1 = 1<br>2 = 2<br>3 = 3 |                   | OVERGROWTH_AREA     |
| ⑩ | Severity of tissue overgrowth | 1         |       | 1 = 1<br>2 = 2                   |                   | OVERGROWTH_SEVERITY |
| ⑪ | Total DET score               | 2         |       |                                  |                   | DETSORE_TOTAL       |

**Production Germany 14. Jan. 2020: Primary matrix**  
**Folder: Measurements >> DET score final visit 3**  
**Form: DET score by external nurse**  
**Generated On: 30 Sep 2020 12:31:31**

---

Please evaluate the skin on the photo using the DET score

---

Domain 1: Discolouration

---

Area of discolouration

0  3  
1   
2   
3

---

Severity of discolouration

1  4  
2

---

Domain 2: Erosion

---

Area of erosion

0  6  
1   
2   
3

---

Severity of erosion

1  7  
2

---

Domain 3: Tissue overgrowth

---

Area of tissue overgrowth

0  9  
1   
2   
3

---

**Production Germany 14. Jan. 2020: Primary matrix**  
**Folder: Measurements >> DET score final visit 3**  
**Form: DET score by external nurse**  
**Generated On: 30 Sep 2020 12:31:31**

---

Severity of tissue overgrowth

1  10  
2

---

Total DET score

---

11

---

**Production Germany 14. Jan. 2020: Primary matrix**  
**Folder: Measurements >> DET score final visit 3**  
**Form: DET score by external nurse**  
**Generated On: 30 Sep 2020 12:31:31**

| Field Name                      | Data Type | Units | Values                           | Pre-Filled Values | Include Field OID   |
|---------------------------------|-----------|-------|----------------------------------|-------------------|---------------------|
| ③ Area of discolouration        | 1         |       | 0 = 0<br>1 = 1<br>2 = 2<br>3 = 3 |                   | DISCOLOUR_AREA      |
| ④ Severity of discolouration    | 1         |       | 1 = 1<br>2 = 2                   |                   | DISCOLOUR_SEVERITY  |
| ⑥ Area of erosion               | 1         |       | 0 = 0<br>1 = 1<br>2 = 2<br>3 = 3 |                   | EROSION_AREA        |
| ⑦ Severity of erosion           | 1         |       | 1 = 1<br>2 = 2                   |                   | EROSION_SEVERITY    |
| ⑨ Area of tissue overgrowth     | 1         |       | 0 = 0<br>1 = 1<br>2 = 2<br>3 = 3 |                   | OVERGROWTH_AREA     |
| ⑩ Severity of tissue overgrowth | 1         |       | 1 = 1<br>2 = 2                   |                   | OVERGROWTH_SEVERITY |
| ⑪ Total DET score               | 2         |       |                                  |                   | DETSORE_TOTAL       |

**Production Germany 14. Jan. 2020: Primary matrix**  
**Folder: Administration**  
**Form: DM Administration**  
**Generated On: 30 Sep 2020 12:31:31**

---

Analysis population PP No  **1**  
Yes

---

Analysis population ITT No  **2**  
Yes

---

Analysis population Safety No  **3**  
Yes

---

Analysis population Screen Failure No  **4**  
Yes

---

**Production Germany 14. Jan. 2020: Primary matrix**

**Folder: Administration**

**Form: DM Administration**

**Generated On: 30 Sep 2020 12:31:31**

---

| Field Name                           | Data Type | Units | Values            | Pre-Filled Values | Include Field OID         |
|--------------------------------------|-----------|-------|-------------------|-------------------|---------------------------|
| ① Analysis population Per Protocol   | 1         |       | 0 = No<br>1 = Yes |                   | POPULATION_PP             |
| ② Analysis population ITT            | 1         |       | 0 = No<br>1 = Yes |                   | POPULATION_ITT            |
| ③ Analysis population Safety         | 1         |       | 0 = No<br>1 = Yes |                   | POPULATION_SAFETY         |
| ④ Analysis population Screen Failure | 1         |       | 0 = No<br>1 = Yes |                   | POPULATION_SCREEN_FAILURE |

---
