# Supplementary material for: Psychometric validation of the Ostomy Skin Tool 2.0
Source: PeerJ journal article supplement (doi:10.7717/peerj.16685), 2023-12-18
Supplement: S1_File_PRO_questionnaire.pdf [file S1_File_PRO_questionnaire.pdf]

# Modified ostomy skin tool

## Patient reported outcome

Coloplast Group – Ostomy Care / Continence Care / Wound & Skin Care / Urology Care

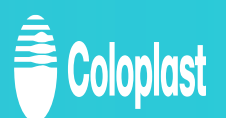

# Patient questionnaire

Patient number: \_ \_ \_ \_ \_

Date: \_ \_ / \_ \_ / \_ \_ \_ \_

## Instructions

*These questions should be completed by the patient themselves. The following questions ask about the **skin complications** you experience **around your stoma** (from the stoma site to the edge of the stoma bag adhesive). Please answer each question thinking about **right now when changing your product**.*

**Question 1.** Do you experience any **bleeding from the skin** around your stoma **right now** when changing your product? (tick one box only)

|                          |                          |
|--------------------------|--------------------------|
| <input type="checkbox"/> | <input type="checkbox"/> |
| Experiencing             | Not experiencing         |

**Question 2.** Once you have cleaned and dried the skin, do you still experience any **weeping or moisture on the skin** around your stoma **right now** when changing your product? (tick one box only)

|                          |                          |
|--------------------------|--------------------------|
| <input type="checkbox"/> | <input type="checkbox"/> |
| Experiencing             | Not experiencing         |

**Question 3.** Are you experiencing any **ulcers or sores** around your stoma **right now** when changing your product? (tick one box only)

|                          |                          |
|--------------------------|--------------------------|
| <input type="checkbox"/> | <input type="checkbox"/> |
| Experiencing             | Not experiencing         |

## Instructions

*The following questions ask about the **skin complications** you experience **around your stoma** (from the stoma site to the edge of the stoma bag adhesive). Please answer each question thinking about the period **since you last changed your product until now**.*

**Question 4.** Please rate on a scale from 0-10 how **itchy** the skin around your stoma has been at its worst since you last changed your product (tick one box only)

|                          |                          |                          |                          |                          |                          |                          |                          |                          |                          |                                                    |
|--------------------------|--------------------------|--------------------------|--------------------------|--------------------------|--------------------------|--------------------------|--------------------------|--------------------------|--------------------------|----------------------------------------------------|
| <input type="checkbox"/> | <input type="checkbox"/> | <input type="checkbox"/> | <input type="checkbox"/> | <input type="checkbox"/> | <input type="checkbox"/> | <input type="checkbox"/> | <input type="checkbox"/> | <input type="checkbox"/> | <input type="checkbox"/> | <input type="checkbox"/>                           |
| 0<br>No itch             | 1<br>Very mild<br>itch   | 2                        | 3                        | 4                        | 5                        | 6                        | 7                        | 8                        | 9                        | 10<br>Worst<br>possible<br>peristomal<br>skin itch |

# Patient questionnaire

Patient number: \_\_\_\_\_

Date: \_\_/\_\_/\_\_\_\_\_

**Question 5.** Please rate on a scale from 0-10 how **painful** the skin around your stoma has been at its worst since you last changed your product (tick one box only)

|                          |                          |                          |                          |                          |                          |                          |                          |                          |                          |                                                    |
|--------------------------|--------------------------|--------------------------|--------------------------|--------------------------|--------------------------|--------------------------|--------------------------|--------------------------|--------------------------|----------------------------------------------------|
| <input type="checkbox"/> | <input type="checkbox"/> | <input type="checkbox"/> | <input type="checkbox"/> | <input type="checkbox"/> | <input type="checkbox"/> | <input type="checkbox"/> | <input type="checkbox"/> | <input type="checkbox"/> | <input type="checkbox"/> | <input type="checkbox"/>                           |
| 0<br>No pain             | 1<br>Very mild<br>pain   | 2                        | 3                        | 4                        | 5                        | 6                        | 7                        | 8                        | 9                        | 10<br>Worst<br>possible<br>peristomal<br>skin pain |

**Question 6.** Please rate on a scale from 0-10 any **burning** feelings from the skin around your stoma at its worst since you last changed your product (tick one box only)

|                          |                           |                          |                          |                          |                          |                          |                          |                          |                          |                                                       |
|--------------------------|---------------------------|--------------------------|--------------------------|--------------------------|--------------------------|--------------------------|--------------------------|--------------------------|--------------------------|-------------------------------------------------------|
| <input type="checkbox"/> | <input type="checkbox"/>  | <input type="checkbox"/> | <input type="checkbox"/> | <input type="checkbox"/> | <input type="checkbox"/> | <input type="checkbox"/> | <input type="checkbox"/> | <input type="checkbox"/> | <input type="checkbox"/> | <input type="checkbox"/>                              |
| 0<br>No burning          | 1<br>Very mild<br>burning | 2                        | 3                        | 4                        | 5                        | 6                        | 7                        | 8                        | 9                        | 10<br>Worst<br>possible<br>peristomal<br>skin burning |
