# Supplementary material for: Psychometric validation of the Ostomy Skin Tool 2.0
Source: PeerJ journal article supplement (doi:10.7717/peerj.16685), 2023-12-18

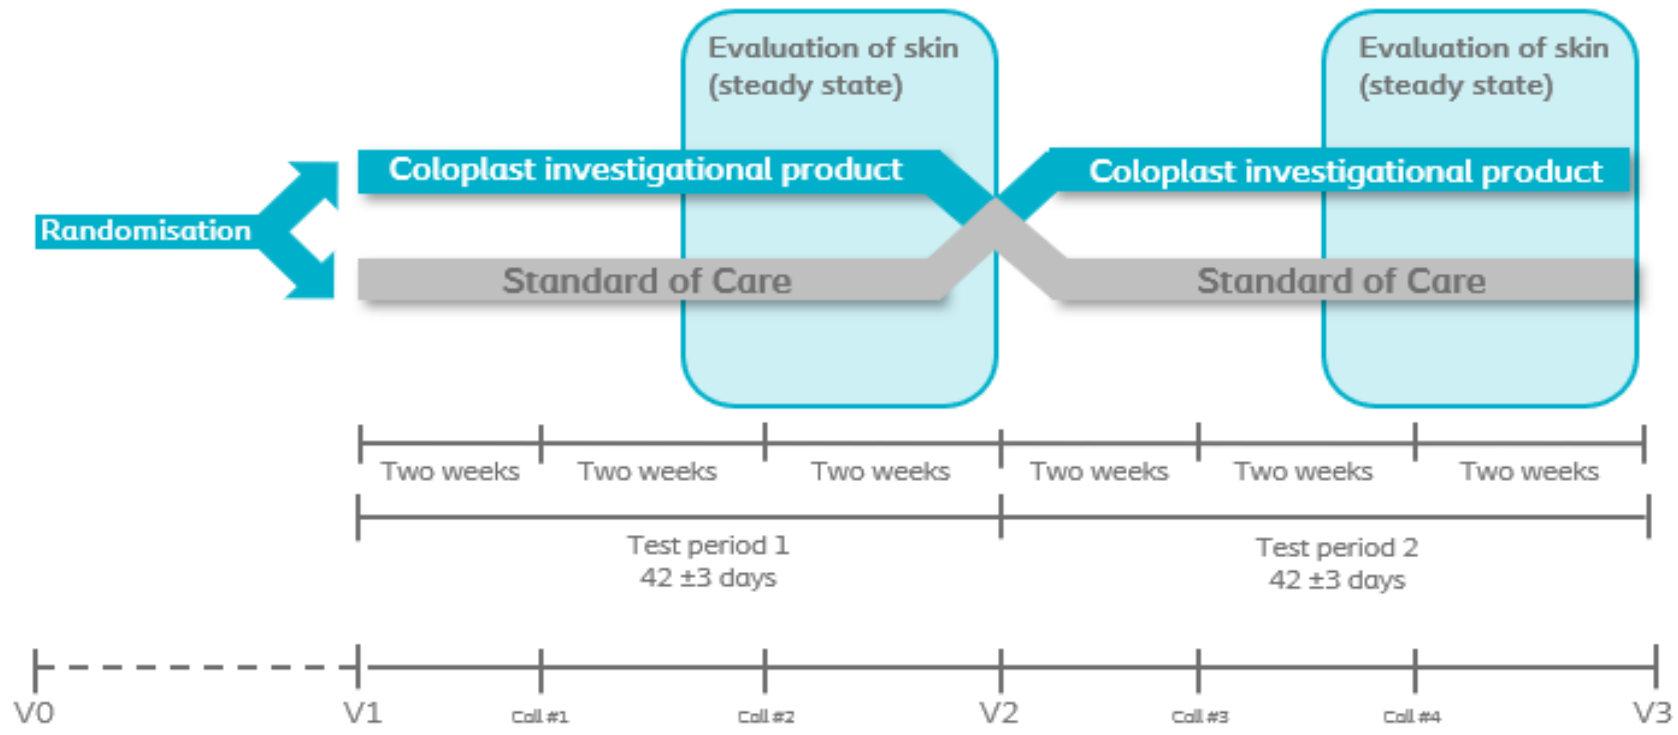

Supplement: S2_File_study_design.pdf [file S2_File_study_design.pdf]
