# Supplementary material for: Psychometric validation of the Ostomy Skin Tool 2.0
Source: PeerJ. 2023 Dec 18;11:e16685. doi: 10.7717/peerj.16685 (PMC10734405; doi:10.7717/peerj.16685)
Supplement: Supplemental Information 4 [file peerj-11-16685-s004.xlsx]

## Sheet: discolouration
projectid	project	studyid	environmentName	subjectId	StudySiteId	Subject	siteid	Site	SiteNumber	SiteGroup	instanceId	InstanceName	InstanceRepeatNumber	folderid	Folder	FolderName	FolderSeq	TargetDays	DataPageId	DataPageName	PageRepeatNumber	RecordDate	RecordId	RecordPosition	MinCreated	MaxUpdated	SaveTS	StudyEnvSiteNumber	DISCOLOURATION_TOTAL	DISCOLOURATION_TOTAL_RAW	DISCOLOURATION_INNER	DISCOLOURATION_INNER_RAW	DISCOLOURATION_OUTER	DISCOLOURATION_OUTER_RAW	INTENSITY_TOTAL_0	INTENSITY_TOTAL_0_RAW	INTENSITY_TOTAL_1	INTENSITY_TOTAL_1_RAW	INTENSITY_TOTAL_2	INTENSITY_TOTAL_2_RAW	INTENSITY_TOTAL_3	INTENSITY_TOTAL_3_RAW	INTENSITY_TOTAL_4	INTENSITY_TOTAL_4_RAW	INTENSITY_TOTAL_5	INTENSITY_TOTAL_5_RAW	INTENSITY_TOTAL_6	INTENSITY_TOTAL_6_RAW	INTENSITY_TOTAL_7
16	CP288	86	Prod	1093	78	2001	22	Universitätsklinikum Schleswig-Holstein	DE001	World	9119	Measurements	0	5855	MEASUREMENTS	Measurements	21		47784	Skin discolouration	0		131068	1	2020-07-14 06:47:03	2020-07-14 06:47:03	2020-07-17 12:54:26	DE001		7.23		3.494		3.746		4.24		2.999		4.254		2.986		0		0.24		1.009
16	CP288	86	Prod	1093	78	2001	22	Universitätsklinikum Schleswig-Holstein	DE001	World	9119	Measurements	0	5855	MEASUREMENTS	Measurements	21		47784	Skin discolouration	0		196775	2	2020-07-14 06:47:03	2020-07-14 06:47:03	2020-07-17 12:54:26	DE001		5.43		1.974		3.459		1.984		3.448		2.008		3.424		0.205		0.087		0.391
16	CP288	86	Prod	1093	78	2001	22	Universitätsklinikum Schleswig-Holstein	DE001	World	9119	Measurements	0	5855	MEASUREMENTS	Measurements	21		47784	Skin discolouration	0		196776	3	2020-07-14 06:47:03	2020-07-14 06:47:03	2020-07-17 12:54:26	DE001		25.21		2.781		22.43		3.748		21.47		4.536		20.68		0.787		1.612		1.325
16	CP288	86	Prod	1093	78	2001	22	Universitätsklinikum Schleswig-Holstein	DE001	World	9119	Measurements	0	5855	MEASUREMENTS	Measurements	21		47784	Skin discolouration	0		196777	4	2020-07-14 06:47:03	2020-07-14 06:47:03	2020-07-17 12:54:26	DE001		6.05		2.533		3.526		2.732		3.327		2.768		3.291		0.483		0.42		0.514
16	CP288	86	Prod	1093	78	2001	22	Universitätsklinikum Schleswig-Holstein	DE001	World	9119	Measurements	0	5855	MEASUREMENTS	Measurements	21		47784	Skin discolouration	0		196778	5	2020-07-14 06:47:03	2020-07-14 06:47:03	2020-07-17 12:54:26	DE001		4.41		3.063		1.355		4.307		0.111		4.418		0		0.539		0.525		0.375
16	CP288	86	Prod	1093	78	2001	22	Universitätsklinikum Schleswig-Holstein	DE001	World	9119	Measurements	0	5855	MEASUREMENTS	Measurements	21		47784	Skin discolouration	0		196779	6	2020-07-14 06:47:03	2020-07-14 06:47:03	2020-07-17 12:54:26	DE001		14.53		1.531		13		1.861		12.67		2.042		12.49		0.016		0.963		1.419
16	CP288	86	Prod	1093	78	2001	22	Universitätsklinikum Schleswig-Holstein	DE001	World	9119	Measurements	0	5855	MEASUREMENTS	Measurements	21		47784	Skin discolouration	0		196780	7	2020-07-14 06:47:03	2020-07-14 06:47:03	2020-07-17 12:54:26	DE001		8.45		1.971		6.487		3.315		5.143		5.31		3.148		0		0		0.001
16	CP288	86	Prod	1093	78	2001	22	Universitätsklinikum Schleswig-Holstein	DE001	World	9119	Measurements	0	5855	MEASUREMENTS	Measurements	21		47784	Skin discolouration	0		196781	8	2020-07-14 06:47:03	2020-07-14 06:47:03	2020-07-17 12:54:26	DE001		7.03		3.447		3.59		4.677		2.36		4.738		2.299		0.7		0.717		1.154
16	CP288	86	Prod	1093	78	2001	22	Universitätsklinikum Schleswig-Holstein	DE001	World	9119	Measurements	0	5855	MEASUREMENTS	Measurements	21		47784	Skin discolouration	0		196782	9	2020-07-14 06:47:03	2020-07-14 06:47:03	2020-07-17 12:54:26	DE001		4.07		1.276		2.803		1.277		2.803		1.313		2.767		0		0.011		0.333
16	CP288	86	Prod	1093	78	2001	22	Universitätsklinikum Schleswig-Holstein	DE001	World	9119	Measurements	0	5855	MEASUREMENTS	Measurements	21		47784	Skin discolouration	0		196783	10	2020-07-14 06:47:03	2020-07-14 06:47:03	2020-07-17 12:54:26	DE001		1.94		1.662		0.278		1.67		0.271		1.67		0.271		0.135		0.218		0.554
16	CP288	86	Prod	1093	78	2001	22	Universitätsklinikum Schleswig-Holstein	DE001	World	9119	Measurements	0	5855	MEASUREMENTS	Measurements	21		47784	Skin discolouration	0		196784	11	2020-07-14 06:47:03	2020-07-14 06:47:03	2020-07-17 12:54:26	DE001		1.64		0.857		0.785		0.857		0.785		0.857		0.785		0.049		0.051		0.107
16	CP288	86	Prod	1093	78	2001	22	Universitätsklinikum Schleswig-Holstein	DE001	World	9119	Measurements	0	5855	MEASUREMENTS	Measurements	21		47784	Skin discolouration	0		196785	12	2020-07-14 06:47:03	2020-07-14 06:47:03	2020-07-17 12:54:26	DE001		6.9		2.703		4.201		2.952		3.952		2.952		3.952		0.301		0.224		0.33
16	CP288	86	Prod	1093	78	2001	22	Universitätsklinikum Schleswig-Holstein	DE001	World	9119	Measurements	0	5855	MEASUREMENTS	Measurements	21		47784	Skin discolouration	0		196786	13	2020-07-14 06:47:03	2020-07-14 06:47:03	2020-07-17 12:54:26	DE001		29.14		3.515		25.62		4.9		24.24		8.234		20.9		0.855		3.313		3.308
16	CP288	86	Prod	1093	78	2001	22	Universitätsklinikum Schleswig-Holstein	DE001	World	9119	Measurements	0	5855	MEASUREMENTS	Measurements	21		47784	Skin discolouration	0		196787	14	2020-07-14 06:47:03	2020-07-14 06:47:03	2020-07-17 12:54:26	DE001		24.78		3.452		21.33		5.208		19.57		6.994		17.79		0.316		3.488		3.593
16	CP288	86	Prod	1093	78	2001	22	Universitätsklinikum Schleswig-Holstein	DE001	World	9119	Measurements	0	5855	MEASUREMENTS	Measurements	21		47784	Skin discolouration	0		196788	15	2020-07-14 06:47:03	2020-07-14 06:47:03	2020-07-17 12:54:26	DE001		9.06		0.964		8.101		0.986		8.079		1.272		7.793		0		0		0
16	CP288	86	Prod	1093	78	2001	22	Universitätsklinikum Schleswig-Holstein	DE001	World	9119	Measurements	0	5855	MEASUREMENTS	Measurements	21		47784	Skin discolouration	0		196789	16	2020-07-14 06:47:03	2020-07-14 06:47:03	2020-07-17 12:54:26	DE001		34.43		4.301		30.13		4.988		29.45		5.805		28.63		1.028		1.898		1.986
16	CP288	86	Prod	1093	78	2001	22	Universitätsklinikum Schleswig-Holstein	DE001	World	9119	Measurements	0	5855	MEASUREMENTS	Measurements	21		47784	Skin discolouration	0		196790	17	2020-07-14 06:47:03	2020-07-14 06:47:03	2020-07-17 12:54:26	DE001		1.31		1.3		0.014		1.306		0.009		1.306		0.009		0.027		0.096		0.254
16	CP288	86	Prod	1093	78	2001	22	Universitätsklinikum Schleswig-Holstein	DE001	World	9119	Measurements	0	5855	MEASUREMENTS	Measurements	21		47784	Skin discolouration	0		196791	18	2020-07-14 06:47:03	2020-07-14 06:47:03	2020-07-17 12:54:26	DE001		21.54		3.923		17.62		5.265		16.28		5.747		15.8		1.035		1.849		1.916
16	CP288	86	Prod	1093	78	2001	22	Universitätsklinikum Schleswig-Holstein	DE001	World	9119	Measurements	0	5855	MEASUREMENTS	Measurements	21		47784	Skin discolouration	0		196792	19	2020-07-14 06:47:03	2020-07-14 06:47:03	2020-07-17 12:54:26	DE001		80.43		6.418		74.01		11.89		68.54		17.18		63.25		0.212		0.973		6.705
16	CP288	86	Prod	1093	78	2001	22	Universitätsklinikum Schleswig-Holstein	DE001	World	9119	Measurements	0	5855	MEASUREMENTS	Measurements	21		47784	Skin discolouration	0		196793	20	2020-07-14 06:47:03	2020-07-14 06:47:03	2020-07-17 12:54:26	DE001		20.4		4.281		16.12		5.722		14.68		6.252		14.15		1.528		1.005		0.681
16	CP288	86	Prod	1093	78	2001	22	Universitätsklinikum Schleswig-Holstein	DE001	World	9119	Measurements	0	5855	MEASUREMENTS	Measurements	21		47784	Skin discolouration	0		196794	21	2020-07-14 06:47:03	2020-07-14 06:47:03	2020-07-17 12:54:26	DE001		9.35		4.341		5.017		6.889		2.469		8.498		0.86		0		0		0.142
16	CP288	86	Prod	1093	78	2001	22	Universitätsklinikum Schleswig-Holstein	DE001	World	9119	Measurements	0	5855	MEASUREMENTS	Measurements	21		47784	Skin discolouration	0		196795	22	2020-07-14 06:47:03	2020-07-14 06:47:03	2020-07-17 12:54:26	DE001		4.75		3.413		1.34		3.963		0.79		3.969		0.783		0.313		0.333		0.564
16	CP288	86	Prod	1093	78	2001	22	Universitätsklinikum Schleswig-Holstein	DE001	World	9119	Measurements	0	5855	MEASUREMENTS	Measurements	21		47784	Skin discolouration	0		196796	23	2020-07-14 06:47:03	2020-07-14 06:47:03	2020-07-17 12:54:26	DE001		17.46		4.964		12.5		7.674		9.793		10.57		6.889		4.384		3.961		2.163
16	CP288	86	Prod	1093	78	2001	22	Universitätsklinikum Schleswig-Holstein	DE001	World	9119	Measurements	0	5855	MEASUREMENTS	Measurements	21		47784	Skin discolouration	0		196797	24	2020-07-14 06:47:03	2020-07-14 06:47:03	2020-07-17 12:54:26	DE001		16.22		4.721		11.5		6.751		9.476		8.294		7.934		0.68		3.669		3.892
16	CP288	86	Prod	1093	78	2001	22	Universitätsklinikum Schleswig-Holstein	DE001	World	9119	Measurements	0	5855	MEASUREMENTS	Measurements	21		47784	Skin discolouration	0		196798	25	2020-07-14 06:47:03	2020-07-14 06:47:03	2020-07-17 12:54:26	DE001		16.6		3.502		13.1		5.705		10.89		7.612		8.99		0.006		0.814		2.764
16	CP288	86	Prod	1093	78	2001	22	Universitätsklinikum Schleswig-Holstein	DE001	World	9119	Measurements	0	5855	MEASUREMENTS	Measurements	21		47784	Skin discolouration	0		196799	26	2020-07-14 06:47:03	2020-07-14 06:47:03	2020-07-17 12:54:26	DE001		5.1		4.183		0.918		4.737		0.363		4.895		0.206		0.568		0.618		0.593
16	CP288	86	Prod	1093	78	2001	22	Universitätsklinikum Schleswig-Holstein	DE001	World	9119	Measurements	0	5855	MEASUREMENTS	Measurements	21		47784	Skin discolouration	0		196800	27	2020-07-14 06:47:03	2020-07-14 06:47:03	2020-07-17 12:54:26	DE001		4.18		1.805		2.383		1.874		2.314		1.894		2.295		1.229		0.611		0.617
16	CP288	86	Prod	1093	78	2001	22	Universitätsklinikum Schleswig-Holstein	DE001	World	9119	Measurements	0	5855	MEASUREMENTS	Measurements	21		47784	Skin discolouration	0		196801	28	2020-07-14 06:47:03	2020-07-14 06:47:03	2020-07-17 12:54:26	DE001		5.21		2.055		3.165		2.716		2.504		3.039		2.18		0.462		0.257		0.644
16	CP288	86	Prod	1093	78	2001	22	Universitätsklinikum Schleswig-Holstein	DE001	World	9119	Measurements	0	5855	MEASUREMENTS	Measurements	21		47784	Skin discolouration	0		196802	29	2020-07-14 06:47:03	2020-07-14 06:47:03	2020-07-17 12:54:26	DE001		9.14		5.37		3.773		7.345		1.797		7.724		1.418		0.001		0.005		0.132
16	CP288	86	Prod	1093	78	2001	22	Universitätsklinikum Schleswig-Holstein	DE001	World	9119	Measurements	0	5855	MEASUREMENTS	Measurements	21		47784	Skin discolouration	0		196803	30	2020-07-14 06:47:03	2020-07-14 06:47:03	2020-07-17 12:54:26	DE001		2.11		1.635		0.477		1.908		0.204		2.044		0.069		0.006		0.026		0.291
16	CP288	86	Prod	1093	78	2001	22	Universitätsklinikum Schleswig-Holstein	DE001	World	9119	Measurements	0	5855	MEASUREMENTS	Measurements	21		47784	Skin discolouration	0		196804	31	2020-07-14 06:47:03	2020-07-14 06:47:03	2020-07-17 12:54:26	DE001		17.3		2.876		14.42		4.07		13.23		4.788		12.51		0.481		0.549		0.531
16	CP288	86	Prod	1093	78	2001	22	Universitätsklinikum Schleswig-Holstein	DE001	World	9119	Measurements	0	5855	MEASUREMENTS	Measurements	21		47784	Skin discolouration	0		196805	32	2020-07-14 06:47:03	2020-07-14 06:47:03	2020-07-17 12:54:26	DE001		15.85		4.526		11.33		7.398		8.459		7.618		8.238		0.627		0.504		0.979
16	CP288	86	Prod	1093	78	2001	22	Universitätsklinikum Schleswig-Holstein	DE001	World	9119	Measurements	0	5855	MEASUREMENTS	Measurements	21		47784	Skin discolouration	0		196806	33	2020-07-14 06:47:03	2020-07-14 06:47:03	2020-07-17 12:54:26	DE001		6.04		4.071		1.972		5.166		0.876		5.268		0.774		1.357		0.954		0.943
16	CP288	86	Prod	1093	78	2001	22	Universitätsklinikum Schleswig-Holstein	DE001	World	9119	Measurements	0	5855	MEASUREMENTS	Measurements	21		47784	Skin discolouration	0		196807	34	2020-07-14 06:47:03	2020-07-14 06:47:03	2020-07-17 12:54:26	DE001		17.23		1.398		15.83		1.559		15.67		2.636		14.59		0		0		0
16	CP288	86	Prod	1093	78	2001	22	Universitätsklinikum Schleswig-Holstein	DE001	World	9119	Measurements	0	5855	MEASUREMENTS	Measurements	21		47784	Skin discolouration	0		196808	35	2020-07-14 06:47:03	2020-07-14 06:47:03	2020-07-17 12:54:26	DE001		1.33		1.327		0.008		1.335		0		1.335		0		0.113		0.152		0.181
16	CP288	86	Prod	1093	78	2001	22	Universitätsklinikum Schleswig-Holstein	DE001	World	9119	Measurements	0	5855	MEASUREMENTS	Measurements	21		47784	Skin discolouration	0		196809	36	2020-07-14 06:47:03	2020-07-14 06:47:03	2020-07-17 12:54:26	DE001		10.58		0.851		9.734		0.861		9.725		0.861		9.725		0.046		0.009		1.015
16	CP288	86	Prod	1093	78	2001	22	Universitätsklinikum Schleswig-Holstein	DE001	World	9119	Measurements	0	5855	MEASUREMENTS	Measurements	21		47784	Skin discolouration	0		196810	37	2020-07-14 06:47:03	2020-07-14 06:47:03	2020-07-17 12:54:26	DE001		10.65		2.929		7.73		3.097		7.562		3.126		7.533		0.358		0.235		0.515
16	CP288	86	Prod	1093	78	2001	22	Universitätsklinikum Schleswig-Holstein	DE001	World	9119	Measurements	0	5855	MEASUREMENTS	Measurements	21		47784	Skin discolouration	0		196811	38	2020-07-14 06:47:03	2020-07-14 06:47:03	2020-07-17 12:54:26	DE001		5.64		2.439		3.203		2.763		2.879		2.977		2.666		0.246		0.316		0.479
16	CP288	86	Prod	1093	78	2001	22	Universitätsklinikum Schleswig-Holstein	DE001	World	9119	Measurements	0	5855	MEASUREMENTS	Measurements	21		47784	Skin discolouration	0		196812	39	2020-07-14 06:47:03	2020-07-14 06:47:03	2020-07-17 12:54:26	DE001		30.07		3.808		26.27		6.631		23.44		10.67		19.4		0.002		1.669		6.537
16	CP288	86	Prod	1093	78	2001	22	Universitätsklinikum Schleswig-Holstein	DE001	World	9119	Measurements	0	5855	MEASUREMENTS	Measurements	21		47784	Skin discolouration	0		196813	40	2020-07-14 06:47:03	2020-07-14 06:47:03	2020-07-17 12:54:26	DE001		8.39		2.911		5.48		3.638		4.754		3.68		4.712		0.371		0.272		0.86
16	CP288	86	Prod	1093	78	2001	22	Universitätsklinikum Schleswig-Holstein	DE001	World	9119	Measurements	0	5855	MEASUREMENTS	Measurements	21		47784	Skin discolouration	0		196814	41	2020-07-14 06:47:03	2020-07-14 06:47:03	2020-07-17 12:54:26	DE001		11.95		2.16		9.792		2.241		9.711		2.417		9.535		0		0		0
16	CP288	86	Prod	1093	78	2001	22	Universitätsklinikum Schleswig-Holstein	DE001	World	9119	Measurements	0	5855	MEASUREMENTS	Measurements	21		47784	Skin discolouration	0		196815	42	2020-07-14 06:47:03	2020-07-14 06:47:03	2020-07-17 12:54:26	DE001		6.48		1.811		4.677		1.884		4.604		1.884		4.604		0.417		0.425		1.894
16	CP288	86	Prod	1093	78	2001	22	Universitätsklinikum Schleswig-Holstein	DE001	World	9119	Measurements	0	5855	MEASUREMENTS	Measurements	21		47784	Skin discolouration	0		196816	43	2020-07-14 06:47:03	2020-07-14 06:47:03	2020-07-17 12:54:26	DE001		9.11		2.93		6.19		4.373		4.747		5.661		3.459		0.001		0.01		0.178
16	CP288	86	Prod	1094	78	2002	22	Universitätsklinikum Schleswig-Holstein	DE001	World	9150	Measurements	0	5855	MEASUREMENTS	Measurements	21		47844	Skin discolouration	0		131148	1	2020-07-14 06:46:56	2020-07-14 06:46:56	2020-07-17 12:54:26	DE001		0.3		0.309		0		0.309		0		0.309		0		0.056		0.034		0.023
16	CP288	86	Prod	1094	78	2002	22	Universitätsklinikum Schleswig-Holstein	DE001	World	9150	Measurements	0	5855	MEASUREMENTS	Measurements	21		47844	Skin discolouration	0		196685	2	2020-07-14 06:46:56	2020-07-14 06:46:56	2020-07-17 12:54:26	DE001		1.12		0.841		0.288		0.872		0.257		0.872		0.257		0.48		0.16		0.033
16	CP288	86	Prod	1094	78	2002	22	Universitätsklinikum Schleswig-Holstein	DE001	World	9150	Measurements	0	5855	MEASUREMENTS	Measurements	21		47844	Skin discolouration	0		196686	3	2020-07-14 06:46:56	2020-07-14 06:46:56	2020-07-17 12:54:26	DE001		0.32		0.303		0.025		0.328		0		0.328		0		0.119		0.119		0.008
16	CP288	86	Prod	1094	78	2002	22	Universitätsklinikum Schleswig-Holstein	DE001	World	9150	Measurements	0	5855	MEASUREMENTS	Measurements	21		47844	Skin discolouration	0		196687	4	2020-07-14 06:46:56	2020-07-14 06:46:56	2020-07-17 12:54:26	DE001		2.37		0.246		2.125		0.246		2.125		0.246		2.125		0		0		0.045
16	CP288	86	Prod	1094	78	2002	22	Universitätsklinikum Schleswig-Holstein	DE001	World	9150	Measurements	0	5855	MEASUREMENTS	Measurements	21		47844	Skin discolouration	0		196688	5	2020-07-14 06:46:56	2020-07-14 06:46:56	2020-07-17 12:54:26	DE001		0.63		0.533		0.099		0.632		0		0.632		0		0.006		0.003		0.002
16	CP288	86	Prod	1094	78	2002	22	Universitätsklinikum Schleswig-Holstein	DE001	World	9150	Measurements	0	5855	MEASUREMENTS	Measurements	21		47844	Skin discolouration	0		196689	6	2020-07-14 06:46:56	2020-07-14 06:46:56	2020-07-17 12:54:26	DE001		0.87		0.772		0.098		0.87		0		0.87		0		0.155		0.466		0.08
16	CP288	86	Prod	1094	78	2002	22	Universitätsklinikum Schleswig-Holstein	DE001	World	9150	Measurements	0	5855	MEASUREMENTS	Measurements	21		47844	Skin discolouration	0		196690	7	2020-07-14 06:46:56	2020-07-14 06:46:56	2020-07-17 12:54:26	DE001		0.44		0.396		0.047		0.443		0		0.443		0		0		0.209		0.126
16	CP288	86	Prod	1094	78	2002	22	Universitätsklinikum Schleswig-Holstein	DE001	World	9150	Measurements	0	5855	MEASUREMENTS	Measurements	21		47844	Skin discolouration	0		196691	8	2020-07-14 06:46:56	2020-07-14 06:46:56	2020-07-17 12:54:26	DE001		0.1		0.106		0		0.106		0		0.106		0		0.016		0.004		0.001
16	CP288	86	Prod	1094	78	2002	22	Universitätsklinikum Schleswig-Holstein	DE001	World	9150	Measurements	0	5855	MEASUREMENTS	Measurements	21		47844	Skin discolouration	0		196692	9	2020-07-14 06:46:56	2020-07-14 06:46:56	2020-07-17 12:54:26	DE001		0.32		0.304		0.021		0.326		0		0.326		0		0.076		0.005		0.008
16	CP288	86	Prod	1094	78	2002	22	Universitätsklinikum Schleswig-Holstein	DE001	World	9150	Measurements	0	5855	MEASUREMENTS	Measurements	21		47844	Skin discolouration	0		196693	10	2020-07-14 06:46:56	2020-07-14 06:46:56	2020-07-17 12:54:26	DE001		0.47		0.449		0.023		0.473		0		0.473		0		0.198		0.11		0.017
16	CP288	86	Prod	1094	78	2002	22	Universitätsklinikum Schleswig-Holstein	DE001	World	9150	Measurements	0	5855	MEASUREMENTS	Measurements	21		47844	Skin discolouration	0		196694	11	2020-07-14 06:46:56	2020-07-14 06:46:56	2020-07-17 12:54:26	DE001		0.83		0.826		0.01		0.836		0		0.836		0		0		0.257		0.281
16	CP288	86	Prod	1095	78	2003	22	Universitätsklinikum Schleswig-Holstein	DE001	World	9181	Measurements	0	5855	MEASUREMENTS	Measurements	21		47904	Skin discolouration	0		131228	1	2020-07-14 06:47:03	2020-07-14 06:47:03	2020-07-17 12:54:26	DE001		44.19		2.377		41.81		6.218		37.97		10.27		33.92		0		0		0.006
16	CP288	86	Prod	1095	78	2003	22	Universitätsklinikum Schleswig-Holstein	DE001	World	9181	Measurements	0	5855	MEASUREMENTS	Measurements	21		47904	Skin discolouration	0		196817	2	2020-07-14 06:47:03	2020-07-14 06:47:03	2020-07-17 12:54:26	DE001		41.98		4.131		37.85		8.995		32.99		15.1		26.88		0		0		0
16	CP288	86	Prod	1095	78	2003	22	Universitätsklinikum Schleswig-Holstein	DE001	World	9181	Measurements	0	5855	MEASUREMENTS	Measurements	21		47904	Skin discolouration	0		196818	3	2020-07-14 06:47:03	2020-07-14 06:47:03	2020-07-17 12:54:26	DE001		4.96		2.098		2.87		3.084		1.884		3.339		1.629		0		0		0.005
16	CP288	86	Prod	1095	78	2003	22	Universitätsklinikum Schleswig-Holstein	DE001	World	9181	Measurements	0	5855	MEASUREMENTS	Measurements	21		47904	Skin discolouration	0		196819	4	2020-07-14 06:47:03	2020-07-14 06:47:03	2020-07-17 12:54:26	DE001		30.82		3.419		27.4		7.735		23.08		10.93		19.88		0		0.01		0.012
16	CP288	86	Prod	1095	78	2003	22	Universitätsklinikum Schleswig-Holstein	DE001	World	9181	Measurements	0	5855	MEASUREMENTS	Measurements	21		47904	Skin discolouration	0		196820	5	2020-07-14 06:47:03	2020-07-14 06:47:03	2020-07-17 12:54:26	DE001		21.85		4.369		17.48		8.554		13.3		11.74		10.11		0		0.019		0.038
16	CP288	86	Prod	1095	78	2003	22	Universitätsklinikum Schleswig-Holstein	DE001	World	9181	Measurements	0	5855	MEASUREMENTS	Measurements	21		47904	Skin discolouration	0		196821	6	2020-07-14 06:47:03	2020-07-14 06:47:03	2020-07-17 12:54:26	DE001		8.48		3.131		5.353		4.036		4.449		4.507		3.977		0		0		0
16	CP288	86	Prod	1095	78	2003	22	Universitätsklinikum Schleswig-Holstein	DE001	World	9181	Measurements	0	5855	MEASUREMENTS	Measurements	21		47904	Skin discolouration	0		196822	7	2020-07-14 06:47:03	2020-07-14 06:47:03	2020-07-17 12:54:26	DE001		0		0		0		0		0		0		0		0		0		0
16	CP288	86	Prod	1095	78	2003	22	Universitätsklinikum Schleswig-Holstein	DE001	World	9181	Measurements	0	5855	MEASUREMENTS	Measurements	21		47904	Skin discolouration	0		196823	8	2020-07-14 06:47:03	2020-07-14 06:47:03	2020-07-17 12:54:26	DE001		11.01		1.361		9.652		1.883		9.13		1.939		9.074		0		0		0
16	CP288	86	Prod	1095	78	2003	22	Universitätsklinikum Schleswig-Holstein	DE001	World	9181	Measurements	0	5855	MEASUREMENTS	Measurements	21		47904	Skin discolouration	0		196824	9	2020-07-14 06:47:03	2020-07-14 06:47:03	2020-07-17 12:54:26	DE001		4.21		1.714		2.499		2.314		1.898		2.406		1.806		0		0		0
16	CP288	86	Prod	1095	78	2003	22	Universitätsklinikum Schleswig-Holstein	DE001	World	9181	Measurements	0	5855	MEASUREMENTS	Measurements	21		47904	Skin discolouration	0		196825	10	2020-07-14 06:47:03	2020-07-14 06:47:03	2020-07-17 12:54:26	DE001		19.39		4.137		15.25		7.625		11.76		9.493		9.898		0		0		0
16	CP288	86	Prod	1095	78	2003	22	Universitätsklinikum Schleswig-Holstein	DE001	World	9181	Measurements	0	5855	MEASUREMENTS	Measurements	21		47904	Skin discolouration	0		196826	11	2020-07-14 06:47:03	2020-07-14 06:47:03	2020-07-17 12:54:26	DE001		12.26		1.071		11.19		1.521		10.74		1.89		10.37		0		0.055		0.382
16	CP288	86	Prod	1095	78	2003	22	Universitätsklinikum Schleswig-Holstein	DE001	World	9181	Measurements	0	5855	MEASUREMENTS	Measurements	21		47904	Skin discolouration	0		196827	12	2020-07-14 06:47:03	2020-07-14 06:47:03	2020-07-17 12:54:26	DE001		21.3		1.925		19.37		4.128		17.17		6.045		15.25		0		0		0
16	CP288	86	Prod	1095	78	2003	22	Universitätsklinikum Schleswig-Holstein	DE001	World	9181	Measurements	0	5855	MEASUREMENTS	Measurements	21		47904	Skin discolouration	0		196828	13	2020-07-14 06:47:03	2020-07-14 06:47:03	2020-07-17 12:54:26	DE001		13.63		0.811		12.82		0.997		12.63		1.859		11.77		0		0		0.009
16	CP288	86	Prod	1095	78	2003	22	Universitätsklinikum Schleswig-Holstein	DE001	World	9181	Measurements	0	5855	MEASUREMENTS	Measurements	21		47904	Skin discolouration	0		196829	14	2020-07-14 06:47:03	2020-07-14 06:47:03	2020-07-17 12:54:26	DE001		29.68		2.606		27.07		5.623		24.06		10.21		19.46		0		0		0
16	CP288	86	Prod	1095	78	2003	22	Universitätsklinikum Schleswig-Holstein	DE001	World	9181	Measurements	0	5855	MEASUREMENTS	Measurements	21		47904	Skin discolouration	0		196830	15	2020-07-14 06:47:03	2020-07-14 06:47:03	2020-07-17 12:54:26	DE001		44.3		2.034		42.27		4.637		39.67		7.932		36.37		0		0.177		0.741
16	CP288	86	Prod	1095	78	2003	22	Universitätsklinikum Schleswig-Holstein	DE001	World	9181	Measurements	0	5855	MEASUREMENTS	Measurements	21		47904	Skin discolouration	0		196831	16	2020-07-14 06:47:03	2020-07-14 06:47:03	2020-07-17 12:54:26	DE001		21.23		3.462		17.76		6.104		15.12		8.517		12.71		0		0		0.036
16	CP288	86	Prod	1095	78	2003	22	Universitätsklinikum Schleswig-Holstein	DE001	World	9181	Measurements	0	5855	MEASUREMENTS	Measurements	21		47904	Skin discolouration	0		196832	17	2020-07-14 06:47:03	2020-07-14 06:47:03	2020-07-17 12:54:26	DE001		16.28		3.785		12.49		6.278		10		7.598		8.683		0		0		0
16	CP288	86	Prod	1096	78	2004	22	Universitätsklinikum Schleswig-Holstein	DE001	World	9212	Measurements	0	5855	MEASUREMENTS	Measurements	21		47964	Skin discolouration	0		131308	1	2020-07-14 06:46:59	2020-07-14 06:46:59	2020-07-17 12:54:26	DE001		50.71		4.841		45.87		11.26		39.44		18.7		32.01		0		0.008		0.063
16	CP288	86	Prod	1096	78	2004	22	Universitätsklinikum Schleswig-Holstein	DE001	World	9212	Measurements	0	5855	MEASUREMENTS	Measurements	21		47964	Skin discolouration	0		196725	2	2020-07-14 06:46:59	2020-07-14 06:46:59	2020-07-17 12:54:26	DE001		15.29		9.326		5.972		0.121		15.17		0.26		15.03		0		0		0.076
16	CP288	86	Prod	1096	78	2004	22	Universitätsklinikum Schleswig-Holstein	DE001	World	9212	Measurements	0	5855	MEASUREMENTS	Measurements	21		47964	Skin discolouration	0		196726	3	2020-07-14 06:46:59	2020-07-14 06:46:59	2020-07-17 12:54:26	DE001		12.76		4.376		8.389		7.285		5.48		8.588		4.177		0		0		0
16	CP288	86	Prod	1096	78	2004	22	Universitätsklinikum Schleswig-Holstein	DE001	World	9212	Measurements	0	5855	MEASUREMENTS	Measurements	21		47964	Skin discolouration	0		196727	4	2020-07-14 06:46:59	2020-07-14 06:46:59	2020-07-17 12:54:26	DE001		90.8		6.947		83.86		13.89		76.91		22.63		68.17		0.688		0.689		1.131
16	CP288	86	Prod	1096	78	2004	22	Universitätsklinikum Schleswig-Holstein	DE001	World	9212	Measurements	0	5855	MEASUREMENTS	Measurements	21		47964	Skin discolouration	0		196728	5	2020-07-14 06:46:59	2020-07-14 06:46:59	2020-07-17 12:54:26	DE001		28.03		2.764		25.27		3.812		24.22		3.961		24.07		0.016		0.033		0.189
16	CP288	86	Prod	1096	78	2004	22	Universitätsklinikum Schleswig-Holstein	DE001	World	9212	Measurements	0	5855	MEASUREMENTS	Measurements	21		47964	Skin discolouration	0		196729	6	2020-07-14 06:46:59	2020-07-14 06:46:59	2020-07-17 12:54:26	DE001		20.83		0.364		20.47		0.335		20.5		0.218		20.62		0.076		0.152		0.636
16	CP288	86	Prod	1096	78	2004	22	Universitätsklinikum Schleswig-Holstein	DE001	World	9212	Measurements	0	5855	MEASUREMENTS	Measurements	21		47964	Skin discolouration	0		196730	7	2020-07-14 06:46:59	2020-07-14 06:46:59	2020-07-17 12:54:26	DE001		31.24		7.293		23.94		10.92		20.31		14.49		16.74		0		0		0.005
16	CP288	86	Prod	1096	78	2004	22	Universitätsklinikum Schleswig-Holstein	DE001	World	9212	Measurements	0	5855	MEASUREMENTS	Measurements	21		47964	Skin discolouration	0		196731	8	2020-07-14 06:46:59	2020-07-14 06:46:59	2020-07-17 12:54:26	DE001		73.82		7.449		66.37		14.23		59.59		22.14		51.67		0.094		0.319		3.341
16	CP288	86	Prod	1096	78	2004	22	Universitätsklinikum Schleswig-Holstein	DE001	World	9212	Measurements	0	5855	MEASUREMENTS	Measurements	21		47964	Skin discolouration	0		196732	9	2020-07-14 06:46:59	2020-07-14 06:46:59	2020-07-17 12:54:26	DE001		33.23		2.223		31		4.511		28.72		7.871		25.36		0.026		0.217		0.872
16	CP288	86	Prod	1096	78	2004	22	Universitätsklinikum Schleswig-Holstein	DE001	World	9212	Measurements	0	5855	MEASUREMENTS	Measurements	21		47964	Skin discolouration	0		196733	10	2020-07-14 06:46:59	2020-07-14 06:46:59	2020-07-17 12:54:26	DE001		26.83		3.945		22.89		7.354		19.48		11.89		14.94		0.017		0.367		0.956
16	CP288	86	Prod	1096	78	2004	22	Universitätsklinikum Schleswig-Holstein	DE001	World	9212	Measurements	0	5855	MEASUREMENTS	Measurements	21		47964	Skin discolouration	0		196734	11	2020-07-14 06:46:59	2020-07-14 06:46:59	2020-07-17 12:54:26	DE001		25.19		16.74		8.452		0.636		24.56		0.411		24.78		0.001		0		0.124
16	CP288	86	Prod	1096	78	2004	22	Universitätsklinikum Schleswig-Holstein	DE001	World	9212	Measurements	0	5855	MEASUREMENTS	Measurements	21		47964	Skin discolouration	0		196735	12	2020-07-14 06:46:59	2020-07-14 06:46:59	2020-07-17 12:54:26	DE001		70.77		7.37		63.4		15.04		55.73		23.69		47.08		0		0		0
16	CP288	86	Prod	1096	78	2004	22	Universitätsklinikum Schleswig-Holstein	DE001	World	9212	Measurements	0	5855	MEASUREMENTS	Measurements	21		47964	Skin discolouration	0		196736	13	2020-07-14 06:46:59	2020-07-14 06:46:59	2020-07-17 12:54:26	DE001		33.2		5.792		27.41		9.244		23.96		12.75		20.45		0.007		0.057		0.164
16	CP288	86	Prod	1096	78	2004	22	Universitätsklinikum Schleswig-Holstein	DE001	World	9212	Measurements	0	5855	MEASUREMENTS	Measurements	21		47964	Skin discolouration	0		196737	14	2020-07-14 06:46:59	2020-07-14 06:46:59	2020-07-17 12:54:26	DE001		58.04		5.381		52.66		10.83		47.2		19.93		38.1		0		0		0
16	CP288	86	Prod	1096	78	2004	22	Universitätsklinikum Schleswig-Holstein	DE001	World	9212	Measurements	0	5855	MEASUREMENTS	Measurements	21		47964	Skin discolouration	0		196738	15	2020-07-14 06:46:59	2020-07-14 06:46:59	2020-07-17 12:54:26	DE001		62.18		3.484		58.69		7.61		54.57		14.51		47.66		0		0.007		0.775
16	CP288	86	Prod	1097	78	2005	22	Universitätsklinikum Schleswig-Holstein	DE001	World	9243	Measurements	0	5855	MEASUREMENTS	Measurements	21		48024	Skin discolouration	0		131339	1	2020-07-14 06:47:08	2020-07-14 06:47:08	2020-07-17 12:54:26	DE001		19.23		1.388		17.84		2.639		16.59		5.581		13.65		0		0		0
16	CP288	86	Prod	1097	78	2005	22	Universitätsklinikum Schleswig-Holstein	DE001	World	9243	Measurements	0	5855	MEASUREMENTS	Measurements	21		48024	Skin discolouration	0		196903	2	2020-07-14 06:47:08	2020-07-14 06:47:08	2020-07-17 12:54:26	DE001		12.25		4.853		7.4		8.212		4.041		10.82		1.43		0		0.001		0.185
16	CP288	86	Prod	1097	78	2005	22	Universitätsklinikum Schleswig-Holstein	DE001	World	9243	Measurements	0	5855	MEASUREMENTS	Measurements	21		48024	Skin discolouration	0		196904	3	2020-07-14 06:47:08	2020-07-14 06:47:08	2020-07-17 12:54:26	DE001		5.2		2.37		2.838		3.508		1.7		3.796		1.412		0		0.003		0.096
16	CP288	86	Prod	1097	78	2005	22	Universitätsklinikum Schleswig-Holstein	DE001	World	9243	Measurements	0	5855	MEASUREMENTS	Measurements	21		48024	Skin discolouration	0		196905	4	2020-07-14 06:47:08	2020-07-14 06:47:08	2020-07-17 12:54:26	DE001		14.62		3.331		11.29		7.765		6.856		10.5		4.117		0.001		0.008		0.384
16	CP288	86	Prod	1097	78	2005	22	Universitätsklinikum Schleswig-Holstein	DE001	World	9243	Measurements	0	5855	MEASUREMENTS	Measurements	21		48024	Skin discolouration	0		196906	5	2020-07-14 06:47:08	2020-07-14 06:47:08	2020-07-17 12:54:26	DE001		52.66		7.178		45.48		15.46		37.2		25.24		27.42		0		0		0
16	CP288	86	Prod	1097	78	2005	22	Universitätsklinikum Schleswig-Holstein	DE001	World	9243	Measurements	0	5855	MEASUREMENTS	Measurements	21		48024	Skin discolouration	0		196907	6	2020-07-14 06:47:08	2020-07-14 06:47:08	2020-07-17 12:54:26	DE001		28.49		3.256		25.23		5.9		22.59		9.225		19.26		0		0.009		0.025
16	CP288	86	Prod	1097	78	2005	22	Universitätsklinikum Schleswig-Holstein	DE001	World	9243	Measurements	0	5855	MEASUREMENTS	Measurements	21		48024	Skin discolouration	0		196908	7	2020-07-14 06:47:08	2020-07-14 06:47:08	2020-07-17 12:54:26	DE001		33.8		6.072		27.73		11.2		22.6		16.71		17.09		0		0.005		0.383
16	CP288	86	Prod	1097	78	2005	22	Universitätsklinikum Schleswig-Holstein	DE001	World	9243	Measurements	0	5855	MEASUREMENTS	Measurements	21		48024	Skin discolouration	0		196909	8	2020-07-14 06:47:08	2020-07-14 06:47:08	2020-07-17 12:54:26	DE001		8.12		3.144		4.98		4.358		3.766		4.55		3.574		0		0.035		0.071
16	CP288	86	Prod	1097	78	2005	22	Universitätsklinikum Schleswig-Holstein	DE001	World	9243	Measurements	0	5855	MEASUREMENTS	Measurements	21		48024	Skin discolouration	0		196910	9	2020-07-14 06:47:08	2020-07-14 06:47:08	2020-07-17 12:54:26	DE001		27.04		4.736		22.31		8.815		18.23		11.13		15.91		0		0		0.09
16	CP288	86	Prod	1097	78	2005	22	Universitätsklinikum Schleswig-Holstein	DE001	World	9243	Measurements	0	5855	MEASUREMENTS	Measurements	21		48024	Skin discolouration	0		196911	10	2020-07-14 06:47:08	2020-07-14 06:47:08	2020-07-17 12:54:26	DE001		11.44		3.264		8.176		5		6.44		6.367		5.073		0.013		0.068		0.206
16	CP288	86	Prod	1097	78	2005	22	Universitätsklinikum Schleswig-Holstein	DE001	World	9243	Measurements	0	5855	MEASUREMENTS	Measurements	21		48024	Skin discolouration	0		196912	11	2020-07-14 06:47:08	2020-07-14 06:47:08	2020-07-17 12:54:26	DE001		16.07		1.399		14.67		1.754		14.32		1.799		14.27		0		0		0
16	CP288	86	Prod	1097	78	2005	22	Universitätsklinikum Schleswig-Holstein	DE001	World	9243	Measurements	0	5855	MEASUREMENTS	Measurements	21		48024	Skin discolouration	0		196913	12	2020-07-14 06:47:08	2020-07-14 06:47:08	2020-07-17 12:54:26	DE001		29.61		5.161		24.45		11.07		18.54		17.99		11.62		0		0		0.003
16	CP288	86	Prod	1097	78	2005	22	Universitätsklinikum Schleswig-Holstein	DE001	World	9243	Measurements	0	5855	MEASUREMENTS	Measurements	21		48024	Skin discolouration	0		196914	13	2020-07-14 06:47:08	2020-07-14 06:47:08	2020-07-17 12:54:26	DE001		17.8		5.897		11.9		9.315		8.488		11.58		6.215		0.038		0.105		0.452
16	CP288	86	Prod	1097	78	2005	22	Universitätsklinikum Schleswig-Holstein	DE001	World	9243	Measurements	0	5855	MEASUREMENTS	Measurements	21		48024	Skin discolouration	0		196915	14	2020-07-14 06:47:08	2020-07-14 06:47:08	2020-07-17 12:54:26	DE001		15.03		3.785		11.24		5.272		9.759		6.73		8.301		0.075		0.232		1.116
16	CP288	86	Prod	1097	78	2005	22	Universitätsklinikum Schleswig-Holstein	DE001	World	9243	Measurements	0	5855	MEASUREMENTS	Measurements	21		48024	Skin discolouration	0		196916	15	2020-07-14 06:47:08	2020-07-14 06:47:08	2020-07-17 12:54:26	DE001		54.52		2.702		51.82		6.262		48.26		11.85		42.66		0		0		0.034
16	CP288	86	Prod	1097	78	2005	22	Universitätsklinikum Schleswig-Holstein	DE001	World	9243	Measurements	0	5855	MEASUREMENTS	Measurements	21		48024	Skin discolouration	0		196917	16	2020-07-14 06:47:08	2020-07-14 06:47:08	2020-07-17 12:54:26	DE001		35.59		2.482		33.1		4.673		30.91		8.455		27.13		0		0		0
16	CP288	86	Prod	1097	78	2005	22	Universitätsklinikum Schleswig-Holstein	DE001	World	9243	Measurements	0	5855	MEASUREMENTS	Measurements	21		48024	Skin discolouration	0		196918	17	2020-07-14 06:47:08	2020-07-14 06:47:08	2020-07-17 12:54:26	DE001		14.16		4.101		10.06		7.186		6.982		9.66		4.508		2.936		4.644		2.034
16	CP288	86	Prod	1097	78	2005	22	Universitätsklinikum Schleswig-Holstein	DE001	World	9243	Measurements	0	5855	MEASUREMENTS	Measurements	21		48024	Skin discolouration	0		196919	18	2020-07-14 06:47:08	2020-07-14 06:47:08	2020-07-17 12:54:26	DE001		46.12		6.169		39.95		11.98		34.14		18.66		27.46		0.009		0.41		3.821
16	CP288	86	Prod	1097	78	2005	22	Universitätsklinikum Schleswig-Holstein	DE001	World	9243	Measurements	0	5855	MEASUREMENTS	Measurements	21		48024	Skin discolouration	0		196920	19	2020-07-14 06:47:08	2020-07-14 06:47:08	2020-07-17 12:54:26	DE001		17.02		2.385		14.64		5.495		11.53		10.37		6.649		0		0		0.038
16	CP288	86	Prod	1097	78	2005	22	Universitätsklinikum Schleswig-Holstein	DE001	World	9243	Measurements	0	5855	MEASUREMENTS	Measurements	21		48024	Skin discolouration	0		196921	20	2020-07-14 06:47:08	2020-07-14 06:47:08	2020-07-17 12:54:26	DE001		27.59		5.674		21.92		9.789		17.8		14.52		13.06		0.001		0.009		0.037
16	CP288	86	Prod	1097	78	2005	22	Universitätsklinikum Schleswig-Holstein	DE001	World	9243	Measurements	0	5855	MEASUREMENTS	Measurements	21		48024	Skin discolouration	0		196922	21	2020-07-14 06:47:08	2020-07-14 06:47:08	2020-07-17 12:54:26	DE001		21.05		5.126		15.92		8.567		12.48		13.07		7.98		0.097		0.365		1.11
16	CP288	86	Prod	1097	78	2005	22	Universitätsklinikum Schleswig-Holstein	DE001	World	9243	Measurements	0	5855	MEASUREMENTS	Measurements	21		48024	Skin discolouration	0		196923	22	2020-07-14 06:47:08	2020-07-14 06:47:08	2020-07-17 12:54:26	DE001		23.91		3.602		20.31		9.194		14.72		14.97		8.95		0		0		0
16	CP288	86	Prod	1097	78	2005	22	Universitätsklinikum Schleswig-Holstein	DE001	World	9243	Measurements	0	5855	MEASUREMENTS	Measurements	21		48024	Skin discolouration	0		196924	23	2020-07-14 06:47:08	2020-07-14 06:47:08	2020-07-17 12:54:26	DE001		8.14		2.43		5.711		3.563		4.578		5.94		2.201		0		0.006		0.045
16	CP288	86	Prod	1097	78	2005	22	Universitätsklinikum Schleswig-Holstein	DE001	World	9243	Measurements	0	5855	MEASUREMENTS	Measurements	21		48024	Skin discolouration	0		196925	24	2020-07-14 06:47:08	2020-07-14 06:47:08	2020-07-17 12:54:26	DE001		6.42		1.93		4.495		2.792		3.633		4.804		1.621		0		0		0
16	CP288	86	Prod	1097	78	2005	22	Universitätsklinikum Schleswig-Holstein	DE001	World	9243	Measurements	0	5855	MEASUREMENTS	Measurements	21		48024	Skin discolouration	0		196926	25	2020-07-14 06:47:08	2020-07-14 06:47:08	2020-07-17 12:54:26	DE001		25.13		5.731		19.4		10.58		14.55		14.44		10.68		0.45		0.974		2.866
16	CP288	86	Prod	1097	78	2005	22	Universitätsklinikum Schleswig-Holstein	DE001	World	9243	Measurements	0	5855	MEASUREMENTS	Measurements	21		48024	Skin discolouration	0		196927	26	2020-07-14 06:47:08	2020-07-14 06:47:08	2020-07-17 12:54:26	DE001		15.7		5.085		10.61		9.783		5.921		12.24		3.462		0		0		0
16	CP288	86	Prod	1097	78	2005	22	Universitätsklinikum Schleswig-Holstein	DE001	World	9243	Measurements	0	5855	MEASUREMENTS	Measurements	21		48024	Skin discolouration	0		196928	27	2020-07-14 06:47:08	2020-07-14 06:47:08	2020-07-17 12:54:26	DE001		42.54		5.859		36.69		11.56		30.98		16.35		26.18		0		0		0.015
16	CP288	86	Prod	1097	78	2005	22	Universitätsklinikum Schleswig-Holstein	DE001	World	9243	Measurements	0	5855	MEASUREMENTS	Measurements	21		48024	Skin discolouration	0		196929	28	2020-07-14 06:47:08	2020-07-14 06:47:08	2020-07-17 12:54:26	DE001		5.89		2.638		3.259		3.38		2.517		4.395		1.502		0		0		0
16	CP288	86	Prod	1097	78	2005	22	Universitätsklinikum Schleswig-Holstein	DE001	World	9243	Measurements	0	5855	MEASUREMENTS	Measurements	21		48024	Skin discolouration	0		196930	29	2020-07-14 06:47:08	2020-07-14 06:47:08	2020-07-17 12:54:26	DE001		28.95		2.837		26.12		5.762		23.19		9.192		19.76		0		0		0
16	CP288	86	Prod	1097	78	2005	22	Universitätsklinikum Schleswig-Holstein	DE001	World	9243	Measurements	0	5855	MEASUREMENTS	Measurements	21		48024	Skin discolouration	0		196931	30	2020-07-14 06:47:08	2020-07-14 06:47:08	2020-07-17 12:54:26	DE001		25.42		1.282		24.14		2.249		23.17		4.12		21.3		0		0		0
16	CP288	86	Prod	1097	78	2005	22	Universitätsklinikum Schleswig-Holstein	DE001	World	9243	Measurements	0	5855	MEASUREMENTS	Measurements	21		48024	Skin discolouration	0		196932	31	2020-07-14 06:47:08	2020-07-14 06:47:08	2020-07-17 12:54:26	DE001		0.79		0.676		0.121		0.702		0.096		0.702		0.096		0		0.007		0.017
16	CP288	86	Prod	1097	78	2005	22	Universitätsklinikum Schleswig-Holstein	DE001	World	9243	Measurements	0	5855	MEASUREMENTS	Measurements	21		48024	Skin discolouration	0		196933	32	2020-07-14 06:47:08	2020-07-14 06:47:08	2020-07-17 12:54:26	DE001		7.2		1.948		5.253		2.495		4.706		3.814		3.387		0		0		0
16	CP288	86	Prod	1097	78	2005	22	Universitätsklinikum Schleswig-Holstein	DE001	World	9243	Measurements	0	5855	MEASUREMENTS	Measurements	21		48024	Skin discolouration	0		196934	33	2020-07-14 06:47:08	2020-07-14 06:47:08	2020-07-17 12:54:26	DE001		42.29		6.455		35.84		12.45		29.84		17.26		25.02		0		0		0
16	CP288	86	Prod	1097	78	2005	22	Universitätsklinikum Schleswig-Holstein	DE001	World	9243	Measurements	0	5855	MEASUREMENTS	Measurements	21		48024	Skin discolouration	0		196935	34	2020-07-14 06:47:08	2020-07-14 06:47:08	2020-07-17 12:54:26	DE001		10.98		1.792		9.195		4.508		6.478		7.658		3.328		0		0.001		0.001
16	CP288	86	Prod	1097	78	2005	22	Universitätsklinikum Schleswig-Holstein	DE001	World	9243	Measurements	0	5855	MEASUREMENTS	Measurements	21		48024	Skin discolouration	0		196936	35	2020-07-14 06:47:08	2020-07-14 06:47:08	2020-07-17 12:54:26	DE001		24.75		4.95		19.81		8.437		16.32		10.98		13.77		0		0.394		3.413
16	CP288	86	Prod	1097	78	2005	22	Universitätsklinikum Schleswig-Holstein	DE001	World	9243	Measurements	0	5855	MEASUREMENTS	Measurements	21		48024	Skin discolouration	0		196937	36	2020-07-14 06:47:08	2020-07-14 06:47:08	2020-07-17 12:54:26	DE001		7.39		2.777		4.623		3.976		3.424		4.235		3.165		0		0		0
16	CP288	86	Prod	1097	78	2005	22	Universitätsklinikum Schleswig-Holstein	DE001	World	9243	Measurements	0	5855	MEASUREMENTS	Measurements	21		48024	Skin discolouration	0		196938	37	2020-07-14 06:47:08	2020-07-14 06:47:08	2020-07-17 12:54:26	DE001		11.37		3.862		7.518		5.149		6.23		6.025		5.355		0		0		0.029
16	CP288	86	Prod	1097	78	2005	22	Universitätsklinikum Schleswig-Holstein	DE001	World	9243	Measurements	0	5855	MEASUREMENTS	Measurements	21		48024	Skin discolouration	0		196939	38	2020-07-14 06:47:08	2020-07-14 06:47:08	2020-07-17 12:54:26	DE001		17.11		2.576		14.53		5.138		11.97		8.854		8.259		0		0		0
16	CP288	86	Prod	1097	78	2005	22	Universitätsklinikum Schleswig-Holstein	DE001	World	9243	Measurements	0	5855	MEASUREMENTS	Measurements	21		48024	Skin discolouration	0		196940	39	2020-07-14 06:47:08	2020-07-14 06:47:08	2020-07-17 12:54:26	DE001		28.75		6.309		22.44		12.1		16.64		18.87		9.88		0		0		0
16	CP288	86	Prod	1100	78	2008	22	Universitätsklinikum Schleswig-Holstein	DE001	World	9336	Measurements	0	5855	MEASUREMENTS	Measurements	21		48204	Skin discolouration	0		131628	1	2020-07-14 06:46:59	2020-07-14 06:46:59	2020-07-17 12:54:26	DE001		2.2		1.699		0.505		1.7		0.504		1.99		0.214		0.85		1.212		0.191
16	CP288	86	Prod	1100	78	2008	22	Universitätsklinikum Schleswig-Holstein	DE001	World	9336	Measurements	0	5855	MEASUREMENTS	Measurements	21		48204	Skin discolouration	0		196695	2	2020-07-14 06:46:59	2020-07-14 06:46:59	2020-07-17 12:54:26	DE001		10.38		4.504		5.878		7.675		2.708		8.614		1.768		0.044		0.785		1.493
16	CP288	86	Prod	1100	78	2008	22	Universitätsklinikum Schleswig-Holstein	DE001	World	9336	Measurements	0	5855	MEASUREMENTS	Measurements	21		48204	Skin discolouration	0		196696	3	2020-07-14 06:46:59	2020-07-14 06:46:59	2020-07-17 12:54:26	DE001		12		3.196		8.811		6.566		5.442		9.505		2.503		0		0		0.073
16	CP288	86	Prod	1100	78	2008	22	Universitätsklinikum Schleswig-Holstein	DE001	World	9336	Measurements	0	5855	MEASUREMENTS	Measurements	21		48204	Skin discolouration	0		196697	4	2020-07-14 06:46:59	2020-07-14 06:46:59	2020-07-17 12:54:26	DE001		1.95		1.314		0.644		1.315		0.642		1.532		0.426		1.035		0.421		0.148
16	CP288	86	Prod	1100	78	2008	22	Universitätsklinikum Schleswig-Holstein	DE001	World	9336	Measurements	0	5855	MEASUREMENTS	Measurements	21		48204	Skin discolouration	0		196698	5	2020-07-14 06:46:59	2020-07-14 06:46:59	2020-07-17 12:54:26	DE001		9.72		2.945		6.78		3.585		6.14		4.039		5.686		2.418		2.553		7.279
16	CP288	86	Prod	1100	78	2008	22	Universitätsklinikum Schleswig-Holstein	DE001	World	9336	Measurements	0	5855	MEASUREMENTS	Measurements	21		48204	Skin discolouration	0		196699	6	2020-07-14 06:46:59	2020-07-14 06:46:59	2020-07-17 12:54:26	DE001		5.97		4.945		1.032		5.634		0.344		5.891		0.087		0.206		0.34		0.521
16	CP288	86	Prod	1100	78	2008	22	Universitätsklinikum Schleswig-Holstein	DE001	World	9336	Measurements	0	5855	MEASUREMENTS	Measurements	21		48204	Skin discolouration	0		196700	7	2020-07-14 06:46:59	2020-07-14 06:46:59	2020-07-17 12:54:26	DE001		3.29		2.374		0.923		3.195		0.103		3.29		0.007		0		0.002		0.137
16	CP288	86	Prod	1100	78	2008	22	Universitätsklinikum Schleswig-Holstein	DE001	World	9336	Measurements	0	5855	MEASUREMENTS	Measurements	21		48204	Skin discolouration	0		196701	8	2020-07-14 06:46:59	2020-07-14 06:46:59	2020-07-17 12:54:26	DE001		3.54		2.394		1.155		3.374		0.176		3.547		0.002		0.783		1.303		0.682
16	CP288	86	Prod	1100	78	2008	22	Universitätsklinikum Schleswig-Holstein	DE001	World	9336	Measurements	0	5855	MEASUREMENTS	Measurements	21		48204	Skin discolouration	0		196702	9	2020-07-14 06:46:59	2020-07-14 06:46:59	2020-07-17 12:54:26	DE001		5.74		3.087		2.656		4.531		1.211		5.361		0.382		0.685		1.609		3.858
16	CP288	86	Prod	1100	78	2008	22	Universitätsklinikum Schleswig-Holstein	DE001	World	9336	Measurements	0	5855	MEASUREMENTS	Measurements	21		48204	Skin discolouration	0		196703	10	2020-07-14 06:46:59	2020-07-14 06:46:59	2020-07-17 12:54:26	DE001		4.1		1.939		2.161		2.139		1.962		2.245		1.855		1.988		1.305		3.763
16	CP288	86	Prod	1100	78	2008	22	Universitätsklinikum Schleswig-Holstein	DE001	World	9336	Measurements	0	5855	MEASUREMENTS	Measurements	21		48204	Skin discolouration	0		196704	11	2020-07-14 06:46:59	2020-07-14 06:46:59	2020-07-17 12:54:26	DE001		3.56		2.056		1.51		2.253		1.314		2.555		1.012		1.114		1.431		0.462
16	CP288	86	Prod	1100	78	2008	22	Universitätsklinikum Schleswig-Holstein	DE001	World	9336	Measurements	0	5855	MEASUREMENTS	Measurements	21		48204	Skin discolouration	0		196705	12	2020-07-14 06:46:59	2020-07-14 06:46:59	2020-07-17 12:54:26	DE001		4.28		1.865		2.416		2.247		2.034		2.775		1.505		1.515		1.548		0.765
16	CP288	86	Prod	1100	78	2008	22	Universitätsklinikum Schleswig-Holstein	DE001	World	9336	Measurements	0	5855	MEASUREMENTS	Measurements	21		48204	Skin discolouration	0		196706	13	2020-07-14 06:46:59	2020-07-14 06:46:59	2020-07-17 12:54:26	DE001		3.12		2.77		0.354		3.007		0.116		3.082		0.041		0.017		0.098		0.625
16	CP288	86	Prod	1100	78	2008	22	Universitätsklinikum Schleswig-Holstein	DE001	World	9336	Measurements	0	5855	MEASUREMENTS	Measurements	21		48204	Skin discolouration	0		196707	14	2020-07-14 06:46:59	2020-07-14 06:46:59	2020-07-17 12:54:26	DE001		8.37		3.027		5.347		3.825		4.549		5.214		3.161		3.044		2.11		2.129
16	CP288	86	Prod	1100	78	2008	22	Universitätsklinikum Schleswig-Holstein	DE001	World	9336	Measurements	0	5855	MEASUREMENTS	Measurements	21		48204	Skin discolouration	0		196708	15	2020-07-14 06:46:59	2020-07-14 06:46:59	2020-07-17 12:54:26	DE001		3.86		2.935		0.927		3.505		0.357		3.596		0.267		1.095		1.293		0.659
16	CP288	86	Prod	1100	78	2008	22	Universitätsklinikum Schleswig-Holstein	DE001	World	9336	Measurements	0	5855	MEASUREMENTS	Measurements	21		48204	Skin discolouration	0		196709	16	2020-07-14 06:46:59	2020-07-14 06:46:59	2020-07-17 12:54:26	DE001		3.59		2.736		0.855		3.02		0.571		3.148		0.443		1.092		1.225		0.4
16	CP288	86	Prod	1100	78	2008	22	Universitätsklinikum Schleswig-Holstein	DE001	World	9336	Measurements	0	5855	MEASUREMENTS	Measurements	21		48204	Skin discolouration	0		196710	17	2020-07-14 06:46:59	2020-07-14 06:46:59	2020-07-17 12:54:26	DE001		16.04		4.3		11.74		7.262		8.782		9.199		6.845		5.186		5.168		13.22
16	CP288	86	Prod	1100	78	2008	22	Universitätsklinikum Schleswig-Holstein	DE001	World	9336	Measurements	0	5855	MEASUREMENTS	Measurements	21		48204	Skin discolouration	0		196711	18	2020-07-14 06:46:59	2020-07-14 06:46:59	2020-07-17 12:54:26	DE001		8.84		3.084		5.76		5.934		2.909		7.027		1.816		1.468		2.47		2.099
16	CP288	86	Prod	1100	78	2008	22	Universitätsklinikum Schleswig-Holstein	DE001	World	9336	Measurements	0	5855	MEASUREMENTS	Measurements	21		48204	Skin discolouration	0		196712	19	2020-07-14 06:46:59	2020-07-14 06:46:59	2020-07-17 12:54:26	DE001		1.88		1.187		0.693		1.204		0.676		1.204		0.676		1.015		0.314		0.115
16	CP288	86	Prod	1100	78	2008	22	Universitätsklinikum Schleswig-Holstein	DE001	World	9336	Measurements	0	5855	MEASUREMENTS	Measurements	21		48204	Skin discolouration	0		196713	20	2020-07-14 06:46:59	2020-07-14 06:46:59	2020-07-17 12:54:26	DE001		3.29		2.199		1.091		2.651		0.639		3.202		0.088		1.533		0.988		0.345
16	CP288	86	Prod	1100	78	2008	22	Universitätsklinikum Schleswig-Holstein	DE001	World	9336	Measurements	0	5855	MEASUREMENTS	Measurements	21		48204	Skin discolouration	0		196714	21	2020-07-14 06:46:59	2020-07-14 06:46:59	2020-07-17 12:54:26	DE001		2.91		1.993		0.918		2.429		0.482		2.435		0.477		1.385		0.671		0.468
16	CP288	86	Prod	1100	78	2008	22	Universitätsklinikum Schleswig-Holstein	DE001	World	9336	Measurements	0	5855	MEASUREMENTS	Measurements	21		48204	Skin discolouration	0		196715	22	2020-07-14 06:46:59	2020-07-14 06:46:59	2020-07-17 12:54:26	DE001		11.97		3.872		8.102		7.652		4.322		9.796		2.178		0.366		1.612		4.398
16	CP288	86	Prod	1100	78	2008	22	Universitätsklinikum Schleswig-Holstein	DE001	World	9336	Measurements	0	5855	MEASUREMENTS	Measurements	21		48204	Skin discolouration	0		196716	23	2020-07-14 06:46:59	2020-07-14 06:46:59	2020-07-17 12:54:26	DE001		3.8		2.562		1.246		3.006		0.803		3.353		0.456		1.529		0.645		0.596
16	CP288	86	Prod	1100	78	2008	22	Universitätsklinikum Schleswig-Holstein	DE001	World	9336	Measurements	0	5855	MEASUREMENTS	Measurements	21		48204	Skin discolouration	0		196717	24	2020-07-14 06:46:59	2020-07-14 06:46:59	2020-07-17 12:54:26	DE001		2.7		2.149		0.56		2.426		0.283		2.435		0.274		1.168		0.51		0.354
16	CP288	86	Prod	1100	78	2008	22	Universitätsklinikum Schleswig-Holstein	DE001	World	9336	Measurements	0	5855	MEASUREMENTS	Measurements	21		48204	Skin discolouration	0		196718	25	2020-07-14 06:46:59	2020-07-14 06:46:59	2020-07-17 12:54:26	DE001		10.52		4.857		5.673		8.818		1.712		9.581		0.949		0.243		1.573		2.04
16	CP288	86	Prod	1100	78	2008	22	Universitätsklinikum Schleswig-Holstein	DE001	World	9336	Measurements	0	5855	MEASUREMENTS	Measurements	21		48204	Skin discolouration	0		196719	26	2020-07-14 06:46:59	2020-07-14 06:46:59	2020-07-17 12:54:26	DE001		7.88		3.131		4.749		4.364		3.517		5.013		2.867		0		0		0.105
16	CP288	86	Prod	1100	78	2008	22	Universitätsklinikum Schleswig-Holstein	DE001	World	9336	Measurements	0	5855	MEASUREMENTS	Measurements	21		48204	Skin discolouration	0		196720	27	2020-07-14 06:46:59	2020-07-14 06:46:59	2020-07-17 12:54:26	DE001		5.87		3.431		2.447		3.88		1.997		4.08		1.798		2.417		1.612		0.942
16	CP288	86	Prod	1100	78	2008	22	Universitätsklinikum Schleswig-Holstein	DE001	World	9336	Measurements	0	5855	MEASUREMENTS	Measurements	21		48204	Skin discolouration	0		196721	28	2020-07-14 06:46:59	2020-07-14 06:46:59	2020-07-17 12:54:26	DE001		5.04		2.497		2.548		3.13		1.915		3.251		1.793		1.277		1.651		1.4
16	CP288	86	Prod	1100	78	2008	22	Universitätsklinikum Schleswig-Holstein	DE001	World	9336	Measurements	0	5855	MEASUREMENTS	Measurements	21		48204	Skin discolouration	0		196722	29	2020-07-14 06:46:59	2020-07-14 06:46:59	2020-07-17 12:54:26	DE001		2.18		1.922		0.262		2.022		0.161		2.095		0.088		0.729		0.475		0.246
16	CP288	86	Prod	1100	78	2008	22	Universitätsklinikum Schleswig-Holstein	DE001	World	9336	Measurements	0	5855	MEASUREMENTS	Measurements	21		48204	Skin discolouration	0		196723	30	2020-07-14 06:46:59	2020-07-14 06:46:59	2020-07-17 12:54:26	DE001		2.43		1.533		0.899		1.627		0.806		2.102		0.33		1.204		0.395		0.168
16	CP288	86	Prod	1100	78	2008	22	Universitätsklinikum Schleswig-Holstein	DE001	World	9336	Measurements	0	5855	MEASUREMENTS	Measurements	21		48204	Skin discolouration	0		196724	31	2020-07-14 06:46:59	2020-07-14 06:46:59	2020-07-17 12:54:26	DE001		12.81		3.466		9.352		6.834		5.984		7.966		4.852		1.068		2.062		7.186
16	CP288	86	Prod	1101	78	2009	22	Universitätsklinikum Schleswig-Holstein	DE001	World	9367	Measurements	0	5855	MEASUREMENTS	Measurements	21		48264	Skin discolouration	0		131708	1	2020-07-14 06:47:03	2020-07-14 06:47:03	2020-07-17 12:54:26	DE001		1.76		1.262		0.507		1.696		0.074		1.709		0.06		0.002		0.004		0.01
16	CP288	86	Prod	1101	78	2009	22	Universitätsklinikum Schleswig-Holstein	DE001	World	9367	Measurements	0	5855	MEASUREMENTS	Measurements	21		48264	Skin discolouration	0		196833	2	2020-07-14 06:47:03	2020-07-14 06:47:03	2020-07-17 12:54:26	DE001		1.29		0.899		0.395		1.044		0.249		1.222		0.071		0		0.004		0.075
16	CP288	86	Prod	1101	78	2009	22	Universitätsklinikum Schleswig-Holstein	DE001	World	9367	Measurements	0	5855	MEASUREMENTS	Measurements	21		48264	Skin discolouration	0		196834	3	2020-07-14 06:47:03	2020-07-14 06:47:03	2020-07-17 12:54:26	DE001		10.99		4.535		6.456		7.795		3.196		10.14		0.846		0		0		0.036
16	CP288	86	Prod	1101	78	2009	22	Universitätsklinikum Schleswig-Holstein	DE001	World	9367	Measurements	0	5855	MEASUREMENTS	Measurements	21		48264	Skin discolouration	0		196835	4	2020-07-14 06:47:03	2020-07-14 06:47:03	2020-07-17 12:54:26	DE001		1.47		0.951		0.522		1.011		0.462		1.217		0.256		0		0		0.023
16	CP288	86	Prod	1101	78	2009	22	Universitätsklinikum Schleswig-Holstein	DE001	World	9367	Measurements	0	5855	MEASUREMENTS	Measurements	21		48264	Skin discolouration	0		196836	5	2020-07-14 06:47:03	2020-07-14 06:47:03	2020-07-17 12:54:26	DE001		8.47		2.238		6.241		2.802		5.677		3.397		5.082		0.015		0.241		1.472
16	CP288	86	Prod	1101	78	2009	22	Universitätsklinikum Schleswig-Holstein	DE001	World	9367	Measurements	0	5855	MEASUREMENTS	Measurements	21		48264	Skin discolouration	0		196837	6	2020-07-14 06:47:03	2020-07-14 06:47:03	2020-07-17 12:54:26	DE001		0.6		0.604		0		0.604		0		0.604		0		0		0		0
16	CP288	86	Prod	1101	78	2009	22	Universitätsklinikum Schleswig-Holstein	DE001	World	9367	Measurements	0	5855	MEASUREMENTS	Measurements	21		48264	Skin discolouration	0		196838	7	2020-07-14 06:47:03	2020-07-14 06:47:03	2020-07-17 12:54:26	DE001		8.24		2.193		6.047		3.041		5.199		3.112		5.128		0		0		0
16	CP288	86	Prod	1101	78	2009	22	Universitätsklinikum Schleswig-Holstein	DE001	World	9367	Measurements	0	5855	MEASUREMENTS	Measurements	21		48264	Skin discolouration	0		196839	8	2020-07-14 06:47:03	2020-07-14 06:47:03	2020-07-17 12:54:26	DE001		7.77		2.275		5.496		3.899		3.872		5.598		2.173		0		0		0.001
16	CP288	86	Prod	1101	78	2009	22	Universitätsklinikum Schleswig-Holstein	DE001	World	9367	Measurements	0	5855	MEASUREMENTS	Measurements	21		48264	Skin discolouration	0		196840	9	2020-07-14 06:47:03	2020-07-14 06:47:03	2020-07-17 12:54:26	DE001		1.19		0.321		0.874		0.805		0.39		1.187		0.008		0		0		0.004
16	CP288	86	Prod	1101	78	2009	22	Universitätsklinikum Schleswig-Holstein	DE001	World	9367	Measurements	0	5855	MEASUREMENTS	Measurements	21		48264	Skin discolouration	0		196841	10	2020-07-14 06:47:03	2020-07-14 06:47:03	2020-07-17 12:54:26	DE001		1.48		0.97		0.518		0.97		0.518		1.305		0.183		0		0		0.013
16	CP288	86	Prod	1101	78	2009	22	Universitätsklinikum Schleswig-Holstein	DE001	World	9367	Measurements	0	5855	MEASUREMENTS	Measurements	21		48264	Skin discolouration	0		196842	11	2020-07-14 06:47:03	2020-07-14 06:47:03	2020-07-17 12:54:26	DE001		1.2		1.048		0.156		1.118		0.086		1.153		0.051		0		0.005		0.035
16	CP288	86	Prod	1101	78	2009	22	Universitätsklinikum Schleswig-Holstein	DE001	World	9367	Measurements	0	5855	MEASUREMENTS	Measurements	21		48264	Skin discolouration	0		196843	12	2020-07-14 06:47:03	2020-07-14 06:47:03	2020-07-17 12:54:26	DE001		3.22		0.948		2.275		0.959		2.264		1.5		1.723		0.002		0.008		0.027
16	CP288	86	Prod	1101	78	2009	22	Universitätsklinikum Schleswig-Holstein	DE001	World	9367	Measurements	0	5855	MEASUREMENTS	Measurements	21		48264	Skin discolouration	0		196844	13	2020-07-14 06:47:03	2020-07-14 06:47:03	2020-07-17 12:54:26	DE001		0.73		0.434		0.298		0.435		0.296		0.665		0.067		0		0		0
16	CP288	86	Prod	1101	78	2009	22	Universitätsklinikum Schleswig-Holstein	DE001	World	9367	Measurements	0	5855	MEASUREMENTS	Measurements	21		48264	Skin discolouration	0		196845	14	2020-07-14 06:47:03	2020-07-14 06:47:03	2020-07-17 12:54:26	DE001		0.28		0.286		0		0.286		0		0.286		0		0.001		0.002		0.002
16	CP288	86	Prod	1101	78	2009	22	Universitätsklinikum Schleswig-Holstein	DE001	World	9367	Measurements	0	5855	MEASUREMENTS	Measurements	21		48264	Skin discolouration	0		196846	15	2020-07-14 06:47:03	2020-07-14 06:47:03	2020-07-17 12:54:26	DE001		4.76		0.428		4.336		1.137		3.628		2.942		1.822		0		0		0.017
16	CP288	86	Prod	1101	78	2009	22	Universitätsklinikum Schleswig-Holstein	DE001	World	9367	Measurements	0	5855	MEASUREMENTS	Measurements	21		48264	Skin discolouration	0		196847	16	2020-07-14 06:47:03	2020-07-14 06:47:03	2020-07-17 12:54:26	DE001		3.35		1.444		1.913		1.697		1.66		2.829		0.528		0		0		0.015
16	CP288	86	Prod	1101	78	2009	22	Universitätsklinikum Schleswig-Holstein	DE001	World	9367	Measurements	0	5855	MEASUREMENTS	Measurements	21		48264	Skin discolouration	0		196848	17	2020-07-14 06:47:03	2020-07-14 06:47:03	2020-07-17 12:54:26	DE001		0.3		0.308		0		0.308		0		0.308		0		0		0.005		0.005
16	CP288	86	Prod	1101	78	2009	22	Universitätsklinikum Schleswig-Holstein	DE001	World	9367	Measurements	0	5855	MEASUREMENTS	Measurements	21		48264	Skin discolouration	0		196849	18	2020-07-14 06:47:03	2020-07-14 06:47:03	2020-07-17 12:54:26	DE001		1.57		0.552		1.024		0.597		0.98		1.335		0.241		0		0		0
16	CP288	86	Prod	1101	78	2009	22	Universitätsklinikum Schleswig-Holstein	DE001	World	9367	Measurements	0	5855	MEASUREMENTS	Measurements	21		48264	Skin discolouration	0		196850	19	2020-07-14 06:47:03	2020-07-14 06:47:03	2020-07-17 12:54:26	DE001		1.17		1.139		0.038		1.178		0		1.178		0		0		0		0
16	CP288	86	Prod	1101	78	2009	22	Universitätsklinikum Schleswig-Holstein	DE001	World	9367	Measurements	0	5855	MEASUREMENTS	Measurements	21		48264	Skin discolouration	0		196851	20	2020-07-14 06:47:03	2020-07-14 06:47:03	2020-07-17 12:54:26	DE001		2.03		2.011		0.025		2.02		0.016		2.029		0.008		0.098		0.043		0.205
16	CP288	86	Prod	1101	78	2009	22	Universitätsklinikum Schleswig-Holstein	DE001	World	9367	Measurements	0	5855	MEASUREMENTS	Measurements	21		48264	Skin discolouration	0		196852	21	2020-07-14 06:47:03	2020-07-14 06:47:03	2020-07-17 12:54:26	DE001		1.8		1.557		0.25		1.713		0.094		1.807		0		0		0.002		0.01
16	CP288	86	Prod	1101	78	2009	22	Universitätsklinikum Schleswig-Holstein	DE001	World	9367	Measurements	0	5855	MEASUREMENTS	Measurements	21		48264	Skin discolouration	0		196853	22	2020-07-14 06:47:03	2020-07-14 06:47:03	2020-07-17 12:54:26	DE001		2.62		2.078		0.549		2.556		0.07		2.618		0.009		0		0		0.001
16	CP288	86	Prod	1102	78	2010	22	Universitätsklinikum Schleswig-Holstein	DE001	World	9398	Measurements	0	5855	MEASUREMENTS	Measurements	21		48324	Skin discolouration	0		131788	1	2020-07-14 06:47:00	2020-07-14 06:47:00	2020-07-17 12:54:26	DE001		28.25		5.752		22.5		9.575		18.68		14.94		13.3		0.005		0.027		2.28
16	CP288	86	Prod	1102	78	2010	22	Universitätsklinikum Schleswig-Holstein	DE001	World	9398	Measurements	0	5855	MEASUREMENTS	Measurements	21		48324	Skin discolouration	0		196739	2	2020-07-14 06:47:00	2020-07-14 06:47:00	2020-07-17 12:54:26	DE001		25.41		4.823		20.59		9.806		15.6		15.35		10.05		4.434		3.745		2.683
16	CP288	86	Prod	1102	78	2010	22	Universitätsklinikum Schleswig-Holstein	DE001	World	9398	Measurements	0	5855	MEASUREMENTS	Measurements	21		48324	Skin discolouration	0		196740	3	2020-07-14 06:47:00	2020-07-14 06:47:00	2020-07-17 12:54:26	DE001		9.37		3.133		6.238		6.104		3.268		7.622		1.75		0.027		0.227		0.349
16	CP288	86	Prod	1102	78	2010	22	Universitätsklinikum Schleswig-Holstein	DE001	World	9398	Measurements	0	5855	MEASUREMENTS	Measurements	21		48324	Skin discolouration	0		196741	4	2020-07-14 06:47:00	2020-07-14 06:47:00	2020-07-17 12:54:26	DE001		9.6		2.848		6.759		4.137		5.47		5.528		4.078		0.618		1.12		0.621
16	CP288	86	Prod	1102	78	2010	22	Universitätsklinikum Schleswig-Holstein	DE001	World	9398	Measurements	0	5855	MEASUREMENTS	Measurements	21		48324	Skin discolouration	0		196742	5	2020-07-14 06:47:00	2020-07-14 06:47:00	2020-07-17 12:54:26	DE001		10.05		2.08		7.972		5.014		5.038		7.813		2.239		0.038		0.034		0.111
16	CP288	86	Prod	1102	78	2010	22	Universitätsklinikum Schleswig-Holstein	DE001	World	9398	Measurements	0	5855	MEASUREMENTS	Measurements	21		48324	Skin discolouration	0		196743	6	2020-07-14 06:47:00	2020-07-14 06:47:00	2020-07-17 12:54:26	DE001		23.53		1.708		21.82		2.596		20.93		5.028		18.5		0.152		0.67		3.686
16	CP288	86	Prod	1102	78	2010	22	Universitätsklinikum Schleswig-Holstein	DE001	World	9398	Measurements	0	5855	MEASUREMENTS	Measurements	21		48324	Skin discolouration	0		196744	7	2020-07-14 06:47:00	2020-07-14 06:47:00	2020-07-17 12:54:26	DE001		29.91		5.004		24.91		8.873		21.04		12.84		17.07		0.319		1.55		5.287
16	CP288	86	Prod	1102	78	2010	22	Universitätsklinikum Schleswig-Holstein	DE001	World	9398	Measurements	0	5855	MEASUREMENTS	Measurements	21		48324	Skin discolouration	0		196745	8	2020-07-14 06:47:00	2020-07-14 06:47:00	2020-07-17 12:54:26	DE001		13.56		3.592		9.975		7.45		6.117		11.16		2.397		0.051		0.146		0.164
16	CP288	86	Prod	1102	78	2010	22	Universitätsklinikum Schleswig-Holstein	DE001	World	9398	Measurements	0	5855	MEASUREMENTS	Measurements	21		48324	Skin discolouration	0		196746	9	2020-07-14 06:47:00	2020-07-14 06:47:00	2020-07-17 12:54:26	DE001		7.18		1.817		5.367		2.421		4.764		3.599		3.586		0.052		0.055		0.188
16	CP288	86	Prod	1102	78	2010	22	Universitätsklinikum Schleswig-Holstein	DE001	World	9398	Measurements	0	5855	MEASUREMENTS	Measurements	21		48324	Skin discolouration	0		196747	10	2020-07-14 06:47:00	2020-07-14 06:47:00	2020-07-17 12:54:26	DE001		16.02		2.188		13.83		5.577		10.44		9.02		7.006		0.04		0.109		0.483
16	CP288	86	Prod	1102	78	2010	22	Universitätsklinikum Schleswig-Holstein	DE001	World	9398	Measurements	0	5855	MEASUREMENTS	Measurements	21		48324	Skin discolouration	0		196748	11	2020-07-14 06:47:00	2020-07-14 06:47:00	2020-07-17 12:54:26	DE001		11.18		3.503		7.68		5.908		5.275		7.985		3.198		0.002		0.004		0.012
16	CP288	86	Prod	1102	78	2010	22	Universitätsklinikum Schleswig-Holstein	DE001	World	9398	Measurements	0	5855	MEASUREMENTS	Measurements	21		48324	Skin discolouration	0		196749	12	2020-07-14 06:47:00	2020-07-14 06:47:00	2020-07-17 12:54:26	DE001		5.63		2.232		3.405		2.875		2.762		3.826		1.811		0.102		0.256		0.462
16	CP288	86	Prod	1102	78	2010	22	Universitätsklinikum Schleswig-Holstein	DE001	World	9398	Measurements	0	5855	MEASUREMENTS	Measurements	21		48324	Skin discolouration	0		196750	13	2020-07-14 06:47:00	2020-07-14 06:47:00	2020-07-17 12:54:26	DE001		19.81		5.248		14.57		10.47		9.342		14.68		5.13		0.181		0.437		1.161
16	CP288	86	Prod	1102	78	2010	22	Universitätsklinikum Schleswig-Holstein	DE001	World	9398	Measurements	0	5855	MEASUREMENTS	Measurements	21		48324	Skin discolouration	0		196751	14	2020-07-14 06:47:00	2020-07-14 06:47:00	2020-07-17 12:54:26	DE001		16.19		1.146		15.04		2.952		13.23		7.097		9.094		0.006		0.009		0.018
16	CP288	86	Prod	1102	78	2010	22	Universitätsklinikum Schleswig-Holstein	DE001	World	9398	Measurements	0	5855	MEASUREMENTS	Measurements	21		48324	Skin discolouration	0		196752	15	2020-07-14 06:47:00	2020-07-14 06:47:00	2020-07-17 12:54:26	DE001		12.17		4.326		7.846		8.545		3.626		10.99		1.178		0.163		0.091		0.093
16	CP288	86	Prod	1102	78	2010	22	Universitätsklinikum Schleswig-Holstein	DE001	World	9398	Measurements	0	5855	MEASUREMENTS	Measurements	21		48324	Skin discolouration	0		196753	16	2020-07-14 06:47:00	2020-07-14 06:47:00	2020-07-17 12:54:26	DE001		31.94		6.328		25.62		10.79		21.15		15.2		16.73		4.306		4.292		12.68
16	CP288	86	Prod	1102	78	2010	22	Universitätsklinikum Schleswig-Holstein	DE001	World	9398	Measurements	0	5855	MEASUREMENTS	Measurements	21		48324	Skin discolouration	0		196754	17	2020-07-14 06:47:00	2020-07-14 06:47:00	2020-07-17 12:54:26	DE001		4.76		1.208		3.56		1.507		3.261		2.427		2.341		0.021		0.035		0.09
16	CP288	86	Prod	1102	78	2010	22	Universitätsklinikum Schleswig-Holstein	DE001	World	9398	Measurements	0	5855	MEASUREMENTS	Measurements	21		48324	Skin discolouration	0		196755	18	2020-07-14 06:47:00	2020-07-14 06:47:00	2020-07-17 12:54:26	DE001		24.67		5.704		18.97		8.641		16.03		11.35		13.32		3.841		4.174		2.272
16	CP288	86	Prod	1102	78	2010	22	Universitätsklinikum Schleswig-Holstein	DE001	World	9398	Measurements	0	5855	MEASUREMENTS	Measurements	21		48324	Skin discolouration	0		196756	19	2020-07-14 06:47:00	2020-07-14 06:47:00	2020-07-17 12:54:26	DE001		22.61		6.039		16.57		11.32		11.28		16.76		5.85		0.135		0.212		0.607
16	CP288	86	Prod	1102	78	2010	22	Universitätsklinikum Schleswig-Holstein	DE001	World	9398	Measurements	0	5855	MEASUREMENTS	Measurements	21		48324	Skin discolouration	0		196757	20	2020-07-14 06:47:00	2020-07-14 06:47:00	2020-07-17 12:54:26	DE001		8.54		3.231		5.316		5.454		3.093		7.084		1.463		0.09		0.21		0.243
16	CP288	86	Prod	1102	78	2010	22	Universitätsklinikum Schleswig-Holstein	DE001	World	9398	Measurements	0	5855	MEASUREMENTS	Measurements	21		48324	Skin discolouration	0		196758	21	2020-07-14 06:47:00	2020-07-14 06:47:00	2020-07-17 12:54:26	DE001		24.68		4.09		20.59		7.05		17.63		11.13		13.54		1.033		0.966		2.362
16	CP288	86	Prod	1102	78	2010	22	Universitätsklinikum Schleswig-Holstein	DE001	World	9398	Measurements	0	5855	MEASUREMENTS	Measurements	21		48324	Skin discolouration	0		196759	22	2020-07-14 06:47:00	2020-07-14 06:47:00	2020-07-17 12:54:26	DE001		11.79		3.299		8.499		6.401		5.398		7.883		3.916		0.097		0.337		0.393
16	CP288	86	Prod	1102	78	2010	22	Universitätsklinikum Schleswig-Holstein	DE001	World	9398	Measurements	0	5855	MEASUREMENTS	Measurements	21		48324	Skin discolouration	0		196760	23	2020-07-14 06:47:00	2020-07-14 06:47:00	2020-07-17 12:54:26	DE001		34.18		3.562		30.62		6.798		27.39		12.56		21.62		2.302		3.869		3.806
16	CP288	86	Prod	1102	78	2010	22	Universitätsklinikum Schleswig-Holstein	DE001	World	9398	Measurements	0	5855	MEASUREMENTS	Measurements	21		48324	Skin discolouration	0		196761	24	2020-07-14 06:47:00	2020-07-14 06:47:00	2020-07-17 12:54:26	DE001		9		2.104		6.898		4.366		4.637		5.879		3.124		0.042		0.144		0.34
16	CP288	86	Prod	1102	78	2010	22	Universitätsklinikum Schleswig-Holstein	DE001	World	9398	Measurements	0	5855	MEASUREMENTS	Measurements	21		48324	Skin discolouration	0		196762	25	2020-07-14 06:47:00	2020-07-14 06:47:00	2020-07-17 12:54:26	DE001		6.35		2.691		3.665		4.39		1.966		5.625		0.731		0.029		0.033		0.044
16	CP288	86	Prod	1102	78	2010	22	Universitätsklinikum Schleswig-Holstein	DE001	World	9398	Measurements	0	5855	MEASUREMENTS	Measurements	21		48324	Skin discolouration	0		196763	26	2020-07-14 06:47:00	2020-07-14 06:47:00	2020-07-17 12:54:26	DE001		10.25		1.63		8.627		2.469		7.788		2.901		7.356		0.047		0.171		0.514
16	CP288	86	Prod	1102	78	2010	22	Universitätsklinikum Schleswig-Holstein	DE001	World	9398	Measurements	0	5855	MEASUREMENTS	Measurements	21		48324	Skin discolouration	0		196764	27	2020-07-14 06:47:00	2020-07-14 06:47:00	2020-07-17 12:54:26	DE001		14.56		4.069		10.49		8.11		6.454		11.15		3.405		0.084		0.067		0.112
16	CP288	86	Prod	1102	78	2010	22	Universitätsklinikum Schleswig-Holstein	DE001	World	9398	Measurements	0	5855	MEASUREMENTS	Measurements	21		48324	Skin discolouration	0		196765	28	2020-07-14 06:47:00	2020-07-14 06:47:00	2020-07-17 12:54:26	DE001		32.15		4.865		27.28		8.718		23.43		13.72		18.42		4.045		5.339		3.979
16	CP288	86	Prod	1102	78	2010	22	Universitätsklinikum Schleswig-Holstein	DE001	World	9398	Measurements	0	5855	MEASUREMENTS	Measurements	21		48324	Skin discolouration	0		196766	29	2020-07-14 06:47:00	2020-07-14 06:47:00	2020-07-17 12:54:26	DE001		45.69		5.987		39.7		10.52		35.17		16.69		29		6.155		3.785		4.306
16	CP288	86	Prod	1102	78	2010	22	Universitätsklinikum Schleswig-Holstein	DE001	World	9398	Measurements	0	5855	MEASUREMENTS	Measurements	21		48324	Skin discolouration	0		196767	30	2020-07-14 06:47:00	2020-07-14 06:47:00	2020-07-17 12:54:26	DE001		0		0		0		0		0		0		0		0		0		0
16	CP288	86	Prod	1102	78	2010	22	Universitätsklinikum Schleswig-Holstein	DE001	World	9398	Measurements	0	5855	MEASUREMENTS	Measurements	21		48324	Skin discolouration	0		196768	31	2020-07-14 06:47:00	2020-07-14 06:47:00	2020-07-17 12:54:26	DE001		23.02		6.607		16.41		10.97		12.05		14.08		8.94		0.936		1.619		4.176
16	CP288	86	Prod	1102	78	2010	22	Universitätsklinikum Schleswig-Holstein	DE001	World	9398	Measurements	0	5855	MEASUREMENTS	Measurements	21		48324	Skin discolouration	0		196769	32	2020-07-14 06:47:00	2020-07-14 06:47:00	2020-07-17 12:54:26	DE001		2.47		1.075		1.399		1.942		0.532		2.353		0.121		0.035		0.042		0.042
16	CP288	86	Prod	1102	78	2010	22	Universitätsklinikum Schleswig-Holstein	DE001	World	9398	Measurements	0	5855	MEASUREMENTS	Measurements	21		48324	Skin discolouration	0		196770	33	2020-07-14 06:47:00	2020-07-14 06:47:00	2020-07-17 12:54:26	DE001		24.54		7.384		17.16		13.8		10.74		18.92		5.622		0		0		0.035
16	CP288	86	Prod	1102	78	2010	22	Universitätsklinikum Schleswig-Holstein	DE001	World	9398	Measurements	0	5855	MEASUREMENTS	Measurements	21		48324	Skin discolouration	0		196771	34	2020-07-14 06:47:00	2020-07-14 06:47:00	2020-07-17 12:54:26	DE001		5.41		2.558		2.856		4.499		0.915		5.196		0.218		0		0		0.009
16	CP288	86	Prod	1102	78	2010	22	Universitätsklinikum Schleswig-Holstein	DE001	World	9398	Measurements	0	5855	MEASUREMENTS	Measurements	21		48324	Skin discolouration	0		196772	35	2020-07-14 06:47:00	2020-07-14 06:47:00	2020-07-17 12:54:26	DE001		17.14		5.595		11.55		9.206		7.942		13.04		4.106		0.085		0.076		0.57
16	CP288	86	Prod	1102	78	2010	22	Universitätsklinikum Schleswig-Holstein	DE001	World	9398	Measurements	0	5855	MEASUREMENTS	Measurements	21		48324	Skin discolouration	0		196773	36	2020-07-14 06:47:00	2020-07-14 06:47:00	2020-07-17 12:54:26	DE001		9.61		2.983		6.629		5.286		4.326		6.534		3.078		0.026		0.042		0.141
16	CP288	86	Prod	1102	78	2010	22	Universitätsklinikum Schleswig-Holstein	DE001	World	9398	Measurements	0	5855	MEASUREMENTS	Measurements	21		48324	Skin discolouration	0		196774	37	2020-07-14 06:47:00	2020-07-14 06:47:00	2020-07-17 12:54:26	DE001		25.93		4.128		21.8		8.304		17.62		12.68		13.24		0.657		1.234		2.73
16	CP288	86	Prod	1103	81	2041	23	Klinikum der Universitat Munchen- Grosshadern	DE002	World	9429	Measurements	0	5855	MEASUREMENTS	Measurements	21		48384	Skin discolouration	0		131868	1	2020-07-10 06:08:13	2020-07-10 06:08:13	2020-07-17 12:54:26	DE002		9.78		4.273		5.511		6.372		3.412		8.123		1.661		0.01		0.218		0.707
16	CP288	86	Prod	1103	81	2041	23	Klinikum der Universitat Munchen- Grosshadern	DE002	World	9429	Measurements	0	5855	MEASUREMENTS	Measurements	21		48384	Skin discolouration	0		195197	2	2020-07-10 06:08:13	2020-07-10 06:08:13	2020-07-17 12:54:26	DE002		0.75		0.669		0.088		0.707		0.05		0.707		0.05		0.001		0.018		0.119
16	CP288	86	Prod	1103	81	2041	23	Klinikum der Universitat Munchen- Grosshadern	DE002	World	9429	Measurements	0	5855	MEASUREMENTS	Measurements	21		48384	Skin discolouration	0		195198	3	2020-07-10 06:08:13	2020-07-10 06:08:13	2020-07-17 12:54:26	DE002		2.42		0.787		1.638		0.811		1.613		0.843		1.582		0		0.003		0.07
16	CP288	86	Prod	1103	81	2041	23	Klinikum der Universitat Munchen- Grosshadern	DE002	World	9429	Measurements	0	5855	MEASUREMENTS	Measurements	21		48384	Skin discolouration	0		195199	4	2020-07-10 06:08:13	2020-07-10 06:08:13	2020-07-17 12:54:26	DE002		20.19		3.735		16.46		5.323		14.87		5.851		14.34		0		0		0.002
16	CP288	86	Prod	1103	81	2041	23	Klinikum der Universitat Munchen- Grosshadern	DE002	World	9429	Measurements	0	5855	MEASUREMENTS	Measurements	21		48384	Skin discolouration	0		195200	5	2020-07-10 06:08:13	2020-07-10 06:08:13	2020-07-17 12:54:26	DE002		23.72		4.71		19.01		7.88		15.84		9.986		13.73		0		0.01		0.133
16	CP288	86	Prod	1103	81	2041	23	Klinikum der Universitat Munchen- Grosshadern	DE002	World	9429	Measurements	0	5855	MEASUREMENTS	Measurements	21		48384	Skin discolouration	0		195201	6	2020-07-10 06:08:13	2020-07-10 06:08:13	2020-07-17 12:54:26	DE002		5.82		2.109		3.713		2.775		3.048		2.896		2.927		0.002		0.009		0.167
16	CP288	86	Prod	1103	81	2041	23	Klinikum der Universitat Munchen- Grosshadern	DE002	World	9429	Measurements	0	5855	MEASUREMENTS	Measurements	21		48384	Skin discolouration	0		195202	7	2020-07-10 06:08:13	2020-07-10 06:08:13	2020-07-17 12:54:26	DE002		19.25		3.869		15.38		6.741		12.51		8.408		10.84		0		0		0
16	CP288	86	Prod	1103	81	2041	23	Klinikum der Universitat Munchen- Grosshadern	DE002	World	9429	Measurements	0	5855	MEASUREMENTS	Measurements	21		48384	Skin discolouration	0		195203	8	2020-07-10 06:08:13	2020-07-10 06:08:13	2020-07-17 12:54:26	DE002		2.95		2.467		0.488		2.933		0.021		2.947		0.007		0		0		0.007
16	CP288	86	Prod	1103	81	2041	23	Klinikum der Universitat Munchen- Grosshadern	DE002	World	9429	Measurements	0	5855	MEASUREMENTS	Measurements	21		48384	Skin discolouration	0		195204	9	2020-07-10 06:08:13	2020-07-10 06:08:13	2020-07-17 12:54:26	DE002		4.61		2.115		2.502		3.065		1.552		3.783		0.834		0		0		0
16	CP288	86	Prod	1103	81	2041	23	Klinikum der Universitat Munchen- Grosshadern	DE002	World	9429	Measurements	0	5855	MEASUREMENTS	Measurements	21		48384	Skin discolouration	0		195205	10	2020-07-10 06:08:13	2020-07-10 06:08:13	2020-07-17 12:54:26	DE002		2.5		2.097		0.406		2.465		0.038		2.503		0		0		0.012		0.076
16	CP288	86	Prod	1103	81	2041	23	Klinikum der Universitat Munchen- Grosshadern	DE002	World	9429	Measurements	0	5855	MEASUREMENTS	Measurements	21		48384	Skin discolouration	0		195206	11	2020-07-10 06:08:13	2020-07-10 06:08:13	2020-07-17 12:54:26	DE002		2.67		0.758		1.919		1.067		1.611		1.539		1.138		0		0.009		0.399
16	CP288	86	Prod	1103	81	2041	23	Klinikum der Universitat Munchen- Grosshadern	DE002	World	9429	Measurements	0	5855	MEASUREMENTS	Measurements	21		48384	Skin discolouration	0		195207	12	2020-07-10 06:08:13	2020-07-10 06:08:13	2020-07-17 12:54:26	DE002		10.5		2.917		7.591		5.268		5.24		6.854		3.654		0		0		0
16	CP288	86	Prod	1103	81	2041	23	Klinikum der Universitat Munchen- Grosshadern	DE002	World	9429	Measurements	0	5855	MEASUREMENTS	Measurements	21		48384	Skin discolouration	0		195208	13	2020-07-10 06:08:13	2020-07-10 06:08:13	2020-07-17 12:54:26	DE002		1.16		1.059		0.109		1.128		0.041		1.133		0.035		0		0.001		0.169
16	CP288	86	Prod	1103	81	2041	23	Klinikum der Universitat Munchen- Grosshadern	DE002	World	9429	Measurements	0	5855	MEASUREMENTS	Measurements	21		48384	Skin discolouration	0		195209	14	2020-07-10 06:08:13	2020-07-10 06:08:13	2020-07-17 12:54:26	DE002		0.81		0.715		0.103		0.818		0		0.818		0		0		0		0.019
16	CP288	86	Prod	1103	81	2041	23	Klinikum der Universitat Munchen- Grosshadern	DE002	World	9429	Measurements	0	5855	MEASUREMENTS	Measurements	21		48384	Skin discolouration	0		195210	15	2020-07-10 06:08:13	2020-07-10 06:08:13	2020-07-17 12:54:26	DE002		2.62		2.102		0.524		2.452		0.175		2.492		0.134		0.001		0.045		0.161
16	CP288	86	Prod	1103	81	2041	23	Klinikum der Universitat Munchen- Grosshadern	DE002	World	9429	Measurements	0	5855	MEASUREMENTS	Measurements	21		48384	Skin discolouration	0		195211	16	2020-07-10 06:08:13	2020-07-10 06:08:13	2020-07-17 12:54:26	DE002		5.01		3.118		1.899		4.13		0.887		4.5		0.518		0		0.045		0.269
16	CP288	86	Prod	1103	81	2041	23	Klinikum der Universitat Munchen- Grosshadern	DE002	World	9429	Measurements	0	5855	MEASUREMENTS	Measurements	21		48384	Skin discolouration	0		195212	17	2020-07-10 06:08:13	2020-07-10 06:08:13	2020-07-17 12:54:26	DE002		0.92		0.886		0.035		0.921		0		0.921		0		0.002		0.017		0.066
16	CP288	86	Prod	1103	81	2041	23	Klinikum der Universitat Munchen- Grosshadern	DE002	World	9429	Measurements	0	5855	MEASUREMENTS	Measurements	21		48384	Skin discolouration	0		195213	18	2020-07-10 06:08:13	2020-07-10 06:08:13	2020-07-17 12:54:26	DE002		4.86		2.651		2.212		3.796		1.067		4.296		0.567		0		0		0
16	CP288	86	Prod	1103	81	2041	23	Klinikum der Universitat Munchen- Grosshadern	DE002	World	9429	Measurements	0	5855	MEASUREMENTS	Measurements	21		48384	Skin discolouration	0		195214	19	2020-07-10 06:08:13	2020-07-10 06:08:13	2020-07-17 12:54:26	DE002		1.81		1.464		0.349		1.584		0.23		1.652		0.161		0		0		0
16	CP288	86	Prod	1103	81	2041	23	Klinikum der Universitat Munchen- Grosshadern	DE002	World	9429	Measurements	0	5855	MEASUREMENTS	Measurements	21		48384	Skin discolouration	0		195215	20	2020-07-10 06:08:13	2020-07-10 06:08:13	2020-07-17 12:54:26	DE002		24.06		4.079		19.98		6.738		17.32		9.624		14.43		0		0		0.002
16	CP288	86	Prod	1103	81	2041	23	Klinikum der Universitat Munchen- Grosshadern	DE002	World	9429	Measurements	0	5855	MEASUREMENTS	Measurements	21		48384	Skin discolouration	0		195216	21	2020-07-10 06:08:13	2020-07-10 06:08:13	2020-07-17 12:54:26	DE002		29.05		3.883		25.17		7.285		21.77		10.39		18.66		0		0.001		0.018
16	CP288	86	Prod	1103	81	2041	23	Klinikum der Universitat Munchen- Grosshadern	DE002	World	9429	Measurements	0	5855	MEASUREMENTS	Measurements	21		48384	Skin discolouration	0		195217	22	2020-07-10 06:08:13	2020-07-10 06:08:13	2020-07-17 12:54:26	DE002		5.5		3.43		2.079		4.896		0.612		5.248		0.261		0		0		0.064
16	CP288	86	Prod	1103	81	2041	23	Klinikum der Universitat Munchen- Grosshadern	DE002	World	9429	Measurements	0	5855	MEASUREMENTS	Measurements	21		48384	Skin discolouration	0		195218	23	2020-07-10 06:08:13	2020-07-10 06:08:13	2020-07-17 12:54:26	DE002		40.61		3.258		37.36		6.393		34.22		10.28		30.33		0		0		0
16	CP288	86	Prod	1103	81	2041	23	Klinikum der Universitat Munchen- Grosshadern	DE002	World	9429	Measurements	0	5855	MEASUREMENTS	Measurements	21		48384	Skin discolouration	0		195219	24	2020-07-10 06:08:13	2020-07-10 06:08:13	2020-07-17 12:54:26	DE002		18.59		3.028		15.56		5.536		13.05		6.908		11.68		0		0		0.017
16	CP288	86	Prod	1103	81	2041	23	Klinikum der Universitat Munchen- Grosshadern	DE002	World	9429	Measurements	0	5855	MEASUREMENTS	Measurements	21		48384	Skin discolouration	0		195220	25	2020-07-10 06:08:13	2020-07-10 06:08:13	2020-07-17 12:54:26	DE002		3.2		2.123		1.085		3.102		0.105		3.174		0.034		0.019		0.014		0.003
16	CP288	86	Prod	1103	81	2041	23	Klinikum der Universitat Munchen- Grosshadern	DE002	World	9429	Measurements	0	5855	MEASUREMENTS	Measurements	21		48384	Skin discolouration	0		195221	26	2020-07-10 06:08:13	2020-07-10 06:08:13	2020-07-17 12:54:26	DE002		5.45		1.024		4.432		1.34		4.117		1.347		4.11		0.007		0.046		0.071
16	CP288	86	Prod	1103	81	2041	23	Klinikum der Universitat Munchen- Grosshadern	DE002	World	9429	Measurements	0	5855	MEASUREMENTS	Measurements	21		48384	Skin discolouration	0		195222	27	2020-07-10 06:08:13	2020-07-10 06:08:13	2020-07-17 12:54:26	DE002		1.18		1.09		0.098		1.171		0.017		1.171		0.017		0		0		0
16	CP288	86	Prod	1103	81	2041	23	Klinikum der Universitat Munchen- Grosshadern	DE002	World	9429	Measurements	0	5855	MEASUREMENTS	Measurements	21		48384	Skin discolouration	0		195223	28	2020-07-10 06:08:13	2020-07-10 06:08:13	2020-07-17 12:54:26	DE002		9.95		2.061		7.891		4.196		5.757		6.804		3.149		0		0		0.297
16	CP288	86	Prod	1103	81	2041	23	Klinikum der Universitat Munchen- Grosshadern	DE002	World	9429	Measurements	0	5855	MEASUREMENTS	Measurements	21		48384	Skin discolouration	0		195224	29	2020-07-10 06:08:13	2020-07-10 06:08:13	2020-07-17 12:54:26	DE002		7.45		4.15		3.31		5.945		1.515		6.653		0.806		0		0		0.018
16	CP288	86	Prod	1103	81	2041	23	Klinikum der Universitat Munchen- Grosshadern	DE002	World	9429	Measurements	0	5855	MEASUREMENTS	Measurements	21		48384	Skin discolouration	0		195225	30	2020-07-10 06:08:13	2020-07-10 06:08:13	2020-07-17 12:54:26	DE002		7.02		3.622		3.402		5.409		1.614		6.19		0.834		0		0		0
16	CP288	86	Prod	1103	81	2041	23	Klinikum der Universitat Munchen- Grosshadern	DE002	World	9429	Measurements	0	5855	MEASUREMENTS	Measurements	21		48384	Skin discolouration	0		195226	31	2020-07-10 06:08:13	2020-07-10 06:08:13	2020-07-17 12:54:26	DE002		6.9		2.514		4.391		4.215		2.69		5.479		1.426		0.005		0.008		0.007
16	CP288	86	Prod	1103	81	2041	23	Klinikum der Universitat Munchen- Grosshadern	DE002	World	9429	Measurements	0	5855	MEASUREMENTS	Measurements	21		48384	Skin discolouration	0		195227	32	2020-07-10 06:08:13	2020-07-10 06:08:13	2020-07-17 12:54:26	DE002		3.46		1.048		2.42		1.413		2.055		1.66		1.808		0		0		0
16	CP288	86	Prod	1103	81	2041	23	Klinikum der Universitat Munchen- Grosshadern	DE002	World	9429	Measurements	0	5855	MEASUREMENTS	Measurements	21		48384	Skin discolouration	0		195228	33	2020-07-10 06:08:13	2020-07-10 06:08:13	2020-07-17 12:54:26	DE002		16.78		2.459		14.32		4.557		12.22		5.761		11.02		0		0		0.099
16	CP288	86	Prod	1103	81	2041	23	Klinikum der Universitat Munchen- Grosshadern	DE002	World	9429	Measurements	0	5855	MEASUREMENTS	Measurements	21		48384	Skin discolouration	0		195229	34	2020-07-10 06:08:13	2020-07-10 06:08:13	2020-07-17 12:54:26	DE002		7.36		2.681		4.681		4.291		3.07		4.529		2.832		0		0		0
16	CP288	86	Prod	1103	81	2041	23	Klinikum der Universitat Munchen- Grosshadern	DE002	World	9429	Measurements	0	5855	MEASUREMENTS	Measurements	21		48384	Skin discolouration	0		195230	35	2020-07-10 06:08:13	2020-07-10 06:08:13	2020-07-17 12:54:26	DE002		10.95		3.006		7.944		4.84		6.11		5.266		5.685		0		0		0
16	CP288	86	Prod	1103	81	2041	23	Klinikum der Universitat Munchen- Grosshadern	DE002	World	9429	Measurements	0	5855	MEASUREMENTS	Measurements	21		48384	Skin discolouration	0		195231	36	2020-07-10 06:08:13	2020-07-10 06:08:13	2020-07-17 12:54:26	DE002		18.78		4.533		14.25		7.712		11.07		9.366		9.421		0		0		0
16	CP288	86	Prod	1103	81	2041	23	Klinikum der Universitat Munchen- Grosshadern	DE002	World	9429	Measurements	0	5855	MEASUREMENTS	Measurements	21		48384	Skin discolouration	0		195232	37	2020-07-10 06:08:13	2020-07-10 06:08:13	2020-07-17 12:54:26	DE002		2.99		1.563		1.436		1.864		1.134		2.373		0.625		0.025		0.069		0.117
16	CP288	86	Prod	1103	81	2041	23	Klinikum der Universitat Munchen- Grosshadern	DE002	World	9429	Measurements	0	5855	MEASUREMENTS	Measurements	21		48384	Skin discolouration	0		195233	38	2020-07-10 06:08:13	2020-07-10 06:08:13	2020-07-17 12:54:26	DE002		28.54		3.853		24.69		7.765		20.78		11.93		16.61		0		0.008		0.006
16	CP288	86	Prod	1103	81	2041	23	Klinikum der Universitat Munchen- Grosshadern	DE002	World	9429	Measurements	0	5855	MEASUREMENTS	Measurements	21		48384	Skin discolouration	0		195234	39	2020-07-10 06:08:13	2020-07-10 06:08:13	2020-07-17 12:54:26	DE002		27.36		4.356		23		7.864		19.5		10.76		16.6		0		0.002		0.145
16	CP288	86	Prod	1103	81	2041	23	Klinikum der Universitat Munchen- Grosshadern	DE002	World	9429	Measurements	0	5855	MEASUREMENTS	Measurements	21		48384	Skin discolouration	0		195235	40	2020-07-10 06:08:13	2020-07-10 06:08:13	2020-07-17 12:54:26	DE002		18.1		3.653		14.45		7.213		10.89		10.7		7.405		0		0		0
16	CP288	86	Prod	1104	81	2042	23	Klinikum der Universitat Munchen- Grosshadern	DE002	World	9460	Measurements	0	5855	MEASUREMENTS	Measurements	21		48444	Skin discolouration	0		131948	1	2020-07-10 06:08:09	2020-07-10 06:08:09	2020-07-17 12:54:26	DE002		22.57		8.357		14.21		12.57		9.996		15.16		7.408		0.006		0.007		0.482
16	CP288	86	Prod	1104	81	2042	23	Klinikum der Universitat Munchen- Grosshadern	DE002	World	9460	Measurements	0	5855	MEASUREMENTS	Measurements	21		48444	Skin discolouration	0		195100	2	2020-07-10 06:08:09	2020-07-10 06:08:09	2020-07-17 12:54:26	DE002		37.8		10.04		27.76		17.24		20.56		24.54		13.26		0.027		0.208		1.537
16	CP288	86	Prod	1104	81	2042	23	Klinikum der Universitat Munchen- Grosshadern	DE002	World	9460	Measurements	0	5855	MEASUREMENTS	Measurements	21		48444	Skin discolouration	0		195101	3	2020-07-10 06:08:09	2020-07-10 06:08:09	2020-07-17 12:54:26	DE002		36.71		10.94		25.77		18.46		18.25		23.75		12.96		0.284		0.76		5.515
16	CP288	86	Prod	1104	81	2042	23	Klinikum der Universitat Munchen- Grosshadern	DE002	World	9460	Measurements	0	5855	MEASUREMENTS	Measurements	21		48444	Skin discolouration	0		195102	4	2020-07-10 06:08:09	2020-07-10 06:08:09	2020-07-17 12:54:26	DE002		17.59		9.5		8.099		13.93		3.667		16.14		1.46		0.048		0.355		1.099
16	CP288	86	Prod	1104	81	2042	23	Klinikum der Universitat Munchen- Grosshadern	DE002	World	9460	Measurements	0	5855	MEASUREMENTS	Measurements	21		48444	Skin discolouration	0		195103	5	2020-07-10 06:08:09	2020-07-10 06:08:09	2020-07-17 12:54:26	DE002		49.22		12.62		36.6		19.53		29.68		24.79		24.43		0.008		0.257		0.657
16	CP288	86	Prod	1104	81	2042	23	Klinikum der Universitat Munchen- Grosshadern	DE002	World	9460	Measurements	0	5855	MEASUREMENTS	Measurements	21		48444	Skin discolouration	0		195104	6	2020-07-10 06:08:09	2020-07-10 06:08:09	2020-07-17 12:54:26	DE002		16.38		9.721		6.66		13.45		2.928		14.92		1.46		0		0		0.013
16	CP288	86	Prod	1104	81	2042	23	Klinikum der Universitat Munchen- Grosshadern	DE002	World	9460	Measurements	0	5855	MEASUREMENTS	Measurements	21		48444	Skin discolouration	0		195105	7	2020-07-10 06:08:09	2020-07-10 06:08:09	2020-07-17 12:54:26	DE002		13.73		7.432		6.306		11		2.737		12.33		1.402		0		0		0
16	CP288	86	Prod	1104	81	2042	23	Klinikum der Universitat Munchen- Grosshadern	DE002	World	9460	Measurements	0	5855	MEASUREMENTS	Measurements	21		48444	Skin discolouration	0		195106	8	2020-07-10 06:08:09	2020-07-10 06:08:09	2020-07-17 12:54:26	DE002		32.47		9.525		22.95		18.16		14.31		25.05		7.419		0		0		0.013
16	CP288	86	Prod	1104	81	2042	23	Klinikum der Universitat Munchen- Grosshadern	DE002	World	9460	Measurements	0	5855	MEASUREMENTS	Measurements	21		48444	Skin discolouration	0		195107	9	2020-07-10 06:08:09	2020-07-10 06:08:09	2020-07-17 12:54:26	DE002		4.71		3.352		1.361		3.516		1.197		3.533		1.179		0		0		0
16	CP288	86	Prod	1104	81	2042	23	Klinikum der Universitat Munchen- Grosshadern	DE002	World	9460	Measurements	0	5855	MEASUREMENTS	Measurements	21		48444	Skin discolouration	0		195108	10	2020-07-10 06:08:09	2020-07-10 06:08:09	2020-07-17 12:54:26	DE002		18.26		8.553		9.715		12.6		5.663		15.29		2.975		0		0.189		1.014
16	CP288	86	Prod	1104	81	2042	23	Klinikum der Universitat Munchen- Grosshadern	DE002	World	9460	Measurements	0	5855	MEASUREMENTS	Measurements	21		48444	Skin discolouration	0		195109	11	2020-07-10 06:08:09	2020-07-10 06:08:09	2020-07-17 12:54:26	DE002		12.48		6.453		6.031		8.169		4.315		9.512		2.971		0.015		0.024		0.294
16	CP288	86	Prod	1104	81	2042	23	Klinikum der Universitat Munchen- Grosshadern	DE002	World	9460	Measurements	0	5855	MEASUREMENTS	Measurements	21		48444	Skin discolouration	0		195110	12	2020-07-10 06:08:09	2020-07-10 06:08:09	2020-07-17 12:54:26	DE002		9.85		7.41		2.446		9.322		0.534		9.757		0.099		0.005		0.112		0.761
16	CP288	86	Prod	1104	81	2042	23	Klinikum der Universitat Munchen- Grosshadern	DE002	World	9460	Measurements	0	5855	MEASUREMENTS	Measurements	21		48444	Skin discolouration	0		195111	13	2020-07-10 06:08:09	2020-07-10 06:08:09	2020-07-17 12:54:26	DE002		7.9		4.121		3.781		4.602		3.3		4.811		3.09		0		0.007		0.123
16	CP288	86	Prod	1104	81	2042	23	Klinikum der Universitat Munchen- Grosshadern	DE002	World	9460	Measurements	0	5855	MEASUREMENTS	Measurements	21		48444	Skin discolouration	0		195112	14	2020-07-10 06:08:09	2020-07-10 06:08:09	2020-07-17 12:54:26	DE002		19.85		8.69		11.16		11.68		8.17		13.58		6.276		0.077		0.218		0.875
16	CP288	86	Prod	1104	81	2042	23	Klinikum der Universitat Munchen- Grosshadern	DE002	World	9460	Measurements	0	5855	MEASUREMENTS	Measurements	21		48444	Skin discolouration	0		195113	15	2020-07-10 06:08:09	2020-07-10 06:08:09	2020-07-17 12:54:26	DE002		15.69		8.277		7.413		11.29		4.397		13.18		2.504		0		0.001		0.311
16	CP288	86	Prod	1104	81	2042	23	Klinikum der Universitat Munchen- Grosshadern	DE002	World	9460	Measurements	0	5855	MEASUREMENTS	Measurements	21		48444	Skin discolouration	0		195114	16	2020-07-10 06:08:09	2020-07-10 06:08:09	2020-07-17 12:54:26	DE002		19.17		5.94		13.23		8.464		10.7		11.37		7.793		0.001		0.025		0.201
16	CP288	86	Prod	1104	81	2042	23	Klinikum der Universitat Munchen- Grosshadern	DE002	World	9460	Measurements	0	5855	MEASUREMENTS	Measurements	21		48444	Skin discolouration	0		195115	17	2020-07-10 06:08:09	2020-07-10 06:08:09	2020-07-17 12:54:26	DE002		24.29		8.669		15.62		15.19		9.098		19.74		4.554		0		0.029		0.487
16	CP288	86	Prod	1104	81	2042	23	Klinikum der Universitat Munchen- Grosshadern	DE002	World	9460	Measurements	0	5855	MEASUREMENTS	Measurements	21		48444	Skin discolouration	0		195116	18	2020-07-10 06:08:09	2020-07-10 06:08:09	2020-07-17 12:54:26	DE002		65.15		9.003		56.15		15.18		49.96		21.2		43.95		0.002		0.133		4.428
16	CP288	86	Prod	1104	81	2042	23	Klinikum der Universitat Munchen- Grosshadern	DE002	World	9460	Measurements	0	5855	MEASUREMENTS	Measurements	21		48444	Skin discolouration	0		195117	19	2020-07-10 06:08:09	2020-07-10 06:08:09	2020-07-17 12:54:26	DE002		15.95		5.514		10.43		7.299		8.654		8.625		7.328		0		0.038		0.867
16	CP288	86	Prod	1104	81	2042	23	Klinikum der Universitat Munchen- Grosshadern	DE002	World	9460	Measurements	0	5855	MEASUREMENTS	Measurements	21		48444	Skin discolouration	0		195118	20	2020-07-10 06:08:09	2020-07-10 06:08:09	2020-07-17 12:54:26	DE002		2.57		2.305		0.268		2.538		0.035		2.538		0.035		0		0		0
16	CP288	86	Prod	1104	81	2042	23	Klinikum der Universitat Munchen- Grosshadern	DE002	World	9460	Measurements	0	5855	MEASUREMENTS	Measurements	21		48444	Skin discolouration	0		195119	21	2020-07-10 06:08:09	2020-07-10 06:08:09	2020-07-17 12:54:26	DE002		20.65		5.434		15.22		9.472		11.18		12.53		8.124		0.099		1.016		1.722
16	CP288	86	Prod	1104	81	2042	23	Klinikum der Universitat Munchen- Grosshadern	DE002	World	9460	Measurements	0	5855	MEASUREMENTS	Measurements	21		48444	Skin discolouration	0		195120	22	2020-07-10 06:08:09	2020-07-10 06:08:09	2020-07-17 12:54:26	DE002		31.85		9.198		22.65		16.49		15.35		22.8		9.046		0.016		0.027		0.415
16	CP288	86	Prod	1104	81	2042	23	Klinikum der Universitat Munchen- Grosshadern	DE002	World	9460	Measurements	0	5855	MEASUREMENTS	Measurements	21		48444	Skin discolouration	0		195121	23	2020-07-10 06:08:09	2020-07-10 06:08:09	2020-07-17 12:54:26	DE002		19.8		10.82		8.98		15.25		4.552		17.41		2.393		0		0		0.04
16	CP288	86	Prod	1104	81	2042	23	Klinikum der Universitat Munchen- Grosshadern	DE002	World	9460	Measurements	0	5855	MEASUREMENTS	Measurements	21		48444	Skin discolouration	0		195122	24	2020-07-10 06:08:09	2020-07-10 06:08:09	2020-07-17 12:54:26	DE002		9.67		4.679		4.994		5.905		3.767		7.12		2.552		0		0		0.004
16	CP288	86	Prod	1104	81	2042	23	Klinikum der Universitat Munchen- Grosshadern	DE002	World	9460	Measurements	0	5855	MEASUREMENTS	Measurements	21		48444	Skin discolouration	0		195123	25	2020-07-10 06:08:09	2020-07-10 06:08:09	2020-07-17 12:54:26	DE002		24.42		10.76		13.65		17.61		6.811		21.41		3.006		0.034		0.409		0.833
16	CP288	86	Prod	1104	81	2042	23	Klinikum der Universitat Munchen- Grosshadern	DE002	World	9460	Measurements	0	5855	MEASUREMENTS	Measurements	21		48444	Skin discolouration	0		195124	26	2020-07-10 06:08:09	2020-07-10 06:08:09	2020-07-17 12:54:26	DE002		12.04		6.731		5.311		10.22		1.82		11.36		0.68		0		0		0.027
16	CP288	86	Prod	1104	81	2042	23	Klinikum der Universitat Munchen- Grosshadern	DE002	World	9460	Measurements	0	5855	MEASUREMENTS	Measurements	21		48444	Skin discolouration	0		195125	27	2020-07-10 06:08:09	2020-07-10 06:08:09	2020-07-17 12:54:26	DE002		38.4		11.33		27.07		16.87		21.53		20.74		17.66		0.007		0.428		0.586
16	CP288	86	Prod	1104	81	2042	23	Klinikum der Universitat Munchen- Grosshadern	DE002	World	9460	Measurements	0	5855	MEASUREMENTS	Measurements	21		48444	Skin discolouration	0		195126	28	2020-07-10 06:08:09	2020-07-10 06:08:09	2020-07-17 12:54:26	DE002		6.27		4.502		1.772		5.658		0.616		6.272		0.002		0		0.005		0.022
16	CP288	86	Prod	1104	81	2042	23	Klinikum der Universitat Munchen- Grosshadern	DE002	World	9460	Measurements	0	5855	MEASUREMENTS	Measurements	21		48444	Skin discolouration	0		195127	29	2020-07-10 06:08:09	2020-07-10 06:08:09	2020-07-17 12:54:26	DE002		14.98		5.745		9.236		8.613		6.368		9.673		5.308		0		0.001		0.002
16	CP288	86	Prod	1104	81	2042	23	Klinikum der Universitat Munchen- Grosshadern	DE002	World	9460	Measurements	0	5855	MEASUREMENTS	Measurements	21		48444	Skin discolouration	0		195128	30	2020-07-10 06:08:09	2020-07-10 06:08:09	2020-07-17 12:54:26	DE002		0		0		0		0		0		0		0		0		0		0
16	CP288	86	Prod	1104	81	2042	23	Klinikum der Universitat Munchen- Grosshadern	DE002	World	9460	Measurements	0	5855	MEASUREMENTS	Measurements	21		48444	Skin discolouration	0		195129	31	2020-07-10 06:08:09	2020-07-10 06:08:09	2020-07-17 12:54:26	DE002		29.39		7.25		22.14		14.47		14.92		19.84		9.549		0		0.007		0.076
16	CP288	86	Prod	1104	81	2042	23	Klinikum der Universitat Munchen- Grosshadern	DE002	World	9460	Measurements	0	5855	MEASUREMENTS	Measurements	21		48444	Skin discolouration	0		195130	32	2020-07-10 06:08:09	2020-07-10 06:08:09	2020-07-17 12:54:26	DE002		4.87		3.484		1.395		3.982		0.897		4.029		0.85		0		0.005		0.047
16	CP288	86	Prod	1104	81	2042	23	Klinikum der Universitat Munchen- Grosshadern	DE002	World	9460	Measurements	0	5855	MEASUREMENTS	Measurements	21		48444	Skin discolouration	0		195131	33	2020-07-10 06:08:09	2020-07-10 06:08:09	2020-07-17 12:54:26	DE002		24.44		9.659		14.78		17.1		7.346		21.6		2.844		0.03		0.026		0.088
16	CP288	86	Prod	1104	81	2042	23	Klinikum der Universitat Munchen- Grosshadern	DE002	World	9460	Measurements	0	5855	MEASUREMENTS	Measurements	21		48444	Skin discolouration	0		195132	34	2020-07-10 06:08:09	2020-07-10 06:08:09	2020-07-17 12:54:26	DE002		38.11		9.186		28.92		17.14		20.97		24.74		13.36		0		0.039		0.863
16	CP288	86	Prod	1104	81	2042	23	Klinikum der Universitat Munchen- Grosshadern	DE002	World	9460	Measurements	0	5855	MEASUREMENTS	Measurements	21		48444	Skin discolouration	0		195133	35	2020-07-10 06:08:09	2020-07-10 06:08:09	2020-07-17 12:54:26	DE002		15.15		5.628		9.532		8.061		7.098		9.771		5.388		0.007		0.105		0.31
16	CP288	86	Prod	1104	81	2042	23	Klinikum der Universitat Munchen- Grosshadern	DE002	World	9460	Measurements	0	5855	MEASUREMENTS	Measurements	21		48444	Skin discolouration	0		195134	36	2020-07-10 06:08:09	2020-07-10 06:08:09	2020-07-17 12:54:26	DE002		43.07		7.545		35.53		11.86		31.21		15.6		27.46		0		0		0.015
16	CP288	86	Prod	1104	81	2042	23	Klinikum der Universitat Munchen- Grosshadern	DE002	World	9460	Measurements	0	5855	MEASUREMENTS	Measurements	21		48444	Skin discolouration	0		195135	37	2020-07-10 06:08:09	2020-07-10 06:08:09	2020-07-17 12:54:26	DE002		23.3		9.975		13.33		15.42		7.886		19.63		3.669		1.508		1.821		3.383
16	CP288	86	Prod	1104	81	2042	23	Klinikum der Universitat Munchen- Grosshadern	DE002	World	9460	Measurements	0	5855	MEASUREMENTS	Measurements	21		48444	Skin discolouration	0		195136	38	2020-07-10 06:08:09	2020-07-10 06:08:09	2020-07-17 12:54:26	DE002		17.52		8.799		8.728		13.56		3.96		15.88		1.639		0.455		0.358		1.382
16	CP288	86	Prod	1104	81	2042	23	Klinikum der Universitat Munchen- Grosshadern	DE002	World	9460	Measurements	0	5855	MEASUREMENTS	Measurements	21		48444	Skin discolouration	0		195137	39	2020-07-10 06:08:09	2020-07-10 06:08:09	2020-07-17 12:54:26	DE002		39.46		8.26		31.2		13.26		26.2		17.58		21.88		0.032		0.73		2.51
16	CP288	86	Prod	1104	81	2042	23	Klinikum der Universitat Munchen- Grosshadern	DE002	World	9460	Measurements	0	5855	MEASUREMENTS	Measurements	21		48444	Skin discolouration	0		195138	40	2020-07-10 06:08:09	2020-07-10 06:08:09	2020-07-17 12:54:26	DE002		7.42		5.323		2.098		6.907		0.515		7.361		0.061		0		0.027		0.23
16	CP288	86	Prod	1104	81	2042	23	Klinikum der Universitat Munchen- Grosshadern	DE002	World	9460	Measurements	0	5855	MEASUREMENTS	Measurements	21		48444	Skin discolouration	0		195139	41	2020-07-10 06:08:09	2020-07-10 06:08:09	2020-07-17 12:54:26	DE002		33.14		9.524		23.62		16.52		16.62		24.07		9.073		0.321		0.889		3.656
16	CP288	86	Prod	1104	81	2042	23	Klinikum der Universitat Munchen- Grosshadern	DE002	World	9460	Measurements	0	5855	MEASUREMENTS	Measurements	21		48444	Skin discolouration	0		195140	42	2020-07-10 06:08:09	2020-07-10 06:08:09	2020-07-17 12:54:26	DE002		10.98		5.89		5.092		8.638		2.345		10.05		0.924		0.005		0.03		0.16
16	CP288	86	Prod	1104	81	2042	23	Klinikum der Universitat Munchen- Grosshadern	DE002	World	9460	Measurements	0	5855	MEASUREMENTS	Measurements	21		48444	Skin discolouration	0		195141	43	2020-07-10 06:08:09	2020-07-10 06:08:09	2020-07-17 12:54:26	DE002		12.2		5.535		6.673		8.867		3.341		10.69		1.514		0.177		0.852		1.348
16	CP288	86	Prod	1104	81	2042	23	Klinikum der Universitat Munchen- Grosshadern	DE002	World	9460	Measurements	0	5855	MEASUREMENTS	Measurements	21		48444	Skin discolouration	0		195142	44	2020-07-10 06:08:09	2020-07-10 06:08:09	2020-07-17 12:54:26	DE002		5.78		4.773		1.015		5.507		0.282		5.614		0.174		0.069		0.154		0.4
16	CP288	86	Prod	1105	81	2043	23	Klinikum der Universitat Munchen- Grosshadern	DE002	World	9491	Measurements	0	5855	MEASUREMENTS	Measurements	21		48504	Skin discolouration	0		131979	1	2020-07-10 06:08:17	2020-07-10 06:08:17	2020-07-17 12:54:26	DE002		13.25		5.21		8.043		6.892		6.361		7.177		6.076		0		0.073		0.532
16	CP288	86	Prod	1105	81	2043	23	Klinikum der Universitat Munchen- Grosshadern	DE002	World	9491	Measurements	0	5855	MEASUREMENTS	Measurements	21		48504	Skin discolouration	0		195236	2	2020-07-10 06:08:17	2020-07-10 06:08:17	2020-07-17 12:54:26	DE002		11.09		7.091		4.005		9.936		1.161		10.59		0.506		0.048		0.107		1.628
16	CP288	86	Prod	1105	81	2043	23	Klinikum der Universitat Munchen- Grosshadern	DE002	World	9491	Measurements	0	5855	MEASUREMENTS	Measurements	21		48504	Skin discolouration	0		195237	3	2020-07-10 06:08:17	2020-07-10 06:08:17	2020-07-17 12:54:26	DE002		17.25		8.531		8.723		12.6		4.652		14.89		2.36		0.051		0.137		0.187
16	CP288	86	Prod	1105	81	2043	23	Klinikum der Universitat Munchen- Grosshadern	DE002	World	9491	Measurements	0	5855	MEASUREMENTS	Measurements	21		48504	Skin discolouration	0		195238	4	2020-07-10 06:08:17	2020-07-10 06:08:17	2020-07-17 12:54:26	DE002		19.37		5.814		13.56		9.995		9.385		12.86		6.513		0		0.015		0.082
16	CP288	86	Prod	1105	81	2043	23	Klinikum der Universitat Munchen- Grosshadern	DE002	World	9491	Measurements	0	5855	MEASUREMENTS	Measurements	21		48504	Skin discolouration	0		195239	5	2020-07-10 06:08:17	2020-07-10 06:08:17	2020-07-17 12:54:26	DE002		11.03		6.446		4.591		8.658		2.378		9.412		1.624		0.026		0.288		2.066
16	CP288	86	Prod	1105	81	2043	23	Klinikum der Universitat Munchen- Grosshadern	DE002	World	9491	Measurements	0	5855	MEASUREMENTS	Measurements	21		48504	Skin discolouration	0		195240	6	2020-07-10 06:08:17	2020-07-10 06:08:17	2020-07-17 12:54:26	DE002		25.23		5.552		19.68		9.532		15.7		11.69		13.54		0		0		0.071
16	CP288	86	Prod	1105	81	2043	23	Klinikum der Universitat Munchen- Grosshadern	DE002	World	9491	Measurements	0	5855	MEASUREMENTS	Measurements	21		48504	Skin discolouration	0		195241	7	2020-07-10 06:08:17	2020-07-10 06:08:17	2020-07-17 12:54:26	DE002		21.82		7.9		13.92		13.54		8.285		17.44		4.385		0		0.002		0.021
16	CP288	86	Prod	1105	81	2043	23	Klinikum der Universitat Munchen- Grosshadern	DE002	World	9491	Measurements	0	5855	MEASUREMENTS	Measurements	21		48504	Skin discolouration	0		195242	8	2020-07-10 06:08:17	2020-07-10 06:08:17	2020-07-17 12:54:26	DE002		17.43		4.368		13.06		6.807		10.62		8.294		9.141		0		0.209		1.798
16	CP288	86	Prod	1105	81	2043	23	Klinikum der Universitat Munchen- Grosshadern	DE002	World	9491	Measurements	0	5855	MEASUREMENTS	Measurements	21		48504	Skin discolouration	0		195243	9	2020-07-10 06:08:17	2020-07-10 06:08:17	2020-07-17 12:54:26	DE002		21.4		6.562		14.84		11.09		10.3		15.88		5.518		0		0		0.015
16	CP288	86	Prod	1105	81	2043	23	Klinikum der Universitat Munchen- Grosshadern	DE002	World	9491	Measurements	0	5855	MEASUREMENTS	Measurements	21		48504	Skin discolouration	0		195244	10	2020-07-10 06:08:17	2020-07-10 06:08:17	2020-07-17 12:54:26	DE002		8.88		4.772		4.108		5.649		3.231		6.064		2.816		1.096		2.054		1.809
16	CP288	86	Prod	1105	81	2043	23	Klinikum der Universitat Munchen- Grosshadern	DE002	World	9491	Measurements	0	5855	MEASUREMENTS	Measurements	21		48504	Skin discolouration	0		195245	11	2020-07-10 06:08:17	2020-07-10 06:08:17	2020-07-17 12:54:26	DE002		16.24		8.741		7.508		9.964		6.284		10.06		6.18		0		0		0
16	CP288	86	Prod	1105	81	2043	23	Klinikum der Universitat Munchen- Grosshadern	DE002	World	9491	Measurements	0	5855	MEASUREMENTS	Measurements	21		48504	Skin discolouration	0		195246	12	2020-07-10 06:08:17	2020-07-10 06:08:17	2020-07-17 12:54:26	DE002		25.57		6.434		19.13		8.754		16.81		10.44		15.12		1.063		1.926		2.529
16	CP288	86	Prod	1105	81	2043	23	Klinikum der Universitat Munchen- Grosshadern	DE002	World	9491	Measurements	0	5855	MEASUREMENTS	Measurements	21		48504	Skin discolouration	0		195247	13	2020-07-10 06:08:17	2020-07-10 06:08:17	2020-07-17 12:54:26	DE002		9.48		4.877		4.609		6.701		2.785		7.241		2.245		0.003		0.047		0.442
16	CP288	86	Prod	1105	81	2043	23	Klinikum der Universitat Munchen- Grosshadern	DE002	World	9491	Measurements	0	5855	MEASUREMENTS	Measurements	21		48504	Skin discolouration	0		195248	14	2020-07-10 06:08:17	2020-07-10 06:08:17	2020-07-17 12:54:26	DE002		7.02		5.414		1.613		6.859		0.168		7.027		0		0		0		0.001
16	CP288	86	Prod	1105	81	2043	23	Klinikum der Universitat Munchen- Grosshadern	DE002	World	9491	Measurements	0	5855	MEASUREMENTS	Measurements	21		48504	Skin discolouration	0		195249	15	2020-07-10 06:08:17	2020-07-10 06:08:17	2020-07-17 12:54:26	DE002		8.73		6.14		2.599		7.566		1.173		7.716		1.023		0.008		0.009		0.005
16	CP288	86	Prod	1105	81	2043	23	Klinikum der Universitat Munchen- Grosshadern	DE002	World	9491	Measurements	0	5855	MEASUREMENTS	Measurements	21		48504	Skin discolouration	0		195250	16	2020-07-10 06:08:17	2020-07-10 06:08:17	2020-07-17 12:54:26	DE002		8		4.873		3.13		6.41		1.593		6.88		1.123		0		0		0.002
16	CP288	86	Prod	1105	81	2043	23	Klinikum der Universitat Munchen- Grosshadern	DE002	World	9491	Measurements	0	5855	MEASUREMENTS	Measurements	21		48504	Skin discolouration	0		195251	17	2020-07-10 06:08:17	2020-07-10 06:08:17	2020-07-17 12:54:26	DE002		24.01		6.986		17.03		9.407		14.6		10.54		13.47		0.006		0.093		1.157
16	CP288	86	Prod	1105	81	2043	23	Klinikum der Universitat Munchen- Grosshadern	DE002	World	9491	Measurements	0	5855	MEASUREMENTS	Measurements	21		48504	Skin discolouration	0		195252	18	2020-07-10 06:08:17	2020-07-10 06:08:17	2020-07-17 12:54:26	DE002		5.51		3.253		2.266		3.612		1.908		3.718		1.802		0		0.04		0.538
16	CP288	86	Prod	1105	81	2043	23	Klinikum der Universitat Munchen- Grosshadern	DE002	World	9491	Measurements	0	5855	MEASUREMENTS	Measurements	21		48504	Skin discolouration	0		195253	19	2020-07-10 06:08:17	2020-07-10 06:08:17	2020-07-17 12:54:26	DE002		6.58		3.715		2.867		5.52		1.062		6.19		0.391		0.02		0.132		0.388
16	CP288	86	Prod	1105	81	2043	23	Klinikum der Universitat Munchen- Grosshadern	DE002	World	9491	Measurements	0	5855	MEASUREMENTS	Measurements	21		48504	Skin discolouration	0		195254	20	2020-07-10 06:08:17	2020-07-10 06:08:17	2020-07-17 12:54:26	DE002		25.38		7.069		18.31		13.59		11.79		18.25		7.133		0		0.008		0.066
16	CP288	86	Prod	1105	81	2043	23	Klinikum der Universitat Munchen- Grosshadern	DE002	World	9491	Measurements	0	5855	MEASUREMENTS	Measurements	21		48504	Skin discolouration	0		195255	21	2020-07-10 06:08:17	2020-07-10 06:08:17	2020-07-17 12:54:26	DE002		10.37		5.808		4.564		9.043		1.328		10.31		0.055		0.061		0.493		1.695
16	CP288	86	Prod	1105	81	2043	23	Klinikum der Universitat Munchen- Grosshadern	DE002	World	9491	Measurements	0	5855	MEASUREMENTS	Measurements	21		48504	Skin discolouration	0		195256	22	2020-07-10 06:08:17	2020-07-10 06:08:17	2020-07-17 12:54:26	DE002		13.44		7.614		5.827		10.58		2.854		11.58		1.856		0		0		0.001
16	CP288	86	Prod	1105	81	2043	23	Klinikum der Universitat Munchen- Grosshadern	DE002	World	9491	Measurements	0	5855	MEASUREMENTS	Measurements	21		48504	Skin discolouration	0		195257	23	2020-07-10 06:08:17	2020-07-10 06:08:17	2020-07-17 12:54:26	DE002		8.82		5.886		2.938		7.576		1.248		7.811		1.013		0.405		1.074		2.736
16	CP288	86	Prod	1105	81	2043	23	Klinikum der Universitat Munchen- Grosshadern	DE002	World	9491	Measurements	0	5855	MEASUREMENTS	Measurements	21		48504	Skin discolouration	0		195258	24	2020-07-10 06:08:17	2020-07-10 06:08:17	2020-07-17 12:54:26	DE002		23.79		6.815		16.98		8.754		15.04		10.01		13.78		0.293		1.694		3.591
16	CP288	86	Prod	1105	81	2043	23	Klinikum der Universitat Munchen- Grosshadern	DE002	World	9491	Measurements	0	5855	MEASUREMENTS	Measurements	21		48504	Skin discolouration	0		195259	25	2020-07-10 06:08:17	2020-07-10 06:08:17	2020-07-17 12:54:26	DE002		7.84		4.456		3.386		5.308		2.533		6.018		1.823		0		0		0.005
16	CP288	86	Prod	1105	81	2043	23	Klinikum der Universitat Munchen- Grosshadern	DE002	World	9491	Measurements	0	5855	MEASUREMENTS	Measurements	21		48504	Skin discolouration	0		195260	26	2020-07-10 06:08:17	2020-07-10 06:08:17	2020-07-17 12:54:26	DE002		7.18		5.543		1.645		6.592		0.596		6.69		0.498		0.009		0.179		0.587
16	CP288	86	Prod	1105	81	2043	23	Klinikum der Universitat Munchen- Grosshadern	DE002	World	9491	Measurements	0	5855	MEASUREMENTS	Measurements	21		48504	Skin discolouration	0		195261	27	2020-07-10 06:08:17	2020-07-10 06:08:17	2020-07-17 12:54:26	DE002		12.41		3.224		9.191		3.848		8.567		4.69		7.725		0		0		0.001
16	CP288	86	Prod	1105	81	2043	23	Klinikum der Universitat Munchen- Grosshadern	DE002	World	9491	Measurements	0	5855	MEASUREMENTS	Measurements	21		48504	Skin discolouration	0		195262	28	2020-07-10 06:08:17	2020-07-10 06:08:17	2020-07-17 12:54:26	DE002		10.97		5.721		5.259		7.662		3.317		8.533		2.447		0.001		0.004		0.072
16	CP288	86	Prod	1105	81	2043	23	Klinikum der Universitat Munchen- Grosshadern	DE002	World	9491	Measurements	0	5855	MEASUREMENTS	Measurements	21		48504	Skin discolouration	0		195263	29	2020-07-10 06:08:17	2020-07-10 06:08:17	2020-07-17 12:54:26	DE002		3.81		3.345		0.471		3.661		0.155		3.763		0.054		0		0		0
16	CP288	86	Prod	1105	81	2043	23	Klinikum der Universitat Munchen- Grosshadern	DE002	World	9491	Measurements	0	5855	MEASUREMENTS	Measurements	21		48504	Skin discolouration	0		195264	30	2020-07-10 06:08:17	2020-07-10 06:08:17	2020-07-17 12:54:26	DE002		8.86		4.657		4.204		5.503		3.358		5.791		3.07		0		0.008		0.12
16	CP288	86	Prod	1105	81	2043	23	Klinikum der Universitat Munchen- Grosshadern	DE002	World	9491	Measurements	0	5855	MEASUREMENTS	Measurements	21		48504	Skin discolouration	0		195265	31	2020-07-10 06:08:17	2020-07-10 06:08:17	2020-07-17 12:54:26	DE002		9.97		4.834		5.145		6.278		3.701		6.505		3.474		0.137		0.989		2.249
16	CP288	86	Prod	1105	81	2043	23	Klinikum der Universitat Munchen- Grosshadern	DE002	World	9491	Measurements	0	5855	MEASUREMENTS	Measurements	21		48504	Skin discolouration	0		195266	32	2020-07-10 06:08:17	2020-07-10 06:08:17	2020-07-17 12:54:26	DE002		6.96		4.778		2.191		5.821		1.148		6.063		0.906		0		0		0.045
16	CP288	86	Prod	1105	81	2043	23	Klinikum der Universitat Munchen- Grosshadern	DE002	World	9491	Measurements	0	5855	MEASUREMENTS	Measurements	21		48504	Skin discolouration	0		195267	33	2020-07-10 06:08:17	2020-07-10 06:08:17	2020-07-17 12:54:26	DE002		7.05		4.804		2.246		6.179		0.871		6.587		0.463		0		0		0
16	CP288	86	Prod	1105	81	2043	23	Klinikum der Universitat Munchen- Grosshadern	DE002	World	9491	Measurements	0	5855	MEASUREMENTS	Measurements	21		48504	Skin discolouration	0		195268	34	2020-07-10 06:08:17	2020-07-10 06:08:17	2020-07-17 12:54:26	DE002		18.29		9.06		9.231		13.63		4.659		15.34		2.944		0		0.002		1.686
16	CP288	86	Prod	1105	81	2043	23	Klinikum der Universitat Munchen- Grosshadern	DE002	World	9491	Measurements	0	5855	MEASUREMENTS	Measurements	21		48504	Skin discolouration	0		195269	35	2020-07-10 06:08:17	2020-07-10 06:08:17	2020-07-17 12:54:26	DE002		5.53		3.056		2.478		3.906		1.627		3.958		1.575		0		0		0
16	CP288	86	Prod	1105	81	2043	23	Klinikum der Universitat Munchen- Grosshadern	DE002	World	9491	Measurements	0	5855	MEASUREMENTS	Measurements	21		48504	Skin discolouration	0		195270	36	2020-07-10 06:08:17	2020-07-10 06:08:17	2020-07-17 12:54:26	DE002		27.14		7.323		19.81		13.27		13.86		16.45		10.68		0		0.001		0.009
16	CP288	86	Prod	1105	81	2043	23	Klinikum der Universitat Munchen- Grosshadern	DE002	World	9491	Measurements	0	5855	MEASUREMENTS	Measurements	21		48504	Skin discolouration	0		195271	37	2020-07-10 06:08:17	2020-07-10 06:08:17	2020-07-17 12:54:26	DE002		5.13		3.854		1.283		4.307		0.831		4.476		0.661		0		0.015		0.094
16	CP288	86	Prod	1105	81	2043	23	Klinikum der Universitat Munchen- Grosshadern	DE002	World	9491	Measurements	0	5855	MEASUREMENTS	Measurements	21		48504	Skin discolouration	0		195272	38	2020-07-10 06:08:17	2020-07-10 06:08:17	2020-07-17 12:54:26	DE002		6.68		4.154		2.528		5.84		0.843		5.957		0.726		0.002		0.069		0.394
16	CP288	86	Prod	1105	81	2043	23	Klinikum der Universitat Munchen- Grosshadern	DE002	World	9491	Measurements	0	5855	MEASUREMENTS	Measurements	21		48504	Skin discolouration	0		195273	39	2020-07-10 06:08:17	2020-07-10 06:08:17	2020-07-17 12:54:26	DE002		15.04		6.904		8.143		10.75		4.289		12.15		2.897		0.013		0.981		2.49
16	CP288	86	Prod	1105	81	2043	23	Klinikum der Universitat Munchen- Grosshadern	DE002	World	9491	Measurements	0	5855	MEASUREMENTS	Measurements	21		48504	Skin discolouration	0		195274	40	2020-07-10 06:08:17	2020-07-10 06:08:17	2020-07-17 12:54:26	DE002		24.03		7.486		16.54		11.81		12.21		13.23		10.79		0.006		0.106		2.159
16	CP288	86	Prod	1105	81	2043	23	Klinikum der Universitat Munchen- Grosshadern	DE002	World	9491	Measurements	0	5855	MEASUREMENTS	Measurements	21		48504	Skin discolouration	0		195275	41	2020-07-10 06:08:17	2020-07-10 06:08:17	2020-07-17 12:54:26	DE002		15.63		6.813		8.818		11.35		4.275		14.25		1.381		0		0		0.008
16	CP288	86	Prod	1105	81	2043	23	Klinikum der Universitat Munchen- Grosshadern	DE002	World	9491	Measurements	0	5855	MEASUREMENTS	Measurements	21		48504	Skin discolouration	0		195276	42	2020-07-10 06:08:17	2020-07-10 06:08:17	2020-07-17 12:54:26	DE002		15.17		6.557		8.617		9.18		5.993		9.947		5.226		0.046		0.423		2.206
16	CP288	86	Prod	1105	81	2043	23	Klinikum der Universitat Munchen- Grosshadern	DE002	World	9491	Measurements	0	5855	MEASUREMENTS	Measurements	21		48504	Skin discolouration	0		195277	43	2020-07-10 06:08:17	2020-07-10 06:08:17	2020-07-17 12:54:26	DE002		14.75		5.118		9.64		7.148		7.61		8.139		6.619		0		0.011		0.408
16	CP288	86	Prod	1105	81	2043	23	Klinikum der Universitat Munchen- Grosshadern	DE002	World	9491	Measurements	0	5855	MEASUREMENTS	Measurements	21		48504	Skin discolouration	0		195278	44	2020-07-10 06:08:17	2020-07-10 06:08:17	2020-07-17 12:54:26	DE002		3.85		1.947		1.91		2.005		1.852		2.011		1.846		0.021		0.191		1.114
16	CP288	86	Prod	1105	81	2043	23	Klinikum der Universitat Munchen- Grosshadern	DE002	World	9491	Measurements	0	5855	MEASUREMENTS	Measurements	21		48504	Skin discolouration	0		195279	45	2020-07-10 06:08:17	2020-07-10 06:08:17	2020-07-17 12:54:26	DE002		8.18		5.237		2.949		6.984		1.201		7.638		0.547		0		0.001		0.19
16	CP288	86	Prod	1105	81	2043	23	Klinikum der Universitat Munchen- Grosshadern	DE002	World	9491	Measurements	0	5855	MEASUREMENTS	Measurements	21		48504	Skin discolouration	0		195280	46	2020-07-10 06:08:17	2020-07-10 06:08:17	2020-07-17 12:54:26	DE002		10.77		4.256		6.517		6.149		4.624		6.314		4.459		0		0.019		0.939
16	CP288	86	Prod	1105	81	2043	23	Klinikum der Universitat Munchen- Grosshadern	DE002	World	9491	Measurements	0	5855	MEASUREMENTS	Measurements	21		48504	Skin discolouration	0		195281	47	2020-07-10 06:08:17	2020-07-10 06:08:17	2020-07-17 12:54:26	DE002		7.88		3.111		4.778		3.901		3.988		3.947		3.942		0.011		0.169		1.722
16	CP288	86	Prod	1105	81	2043	23	Klinikum der Universitat Munchen- Grosshadern	DE002	World	9491	Measurements	0	5855	MEASUREMENTS	Measurements	21		48504	Skin discolouration	0		195282	48	2020-07-10 06:08:17	2020-07-10 06:08:17	2020-07-17 12:54:26	DE002		3.71		3.06		0.66		3.387		0.332		3.536		0.183		0		0		0
16	CP288	86	Prod	1105	81	2043	23	Klinikum der Universitat Munchen- Grosshadern	DE002	World	9491	Measurements	0	5855	MEASUREMENTS	Measurements	21		48504	Skin discolouration	0		195283	49	2020-07-10 06:08:17	2020-07-10 06:08:17	2020-07-17 12:54:26	DE002		11.6		6.175		5.432		9.297		2.311		10.34		1.262		0		0		0.217
16	CP288	86	Prod	1105	81	2043	23	Klinikum der Universitat Munchen- Grosshadern	DE002	World	9491	Measurements	0	5855	MEASUREMENTS	Measurements	21		48504	Skin discolouration	0		195284	50	2020-07-10 06:08:17	2020-07-10 06:08:17	2020-07-17 12:54:26	DE002		8.74		5.665		3.084		7.015		1.735		7.611		1.139		0		0		0.031
16	CP288	86	Prod	1105	81	2043	23	Klinikum der Universitat Munchen- Grosshadern	DE002	World	9491	Measurements	0	5855	MEASUREMENTS	Measurements	21		48504	Skin discolouration	0		195285	51	2020-07-10 06:08:17	2020-07-10 06:08:17	2020-07-17 12:54:26	DE002		25.09		5.547		19.54		7.505		17.58		8.739		16.35		0		0.002		0.125
16	CP288	86	Prod	1105	81	2043	23	Klinikum der Universitat Munchen- Grosshadern	DE002	World	9491	Measurements	0	5855	MEASUREMENTS	Measurements	21		48504	Skin discolouration	0		195286	52	2020-07-10 06:08:17	2020-07-10 06:08:17	2020-07-17 12:54:26	DE002		17.85		6.348		11.5		9.264		8.592		11.86		5.988		0		0		0.018
16	CP288	86	Prod	1105	81	2043	23	Klinikum der Universitat Munchen- Grosshadern	DE002	World	9491	Measurements	0	5855	MEASUREMENTS	Measurements	21		48504	Skin discolouration	0		195287	53	2020-07-10 06:08:17	2020-07-10 06:08:17	2020-07-17 12:54:26	DE002		5.12		3.84		1.286		4.919		0.207		4.99		0.135		0.009		0.002		0.019
16	CP288	86	Prod	1105	81	2043	23	Klinikum der Universitat Munchen- Grosshadern	DE002	World	9491	Measurements	0	5855	MEASUREMENTS	Measurements	21		48504	Skin discolouration	0		195288	54	2020-07-10 06:08:17	2020-07-10 06:08:17	2020-07-17 12:54:26	DE002		9.61		5.667		3.952		7.692		1.927		8.2		1.419		0		0.055		0.897
16	CP288	86	Prod	1105	81	2043	23	Klinikum der Universitat Munchen- Grosshadern	DE002	World	9491	Measurements	0	5855	MEASUREMENTS	Measurements	21		48504	Skin discolouration	0		195289	55	2020-07-10 06:08:17	2020-07-10 06:08:17	2020-07-17 12:54:26	DE002		9.61		4.563		5.051		6.253		3.361		6.935		2.679		0.235		1.453		2.338
16	CP288	86	Prod	1105	81	2043	23	Klinikum der Universitat Munchen- Grosshadern	DE002	World	9491	Measurements	0	5855	MEASUREMENTS	Measurements	21		48504	Skin discolouration	0		195290	56	2020-07-10 06:08:17	2020-07-10 06:08:17	2020-07-17 12:54:26	DE002		5.9		3.513		2.391		4.886		1.017		5.375		0.529		0		0		0
16	CP288	86	Prod	1105	81	2043	23	Klinikum der Universitat Munchen- Grosshadern	DE002	World	9491	Measurements	0	5855	MEASUREMENTS	Measurements	21		48504	Skin discolouration	0		195291	57	2020-07-10 06:08:17	2020-07-10 06:08:17	2020-07-17 12:54:26	DE002		6.53		4.062		2.468		5.479		1.051		6.104		0.426		0		0.003		0.059
16	CP288	86	Prod	1105	81	2043	23	Klinikum der Universitat Munchen- Grosshadern	DE002	World	9491	Measurements	0	5855	MEASUREMENTS	Measurements	21		48504	Skin discolouration	0		195292	58	2020-07-10 06:08:17	2020-07-10 06:08:17	2020-07-17 12:54:26	DE002		12.42		4.95		7.477		7.889		4.539		9.198		3.229		0		0.001		0.076
16	CP288	86	Prod	1105	81	2043	23	Klinikum der Universitat Munchen- Grosshadern	DE002	World	9491	Measurements	0	5855	MEASUREMENTS	Measurements	21		48504	Skin discolouration	0		195293	59	2020-07-10 06:08:17	2020-07-10 06:08:17	2020-07-17 12:54:26	DE002		11.9		7.913		3.988		10.89		1.005		11.56		0.341		0.003		0.017		0.448
16	CP288	86	Prod	1105	81	2043	23	Klinikum der Universitat Munchen- Grosshadern	DE002	World	9491	Measurements	0	5855	MEASUREMENTS	Measurements	21		48504	Skin discolouration	0		195294	60	2020-07-10 06:08:17	2020-07-10 06:08:17	2020-07-17 12:54:26	DE002		15.15		4.904		10.24		6.355		8.799		6.657		8.496		0		0.004		0.028
16	CP288	86	Prod	1105	81	2043	23	Klinikum der Universitat Munchen- Grosshadern	DE002	World	9491	Measurements	0	5855	MEASUREMENTS	Measurements	21		48504	Skin discolouration	0		195295	61	2020-07-10 06:08:17	2020-07-10 06:08:17	2020-07-17 12:54:26	DE002		14.83		5.552		9.283		8.579		6.256		10.59		4.236		0		0.009		0.083
16	CP288	86	Prod	1105	81	2043	23	Klinikum der Universitat Munchen- Grosshadern	DE002	World	9491	Measurements	0	5855	MEASUREMENTS	Measurements	21		48504	Skin discolouration	0		195296	62	2020-07-10 06:08:17	2020-07-10 06:08:17	2020-07-17 12:54:26	DE002		34.14		9.21		24.93		15.85		18.28		18.99		15.14		0		0		0.001
16	CP288	86	Prod	1105	81	2043	23	Klinikum der Universitat Munchen- Grosshadern	DE002	World	9491	Measurements	0	5855	MEASUREMENTS	Measurements	21		48504	Skin discolouration	0		195297	63	2020-07-10 06:08:17	2020-07-10 06:08:17	2020-07-17 12:54:26	DE002		8.5		3.357		5.149		3.705		4.801		3.758		4.748		0.001		0.209		1.729
16	CP288	86	Prod	1106	81	2044	23	Klinikum der Universitat Munchen- Grosshadern	DE002	World	9522	Measurements	0	5855	MEASUREMENTS	Measurements	21		48564	Skin discolouration	0		132108	1	2020-07-10 06:08:12	2020-07-10 06:08:12	2020-07-17 12:54:26	DE002		12.1		1.538		10.57		2.492		9.617		3.546		8.564		0.044		0.917		1.641
16	CP288	86	Prod	1106	81	2044	23	Klinikum der Universitat Munchen- Grosshadern	DE002	World	9522	Measurements	0	5855	MEASUREMENTS	Measurements	21		48564	Skin discolouration	0		195143	2	2020-07-10 06:08:12	2020-07-10 06:08:12	2020-07-17 12:54:26	DE002		13.78		2.142		11.63		3.944		9.836		5.168		8.613		0.077		0.15		1.827
16	CP288	86	Prod	1106	81	2044	23	Klinikum der Universitat Munchen- Grosshadern	DE002	World	9522	Measurements	0	5855	MEASUREMENTS	Measurements	21		48564	Skin discolouration	0		195144	3	2020-07-10 06:08:12	2020-07-10 06:08:12	2020-07-17 12:54:26	DE002		10.21		1.893		8.32		2.881		7.333		3.118		7.096		0.18		0.796		1.79
16	CP288	86	Prod	1106	81	2044	23	Klinikum der Universitat Munchen- Grosshadern	DE002	World	9522	Measurements	0	5855	MEASUREMENTS	Measurements	21		48564	Skin discolouration	0		195145	4	2020-07-10 06:08:12	2020-07-10 06:08:12	2020-07-17 12:54:26	DE002		7.08		3.513		3.57		5.032		2.051		5.297		1.786		0.073		0.171		0.375
16	CP288	86	Prod	1106	81	2044	23	Klinikum der Universitat Munchen- Grosshadern	DE002	World	9522	Measurements	0	5855	MEASUREMENTS	Measurements	21		48564	Skin discolouration	0		195146	5	2020-07-10 06:08:12	2020-07-10 06:08:12	2020-07-17 12:54:26	DE002		11.8		1.218		10.58		1.599		10.2		1.673		10.12		0.021		0.11		0.896
16	CP288	86	Prod	1106	81	2044	23	Klinikum der Universitat Munchen- Grosshadern	DE002	World	9522	Measurements	0	5855	MEASUREMENTS	Measurements	21		48564	Skin discolouration	0		195147	6	2020-07-10 06:08:12	2020-07-10 06:08:12	2020-07-17 12:54:26	DE002		7.4		1.511		5.894		2.06		5.345		2.695		4.71		0.018		0.059		0.324
16	CP288	86	Prod	1106	81	2044	23	Klinikum der Universitat Munchen- Grosshadern	DE002	World	9522	Measurements	0	5855	MEASUREMENTS	Measurements	21		48564	Skin discolouration	0		195148	7	2020-07-10 06:08:12	2020-07-10 06:08:12	2020-07-17 12:54:26	DE002		17.88		2.292		15.59		3.354		14.53		4.006		13.88		0.061		1.065		4.973
16	CP288	86	Prod	1106	81	2044	23	Klinikum der Universitat Munchen- Grosshadern	DE002	World	9522	Measurements	0	5855	MEASUREMENTS	Measurements	21		48564	Skin discolouration	0		195149	8	2020-07-10 06:08:12	2020-07-10 06:08:12	2020-07-17 12:54:26	DE002		14.97		1.092		13.88		1.834		13.14		2.026		12.95		0.102		0.268		1.481
16	CP288	86	Prod	1106	81	2044	23	Klinikum der Universitat Munchen- Grosshadern	DE002	World	9522	Measurements	0	5855	MEASUREMENTS	Measurements	21		48564	Skin discolouration	0		195150	9	2020-07-10 06:08:12	2020-07-10 06:08:12	2020-07-17 12:54:26	DE002		12.77		3.98		8.791		5.409		7.362		6.458		6.312		0.012		0.038		0.267
16	CP288	86	Prod	1106	81	2044	23	Klinikum der Universitat Munchen- Grosshadern	DE002	World	9522	Measurements	0	5855	MEASUREMENTS	Measurements	21		48564	Skin discolouration	0		195151	10	2020-07-10 06:08:12	2020-07-10 06:08:12	2020-07-17 12:54:26	DE002		19.54		3.114		16.43		5.048		14.49		7.261		12.28		0.349		0.389		0.818
16	CP288	86	Prod	1106	81	2044	23	Klinikum der Universitat Munchen- Grosshadern	DE002	World	9522	Measurements	0	5855	MEASUREMENTS	Measurements	21		48564	Skin discolouration	0		195152	11	2020-07-10 06:08:12	2020-07-10 06:08:12	2020-07-17 12:54:26	DE002		11.88		1.98		9.902		2.919		8.963		3.325		8.557		0.039		0.096		0.548
16	CP288	86	Prod	1106	81	2044	23	Klinikum der Universitat Munchen- Grosshadern	DE002	World	9522	Measurements	0	5855	MEASUREMENTS	Measurements	21		48564	Skin discolouration	0		195153	12	2020-07-10 06:08:12	2020-07-10 06:08:12	2020-07-17 12:54:26	DE002		13.03		0.864		12.17		0.974		12.06		0.992		12.04		0.025		0.109		1.46
16	CP288	86	Prod	1106	81	2044	23	Klinikum der Universitat Munchen- Grosshadern	DE002	World	9522	Measurements	0	5855	MEASUREMENTS	Measurements	21		48564	Skin discolouration	0		195154	13	2020-07-10 06:08:12	2020-07-10 06:08:12	2020-07-17 12:54:26	DE002		12.17		0.94		11.23		1.007		11.16		1.107		11.06		0.061		0.116		1.103
16	CP288	86	Prod	1106	81	2044	23	Klinikum der Universitat Munchen- Grosshadern	DE002	World	9522	Measurements	0	5855	MEASUREMENTS	Measurements	21		48564	Skin discolouration	0		195155	14	2020-07-10 06:08:12	2020-07-10 06:08:12	2020-07-17 12:54:26	DE002		8.54		1.727		6.82		2.123		6.424		2.819		5.727		0.293		0.357		0.839
16	CP288	86	Prod	1106	81	2044	23	Klinikum der Universitat Munchen- Grosshadern	DE002	World	9522	Measurements	0	5855	MEASUREMENTS	Measurements	21		48564	Skin discolouration	0		195156	15	2020-07-10 06:08:12	2020-07-10 06:08:12	2020-07-17 12:54:26	DE002		12.61		0.542		12.06		0.83		11.78		0.892		11.71		0.026		0.041		0.591
16	CP288	86	Prod	1106	81	2044	23	Klinikum der Universitat Munchen- Grosshadern	DE002	World	9522	Measurements	0	5855	MEASUREMENTS	Measurements	21		48564	Skin discolouration	0		195157	16	2020-07-10 06:08:12	2020-07-10 06:08:12	2020-07-17 12:54:26	DE002		19.25		2.522		16.73		4.032		15.22		5.848		13.4		1.058		1.059		1.029
16	CP288	86	Prod	1106	81	2044	23	Klinikum der Universitat Munchen- Grosshadern	DE002	World	9522	Measurements	0	5855	MEASUREMENTS	Measurements	21		48564	Skin discolouration	0		195158	17	2020-07-10 06:08:12	2020-07-10 06:08:12	2020-07-17 12:54:26	DE002		16.99		1.351		15.64		2.523		14.47		3.173		13.82		0.088		0.4		1.157
16	CP288	86	Prod	1106	81	2044	23	Klinikum der Universitat Munchen- Grosshadern	DE002	World	9522	Measurements	0	5855	MEASUREMENTS	Measurements	21		48564	Skin discolouration	0		195159	18	2020-07-10 06:08:12	2020-07-10 06:08:12	2020-07-17 12:54:26	DE002		8.65		2.501		6.153		3.884		4.769		4.313		4.34		0.003		0.726		1.893
16	CP288	86	Prod	1106	81	2044	23	Klinikum der Universitat Munchen- Grosshadern	DE002	World	9522	Measurements	0	5855	MEASUREMENTS	Measurements	21		48564	Skin discolouration	0		195160	19	2020-07-10 06:08:12	2020-07-10 06:08:12	2020-07-17 12:54:26	DE002		19.89		2.334		17.56		3.607		16.29		3.904		15.99		0.055		0.519		0.965
16	CP288	86	Prod	1106	81	2044	23	Klinikum der Universitat Munchen- Grosshadern	DE002	World	9522	Measurements	0	5855	MEASUREMENTS	Measurements	21		48564	Skin discolouration	0		195161	20	2020-07-10 06:08:12	2020-07-10 06:08:12	2020-07-17 12:54:26	DE002		8.25		2.123		6.13		3.079		5.174		3.257		4.996		0.078		0.13		0.27
16	CP288	86	Prod	1106	81	2044	23	Klinikum der Universitat Munchen- Grosshadern	DE002	World	9522	Measurements	0	5855	MEASUREMENTS	Measurements	21		48564	Skin discolouration	0		195162	21	2020-07-10 06:08:12	2020-07-10 06:08:12	2020-07-17 12:54:26	DE002		21.75		1.02		20.73		1.297		20.46		1.408		20.34		1.554		2.085		3.801
16	CP288	86	Prod	1106	81	2044	23	Klinikum der Universitat Munchen- Grosshadern	DE002	World	9522	Measurements	0	5855	MEASUREMENTS	Measurements	21		48564	Skin discolouration	0		195163	22	2020-07-10 06:08:12	2020-07-10 06:08:12	2020-07-17 12:54:26	DE002		13.58		2.535		11.05		3.417		10.17		3.724		9.864		0.009		0.122		0.952
16	CP288	86	Prod	1106	81	2044	23	Klinikum der Universitat Munchen- Grosshadern	DE002	World	9522	Measurements	0	5855	MEASUREMENTS	Measurements	21		48564	Skin discolouration	0		195164	23	2020-07-10 06:08:12	2020-07-10 06:08:12	2020-07-17 12:54:26	DE002		10.03		3.149		6.889		3.618		6.419		4.45		5.588		0.005		0.204		0.526
16	CP288	86	Prod	1106	81	2044	23	Klinikum der Universitat Munchen- Grosshadern	DE002	World	9522	Measurements	0	5855	MEASUREMENTS	Measurements	21		48564	Skin discolouration	0		195165	24	2020-07-10 06:08:12	2020-07-10 06:08:12	2020-07-17 12:54:26	DE002		17.23		1.067		16.16		1.755		15.47		1.958		15.27		0.09		0.701		0.403
16	CP288	86	Prod	1106	81	2044	23	Klinikum der Universitat Munchen- Grosshadern	DE002	World	9522	Measurements	0	5855	MEASUREMENTS	Measurements	21		48564	Skin discolouration	0		195166	25	2020-07-10 06:08:12	2020-07-10 06:08:12	2020-07-17 12:54:26	DE002		13.63		2.282		11.34		3.064		10.56		3.335		10.29		0.087		3.637		3.618
16	CP288	86	Prod	1106	81	2044	23	Klinikum der Universitat Munchen- Grosshadern	DE002	World	9522	Measurements	0	5855	MEASUREMENTS	Measurements	21		48564	Skin discolouration	0		195167	26	2020-07-10 06:08:12	2020-07-10 06:08:12	2020-07-17 12:54:26	DE002		12.46		2.903		9.566		4.348		8.121		4.635		7.834		0.372		0.406		0.813
16	CP288	86	Prod	1106	81	2044	23	Klinikum der Universitat Munchen- Grosshadern	DE002	World	9522	Measurements	0	5855	MEASUREMENTS	Measurements	21		48564	Skin discolouration	0		195168	27	2020-07-10 06:08:12	2020-07-10 06:08:12	2020-07-17 12:54:26	DE002		10.21		1.912		8.298		2.488		7.722		2.633		7.577		0.096		0.085		0.76
16	CP288	86	Prod	1106	81	2044	23	Klinikum der Universitat Munchen- Grosshadern	DE002	World	9522	Measurements	0	5855	MEASUREMENTS	Measurements	21		48564	Skin discolouration	0		195169	28	2020-07-10 06:08:12	2020-07-10 06:08:12	2020-07-17 12:54:26	DE002		18.97		1.609		17.36		3.152		15.82		4.485		14.49		0.041		0.208		2.819
16	CP288	86	Prod	1106	81	2044	23	Klinikum der Universitat Munchen- Grosshadern	DE002	World	9522	Measurements	0	5855	MEASUREMENTS	Measurements	21		48564	Skin discolouration	0		195170	29	2020-07-10 06:08:12	2020-07-10 06:08:12	2020-07-17 12:54:26	DE002		15.38		2.641		12.74		2.857		12.52		3.133		12.24		0.304		0.328		0.264
16	CP288	86	Prod	1106	81	2044	23	Klinikum der Universitat Munchen- Grosshadern	DE002	World	9522	Measurements	0	5855	MEASUREMENTS	Measurements	21		48564	Skin discolouration	0		195171	30	2020-07-10 06:08:12	2020-07-10 06:08:12	2020-07-17 12:54:26	DE002		8.16		2.15		6.019		2.537		5.631		2.641		5.527		0.053		0.572		1.11
16	CP288	86	Prod	1106	81	2044	23	Klinikum der Universitat Munchen- Grosshadern	DE002	World	9522	Measurements	0	5855	MEASUREMENTS	Measurements	21		48564	Skin discolouration	0		195172	31	2020-07-10 06:08:12	2020-07-10 06:08:12	2020-07-17 12:54:26	DE002		12.5		1.466		11.03		2.185		10.31		2.418		10.08		0.406		1.637		1.751
16	CP288	86	Prod	1106	81	2044	23	Klinikum der Universitat Munchen- Grosshadern	DE002	World	9522	Measurements	0	5855	MEASUREMENTS	Measurements	21		48564	Skin discolouration	0		195173	32	2020-07-10 06:08:12	2020-07-10 06:08:12	2020-07-17 12:54:26	DE002		20.09		1.362		18.73		2.474		17.61		2.863		17.22		0.768		2.001		2.439
16	CP288	86	Prod	1106	81	2044	23	Klinikum der Universitat Munchen- Grosshadern	DE002	World	9522	Measurements	0	5855	MEASUREMENTS	Measurements	21		48564	Skin discolouration	0		195174	33	2020-07-10 06:08:12	2020-07-10 06:08:12	2020-07-17 12:54:26	DE002		30.75		1.191		29.56		1.953		28.8		2.276		28.48		0.682		1.593		1.654
16	CP288	86	Prod	1106	81	2044	23	Klinikum der Universitat Munchen- Grosshadern	DE002	World	9522	Measurements	0	5855	MEASUREMENTS	Measurements	21		48564	Skin discolouration	0		195175	34	2020-07-10 06:08:12	2020-07-10 06:08:12	2020-07-17 12:54:26	DE002		17.12		1.318		15.8		1.907		15.21		2.132		14.99		1.533		2.381		0.595
16	CP288	86	Prod	1106	81	2044	23	Klinikum der Universitat Munchen- Grosshadern	DE002	World	9522	Measurements	0	5855	MEASUREMENTS	Measurements	21		48564	Skin discolouration	0		195176	35	2020-07-10 06:08:12	2020-07-10 06:08:12	2020-07-17 12:54:26	DE002		11.88		1.455		10.42		1.845		10.03		1.845		10.03		0.038		0.086		0.129
16	CP288	86	Prod	1106	81	2044	23	Klinikum der Universitat Munchen- Grosshadern	DE002	World	9522	Measurements	0	5855	MEASUREMENTS	Measurements	21		48564	Skin discolouration	0		195177	36	2020-07-10 06:08:12	2020-07-10 06:08:12	2020-07-17 12:54:26	DE002		16.39		0.923		15.46		1.483		14.9		2.211		14.18		0.959		0.888		1.232
16	CP288	86	Prod	1106	81	2044	23	Klinikum der Universitat Munchen- Grosshadern	DE002	World	9522	Measurements	0	5855	MEASUREMENTS	Measurements	21		48564	Skin discolouration	0		195178	37	2020-07-10 06:08:12	2020-07-10 06:08:12	2020-07-17 12:54:26	DE002		11.73		2.22		9.518		2.63		9.108		2.699		9.039		0.196		0.218		0.122
16	CP288	86	Prod	1106	81	2044	23	Klinikum der Universitat Munchen- Grosshadern	DE002	World	9522	Measurements	0	5855	MEASUREMENTS	Measurements	21		48564	Skin discolouration	0		195179	38	2020-07-10 06:08:12	2020-07-10 06:08:12	2020-07-17 12:54:26	DE002		8.61		0.273		8.34		0.276		8.336		0.276		8.336		0.062		0.236		1.436
16	CP288	86	Prod	1106	81	2044	23	Klinikum der Universitat Munchen- Grosshadern	DE002	World	9522	Measurements	0	5855	MEASUREMENTS	Measurements	21		48564	Skin discolouration	0		195180	39	2020-07-10 06:08:12	2020-07-10 06:08:12	2020-07-17 12:54:26	DE002		18.41		3.565		14.85		4.703		13.71		5.889		12.53		0.183		0.503		2.48
16	CP288	86	Prod	1106	81	2044	23	Klinikum der Universitat Munchen- Grosshadern	DE002	World	9522	Measurements	0	5855	MEASUREMENTS	Measurements	21		48564	Skin discolouration	0		195181	40	2020-07-10 06:08:12	2020-07-10 06:08:12	2020-07-17 12:54:26	DE002		10.55		3.388		7.165		4.262		6.291		4.674		5.879		0.118		0.362		1.026
16	CP288	86	Prod	1106	81	2044	23	Klinikum der Universitat Munchen- Grosshadern	DE002	World	9522	Measurements	0	5855	MEASUREMENTS	Measurements	21		48564	Skin discolouration	0		195182	41	2020-07-10 06:08:12	2020-07-10 06:08:12	2020-07-17 12:54:26	DE002		10.9		1.213		9.692		1.749		9.155		2.531		8.373		0.242		1.149		2.481
16	CP288	86	Prod	1106	81	2044	23	Klinikum der Universitat Munchen- Grosshadern	DE002	World	9522	Measurements	0	5855	MEASUREMENTS	Measurements	21		48564	Skin discolouration	0		195183	42	2020-07-10 06:08:12	2020-07-10 06:08:12	2020-07-17 12:54:26	DE002		13.49		1.839		11.65		2.443		11.04		2.462		11.03		0.004		0.062		0.456
16	CP288	86	Prod	1106	81	2044	23	Klinikum der Universitat Munchen- Grosshadern	DE002	World	9522	Measurements	0	5855	MEASUREMENTS	Measurements	21		48564	Skin discolouration	0		195184	43	2020-07-10 06:08:12	2020-07-10 06:08:12	2020-07-17 12:54:26	DE002		4.78		2.767		2.017		3.71		1.074		3.841		0.942		0.455		0.525		0.684
16	CP288	86	Prod	1106	81	2044	23	Klinikum der Universitat Munchen- Grosshadern	DE002	World	9522	Measurements	0	5855	MEASUREMENTS	Measurements	21		48564	Skin discolouration	0		195185	44	2020-07-10 06:08:12	2020-07-10 06:08:12	2020-07-17 12:54:26	DE002		6		1.078		4.929		1.369		4.638		1.524		4.483		0.229		0.172		0.382
16	CP288	86	Prod	1106	81	2044	23	Klinikum der Universitat Munchen- Grosshadern	DE002	World	9522	Measurements	0	5855	MEASUREMENTS	Measurements	21		48564	Skin discolouration	0		195186	45	2020-07-10 06:08:12	2020-07-10 06:08:12	2020-07-17 12:54:26	DE002		18.88		2.979		15.9		4.389		14.49		5.511		13.37		0.05		1.037		1.295
16	CP288	86	Prod	1106	81	2044	23	Klinikum der Universitat Munchen- Grosshadern	DE002	World	9522	Measurements	0	5855	MEASUREMENTS	Measurements	21		48564	Skin discolouration	0		195187	46	2020-07-10 06:08:12	2020-07-10 06:08:12	2020-07-17 12:54:26	DE002		11.29		1.438		9.854		1.789		9.503		1.818		9.474		0.332		0.396		0.5
16	CP288	86	Prod	1106	81	2044	23	Klinikum der Universitat Munchen- Grosshadern	DE002	World	9522	Measurements	0	5855	MEASUREMENTS	Measurements	21		48564	Skin discolouration	0		195188	47	2020-07-10 06:08:12	2020-07-10 06:08:12	2020-07-17 12:54:26	DE002		20.74		1.193		19.55		1.726		19.01		1.871		18.87		0.334		0.323		0.697
16	CP288	86	Prod	1106	81	2044	23	Klinikum der Universitat Munchen- Grosshadern	DE002	World	9522	Measurements	0	5855	MEASUREMENTS	Measurements	21		48564	Skin discolouration	0		195189	48	2020-07-10 06:08:12	2020-07-10 06:08:12	2020-07-17 12:54:26	DE002		6.76		0.725		6.042		0.784		5.983		0.784		5.983		0.01		0.151		1.073
16	CP288	86	Prod	1106	81	2044	23	Klinikum der Universitat Munchen- Grosshadern	DE002	World	9522	Measurements	0	5855	MEASUREMENTS	Measurements	21		48564	Skin discolouration	0		195190	49	2020-07-10 06:08:12	2020-07-10 06:08:12	2020-07-17 12:54:26	DE002		12.56		0.858		11.7		1.007		11.55		1.081		11.48		0.093		0.77		1.649
16	CP288	86	Prod	1106	81	2044	23	Klinikum der Universitat Munchen- Grosshadern	DE002	World	9522	Measurements	0	5855	MEASUREMENTS	Measurements	21		48564	Skin discolouration	0		195191	50	2020-07-10 06:08:12	2020-07-10 06:08:12	2020-07-17 12:54:26	DE002		12.48		1.657		10.82		2.637		9.848		3.473		9.012		0.025		0.135		0.826
16	CP288	86	Prod	1106	81	2044	23	Klinikum der Universitat Munchen- Grosshadern	DE002	World	9522	Measurements	0	5855	MEASUREMENTS	Measurements	21		48564	Skin discolouration	0		195192	51	2020-07-10 06:08:12	2020-07-10 06:08:12	2020-07-17 12:54:26	DE002		14.53		1.613		12.92		2.001		12.53		2.076		12.46		0.041		0.129		0.203
16	CP288	86	Prod	1106	81	2044	23	Klinikum der Universitat Munchen- Grosshadern	DE002	World	9522	Measurements	0	5855	MEASUREMENTS	Measurements	21		48564	Skin discolouration	0		195193	52	2020-07-10 06:08:12	2020-07-10 06:08:12	2020-07-17 12:54:26	DE002		20.89		1.523		19.36		2.321		18.57		2.792		18.1		0.03		0.235		0.48
16	CP288	86	Prod	1106	81	2044	23	Klinikum der Universitat Munchen- Grosshadern	DE002	World	9522	Measurements	0	5855	MEASUREMENTS	Measurements	21		48564	Skin discolouration	0		195194	53	2020-07-10 06:08:12	2020-07-10 06:08:12	2020-07-17 12:54:26	DE002		17.11		3.326		13.78		4.256		12.85		4.598		12.51		0.338		2.78		3.094
16	CP288	86	Prod	1106	81	2044	23	Klinikum der Universitat Munchen- Grosshadern	DE002	World	9522	Measurements	0	5855	MEASUREMENTS	Measurements	21		48564	Skin discolouration	0		195195	54	2020-07-10 06:08:12	2020-07-10 06:08:12	2020-07-17 12:54:26	DE002		9.4		2.496		6.906		2.721		6.681		2.916		6.486		0.928		2.207		2.775
16	CP288	86	Prod	1106	81	2044	23	Klinikum der Universitat Munchen- Grosshadern	DE002	World	9522	Measurements	0	5855	MEASUREMENTS	Measurements	21		48564	Skin discolouration	0		195196	55	2020-07-10 06:08:12	2020-07-10 06:08:12	2020-07-17 12:54:26	DE002		13.58		2.857		10.72		4.718		8.867		5.923		7.662		0.403		0.302		0.857
16	CP288	86	Prod	1107	81	2045	23	Klinikum der Universitat Munchen- Grosshadern	DE002	World	9553	Measurements	0	5855	MEASUREMENTS	Measurements	21		48624	Skin discolouration	0		132188	1	2020-07-10 06:08:17	2020-07-10 06:08:17	2020-07-17 12:54:26	DE002		31.32		4.848		26.48		8.991		22.33		12.93		18.39		0		0.012		0.07
16	CP288	86	Prod	1107	81	2045	23	Klinikum der Universitat Munchen- Grosshadern	DE002	World	9553	Measurements	0	5855	MEASUREMENTS	Measurements	21		48624	Skin discolouration	0		195335	2	2020-07-10 06:08:17	2020-07-10 06:08:17	2020-07-17 12:54:26	DE002		41.14		2.462		38.68		5.442		35.7		9.613		31.53		0.059		0.206		0.485
16	CP288	86	Prod	1107	81	2045	23	Klinikum der Universitat Munchen- Grosshadern	DE002	World	9553	Measurements	0	5855	MEASUREMENTS	Measurements	21		48624	Skin discolouration	0		195336	3	2020-07-10 06:08:17	2020-07-10 06:08:17	2020-07-17 12:54:26	DE002		30.61		5.063		25.54		9.753		20.85		15		15.6		0		0		0
16	CP288	86	Prod	1107	81	2045	23	Klinikum der Universitat Munchen- Grosshadern	DE002	World	9553	Measurements	0	5855	MEASUREMENTS	Measurements	21		48624	Skin discolouration	0		195337	4	2020-07-10 06:08:17	2020-07-10 06:08:17	2020-07-17 12:54:26	DE002		32.98		1.844		31.14		4.325		28.66		7.213		25.77		0.033		0.083		0.695
16	CP288	86	Prod	1107	81	2045	23	Klinikum der Universitat Munchen- Grosshadern	DE002	World	9553	Measurements	0	5855	MEASUREMENTS	Measurements	21		48624	Skin discolouration	0		195338	5	2020-07-10 06:08:17	2020-07-10 06:08:17	2020-07-17 12:54:26	DE002		36.32		13.11		23.21		14.59		21.73		17.96		18.36		0.001		0.002		0.011
16	CP288	86	Prod	1107	81	2045	23	Klinikum der Universitat Munchen- Grosshadern	DE002	World	9553	Measurements	0	5855	MEASUREMENTS	Measurements	21		48624	Skin discolouration	0		195339	6	2020-07-10 06:08:17	2020-07-10 06:08:17	2020-07-17 12:54:26	DE002		27.4		4.245		23.15		9.959		17.44		15.72		11.67		0.015		0.102		0.269
16	CP288	86	Prod	1107	81	2045	23	Klinikum der Universitat Munchen- Grosshadern	DE002	World	9553	Measurements	0	5855	MEASUREMENTS	Measurements	21		48624	Skin discolouration	0		195340	7	2020-07-10 06:08:17	2020-07-10 06:08:17	2020-07-17 12:54:26	DE002		23.8		6.797		17		11.43		12.37		15.33		8.467		0		0		0
16	CP288	86	Prod	1107	81	2045	23	Klinikum der Universitat Munchen- Grosshadern	DE002	World	9553	Measurements	0	5855	MEASUREMENTS	Measurements	21		48624	Skin discolouration	0		195341	8	2020-07-10 06:08:17	2020-07-10 06:08:17	2020-07-17 12:54:26	DE002		30.84		12.41		18.42		15.79		15.05		18.21		12.62		0.001		0.005		0.03
16	CP288	86	Prod	1107	81	2045	23	Klinikum der Universitat Munchen- Grosshadern	DE002	World	9553	Measurements	0	5855	MEASUREMENTS	Measurements	21		48624	Skin discolouration	0		195342	9	2020-07-10 06:08:17	2020-07-10 06:08:17	2020-07-17 12:54:26	DE002		42.54		5.316		37.22		10		32.53		15.2		27.33		0		0		0.006
16	CP288	86	Prod	1107	81	2045	23	Klinikum der Universitat Munchen- Grosshadern	DE002	World	9553	Measurements	0	5855	MEASUREMENTS	Measurements	21		48624	Skin discolouration	0		195343	10	2020-07-10 06:08:17	2020-07-10 06:08:17	2020-07-17 12:54:26	DE002		30.03		3.813		26.22		7.075		22.95		11.07		18.96		0.015		0.042		0.16
16	CP288	86	Prod	1107	81	2045	23	Klinikum der Universitat Munchen- Grosshadern	DE002	World	9553	Measurements	0	5855	MEASUREMENTS	Measurements	21		48624	Skin discolouration	0		195344	11	2020-07-10 06:08:17	2020-07-10 06:08:17	2020-07-17 12:54:26	DE002		24.94		10.71		14.23		14.3		10.64		17.33		7.613		0		0		0.002
16	CP288	86	Prod	1107	81	2045	23	Klinikum der Universitat Munchen- Grosshadern	DE002	World	9553	Measurements	0	5855	MEASUREMENTS	Measurements	21		48624	Skin discolouration	0		195345	12	2020-07-10 06:08:17	2020-07-10 06:08:17	2020-07-17 12:54:26	DE002		35.05		6.064		28.98		10.31		24.73		14.58		20.47		0		0		0
16	CP288	86	Prod	1107	81	2045	23	Klinikum der Universitat Munchen- Grosshadern	DE002	World	9553	Measurements	0	5855	MEASUREMENTS	Measurements	21		48624	Skin discolouration	0		195346	13	2020-07-10 06:08:17	2020-07-10 06:08:17	2020-07-17 12:54:26	DE002		13.57		2.02		11.55		3.653		9.921		5.193		8.381		0		0.001		0.003
16	CP288	86	Prod	1107	81	2045	23	Klinikum der Universitat Munchen- Grosshadern	DE002	World	9553	Measurements	0	5855	MEASUREMENTS	Measurements	21		48624	Skin discolouration	0		195347	14	2020-07-10 06:08:17	2020-07-10 06:08:17	2020-07-17 12:54:26	DE002		36.15		3.368		32.78		6.659		29.49		10.31		25.84		0.089		0.128		0.529
16	CP288	86	Prod	1107	81	2045	23	Klinikum der Universitat Munchen- Grosshadern	DE002	World	9553	Measurements	0	5855	MEASUREMENTS	Measurements	21		48624	Skin discolouration	0		195348	15	2020-07-10 06:08:17	2020-07-10 06:08:17	2020-07-17 12:54:26	DE002		22.69		2.719		19.97		5.146		17.55		8.293		14.4		0		0		0.006
16	CP288	86	Prod	1107	81	2045	23	Klinikum der Universitat Munchen- Grosshadern	DE002	World	9553	Measurements	0	5855	MEASUREMENTS	Measurements	21		48624	Skin discolouration	0		195349	16	2020-07-10 06:08:17	2020-07-10 06:08:17	2020-07-17 12:54:26	DE002		18.54		6.571		11.97		9.492		9.049		12.03		6.509		0.014		0.015		0.008
16	CP288	86	Prod	1107	81	2045	23	Klinikum der Universitat Munchen- Grosshadern	DE002	World	9553	Measurements	0	5855	MEASUREMENTS	Measurements	21		48624	Skin discolouration	0		195350	17	2020-07-10 06:08:17	2020-07-10 06:08:17	2020-07-17 12:54:26	DE002		28.03		3.153		24.88		7.341		20.69		13.77		14.26		0		0.011		0.042
16	CP288	86	Prod	1107	81	2045	23	Klinikum der Universitat Munchen- Grosshadern	DE002	World	9553	Measurements	0	5855	MEASUREMENTS	Measurements	21		48624	Skin discolouration	0		195351	18	2020-07-10 06:08:17	2020-07-10 06:08:17	2020-07-17 12:54:26	DE002		28.25		11.01		17.24		1.005		27.25		0.824		27.43		0		0.006		0.022
16	CP288	86	Prod	1107	81	2045	23	Klinikum der Universitat Munchen- Grosshadern	DE002	World	9553	Measurements	0	5855	MEASUREMENTS	Measurements	21		48624	Skin discolouration	0		195352	19	2020-07-10 06:08:17	2020-07-10 06:08:17	2020-07-17 12:54:26	DE002		30.32		3.846		26.47		7.576		22.74		11.96		18.35		0.009		0.03		0.09
16	CP288	86	Prod	1107	81	2045	23	Klinikum der Universitat Munchen- Grosshadern	DE002	World	9553	Measurements	0	5855	MEASUREMENTS	Measurements	21		48624	Skin discolouration	0		195353	20	2020-07-10 06:08:17	2020-07-10 06:08:17	2020-07-17 12:54:26	DE002		41.74		4.125		37.62		9.63		32.11		17.18		24.56		0.024		0.104		0.901
16	CP288	86	Prod	1107	81	2045	23	Klinikum der Universitat Munchen- Grosshadern	DE002	World	9553	Measurements	0	5855	MEASUREMENTS	Measurements	21		48624	Skin discolouration	0		195354	21	2020-07-10 06:08:17	2020-07-10 06:08:17	2020-07-17 12:54:26	DE002		19.95		1.671		18.27		3.639		16.31		6.439		13.51		0		0		0.003
16	CP288	86	Prod	1107	81	2045	23	Klinikum der Universitat Munchen- Grosshadern	DE002	World	9553	Measurements	0	5855	MEASUREMENTS	Measurements	21		48624	Skin discolouration	0		195355	22	2020-07-10 06:08:17	2020-07-10 06:08:17	2020-07-17 12:54:26	DE002		36.2		4.362		31.84		9.194		27.01		14.42		21.78		0		0		0
16	CP288	86	Prod	1107	81	2045	23	Klinikum der Universitat Munchen- Grosshadern	DE002	World	9553	Measurements	0	5855	MEASUREMENTS	Measurements	21		48624	Skin discolouration	0		195356	23	2020-07-10 06:08:17	2020-07-10 06:08:17	2020-07-17 12:54:26	DE002		39.17		5.508		33.66		9.206		29.96		13.77		25.39		0		0		0
16	CP288	86	Prod	1107	81	2045	23	Klinikum der Universitat Munchen- Grosshadern	DE002	World	9553	Measurements	0	5855	MEASUREMENTS	Measurements	21		48624	Skin discolouration	0		195357	24	2020-07-10 06:08:17	2020-07-10 06:08:17	2020-07-17 12:54:26	DE002		33.42		3.318		30.1		7.395		26.02		12.77		20.64		0		0		0
16	CP288	86	Prod	1107	81	2045	23	Klinikum der Universitat Munchen- Grosshadern	DE002	World	9553	Measurements	0	5855	MEASUREMENTS	Measurements	21		48624	Skin discolouration	0		195358	25	2020-07-10 06:08:17	2020-07-10 06:08:17	2020-07-17 12:54:26	DE002		32.84		2.931		29.91		6.593		26.25		12.21		20.63		0.001		0.035		0.266
16	CP288	86	Prod	1107	81	2045	23	Klinikum der Universitat Munchen- Grosshadern	DE002	World	9553	Measurements	0	5855	MEASUREMENTS	Measurements	21		48624	Skin discolouration	0		195359	26	2020-07-10 06:08:17	2020-07-10 06:08:17	2020-07-17 12:54:26	DE002		20.45		1.564		18.89		2.973		17.48		4.543		15.91		0.001		0		0.001
16	CP288	86	Prod	1107	81	2045	23	Klinikum der Universitat Munchen- Grosshadern	DE002	World	9553	Measurements	0	5855	MEASUREMENTS	Measurements	21		48624	Skin discolouration	0		195360	27	2020-07-10 06:08:17	2020-07-10 06:08:17	2020-07-17 12:54:26	DE002		31.43		4.672		26.76		8.354		23.08		14.37		17.06		0.013		0.044		0.138
16	CP288	86	Prod	1107	81	2045	23	Klinikum der Universitat Munchen- Grosshadern	DE002	World	9553	Measurements	0	5855	MEASUREMENTS	Measurements	21		48624	Skin discolouration	0		195361	28	2020-07-10 06:08:17	2020-07-10 06:08:17	2020-07-17 12:54:26	DE002		32.15		0.18		31.97		0		32.15		0		32.15		0.039		0.041		0.963
16	CP288	86	Prod	1107	81	2045	23	Klinikum der Universitat Munchen- Grosshadern	DE002	World	9553	Measurements	0	5855	MEASUREMENTS	Measurements	21		48624	Skin discolouration	0		195362	29	2020-07-10 06:08:17	2020-07-10 06:08:17	2020-07-17 12:54:26	DE002		47.73		10.91		36.82		18.82		28.91		26.54		21.19		0.003		0.026		0.205
16	CP288	86	Prod	1107	81	2045	23	Klinikum der Universitat Munchen- Grosshadern	DE002	World	9553	Measurements	0	5855	MEASUREMENTS	Measurements	21		48624	Skin discolouration	0		195363	30	2020-07-10 06:08:17	2020-07-10 06:08:17	2020-07-17 12:54:26	DE002		31.37		3.059		28.31		4.664		26.7		6.014		25.35		0		0		0.011
16	CP288	86	Prod	1107	81	2045	23	Klinikum der Universitat Munchen- Grosshadern	DE002	World	9553	Measurements	0	5855	MEASUREMENTS	Measurements	21		48624	Skin discolouration	0		195364	31	2020-07-10 06:08:17	2020-07-10 06:08:17	2020-07-17 12:54:26	DE002		60.94		10.23		50.71		1.094		59.85		0.956		59.99		0		0		0.001
16	CP288	86	Prod	1107	81	2045	23	Klinikum der Universitat Munchen- Grosshadern	DE002	World	9553	Measurements	0	5855	MEASUREMENTS	Measurements	21		48624	Skin discolouration	0		195365	32	2020-07-10 06:08:17	2020-07-10 06:08:17	2020-07-17 12:54:26	DE002		18.16		2.235		15.92		4.609		13.55		8.379		9.785		0.029		0.041		0.104
16	CP288	86	Prod	1107	81	2045	23	Klinikum der Universitat Munchen- Grosshadern	DE002	World	9553	Measurements	0	5855	MEASUREMENTS	Measurements	21		48624	Skin discolouration	0		195366	33	2020-07-10 06:08:17	2020-07-10 06:08:17	2020-07-17 12:54:26	DE002		10.11		2.241		7.873		3.401		6.712		4.376		5.737		0		0		0.002
16	CP288	86	Prod	1107	81	2045	23	Klinikum der Universitat Munchen- Grosshadern	DE002	World	9553	Measurements	0	5855	MEASUREMENTS	Measurements	21		48624	Skin discolouration	0		195367	34	2020-07-10 06:08:17	2020-07-10 06:08:17	2020-07-17 12:54:26	DE002		52.59		5.478		47.12		11.68		40.91		19.13		33.47		0.04		0.148		0.707
16	CP288	86	Prod	1107	81	2045	23	Klinikum der Universitat Munchen- Grosshadern	DE002	World	9553	Measurements	0	5855	MEASUREMENTS	Measurements	21		48624	Skin discolouration	0		195368	35	2020-07-10 06:08:17	2020-07-10 06:08:17	2020-07-17 12:54:26	DE002		0.6		0.002		0.604		0		0.606		0		0.606		0		0		0
16	CP288	86	Prod	1107	81	2045	23	Klinikum der Universitat Munchen- Grosshadern	DE002	World	9553	Measurements	0	5855	MEASUREMENTS	Measurements	21		48624	Skin discolouration	0		195369	36	2020-07-10 06:08:17	2020-07-10 06:08:17	2020-07-17 12:54:26	DE002		27.18		3.318		23.86		6.196		20.99		10.17		17.01		0.001		0.001		0.031
16	CP288	86	Prod	1107	81	2045	23	Klinikum der Universitat Munchen- Grosshadern	DE002	World	9553	Measurements	0	5855	MEASUREMENTS	Measurements	21		48624	Skin discolouration	0		195370	37	2020-07-10 06:08:17	2020-07-10 06:08:17	2020-07-17 12:54:26	DE002		26.62		2.913		23.71		4.492		22.13		5.274		21.35		0.008		0.019		0.079
16	CP288	86	Prod	1107	81	2045	23	Klinikum der Universitat Munchen- Grosshadern	DE002	World	9553	Measurements	0	5855	MEASUREMENTS	Measurements	21		48624	Skin discolouration	0		195371	38	2020-07-10 06:08:17	2020-07-10 06:08:17	2020-07-17 12:54:26	DE002		23.51		12.74		10.77		16.5		7.018		18.86		4.65		0		0		0
16	CP288	86	Prod	1107	81	2045	23	Klinikum der Universitat Munchen- Grosshadern	DE002	World	9553	Measurements	0	5855	MEASUREMENTS	Measurements	21		48624	Skin discolouration	0		195372	39	2020-07-10 06:08:17	2020-07-10 06:08:17	2020-07-17 12:54:26	DE002		38.66		4.689		33.97		9.859		28.8		16.44		22.21		0.013		0.052		0.184
16	CP288	86	Prod	1107	81	2045	23	Klinikum der Universitat Munchen- Grosshadern	DE002	World	9553	Measurements	0	5855	MEASUREMENTS	Measurements	21		48624	Skin discolouration	0		195373	40	2020-07-10 06:08:17	2020-07-10 06:08:17	2020-07-17 12:54:26	DE002		27.25		2.254		25		4.598		22.66		7.928		19.33		0		0.013		0.044
16	CP288	86	Prod	1107	81	2045	23	Klinikum der Universitat Munchen- Grosshadern	DE002	World	9553	Measurements	0	5855	MEASUREMENTS	Measurements	21		48624	Skin discolouration	0		195374	41	2020-07-10 06:08:17	2020-07-10 06:08:17	2020-07-17 12:54:26	DE002		39.63		12.88		26.74		20.75		18.87		26.9		12.73		0		0.005		0.029
16	CP288	86	Prod	1107	81	2045	23	Klinikum der Universitat Munchen- Grosshadern	DE002	World	9553	Measurements	0	5855	MEASUREMENTS	Measurements	21		48624	Skin discolouration	0		195375	42	2020-07-10 06:08:17	2020-07-10 06:08:17	2020-07-17 12:54:26	DE002		20.6		3.503		17.1		5.937		14.67		8.656		11.95		0.001		0.007		0.092
16	CP288	86	Prod	1107	81	2045	23	Klinikum der Universitat Munchen- Grosshadern	DE002	World	9553	Measurements	0	5855	MEASUREMENTS	Measurements	21		48624	Skin discolouration	0		195376	43	2020-07-10 06:08:17	2020-07-10 06:08:17	2020-07-17 12:54:26	DE002		24.47		1.902		22.57		4.68		19.79		7.899		16.57		0.027		0.05		0.559
16	CP288	86	Prod	1107	81	2045	23	Klinikum der Universitat Munchen- Grosshadern	DE002	World	9553	Measurements	0	5855	MEASUREMENTS	Measurements	21		48624	Skin discolouration	0		195377	44	2020-07-10 06:08:17	2020-07-10 06:08:17	2020-07-17 12:54:26	DE002		58.61		12.03		46.57		19.34		39.27		0.885		57.72		0.059		0.175		0.527
16	CP288	86	Prod	1107	81	2045	23	Klinikum der Universitat Munchen- Grosshadern	DE002	World	9553	Measurements	0	5855	MEASUREMENTS	Measurements	21		48624	Skin discolouration	0		195378	45	2020-07-10 06:08:17	2020-07-10 06:08:17	2020-07-17 12:54:26	DE002		38.13		4.987		33.15		11.48		26.65		18.98		19.15		0.004		0.031		0.09
16	CP288	86	Prod	1107	81	2045	23	Klinikum der Universitat Munchen- Grosshadern	DE002	World	9553	Measurements	0	5855	MEASUREMENTS	Measurements	21		48624	Skin discolouration	0		195379	46	2020-07-10 06:08:17	2020-07-10 06:08:17	2020-07-17 12:54:26	DE002		57.16		13.42		43.73		20.89		36.26		30		27.16		0.306		0.329		0.511
16	CP288	86	Prod	1107	81	2045	23	Klinikum der Universitat Munchen- Grosshadern	DE002	World	9553	Measurements	0	5855	MEASUREMENTS	Measurements	21		48624	Skin discolouration	0		195380	47	2020-07-10 06:08:17	2020-07-10 06:08:17	2020-07-17 12:54:26	DE002		23.27		3.309		19.96		6.571		16.7		10.27		13		0.007		0.027		0.096
16	CP288	86	Prod	1107	81	2045	23	Klinikum der Universitat Munchen- Grosshadern	DE002	World	9553	Measurements	0	5855	MEASUREMENTS	Measurements	21		48624	Skin discolouration	0		195381	48	2020-07-10 06:08:17	2020-07-10 06:08:17	2020-07-17 12:54:26	DE002		24.17		3.302		20.86		6.767		17.4		12.05		12.11		0		0		0.001
16	CP288	86	Prod	1107	81	2045	23	Klinikum der Universitat Munchen- Grosshadern	DE002	World	9553	Measurements	0	5855	MEASUREMENTS	Measurements	21		48624	Skin discolouration	0		195382	49	2020-07-10 06:08:17	2020-07-10 06:08:17	2020-07-17 12:54:26	DE002		11.26		3.756		7.51		6.259		5.007		8.875		2.391		0		0		0
16	CP288	86	Prod	1107	81	2045	23	Klinikum der Universitat Munchen- Grosshadern	DE002	World	9553	Measurements	0	5855	MEASUREMENTS	Measurements	21		48624	Skin discolouration	0		195383	50	2020-07-10 06:08:17	2020-07-10 06:08:17	2020-07-17 12:54:26	DE002		19.59		1.765		17.83		3.756		15.84		5.895		13.7		0		0.002		0.051
16	CP288	86	Prod	1107	81	2045	23	Klinikum der Universitat Munchen- Grosshadern	DE002	World	9553	Measurements	0	5855	MEASUREMENTS	Measurements	21		48624	Skin discolouration	0		195384	51	2020-07-10 06:08:17	2020-07-10 06:08:17	2020-07-17 12:54:26	DE002		35.31		4.711		30.6		8.624		26.69		12.33		22.98		0		0.001		0.217
16	CP288	86	Prod	1107	81	2045	23	Klinikum der Universitat Munchen- Grosshadern	DE002	World	9553	Measurements	0	5855	MEASUREMENTS	Measurements	21		48624	Skin discolouration	0		195385	52	2020-07-10 06:08:17	2020-07-10 06:08:17	2020-07-17 12:54:26	DE002		25.32		8.359		16.96		10.29		15.02		11.7		13.62		0		0		0
16	CP288	86	Prod	1107	81	2045	23	Klinikum der Universitat Munchen- Grosshadern	DE002	World	9553	Measurements	0	5855	MEASUREMENTS	Measurements	21		48624	Skin discolouration	0		195386	53	2020-07-10 06:08:17	2020-07-10 06:08:17	2020-07-17 12:54:26	DE002		37.5		6.405		31.09		12.78		24.71		18.3		19.19		0		0		0
16	CP288	86	Prod	1107	81	2045	23	Klinikum der Universitat Munchen- Grosshadern	DE002	World	9553	Measurements	0	5855	MEASUREMENTS	Measurements	21		48624	Skin discolouration	0		195387	54	2020-07-10 06:08:17	2020-07-10 06:08:17	2020-07-17 12:54:26	DE002		29.59		3.5		26.09		7.237		22.36		11.8		17.79		0.009		0.011		0.06
16	CP288	86	Prod	1107	81	2045	23	Klinikum der Universitat Munchen- Grosshadern	DE002	World	9553	Measurements	0	5855	MEASUREMENTS	Measurements	21		48624	Skin discolouration	0		195388	55	2020-07-10 06:08:17	2020-07-10 06:08:17	2020-07-17 12:54:26	DE002		27.44		3.714		23.73		7.395		20.05		12.19		15.25		0		0.015		0.022
16	CP288	86	Prod	1107	81	2045	23	Klinikum der Universitat Munchen- Grosshadern	DE002	World	9553	Measurements	0	5855	MEASUREMENTS	Measurements	21		48624	Skin discolouration	0		195389	56	2020-07-10 06:08:17	2020-07-10 06:08:17	2020-07-17 12:54:26	DE002		11.89		2.543		9.356		4.57		7.329		7.101		4.797		0		0		0
16	CP288	86	Prod	1107	81	2045	23	Klinikum der Universitat Munchen- Grosshadern	DE002	World	9553	Measurements	0	5855	MEASUREMENTS	Measurements	21		48624	Skin discolouration	0		195390	57	2020-07-10 06:08:17	2020-07-10 06:08:17	2020-07-17 12:54:26	DE002		47.16		13.29		33.87		17.66		29.49		22.19		24.97		0.112		0.16		0.349
16	CP288	86	Prod	1107	81	2045	23	Klinikum der Universitat Munchen- Grosshadern	DE002	World	9553	Measurements	0	5855	MEASUREMENTS	Measurements	21		48624	Skin discolouration	0		195391	58	2020-07-10 06:08:17	2020-07-10 06:08:17	2020-07-17 12:54:26	DE002		52.71		4.849		47.87		10.5		42.21		16.97		35.74		0.025		0.119		0.287
16	CP288	86	Prod	1108	81	2046	23	Klinikum der Universitat Munchen- Grosshadern	DE002	World	9584	Measurements	0	5855	MEASUREMENTS	Measurements	21		48684	Skin discolouration	0		132268	1	2020-07-10 06:08:16	2020-07-10 06:08:16	2020-07-17 12:54:26	DE002		11.06		5.777		5.283		8.717		2.344		10.45		0.605		0.377		0.468		0.681
16	CP288	86	Prod	1108	81	2046	23	Klinikum der Universitat Munchen- Grosshadern	DE002	World	9584	Measurements	0	5855	MEASUREMENTS	Measurements	21		48684	Skin discolouration	0		195298	2	2020-07-10 06:08:16	2020-07-10 06:08:16	2020-07-17 12:54:26	DE002		31.51		9.212		22.3		16.5		15		22.55		8.955		0.164		0.278		0.617
16	CP288	86	Prod	1108	81	2046	23	Klinikum der Universitat Munchen- Grosshadern	DE002	World	9584	Measurements	0	5855	MEASUREMENTS	Measurements	21		48684	Skin discolouration	0		195299	3	2020-07-10 06:08:16	2020-07-10 06:08:16	2020-07-17 12:54:26	DE002		41		8.559		32.45		15.36		25.63		22.19		18.81		0.375		0.573		1.34
16	CP288	86	Prod	1108	81	2046	23	Klinikum der Universitat Munchen- Grosshadern	DE002	World	9584	Measurements	0	5855	MEASUREMENTS	Measurements	21		48684	Skin discolouration	0		195300	4	2020-07-10 06:08:16	2020-07-10 06:08:16	2020-07-17 12:54:26	DE002		44.99		19.88		25.11		30.29		14.7		37.95		7.041		0.032		0.078		0.172
16	CP288	86	Prod	1108	81	2046	23	Klinikum der Universitat Munchen- Grosshadern	DE002	World	9584	Measurements	0	5855	MEASUREMENTS	Measurements	21		48684	Skin discolouration	0		195301	5	2020-07-10 06:08:16	2020-07-10 06:08:16	2020-07-17 12:54:26	DE002		11.81		8.883		2.928		10.69		1.115		11.43		0.376		0.395		0.29		0.407
16	CP288	86	Prod	1108	81	2046	23	Klinikum der Universitat Munchen- Grosshadern	DE002	World	9584	Measurements	0	5855	MEASUREMENTS	Measurements	21		48684	Skin discolouration	0		195302	6	2020-07-10 06:08:16	2020-07-10 06:08:16	2020-07-17 12:54:26	DE002		23.97		8.604		15.37		13.68		10.29		18.22		5.753		0.545		0.9		1.406
16	CP288	86	Prod	1108	81	2046	23	Klinikum der Universitat Munchen- Grosshadern	DE002	World	9584	Measurements	0	5855	MEASUREMENTS	Measurements	21		48684	Skin discolouration	0		195303	7	2020-07-10 06:08:16	2020-07-10 06:08:16	2020-07-17 12:54:26	DE002		37.43		11.6		25.83		20.81		16.61		29.36		8.073		0.033		0.106		0.263
16	CP288	86	Prod	1108	81	2046	23	Klinikum der Universitat Munchen- Grosshadern	DE002	World	9584	Measurements	0	5855	MEASUREMENTS	Measurements	21		48684	Skin discolouration	0		195304	8	2020-07-10 06:08:16	2020-07-10 06:08:16	2020-07-17 12:54:26	DE002		39.36		14.84		24.52		23.03		16.33		28.46		10.9		0.138		0.273		1.063
16	CP288	86	Prod	1108	81	2046	23	Klinikum der Universitat Munchen- Grosshadern	DE002	World	9584	Measurements	0	5855	MEASUREMENTS	Measurements	21		48684	Skin discolouration	0		195305	9	2020-07-10 06:08:16	2020-07-10 06:08:16	2020-07-17 12:54:26	DE002		38.34		10.15		28.19		18.95		19.39		27.96		10.38		0.048		0.056		0.11
16	CP288	86	Prod	1108	81	2046	23	Klinikum der Universitat Munchen- Grosshadern	DE002	World	9584	Measurements	0	5855	MEASUREMENTS	Measurements	21		48684	Skin discolouration	0		195306	10	2020-07-10 06:08:16	2020-07-10 06:08:16	2020-07-17 12:54:26	DE002		43.79		12.8		30.99		22.72		21.07		31.45		12.34		0.004		0.008		0.022
16	CP288	86	Prod	1108	81	2046	23	Klinikum der Universitat Munchen- Grosshadern	DE002	World	9584	Measurements	0	5855	MEASUREMENTS	Measurements	21		48684	Skin discolouration	0		195307	11	2020-07-10 06:08:16	2020-07-10 06:08:16	2020-07-17 12:54:26	DE002		22.94		8.853		14.08		15.43		7.503		19.69		3.251		0.021		0.065		0.167
16	CP288	86	Prod	1108	81	2046	23	Klinikum der Universitat Munchen- Grosshadern	DE002	World	9584	Measurements	0	5855	MEASUREMENTS	Measurements	21		48684	Skin discolouration	0		195308	12	2020-07-10 06:08:16	2020-07-10 06:08:16	2020-07-17 12:54:26	DE002		10.07		4.337		5.737		6.494		3.58		7.888		2.185		0.177		0.241		0.542
16	CP288	86	Prod	1108	81	2046	23	Klinikum der Universitat Munchen- Grosshadern	DE002	World	9584	Measurements	0	5855	MEASUREMENTS	Measurements	21		48684	Skin discolouration	0		195309	13	2020-07-10 06:08:16	2020-07-10 06:08:16	2020-07-17 12:54:26	DE002		28.96		10.41		18.55		16.69		12.27		22.46		6.497		0.118		0.166		0.198
16	CP288	86	Prod	1108	81	2046	23	Klinikum der Universitat Munchen- Grosshadern	DE002	World	9584	Measurements	0	5855	MEASUREMENTS	Measurements	21		48684	Skin discolouration	0		195310	14	2020-07-10 06:08:16	2020-07-10 06:08:16	2020-07-17 12:54:26	DE002		11.67		6.177		5.502		9.47		2.209		11.07		0.608		0.338		0.481		0.64
16	CP288	86	Prod	1108	81	2046	23	Klinikum der Universitat Munchen- Grosshadern	DE002	World	9584	Measurements	0	5855	MEASUREMENTS	Measurements	21		48684	Skin discolouration	0		195311	15	2020-07-10 06:08:16	2020-07-10 06:08:16	2020-07-17 12:54:26	DE002		30.47		8.864		21.61		14.15		16.32		18.11		12.35		0.131		0.395		1.421
16	CP288	86	Prod	1108	81	2046	23	Klinikum der Universitat Munchen- Grosshadern	DE002	World	9584	Measurements	0	5855	MEASUREMENTS	Measurements	21		48684	Skin discolouration	0		195312	16	2020-07-10 06:08:16	2020-07-10 06:08:16	2020-07-17 12:54:26	DE002		12.92		5.778		7.152		10.28		2.647		12.75		0.179		0.036		0.043		0.116
16	CP288	86	Prod	1108	81	2046	23	Klinikum der Universitat Munchen- Grosshadern	DE002	World	9584	Measurements	0	5855	MEASUREMENTS	Measurements	21		48684	Skin discolouration	0		195313	17	2020-07-10 06:08:16	2020-07-10 06:08:16	2020-07-17 12:54:26	DE002		30.52		8.843		21.67		15.42		15.09		22.6		7.917		0		0.001		0.021
16	CP288	86	Prod	1108	81	2046	23	Klinikum der Universitat Munchen- Grosshadern	DE002	World	9584	Measurements	0	5855	MEASUREMENTS	Measurements	21		48684	Skin discolouration	0		195314	18	2020-07-10 06:08:16	2020-07-10 06:08:16	2020-07-17 12:54:26	DE002		32.31		8.86		23.45		15.05		17.26		22.88		9.433		0.659		0.864		1.611
16	CP288	86	Prod	1108	81	2046	23	Klinikum der Universitat Munchen- Grosshadern	DE002	World	9584	Measurements	0	5855	MEASUREMENTS	Measurements	21		48684	Skin discolouration	0		195315	19	2020-07-10 06:08:16	2020-07-10 06:08:16	2020-07-17 12:54:26	DE002		39.05		8.894		30.15		15.54		23.5		22.64		16.4		0.677		1.307		2.484
16	CP288	86	Prod	1108	81	2046	23	Klinikum der Universitat Munchen- Grosshadern	DE002	World	9584	Measurements	0	5855	MEASUREMENTS	Measurements	21		48684	Skin discolouration	0		195316	20	2020-07-10 06:08:16	2020-07-10 06:08:16	2020-07-17 12:54:26	DE002		6.65		3.404		3.255		5.1		1.559		6.263		0.396		0.521		0.416		0.491
16	CP288	86	Prod	1108	81	2046	23	Klinikum der Universitat Munchen- Grosshadern	DE002	World	9584	Measurements	0	5855	MEASUREMENTS	Measurements	21		48684	Skin discolouration	0		195317	21	2020-07-10 06:08:16	2020-07-10 06:08:16	2020-07-17 12:54:26	DE002		21.21		8.549		12.66		14.52		6.69		18.25		2.962		0.069		0.178		0.417
16	CP288	86	Prod	1108	81	2046	23	Klinikum der Universitat Munchen- Grosshadern	DE002	World	9584	Measurements	0	5855	MEASUREMENTS	Measurements	21		48684	Skin discolouration	0		195318	22	2020-07-10 06:08:16	2020-07-10 06:08:16	2020-07-17 12:54:26	DE002		22.95		8.532		14.42		14.82		8.134		20.55		2.399		0.041		0.14		0.458
16	CP288	86	Prod	1108	81	2046	23	Klinikum der Universitat Munchen- Grosshadern	DE002	World	9584	Measurements	0	5855	MEASUREMENTS	Measurements	21		48684	Skin discolouration	0		195319	23	2020-07-10 06:08:16	2020-07-10 06:08:16	2020-07-17 12:54:26	DE002		9.19		4.003		5.195		6.119		3.079		7.573		1.626		0.084		0.133		0.359
16	CP288	86	Prod	1108	81	2046	23	Klinikum der Universitat Munchen- Grosshadern	DE002	World	9584	Measurements	0	5855	MEASUREMENTS	Measurements	21		48684	Skin discolouration	0		195320	24	2020-07-10 06:08:16	2020-07-10 06:08:16	2020-07-17 12:54:26	DE002		27.39		8.546		18.84		13.56		13.83		18.87		8.524		0.008		0.028		0.08
16	CP288	86	Prod	1108	81	2046	23	Klinikum der Universitat Munchen- Grosshadern	DE002	World	9584	Measurements	0	5855	MEASUREMENTS	Measurements	21		48684	Skin discolouration	0		195321	25	2020-07-10 06:08:16	2020-07-10 06:08:16	2020-07-17 12:54:26	DE002		25.47		7.736		17.74		13.82		11.64		20.19		5.28		0.084		0.257		0.487
16	CP288	86	Prod	1108	81	2046	23	Klinikum der Universitat Munchen- Grosshadern	DE002	World	9584	Measurements	0	5855	MEASUREMENTS	Measurements	21		48684	Skin discolouration	0		195322	26	2020-07-10 06:08:16	2020-07-10 06:08:16	2020-07-17 12:54:26	DE002		41.69		7.958		33.73		13.97		27.72		21.51		20.18		0.201		1.514		3.948
16	CP288	86	Prod	1108	81	2046	23	Klinikum der Universitat Munchen- Grosshadern	DE002	World	9584	Measurements	0	5855	MEASUREMENTS	Measurements	21		48684	Skin discolouration	0		195323	27	2020-07-10 06:08:16	2020-07-10 06:08:16	2020-07-17 12:54:26	DE002		18.28		7.617		10.66		12.55		5.729		17.13		1.145		0.269		0.423		0.552
16	CP288	86	Prod	1108	81	2046	23	Klinikum der Universitat Munchen- Grosshadern	DE002	World	9584	Measurements	0	5855	MEASUREMENTS	Measurements	21		48684	Skin discolouration	0		195324	28	2020-07-10 06:08:16	2020-07-10 06:08:16	2020-07-17 12:54:26	DE002		39.94		10.05		29.89		15.29		24.65		22.41		17.52		0.027		0.051		0.131
16	CP288	86	Prod	1108	81	2046	23	Klinikum der Universitat Munchen- Grosshadern	DE002	World	9584	Measurements	0	5855	MEASUREMENTS	Measurements	21		48684	Skin discolouration	0		195325	29	2020-07-10 06:08:16	2020-07-10 06:08:16	2020-07-17 12:54:26	DE002		21.78		11.62		10.16		16.02		5.759		18.49		3.289		0.076		0.177		0.496
16	CP288	86	Prod	1108	81	2046	23	Klinikum der Universitat Munchen- Grosshadern	DE002	World	9584	Measurements	0	5855	MEASUREMENTS	Measurements	21		48684	Skin discolouration	0		195326	30	2020-07-10 06:08:16	2020-07-10 06:08:16	2020-07-17 12:54:26	DE002		35.49		10.65		24.84		16.42		19.07		21.52		13.97		0.002		0.009		0.025
16	CP288	86	Prod	1108	81	2046	23	Klinikum der Universitat Munchen- Grosshadern	DE002	World	9584	Measurements	0	5855	MEASUREMENTS	Measurements	21		48684	Skin discolouration	0		195327	31	2020-07-10 06:08:16	2020-07-10 06:08:16	2020-07-17 12:54:26	DE002		37.67		9.834		27.84		16.83		20.84		23.01		14.66		0.272		0.52		1.244
16	CP288	86	Prod	1108	81	2046	23	Klinikum der Universitat Munchen- Grosshadern	DE002	World	9584	Measurements	0	5855	MEASUREMENTS	Measurements	21		48684	Skin discolouration	0		195328	32	2020-07-10 06:08:16	2020-07-10 06:08:16	2020-07-17 12:54:26	DE002		17.67		7.327		10.34		11.88		5.794		15.59		2.081		0.433		0.502		0.758
16	CP288	86	Prod	1108	81	2046	23	Klinikum der Universitat Munchen- Grosshadern	DE002	World	9584	Measurements	0	5855	MEASUREMENTS	Measurements	21		48684	Skin discolouration	0		195329	33	2020-07-10 06:08:16	2020-07-10 06:08:16	2020-07-17 12:54:26	DE002		36.67		11.89		24.78		18.53		18.14		24.42		12.25		0.055		0.123		0.469
16	CP288	86	Prod	1108	81	2046	23	Klinikum der Universitat Munchen- Grosshadern	DE002	World	9584	Measurements	0	5855	MEASUREMENTS	Measurements	21		48684	Skin discolouration	0		195330	34	2020-07-10 06:08:16	2020-07-10 06:08:16	2020-07-17 12:54:26	DE002		26.39		11.68		14.71		17.19		9.197		22.11		4.279		0.41		0.458		0.746
16	CP288	86	Prod	1108	81	2046	23	Klinikum der Universitat Munchen- Grosshadern	DE002	World	9584	Measurements	0	5855	MEASUREMENTS	Measurements	21		48684	Skin discolouration	0		195331	35	2020-07-10 06:08:16	2020-07-10 06:08:16	2020-07-17 12:54:26	DE002		31.27		14.65		16.61		23.9		7.372		29.35		1.927		0.011		0.014		0.05
16	CP288	86	Prod	1108	81	2046	23	Klinikum der Universitat Munchen- Grosshadern	DE002	World	9584	Measurements	0	5855	MEASUREMENTS	Measurements	21		48684	Skin discolouration	0		195332	36	2020-07-10 06:08:16	2020-07-10 06:08:16	2020-07-17 12:54:26	DE002		6.73		4.69		2.045		6.498		0.236		6.713		0.021		0.161		0.141		0.167
16	CP288	86	Prod	1108	81	2046	23	Klinikum der Universitat Munchen- Grosshadern	DE002	World	9584	Measurements	0	5855	MEASUREMENTS	Measurements	21		48684	Skin discolouration	0		195333	37	2020-07-10 06:08:16	2020-07-10 06:08:16	2020-07-17 12:54:26	DE002		25.2		8.269		16.93		12.99		12.21		16.94		8.264		0.687		0.804		1.18
16	CP288	86	Prod	1108	81	2046	23	Klinikum der Universitat Munchen- Grosshadern	DE002	World	9584	Measurements	0	5855	MEASUREMENTS	Measurements	21		48684	Skin discolouration	0		195334	38	2020-07-10 06:08:16	2020-07-10 06:08:16	2020-07-17 12:54:26	DE002		25.1		9.747		15.35		16.42		8.681		20.98		4.121		0.03		0.041		0.086
16	CP288	86	Prod	1109	81	2047	23	Klinikum der Universitat Munchen- Grosshadern	DE002	World	9615	Measurements	0	5855	MEASUREMENTS	Measurements	21		48744	Skin discolouration	0		132299	1	2020-07-10 06:08:04	2020-07-10 06:08:04	2020-07-17 12:54:26	DE002		57.99		4.553		53.44		8.801		49.19		14.49		43.49		0		0		0.001
16	CP288	86	Prod	1109	81	2047	23	Klinikum der Universitat Munchen- Grosshadern	DE002	World	9615	Measurements	0	5855	MEASUREMENTS	Measurements	21		48744	Skin discolouration	0		195095	2	2020-07-10 06:08:04	2020-07-10 06:08:04	2020-07-17 12:54:26	DE002		62.26		5.935		56.33		11.12		51.14		17.9		44.36		0		0		0
16	CP288	86	Prod	1109	81	2047	23	Klinikum der Universitat Munchen- Grosshadern	DE002	World	9615	Measurements	0	5855	MEASUREMENTS	Measurements	21		48744	Skin discolouration	0		195096	3	2020-07-10 06:08:04	2020-07-10 06:08:04	2020-07-17 12:54:26	DE002		36.64		2.182		34.46		4.341		32.3		8.411		28.23		0		0		0
16	CP288	86	Prod	1109	81	2047	23	Klinikum der Universitat Munchen- Grosshadern	DE002	World	9615	Measurements	0	5855	MEASUREMENTS	Measurements	21		48744	Skin discolouration	0		195097	4	2020-07-10 06:08:04	2020-07-10 06:08:04	2020-07-17 12:54:26	DE002		24.16		0.407		23.76		1.268		22.89		2.588		21.57		0.01		0.016		0.016
16	CP288	86	Prod	1109	81	2047	23	Klinikum der Universitat Munchen- Grosshadern	DE002	World	9615	Measurements	0	5855	MEASUREMENTS	Measurements	21		48744	Skin discolouration	0		195098	5	2020-07-10 06:08:04	2020-07-10 06:08:04	2020-07-17 12:54:26	DE002		25.86		0.871		24.99		1.581		24.28		2.621		23.24		0.006		0.004		0.095
16	CP288	86	Prod	1109	81	2047	23	Klinikum der Universitat Munchen- Grosshadern	DE002	World	9615	Measurements	0	5855	MEASUREMENTS	Measurements	21		48744	Skin discolouration	0		195099	6	2020-07-10 06:08:04	2020-07-10 06:08:04	2020-07-17 12:54:26	DE002		27.98		2.46		25.52		3.594		24.38		4.752		23.23		0		0.002		0.017
16	CP288	86	Prod	1114	80	2072	24	Sanitätshaus Fürst GmbH	DE003	World	9770	Measurements	0	5855	MEASUREMENTS	Measurements	21		49044	Skin discolouration	0		132748	1	2020-07-14 08:38:15	2020-07-14 08:38:15	2020-07-17 12:54:26	DE003		16.78		5.271		11.51		10.31		6.471		13.85		2.933		0.203		0.701		2.211
16	CP288	86	Prod	1114	80	2072	24	Sanitätshaus Fürst GmbH	DE003	World	9770	Measurements	0	5855	MEASUREMENTS	Measurements	21		49044	Skin discolouration	0		197230	2	2020-07-14 08:38:15	2020-07-14 08:38:15	2020-07-17 12:54:26	DE003		15.81		6.276		9.537		9.874		5.939		11.79		4.024		0.011		0.03		0.636
16	CP288	86	Prod	1114	80	2072	24	Sanitätshaus Fürst GmbH	DE003	World	9770	Measurements	0	5855	MEASUREMENTS	Measurements	21		49044	Skin discolouration	0		197231	3	2020-07-14 08:38:15	2020-07-14 08:38:15	2020-07-17 12:54:26	DE003		16.66		5.372		11.29		9.337		7.327		11.75		4.91		0.113		0.406		2.714
16	CP288	86	Prod	1114	80	2072	24	Sanitätshaus Fürst GmbH	DE003	World	9770	Measurements	0	5855	MEASUREMENTS	Measurements	21		49044	Skin discolouration	0		197232	4	2020-07-14 08:38:15	2020-07-14 08:38:15	2020-07-17 12:54:26	DE003		14.51		7.503		7.007		10.35		4.157		12		2.506		0.208		0.235		0.473
16	CP288	86	Prod	1114	80	2072	24	Sanitätshaus Fürst GmbH	DE003	World	9770	Measurements	0	5855	MEASUREMENTS	Measurements	21		49044	Skin discolouration	0		197233	5	2020-07-14 08:38:15	2020-07-14 08:38:15	2020-07-17 12:54:26	DE003		8.74		4.31		4.434		7.053		1.691		8.147		0.597		0.146		0.654		0.581
16	CP288	86	Prod	1114	80	2072	24	Sanitätshaus Fürst GmbH	DE003	World	9770	Measurements	0	5855	MEASUREMENTS	Measurements	21		49044	Skin discolouration	0		197234	6	2020-07-14 08:38:15	2020-07-14 08:38:15	2020-07-17 12:54:26	DE003		9.74		4.697		5.047		7.96		1.784		9.176		0.568		0.001		0.056		0.367
16	CP288	86	Prod	1114	80	2072	24	Sanitätshaus Fürst GmbH	DE003	World	9770	Measurements	0	5855	MEASUREMENTS	Measurements	21		49044	Skin discolouration	0		197235	7	2020-07-14 08:38:15	2020-07-14 08:38:15	2020-07-17 12:54:26	DE003		7.94		4.163		3.777		6.618		1.322		7.676		0.265		0.106		0.575		1.564
16	CP288	86	Prod	1114	80	2072	24	Sanitätshaus Fürst GmbH	DE003	World	9770	Measurements	0	5855	MEASUREMENTS	Measurements	21		49044	Skin discolouration	0		197236	8	2020-07-14 08:38:15	2020-07-14 08:38:15	2020-07-17 12:54:26	DE003		27.52		5.686		21.84		10.25		17.27		14.31		13.21		0.333		1.637		5.388
16	CP288	86	Prod	1114	80	2072	24	Sanitätshaus Fürst GmbH	DE003	World	9770	Measurements	0	5855	MEASUREMENTS	Measurements	21		49044	Skin discolouration	0		197237	9	2020-07-14 08:38:15	2020-07-14 08:38:15	2020-07-17 12:54:26	DE003		6.61		3.295		3.317		4.858		1.754		4.931		1.681		0.333		0.413		0.561
16	CP288	86	Prod	1114	80	2072	24	Sanitätshaus Fürst GmbH	DE003	World	9770	Measurements	0	5855	MEASUREMENTS	Measurements	21		49044	Skin discolouration	0		197238	10	2020-07-14 08:38:15	2020-07-14 08:38:15	2020-07-17 12:54:26	DE003		12.72		5.949		6.775		10.54		2.18		12.6		0.123		0.008		0.015		0.048
16	CP288	86	Prod	1114	80	2072	24	Sanitätshaus Fürst GmbH	DE003	World	9770	Measurements	0	5855	MEASUREMENTS	Measurements	21		49044	Skin discolouration	0		197239	11	2020-07-14 08:38:15	2020-07-14 08:38:15	2020-07-17 12:54:26	DE003		14.91		6.515		8.398		11.36		3.55		14.11		0.799		0.028		0.029		0.054
16	CP288	86	Prod	1114	80	2072	24	Sanitätshaus Fürst GmbH	DE003	World	9770	Measurements	0	5855	MEASUREMENTS	Measurements	21		49044	Skin discolouration	0		197240	12	2020-07-14 08:38:15	2020-07-14 08:38:15	2020-07-17 12:54:26	DE003		7.81		4.216		3.598		6.272		1.543		7.373		0.442		0		0.025		0.152
16	CP288	86	Prod	1114	80	2072	24	Sanitätshaus Fürst GmbH	DE003	World	9770	Measurements	0	5855	MEASUREMENTS	Measurements	21		49044	Skin discolouration	0		197241	13	2020-07-14 08:38:15	2020-07-14 08:38:15	2020-07-17 12:54:26	DE003		2.09		1.436		0.655		2.049		0.042		2.072		0.019		0.011		0.066		0.283
16	CP288	86	Prod	1114	80	2072	24	Sanitätshaus Fürst GmbH	DE003	World	9770	Measurements	0	5855	MEASUREMENTS	Measurements	21		49044	Skin discolouration	0		197242	14	2020-07-14 08:38:15	2020-07-14 08:38:15	2020-07-17 12:54:26	DE003		12.68		5.104		7.582		9.779		2.908		12.16		0.523		0.002		0.13		0.696
16	CP288	86	Prod	1114	80	2072	24	Sanitätshaus Fürst GmbH	DE003	World	9770	Measurements	0	5855	MEASUREMENTS	Measurements	21		49044	Skin discolouration	0		197243	15	2020-07-14 08:38:15	2020-07-14 08:38:15	2020-07-17 12:54:26	DE003		2.38		0.807		1.581		0.822		1.565		1.271		1.117		0		0		0.013
16	CP288	86	Prod	1114	80	2072	24	Sanitätshaus Fürst GmbH	DE003	World	9770	Measurements	0	5855	MEASUREMENTS	Measurements	21		49044	Skin discolouration	0		197244	16	2020-07-14 08:38:15	2020-07-14 08:38:15	2020-07-17 12:54:26	DE003		13.38		4.85		8.536		9.708		3.678		12.83		0.551		0		0.001		0.235
16	CP288	86	Prod	1114	80	2072	24	Sanitätshaus Fürst GmbH	DE003	World	9770	Measurements	0	5855	MEASUREMENTS	Measurements	21		49044	Skin discolouration	0		197245	17	2020-07-14 08:38:15	2020-07-14 08:38:15	2020-07-17 12:54:26	DE003		2.37		1.744		0.626		2.311		0.059		2.371		0		0.006		0.02		0.045
16	CP288	86	Prod	1114	80	2072	24	Sanitätshaus Fürst GmbH	DE003	World	9770	Measurements	0	5855	MEASUREMENTS	Measurements	21		49044	Skin discolouration	0		197246	18	2020-07-14 08:38:15	2020-07-14 08:38:15	2020-07-17 12:54:26	DE003		6.71		4.558		2.152		6.311		0.399		6.681		0.029		0.005		0.192		0.651
16	CP288	86	Prod	1114	80	2072	24	Sanitätshaus Fürst GmbH	DE003	World	9770	Measurements	0	5855	MEASUREMENTS	Measurements	21		49044	Skin discolouration	0		197247	19	2020-07-14 08:38:15	2020-07-14 08:38:15	2020-07-17 12:54:26	DE003		13.23		4.743		8.488		8.499		4.732		10.93		2.3		0.374		3.018		4.084
16	CP288	86	Prod	1114	80	2072	24	Sanitätshaus Fürst GmbH	DE003	World	9770	Measurements	0	5855	MEASUREMENTS	Measurements	21		49044	Skin discolouration	0		197248	20	2020-07-14 08:38:15	2020-07-14 08:38:15	2020-07-17 12:54:26	DE003		6.18		4.838		1.35		6.034		0.154		6.177		0.011		0.049		0.2		0.42
16	CP288	86	Prod	1114	80	2072	24	Sanitätshaus Fürst GmbH	DE003	World	9770	Measurements	0	5855	MEASUREMENTS	Measurements	21		49044	Skin discolouration	0		197249	21	2020-07-14 08:38:15	2020-07-14 08:38:15	2020-07-17 12:54:26	DE003		19.21		4.806		14.4		8.863		10.34		12.65		6.559		0.021		0.256		1.249
16	CP288	86	Prod	1114	80	2072	24	Sanitätshaus Fürst GmbH	DE003	World	9770	Measurements	0	5855	MEASUREMENTS	Measurements	21		49044	Skin discolouration	0		197250	22	2020-07-14 08:38:15	2020-07-14 08:38:15	2020-07-17 12:54:26	DE003		15.49		8.007		7.484		11.49		3.999		13.23		2.254		0.071		0.292		0.953
16	CP288	86	Prod	1115	80	2073	24	Sanitätshaus Fürst GmbH	DE003	World	9801	Measurements	0	5855	MEASUREMENTS	Measurements	21		49104	Skin discolouration	0		132828	1	2020-07-14 08:38:15	2020-07-14 08:38:15	2020-07-17 12:54:26	DE003		17.54		7.962		9.586		9.888		7.661		12.33		5.217		0		0		0.011
16	CP288	86	Prod	1115	80	2073	24	Sanitätshaus Fürst GmbH	DE003	World	9801	Measurements	0	5855	MEASUREMENTS	Measurements	21		49104	Skin discolouration	0		197251	2	2020-07-14 08:38:15	2020-07-14 08:38:15	2020-07-17 12:54:26	DE003		22.61		7.544		15.07		12.31		10.3		16.19		6.429		0		0		0.434
16	CP288	86	Prod	1115	80	2073	24	Sanitätshaus Fürst GmbH	DE003	World	9801	Measurements	0	5855	MEASUREMENTS	Measurements	21		49104	Skin discolouration	0		197252	3	2020-07-14 08:38:15	2020-07-14 08:38:15	2020-07-17 12:54:26	DE003		38.62		1.197		37.42		1.761		36.85		3.32		35.3		0.038		0.14		1.524
16	CP288	86	Prod	1115	80	2073	24	Sanitätshaus Fürst GmbH	DE003	World	9801	Measurements	0	5855	MEASUREMENTS	Measurements	21		49104	Skin discolouration	0		197253	4	2020-07-14 08:38:15	2020-07-14 08:38:15	2020-07-17 12:54:26	DE003		32.76		2.702		30.06		3.964		28.8		6.135		26.63		0.016		0.091		0.834
16	CP288	86	Prod	1115	80	2073	24	Sanitätshaus Fürst GmbH	DE003	World	9801	Measurements	0	5855	MEASUREMENTS	Measurements	21		49104	Skin discolouration	0		197254	5	2020-07-14 08:38:15	2020-07-14 08:38:15	2020-07-17 12:54:26	DE003		15.34		1.144		14.2		1.682		13.66		4.238		11.1		0.169		0.258		0.396
16	CP288	86	Prod	1115	80	2073	24	Sanitätshaus Fürst GmbH	DE003	World	9801	Measurements	0	5855	MEASUREMENTS	Measurements	21		49104	Skin discolouration	0		197255	6	2020-07-14 08:38:15	2020-07-14 08:38:15	2020-07-17 12:54:26	DE003		24.72		3.984		20.73		7.809		16.91		11.96		12.75		0		0		0.001
16	CP288	86	Prod	1115	80	2073	24	Sanitätshaus Fürst GmbH	DE003	World	9801	Measurements	0	5855	MEASUREMENTS	Measurements	21		49104	Skin discolouration	0		197256	7	2020-07-14 08:38:15	2020-07-14 08:38:15	2020-07-17 12:54:26	DE003		24.25		4.522		19.73		6.489		17.76		8.078		16.17		0.163		0.274		1.886
16	CP288	86	Prod	1115	80	2073	24	Sanitätshaus Fürst GmbH	DE003	World	9801	Measurements	0	5855	MEASUREMENTS	Measurements	21		49104	Skin discolouration	0		197257	8	2020-07-14 08:38:15	2020-07-14 08:38:15	2020-07-17 12:54:26	DE003		31.88		4.546		27.33		7.897		23.98		10.96		20.91		0.58		0.544		1.132
16	CP288	86	Prod	1115	80	2073	24	Sanitätshaus Fürst GmbH	DE003	World	9801	Measurements	0	5855	MEASUREMENTS	Measurements	21		49104	Skin discolouration	0		197258	9	2020-07-14 08:38:15	2020-07-14 08:38:15	2020-07-17 12:54:26	DE003		45.21		3.83		41.38		7.183		38.02		10.76		34.44		0.046		0.168		0.665
16	CP288	86	Prod	1115	80	2073	24	Sanitätshaus Fürst GmbH	DE003	World	9801	Measurements	0	5855	MEASUREMENTS	Measurements	21		49104	Skin discolouration	0		197259	10	2020-07-14 08:38:15	2020-07-14 08:38:15	2020-07-17 12:54:26	DE003		39.34		5.49		33.85		10.23		29.11		15.04		24.3		0.001		0.073		0.496
16	CP288	86	Prod	1115	80	2073	24	Sanitätshaus Fürst GmbH	DE003	World	9801	Measurements	0	5855	MEASUREMENTS	Measurements	21		49104	Skin discolouration	0		197260	11	2020-07-14 08:38:15	2020-07-14 08:38:15	2020-07-17 12:54:26	DE003		22.37		3.552		18.82		6.603		15.77		8.384		13.99		0.121		0.319		3.18
16	CP288	86	Prod	1115	80	2073	24	Sanitätshaus Fürst GmbH	DE003	World	9801	Measurements	0	5855	MEASUREMENTS	Measurements	21		49104	Skin discolouration	0		197261	12	2020-07-14 08:38:15	2020-07-14 08:38:15	2020-07-17 12:54:26	DE003		30.82		1.256		29.56		1.48		29.34		3.276		27.54		0		0.002		0.359
16	CP288	86	Prod	1115	80	2073	24	Sanitätshaus Fürst GmbH	DE003	World	9801	Measurements	0	5855	MEASUREMENTS	Measurements	21		49104	Skin discolouration	0		197262	13	2020-07-14 08:38:15	2020-07-14 08:38:15	2020-07-17 12:54:26	DE003		50.44		4.209		46.23		7.702		42.74		11.11		39.33		0.039		0.076		0.224
16	CP288	86	Prod	1115	80	2073	24	Sanitätshaus Fürst GmbH	DE003	World	9801	Measurements	0	5855	MEASUREMENTS	Measurements	21		49104	Skin discolouration	0		197263	14	2020-07-14 08:38:15	2020-07-14 08:38:15	2020-07-17 12:54:26	DE003		46.96		4.127		42.83		9.309		37.65		16.5		30.46		0.003		0.001		0.055
16	CP288	86	Prod	1115	80	2073	24	Sanitätshaus Fürst GmbH	DE003	World	9801	Measurements	0	5855	MEASUREMENTS	Measurements	21		49104	Skin discolouration	0		197264	15	2020-07-14 08:38:15	2020-07-14 08:38:15	2020-07-17 12:54:26	DE003		30.52		1.629		28.89		4.027		26.49		6.835		23.68		0.004		0.042		0.599
16	CP288	86	Prod	1115	80	2073	24	Sanitätshaus Fürst GmbH	DE003	World	9801	Measurements	0	5855	MEASUREMENTS	Measurements	21		49104	Skin discolouration	0		197265	16	2020-07-14 08:38:15	2020-07-14 08:38:15	2020-07-17 12:54:26	DE003		2.65		2.343		0.313		2.626		0.03		2.656		0		0		0.005		0.087
16	CP288	86	Prod	1115	80	2073	24	Sanitätshaus Fürst GmbH	DE003	World	9801	Measurements	0	5855	MEASUREMENTS	Measurements	21		49104	Skin discolouration	0		197266	17	2020-07-14 08:38:15	2020-07-14 08:38:15	2020-07-17 12:54:26	DE003		22.7		1.989		20.71		2.7		20		3.925		18.77		0.026		0.036		0.21
16	CP288	86	Prod	1115	80	2073	24	Sanitätshaus Fürst GmbH	DE003	World	9801	Measurements	0	5855	MEASUREMENTS	Measurements	21		49104	Skin discolouration	0		197267	18	2020-07-14 08:38:15	2020-07-14 08:38:15	2020-07-17 12:54:26	DE003		8.12		3.871		4.252		6.043		2.08		7.254		0.869		0		0		0.011
16	CP288	86	Prod	1115	80	2073	24	Sanitätshaus Fürst GmbH	DE003	World	9801	Measurements	0	5855	MEASUREMENTS	Measurements	21		49104	Skin discolouration	0		197268	19	2020-07-14 08:38:15	2020-07-14 08:38:15	2020-07-17 12:54:26	DE003		27.75		3.371		24.38		5.678		22.07		8.324		19.43		0.108		0.196		0.653
16	CP288	86	Prod	1115	80	2073	24	Sanitätshaus Fürst GmbH	DE003	World	9801	Measurements	0	5855	MEASUREMENTS	Measurements	21		49104	Skin discolouration	0		197269	20	2020-07-14 08:38:15	2020-07-14 08:38:15	2020-07-17 12:54:26	DE003		35.03		2.393		32.64		5.476		29.56		9.579		25.45		0.185		0.528		1.458
16	CP288	86	Prod	1115	80	2073	24	Sanitätshaus Fürst GmbH	DE003	World	9801	Measurements	0	5855	MEASUREMENTS	Measurements	21		49104	Skin discolouration	0		197270	21	2020-07-14 08:38:15	2020-07-14 08:38:15	2020-07-17 12:54:26	DE003		40.27		5.432		34.84		9.043		31.23		12.55		27.72		0.074		0.617		0.838
16	CP288	86	Prod	1115	80	2073	24	Sanitätshaus Fürst GmbH	DE003	World	9801	Measurements	0	5855	MEASUREMENTS	Measurements	21		49104	Skin discolouration	0		197271	22	2020-07-14 08:38:15	2020-07-14 08:38:15	2020-07-17 12:54:26	DE003		29.12		2.354		26.76		3.62		25.5		6.186		22.93		0.036		0.084		0.495
16	CP288	86	Prod	1115	80	2073	24	Sanitätshaus Fürst GmbH	DE003	World	9801	Measurements	0	5855	MEASUREMENTS	Measurements	21		49104	Skin discolouration	0		197272	23	2020-07-14 08:38:15	2020-07-14 08:38:15	2020-07-17 12:54:26	DE003		30.04		3.554		26.49		7.18		22.86		11.75		18.28		0.102		0.259		1.669
16	CP288	86	Prod	1115	80	2073	24	Sanitätshaus Fürst GmbH	DE003	World	9801	Measurements	0	5855	MEASUREMENTS	Measurements	21		49104	Skin discolouration	0		197273	24	2020-07-14 08:38:15	2020-07-14 08:38:15	2020-07-17 12:54:26	DE003		25.01		0.929		24.08		0.97		24.04		2.407		22.6		0.137		0.463		7.34
16	CP288	86	Prod	1115	80	2073	24	Sanitätshaus Fürst GmbH	DE003	World	9801	Measurements	0	5855	MEASUREMENTS	Measurements	21		49104	Skin discolouration	0		197274	25	2020-07-14 08:38:15	2020-07-14 08:38:15	2020-07-17 12:54:26	DE003		34.23		1.537		32.69		3.305		30.92		6.466		27.76		0.067		0.201		2.418
16	CP288	86	Prod	1115	80	2073	24	Sanitätshaus Fürst GmbH	DE003	World	9801	Measurements	0	5855	MEASUREMENTS	Measurements	21		49104	Skin discolouration	0		197275	26	2020-07-14 08:38:15	2020-07-14 08:38:15	2020-07-17 12:54:26	DE003		34.32		3.371		30.95		5.816		28.51		8.59		25.73		0.076		0.248		0.424
16	CP288	86	Prod	1115	80	2073	24	Sanitätshaus Fürst GmbH	DE003	World	9801	Measurements	0	5855	MEASUREMENTS	Measurements	21		49104	Skin discolouration	0		197276	27	2020-07-14 08:38:15	2020-07-14 08:38:15	2020-07-17 12:54:26	DE003		17.04		4.616		12.42		7.81		9.23		9.781		7.259		0.078		0.133		0.268
16	CP288	86	Prod	1116	80	2074	24	Sanitätshaus Fürst GmbH	DE003	World	9832	Measurements	0	5855	MEASUREMENTS	Measurements	21		49164	Skin discolouration	0		132908	1	2020-07-14 08:38:14	2020-07-14 08:38:14	2020-07-17 12:54:26	DE003		11.57		9.909		1.663		11.37		0.2		11.54		0.027		0.005		0.006		0.003
16	CP288	86	Prod	1116	80	2074	24	Sanitätshaus Fürst GmbH	DE003	World	9832	Measurements	0	5855	MEASUREMENTS	Measurements	21		49164	Skin discolouration	0		197221	2	2020-07-14 08:38:14	2020-07-14 08:38:14	2020-07-17 12:54:26	DE003		8.93		0.395		8.54		0.188		8.746		0.137		8.797		1.229		0.756		0.456
16	CP288	86	Prod	1116	80	2074	24	Sanitätshaus Fürst GmbH	DE003	World	9832	Measurements	0	5855	MEASUREMENTS	Measurements	21		49164	Skin discolouration	0		197222	3	2020-07-14 08:38:14	2020-07-14 08:38:14	2020-07-17 12:54:26	DE003		20.87		0.582		20.29		0.246		20.63		0.214		20.66		0.129		0.14		0.11
16	CP288	86	Prod	1116	80	2074	24	Sanitätshaus Fürst GmbH	DE003	World	9832	Measurements	0	5855	MEASUREMENTS	Measurements	21		49164	Skin discolouration	0		197223	4	2020-07-14 08:38:14	2020-07-14 08:38:14	2020-07-17 12:54:26	DE003		5.29		0.204		5.095		0.043		5.256		0.049		5.25		0.066		0.05		0.077
16	CP288	86	Prod	1116	80	2074	24	Sanitätshaus Fürst GmbH	DE003	World	9832	Measurements	0	5855	MEASUREMENTS	Measurements	21		49164	Skin discolouration	0		197224	5	2020-07-14 08:38:14	2020-07-14 08:38:14	2020-07-17 12:54:26	DE003		26.5		1.467		25.03		0.998		25.5		0.763		25.73		0.021		0.019		0.054
16	CP288	86	Prod	1116	80	2074	24	Sanitätshaus Fürst GmbH	DE003	World	9832	Measurements	0	5855	MEASUREMENTS	Measurements	21		49164	Skin discolouration	0		197225	6	2020-07-14 08:38:14	2020-07-14 08:38:14	2020-07-17 12:54:26	DE003		46.64		14.02		32.62		19.44		27.19		24.9		21.74		0		0		0
16	CP288	86	Prod	1116	80	2074	24	Sanitätshaus Fürst GmbH	DE003	World	9832	Measurements	0	5855	MEASUREMENTS	Measurements	21		49164	Skin discolouration	0		197226	7	2020-07-14 08:38:14	2020-07-14 08:38:14	2020-07-17 12:54:26	DE003		13.71		0.76		12.95		0.306		13.41		0.025		13.69		1.129		1.137		3.331
16	CP288	86	Prod	1116	80	2074	24	Sanitätshaus Fürst GmbH	DE003	World	9832	Measurements	0	5855	MEASUREMENTS	Measurements	21		49164	Skin discolouration	0		197227	8	2020-07-14 08:38:14	2020-07-14 08:38:14	2020-07-17 12:54:26	DE003		13.95		0.78		13.17		0.384		13.57		0.269		13.68		0.015		0.328		0.56
16	CP288	86	Prod	1116	80	2074	24	Sanitätshaus Fürst GmbH	DE003	World	9832	Measurements	0	5855	MEASUREMENTS	Measurements	21		49164	Skin discolouration	0		197228	9	2020-07-14 08:38:14	2020-07-14 08:38:14	2020-07-17 12:54:26	DE003		22.63		1.063		21.56		0.672		21.96		0.291		22.34		0.031		0.05		0.072
16	CP288	86	Prod	1116	80	2074	24	Sanitätshaus Fürst GmbH	DE003	World	9832	Measurements	0	5855	MEASUREMENTS	Measurements	21		49164	Skin discolouration	0		197229	10	2020-07-14 08:38:14	2020-07-14 08:38:14	2020-07-17 12:54:26	DE003		9.25		0.169		9.083		0.064		9.188		0.032		9.22		2.943		1.409		0.532
16	CP288	86	Prod	1117	80	2075	24	Sanitätshaus Fürst GmbH	DE003	World	9863	Measurements	0	5855	MEASUREMENTS	Measurements	21		49224	Skin discolouration	0		132988	1	2020-07-14 08:38:12	2020-07-14 08:38:12	2020-07-17 12:54:26	DE003		33.34		3.322		30.02		8.766		24.57		15.68		17.65		0.325		0.898		3.492
16	CP288	86	Prod	1171	82	1001	25	NO001	NO001	World	11390	Measurements	0	7008	MEASUREMENTS	Measurements	21		52565	Skin discolouration	0		137671	1	2020-07-13 15:49:53	2020-07-13 15:49:53	2020-07-17 12:54:26	NO001		21.19		4.158		17.03		8.078		13.11		13		8.19		0		0		0
16	CP288	86	Prod	1171	82	1001	25	NO001	NO001	World	11390	Measurements	0	7008	MEASUREMENTS	Measurements	21		52565	Skin discolouration	0		195787	2	2020-07-13 15:49:53	2020-07-13 15:49:53	2020-07-17 12:54:26	NO001		10.19		4.308		5.885		6.555		3.638		7.776		2.417		0		0.023		0.031
16	CP288	86	Prod	1171	82	1001	25	NO001	NO001	World	11390	Measurements	0	7008	MEASUREMENTS	Measurements	21		52565	Skin discolouration	0		195788	3	2020-07-13 15:49:53	2020-07-13 15:49:53	2020-07-17 12:54:26	NO001		17.06		9.318		7.752		12.83		4.234		14.54		2.523		1.367		1.322		0.959
16	CP288	86	Prod	1171	82	1001	25	NO001	NO001	World	11390	Measurements	0	7008	MEASUREMENTS	Measurements	21		52565	Skin discolouration	0		195789	4	2020-07-13 15:49:53	2020-07-13 15:49:53	2020-07-17 12:54:26	NO001		25.87		11.76		14.11		16.21		9.665		19.9		5.968		0.005		0.107		0.476
16	CP288	86	Prod	1171	82	1001	25	NO001	NO001	World	11390	Measurements	0	7008	MEASUREMENTS	Measurements	21		52565	Skin discolouration	0		195790	5	2020-07-13 15:49:53	2020-07-13 15:49:53	2020-07-17 12:54:26	NO001		21.65		7.088		14.56		9.55		12.1		11.76		9.885		0		0		0.048
16	CP288	86	Prod	1171	82	1001	25	NO001	NO001	World	11390	Measurements	0	7008	MEASUREMENTS	Measurements	21		52565	Skin discolouration	0		195791	6	2020-07-13 15:49:53	2020-07-13 15:49:53	2020-07-17 12:54:26	NO001		26.21		10.74		15.46		15.17		11.03		16.21		9.998		0.006		0.01		0.014
16	CP288	86	Prod	1171	82	1001	25	NO001	NO001	World	11390	Measurements	0	7008	MEASUREMENTS	Measurements	21		52565	Skin discolouration	0		195792	7	2020-07-13 15:49:53	2020-07-13 15:49:53	2020-07-17 12:54:26	NO001		14.98		6.127		8.857		9.536		5.449		11.56		3.42		0.01		0.022		0.076
16	CP288	86	Prod	1171	82	1001	25	NO001	NO001	World	11390	Measurements	0	7008	MEASUREMENTS	Measurements	21		52565	Skin discolouration	0		195793	8	2020-07-13 15:49:53	2020-07-13 15:49:53	2020-07-17 12:54:26	NO001		48.26		8.404		39.86		14.62		33.64		20.94		27.32		0.039		0.172		1.191
16	CP288	86	Prod	1171	82	1001	25	NO001	NO001	World	11390	Measurements	0	7008	MEASUREMENTS	Measurements	21		52565	Skin discolouration	0		195794	9	2020-07-13 15:49:53	2020-07-13 15:49:53	2020-07-17 12:54:26	NO001		38.23		7.61		30.62		14.33		23.89		19.11		19.11		0		0.006		0.035
16	CP288	86	Prod	1171	82	1001	25	NO001	NO001	World	11390	Measurements	0	7008	MEASUREMENTS	Measurements	21		52565	Skin discolouration	0		195795	10	2020-07-13 15:49:53	2020-07-13 15:49:53	2020-07-17 12:54:26	NO001		14.26		5.108		9.155		8.338		5.925		10.96		3.298		0.024		0.01		0.075
16	CP288	86	Prod	1171	82	1001	25	NO001	NO001	World	11390	Measurements	0	7008	MEASUREMENTS	Measurements	21		52565	Skin discolouration	0		195796	11	2020-07-13 15:49:53	2020-07-13 15:49:53	2020-07-17 12:54:26	NO001		20.79		11.09		9.698		16.26		4.532		18.69		2.1		0.001		0.037		0.02
16	CP288	86	Prod	1171	82	1001	25	NO001	NO001	World	11390	Measurements	0	7008	MEASUREMENTS	Measurements	21		52565	Skin discolouration	0		195797	12	2020-07-13 15:49:53	2020-07-13 15:49:53	2020-07-17 12:54:26	NO001		44.36		8.328		36.03		15.86		28.5		23.1		21.26		0.002		0.503		1.29
16	CP288	86	Prod	1171	82	1001	25	NO001	NO001	World	11390	Measurements	0	7008	MEASUREMENTS	Measurements	21		52565	Skin discolouration	0		195798	13	2020-07-13 15:49:53	2020-07-13 15:49:53	2020-07-17 12:54:26	NO001		29.93		5.701		24.23		10.65		19.28		16.44		13.49		0		0		0.451
16	CP288	86	Prod	1171	82	1001	25	NO001	NO001	World	11390	Measurements	0	7008	MEASUREMENTS	Measurements	21		52565	Skin discolouration	0		195799	14	2020-07-13 15:49:53	2020-07-13 15:49:53	2020-07-17 12:54:26	NO001		29.09		6.622		22.46		12.65		16.43		17.05		12.03		0.009		0.087		0.217
16	CP288	86	Prod	1171	82	1001	25	NO001	NO001	World	11390	Measurements	0	7008	MEASUREMENTS	Measurements	21		52565	Skin discolouration	0		195800	15	2020-07-13 15:49:53	2020-07-13 15:49:53	2020-07-17 12:54:26	NO001		39.41		5.688		33.72		10.24		29.16		14.75		24.66		0		0		0.001
16	CP288	86	Prod	1171	82	1001	25	NO001	NO001	World	11390	Measurements	0	7008	MEASUREMENTS	Measurements	21		52565	Skin discolouration	0		195801	16	2020-07-13 15:49:53	2020-07-13 15:49:53	2020-07-17 12:54:26	NO001		26.41		9.608		16.8		14.81		11.59		17.35		9.06		0		0		0
16	CP288	86	Prod	1171	82	1001	25	NO001	NO001	World	11390	Measurements	0	7008	MEASUREMENTS	Measurements	21		52565	Skin discolouration	0		195802	17	2020-07-13 15:49:53	2020-07-13 15:49:53	2020-07-17 12:54:26	NO001		14.86		5.838		9.028		8.322		6.545		9.604		5.262		0		0		0.015
16	CP288	86	Prod	1171	82	1001	25	NO001	NO001	World	11390	Measurements	0	7008	MEASUREMENTS	Measurements	21		52565	Skin discolouration	0		195803	18	2020-07-13 15:49:53	2020-07-13 15:49:53	2020-07-17 12:54:26	NO001		42.76		9.936		32.82		20.07		22.68		28.17		14.59		0		0		0
16	CP288	86	Prod	1171	82	1001	25	NO001	NO001	World	11390	Measurements	0	7008	MEASUREMENTS	Measurements	21		52565	Skin discolouration	0		195804	19	2020-07-13 15:49:53	2020-07-13 15:49:53	2020-07-17 12:54:26	NO001		31.46		12.89		18.56		18.17		13.28		23.04		8.413		0		0		0.009
16	CP288	86	Prod	1171	82	1001	25	NO001	NO001	World	11390	Measurements	0	7008	MEASUREMENTS	Measurements	21		52565	Skin discolouration	0		195805	20	2020-07-13 15:49:53	2020-07-13 15:49:53	2020-07-17 12:54:26	NO001		19.72		8.571		11.15		13.19		6.521		15.55		4.162		0.018		0.363		1.122
16	CP288	86	Prod	1171	82	1001	25	NO001	NO001	World	11390	Measurements	0	7008	MEASUREMENTS	Measurements	21		52565	Skin discolouration	0		195806	21	2020-07-13 15:49:53	2020-07-13 15:49:53	2020-07-17 12:54:26	NO001		11.96		6.169		5.794		9.083		2.88		10.65		1.308		0		0		0
16	CP288	86	Prod	1171	82	1001	25	NO001	NO001	World	11390	Measurements	0	7008	MEASUREMENTS	Measurements	21		52565	Skin discolouration	0		195807	22	2020-07-13 15:49:53	2020-07-13 15:49:53	2020-07-17 12:54:26	NO001		17.82		1.631		16.18		3.088		14.73		4.925		12.89		0		0		0
16	CP288	86	Prod	1171	82	1001	25	NO001	NO001	World	11390	Measurements	0	7008	MEASUREMENTS	Measurements	21		52565	Skin discolouration	0		195808	23	2020-07-13 15:49:53	2020-07-13 15:49:53	2020-07-17 12:54:26	NO001		16.81		8.082		8.737		11.76		5.053		14.85		1.968		0		0.003		0.077
16	CP288	86	Prod	1171	82	1001	25	NO001	NO001	World	11390	Measurements	0	7008	MEASUREMENTS	Measurements	21		52565	Skin discolouration	0		195809	24	2020-07-13 15:49:53	2020-07-13 15:49:53	2020-07-17 12:54:26	NO001		19.26		5.109		14.15		8.307		10.96		11.63		7.634		0.047		0.148		0.334
16	CP288	86	Prod	1171	82	1001	25	NO001	NO001	World	11390	Measurements	0	7008	MEASUREMENTS	Measurements	21		52565	Skin discolouration	0		195810	25	2020-07-13 15:49:53	2020-07-13 15:49:53	2020-07-17 12:54:26	NO001		15.72		5.652		10.07		7.862		7.86		10.35		5.367		0		0.001		0.001
16	CP288	86	Prod	1171	82	1001	25	NO001	NO001	World	11390	Measurements	0	7008	MEASUREMENTS	Measurements	21		52565	Skin discolouration	0		195811	26	2020-07-13 15:49:53	2020-07-13 15:49:53	2020-07-17 12:54:26	NO001		23.9		9.684		14.21		14.05		9.846		16.6		7.294		0		0		0
16	CP288	86	Prod	1171	82	1001	25	NO001	NO001	World	11390	Measurements	0	7008	MEASUREMENTS	Measurements	21		52565	Skin discolouration	0		195812	27	2020-07-13 15:49:53	2020-07-13 15:49:53	2020-07-17 12:54:26	NO001		32.91		8.751		24.16		11.97		20.93		15.28		17.62		0		0.004		0.019
16	CP288	86	Prod	1171	82	1001	25	NO001	NO001	World	11390	Measurements	0	7008	MEASUREMENTS	Measurements	21		52565	Skin discolouration	0		195813	28	2020-07-13 15:49:53	2020-07-13 15:49:53	2020-07-17 12:54:26	NO001		16.67		4.329		12.34		6.912		9.765		9.061		7.616		0		0		0
16	CP288	86	Prod	1171	82	1001	25	NO001	NO001	World	11390	Measurements	0	7008	MEASUREMENTS	Measurements	21		52565	Skin discolouration	0		195814	29	2020-07-13 15:49:53	2020-07-13 15:49:53	2020-07-17 12:54:26	NO001		18.18		6.557		11.62		8.362		9.82		9.517		8.665		0.056		0.17		0.419
16	CP288	86	Prod	1172	82	1002	25	NO001	NO001	World	11421	Measurements	0	7008	MEASUREMENTS	Measurements	21		52625	Skin discolouration	0		137702	1	2020-07-13 15:49:50	2020-07-13 15:49:50	2020-07-17 12:54:26	NO001		4.45		4.064		0.387		4.065		0.386		4.065		0.386		0		0.01		0.212
16	CP288	86	Prod	1172	82	1002	25	NO001	NO001	World	11421	Measurements	0	7008	MEASUREMENTS	Measurements	21		52625	Skin discolouration	0		195786	2	2020-07-13 15:49:50	2020-07-13 15:49:50	2020-07-17 12:54:26	NO001		2.6		1.604		1.002		1.619		0.987		1.619		0.987		0		0		0
16	CP288	86	Prod	1173	82	1003	25	NO001	NO001	World	11452	Measurements	0	7008	MEASUREMENTS	Measurements	21		52685	Skin discolouration	0		137831	1	2020-07-13 15:49:56	2020-07-13 15:49:56	2020-07-17 12:54:26	NO001		20.79		1.293		19.49		2		18.79		4.285		16.5		0.004		0.033		0.135
16	CP288	86	Prod	1173	82	1003	25	NO001	NO001	World	11452	Measurements	0	7008	MEASUREMENTS	Measurements	21		52685	Skin discolouration	0		195840	2	2020-07-13 15:49:56	2020-07-13 15:49:56	2020-07-17 12:54:26	NO001		18.57		2.004		16.57		3.471		15.1		6.27		12.3		0		0.006		0.488
16	CP288	86	Prod	1173	82	1003	25	NO001	NO001	World	11452	Measurements	0	7008	MEASUREMENTS	Measurements	21		52685	Skin discolouration	0		195841	3	2020-07-13 15:49:56	2020-07-13 15:49:56	2020-07-17 12:54:26	NO001		2.2		0.871		1.336		0.988		1.219		1.154		1.053		0		0		0.011
16	CP288	86	Prod	1173	82	1003	25	NO001	NO001	World	11452	Measurements	0	7008	MEASUREMENTS	Measurements	21		52685	Skin discolouration	0		195842	4	2020-07-13 15:49:56	2020-07-13 15:49:56	2020-07-17 12:54:26	NO001		54.28		6.569		47.71		12.91		41.37		19.73		34.55		0.007		0.002		0.022
16	CP288	86	Prod	1173	82	1003	25	NO001	NO001	World	11452	Measurements	0	7008	MEASUREMENTS	Measurements	21		52685	Skin discolouration	0		195843	5	2020-07-13 15:49:56	2020-07-13 15:49:56	2020-07-17 12:54:26	NO001		7.94		1.06		6.881		1.3		6.642		2.149		5.792		0		0.212		1.454
16	CP288	86	Prod	1173	82	1003	25	NO001	NO001	World	11452	Measurements	0	7008	MEASUREMENTS	Measurements	21		52685	Skin discolouration	0		195844	6	2020-07-13 15:49:56	2020-07-13 15:49:56	2020-07-17 12:54:26	NO001		26.47		3.962		22.5		7.961		18.51		12.36		14.1		0		0		0.003
16	CP288	86	Prod	1173	82	1003	25	NO001	NO001	World	11452	Measurements	0	7008	MEASUREMENTS	Measurements	21		52685	Skin discolouration	0		195845	7	2020-07-13 15:49:56	2020-07-13 15:49:56	2020-07-17 12:54:26	NO001		31.59		3.481		28.11		7.718		23.87		12.77		18.81		0		0		0.048
16	CP288	86	Prod	1173	82	1003	25	NO001	NO001	World	11452	Measurements	0	7008	MEASUREMENTS	Measurements	21		52685	Skin discolouration	0		195846	8	2020-07-13 15:49:56	2020-07-13 15:49:56	2020-07-17 12:54:26	NO001		36.55		6.188		30.36		11.86		24.69		17.95		18.6		0		0		0.001
16	CP288	86	Prod	1173	82	1003	25	NO001	NO001	World	11452	Measurements	0	7008	MEASUREMENTS	Measurements	21		52685	Skin discolouration	0		195847	9	2020-07-13 15:49:56	2020-07-13 15:49:56	2020-07-17 12:54:26	NO001		1.83		1.786		0.05		1.813		0.022		1.813		0.022		0.003		0.005		0.013
16	CP288	86	Prod	1173	82	1003	25	NO001	NO001	World	11452	Measurements	0	7008	MEASUREMENTS	Measurements	21		52685	Skin discolouration	0		195848	10	2020-07-13 15:49:56	2020-07-13 15:49:56	2020-07-17 12:54:26	NO001		59.73		2.623		57.11		6.021		53.71		10.62		49.11		0		0		0.004
16	CP288	86	Prod	1173	82	1003	25	NO001	NO001	World	11452	Measurements	0	7008	MEASUREMENTS	Measurements	21		52685	Skin discolouration	0		195849	11	2020-07-13 15:49:56	2020-07-13 15:49:56	2020-07-17 12:54:26	NO001		30.82		5.196		25.62		10.65		20.17		15.93		14.88		0		0		0.048
16	CP288	86	Prod	1173	82	1003	25	NO001	NO001	World	11452	Measurements	0	7008	MEASUREMENTS	Measurements	21		52685	Skin discolouration	0		195850	12	2020-07-13 15:49:56	2020-07-13 15:49:56	2020-07-17 12:54:26	NO001		40.59		2.378		38.21		3.935		36.66		6.412		34.18		0		0		0
16	CP288	86	Prod	1173	82	1003	25	NO001	NO001	World	11452	Measurements	0	7008	MEASUREMENTS	Measurements	21		52685	Skin discolouration	0		195851	13	2020-07-13 15:49:56	2020-07-13 15:49:56	2020-07-17 12:54:26	NO001		30.89		3.582		27.31		7.512		23.38		13.19		17.7		0		0		0.024
16	CP288	86	Prod	1173	82	1003	25	NO001	NO001	World	11452	Measurements	0	7008	MEASUREMENTS	Measurements	21		52685	Skin discolouration	0		195852	14	2020-07-13 15:49:56	2020-07-13 15:49:56	2020-07-17 12:54:26	NO001		11.57		2.51		9.064		4.849		6.724		6.788		4.786		0		0		0
16	CP288	86	Prod	1173	82	1003	25	NO001	NO001	World	11452	Measurements	0	7008	MEASUREMENTS	Measurements	21		52685	Skin discolouration	0		195853	15	2020-07-13 15:49:56	2020-07-13 15:49:56	2020-07-17 12:54:26	NO001		55.54		4.687		50.85		8.962		46.57		13.16		42.37		0		0		0
16	CP288	86	Prod	1173	82	1003	25	NO001	NO001	World	11452	Measurements	0	7008	MEASUREMENTS	Measurements	21		52685	Skin discolouration	0		195854	16	2020-07-13 15:49:56	2020-07-13 15:49:56	2020-07-17 12:54:26	NO001		13.5		1.677		11.82		3.23		10.27		5.038		8.468		0.003		0.134		0.62
16	CP288	86	Prod	1173	82	1003	25	NO001	NO001	World	11452	Measurements	0	7008	MEASUREMENTS	Measurements	21		52685	Skin discolouration	0		195855	17	2020-07-13 15:49:56	2020-07-13 15:49:56	2020-07-17 12:54:26	NO001		42.67		8.284		34.39		16.2		26.47		23.81		18.85		0		0		0
16	CP288	86	Prod	1173	82	1003	25	NO001	NO001	World	11452	Measurements	0	7008	MEASUREMENTS	Measurements	21		52685	Skin discolouration	0		195856	18	2020-07-13 15:49:56	2020-07-13 15:49:56	2020-07-17 12:54:26	NO001		17.74		1.735		16.01		3.152		14.59		6.979		10.76		0		0		0.059
16	CP288	86	Prod	1173	82	1003	25	NO001	NO001	World	11452	Measurements	0	7008	MEASUREMENTS	Measurements	21		52685	Skin discolouration	0		195857	19	2020-07-13 15:49:56	2020-07-13 15:49:56	2020-07-17 12:54:26	NO001		38.58		2.401		36.18		5.787		32.8		10.23		28.35		0		0		0.001
16	CP288	86	Prod	1173	82	1003	25	NO001	NO001	World	11452	Measurements	0	7008	MEASUREMENTS	Measurements	21		52685	Skin discolouration	0		195858	20	2020-07-13 15:49:56	2020-07-13 15:49:56	2020-07-17 12:54:26	NO001		25.65		3.147		22.51		8.098		17.56		12.36		13.29		0.008		0.011		0.34
16	CP288	86	Prod	1173	82	1003	25	NO001	NO001	World	11452	Measurements	0	7008	MEASUREMENTS	Measurements	21		52685	Skin discolouration	0		195859	21	2020-07-13 15:49:56	2020-07-13 15:49:56	2020-07-17 12:54:26	NO001		15.19		2.573		12.62		4.194		11		6.906		8.293		0		0		0
16	CP288	86	Prod	1173	82	1003	25	NO001	NO001	World	11452	Measurements	0	7008	MEASUREMENTS	Measurements	21		52685	Skin discolouration	0		195860	22	2020-07-13 15:49:56	2020-07-13 15:49:56	2020-07-17 12:54:26	NO001		47.19		7.455		39.74		14.19		33		21.2		25.99		0		0		0.007
16	CP288	86	Prod	1173	82	1003	25	NO001	NO001	World	11452	Measurements	0	7008	MEASUREMENTS	Measurements	21		52685	Skin discolouration	0		195861	23	2020-07-13 15:49:56	2020-07-13 15:49:56	2020-07-17 12:54:26	NO001		6.11		1.229		4.888		1.646		4.471		1.994		4.123		0.053		0.344		0.762
16	CP288	86	Prod	1173	82	1003	25	NO001	NO001	World	11452	Measurements	0	7008	MEASUREMENTS	Measurements	21		52685	Skin discolouration	0		195862	24	2020-07-13 15:49:56	2020-07-13 15:49:56	2020-07-17 12:54:26	NO001		12.35		5.059		7.294		7.447		4.906		9.996		2.357		0		0		0.041
16	CP288	86	Prod	1173	82	1003	25	NO001	NO001	World	11452	Measurements	0	7008	MEASUREMENTS	Measurements	21		52685	Skin discolouration	0		195863	25	2020-07-13 15:49:56	2020-07-13 15:49:56	2020-07-17 12:54:26	NO001		33.11		5.217		27.89		10.23		22.87		14.83		18.28		0		0		0.012
16	CP288	86	Prod	1173	82	1003	25	NO001	NO001	World	11452	Measurements	0	7008	MEASUREMENTS	Measurements	21		52685	Skin discolouration	0		195864	26	2020-07-13 15:49:56	2020-07-13 15:49:56	2020-07-17 12:54:26	NO001		11.52		0.844		10.68		2.08		9.446		3.482		8.044		0		0		0
16	CP288	86	Prod	1173	82	1003	25	NO001	NO001	World	11452	Measurements	0	7008	MEASUREMENTS	Measurements	21		52685	Skin discolouration	0		195865	27	2020-07-13 15:49:56	2020-07-13 15:49:56	2020-07-17 12:54:26	NO001		8.4		2.164		6.245		4.638		3.771		7.175		1.234		0		0.1		0.804
16	CP288	86	Prod	1173	82	1003	25	NO001	NO001	World	11452	Measurements	0	7008	MEASUREMENTS	Measurements	21		52685	Skin discolouration	0		195866	28	2020-07-13 15:49:56	2020-07-13 15:49:56	2020-07-17 12:54:26	NO001		25.38		2.374		23.01		5.02		20.36		7.708		17.68		0		0		0.027
16	CP288	86	Prod	1173	82	1003	25	NO001	NO001	World	11452	Measurements	0	7008	MEASUREMENTS	Measurements	21		52685	Skin discolouration	0		195867	29	2020-07-13 15:49:56	2020-07-13 15:49:56	2020-07-17 12:54:26	NO001		11.66		1.09		10.57		1.322		10.34		3.07		8.597		0.009		0.333		1.381
16	CP288	86	Prod	1173	82	1003	25	NO001	NO001	World	11452	Measurements	0	7008	MEASUREMENTS	Measurements	21		52685	Skin discolouration	0		195868	30	2020-07-13 15:49:56	2020-07-13 15:49:56	2020-07-17 12:54:26	NO001		16.58		2.442		14.14		3.955		12.63		5.87		10.71		0		0		0
16	CP288	86	Prod	1173	82	1003	25	NO001	NO001	World	11452	Measurements	0	7008	MEASUREMENTS	Measurements	21		52685	Skin discolouration	0		195869	31	2020-07-13 15:49:56	2020-07-13 15:49:56	2020-07-17 12:54:26	NO001		31.86		3.626		28.23		8.553		23.3		12.89		18.96		0		0.001		0.577
16	CP288	86	Prod	1173	82	1003	25	NO001	NO001	World	11452	Measurements	0	7008	MEASUREMENTS	Measurements	21		52685	Skin discolouration	0		195870	32	2020-07-13 15:49:56	2020-07-13 15:49:56	2020-07-17 12:54:26	NO001		19.85		2.066		17.78		4.91		14.94		7.259		12.59		1.458		3.204		4.191
16	CP288	86	Prod	1173	82	1003	25	NO001	NO001	World	11452	Measurements	0	7008	MEASUREMENTS	Measurements	21		52685	Skin discolouration	0		195871	33	2020-07-13 15:49:56	2020-07-13 15:49:56	2020-07-17 12:54:26	NO001		16.75		2.837		13.92		5.72		11.04		8.731		8.028		0		0		0.075
16	CP288	86	Prod	1173	82	1003	25	NO001	NO001	World	11452	Measurements	0	7008	MEASUREMENTS	Measurements	21		52685	Skin discolouration	0		195872	34	2020-07-13 15:49:56	2020-07-13 15:49:56	2020-07-17 12:54:26	NO001		4.51		0.982		3.534		1.502		3.014		2.531		1.985		0		0		0.632
16	CP288	86	Prod	1173	82	1003	25	NO001	NO001	World	11452	Measurements	0	7008	MEASUREMENTS	Measurements	21		52685	Skin discolouration	0		195873	35	2020-07-13 15:49:56	2020-07-13 15:49:56	2020-07-17 12:54:26	NO001		7.35		1.658		5.696		3.466		3.889		4.744		2.61		0.133		1.712		3.582
16	CP288	86	Prod	1173	82	1003	25	NO001	NO001	World	11452	Measurements	0	7008	MEASUREMENTS	Measurements	21		52685	Skin discolouration	0		195874	36	2020-07-13 15:49:56	2020-07-13 15:49:56	2020-07-17 12:54:26	NO001		15.99		0.698		15.29		0.742		15.24		0.75		15.24		0		0		0
16	CP288	86	Prod	1173	82	1003	25	NO001	NO001	World	11452	Measurements	0	7008	MEASUREMENTS	Measurements	21		52685	Skin discolouration	0		195875	37	2020-07-13 15:49:56	2020-07-13 15:49:56	2020-07-17 12:54:26	NO001		51.5		7.856		43.65		15.39		36.11		22.52		28.98		0		0		0
16	CP288	86	Prod	1173	82	1003	25	NO001	NO001	World	11452	Measurements	0	7008	MEASUREMENTS	Measurements	21		52685	Skin discolouration	0		195876	38	2020-07-13 15:49:56	2020-07-13 15:49:56	2020-07-17 12:54:26	NO001		32.9		3.137		29.76		5.927		26.97		8.76		24.14		0		0		0.001
16	CP288	86	Prod	1173	82	1003	25	NO001	NO001	World	11452	Measurements	0	7008	MEASUREMENTS	Measurements	21		52685	Skin discolouration	0		195877	39	2020-07-13 15:49:56	2020-07-13 15:49:56	2020-07-17 12:54:26	NO001		10.53		2.316		8.216		4.228		6.304		5.501		5.031		0		0.011		0.061
16	CP288	86	Prod	1173	82	1003	25	NO001	NO001	World	11452	Measurements	0	7008	MEASUREMENTS	Measurements	21		52685	Skin discolouration	0		195878	40	2020-07-13 15:49:56	2020-07-13 15:49:56	2020-07-17 12:54:26	NO001		11.85		2.803		9.053		3.798		8.058		5.414		6.442		0.056		0.162		1.084
16	CP288	86	Prod	1173	82	1003	25	NO001	NO001	World	11452	Measurements	0	7008	MEASUREMENTS	Measurements	21		52685	Skin discolouration	0		195879	41	2020-07-13 15:49:56	2020-07-13 15:49:56	2020-07-17 12:54:26	NO001		31.63		3.173		28.45		7.748		23.88		13.12		18.5		0.627		4.451		7.517
16	CP288	86	Prod	1173	82	1003	25	NO001	NO001	World	11452	Measurements	0	7008	MEASUREMENTS	Measurements	21		52685	Skin discolouration	0		195880	42	2020-07-13 15:49:56	2020-07-13 15:49:56	2020-07-17 12:54:26	NO001		8.96		2.126		6.839		2.585		6.38		3.168		5.797		0		0.015		0.471
16	CP288	86	Prod	1173	82	1003	25	NO001	NO001	World	11452	Measurements	0	7008	MEASUREMENTS	Measurements	21		52685	Skin discolouration	0		195881	43	2020-07-13 15:49:56	2020-07-13 15:49:56	2020-07-17 12:54:26	NO001		55.56		4.313		51.24		9.788		45.77		16.33		39.22		0		0		0.002
16	CP288	86	Prod	1173	82	1003	25	NO001	NO001	World	11452	Measurements	0	7008	MEASUREMENTS	Measurements	21		52685	Skin discolouration	0		195882	44	2020-07-13 15:49:56	2020-07-13 15:49:56	2020-07-17 12:54:26	NO001		20.49		0.971		19.52		1.032		19.46		1.631		18.86		0		0		0.002
16	CP288	86	Prod	1173	82	1003	25	NO001	NO001	World	11452	Measurements	0	7008	MEASUREMENTS	Measurements	21		52685	Skin discolouration	0		195883	45	2020-07-13 15:49:56	2020-07-13 15:49:56	2020-07-17 12:54:26	NO001		54.78		6.266		48.51		12.01		42.77		17.38		37.39		0		0		0
16	CP288	86	Prod	1173	82	1003	25	NO001	NO001	World	11452	Measurements	0	7008	MEASUREMENTS	Measurements	21		52685	Skin discolouration	0		195884	46	2020-07-13 15:49:56	2020-07-13 15:49:56	2020-07-17 12:54:26	NO001		23.36		3.869		19.5		8.044		15.32		12.35		11.01		0.014		0.777		3.034
16	CP288	86	Prod	1173	82	1003	25	NO001	NO001	World	11452	Measurements	0	7008	MEASUREMENTS	Measurements	21		52685	Skin discolouration	0		195885	47	2020-07-13 15:49:56	2020-07-13 15:49:56	2020-07-17 12:54:26	NO001		17.6		3.745		13.86		6.533		11.07		7.928		9.68		0		0.356		4.202
16	CP288	86	Prod	1173	82	1003	25	NO001	NO001	World	11452	Measurements	0	7008	MEASUREMENTS	Measurements	21		52685	Skin discolouration	0		195886	48	2020-07-13 15:49:56	2020-07-13 15:49:56	2020-07-17 12:54:26	NO001		44.8		2.469		42.33		4.423		40.37		7.467		37.33		0		0		0.003
16	CP288	86	Prod	1173	82	1003	25	NO001	NO001	World	11452	Measurements	0	7008	MEASUREMENTS	Measurements	21		52685	Skin discolouration	0		195887	49	2020-07-13 15:49:56	2020-07-13 15:49:56	2020-07-17 12:54:26	NO001		23.72		2.208		21.52		2.314		21.41		4.546		19.18		0.014		0.128		2.113
16	CP288	86	Prod	1173	82	1003	25	NO001	NO001	World	11452	Measurements	0	7008	MEASUREMENTS	Measurements	21		52685	Skin discolouration	0		195888	50	2020-07-13 15:49:56	2020-07-13 15:49:56	2020-07-17 12:54:26	NO001		14.8		2.446		12.35		2.689		12.11		2.735		12.07		0.114		0.255		1.331
16	CP288	86	Prod	1173	82	1003	25	NO001	NO001	World	11452	Measurements	0	7008	MEASUREMENTS	Measurements	21		52685	Skin discolouration	0		195889	51	2020-07-13 15:49:56	2020-07-13 15:49:56	2020-07-17 12:54:26	NO001		37.26		3.855		33.41		8.563		28.7		12.88		24.38		0		0.002		0.308
16	CP288	86	Prod	1173	82	1003	25	NO001	NO001	World	11452	Measurements	0	7008	MEASUREMENTS	Measurements	21		52685	Skin discolouration	0		195890	52	2020-07-13 15:49:56	2020-07-13 15:49:56	2020-07-17 12:54:26	NO001		18.02		3.314		14.7		5.776		12.24		8.104		9.918		0.767		2.276		4.043
16	CP288	86	Prod	1173	82	1003	25	NO001	NO001	World	11452	Measurements	0	7008	MEASUREMENTS	Measurements	21		52685	Skin discolouration	0		195891	53	2020-07-13 15:49:56	2020-07-13 15:49:56	2020-07-17 12:54:26	NO001		20.18		1.598		18.58		1.941		18.24		2.086		18.09		0.401		3.078		4.496
16	CP288	86	Prod	1173	82	1003	25	NO001	NO001	World	11452	Measurements	0	7008	MEASUREMENTS	Measurements	21		52685	Skin discolouration	0		195892	54	2020-07-13 15:49:56	2020-07-13 15:49:56	2020-07-17 12:54:26	NO001		35.65		2.162		33.49		4.85		30.8		9.252		26.4		0		0.049		1.013
16	CP288	86	Prod	1173	82	1003	25	NO001	NO001	World	11452	Measurements	0	7008	MEASUREMENTS	Measurements	21		52685	Skin discolouration	0		195893	55	2020-07-13 15:49:56	2020-07-13 15:49:56	2020-07-17 12:54:26	NO001		8.45		1.797		6.659		1.836		6.621		1.839		6.618		0.001		0.013		0.022
16	CP288	86	Prod	1173	82	1003	25	NO001	NO001	World	11452	Measurements	0	7008	MEASUREMENTS	Measurements	21		52685	Skin discolouration	0		195894	56	2020-07-13 15:49:56	2020-07-13 15:49:56	2020-07-17 12:54:26	NO001		16.58		3.715		12.87		5.175		11.41		5.633		10.95		0.11		1.178		3.19
16	CP288	86	Prod	1173	82	1003	25	NO001	NO001	World	11452	Measurements	0	7008	MEASUREMENTS	Measurements	21		52685	Skin discolouration	0		195895	57	2020-07-13 15:49:56	2020-07-13 15:49:56	2020-07-17 12:54:26	NO001		31.18		2.27		28.92		4.749		26.44		8.341		22.84		0		0		0
16	CP288	86	Prod	1173	82	1003	25	NO001	NO001	World	11452	Measurements	0	7008	MEASUREMENTS	Measurements	21		52685	Skin discolouration	0		195896	58	2020-07-13 15:49:56	2020-07-13 15:49:56	2020-07-17 12:54:26	NO001		5.08		0.895		4.193		1.167		3.922		2.578		2.51		0.006		0.065		0.306
16	CP288	86	Prod	1173	82	1003	25	NO001	NO001	World	11452	Measurements	0	7008	MEASUREMENTS	Measurements	21		52685	Skin discolouration	0		195897	59	2020-07-13 15:49:56	2020-07-13 15:49:56	2020-07-17 12:54:26	NO001		37.53		3.406		34.12		6.124		31.41		8.345		29.19		0		0.113		3.918
16	CP288	86	Prod	1173	82	1003	25	NO001	NO001	World	11452	Measurements	0	7008	MEASUREMENTS	Measurements	21		52685	Skin discolouration	0		195898	60	2020-07-13 15:49:56	2020-07-13 15:49:56	2020-07-17 12:54:26	NO001		11.62		2.301		9.325		5.177		6.448		7.864		3.761		0.014		0.273		1.769
16	CP288	86	Prod	1173	82	1003	25	NO001	NO001	World	11452	Measurements	0	7008	MEASUREMENTS	Measurements	21		52685	Skin discolouration	0		195899	61	2020-07-13 15:49:56	2020-07-13 15:49:56	2020-07-17 12:54:26	NO001		56.61		3.429		53.18		7.902		48.71		12.96		43.64		0		0		0
16	CP288	86	Prod	1173	82	1003	25	NO001	NO001	World	11452	Measurements	0	7008	MEASUREMENTS	Measurements	21		52685	Skin discolouration	0		195900	62	2020-07-13 15:49:56	2020-07-13 15:49:56	2020-07-17 12:54:26	NO001		74.13		5.459		68.67		11.67		62.46		18.87		55.25		0		0		0
16	CP288	86	Prod	1173	82	1003	25	NO001	NO001	World	11452	Measurements	0	7008	MEASUREMENTS	Measurements	21		52685	Skin discolouration	0		195901	63	2020-07-13 15:49:56	2020-07-13 15:49:56	2020-07-17 12:54:26	NO001		42.55		3.814		38.74		6.939		35.62		10.7		31.85		0		0		0
16	CP288	86	Prod	1173	82	1003	25	NO001	NO001	World	11452	Measurements	0	7008	MEASUREMENTS	Measurements	21		52685	Skin discolouration	0		195902	64	2020-07-13 15:49:56	2020-07-13 15:49:56	2020-07-17 12:54:26	NO001		48.23		5.397		42.83		10.75		37.47		16.56		31.66		0		0		0.001
16	CP288	86	Prod	1173	82	1003	25	NO001	NO001	World	11452	Measurements	0	7008	MEASUREMENTS	Measurements	21		52685	Skin discolouration	0		195903	65	2020-07-13 15:49:56	2020-07-13 15:49:56	2020-07-17 12:54:26	NO001		8.28		1.22		7.066		2.346		5.94		3.441		4.845		0.062		0.496		1.602
16	CP288	86	Prod	1173	82	1003	25	NO001	NO001	World	11452	Measurements	0	7008	MEASUREMENTS	Measurements	21		52685	Skin discolouration	0		195904	66	2020-07-13 15:49:56	2020-07-13 15:49:56	2020-07-17 12:54:26	NO001		17.25		1.838		15.41		2.036		15.22		3.591		13.66		0.185		1.633		1.85
16	CP288	86	Prod	1173	82	1003	25	NO001	NO001	World	11452	Measurements	0	7008	MEASUREMENTS	Measurements	21		52685	Skin discolouration	0		195905	67	2020-07-13 15:49:56	2020-07-13 15:49:56	2020-07-17 12:54:26	NO001		3.89		2.414		1.485		2.435		1.464		2.628		1.271		0.095		0.251		1.14
16	CP288	86	Prod	1173	82	1003	25	NO001	NO001	World	11452	Measurements	0	7008	MEASUREMENTS	Measurements	21		52685	Skin discolouration	0		195906	68	2020-07-13 15:49:56	2020-07-13 15:49:56	2020-07-17 12:54:26	NO001		51.65		4.353		47.3		10.21		41.44		17.38		34.27		0		0		0
16	CP288	86	Prod	1173	82	1003	25	NO001	NO001	World	11452	Measurements	0	7008	MEASUREMENTS	Measurements	21		52685	Skin discolouration	0		195907	69	2020-07-13 15:49:56	2020-07-13 15:49:56	2020-07-17 12:54:26	NO001		34.75		3.448		31.3		6.122		28.63		8.725		26.03		0		0		0
16	CP288	86	Prod	1173	82	1003	25	NO001	NO001	World	11452	Measurements	0	7008	MEASUREMENTS	Measurements	21		52685	Skin discolouration	0		195908	70	2020-07-13 15:49:56	2020-07-13 15:49:56	2020-07-17 12:54:26	NO001		44.06		4.044		40.02		7.275		36.79		11.07		33		0		0		0
16	CP288	86	Prod	1173	82	1003	25	NO001	NO001	World	11452	Measurements	0	7008	MEASUREMENTS	Measurements	21		52685	Skin discolouration	0		195909	71	2020-07-13 15:49:56	2020-07-13 15:49:56	2020-07-17 12:54:26	NO001		8.06		0.67		7.396		1.605		6.461		3.396		4.669		0		0.074		0.168
16	CP288	86	Prod	1173	82	1003	25	NO001	NO001	World	11452	Measurements	0	7008	MEASUREMENTS	Measurements	21		52685	Skin discolouration	0		195910	72	2020-07-13 15:49:56	2020-07-13 15:49:56	2020-07-17 12:54:26	NO001		7.38		1.561		5.825		1.655		5.73		1.685		5.701		0		0.007		0.083
16	CP288	86	Prod	1173	82	1003	25	NO001	NO001	World	11452	Measurements	0	7008	MEASUREMENTS	Measurements	21		52685	Skin discolouration	0		195911	73	2020-07-13 15:49:56	2020-07-13 15:49:56	2020-07-17 12:54:26	NO001		4.9		3.809		1.095		4.668		0.237		4.68		0.225		0		0		0
16	CP288	86	Prod	1174	82	1004	25	NO001	NO001	World	11483	Measurements	0	7008	MEASUREMENTS	Measurements	21		52745	Skin discolouration	0		137911	1	2020-07-13 15:50:08	2020-07-13 15:50:08	2020-07-17 12:54:26	NO001		27.36		7.638		19.73		15.08		12.28		18.99		8.377		0.266		1.892		8.367
16	CP288	86	Prod	1174	82	1004	25	NO001	NO001	World	11483	Measurements	0	7008	MEASUREMENTS	Measurements	21		52745	Skin discolouration	0		196096	2	2020-07-13 15:50:08	2020-07-13 15:50:08	2020-07-17 12:54:26	NO001		18.19		9.419		8.771		16		2.181		18.04		0.15		1.542		3.032		4.75
16	CP288	86	Prod	1174	82	1004	25	NO001	NO001	World	11483	Measurements	0	7008	MEASUREMENTS	Measurements	21		52745	Skin discolouration	0		196097	3	2020-07-13 15:50:08	2020-07-13 15:50:08	2020-07-17 12:54:26	NO001		28.18		6.742		21.44		11.67		16.51		14.18		14		0		1.924		5.239
16	CP288	86	Prod	1174	82	1004	25	NO001	NO001	World	11483	Measurements	0	7008	MEASUREMENTS	Measurements	21		52745	Skin discolouration	0		196098	4	2020-07-13 15:50:08	2020-07-13 15:50:08	2020-07-17 12:54:26	NO001		26.84		10.29		16.54		16.95		9.891		20.07		6.766		2.142		2.099		7.249
16	CP288	86	Prod	1174	82	1004	25	NO001	NO001	World	11483	Measurements	0	7008	MEASUREMENTS	Measurements	21		52745	Skin discolouration	0		196099	5	2020-07-13 15:50:08	2020-07-13 15:50:08	2020-07-17 12:54:26	NO001		76.58		13.42		63.15		24.87		51.71		35.64		40.94		0		0		0
16	CP288	86	Prod	1174	82	1004	25	NO001	NO001	World	11483	Measurements	0	7008	MEASUREMENTS	Measurements	21		52745	Skin discolouration	0		196100	6	2020-07-13 15:50:08	2020-07-13 15:50:08	2020-07-17 12:54:26	NO001		20.17		5.503		14.67		11.22		8.95		12.8		7.376		1.279		4.595		13.13
16	CP288	86	Prod	1174	82	1004	25	NO001	NO001	World	11483	Measurements	0	7008	MEASUREMENTS	Measurements	21		52745	Skin discolouration	0		196101	7	2020-07-13 15:50:08	2020-07-13 15:50:08	2020-07-17 12:54:26	NO001		39.22		10.04		29.17		17.01		22.2		23.16		16.05		0		0.011		1.633
16	CP288	86	Prod	1174	82	1004	25	NO001	NO001	World	11483	Measurements	0	7008	MEASUREMENTS	Measurements	21		52745	Skin discolouration	0		196102	8	2020-07-13 15:50:08	2020-07-13 15:50:08	2020-07-17 12:54:26	NO001		13.65		7.229		6.422		10.06		3.589		11.39		2.259		2.746		3.599		1.619
16	CP288	86	Prod	1174	82	1004	25	NO001	NO001	World	11483	Measurements	0	7008	MEASUREMENTS	Measurements	21		52745	Skin discolouration	0		196103	9	2020-07-13 15:50:08	2020-07-13 15:50:08	2020-07-17 12:54:26	NO001		21.69		9.892		11.8		16.26		5.432		17.96		3.739		0.735		3.21		6.705
16	CP288	86	Prod	1174	82	1004	25	NO001	NO001	World	11483	Measurements	0	7008	MEASUREMENTS	Measurements	21		52745	Skin discolouration	0		196104	10	2020-07-13 15:50:08	2020-07-13 15:50:08	2020-07-17 12:54:26	NO001		15.56		6.235		9.334		11.21		4.359		14.02		1.546		2.188		3.43		6.083
16	CP288	86	Prod	1174	82	1004	25	NO001	NO001	World	11483	Measurements	0	7008	MEASUREMENTS	Measurements	21		52745	Skin discolouration	0		196105	11	2020-07-13 15:50:08	2020-07-13 15:50:08	2020-07-17 12:54:26	NO001		45.55		10.76		34.78		17.99		27.56		23.08		22.46		0		0		0.063
16	CP288	86	Prod	1174	82	1004	25	NO001	NO001	World	11483	Measurements	0	7008	MEASUREMENTS	Measurements	21		52745	Skin discolouration	0		196106	12	2020-07-13 15:50:08	2020-07-13 15:50:08	2020-07-17 12:54:26	NO001		45.86		10.88		34.98		18.96		26.9		24.88		20.97		0		0		0
16	CP288	86	Prod	1174	82	1004	25	NO001	NO001	World	11483	Measurements	0	7008	MEASUREMENTS	Measurements	21		52745	Skin discolouration	0		196107	13	2020-07-13 15:50:08	2020-07-13 15:50:08	2020-07-17 12:54:26	NO001		10.2		5.063		5.146		7.356		2.853		7.952		2.257		1.531		2.494		2.938
16	CP288	86	Prod	1174	82	1004	25	NO001	NO001	World	11483	Measurements	0	7008	MEASUREMENTS	Measurements	21		52745	Skin discolouration	0		196108	14	2020-07-13 15:50:08	2020-07-13 15:50:08	2020-07-17 12:54:26	NO001		29.82		9.11		20.71		17.09		12.72		22.63		7.188		3.342		10.09		11.93
16	CP288	86	Prod	1174	82	1004	25	NO001	NO001	World	11483	Measurements	0	7008	MEASUREMENTS	Measurements	21		52745	Skin discolouration	0		196109	15	2020-07-13 15:50:08	2020-07-13 15:50:08	2020-07-17 12:54:26	NO001		35.11		8.131		26.98		14.49		20.62		18.18		16.92		0		0		0
16	CP288	86	Prod	1174	82	1004	25	NO001	NO001	World	11483	Measurements	0	7008	MEASUREMENTS	Measurements	21		52745	Skin discolouration	0		196110	16	2020-07-13 15:50:08	2020-07-13 15:50:08	2020-07-17 12:54:26	NO001		15.11		7.92		7.198		13.45		1.667		14.92		0.195		1.28		2.282		3.553
16	CP288	86	Prod	1174	82	1004	25	NO001	NO001	World	11483	Measurements	0	7008	MEASUREMENTS	Measurements	21		52745	Skin discolouration	0		196111	17	2020-07-13 15:50:08	2020-07-13 15:50:08	2020-07-17 12:54:26	NO001		36.56		10.2		26.36		18.86		17.7		24.05		12.51		0.856		4.968		8.505
16	CP288	86	Prod	1174	82	1004	25	NO001	NO001	World	11483	Measurements	0	7008	MEASUREMENTS	Measurements	21		52745	Skin discolouration	0		196112	18	2020-07-13 15:50:08	2020-07-13 15:50:08	2020-07-17 12:54:26	NO001		38.29		7.273		31.02		14.24		24.04		20.32		17.97		0		1.081		10.25
16	CP288	86	Prod	1174	82	1004	25	NO001	NO001	World	11483	Measurements	0	7008	MEASUREMENTS	Measurements	21		52745	Skin discolouration	0		196113	19	2020-07-13 15:50:08	2020-07-13 15:50:08	2020-07-17 12:54:26	NO001		13.7		7.209		6.494		12.64		1.054		13.7		0.003		0.522		1.833		8.308
16	CP288	86	Prod	1174	82	1004	25	NO001	NO001	World	11483	Measurements	0	7008	MEASUREMENTS	Measurements	21		52745	Skin discolouration	0		196114	20	2020-07-13 15:50:08	2020-07-13 15:50:08	2020-07-17 12:54:26	NO001		10.86		5.001		5.859		8.221		2.64		9.921		0.939		2.03		2.205		2.656
16	CP288	86	Prod	1174	82	1004	25	NO001	NO001	World	11483	Measurements	0	7008	MEASUREMENTS	Measurements	21		52745	Skin discolouration	0		196115	21	2020-07-13 15:50:08	2020-07-13 15:50:08	2020-07-17 12:54:26	NO001		23.12		7.644		15.48		14.3		8.823		17.42		5.706		4.898		7.3		6.027
16	CP288	86	Prod	1174	82	1004	25	NO001	NO001	World	11483	Measurements	0	7008	MEASUREMENTS	Measurements	21		52745	Skin discolouration	0		196116	22	2020-07-13 15:50:08	2020-07-13 15:50:08	2020-07-17 12:54:26	NO001		83.5		11.87		71.62		22.39		61.11		33.65		49.84		0		0		0.065
16	CP288	86	Prod	1174	82	1004	25	NO001	NO001	World	11483	Measurements	0	7008	MEASUREMENTS	Measurements	21		52745	Skin discolouration	0		196117	23	2020-07-13 15:50:08	2020-07-13 15:50:08	2020-07-17 12:54:26	NO001		31.1		9.209		21.89		17.68		13.41		22.91		8.191		0		0.11		1.62
16	CP288	86	Prod	1174	82	1004	25	NO001	NO001	World	11483	Measurements	0	7008	MEASUREMENTS	Measurements	21		52745	Skin discolouration	0		196118	24	2020-07-13 15:50:08	2020-07-13 15:50:08	2020-07-17 12:54:26	NO001		13.09		7.659		5.431		12.22		0.87		13.08		0.009		0.513		2.335		3.596
16	CP288	86	Prod	1174	82	1004	25	NO001	NO001	World	11483	Measurements	0	7008	MEASUREMENTS	Measurements	21		52745	Skin discolouration	0		196119	25	2020-07-13 15:50:08	2020-07-13 15:50:08	2020-07-17 12:54:26	NO001		16.05		8.417		7.641		10.94		5.115		11.69		4.365		0.929		2.436		4.499
16	CP288	86	Prod	1174	82	1004	25	NO001	NO001	World	11483	Measurements	0	7008	MEASUREMENTS	Measurements	21		52745	Skin discolouration	0		196120	26	2020-07-13 15:50:08	2020-07-13 15:50:08	2020-07-17 12:54:26	NO001		20.38		9.888		10.49		15.38		4.996		17.94		2.439		1.058		3.062		5.447
16	CP288	86	Prod	1174	82	1004	25	NO001	NO001	World	11483	Measurements	0	7008	MEASUREMENTS	Measurements	21		52745	Skin discolouration	0		196121	27	2020-07-13 15:50:08	2020-07-13 15:50:08	2020-07-17 12:54:26	NO001		23.73		9.065		14.66		17.66		6.068		21.34		2.389		5.055		7.234		5.05
16	CP288	86	Prod	1174	82	1004	25	NO001	NO001	World	11483	Measurements	0	7008	MEASUREMENTS	Measurements	21		52745	Skin discolouration	0		196122	28	2020-07-13 15:50:08	2020-07-13 15:50:08	2020-07-17 12:54:26	NO001		52.58		11.15		41.42		21.29		31.29		29.76		22.81		0		0		0
16	CP288	86	Prod	1174	82	1004	25	NO001	NO001	World	11483	Measurements	0	7008	MEASUREMENTS	Measurements	21		52745	Skin discolouration	0		196123	29	2020-07-13 15:50:08	2020-07-13 15:50:08	2020-07-17 12:54:26	NO001		22.09		8.55		13.54		16.17		5.918		20.73		1.362		1.858		4.725		8.456
16	CP288	86	Prod	1174	82	1004	25	NO001	NO001	World	11483	Measurements	0	7008	MEASUREMENTS	Measurements	21		52745	Skin discolouration	0		196124	30	2020-07-13 15:50:08	2020-07-13 15:50:08	2020-07-17 12:54:26	NO001		72.84		12.99		59.84		23.38		49.46		32.22		40.61		0		0		0.097
16	CP288	86	Prod	1174	82	1004	25	NO001	NO001	World	11483	Measurements	0	7008	MEASUREMENTS	Measurements	21		52745	Skin discolouration	0		196125	31	2020-07-13 15:50:08	2020-07-13 15:50:08	2020-07-17 12:54:26	NO001		14.39		6.045		8.35		11.08		3.311		13.2		1.186		3.469		3.507		3.93
16	CP288	86	Prod	1174	82	1004	25	NO001	NO001	World	11483	Measurements	0	7008	MEASUREMENTS	Measurements	21		52745	Skin discolouration	0		196126	32	2020-07-13 15:50:08	2020-07-13 15:50:08	2020-07-17 12:54:26	NO001		31.73		7.903		23.83		15.63		16.1		23.76		7.971		0		0		0
16	CP288	86	Prod	1174	82	1004	25	NO001	NO001	World	11483	Measurements	0	7008	MEASUREMENTS	Measurements	21		52745	Skin discolouration	0		196127	33	2020-07-13 15:50:08	2020-07-13 15:50:08	2020-07-17 12:54:26	NO001		17.66		7.722		9.941		13.13		4.532		15.83		1.827		0.251		1.305		3.892
16	CP288	86	Prod	1174	82	1004	25	NO001	NO001	World	11483	Measurements	0	7008	MEASUREMENTS	Measurements	21		52745	Skin discolouration	0		196128	34	2020-07-13 15:50:08	2020-07-13 15:50:08	2020-07-17 12:54:26	NO001		35.05		8.908		26.14		16.92		18.12		23.18		11.86		0		0.073		3.68
16	CP288	86	Prod	1174	82	1004	25	NO001	NO001	World	11483	Measurements	0	7008	MEASUREMENTS	Measurements	21		52745	Skin discolouration	0		196129	35	2020-07-13 15:50:08	2020-07-13 15:50:08	2020-07-17 12:54:26	NO001		21.35		7.947		13.4		15.46		5.888		18.52		2.832		2.878		6.932		7.267
16	CP288	86	Prod	1174	82	1004	25	NO001	NO001	World	11483	Measurements	0	7008	MEASUREMENTS	Measurements	21		52745	Skin discolouration	0		196130	36	2020-07-13 15:50:08	2020-07-13 15:50:08	2020-07-17 12:54:26	NO001		62.52		12.88		49.64		23.17		39.35		32.59		29.93		0		0		0
16	CP288	86	Prod	1174	82	1004	25	NO001	NO001	World	11483	Measurements	0	7008	MEASUREMENTS	Measurements	21		52745	Skin discolouration	0		196131	37	2020-07-13 15:50:08	2020-07-13 15:50:08	2020-07-17 12:54:26	NO001		23.88		8.497		15.38		14.68		9.204		17.15		6.735		0		0.435		6.799
16	CP288	86	Prod	1174	82	1004	25	NO001	NO001	World	11483	Measurements	0	7008	MEASUREMENTS	Measurements	21		52745	Skin discolouration	0		196132	38	2020-07-13 15:50:08	2020-07-13 15:50:08	2020-07-17 12:54:26	NO001		24.5		6.655		17.85		13.11		11.39		16.98		7.522		2.343		5.064		5.858
16	CP288	86	Prod	1174	82	1004	25	NO001	NO001	World	11483	Measurements	0	7008	MEASUREMENTS	Measurements	21		52745	Skin discolouration	0		196133	39	2020-07-13 15:50:08	2020-07-13 15:50:08	2020-07-17 12:54:26	NO001		22.52		8.001		14.52		14.3		8.221		17.74		4.779		0		0.197		4.436
16	CP288	86	Prod	1174	82	1004	25	NO001	NO001	World	11483	Measurements	0	7008	MEASUREMENTS	Measurements	21		52745	Skin discolouration	0		196134	40	2020-07-13 15:50:08	2020-07-13 15:50:08	2020-07-17 12:54:26	NO001		79.93		15.22		64.71		27.52		52.41		39.68		40.25		0		0		0
16	CP288	86	Prod	1174	82	1004	25	NO001	NO001	World	11483	Measurements	0	7008	MEASUREMENTS	Measurements	21		52745	Skin discolouration	0		196135	41	2020-07-13 15:50:08	2020-07-13 15:50:08	2020-07-17 12:54:26	NO001		12.56		7.691		4.876		11.63		0.932		12.36		0.2		0.267		1.577		3.259
16	CP288	86	Prod	1174	82	1004	25	NO001	NO001	World	11483	Measurements	0	7008	MEASUREMENTS	Measurements	21		52745	Skin discolouration	0		196136	42	2020-07-13 15:50:08	2020-07-13 15:50:08	2020-07-17 12:54:26	NO001		26.78		9.35		17.43		17.69		9.097		22.41		4.378		0.251		3.254		9.037
16	CP288	86	Prod	1174	82	1004	25	NO001	NO001	World	11483	Measurements	0	7008	MEASUREMENTS	Measurements	21		52745	Skin discolouration	0		196137	43	2020-07-13 15:50:08	2020-07-13 15:50:08	2020-07-17 12:54:26	NO001		48.29		10.45		37.84		20.24		28.05		26.91		21.38		0		0.436		7.949
16	CP288	86	Prod	1174	82	1004	25	NO001	NO001	World	11483	Measurements	0	7008	MEASUREMENTS	Measurements	21		52745	Skin discolouration	0		196138	44	2020-07-13 15:50:08	2020-07-13 15:50:08	2020-07-17 12:54:26	NO001		12.55		7.156		5.398		10.7		1.846		11.36		1.185		0.214		1.742		3.554
16	CP288	86	Prod	1174	82	1004	25	NO001	NO001	World	11483	Measurements	0	7008	MEASUREMENTS	Measurements	21		52745	Skin discolouration	0		196139	45	2020-07-13 15:50:08	2020-07-13 15:50:08	2020-07-17 12:54:26	NO001		24.06		8.54		15.52		15.32		8.735		18.86		5.201		4.495		3.78		5.647
16	CP288	86	Prod	1174	82	1004	25	NO001	NO001	World	11483	Measurements	0	7008	MEASUREMENTS	Measurements	21		52745	Skin discolouration	0		196140	46	2020-07-13 15:50:08	2020-07-13 15:50:08	2020-07-17 12:54:26	NO001		34.88		9.395		25.48		16.46		18.41		19.77		15.1		0		0		0.496
16	CP288	86	Prod	1174	82	1004	25	NO001	NO001	World	11483	Measurements	0	7008	MEASUREMENTS	Measurements	21		52745	Skin discolouration	0		196141	47	2020-07-13 15:50:08	2020-07-13 15:50:08	2020-07-17 12:54:26	NO001		14.85		8.712		6.138		12.37		2.48		13.73		1.112		0		0		0
16	CP288	86	Prod	1174	82	1004	25	NO001	NO001	World	11483	Measurements	0	7008	MEASUREMENTS	Measurements	21		52745	Skin discolouration	0		196142	48	2020-07-13 15:50:08	2020-07-13 15:50:08	2020-07-17 12:54:26	NO001		17.18		9.143		8.045		14.8		2.387		16.01		1.176		0.113		0.486		2.037
16	CP288	86	Prod	1174	82	1004	25	NO001	NO001	World	11483	Measurements	0	7008	MEASUREMENTS	Measurements	21		52745	Skin discolouration	0		196143	49	2020-07-13 15:50:08	2020-07-13 15:50:08	2020-07-17 12:54:26	NO001		10.02		5.523		4.498		8.324		1.697		9.263		0.759		0.207		1.526		3.994
16	CP288	86	Prod	1174	82	1004	25	NO001	NO001	World	11483	Measurements	0	7008	MEASUREMENTS	Measurements	21		52745	Skin discolouration	0		196144	50	2020-07-13 15:50:08	2020-07-13 15:50:08	2020-07-17 12:54:26	NO001		20.24		8.472		11.77		14.57		5.677		17.99		2.25		0.003		0.419		2.443
16	CP288	86	Prod	1174	82	1004	25	NO001	NO001	World	11483	Measurements	0	7008	MEASUREMENTS	Measurements	21		52745	Skin discolouration	0		196145	51	2020-07-13 15:50:08	2020-07-13 15:50:08	2020-07-17 12:54:26	NO001		23.79		6.606		17.18		11.65		12.13		14.57		9.216		3.27		7.264		6.945
16	CP288	86	Prod	1174	82	1004	25	NO001	NO001	World	11483	Measurements	0	7008	MEASUREMENTS	Measurements	21		52745	Skin discolouration	0		196146	52	2020-07-13 15:50:08	2020-07-13 15:50:08	2020-07-17 12:54:26	NO001		21.96		8.502		13.45		15.32		6.64		18.92		3.031		0		0.134		1.584
16	CP288	86	Prod	1174	82	1004	25	NO001	NO001	World	11483	Measurements	0	7008	MEASUREMENTS	Measurements	21		52745	Skin discolouration	0		196147	53	2020-07-13 15:50:08	2020-07-13 15:50:08	2020-07-17 12:54:26	NO001		31.18		9.677		21.5		17.23		13.95		20.67		10.5		0		0		0.085
16	CP288	86	Prod	1174	82	1004	25	NO001	NO001	World	11483	Measurements	0	7008	MEASUREMENTS	Measurements	21		52745	Skin discolouration	0		196148	54	2020-07-13 15:50:08	2020-07-13 15:50:08	2020-07-17 12:54:26	NO001		45.29		12.55		32.73		22.36		22.92		30.2		15.09		0		0		0.002
16	CP288	86	Prod	1174	82	1004	25	NO001	NO001	World	11483	Measurements	0	7008	MEASUREMENTS	Measurements	21		52745	Skin discolouration	0		196149	55	2020-07-13 15:50:08	2020-07-13 15:50:08	2020-07-17 12:54:26	NO001		26.55		6.471		20.08		12.8		13.75		16.78		9.774		6.982		10.76		5.338
16	CP288	86	Prod	1174	82	1004	25	NO001	NO001	World	11483	Measurements	0	7008	MEASUREMENTS	Measurements	21		52745	Skin discolouration	0		196150	56	2020-07-13 15:50:08	2020-07-13 15:50:08	2020-07-17 12:54:26	NO001		21.88		6.491		15.39		13.63		8.249		17.77		4.105		3.377		9.284		5.555
16	CP288	86	Prod	1174	82	1004	25	NO001	NO001	World	11483	Measurements	0	7008	MEASUREMENTS	Measurements	21		52745	Skin discolouration	0		196151	57	2020-07-13 15:50:08	2020-07-13 15:50:08	2020-07-17 12:54:26	NO001		66.53		10.72		55.81		20.47		46.05		29.49		37.03		0		0.03		5.846
16	CP288	86	Prod	1174	82	1004	25	NO001	NO001	World	11483	Measurements	0	7008	MEASUREMENTS	Measurements	21		52745	Skin discolouration	0		196152	58	2020-07-13 15:50:08	2020-07-13 15:50:08	2020-07-17 12:54:26	NO001		22.33		8.715		13.62		15.8		6.535		20.33		2.008		0.034		1.604		8.746
16	CP288	86	Prod	1174	82	1004	25	NO001	NO001	World	11483	Measurements	0	7008	MEASUREMENTS	Measurements	21		52745	Skin discolouration	0		196153	59	2020-07-13 15:50:08	2020-07-13 15:50:08	2020-07-17 12:54:26	NO001		16.15		6.302		9.853		10.92		5.234		13.68		2.474		4.063		7.524		3.369
16	CP288	86	Prod	1174	82	1004	25	NO001	NO001	World	11483	Measurements	0	7008	MEASUREMENTS	Measurements	21		52745	Skin discolouration	0		196154	60	2020-07-13 15:50:08	2020-07-13 15:50:08	2020-07-17 12:54:26	NO001		23.32		8.003		15.32		14.57		8.756		18.03		5.296		0		0		0.937
16	CP288	86	Prod	1174	82	1004	25	NO001	NO001	World	11483	Measurements	0	7008	MEASUREMENTS	Measurements	21		52745	Skin discolouration	0		196155	61	2020-07-13 15:50:08	2020-07-13 15:50:08	2020-07-17 12:54:26	NO001		11.08		5.682		5.408		8.953		2.137		10.55		0.539		3.719		3.952		1.797
16	CP288	86	Prod	1174	82	1004	25	NO001	NO001	World	11483	Measurements	0	7008	MEASUREMENTS	Measurements	21		52745	Skin discolouration	0		196156	62	2020-07-13 15:50:08	2020-07-13 15:50:08	2020-07-17 12:54:26	NO001		29.09		8.207		20.89		16.71		12.37		21.05		8.043		0.226		3.248		9.637
16	CP288	86	Prod	1174	82	1004	25	NO001	NO001	World	11483	Measurements	0	7008	MEASUREMENTS	Measurements	21		52745	Skin discolouration	0		196157	63	2020-07-13 15:50:08	2020-07-13 15:50:08	2020-07-17 12:54:26	NO001		79.5		11.51		67.99		20.16		59.34		27.85		51.65		0		0		0.042
16	CP288	86	Prod	1174	82	1004	25	NO001	NO001	World	11483	Measurements	0	7008	MEASUREMENTS	Measurements	21		52745	Skin discolouration	0		196158	64	2020-07-13 15:50:08	2020-07-13 15:50:08	2020-07-17 12:54:26	NO001		37.91		7.34		30.57		14.83		23.07		21.16		16.75		0.266		6.668		10
16	CP288	86	Prod	1174	82	1004	25	NO001	NO001	World	11483	Measurements	0	7008	MEASUREMENTS	Measurements	21		52745	Skin discolouration	0		196159	65	2020-07-13 15:50:08	2020-07-13 15:50:08	2020-07-17 12:54:26	NO001		36.44		11.67		24.77		18.58		17.87		22.88		13.56		0		0		0.062
16	CP288	86	Prod	1174	82	1004	25	NO001	NO001	World	11483	Measurements	0	7008	MEASUREMENTS	Measurements	21		52745	Skin discolouration	0		196160	66	2020-07-13 15:50:08	2020-07-13 15:50:08	2020-07-17 12:54:26	NO001		31.68		7.817		23.86		14.42		17.26		18.21		13.47		8.353		7.251		8.434
16	CP288	86	Prod	1174	82	1004	25	NO001	NO001	World	11483	Measurements	0	7008	MEASUREMENTS	Measurements	21		52745	Skin discolouration	0		196161	67	2020-07-13 15:50:08	2020-07-13 15:50:08	2020-07-17 12:54:26	NO001		31.37		8.771		22.59		15.2		16.16		19.62		11.74		0.492		5.644		10.43
16	CP288	86	Prod	1174	82	1004	25	NO001	NO001	World	11483	Measurements	0	7008	MEASUREMENTS	Measurements	21		52745	Skin discolouration	0		196162	68	2020-07-13 15:50:08	2020-07-13 15:50:08	2020-07-17 12:54:26	NO001		18		7.267		10.74		11.93		6.068		13.86		4.141		0.343		1.6		3.608
16	CP288	86	Prod	1174	82	1004	25	NO001	NO001	World	11483	Measurements	0	7008	MEASUREMENTS	Measurements	21		52745	Skin discolouration	0		196163	69	2020-07-13 15:50:08	2020-07-13 15:50:08	2020-07-17 12:54:26	NO001		17.06		6.429		10.63		10.97		6.086		14.03		3.03		0.045		0.254		1.034
16	CP288	86	Prod	1174	82	1004	25	NO001	NO001	World	11483	Measurements	0	7008	MEASUREMENTS	Measurements	21		52745	Skin discolouration	0		196164	70	2020-07-13 15:50:08	2020-07-13 15:50:08	2020-07-17 12:54:26	NO001		22.4		8.841		13.56		17.64		4.766		21.37		1.037		0.206		1.35		5.025
16	CP288	86	Prod	1174	82	1004	25	NO001	NO001	World	11483	Measurements	0	7008	MEASUREMENTS	Measurements	21		52745	Skin discolouration	0		196165	71	2020-07-13 15:50:08	2020-07-13 15:50:08	2020-07-17 12:54:26	NO001		22.24		7.762		14.48		13.5		8.741		15.5		6.745		1.87		4.925		7.353
16	CP288	86	Prod	1174	82	1004	25	NO001	NO001	World	11483	Measurements	0	7008	MEASUREMENTS	Measurements	21		52745	Skin discolouration	0		196166	72	2020-07-13 15:50:08	2020-07-13 15:50:08	2020-07-17 12:54:26	NO001		21.66		6.697		14.97		13.61		8.051		18.12		3.543		1.836		7.519		6.578
16	CP288	86	Prod	1174	82	1004	25	NO001	NO001	World	11483	Measurements	0	7008	MEASUREMENTS	Measurements	21		52745	Skin discolouration	0		196167	73	2020-07-13 15:50:08	2020-07-13 15:50:08	2020-07-17 12:54:26	NO001		19.89		7.211		12.68		11.98		7.915		14.62		5.274		0.356		2.76		8.854
16	CP288	86	Prod	1174	82	1004	25	NO001	NO001	World	11483	Measurements	0	7008	MEASUREMENTS	Measurements	21		52745	Skin discolouration	0		196168	74	2020-07-13 15:50:08	2020-07-13 15:50:08	2020-07-17 12:54:26	NO001		14.92		8.429		6.495		12.32		2.597		13.04		1.882		0.966		2.256		4.558
16	CP288	86	Prod	1174	82	1004	25	NO001	NO001	World	11483	Measurements	0	7008	MEASUREMENTS	Measurements	21		52745	Skin discolouration	0		196169	75	2020-07-13 15:50:08	2020-07-13 15:50:08	2020-07-17 12:54:26	NO001		30.45		6.651		23.8		13.82		16.63		20.19		10.26		4.61		8.079		22.3
16	CP288	86	Prod	1174	82	1004	25	NO001	NO001	World	11483	Measurements	0	7008	MEASUREMENTS	Measurements	21		52745	Skin discolouration	0		196170	76	2020-07-13 15:50:08	2020-07-13 15:50:08	2020-07-17 12:54:26	NO001		34.33		7.505		26.83		14.82		19.51		19.39		14.94		0.182		1.983		5.865
16	CP288	86	Prod	1174	82	1004	25	NO001	NO001	World	11483	Measurements	0	7008	MEASUREMENTS	Measurements	21		52745	Skin discolouration	0		196171	77	2020-07-13 15:50:08	2020-07-13 15:50:08	2020-07-17 12:54:26	NO001		22.66		6.815		15.84		13.2		9.458		18.06		4.603		0		0.244		5.487
16	CP288	86	Prod	1174	82	1004	25	NO001	NO001	World	11483	Measurements	0	7008	MEASUREMENTS	Measurements	21		52745	Skin discolouration	0		196172	78	2020-07-13 15:50:08	2020-07-13 15:50:08	2020-07-17 12:54:26	NO001		23.19		7.724		15.46		14.39		8.793		17.81		5.38		0.097		2.414		5.394
16	CP288	86	Prod	1174	82	1004	25	NO001	NO001	World	11483	Measurements	0	7008	MEASUREMENTS	Measurements	21		52745	Skin discolouration	0		196173	79	2020-07-13 15:50:08	2020-07-13 15:50:08	2020-07-17 12:54:26	NO001		57.79		10.62		47.17		18.82		38.97		26.41		31.38		0		0		0.003
16	CP288	86	Prod	1174	82	1004	25	NO001	NO001	World	11483	Measurements	0	7008	MEASUREMENTS	Measurements	21		52745	Skin discolouration	0		196174	80	2020-07-13 15:50:08	2020-07-13 15:50:08	2020-07-17 12:54:26	NO001		19.75		6.782		12.97		12.31		7.446		15.38		4.377		2.54		4.706		6.045
16	CP288	86	Prod	1174	82	1004	25	NO001	NO001	World	11483	Measurements	0	7008	MEASUREMENTS	Measurements	21		52745	Skin discolouration	0		196175	81	2020-07-13 15:50:08	2020-07-13 15:50:08	2020-07-17 12:54:26	NO001		46.99		10.33		36.65		18.43		28.56		24.23		22.76		0		0		0
16	CP288	86	Prod	1174	82	1004	25	NO001	NO001	World	11483	Measurements	0	7008	MEASUREMENTS	Measurements	21		52745	Skin discolouration	0		196176	82	2020-07-13 15:50:08	2020-07-13 15:50:08	2020-07-17 12:54:26	NO001		9.98		6.016		3.966		8.971		1.011		9.937		0.046		0.322		0.596		1.897
16	CP288	86	Prod	1174	82	1004	25	NO001	NO001	World	11483	Measurements	0	7008	MEASUREMENTS	Measurements	21		52745	Skin discolouration	0		196177	83	2020-07-13 15:50:08	2020-07-13 15:50:08	2020-07-17 12:54:26	NO001		27.23		10.57		16.66		18.04		9.198		21.32		5.909		0.037		1.767		4.539
16	CP288	86	Prod	1174	82	1004	25	NO001	NO001	World	11483	Measurements	0	7008	MEASUREMENTS	Measurements	21		52745	Skin discolouration	0		196178	84	2020-07-13 15:50:08	2020-07-13 15:50:08	2020-07-17 12:54:26	NO001		24.35		7.184		17.17		12.76		11.59		16.28		8.074		6.493		9.134		5.977
16	CP288	86	Prod	1174	82	1004	25	NO001	NO001	World	11483	Measurements	0	7008	MEASUREMENTS	Measurements	21		52745	Skin discolouration	0		196179	85	2020-07-13 15:50:08	2020-07-13 15:50:08	2020-07-17 12:54:26	NO001		22.87		8.235		14.64		14.9		7.968		17.82		5.053		2.811		8.887		5.104
16	CP288	86	Prod	1174	82	1004	25	NO001	NO001	World	11483	Measurements	0	7008	MEASUREMENTS	Measurements	21		52745	Skin discolouration	0		196180	86	2020-07-13 15:50:08	2020-07-13 15:50:08	2020-07-17 12:54:26	NO001		19.94		8.656		11.29		14.7		5.239		18.11		1.834		3.974		3.509		5.325
16	CP288	86	Prod	1174	82	1004	25	NO001	NO001	World	11483	Measurements	0	7008	MEASUREMENTS	Measurements	21		52745	Skin discolouration	0		196181	87	2020-07-13 15:50:08	2020-07-13 15:50:08	2020-07-17 12:54:26	NO001		23.36		7.106		16.25		11.9		11.45		15.23		8.127		2.805		7.36		6.451
16	CP288	86	Prod	1174	82	1004	25	NO001	NO001	World	11483	Measurements	0	7008	MEASUREMENTS	Measurements	21		52745	Skin discolouration	0		196182	88	2020-07-13 15:50:08	2020-07-13 15:50:08	2020-07-17 12:54:26	NO001		27.41		7.835		19.58		14.56		12.85		19.23		8.183		0		0.002		0.563
16	CP288	86	Prod	1174	82	1004	25	NO001	NO001	World	11483	Measurements	0	7008	MEASUREMENTS	Measurements	21		52745	Skin discolouration	0		196183	89	2020-07-13 15:50:08	2020-07-13 15:50:08	2020-07-17 12:54:26	NO001		17.59		7.402		10.19		13.54		4.049		16.67		0.919		1.078		5.594		4.397
16	CP288	86	Prod	1174	82	1004	25	NO001	NO001	World	11483	Measurements	0	7008	MEASUREMENTS	Measurements	21		52745	Skin discolouration	0		196184	90	2020-07-13 15:50:08	2020-07-13 15:50:08	2020-07-17 12:54:26	NO001		66.86		10.75		56.1		19.93		46.92		27.95		38.9		0		0.287		8.077
16	CP288	86	Prod	1174	82	1004	25	NO001	NO001	World	11483	Measurements	0	7008	MEASUREMENTS	Measurements	21		52745	Skin discolouration	0		196185	91	2020-07-13 15:50:08	2020-07-13 15:50:08	2020-07-17 12:54:26	NO001		23.11		5.988		17.12		11.39		11.72		15.97		7.14		0.873		5.91		9.279
16	CP288	86	Prod	1175	82	1005	25	NO001	NO001	World	11514	Measurements	0	7008	MEASUREMENTS	Measurements	21		52805	Skin discolouration	0		137991	1	2020-07-13 15:50:02	2020-07-13 15:50:02	2020-07-17 12:54:26	NO001		11.51		6.388		5.128		9.013		2.503		9.136		2.38		2.273		2.135		2.799
16	CP288	86	Prod	1175	82	1005	25	NO001	NO001	World	11514	Measurements	0	7008	MEASUREMENTS	Measurements	21		52805	Skin discolouration	0		195912	47	2020-07-13 15:50:02	2020-07-13 15:50:02	2020-07-17 12:54:26	NO001		11.27		5.202		6.071		7.88		3.393		8.365		2.908		0		0		0.002
16	CP288	86	Prod	1175	82	1005	25	NO001	NO001	World	11514	Measurements	0	7008	MEASUREMENTS	Measurements	21		52805	Skin discolouration	0		195913	48	2020-07-13 15:50:02	2020-07-13 15:50:02	2020-07-17 12:54:26	NO001		2.02		1.959		0.067		2.027		0		2.027		0		0.195		0.344		0.318
16	CP288	86	Prod	1175	82	1005	25	NO001	NO001	World	11514	Measurements	0	7008	MEASUREMENTS	Measurements	21		52805	Skin discolouration	0		195914	49	2020-07-13 15:50:02	2020-07-13 15:50:02	2020-07-17 12:54:26	NO001		2.17		2.143		0.031		2.175		0		2.175		0		0.722		0.324		0.348
16	CP288	86	Prod	1175	82	1005	25	NO001	NO001	World	11514	Measurements	0	7008	MEASUREMENTS	Measurements	21		52805	Skin discolouration	0		195915	50	2020-07-13 15:50:02	2020-07-13 15:50:02	2020-07-17 12:54:26	NO001		1.84		1.828		0.015		1.836		0.007		1.836		0.007		0.542		0.276		0.196
16	CP288	86	Prod	1175	82	1005	25	NO001	NO001	World	11514	Measurements	0	7008	MEASUREMENTS	Measurements	21		52805	Skin discolouration	0		195916	51	2020-07-13 15:50:02	2020-07-13 15:50:02	2020-07-17 12:54:26	NO001		10.19		6.43		3.76		8.799		1.391		8.974		1.216		1.048		1.57		1.917
16	CP288	86	Prod	1175	82	1005	25	NO001	NO001	World	11514	Measurements	0	7008	MEASUREMENTS	Measurements	21		52805	Skin discolouration	0		195917	2	2020-07-13 15:50:02	2020-07-13 15:50:02	2020-07-17 12:54:26	NO001		1.71		1.639		0.073		1.641		0.071		1.641		0.071		0.726		0.168		0.125
16	CP288	86	Prod	1175	82	1005	25	NO001	NO001	World	11514	Measurements	0	7008	MEASUREMENTS	Measurements	21		52805	Skin discolouration	0		195918	3	2020-07-13 15:50:02	2020-07-13 15:50:02	2020-07-17 12:54:26	NO001		6.14		2.389		3.752		2.891		3.25		2.891		3.25		0.354		1.092		3.852
16	CP288	86	Prod	1175	82	1005	25	NO001	NO001	World	11514	Measurements	0	7008	MEASUREMENTS	Measurements	21		52805	Skin discolouration	0		195919	4	2020-07-13 15:50:02	2020-07-13 15:50:02	2020-07-17 12:54:26	NO001		9.07		4.755		4.321		6.748		2.329		7.4		1.676		0.886		1.648		2.858
16	CP288	86	Prod	1175	82	1005	25	NO001	NO001	World	11514	Measurements	0	7008	MEASUREMENTS	Measurements	21		52805	Skin discolouration	0		195920	5	2020-07-13 15:50:02	2020-07-13 15:50:02	2020-07-17 12:54:26	NO001		13.58		4.842		8.742		5.816		7.769		6.148		7.437		0		0		0
16	CP288	86	Prod	1175	82	1005	25	NO001	NO001	World	11514	Measurements	0	7008	MEASUREMENTS	Measurements	21		52805	Skin discolouration	0		195921	6	2020-07-13 15:50:02	2020-07-13 15:50:02	2020-07-17 12:54:26	NO001		2.48		1.869		0.612		2.037		0.445		2.037		0.445		0.348		0.72		0.519
16	CP288	86	Prod	1175	82	1005	25	NO001	NO001	World	11514	Measurements	0	7008	MEASUREMENTS	Measurements	21		52805	Skin discolouration	0		195922	7	2020-07-13 15:50:02	2020-07-13 15:50:02	2020-07-17 12:54:26	NO001		26.11		6.352		19.76		10.1		16.01		10.6		15.5		0.074		0.398		3.114
16	CP288	86	Prod	1175	82	1005	25	NO001	NO001	World	11514	Measurements	0	7008	MEASUREMENTS	Measurements	21		52805	Skin discolouration	0		195923	8	2020-07-13 15:50:02	2020-07-13 15:50:02	2020-07-17 12:54:26	NO001		19.62		7.529		12.09		13.71		5.914		15.44		4.181		0.037		0.285		1.172
16	CP288	86	Prod	1175	82	1005	25	NO001	NO001	World	11514	Measurements	0	7008	MEASUREMENTS	Measurements	21		52805	Skin discolouration	0		195924	9	2020-07-13 15:50:02	2020-07-13 15:50:02	2020-07-17 12:54:26	NO001		5.91		5.046		0.867		5.795		0.118		5.8		0.114		0.661		2.044		3.846
16	CP288	86	Prod	1175	82	1005	25	NO001	NO001	World	11514	Measurements	0	7008	MEASUREMENTS	Measurements	21		52805	Skin discolouration	0		195925	10	2020-07-13 15:50:02	2020-07-13 15:50:02	2020-07-17 12:54:26	NO001		3.2		2.715		0.492		3.185		0.022		3.185		0.022		0.424		0.83		0.563
16	CP288	86	Prod	1175	82	1005	25	NO001	NO001	World	11514	Measurements	0	7008	MEASUREMENTS	Measurements	21		52805	Skin discolouration	0		195926	11	2020-07-13 15:50:02	2020-07-13 15:50:02	2020-07-17 12:54:26	NO001		7.45		5.544		1.914		6.129		1.329		6.146		1.312		0.016		0.015		0.051
16	CP288	86	Prod	1175	82	1005	25	NO001	NO001	World	11514	Measurements	0	7008	MEASUREMENTS	Measurements	21		52805	Skin discolouration	0		195927	12	2020-07-13 15:50:02	2020-07-13 15:50:02	2020-07-17 12:54:26	NO001		1.7		1.609		0.091		1.701		0		1.701		0		0.533		0.294		0.137
16	CP288	86	Prod	1175	82	1005	25	NO001	NO001	World	11514	Measurements	0	7008	MEASUREMENTS	Measurements	21		52805	Skin discolouration	0		195928	13	2020-07-13 15:50:02	2020-07-13 15:50:02	2020-07-17 12:54:26	NO001		1.54		1.528		0.016		1.544		0		1.544		0		0.625		0.451		0.149
16	CP288	86	Prod	1175	82	1005	25	NO001	NO001	World	11514	Measurements	0	7008	MEASUREMENTS	Measurements	21		52805	Skin discolouration	0		195929	14	2020-07-13 15:50:02	2020-07-13 15:50:02	2020-07-17 12:54:26	NO001		10.17		6.493		3.687		9.271		0.909		9.516		0.664		2.341		2.018		1.349
16	CP288	86	Prod	1175	82	1005	25	NO001	NO001	World	11514	Measurements	0	7008	MEASUREMENTS	Measurements	21		52805	Skin discolouration	0		195930	15	2020-07-13 15:50:02	2020-07-13 15:50:02	2020-07-17 12:54:26	NO001		6.9		4.391		2.516		6.282		0.626		6.631		0.277		0.72		1.461		1.905
16	CP288	86	Prod	1175	82	1005	25	NO001	NO001	World	11514	Measurements	0	7008	MEASUREMENTS	Measurements	21		52805	Skin discolouration	0		195931	16	2020-07-13 15:50:02	2020-07-13 15:50:02	2020-07-17 12:54:26	NO001		2.85		2.485		0.365		2.512		0.338		2.512		0.338		0.765		0.419		0.624
16	CP288	86	Prod	1175	82	1005	25	NO001	NO001	World	11514	Measurements	0	7008	MEASUREMENTS	Measurements	21		52805	Skin discolouration	0		195932	17	2020-07-13 15:50:02	2020-07-13 15:50:02	2020-07-17 12:54:26	NO001		0.81		0.808		0.008		0.811		0.005		0.811		0.005		0.286		0.141		0.091
16	CP288	86	Prod	1175	82	1005	25	NO001	NO001	World	11514	Measurements	0	7008	MEASUREMENTS	Measurements	21		52805	Skin discolouration	0		195933	18	2020-07-13 15:50:02	2020-07-13 15:50:02	2020-07-17 12:54:26	NO001		3.21		3.194		0.024		3.218		0		3.218		0		0.162		0.36		0.182
16	CP288	86	Prod	1175	82	1005	25	NO001	NO001	World	11514	Measurements	0	7008	MEASUREMENTS	Measurements	21		52805	Skin discolouration	0		195934	19	2020-07-13 15:50:02	2020-07-13 15:50:02	2020-07-17 12:54:26	NO001		13.21		6.554		6.663		9.491		3.726		9.623		3.595		2.344		1.766		2.543
16	CP288	86	Prod	1175	82	1005	25	NO001	NO001	World	11514	Measurements	0	7008	MEASUREMENTS	Measurements	21		52805	Skin discolouration	0		195935	20	2020-07-13 15:50:02	2020-07-13 15:50:02	2020-07-17 12:54:26	NO001		19.19		7.3		11.89		13.32		5.873		14.63		4.564		3.072		2.668		3.27
16	CP288	86	Prod	1175	82	1005	25	NO001	NO001	World	11514	Measurements	0	7008	MEASUREMENTS	Measurements	21		52805	Skin discolouration	0		195936	21	2020-07-13 15:50:02	2020-07-13 15:50:02	2020-07-17 12:54:26	NO001		11.82		6.563		5.265		10.26		1.565		10.53		1.297		0		0		0.273
16	CP288	86	Prod	1175	82	1005	25	NO001	NO001	World	11514	Measurements	0	7008	MEASUREMENTS	Measurements	21		52805	Skin discolouration	0		195937	22	2020-07-13 15:50:02	2020-07-13 15:50:02	2020-07-17 12:54:26	NO001		7.26		4.846		2.421		6.792		0.475		6.844		0.423		0.002		0.044		0.168
16	CP288	86	Prod	1175	82	1005	25	NO001	NO001	World	11514	Measurements	0	7008	MEASUREMENTS	Measurements	21		52805	Skin discolouration	0		195938	23	2020-07-13 15:50:02	2020-07-13 15:50:02	2020-07-17 12:54:26	NO001		5.77		5.398		0.376		5.774		0		5.774		0		0.771		0.652		0.543
16	CP288	86	Prod	1175	82	1005	25	NO001	NO001	World	11514	Measurements	0	7008	MEASUREMENTS	Measurements	21		52805	Skin discolouration	0		195939	24	2020-07-13 15:50:02	2020-07-13 15:50:02	2020-07-17 12:54:26	NO001		1.84		1.81		0.032		1.823		0.019		1.823		0.019		0.335		0.246		0.107
16	CP288	86	Prod	1175	82	1005	25	NO001	NO001	World	11514	Measurements	0	7008	MEASUREMENTS	Measurements	21		52805	Skin discolouration	0		195940	25	2020-07-13 15:50:02	2020-07-13 15:50:02	2020-07-17 12:54:26	NO001		4.68		4.085		0.604		4.577		0.112		4.625		0.064		0.008		0.03		0.168
16	CP288	86	Prod	1175	82	1005	25	NO001	NO001	World	11514	Measurements	0	7008	MEASUREMENTS	Measurements	21		52805	Skin discolouration	0		195941	26	2020-07-13 15:50:02	2020-07-13 15:50:02	2020-07-17 12:54:26	NO001		9.41		4.293		5.119		5.561		3.851		5.587		3.825		2.398		1.487		1.276
16	CP288	86	Prod	1175	82	1005	25	NO001	NO001	World	11514	Measurements	0	7008	MEASUREMENTS	Measurements	21		52805	Skin discolouration	0		195942	27	2020-07-13 15:50:02	2020-07-13 15:50:02	2020-07-17 12:54:26	NO001		10.17		5.473		4.704		8.476		1.701		8.782		1.394		0.729		1.191		2.083
16	CP288	86	Prod	1175	82	1005	25	NO001	NO001	World	11514	Measurements	0	7008	MEASUREMENTS	Measurements	21		52805	Skin discolouration	0		195943	28	2020-07-13 15:50:02	2020-07-13 15:50:02	2020-07-17 12:54:26	NO001		5.77		5.252		0.525		5.761		0.016		5.777		0		0.002		0.028		0.211
16	CP288	86	Prod	1175	82	1005	25	NO001	NO001	World	11514	Measurements	0	7008	MEASUREMENTS	Measurements	21		52805	Skin discolouration	0		195944	29	2020-07-13 15:50:02	2020-07-13 15:50:02	2020-07-17 12:54:26	NO001		9.31		6.119		3.193		7.668		1.644		7.929		1.383		1.572		1.312		0.926
16	CP288	86	Prod	1175	82	1005	25	NO001	NO001	World	11514	Measurements	0	7008	MEASUREMENTS	Measurements	21		52805	Skin discolouration	0		195945	30	2020-07-13 15:50:02	2020-07-13 15:50:02	2020-07-17 12:54:26	NO001		1.13		1.051		0.083		1.051		0.083		1.051		0.083		0.182		0.163		0.207
16	CP288	86	Prod	1175	82	1005	25	NO001	NO001	World	11514	Measurements	0	7008	MEASUREMENTS	Measurements	21		52805	Skin discolouration	0		195946	31	2020-07-13 15:50:02	2020-07-13 15:50:02	2020-07-17 12:54:26	NO001		2.67		2.501		0.177		2.621		0.057		2.621		0.057		0.304		0.327		0.299
16	CP288	86	Prod	1175	82	1005	25	NO001	NO001	World	11514	Measurements	0	7008	MEASUREMENTS	Measurements	21		52805	Skin discolouration	0		195947	32	2020-07-13 15:50:02	2020-07-13 15:50:02	2020-07-17 12:54:26	NO001		2.36		1.612		0.752		1.745		0.619		1.745		0.619		0.502		0.72		0.161
16	CP288	86	Prod	1175	82	1005	25	NO001	NO001	World	11514	Measurements	0	7008	MEASUREMENTS	Measurements	21		52805	Skin discolouration	0		195948	33	2020-07-13 15:50:02	2020-07-13 15:50:02	2020-07-17 12:54:26	NO001		4.71		4.141		0.577		4.718		0		4.718		0		1.036		0.889		0.728
16	CP288	86	Prod	1175	82	1005	25	NO001	NO001	World	11514	Measurements	0	7008	MEASUREMENTS	Measurements	21		52805	Skin discolouration	0		195949	34	2020-07-13 15:50:02	2020-07-13 15:50:02	2020-07-17 12:54:26	NO001		3.18		2.888		0.3		3.171		0.017		3.188		0		0.027		0.06		0.276
16	CP288	86	Prod	1175	82	1005	25	NO001	NO001	World	11514	Measurements	0	7008	MEASUREMENTS	Measurements	21		52805	Skin discolouration	0		195950	35	2020-07-13 15:50:02	2020-07-13 15:50:02	2020-07-17 12:54:26	NO001		6.69		3.472		3.226		3.693		3.005		3.863		2.835		0.151		0.394		0.795
16	CP288	86	Prod	1175	82	1005	25	NO001	NO001	World	11514	Measurements	0	7008	MEASUREMENTS	Measurements	21		52805	Skin discolouration	0		195951	36	2020-07-13 15:50:02	2020-07-13 15:50:02	2020-07-17 12:54:26	NO001		22.24		7.931		14.31		16.11		6.128		18.86		3.38		0.015		0.028		0.142
16	CP288	86	Prod	1175	82	1005	25	NO001	NO001	World	11514	Measurements	0	7008	MEASUREMENTS	Measurements	21		52805	Skin discolouration	0		195952	37	2020-07-13 15:50:02	2020-07-13 15:50:02	2020-07-17 12:54:26	NO001		15.43		7.404		8.035		11.72		3.714		12.86		2.579		0.5		0.849		2.099
16	CP288	86	Prod	1175	82	1005	25	NO001	NO001	World	11514	Measurements	0	7008	MEASUREMENTS	Measurements	21		52805	Skin discolouration	0		195953	38	2020-07-13 15:50:02	2020-07-13 15:50:02	2020-07-17 12:54:26	NO001		8.7		5.293		3.411		6.423		2.28		6.674		2.03		1.837		2.207		6.444
16	CP288	86	Prod	1175	82	1005	25	NO001	NO001	World	11514	Measurements	0	7008	MEASUREMENTS	Measurements	21		52805	Skin discolouration	0		195954	39	2020-07-13 15:50:02	2020-07-13 15:50:02	2020-07-17 12:54:26	NO001		6.51		4.13		2.383		5.605		0.908		5.658		0.855		0.327		0.743		1.197
16	CP288	86	Prod	1175	82	1005	25	NO001	NO001	World	11514	Measurements	0	7008	MEASUREMENTS	Measurements	21		52805	Skin discolouration	0		195955	40	2020-07-13 15:50:02	2020-07-13 15:50:02	2020-07-17 12:54:26	NO001		3.13		2.879		0.253		3.107		0.025		3.107		0.025		0.67		0.304		0.304
16	CP288	86	Prod	1175	82	1005	25	NO001	NO001	World	11514	Measurements	0	7008	MEASUREMENTS	Measurements	21		52805	Skin discolouration	0		195956	41	2020-07-13 15:50:02	2020-07-13 15:50:02	2020-07-17 12:54:26	NO001		4.84		3.933		0.914		4.444		0.404		4.457		0.39		1.014		1.071		0.94
16	CP288	86	Prod	1175	82	1005	25	NO001	NO001	World	11514	Measurements	0	7008	MEASUREMENTS	Measurements	21		52805	Skin discolouration	0		195957	42	2020-07-13 15:50:02	2020-07-13 15:50:02	2020-07-17 12:54:26	NO001		5.15		4.164		0.987		4.987		0.165		5.023		0.129		0.076		0.135		0.233
16	CP288	86	Prod	1175	82	1005	25	NO001	NO001	World	11514	Measurements	0	7008	MEASUREMENTS	Measurements	21		52805	Skin discolouration	0		195958	43	2020-07-13 15:50:02	2020-07-13 15:50:02	2020-07-17 12:54:26	NO001		1.45		1.364		0.086		1.427		0.024		1.427		0.024		0.343		0.262		0.119
16	CP288	86	Prod	1175	82	1005	25	NO001	NO001	World	11514	Measurements	0	7008	MEASUREMENTS	Measurements	21		52805	Skin discolouration	0		195959	44	2020-07-13 15:50:02	2020-07-13 15:50:02	2020-07-17 12:54:26	NO001		7.39		3.55		3.85		4.877		2.522		4.965		2.434		0.055		0.383		1.127
16	CP288	86	Prod	1175	82	1005	25	NO001	NO001	World	11514	Measurements	0	7008	MEASUREMENTS	Measurements	21		52805	Skin discolouration	0		195960	45	2020-07-13 15:50:02	2020-07-13 15:50:02	2020-07-17 12:54:26	NO001		16.21		5.43		10.78		7.254		8.958		7.299		8.912		0.01		0.234		0.617
16	CP288	86	Prod	1175	82	1005	25	NO001	NO001	World	11514	Measurements	0	7008	MEASUREMENTS	Measurements	21		52805	Skin discolouration	0		195961	46	2020-07-13 15:50:02	2020-07-13 15:50:02	2020-07-17 12:54:26	NO001		1.97		1.144		0.827		1.166		0.805		1.166		0.805		0.45		0.758		0.115
16	CP288	86	Prod	1176	82	1006	25	NO001	NO001	World	11545	Measurements	0	7008	MEASUREMENTS	Measurements	21		52865	Skin discolouration	0		138022	1	2020-07-13 15:49:54	2020-07-13 15:49:54	2020-07-17 12:54:26	NO001		11.43		2.691		8.739		4.218		7.212		4.974		6.456		0		0		0
16	CP288	86	Prod	1176	82	1006	25	NO001	NO001	World	11545	Measurements	0	7008	MEASUREMENTS	Measurements	21		52865	Skin discolouration	0		195815	2	2020-07-13 15:49:54	2020-07-13 15:49:54	2020-07-17 12:54:26	NO001		16.69		2.26		14.43		4.47		12.22		6.185		10.5		0		0		0
16	CP288	86	Prod	1176	82	1006	25	NO001	NO001	World	11545	Measurements	0	7008	MEASUREMENTS	Measurements	21		52865	Skin discolouration	0		195816	3	2020-07-13 15:49:54	2020-07-13 15:49:54	2020-07-17 12:54:26	NO001		50.26		12.57		37.69		21		29.25		29.53		20.73		0		0		0
16	CP288	86	Prod	1176	82	1006	25	NO001	NO001	World	11545	Measurements	0	7008	MEASUREMENTS	Measurements	21		52865	Skin discolouration	0		195817	4	2020-07-13 15:49:54	2020-07-13 15:49:54	2020-07-17 12:54:26	NO001		15.79		3.155		12.64		7.119		8.678		11.27		4.519		1.408		1.531		2.175
16	CP288	86	Prod	1176	82	1006	25	NO001	NO001	World	11545	Measurements	0	7008	MEASUREMENTS	Measurements	21		52865	Skin discolouration	0		195818	5	2020-07-13 15:49:54	2020-07-13 15:49:54	2020-07-17 12:54:26	NO001		55.35		11.02		44.33		19.57		35.78		29.54		25.81		0.008		0.016		0.063
16	CP288	86	Prod	1176	82	1006	25	NO001	NO001	World	11545	Measurements	0	7008	MEASUREMENTS	Measurements	21		52865	Skin discolouration	0		195819	6	2020-07-13 15:49:54	2020-07-13 15:49:54	2020-07-17 12:54:26	NO001		43.1		11.89		31.21		20.73		22.37		29.54		13.56		0		0		0.007
16	CP288	86	Prod	1176	82	1006	25	NO001	NO001	World	11545	Measurements	0	7008	MEASUREMENTS	Measurements	21		52865	Skin discolouration	0		195820	7	2020-07-13 15:49:54	2020-07-13 15:49:54	2020-07-17 12:54:26	NO001		16.56		3.171		13.39		6.704		9.859		10.73		5.832		0		0		0.08
16	CP288	86	Prod	1176	82	1006	25	NO001	NO001	World	11545	Measurements	0	7008	MEASUREMENTS	Measurements	21		52865	Skin discolouration	0		195821	8	2020-07-13 15:49:54	2020-07-13 15:49:54	2020-07-17 12:54:26	NO001		71.03		16.28		54.75		30.32		40.7		44.63		26.4		0		0.039		0.144
16	CP288	86	Prod	1176	82	1006	25	NO001	NO001	World	11545	Measurements	0	7008	MEASUREMENTS	Measurements	21		52865	Skin discolouration	0		195822	9	2020-07-13 15:49:54	2020-07-13 15:49:54	2020-07-17 12:54:26	NO001		45.36		11.6		33.75		18.58		26.77		25.71		19.64		0		0		0
16	CP288	86	Prod	1176	82	1006	25	NO001	NO001	World	11545	Measurements	0	7008	MEASUREMENTS	Measurements	21		52865	Skin discolouration	0		195823	10	2020-07-13 15:49:54	2020-07-13 15:49:54	2020-07-17 12:54:26	NO001		36.08		4.654		31.43		10.16		25.92		16.97		19.1		0		0		0
16	CP288	86	Prod	1176	82	1006	25	NO001	NO001	World	11545	Measurements	0	7008	MEASUREMENTS	Measurements	21		52865	Skin discolouration	0		195824	11	2020-07-13 15:49:54	2020-07-13 15:49:54	2020-07-17 12:54:26	NO001		4.71		1.579		3.137		1.976		2.74		2.365		2.351		0		0		0.001
16	CP288	86	Prod	1176	82	1006	25	NO001	NO001	World	11545	Measurements	0	7008	MEASUREMENTS	Measurements	21		52865	Skin discolouration	0		195825	12	2020-07-13 15:49:54	2020-07-13 15:49:54	2020-07-17 12:54:26	NO001		69.77		7.419		62.35		14.25		55.51		22.08		47.68		0		0		0.002
16	CP288	86	Prod	1176	82	1006	25	NO001	NO001	World	11545	Measurements	0	7008	MEASUREMENTS	Measurements	21		52865	Skin discolouration	0		195826	13	2020-07-13 15:49:54	2020-07-13 15:49:54	2020-07-17 12:54:26	NO001		42.47		8.383		34.09		15.46		27.01		23.49		18.98		0		0		0
16	CP288	86	Prod	1176	82	1006	25	NO001	NO001	World	11545	Measurements	0	7008	MEASUREMENTS	Measurements	21		52865	Skin discolouration	0		195827	14	2020-07-13 15:49:54	2020-07-13 15:49:54	2020-07-17 12:54:26	NO001		48.45		12.81		35.64		21.1		27.35		30.09		18.36		0		0.009		0.06
16	CP288	86	Prod	1176	82	1006	25	NO001	NO001	World	11545	Measurements	0	7008	MEASUREMENTS	Measurements	21		52865	Skin discolouration	0		195828	15	2020-07-13 15:49:54	2020-07-13 15:49:54	2020-07-17 12:54:26	NO001		22.74		3.148		19.59		7.181		15.56		11.28		11.46		0.008		0.033		0.362
16	CP288	86	Prod	1176	82	1006	25	NO001	NO001	World	11545	Measurements	0	7008	MEASUREMENTS	Measurements	21		52865	Skin discolouration	0		195829	16	2020-07-13 15:49:54	2020-07-13 15:49:54	2020-07-17 12:54:26	NO001		39.15		11.84		27.3		18.95		20.19		26.21		12.93		0		0		0
16	CP288	86	Prod	1176	82	1006	25	NO001	NO001	World	11545	Measurements	0	7008	MEASUREMENTS	Measurements	21		52865	Skin discolouration	0		195830	17	2020-07-13 15:49:54	2020-07-13 15:49:54	2020-07-17 12:54:26	NO001		49.86		6.165		43.7		11.92		37.94		17.99		31.87		0		0.011		0.085
16	CP288	86	Prod	1176	82	1006	25	NO001	NO001	World	11545	Measurements	0	7008	MEASUREMENTS	Measurements	21		52865	Skin discolouration	0		195831	18	2020-07-13 15:49:54	2020-07-13 15:49:54	2020-07-17 12:54:26	NO001		34.64		10.14		24.5		15.86		18.78		20.97		13.66		0		0		0
16	CP288	86	Prod	1176	82	1006	25	NO001	NO001	World	11545	Measurements	0	7008	MEASUREMENTS	Measurements	21		52865	Skin discolouration	0		195832	19	2020-07-13 15:49:54	2020-07-13 15:49:54	2020-07-17 12:54:26	NO001		52.02		10.33		41.69		18.69		33.33		27.31		24.71		0.01		0.02		0.266
16	CP288	86	Prod	1176	82	1006	25	NO001	NO001	World	11545	Measurements	0	7008	MEASUREMENTS	Measurements	21		52865	Skin discolouration	0		195833	20	2020-07-13 15:49:54	2020-07-13 15:49:54	2020-07-17 12:54:26	NO001		32.09		4.218		27.87		7.753		24.34		11.19		20.9		0		0		0
16	CP288	86	Prod	1176	82	1006	25	NO001	NO001	World	11545	Measurements	0	7008	MEASUREMENTS	Measurements	21		52865	Skin discolouration	0		195834	21	2020-07-13 15:49:54	2020-07-13 15:49:54	2020-07-17 12:54:26	NO001		26.64		4.672		21.97		9.509		17.13		13.83		12.81		0		0		0.008
16	CP288	86	Prod	1176	82	1006	25	NO001	NO001	World	11545	Measurements	0	7008	MEASUREMENTS	Measurements	21		52865	Skin discolouration	0		195835	22	2020-07-13 15:49:54	2020-07-13 15:49:54	2020-07-17 12:54:26	NO001		35		11.29		23.7		19.42		15.57		26.22		8.773		0		0		0
16	CP288	86	Prod	1176	82	1006	25	NO001	NO001	World	11545	Measurements	0	7008	MEASUREMENTS	Measurements	21		52865	Skin discolouration	0		195836	23	2020-07-13 15:49:54	2020-07-13 15:49:54	2020-07-17 12:54:26	NO001		14.73		5.407		9.325		9.095		5.637		12.3		2.432		0		0		0
16	CP288	86	Prod	1176	82	1006	25	NO001	NO001	World	11545	Measurements	0	7008	MEASUREMENTS	Measurements	21		52865	Skin discolouration	0		195837	24	2020-07-13 15:49:54	2020-07-13 15:49:54	2020-07-17 12:54:26	NO001		51.17		8.967		42.21		15.94		35.23		22.35		28.82		0		0		0.018
16	CP288	86	Prod	1176	82	1006	25	NO001	NO001	World	11545	Measurements	0	7008	MEASUREMENTS	Measurements	21		52865	Skin discolouration	0		195838	25	2020-07-13 15:49:54	2020-07-13 15:49:54	2020-07-17 12:54:26	NO001		52.39		8.411		43.98		16.11		36.28		24.35		28.04		0		0		0.031
16	CP288	86	Prod	1176	82	1006	25	NO001	NO001	World	11545	Measurements	0	7008	MEASUREMENTS	Measurements	21		52865	Skin discolouration	0		195839	26	2020-07-13 15:49:54	2020-07-13 15:49:54	2020-07-17 12:54:26	NO001		43.16		5.44		37.72		10.56		32.6		16.02		27.14		0		0		0
16	CP288	86	Prod	1177	82	1007	25	NO001	NO001	World	11576	Measurements	0	7008	MEASUREMENTS	Measurements	21		52925	Skin discolouration	0		138151	1	2020-07-13 15:50:04	2020-07-13 15:50:04	2020-07-17 12:54:26	NO001		3.43		1.569		1.865		1.803		1.631		1.905		1.529		0.05		0.249		0.748
16	CP288	86	Prod	1177	82	1007	25	NO001	NO001	World	11576	Measurements	0	7008	MEASUREMENTS	Measurements	21		52925	Skin discolouration	0		195962	2	2020-07-13 15:50:04	2020-07-13 15:50:04	2020-07-17 12:54:26	NO001		26.59		2.402		24.19		4.044		22.55		6.442		20.15		0.107		0.735		2.541
16	CP288	86	Prod	1177	82	1007	25	NO001	NO001	World	11576	Measurements	0	7008	MEASUREMENTS	Measurements	21		52925	Skin discolouration	0		195963	3	2020-07-13 15:50:04	2020-07-13 15:50:04	2020-07-17 12:54:26	NO001		0.56		0.56		0		0.56		0		0.56		0		0.073		0.099		0.074
16	CP288	86	Prod	1177	82	1007	25	NO001	NO001	World	11576	Measurements	0	7008	MEASUREMENTS	Measurements	21		52925	Skin discolouration	0		195964	4	2020-07-13 15:50:04	2020-07-13 15:50:04	2020-07-17 12:54:26	NO001		1.64		1.642		0		1.642		0		1.642		0		0.076		0.127		0.158
16	CP288	86	Prod	1177	82	1007	25	NO001	NO001	World	11576	Measurements	0	7008	MEASUREMENTS	Measurements	21		52925	Skin discolouration	0		195965	5	2020-07-13 15:50:04	2020-07-13 15:50:04	2020-07-17 12:54:26	NO001		2.54		1.492		1.049		2.189		0.352		2.456		0.086		0.007		0.109		0.399
16	CP288	86	Prod	1177	82	1007	25	NO001	NO001	World	11576	Measurements	0	7008	MEASUREMENTS	Measurements	21		52925	Skin discolouration	0		195966	6	2020-07-13 15:50:04	2020-07-13 15:50:04	2020-07-17 12:54:26	NO001		8.15		2.63		5.529		3.636		4.523		4.159		4		0.206		1.541		2.254
16	CP288	86	Prod	1177	82	1007	25	NO001	NO001	World	11576	Measurements	0	7008	MEASUREMENTS	Measurements	21		52925	Skin discolouration	0		195967	7	2020-07-13 15:50:04	2020-07-13 15:50:04	2020-07-17 12:54:26	NO001		3.2		2.664		0.54		2.741		0.464		2.741		0.464		0.048		0.297		0.356
16	CP288	86	Prod	1177	82	1007	25	NO001	NO001	World	11576	Measurements	0	7008	MEASUREMENTS	Measurements	21		52925	Skin discolouration	0		195968	8	2020-07-13 15:50:04	2020-07-13 15:50:04	2020-07-17 12:54:26	NO001		3.2		2.365		0.838		2.695		0.508		2.695		0.508		0.004		0.065		0.152
16	CP288	86	Prod	1177	82	1007	25	NO001	NO001	World	11576	Measurements	0	7008	MEASUREMENTS	Measurements	21		52925	Skin discolouration	0		195969	9	2020-07-13 15:50:04	2020-07-13 15:50:04	2020-07-17 12:54:26	NO001		2.55		1.709		0.85		1.719		0.839		1.719		0.839		0.076		0.228		0.716
16	CP288	86	Prod	1177	82	1007	25	NO001	NO001	World	11576	Measurements	0	7008	MEASUREMENTS	Measurements	21		52925	Skin discolouration	0		195970	10	2020-07-13 15:50:04	2020-07-13 15:50:04	2020-07-17 12:54:26	NO001		3.92		2.429		1.497		2.686		1.241		2.816		1.11		0.053		0.294		0.855
16	CP288	86	Prod	1177	82	1007	25	NO001	NO001	World	11576	Measurements	0	7008	MEASUREMENTS	Measurements	21		52925	Skin discolouration	0		195971	11	2020-07-13 15:50:04	2020-07-13 15:50:04	2020-07-17 12:54:26	NO001		1.89		1.14		0.754		1.143		0.75		1.209		0.684		0.039		0.041		0.298
16	CP288	86	Prod	1177	82	1007	25	NO001	NO001	World	11576	Measurements	0	7008	MEASUREMENTS	Measurements	21		52925	Skin discolouration	0		195972	12	2020-07-13 15:50:04	2020-07-13 15:50:04	2020-07-17 12:54:26	NO001		11.35		2.58		8.774		4.203		7.151		5.814		5.54		0.463		1.507		2.486
16	CP288	86	Prod	1177	82	1007	25	NO001	NO001	World	11576	Measurements	0	7008	MEASUREMENTS	Measurements	21		52925	Skin discolouration	0		195973	13	2020-07-13 15:50:04	2020-07-13 15:50:04	2020-07-17 12:54:26	NO001		3.21		1.509		1.704		1.681		1.532		1.713		1.501		0.22		1.412		0.889
16	CP288	86	Prod	1177	82	1007	25	NO001	NO001	World	11576	Measurements	0	7008	MEASUREMENTS	Measurements	21		52925	Skin discolouration	0		195974	14	2020-07-13 15:50:04	2020-07-13 15:50:04	2020-07-17 12:54:26	NO001		1.34		1.245		0.099		1.31		0.034		1.31		0.034		0.011		0.222		0.417
16	CP288	86	Prod	1177	82	1007	25	NO001	NO001	World	11576	Measurements	0	7008	MEASUREMENTS	Measurements	21		52925	Skin discolouration	0		195975	15	2020-07-13 15:50:04	2020-07-13 15:50:04	2020-07-17 12:54:26	NO001		1.89		1.504		0.386		1.504		0.386		1.504		0.386		0.011		0.389		0.037
16	CP288	86	Prod	1177	82	1007	25	NO001	NO001	World	11576	Measurements	0	7008	MEASUREMENTS	Measurements	21		52925	Skin discolouration	0		195976	16	2020-07-13 15:50:04	2020-07-13 15:50:04	2020-07-17 12:54:26	NO001		3.02		2.301		0.719		2.599		0.421		2.641		0.38		0.051		0.201		0.724
16	CP288	86	Prod	1177	82	1007	25	NO001	NO001	World	11576	Measurements	0	7008	MEASUREMENTS	Measurements	21		52925	Skin discolouration	0		195977	17	2020-07-13 15:50:04	2020-07-13 15:50:04	2020-07-17 12:54:26	NO001		4.17		2.276		1.898		3.577		0.596		3.802		0.372		0.048		0.341		1.333
16	CP288	86	Prod	1177	82	1007	25	NO001	NO001	World	11576	Measurements	0	7008	MEASUREMENTS	Measurements	21		52925	Skin discolouration	0		195978	18	2020-07-13 15:50:04	2020-07-13 15:50:04	2020-07-17 12:54:26	NO001		5.29		3.356		1.939		4.541		0.754		4.915		0.38		0.457		0.839		1.159
16	CP288	86	Prod	1177	82	1007	25	NO001	NO001	World	11576	Measurements	0	7008	MEASUREMENTS	Measurements	21		52925	Skin discolouration	0		195979	19	2020-07-13 15:50:04	2020-07-13 15:50:04	2020-07-17 12:54:26	NO001		3.19		1.122		2.069		1.175		2.016		1.44		1.751		0.001		0.026		0.775
16	CP288	86	Prod	1177	82	1007	25	NO001	NO001	World	11576	Measurements	0	7008	MEASUREMENTS	Measurements	21		52925	Skin discolouration	0		195980	20	2020-07-13 15:50:04	2020-07-13 15:50:04	2020-07-17 12:54:26	NO001		3.56		0.954		2.615		1.433		2.136		2.115		1.454		0		0.005		0.04
16	CP288	86	Prod	1177	82	1007	25	NO001	NO001	World	11576	Measurements	0	7008	MEASUREMENTS	Measurements	21		52925	Skin discolouration	0		195981	21	2020-07-13 15:50:04	2020-07-13 15:50:04	2020-07-17 12:54:26	NO001		6.57		2.859		3.719		3.187		3.391		3.555		3.024		0.08		0.578		2.033
16	CP288	86	Prod	1177	82	1007	25	NO001	NO001	World	11576	Measurements	0	7008	MEASUREMENTS	Measurements	21		52925	Skin discolouration	0		195982	22	2020-07-13 15:50:04	2020-07-13 15:50:04	2020-07-17 12:54:26	NO001		4.82		3.413		1.407		3.583		1.237		4.01		0.81		0.088		0.324		0.575
16	CP288	86	Prod	1177	82	1007	25	NO001	NO001	World	11576	Measurements	0	7008	MEASUREMENTS	Measurements	21		52925	Skin discolouration	0		195983	23	2020-07-13 15:50:04	2020-07-13 15:50:04	2020-07-17 12:54:26	NO001		5.45		1.259		4.196		1.792		3.663		2.232		3.223		0.01		0.092		0.446
16	CP288	86	Prod	1177	82	1007	25	NO001	NO001	World	11576	Measurements	0	7008	MEASUREMENTS	Measurements	21		52925	Skin discolouration	0		195984	24	2020-07-13 15:50:04	2020-07-13 15:50:04	2020-07-17 12:54:26	NO001		12.25		3.282		8.975		4.777		7.481		5.432		6.825		0		0.031		0.515
16	CP288	86	Prod	1177	82	1007	25	NO001	NO001	World	11576	Measurements	0	7008	MEASUREMENTS	Measurements	21		52925	Skin discolouration	0		195985	25	2020-07-13 15:50:04	2020-07-13 15:50:04	2020-07-17 12:54:26	NO001		1.88		0.906		0.983		0.906		0.983		0.906		0.983		0.044		0.32		0.701
16	CP288	86	Prod	1177	82	1007	25	NO001	NO001	World	11576	Measurements	0	7008	MEASUREMENTS	Measurements	21		52925	Skin discolouration	0		195986	26	2020-07-13 15:50:04	2020-07-13 15:50:04	2020-07-17 12:54:26	NO001		10.88		2.572		8.309		3.405		7.476		4.536		6.345		0.054		0.645		1.86
16	CP288	86	Prod	1177	82	1007	25	NO001	NO001	World	11576	Measurements	0	7008	MEASUREMENTS	Measurements	21		52925	Skin discolouration	0		195987	27	2020-07-13 15:50:04	2020-07-13 15:50:04	2020-07-17 12:54:26	NO001		10.49		2.642		7.855		3.551		6.946		4.345		6.152		0.036		0.101		3.682
16	CP288	86	Prod	1177	82	1007	25	NO001	NO001	World	11576	Measurements	0	7008	MEASUREMENTS	Measurements	21		52925	Skin discolouration	0		195988	28	2020-07-13 15:50:04	2020-07-13 15:50:04	2020-07-17 12:54:26	NO001		11.8		3.256		8.545		3.957		7.844		5.031		6.77		0.016		0.028		0.253
16	CP288	86	Prod	1177	82	1007	25	NO001	NO001	World	11576	Measurements	0	7008	MEASUREMENTS	Measurements	21		52925	Skin discolouration	0		195989	29	2020-07-13 15:50:04	2020-07-13 15:50:04	2020-07-17 12:54:26	NO001		8.49		3.092		5.403		5.595		2.899		7.469		1.026		0.12		1.321		3.339
16	CP288	86	Prod	1177	82	1007	25	NO001	NO001	World	11576	Measurements	0	7008	MEASUREMENTS	Measurements	21		52925	Skin discolouration	0		195990	30	2020-07-13 15:50:04	2020-07-13 15:50:04	2020-07-17 12:54:26	NO001		13.7		1.554		12.15		1.728		11.97		1.86		11.84		0.029		0.223		0.657
16	CP288	86	Prod	1177	82	1007	25	NO001	NO001	World	11576	Measurements	0	7008	MEASUREMENTS	Measurements	21		52925	Skin discolouration	0		195991	31	2020-07-13 15:50:04	2020-07-13 15:50:04	2020-07-17 12:54:26	NO001		2.76		2.066		0.701		2.533		0.235		2.767		0		0.232		0.183		0.536
16	CP288	86	Prod	1177	82	1007	25	NO001	NO001	World	11576	Measurements	0	7008	MEASUREMENTS	Measurements	21		52925	Skin discolouration	0		195992	32	2020-07-13 15:50:04	2020-07-13 15:50:04	2020-07-17 12:54:26	NO001		6.8		2.381		4.427		2.586		4.223		2.669		4.139		0.011		0.158		1.059
16	CP288	86	Prod	1177	82	1007	25	NO001	NO001	World	11576	Measurements	0	7008	MEASUREMENTS	Measurements	21		52925	Skin discolouration	0		195993	33	2020-07-13 15:50:04	2020-07-13 15:50:04	2020-07-17 12:54:26	NO001		3.16		2.057		1.104		2.248		0.913		2.248		0.913		0.008		0.081		0.197
16	CP288	86	Prod	1177	82	1007	25	NO001	NO001	World	11576	Measurements	0	7008	MEASUREMENTS	Measurements	21		52925	Skin discolouration	0		195994	34	2020-07-13 15:50:04	2020-07-13 15:50:04	2020-07-17 12:54:26	NO001		8.55		4.478		4.081		5.915		2.645		6.055		2.505		0.065		1.118		2.754
16	CP288	86	Prod	1177	82	1007	25	NO001	NO001	World	11576	Measurements	0	7008	MEASUREMENTS	Measurements	21		52925	Skin discolouration	0		195995	35	2020-07-13 15:50:04	2020-07-13 15:50:04	2020-07-17 12:54:26	NO001		7.62		2.81		4.819		4.304		3.325		5.453		2.176		0.08		0.161		0.691
16	CP288	86	Prod	1177	82	1007	25	NO001	NO001	World	11576	Measurements	0	7008	MEASUREMENTS	Measurements	21		52925	Skin discolouration	0		195996	36	2020-07-13 15:50:04	2020-07-13 15:50:04	2020-07-17 12:54:26	NO001		12.87		2.196		10.67		3.03		9.844		4.071		8.803		0.046		0.096		0.798
16	CP288	86	Prod	1177	82	1007	25	NO001	NO001	World	11576	Measurements	0	7008	MEASUREMENTS	Measurements	21		52925	Skin discolouration	0		195997	37	2020-07-13 15:50:04	2020-07-13 15:50:04	2020-07-17 12:54:26	NO001		6.21		2.042		4.168		2.452		3.759		2.642		3.568		0.021		0.16		0.714
16	CP288	86	Prod	1177	82	1007	25	NO001	NO001	World	11576	Measurements	0	7008	MEASUREMENTS	Measurements	21		52925	Skin discolouration	0		195998	38	2020-07-13 15:50:04	2020-07-13 15:50:04	2020-07-17 12:54:26	NO001		1.02		1.022		0		1.022		0		1.022		0		0.054		0.081		0.104
16	CP288	86	Prod	1177	82	1007	25	NO001	NO001	World	11576	Measurements	0	7008	MEASUREMENTS	Measurements	21		52925	Skin discolouration	0		195999	39	2020-07-13 15:50:04	2020-07-13 15:50:04	2020-07-17 12:54:26	NO001		6.38		1.432		4.956		1.559		4.83		1.607		4.782		0.034		1.233		2.851
16	CP288	86	Prod	1177	82	1007	25	NO001	NO001	World	11576	Measurements	0	7008	MEASUREMENTS	Measurements	21		52925	Skin discolouration	0		196000	40	2020-07-13 15:50:04	2020-07-13 15:50:04	2020-07-17 12:54:26	NO001		9.06		2.212		6.85		3.438		5.624		3.993		5.069		0.115		1.416		3.501
16	CP288	86	Prod	1177	82	1007	25	NO001	NO001	World	11576	Measurements	0	7008	MEASUREMENTS	Measurements	21		52925	Skin discolouration	0		196001	41	2020-07-13 15:50:04	2020-07-13 15:50:04	2020-07-17 12:54:26	NO001		8.39		1.761		6.635		1.998		6.398		2.22		6.176		0.178		0.711		1.992
16	CP288	86	Prod	1177	82	1007	25	NO001	NO001	World	11576	Measurements	0	7008	MEASUREMENTS	Measurements	21		52925	Skin discolouration	0		196002	42	2020-07-13 15:50:04	2020-07-13 15:50:04	2020-07-17 12:54:26	NO001		1.64		1.632		0.011		1.632		0.011		1.632		0.011		0.087		0.089		0.141
16	CP288	86	Prod	1177	82	1007	25	NO001	NO001	World	11576	Measurements	0	7008	MEASUREMENTS	Measurements	21		52925	Skin discolouration	0		196003	43	2020-07-13 15:50:04	2020-07-13 15:50:04	2020-07-17 12:54:26	NO001		2.38		2.265		0.12		2.287		0.098		2.287		0.098		0.007		0.021		0.053
16	CP288	86	Prod	1177	82	1007	25	NO001	NO001	World	11576	Measurements	0	7008	MEASUREMENTS	Measurements	21		52925	Skin discolouration	0		196004	44	2020-07-13 15:50:04	2020-07-13 15:50:04	2020-07-17 12:54:26	NO001		13.98		2.67		11.31		4.422		9.563		6.078		7.908		0		0		0
16	CP288	86	Prod	1177	82	1007	25	NO001	NO001	World	11576	Measurements	0	7008	MEASUREMENTS	Measurements	21		52925	Skin discolouration	0		196005	45	2020-07-13 15:50:04	2020-07-13 15:50:04	2020-07-17 12:54:26	NO001		1.84		1.684		0.161		1.717		0.129		1.83		0.016		0.052		0.094		0.458
16	CP288	86	Prod	1177	82	1007	25	NO001	NO001	World	11576	Measurements	0	7008	MEASUREMENTS	Measurements	21		52925	Skin discolouration	0		196006	46	2020-07-13 15:50:04	2020-07-13 15:50:04	2020-07-17 12:54:26	NO001		7.16		0.637		6.525		0.666		6.496		0.783		6.379		0.013		0.505		0.646
16	CP288	86	Prod	1177	82	1007	25	NO001	NO001	World	11576	Measurements	0	7008	MEASUREMENTS	Measurements	21		52925	Skin discolouration	0		196007	47	2020-07-13 15:50:04	2020-07-13 15:50:04	2020-07-17 12:54:26	NO001		3.09		2.066		1.031		2.298		0.799		2.309		0.787		0.198		0.517		0.865
16	CP288	86	Prod	1177	82	1007	25	NO001	NO001	World	11576	Measurements	0	7008	MEASUREMENTS	Measurements	21		52925	Skin discolouration	0		196008	48	2020-07-13 15:50:04	2020-07-13 15:50:04	2020-07-17 12:54:26	NO001		2.62		2.472		0.153		2.513		0.111		2.513		0.111		0.034		0.093		0.181
16	CP288	86	Prod	1177	82	1007	25	NO001	NO001	World	11576	Measurements	0	7008	MEASUREMENTS	Measurements	21		52925	Skin discolouration	0		196009	49	2020-07-13 15:50:04	2020-07-13 15:50:04	2020-07-17 12:54:26	NO001		4.95		1.435		3.521		1.451		3.504		1.551		3.404		0.12		0.374		0.801
16	CP288	86	Prod	1177	82	1007	25	NO001	NO001	World	11576	Measurements	0	7008	MEASUREMENTS	Measurements	21		52925	Skin discolouration	0		196010	50	2020-07-13 15:50:04	2020-07-13 15:50:04	2020-07-17 12:54:26	NO001		11.15		2.503		8.653		3.474		7.682		4.348		6.808		0.028		0.245		1.246
16	CP288	86	Prod	1177	82	1007	25	NO001	NO001	World	11576	Measurements	0	7008	MEASUREMENTS	Measurements	21		52925	Skin discolouration	0		196011	51	2020-07-13 15:50:04	2020-07-13 15:50:04	2020-07-17 12:54:26	NO001		4.27		2.239		2.037		3.037		1.239		3.375		0.901		0.019		0.049		0.225
16	CP288	86	Prod	1177	82	1007	25	NO001	NO001	World	11576	Measurements	0	7008	MEASUREMENTS	Measurements	21		52925	Skin discolouration	0		196012	52	2020-07-13 15:50:04	2020-07-13 15:50:04	2020-07-17 12:54:26	NO001		5.07		2.077		3		2.122		2.955		2.122		2.955		0.323		0.398		0.565
16	CP288	86	Prod	1177	82	1007	25	NO001	NO001	World	11576	Measurements	0	7008	MEASUREMENTS	Measurements	21		52925	Skin discolouration	0		196013	53	2020-07-13 15:50:04	2020-07-13 15:50:04	2020-07-17 12:54:26	NO001		12.42		2.391		10.03		3.624		8.8		4.514		7.91		0.053		0.271		0.428
16	CP288	86	Prod	1177	82	1007	25	NO001	NO001	World	11576	Measurements	0	7008	MEASUREMENTS	Measurements	21		52925	Skin discolouration	0		196014	54	2020-07-13 15:50:04	2020-07-13 15:50:04	2020-07-17 12:54:26	NO001		8.12		8.09		0.035		8.125		0		8.125		0		0.002		0.022		0.119
16	CP288	86	Prod	1177	82	1007	25	NO001	NO001	World	11576	Measurements	0	7008	MEASUREMENTS	Measurements	21		52925	Skin discolouration	0		196015	55	2020-07-13 15:50:04	2020-07-13 15:50:04	2020-07-17 12:54:26	NO001		9.6		2.739		6.871		3.915		5.694		4.343		5.266		0.096		0.39		1.324
16	CP288	86	Prod	1177	82	1007	25	NO001	NO001	World	11576	Measurements	0	7008	MEASUREMENTS	Measurements	21		52925	Skin discolouration	0		196016	56	2020-07-13 15:50:04	2020-07-13 15:50:04	2020-07-17 12:54:26	NO001		18.95		2.971		15.98		4.422		14.53		5.653		13.3		0.477		0.278		1.406
16	CP288	86	Prod	1177	82	1007	25	NO001	NO001	World	11576	Measurements	0	7008	MEASUREMENTS	Measurements	21		52925	Skin discolouration	0		196017	57	2020-07-13 15:50:04	2020-07-13 15:50:04	2020-07-17 12:54:26	NO001		7.27		2.698		4.581		3.078		4.202		3.289		3.991		0.292		0.546		1.396
16	CP288	86	Prod	1177	82	1007	25	NO001	NO001	World	11576	Measurements	0	7008	MEASUREMENTS	Measurements	21		52925	Skin discolouration	0		196018	58	2020-07-13 15:50:04	2020-07-13 15:50:04	2020-07-17 12:54:26	NO001		1.99		1.591		0.402		1.592		0.401		1.592		0.401		0.057		0.176		0.131
16	CP288	86	Prod	1177	82	1007	25	NO001	NO001	World	11576	Measurements	0	7008	MEASUREMENTS	Measurements	21		52925	Skin discolouration	0		196019	59	2020-07-13 15:50:04	2020-07-13 15:50:04	2020-07-17 12:54:26	NO001		2.63		1.447		1.192		1.455		1.185		1.455		1.185		0.188		0.572		0.663
16	CP288	86	Prod	1177	82	1007	25	NO001	NO001	World	11576	Measurements	0	7008	MEASUREMENTS	Measurements	21		52925	Skin discolouration	0		196020	60	2020-07-13 15:50:04	2020-07-13 15:50:04	2020-07-17 12:54:26	NO001		2.75		2.751		0.003		2.755		0		2.755		0		0.018		0.047		0.145
16	CP288	86	Prod	1177	82	1007	25	NO001	NO001	World	11576	Measurements	0	7008	MEASUREMENTS	Measurements	21		52925	Skin discolouration	0		196021	61	2020-07-13 15:50:04	2020-07-13 15:50:04	2020-07-17 12:54:26	NO001		1.84		1.805		0.043		1.835		0.013		1.835		0.013		0.111		0.438		0.443
16	CP288	86	Prod	1177	82	1007	25	NO001	NO001	World	11576	Measurements	0	7008	MEASUREMENTS	Measurements	21		52925	Skin discolouration	0		196022	62	2020-07-13 15:50:04	2020-07-13 15:50:04	2020-07-17 12:54:26	NO001		3.47		1.546		1.93		1.668		1.808		1.668		1.808		0.013		0.347		0.677
16	CP288	86	Prod	1177	82	1007	25	NO001	NO001	World	11576	Measurements	0	7008	MEASUREMENTS	Measurements	21		52925	Skin discolouration	0		196023	63	2020-07-13 15:50:04	2020-07-13 15:50:04	2020-07-17 12:54:26	NO001		21.34		2.205		19.14		3.62		17.72		6.568		14.78		0.067		0.691		1.625
16	CP288	86	Prod	1177	82	1007	25	NO001	NO001	World	11576	Measurements	0	7008	MEASUREMENTS	Measurements	21		52925	Skin discolouration	0		196024	64	2020-07-13 15:50:04	2020-07-13 15:50:04	2020-07-17 12:54:26	NO001		2.69		1.488		1.211		1.709		0.99		2.246		0.453		0.495		0.668		0.52
16	CP288	86	Prod	1177	82	1007	25	NO001	NO001	World	11576	Measurements	0	7008	MEASUREMENTS	Measurements	21		52925	Skin discolouration	0		196025	65	2020-07-13 15:50:04	2020-07-13 15:50:04	2020-07-17 12:54:26	NO001		7.72		3.32		4.401		4.151		3.57		4.351		3.37		0.738		1.197		1.29
16	CP288	86	Prod	1177	82	1007	25	NO001	NO001	World	11576	Measurements	0	7008	MEASUREMENTS	Measurements	21		52925	Skin discolouration	0		196026	66	2020-07-13 15:50:04	2020-07-13 15:50:04	2020-07-17 12:54:26	NO001		1.48		1.43		0.059		1.478		0.01		1.478		0.01		0.021		0.05		0.279
16	CP288	86	Prod	1177	82	1007	25	NO001	NO001	World	11576	Measurements	0	7008	MEASUREMENTS	Measurements	21		52925	Skin discolouration	0		196027	67	2020-07-13 15:50:04	2020-07-13 15:50:04	2020-07-17 12:54:26	NO001		2.34		2.281		0.067		2.34		0.008		2.34		0.008		0.297		0.241		0.257
16	CP288	86	Prod	1177	82	1007	25	NO001	NO001	World	11576	Measurements	0	7008	MEASUREMENTS	Measurements	21		52925	Skin discolouration	0		196028	68	2020-07-13 15:50:04	2020-07-13 15:50:04	2020-07-17 12:54:26	NO001		1.93		1.56		0.372		1.563		0.369		1.563		0.369		0.024		0.083		0.165
16	CP288	86	Prod	1177	82	1007	25	NO001	NO001	World	11576	Measurements	0	7008	MEASUREMENTS	Measurements	21		52925	Skin discolouration	0		196029	69	2020-07-13 15:50:04	2020-07-13 15:50:04	2020-07-17 12:54:26	NO001		2.42		2.207		0.222		2.41		0.018		2.429		0		0.117		0.433		0.437
16	CP288	86	Prod	1177	82	1007	25	NO001	NO001	World	11576	Measurements	0	7008	MEASUREMENTS	Measurements	21		52925	Skin discolouration	0		196030	70	2020-07-13 15:50:04	2020-07-13 15:50:04	2020-07-17 12:54:26	NO001		6.72		2.091		4.63		2.365		4.356		2.886		3.835		0.054		0.068		0.858
16	CP288	86	Prod	1177	82	1007	25	NO001	NO001	World	11576	Measurements	0	7008	MEASUREMENTS	Measurements	21		52925	Skin discolouration	0		196031	71	2020-07-13 15:50:04	2020-07-13 15:50:04	2020-07-17 12:54:26	NO001		6.79		1.651		5.142		1.787		5.006		1.977		4.816		0.047		0.246		1.457
16	CP288	86	Prod	1177	82	1007	25	NO001	NO001	World	11576	Measurements	0	7008	MEASUREMENTS	Measurements	21		52925	Skin discolouration	0		196032	72	2020-07-13 15:50:04	2020-07-13 15:50:04	2020-07-17 12:54:26	NO001		11.6		3.457		8.145		4.945		6.657		6.006		5.596		0.945		0.826		1.507
16	CP288	86	Prod	1177	82	1007	25	NO001	NO001	World	11576	Measurements	0	7008	MEASUREMENTS	Measurements	21		52925	Skin discolouration	0		196033	73	2020-07-13 15:50:04	2020-07-13 15:50:04	2020-07-17 12:54:26	NO001		14.2		4.604		9.603		7.752		6.456		10.47		3.73		0.241		0.309		0.486
16	CP288	86	Prod	1177	82	1007	25	NO001	NO001	World	11576	Measurements	0	7008	MEASUREMENTS	Measurements	21		52925	Skin discolouration	0		196034	74	2020-07-13 15:50:04	2020-07-13 15:50:04	2020-07-17 12:54:26	NO001		12.75		2.657		10.09		4.683		8.071		6.886		5.868		0.28		1.529		3.229
16	CP288	86	Prod	1177	82	1007	25	NO001	NO001	World	11576	Measurements	0	7008	MEASUREMENTS	Measurements	21		52925	Skin discolouration	0		196035	75	2020-07-13 15:50:04	2020-07-13 15:50:04	2020-07-17 12:54:26	NO001		3.7		2.062		1.639		2.113		1.588		2.288		1.414		0.253		1.793		0.469
16	CP288	86	Prod	1177	82	1007	25	NO001	NO001	World	11576	Measurements	0	7008	MEASUREMENTS	Measurements	21		52925	Skin discolouration	0		196036	76	2020-07-13 15:50:04	2020-07-13 15:50:04	2020-07-17 12:54:26	NO001		1.48		1.455		0.03		1.485		0		1.485		0		0.023		0.044		0.078
16	CP288	86	Prod	1177	82	1007	25	NO001	NO001	World	11576	Measurements	0	7008	MEASUREMENTS	Measurements	21		52925	Skin discolouration	0		196037	77	2020-07-13 15:50:04	2020-07-13 15:50:04	2020-07-17 12:54:26	NO001		2.52		2.528		0		2.528		0		2.528		0		0.02		0.08		0.167
16	CP288	86	Prod	1177	82	1007	25	NO001	NO001	World	11576	Measurements	0	7008	MEASUREMENTS	Measurements	21		52925	Skin discolouration	0		196038	78	2020-07-13 15:50:04	2020-07-13 15:50:04	2020-07-17 12:54:26	NO001		7.75		2.39		5.366		2.66		5.096		2.888		4.869		0.242		0.938		2.945
16	CP288	86	Prod	1177	82	1007	25	NO001	NO001	World	11576	Measurements	0	7008	MEASUREMENTS	Measurements	21		52925	Skin discolouration	0		196039	79	2020-07-13 15:50:04	2020-07-13 15:50:04	2020-07-17 12:54:26	NO001		3.57		1.586		1.993		1.631		1.948		1.631		1.948		0.114		1.362		0.781
16	CP288	86	Prod	1177	82	1007	25	NO001	NO001	World	11576	Measurements	0	7008	MEASUREMENTS	Measurements	21		52925	Skin discolouration	0		196040	80	2020-07-13 15:50:04	2020-07-13 15:50:04	2020-07-17 12:54:26	NO001		18.93		3.026		15.9		3.737		15.19		4.387		14.54		0		0		0.127
16	CP288	86	Prod	1177	82	1007	25	NO001	NO001	World	11576	Measurements	0	7008	MEASUREMENTS	Measurements	21		52925	Skin discolouration	0		196041	81	2020-07-13 15:50:04	2020-07-13 15:50:04	2020-07-17 12:54:26	NO001		5.53		2.805		2.733		3.216		2.323		3.216		2.323		0.061		0.198		0.708
16	CP288	86	Prod	1177	82	1007	25	NO001	NO001	World	11576	Measurements	0	7008	MEASUREMENTS	Measurements	21		52925	Skin discolouration	0		196042	82	2020-07-13 15:50:04	2020-07-13 15:50:04	2020-07-17 12:54:26	NO001		15.97		3.338		12.63		4.31		11.66		5.211		10.76		0.206		0.369		1.562
16	CP288	86	Prod	1178	82	1008	25	NO001	NO001	World	11607	Measurements	0	7008	MEASUREMENTS	Measurements	21		52985	Skin discolouration	0		138182	1	2020-07-13 15:50:04	2020-07-13 15:50:04	2020-07-17 12:54:26	NO001		11.25		3.97		7.289		6.588		4.671		8.625		2.634		0.036		0.191		0.731
16	CP288	86	Prod	1178	82	1008	25	NO001	NO001	World	11607	Measurements	0	7008	MEASUREMENTS	Measurements	21		52985	Skin discolouration	0		196043	2	2020-07-13 15:50:04	2020-07-13 15:50:04	2020-07-17 12:54:26	NO001		15.37		2.61		12.76		4.458		10.91		6.783		8.591		0		0.021		0.696
16	CP288	86	Prod	1178	82	1008	25	NO001	NO001	World	11607	Measurements	0	7008	MEASUREMENTS	Measurements	21		52985	Skin discolouration	0		196044	3	2020-07-13 15:50:04	2020-07-13 15:50:04	2020-07-17 12:54:26	NO001		6.54		2.784		3.766		3.56		2.99		4.538		2.012		0.005		0.169		1.048
16	CP288	86	Prod	1178	82	1008	25	NO001	NO001	World	11607	Measurements	0	7008	MEASUREMENTS	Measurements	21		52985	Skin discolouration	0		196045	4	2020-07-13 15:50:04	2020-07-13 15:50:04	2020-07-17 12:54:26	NO001		5.68		5.204		0.478		5.49		0.192		0.002		5.68		0		0.022		0.154
16	CP288	86	Prod	1178	82	1008	25	NO001	NO001	World	11607	Measurements	0	7008	MEASUREMENTS	Measurements	21		52985	Skin discolouration	0		196046	5	2020-07-13 15:50:04	2020-07-13 15:50:04	2020-07-17 12:54:26	NO001		8.15		3.586		4.565		4.719		3.432		5.278		2.873		0.023		0.513		1.505
16	CP288	86	Prod	1178	82	1008	25	NO001	NO001	World	11607	Measurements	0	7008	MEASUREMENTS	Measurements	21		52985	Skin discolouration	0		196047	6	2020-07-13 15:50:04	2020-07-13 15:50:04	2020-07-17 12:54:26	NO001		6.23		2.568		3.664		3.435		2.797		3.874		2.358		0.153		0.354		2.082
16	CP288	86	Prod	1178	82	1008	25	NO001	NO001	World	11607	Measurements	0	7008	MEASUREMENTS	Measurements	21		52985	Skin discolouration	0		196048	7	2020-07-13 15:50:04	2020-07-13 15:50:04	2020-07-17 12:54:26	NO001		12.41		4.34		8.078		6.29		6.128		0.178		12.24		0.145		1.154		2.104
16	CP288	86	Prod	1178	82	1008	25	NO001	NO001	World	11607	Measurements	0	7008	MEASUREMENTS	Measurements	21		52985	Skin discolouration	0		196049	8	2020-07-13 15:50:04	2020-07-13 15:50:04	2020-07-17 12:54:26	NO001		12.54		3.747		8.803		0		12.55		0.004		12.54		0.01		0.105		0.289
16	CP288	86	Prod	1178	82	1008	25	NO001	NO001	World	11607	Measurements	0	7008	MEASUREMENTS	Measurements	21		52985	Skin discolouration	0		196050	9	2020-07-13 15:50:04	2020-07-13 15:50:04	2020-07-17 12:54:26	NO001		9.85		2.223		7.637		2.832		7.028		3.542		6.317		1.98		2.69		1.634
16	CP288	86	Prod	1178	82	1008	25	NO001	NO001	World	11607	Measurements	0	7008	MEASUREMENTS	Measurements	21		52985	Skin discolouration	0		196051	10	2020-07-13 15:50:04	2020-07-13 15:50:04	2020-07-17 12:54:26	NO001		3.96		3.071		0.896		3.508		0.458		3.512		0.454		0.204		0.32		0.191
16	CP288	86	Prod	1178	82	1008	25	NO001	NO001	World	11607	Measurements	0	7008	MEASUREMENTS	Measurements	21		52985	Skin discolouration	0		196052	11	2020-07-13 15:50:04	2020-07-13 15:50:04	2020-07-17 12:54:26	NO001		7.85		0.119		7.734		0.035		7.817		0.079		7.773		0.001		0.005		0.174
16	CP288	86	Prod	1178	82	1008	25	NO001	NO001	World	11607	Measurements	0	7008	MEASUREMENTS	Measurements	21		52985	Skin discolouration	0		196053	12	2020-07-13 15:50:04	2020-07-13 15:50:04	2020-07-17 12:54:26	NO001		9.05		2.249		6.807		3.678		5.379		5.434		3.623		0.004		0.106		0.651
16	CP288	86	Prod	1178	82	1008	25	NO001	NO001	World	11607	Measurements	0	7008	MEASUREMENTS	Measurements	21		52985	Skin discolouration	0		196054	13	2020-07-13 15:50:04	2020-07-13 15:50:04	2020-07-17 12:54:26	NO001		9.67		3.766		5.912		6.894		2.784		8.082		1.596		0.162		0.695		0.872
16	CP288	86	Prod	1178	82	1008	25	NO001	NO001	World	11607	Measurements	0	7008	MEASUREMENTS	Measurements	21		52985	Skin discolouration	0		196055	14	2020-07-13 15:50:04	2020-07-13 15:50:04	2020-07-17 12:54:26	NO001		13.99		4.8		9.199		6.266		7.733		6.792		7.207		0.762		2.927		2.64
16	CP288	86	Prod	1178	82	1008	25	NO001	NO001	World	11607	Measurements	0	7008	MEASUREMENTS	Measurements	21		52985	Skin discolouration	0		196056	15	2020-07-13 15:50:04	2020-07-13 15:50:04	2020-07-17 12:54:26	NO001		12.88		3.793		9.09		6.844		6.039		10.06		2.813		0.257		0.518		1.187
16	CP288	86	Prod	1178	82	1008	25	NO001	NO001	World	11607	Measurements	0	7008	MEASUREMENTS	Measurements	21		52985	Skin discolouration	0		196057	16	2020-07-13 15:50:04	2020-07-13 15:50:04	2020-07-17 12:54:26	NO001		11.81		4.083		7.736		7.333		4.486		10.18		1.631		0.218		0.876		1.387
16	CP288	86	Prod	1178	82	1008	25	NO001	NO001	World	11607	Measurements	0	7008	MEASUREMENTS	Measurements	21		52985	Skin discolouration	0		196058	17	2020-07-13 15:50:04	2020-07-13 15:50:04	2020-07-17 12:54:26	NO001		14.34		4.581		9.762		8.875		5.468		12.16		2.182		0.165		0.344		1.722
16	CP288	86	Prod	1178	82	1008	25	NO001	NO001	World	11607	Measurements	0	7008	MEASUREMENTS	Measurements	21		52985	Skin discolouration	0		196059	18	2020-07-13 15:50:04	2020-07-13 15:50:04	2020-07-17 12:54:26	NO001		14.3		6.005		8.297		9.54		4.762		11.53		2.765		0.049		0.606		1.622
16	CP288	86	Prod	1178	82	1008	25	NO001	NO001	World	11607	Measurements	0	7008	MEASUREMENTS	Measurements	21		52985	Skin discolouration	0		196060	19	2020-07-13 15:50:04	2020-07-13 15:50:04	2020-07-17 12:54:26	NO001		6.33		3.657		2.679		5.219		1.117		5.558		0.779		0.034		0.721		0.943
16	CP288	86	Prod	1178	82	1008	25	NO001	NO001	World	11607	Measurements	0	7008	MEASUREMENTS	Measurements	21		52985	Skin discolouration	0		196061	20	2020-07-13 15:50:04	2020-07-13 15:50:04	2020-07-17 12:54:26	NO001		7.33		1.802		5.531		2.958		4.375		3.69		3.643		0.578		0.204		0.753
16	CP288	86	Prod	1178	82	1008	25	NO001	NO001	World	11607	Measurements	0	7008	MEASUREMENTS	Measurements	21		52985	Skin discolouration	0		196062	21	2020-07-13 15:50:04	2020-07-13 15:50:04	2020-07-17 12:54:26	NO001		24.97		4.111		20.86		9.205		15.76		0.201		24.77		0.032		0.582		1.704
16	CP288	86	Prod	1178	82	1008	25	NO001	NO001	World	11607	Measurements	0	7008	MEASUREMENTS	Measurements	21		52985	Skin discolouration	0		196063	22	2020-07-13 15:50:04	2020-07-13 15:50:04	2020-07-17 12:54:26	NO001		9.49		2.787		6.707		4.438		5.056		7.012		2.482		0.001		0.095		0.749
16	CP288	86	Prod	1178	82	1008	25	NO001	NO001	World	11607	Measurements	0	7008	MEASUREMENTS	Measurements	21		52985	Skin discolouration	0		196064	23	2020-07-13 15:50:04	2020-07-13 15:50:04	2020-07-17 12:54:26	NO001		12.77		3.716		9.055		5.526		7.245		6.745		6.026		3.248		2.569		2.15
16	CP288	86	Prod	1178	82	1008	25	NO001	NO001	World	11607	Measurements	0	7008	MEASUREMENTS	Measurements	21		52985	Skin discolouration	0		196065	24	2020-07-13 15:50:04	2020-07-13 15:50:04	2020-07-17 12:54:26	NO001		12.2		1.768		10.43		2.71		9.498		0.019		12.18		0.014		0.455		0.508
16	CP288	86	Prod	1178	82	1008	25	NO001	NO001	World	11607	Measurements	0	7008	MEASUREMENTS	Measurements	21		52985	Skin discolouration	0		196066	25	2020-07-13 15:50:04	2020-07-13 15:50:04	2020-07-17 12:54:26	NO001		9.08		4.271		4.812		5.915		3.167		6.646		2.437		0.93		2.766		2.309
16	CP288	86	Prod	1178	82	1008	25	NO001	NO001	World	11607	Measurements	0	7008	MEASUREMENTS	Measurements	21		52985	Skin discolouration	0		196067	26	2020-07-13 15:50:04	2020-07-13 15:50:04	2020-07-17 12:54:26	NO001		7.01		0.947		6.066		1.214		5.798		2.598		4.415		1.722		2.896		5.775
16	CP288	86	Prod	1178	82	1008	25	NO001	NO001	World	11607	Measurements	0	7008	MEASUREMENTS	Measurements	21		52985	Skin discolouration	0		196068	27	2020-07-13 15:50:04	2020-07-13 15:50:04	2020-07-17 12:54:26	NO001		19.38		5.445		13.93		8.775		10.6		11.27		8.111		0.001		0.018		0.123
16	CP288	86	Prod	1178	82	1008	25	NO001	NO001	World	11607	Measurements	0	7008	MEASUREMENTS	Measurements	21		52985	Skin discolouration	0		196069	28	2020-07-13 15:50:04	2020-07-13 15:50:04	2020-07-17 12:54:26	NO001		18.97		8.054		10.92		0.05		18.92		0.186		18.78		0.001		0.229		0.572
16	CP288	86	Prod	1178	82	1008	25	NO001	NO001	World	11607	Measurements	0	7008	MEASUREMENTS	Measurements	21		52985	Skin discolouration	0		196070	29	2020-07-13 15:50:04	2020-07-13 15:50:04	2020-07-17 12:54:26	NO001		12.05		3.398		8.66		5.176		6.882		7.786		4.272		0		0.475		2.149
16	CP288	86	Prod	1178	82	1008	25	NO001	NO001	World	11607	Measurements	0	7008	MEASUREMENTS	Measurements	21		52985	Skin discolouration	0		196071	30	2020-07-13 15:50:04	2020-07-13 15:50:04	2020-07-17 12:54:26	NO001		8.57		2.292		6.281		2.901		5.672		4.406		4.167		2.076		2.234		1.284
16	CP288	86	Prod	1178	82	1008	25	NO001	NO001	World	11607	Measurements	0	7008	MEASUREMENTS	Measurements	21		52985	Skin discolouration	0		196072	31	2020-07-13 15:50:04	2020-07-13 15:50:04	2020-07-17 12:54:26	NO001		9.95		5.94		4.019		0.213		9.746		0.109		9.85		0.849		1.376		1.65
16	CP288	86	Prod	1178	82	1008	25	NO001	NO001	World	11607	Measurements	0	7008	MEASUREMENTS	Measurements	21		52985	Skin discolouration	0		196073	32	2020-07-13 15:50:04	2020-07-13 15:50:04	2020-07-17 12:54:26	NO001		3.34		2.884		0.465		3.108		0.24		3.172		0.176		0.009		0.133		0.144
16	CP288	86	Prod	1178	82	1008	25	NO001	NO001	World	11607	Measurements	0	7008	MEASUREMENTS	Measurements	21		52985	Skin discolouration	0		196074	33	2020-07-13 15:50:04	2020-07-13 15:50:04	2020-07-17 12:54:26	NO001		8.6		2.208		6.399		2.212		6.395		2.212		6.395		0.002		0.3		1.104
16	CP288	86	Prod	1178	82	1008	25	NO001	NO001	World	11607	Measurements	0	7008	MEASUREMENTS	Measurements	21		52985	Skin discolouration	0		196075	34	2020-07-13 15:50:04	2020-07-13 15:50:04	2020-07-17 12:54:26	NO001		12.18		0.228		11.95		0.236		11.95		0.194		11.99		0.14		1.094		3.083
16	CP288	86	Prod	1178	82	1008	25	NO001	NO001	World	11607	Measurements	0	7008	MEASUREMENTS	Measurements	21		52985	Skin discolouration	0		196076	35	2020-07-13 15:50:04	2020-07-13 15:50:04	2020-07-17 12:54:26	NO001		6.26		3.303		2.961		4.63		1.634		5.288		0.976		0.07		0.492		0.243
16	CP288	86	Prod	1178	82	1008	25	NO001	NO001	World	11607	Measurements	0	7008	MEASUREMENTS	Measurements	21		52985	Skin discolouration	0		196077	36	2020-07-13 15:50:04	2020-07-13 15:50:04	2020-07-17 12:54:26	NO001		13.78		5.013		8.775		7.406		6.381		8.051		5.737		0.738		0.342		2.47
16	CP288	86	Prod	1178	82	1008	25	NO001	NO001	World	11607	Measurements	0	7008	MEASUREMENTS	Measurements	21		52985	Skin discolouration	0		196078	37	2020-07-13 15:50:04	2020-07-13 15:50:04	2020-07-17 12:54:26	NO001		8.36		2.694		5.675		3.555		4.814		4.04		4.329		0.901		1.303		1.111
16	CP288	86	Prod	1178	82	1008	25	NO001	NO001	World	11607	Measurements	0	7008	MEASUREMENTS	Measurements	21		52985	Skin discolouration	0		196079	38	2020-07-13 15:50:04	2020-07-13 15:50:04	2020-07-17 12:54:26	NO001		19.11		4.017		15.09		7.234		11.88		10.81		8.295		0.033		0.216		1.217
16	CP288	86	Prod	1178	82	1008	25	NO001	NO001	World	11607	Measurements	0	7008	MEASUREMENTS	Measurements	21		52985	Skin discolouration	0		196080	39	2020-07-13 15:50:04	2020-07-13 15:50:04	2020-07-17 12:54:26	NO001		4.16		2.092		2.071		2.48		1.683		0		4.164		0.018		0.16		0.193
16	CP288	86	Prod	1178	82	1008	25	NO001	NO001	World	11607	Measurements	0	7008	MEASUREMENTS	Measurements	21		52985	Skin discolouration	0		196081	40	2020-07-13 15:50:04	2020-07-13 15:50:04	2020-07-17 12:54:26	NO001		10.94		0.234		10.71		0.032		10.91		0.003		10.94		0.009		0.081		3.766
16	CP288	86	Prod	1178	82	1008	25	NO001	NO001	World	11607	Measurements	0	7008	MEASUREMENTS	Measurements	21		52985	Skin discolouration	0		196082	41	2020-07-13 15:50:04	2020-07-13 15:50:04	2020-07-17 12:54:26	NO001		14.32		5.049		9.28		8.902		5.427		11.76		2.565		0.094		0.444		0.694
16	CP288	86	Prod	1178	82	1008	25	NO001	NO001	World	11607	Measurements	0	7008	MEASUREMENTS	Measurements	21		52985	Skin discolouration	0		196083	42	2020-07-13 15:50:04	2020-07-13 15:50:04	2020-07-17 12:54:26	NO001		6.56		2.221		4.343		2.84		3.724		3.73		2.833		0.18		0.579		0.439
16	CP288	86	Prod	1178	82	1008	25	NO001	NO001	World	11607	Measurements	0	7008	MEASUREMENTS	Measurements	21		52985	Skin discolouration	0		196084	43	2020-07-13 15:50:04	2020-07-13 15:50:04	2020-07-17 12:54:26	NO001		50.15		9.192		40.96		17.36		32.79		24.11		26.04		0.34		0.696		3.505
16	CP288	86	Prod	1178	82	1008	25	NO001	NO001	World	11607	Measurements	0	7008	MEASUREMENTS	Measurements	21		52985	Skin discolouration	0		196085	44	2020-07-13 15:50:04	2020-07-13 15:50:04	2020-07-17 12:54:26	NO001		9.22		0.365		8.858		0.265		8.958		0.05		9.173		0.524		1.003		1.253
16	CP288	86	Prod	1178	82	1008	25	NO001	NO001	World	11607	Measurements	0	7008	MEASUREMENTS	Measurements	21		52985	Skin discolouration	0		196086	45	2020-07-13 15:50:04	2020-07-13 15:50:04	2020-07-17 12:54:26	NO001		10.5		3.67		6.831		6.121		4.38		7.978		2.523		0.321		1.025		1.755
16	CP288	86	Prod	1178	82	1008	25	NO001	NO001	World	11607	Measurements	0	7008	MEASUREMENTS	Measurements	21		52985	Skin discolouration	0		196087	46	2020-07-13 15:50:04	2020-07-13 15:50:04	2020-07-17 12:54:26	NO001		14.66		5.806		8.861		10.15		4.513		13.35		1.307		0		0		0
16	CP288	86	Prod	1178	82	1008	25	NO001	NO001	World	11607	Measurements	0	7008	MEASUREMENTS	Measurements	21		52985	Skin discolouration	0		196088	47	2020-07-13 15:50:04	2020-07-13 15:50:04	2020-07-17 12:54:26	NO001		0		0		0		0		0		0		0		0		0		0
16	CP288	86	Prod	1178	82	1008	25	NO001	NO001	World	11607	Measurements	0	7008	MEASUREMENTS	Measurements	21		52985	Skin discolouration	0		196089	48	2020-07-13 15:50:04	2020-07-13 15:50:04	2020-07-17 12:54:26	NO001		24.66		5.589		19.07		7.714		16.95		8.614		16.05		0.681		2.233		3.859
16	CP288	86	Prod	1178	82	1008	25	NO001	NO001	World	11607	Measurements	0	7008	MEASUREMENTS	Measurements	21		52985	Skin discolouration	0		196090	49	2020-07-13 15:50:04	2020-07-13 15:50:04	2020-07-17 12:54:26	NO001		14.64		3.541		11.09		6.188		8.452		8.138		6.502		1.304		0.998		0.913
16	CP288	86	Prod	1178	82	1008	25	NO001	NO001	World	11607	Measurements	0	7008	MEASUREMENTS	Measurements	21		52985	Skin discolouration	0		196091	50	2020-07-13 15:50:04	2020-07-13 15:50:04	2020-07-17 12:54:26	NO001		18.45		4.085		14.37		5.597		12.86		6.79		11.66		3.748		2.677		3.173
16	CP288	86	Prod	1178	82	1008	25	NO001	NO001	World	11607	Measurements	0	7008	MEASUREMENTS	Measurements	21		52985	Skin discolouration	0		196092	51	2020-07-13 15:50:04	2020-07-13 15:50:04	2020-07-17 12:54:26	NO001		13.94		5.122		8.819		7.538		6.404		9.211		4.731		0.002		0.288		2.239
16	CP288	86	Prod	1178	82	1008	25	NO001	NO001	World	11607	Measurements	0	7008	MEASUREMENTS	Measurements	21		52985	Skin discolouration	0		196093	52	2020-07-13 15:50:04	2020-07-13 15:50:04	2020-07-17 12:54:26	NO001		9.93		3.245		6.694		4.09		5.849		4.314		5.625		0.009		0.29		1.073
16	CP288	86	Prod	1178	82	1008	25	NO001	NO001	World	11607	Measurements	0	7008	MEASUREMENTS	Measurements	21		52985	Skin discolouration	0		196094	53	2020-07-13 15:50:04	2020-07-13 15:50:04	2020-07-17 12:54:26	NO001		15.04		6.612		8.437		10.42		4.625		0.154		14.89		0.129		1.294		2.468
16	CP288	86	Prod	1178	82	1008	25	NO001	NO001	World	11607	Measurements	0	7008	MEASUREMENTS	Measurements	21		52985	Skin discolouration	0		196095	54	2020-07-13 15:50:04	2020-07-13 15:50:04	2020-07-17 12:54:26	NO001		8.12		4.605		3.521		6.598		1.527		0.03		8.096		0.244		0.578		1.638
16	CP288	86	Prod	1179	82	1009	25	NO001	NO001	World	11638	Measurements	0	7008	MEASUREMENTS	Measurements	21		53045	Skin discolouration	0		138311	1	2020-07-13 17:32:35	2020-07-13 17:32:35	2020-07-17 12:54:26	NO001		19.52		2.346		17.18		4.163		15.36		6.121		13.4		0.242		3.414		6.429
16	CP288	86	Prod	1179	82	1009	25	NO001	NO001	World	11638	Measurements	0	7008	MEASUREMENTS	Measurements	21		53045	Skin discolouration	0		196226	2	2020-07-13 17:32:35	2020-07-13 17:32:35	2020-07-17 12:54:26	NO001		31.25		3.931		27.32		8.379		22.87		11.87		19.38		0.944		4.061		10.64
16	CP288	86	Prod	1179	82	1009	25	NO001	NO001	World	11638	Measurements	0	7008	MEASUREMENTS	Measurements	21		53045	Skin discolouration	0		196227	3	2020-07-13 17:32:35	2020-07-13 17:32:35	2020-07-17 12:54:26	NO001		21.9		4.17		17.73		6.333		15.57		7.26		14.64		0.039		0.26		2.37
16	CP288	86	Prod	1179	82	1009	25	NO001	NO001	World	11638	Measurements	0	7008	MEASUREMENTS	Measurements	21		53045	Skin discolouration	0		196228	4	2020-07-13 17:32:35	2020-07-13 17:32:35	2020-07-17 12:54:26	NO001		49.96		4.738		45.22		7.82		42.14		11.65		38.31		0		0		0.15
16	CP288	86	Prod	1179	82	1009	25	NO001	NO001	World	11638	Measurements	0	7008	MEASUREMENTS	Measurements	21		53045	Skin discolouration	0		196229	5	2020-07-13 17:32:35	2020-07-13 17:32:35	2020-07-17 12:54:26	NO001		22.46		1.59		20.87		3.832		18.63		6.127		16.34		0.075		1.308		7.497
16	CP288	86	Prod	1179	82	1009	25	NO001	NO001	World	11638	Measurements	0	7008	MEASUREMENTS	Measurements	21		53045	Skin discolouration	0		196230	6	2020-07-13 17:32:35	2020-07-13 17:32:35	2020-07-17 12:54:26	NO001		25.47		4.642		20.83		8.107		17.36		10.59		14.87		0.134		1.598		10.63
16	CP288	86	Prod	1179	82	1009	25	NO001	NO001	World	11638	Measurements	0	7008	MEASUREMENTS	Measurements	21		53045	Skin discolouration	0		196231	7	2020-07-13 17:32:35	2020-07-13 17:32:35	2020-07-17 12:54:26	NO001		21.23		3.654		17.58		6.245		14.99		7.078		14.15		0.003		0.172		3.006
16	CP288	86	Prod	1179	82	1009	25	NO001	NO001	World	11638	Measurements	0	7008	MEASUREMENTS	Measurements	21		53045	Skin discolouration	0		196232	8	2020-07-13 17:32:35	2020-07-13 17:32:35	2020-07-17 12:54:26	NO001		27.96		5.721		22.24		10.14		17.81		12		15.95		0.1		0.79		5.352
16	CP288	86	Prod	1179	82	1009	25	NO001	NO001	World	11638	Measurements	0	7008	MEASUREMENTS	Measurements	21		53045	Skin discolouration	0		196233	9	2020-07-13 17:32:35	2020-07-13 17:32:35	2020-07-17 12:54:26	NO001		28.4		3.208		25.19		5.167		23.24		7.63		20.77		0.002		0.076		1.883
16	CP288	86	Prod	1179	82	1009	25	NO001	NO001	World	11638	Measurements	0	7008	MEASUREMENTS	Measurements	21		53045	Skin discolouration	0		196234	10	2020-07-13 17:32:35	2020-07-13 17:32:35	2020-07-17 12:54:26	NO001		41.26		3.937		37.33		7.092		34.17		10.95		30.31		0.938		6.931		24.92
16	CP288	86	Prod	1179	82	1009	25	NO001	NO001	World	11638	Measurements	0	7008	MEASUREMENTS	Measurements	21		53045	Skin discolouration	0		196235	11	2020-07-13 17:32:35	2020-07-13 17:32:35	2020-07-17 12:54:26	NO001		21.74		2.363		19.38		4.375		17.36		6.934		14.8		0.24		0.725		3.753
16	CP288	86	Prod	1179	82	1009	25	NO001	NO001	World	11638	Measurements	0	7008	MEASUREMENTS	Measurements	21		53045	Skin discolouration	0		196236	12	2020-07-13 17:32:35	2020-07-13 17:32:35	2020-07-17 12:54:26	NO001		24.84		3.055		21.78		4.431		20.41		5.571		19.27		0.03		0.546		4.58
16	CP288	86	Prod	1179	82	1009	25	NO001	NO001	World	11638	Measurements	0	7008	MEASUREMENTS	Measurements	21		53045	Skin discolouration	0		196237	13	2020-07-13 17:32:35	2020-07-13 17:32:35	2020-07-17 12:54:26	NO001		34.4		5.84		28.56		10.8		23.59		15.1		19.29		0		0.05		0.231
16	CP288	86	Prod	1179	82	1009	25	NO001	NO001	World	11638	Measurements	0	7008	MEASUREMENTS	Measurements	21		53045	Skin discolouration	0		196238	14	2020-07-13 17:32:35	2020-07-13 17:32:35	2020-07-17 12:54:26	NO001		17.72		4.038		13.68		4.845		12.87		4.866		12.85		0		0.016		0.972
16	CP288	86	Prod	1179	82	1009	25	NO001	NO001	World	11638	Measurements	0	7008	MEASUREMENTS	Measurements	21		53045	Skin discolouration	0		196239	15	2020-07-13 17:32:35	2020-07-13 17:32:35	2020-07-17 12:54:26	NO001		27.22		4.481		22.74		6.089		21.13		7.231		19.99		0.009		0.344		4.023
16	CP288	86	Prod	1179	82	1009	25	NO001	NO001	World	11638	Measurements	0	7008	MEASUREMENTS	Measurements	21		53045	Skin discolouration	0		196240	16	2020-07-13 17:32:35	2020-07-13 17:32:35	2020-07-17 12:54:26	NO001		25.97		4.261		21.71		7.071		18.9		9.555		16.41		0.015		0.593		3.429
16	CP288	86	Prod	1179	82	1009	25	NO001	NO001	World	11638	Measurements	0	7008	MEASUREMENTS	Measurements	21		53045	Skin discolouration	0		196241	17	2020-07-13 17:32:35	2020-07-13 17:32:35	2020-07-17 12:54:26	NO001		29.03		5.97		23.06		10.74		18.29		14.26		14.76		0		0.028		1.827
16	CP288	86	Prod	1179	82	1009	25	NO001	NO001	World	11638	Measurements	0	7008	MEASUREMENTS	Measurements	21		53045	Skin discolouration	0		196242	18	2020-07-13 17:32:35	2020-07-13 17:32:35	2020-07-17 12:54:26	NO001		15.57		3.452		12.12		4.687		10.89		5.341		10.23		0.027		0.921		4.581
16	CP288	86	Prod	1179	82	1009	25	NO001	NO001	World	11638	Measurements	0	7008	MEASUREMENTS	Measurements	21		53045	Skin discolouration	0		196243	19	2020-07-13 17:32:35	2020-07-13 17:32:35	2020-07-17 12:54:26	NO001		41.28		5.126		36.15		9.4		31.88		13.36		27.91		0.077		2.38		11.64
16	CP288	86	Prod	1179	82	1009	25	NO001	NO001	World	11638	Measurements	0	7008	MEASUREMENTS	Measurements	21		53045	Skin discolouration	0		196244	20	2020-07-13 17:32:35	2020-07-13 17:32:35	2020-07-17 12:54:26	NO001		23.9		3.872		20.02		6.009		17.89		6.778		17.12		0.04		0.576		5.925
16	CP288	86	Prod	1179	82	1009	25	NO001	NO001	World	11638	Measurements	0	7008	MEASUREMENTS	Measurements	21		53045	Skin discolouration	0		196245	21	2020-07-13 17:32:35	2020-07-13 17:32:35	2020-07-17 12:54:26	NO001		25.64		3.349		22.3		5.543		20.1		6.924		18.72		0		0.02		1.763
16	CP288	86	Prod	1179	82	1009	25	NO001	NO001	World	11638	Measurements	0	7008	MEASUREMENTS	Measurements	21		53045	Skin discolouration	0		196246	22	2020-07-13 17:32:35	2020-07-13 17:32:35	2020-07-17 12:54:26	NO001		28.42		3.132		25.29		5.922		22.5		8.966		19.46		0		0.02		2.211
16	CP288	86	Prod	1179	82	1009	25	NO001	NO001	World	11638	Measurements	0	7008	MEASUREMENTS	Measurements	21		53045	Skin discolouration	0		196247	23	2020-07-13 17:32:35	2020-07-13 17:32:35	2020-07-17 12:54:26	NO001		29.81		4.012		25.8		7.912		21.9		11.5		18.3		0.59		5.57		16.02
16	CP288	86	Prod	1179	82	1009	25	NO001	NO001	World	11638	Measurements	0	7008	MEASUREMENTS	Measurements	21		53045	Skin discolouration	0		196248	24	2020-07-13 17:32:35	2020-07-13 17:32:35	2020-07-17 12:54:26	NO001		29.95		4.353		25.6		8.364		21.59		11.07		18.87		0.155		0.313		2.869
16	CP288	86	Prod	1179	82	1009	25	NO001	NO001	World	11638	Measurements	0	7008	MEASUREMENTS	Measurements	21		53045	Skin discolouration	0		196249	25	2020-07-13 17:32:35	2020-07-13 17:32:35	2020-07-17 12:54:26	NO001		30.07		4.773		25.29		8.394		21.67		10.94		19.13		0.081		1.397		4.122
16	CP288	86	Prod	1179	82	1009	25	NO001	NO001	World	11638	Measurements	0	7008	MEASUREMENTS	Measurements	21		53045	Skin discolouration	0		196250	26	2020-07-13 17:32:35	2020-07-13 17:32:35	2020-07-17 12:54:26	NO001		18.58		4.362		14.22		7.549		11.03		8.595		9.992		0.004		0.619		5.27
16	CP288	86	Prod	1179	82	1009	25	NO001	NO001	World	11638	Measurements	0	7008	MEASUREMENTS	Measurements	21		53045	Skin discolouration	0		196251	27	2020-07-13 17:32:35	2020-07-13 17:32:35	2020-07-17 12:54:26	NO001		19.43		3.722		15.71		5.253		14.18		6.221		13.21		0.01		0.545		5.826
16	CP288	86	Prod	1179	82	1009	25	NO001	NO001	World	11638	Measurements	0	7008	MEASUREMENTS	Measurements	21		53045	Skin discolouration	0		196252	28	2020-07-13 17:32:35	2020-07-13 17:32:35	2020-07-17 12:54:26	NO001		21.18		2.98		18.2		5.047		16.13		6.984		14.19		0.031		0.681		5.229
16	CP288	86	Prod	1179	82	1009	25	NO001	NO001	World	11638	Measurements	0	7008	MEASUREMENTS	Measurements	21		53045	Skin discolouration	0		196253	29	2020-07-13 17:32:35	2020-07-13 17:32:35	2020-07-17 12:54:26	NO001		26.01		4.559		21.45		7.209		18.8		10.31		15.69		0		0.004		0.461
16	CP288	86	Prod	1179	82	1009	25	NO001	NO001	World	11638	Measurements	0	7008	MEASUREMENTS	Measurements	21		53045	Skin discolouration	0		196254	30	2020-07-13 17:32:35	2020-07-13 17:32:35	2020-07-17 12:54:26	NO001		26.65		4.542		22.11		7.487		19.16		8.044		18.61		0.202		1.019		9.013
16	CP288	86	Prod	1179	82	1009	25	NO001	NO001	World	11638	Measurements	0	7008	MEASUREMENTS	Measurements	21		53045	Skin discolouration	0		196255	31	2020-07-13 17:32:35	2020-07-13 17:32:35	2020-07-17 12:54:26	NO001		25.14		3.814		21.33		6.533		18.61		9.136		16		0.015		0.169		1.54
16	CP288	86	Prod	1179	82	1009	25	NO001	NO001	World	11638	Measurements	0	7008	MEASUREMENTS	Measurements	21		53045	Skin discolouration	0		196256	32	2020-07-13 17:32:35	2020-07-13 17:32:35	2020-07-17 12:54:26	NO001		17.24		1.364		15.87		2.834		14.4		3.768		13.47		0.001		0.259		1.823
16	CP288	86	Prod	1179	82	1009	25	NO001	NO001	World	11638	Measurements	0	7008	MEASUREMENTS	Measurements	21		53045	Skin discolouration	0		196257	33	2020-07-13 17:32:35	2020-07-13 17:32:35	2020-07-17 12:54:26	NO001		24.96		6.771		18.19		13.05		11.91		16.73		8.229		0		0.017		3.675
16	CP288	86	Prod	1179	82	1009	25	NO001	NO001	World	11638	Measurements	0	7008	MEASUREMENTS	Measurements	21		53045	Skin discolouration	0		196258	34	2020-07-13 17:32:35	2020-07-13 17:32:35	2020-07-17 12:54:26	NO001		23.63		1.891		21.74		3.245		20.38		4.69		18.94		0.001		0.684		6.721
16	CP288	86	Prod	1179	82	1009	25	NO001	NO001	World	11638	Measurements	0	7008	MEASUREMENTS	Measurements	21		53045	Skin discolouration	0		196259	35	2020-07-13 17:32:35	2020-07-13 17:32:35	2020-07-17 12:54:26	NO001		33.95		6.125		27.83		11.45		22.5		16.22		17.73		0.002		0.046		0.382
16	CP288	86	Prod	1179	82	1009	25	NO001	NO001	World	11638	Measurements	0	7008	MEASUREMENTS	Measurements	21		53045	Skin discolouration	0		196260	36	2020-07-13 17:32:35	2020-07-13 17:32:35	2020-07-17 12:54:26	NO001		18.72		3.187		15.53		5.179		13.54		5.567		13.15		0.11		1.973		5.738
16	CP288	86	Prod	1180	82	1010	25	NO001	NO001	World	11669	Measurements	0	7008	MEASUREMENTS	Measurements	21		53105	Skin discolouration	0		138342	1	2020-07-13 17:32:33	2020-07-13 17:32:33	2020-07-17 12:54:26	NO001		15.26		4.397		10.86		8.905		6.355		11.87		3.391		0		0		0.141
16	CP288	86	Prod	1180	82	1010	25	NO001	NO001	World	11669	Measurements	0	7008	MEASUREMENTS	Measurements	21		53105	Skin discolouration	0		196206	2	2020-07-13 17:32:33	2020-07-13 17:32:33	2020-07-17 12:54:26	NO001		13.48		5.033		8.456		8.078		5.41		9.733		3.755		0		0		0
16	CP288	86	Prod	1180	82	1010	25	NO001	NO001	World	11669	Measurements	0	7008	MEASUREMENTS	Measurements	21		53105	Skin discolouration	0		196207	3	2020-07-13 17:32:33	2020-07-13 17:32:33	2020-07-17 12:54:26	NO001		29.13		3.994		25.14		8.902		20.23		14.58		14.55		0.01		0.058		0.325
16	CP288	86	Prod	1180	82	1010	25	NO001	NO001	World	11669	Measurements	0	7008	MEASUREMENTS	Measurements	21		53105	Skin discolouration	0		196208	4	2020-07-13 17:32:33	2020-07-13 17:32:33	2020-07-17 12:54:26	NO001		36.28		4.946		31.33		10.41		25.86		15.5		20.78		0		0.001		0.009
16	CP288	86	Prod	1180	82	1010	25	NO001	NO001	World	11669	Measurements	0	7008	MEASUREMENTS	Measurements	21		53105	Skin discolouration	0		196209	5	2020-07-13 17:32:33	2020-07-13 17:32:33	2020-07-17 12:54:26	NO001		18.18		4.664		13.52		8.984		9.2		12.66		5.517		0		0		0.015
16	CP288	86	Prod	1180	82	1010	25	NO001	NO001	World	11669	Measurements	0	7008	MEASUREMENTS	Measurements	21		53105	Skin discolouration	0		196210	6	2020-07-13 17:32:33	2020-07-13 17:32:33	2020-07-17 12:54:26	NO001		20.57		5.618		14.95		8.135		12.43		8.417		12.15		0.016		0.346		2.204
16	CP288	86	Prod	1183	93	5001	29	Fondazione Poliambulanza Istituto Ospedaliero	IT001	World	11726	Measurements	0	7008	MEASUREMENTS	Measurements	21		53343	Skin discolouration	0		195015	33	2020-07-09 17:31:52	2020-07-09 18:06:13	2020-07-17 12:54:26	IT001		7.92		0.844		7.079		1.587		6.337		2.952		4.972		0.101		0.832		1.38
16	CP288	86	Prod	1183	93	5001	29	Fondazione Poliambulanza Istituto Ospedaliero	IT001	World	11726	Measurements	0	7008	MEASUREMENTS	Measurements	21		53343	Skin discolouration	0		195016	34	2020-07-09 17:31:52	2020-07-09 18:06:13	2020-07-17 12:54:26	IT001		1.65		0.324		1.335		0.324		1.335		0.324		1.335		0		0		0.001
16	CP288	86	Prod	1183	93	5001	29	Fondazione Poliambulanza Istituto Ospedaliero	IT001	World	11726	Measurements	0	7008	MEASUREMENTS	Measurements	21		53343	Skin discolouration	0		195017	35	2020-07-09 17:31:52	2020-07-09 18:06:13	2020-07-17 12:54:26	IT001		10.4		1.871		8.536		2.66		7.747		3.131		7.276		0		0		0.049
16	CP288	86	Prod	1183	93	5001	29	Fondazione Poliambulanza Istituto Ospedaliero	IT001	World	11726	Measurements	0	7008	MEASUREMENTS	Measurements	21		53343	Skin discolouration	0		195018	36	2020-07-09 17:31:52	2020-07-09 18:06:13	2020-07-17 12:54:26	IT001		1.05		1.055		0		1.055		0		1.055		0		0		0.007		0.269
16	CP288	86	Prod	1183	93	5001	29	Fondazione Poliambulanza Istituto Ospedaliero	IT001	World	11726	Measurements	0	7008	MEASUREMENTS	Measurements	21		53343	Skin discolouration	0		195019	37	2020-07-09 17:31:52	2020-07-09 18:06:13	2020-07-17 12:54:26	IT001		4.18		0.504		3.68		0.504		3.68		0.504		3.68		0		0		0
16	CP288	86	Prod	1183	93	5001	29	Fondazione Poliambulanza Istituto Ospedaliero	IT001	World	11726	Measurements	0	7008	MEASUREMENTS	Measurements	21		53343	Skin discolouration	0		195020	38	2020-07-09 17:31:52	2020-07-09 18:06:13	2020-07-17 12:54:26	IT001		11.24		2.293		8.956		3.417		7.832		4.61		6.639		0		0.001		0.162
16	CP288	86	Prod	1183	93	5001	29	Fondazione Poliambulanza Istituto Ospedaliero	IT001	World	11726	Measurements	0	7008	MEASUREMENTS	Measurements	21		53343	Skin discolouration	0		195021	39	2020-07-09 17:31:52	2020-07-09 18:06:13	2020-07-17 12:54:26	IT001		8.33		1.503		6.829		3.372		4.961		5.878		2.455		0		0		0
16	CP288	86	Prod	1183	93	5001	29	Fondazione Poliambulanza Istituto Ospedaliero	IT001	World	11726	Measurements	0	7008	MEASUREMENTS	Measurements	21		53343	Skin discolouration	0		195022	40	2020-07-09 17:31:52	2020-07-09 18:06:13	2020-07-17 12:54:26	IT001		4.55		2.119		2.439		2.346		2.212		2.888		1.67		0		0		0.028
16	CP288	86	Prod	1183	93	5001	29	Fondazione Poliambulanza Istituto Ospedaliero	IT001	World	11726	Measurements	0	7008	MEASUREMENTS	Measurements	21		53343	Skin discolouration	0		195023	41	2020-07-09 17:31:52	2020-07-09 18:06:13	2020-07-17 12:54:26	IT001		21.21		4.544		16.67		9.479		11.73		15.09		6.118		0		0.012		0.437
16	CP288	86	Prod	1183	93	5001	29	Fondazione Poliambulanza Istituto Ospedaliero	IT001	World	11726	Measurements	0	7008	MEASUREMENTS	Measurements	21		53343	Skin discolouration	0		195024	42	2020-07-09 17:31:52	2020-07-09 18:06:13	2020-07-17 12:54:26	IT001		14.7		0.921		13.78		1.088		13.61		2.614		12.09		0		0		0.064
16	CP288	86	Prod	1183	93	5001	29	Fondazione Poliambulanza Istituto Ospedaliero	IT001	World	11726	Measurements	0	7008	MEASUREMENTS	Measurements	21		53343	Skin discolouration	0		195025	43	2020-07-09 17:31:52	2020-07-09 18:06:13	2020-07-17 12:54:26	IT001		41.42		3.1		38.32		6.332		35.09		11.03		30.39		0		0		0.09
16	CP288	86	Prod	1183	93	5001	29	Fondazione Poliambulanza Istituto Ospedaliero	IT001	World	11726	Measurements	0	7008	MEASUREMENTS	Measurements	21		53343	Skin discolouration	0		195026	44	2020-07-09 17:31:52	2020-07-09 18:06:13	2020-07-17 12:54:26	IT001		7.1		0.617		6.485		1.749		5.354		3.38		3.723		0		0		0
16	CP288	86	Prod	1183	93	5001	29	Fondazione Poliambulanza Istituto Ospedaliero	IT001	World	11726	Measurements	0	7008	MEASUREMENTS	Measurements	21		53343	Skin discolouration	0		195027	45	2020-07-09 17:31:52	2020-07-09 18:06:13	2020-07-17 12:54:26	IT001		42.99		4.421		38.56		9.071		33.91		14.21		28.78		0		0		0.238
16	CP288	86	Prod	1183	93	5001	29	Fondazione Poliambulanza Istituto Ospedaliero	IT001	World	11726	Measurements	0	7008	MEASUREMENTS	Measurements	21		53343	Skin discolouration	0		195028	46	2020-07-09 17:31:52	2020-07-09 18:06:13	2020-07-17 12:54:26	IT001		17.09		2.953		14.13		5.115		11.97		7.107		9.984		0		0		0
16	CP288	86	Prod	1183	93	5001	29	Fondazione Poliambulanza Istituto Ospedaliero	IT001	World	11726	Measurements	0	7008	MEASUREMENTS	Measurements	21		53343	Skin discolouration	0		195029	47	2020-07-09 17:31:52	2020-07-09 18:06:13	2020-07-17 12:54:26	IT001		22.51		3.596		18.92		5.7		16.81		8.105		14.41		0		0.009		0.07
16	CP288	86	Prod	1183	93	5001	29	Fondazione Poliambulanza Istituto Ospedaliero	IT001	World	11726	Measurements	0	7008	MEASUREMENTS	Measurements	21		53343	Skin discolouration	0		195030	48	2020-07-09 17:31:52	2020-07-09 18:06:13	2020-07-17 12:54:26	IT001		16.56		1.521		15.04		2.917		13.64		5.291		11.27		0		0		0.013
16	CP288	86	Prod	1183	93	5001	29	Fondazione Poliambulanza Istituto Ospedaliero	IT001	World	11726	Measurements	0	7008	MEASUREMENTS	Measurements	21		53343	Skin discolouration	0		195031	49	2020-07-09 17:31:52	2020-07-09 18:06:13	2020-07-17 12:54:26	IT001		10.67		0.92		9.756		1.841		8.835		2.888		7.787		0		0		0
16	CP288	86	Prod	1183	93	5001	29	Fondazione Poliambulanza Istituto Ospedaliero	IT001	World	11726	Measurements	0	7008	MEASUREMENTS	Measurements	21		53343	Skin discolouration	0		195032	50	2020-07-09 17:31:52	2020-07-09 18:06:13	2020-07-17 12:54:26	IT001		7.02		1.513		5.514		2.454		4.573		3.355		3.673		0		0		0.009
16	CP288	86	Prod	1183	93	5001	29	Fondazione Poliambulanza Istituto Ospedaliero	IT001	World	11726	Measurements	0	7008	MEASUREMENTS	Measurements	21		53343	Skin discolouration	0		195033	51	2020-07-09 17:31:52	2020-07-09 18:06:13	2020-07-17 12:54:26	IT001		35.11		3.635		31.48		7.499		27.61		11.47		23.64		0		0		0.964
16	CP288	86	Prod	1183	93	5001	29	Fondazione Poliambulanza Istituto Ospedaliero	IT001	World	11726	Measurements	0	7008	MEASUREMENTS	Measurements	21		53343	Skin discolouration	0		195034	52	2020-07-09 17:31:52	2020-07-09 18:06:13	2020-07-17 12:54:26	IT001		1.48		1.477		0.004		1.481		0		1.481		0		0		0.005		0.059
16	CP288	86	Prod	1183	93	5001	29	Fondazione Poliambulanza Istituto Ospedaliero	IT001	World	11726	Measurements	0	7008	MEASUREMENTS	Measurements	21		53343	Skin discolouration	0		195035	53	2020-07-09 17:31:52	2020-07-09 18:06:13	2020-07-17 12:54:26	IT001		6.57		0.763		5.811		1.318		5.256		2.184		4.39		0		0.002		0.033
16	CP288	86	Prod	1183	93	5001	29	Fondazione Poliambulanza Istituto Ospedaliero	IT001	World	11726	Measurements	0	7008	MEASUREMENTS	Measurements	21		53343	Skin discolouration	0		195036	54	2020-07-09 17:31:52	2020-07-09 18:06:14	2020-07-17 12:54:26	IT001		40.61		3.668		36.95		8.076		32.54		13.1		27.51		0		0		0.262
16	CP288	86	Prod	1183	93	5001	29	Fondazione Poliambulanza Istituto Ospedaliero	IT001	World	11726	Measurements	0	7008	MEASUREMENTS	Measurements	21		53343	Skin discolouration	0		195037	55	2020-07-09 17:31:52	2020-07-09 18:06:14	2020-07-17 12:54:26	IT001		13.17		1.154		12.02		1.947		11.22		2.674		10.5		0		0		0
16	CP288	86	Prod	1183	93	5001	29	Fondazione Poliambulanza Istituto Ospedaliero	IT001	World	11726	Measurements	0	7008	MEASUREMENTS	Measurements	21		53343	Skin discolouration	0		195038	56	2020-07-09 17:31:52	2020-07-09 18:06:14	2020-07-17 12:54:26	IT001		18.67		1.797		16.87		3.46		15.21		6.605		12.06		0		0		0
16	CP288	86	Prod	1183	93	5001	29	Fondazione Poliambulanza Istituto Ospedaliero	IT001	World	11726	Measurements	0	7008	MEASUREMENTS	Measurements	21		53343	Skin discolouration	0		195039	57	2020-07-09 17:31:52	2020-07-09 18:06:14	2020-07-17 12:54:26	IT001		16.5		3.118		13.38		6.754		9.753		11.12		5.385		0		0.023		0.913
16	CP288	86	Prod	1183	93	5001	29	Fondazione Poliambulanza Istituto Ospedaliero	IT001	World	11726	Measurements	0	7008	MEASUREMENTS	Measurements	21		53343	Skin discolouration	0		195040	58	2020-07-09 17:31:52	2020-07-09 18:06:14	2020-07-17 12:54:26	IT001		51		3.9		47.1		7.025		43.97		12.19		38.8		0		0		0.352
16	CP288	86	Prod	1183	93	5001	29	Fondazione Poliambulanza Istituto Ospedaliero	IT001	World	11726	Measurements	0	7008	MEASUREMENTS	Measurements	21		53343	Skin discolouration	0		195041	59	2020-07-09 17:31:52	2020-07-09 18:06:14	2020-07-17 12:54:26	IT001		15.55		0.783		14.77		2.181		13.37		4.607		10.95		0		0		0.024
16	CP288	86	Prod	1183	93	5001	29	Fondazione Poliambulanza Istituto Ospedaliero	IT001	World	11726	Measurements	0	7008	MEASUREMENTS	Measurements	21		53343	Skin discolouration	0		195042	60	2020-07-09 17:31:52	2020-07-09 18:06:14	2020-07-17 12:54:26	IT001		2.75		1.779		0.976		2.496		0.258		2.576		0.179		0		0.034		1.152
16	CP288	86	Prod	1183	93	5001	29	Fondazione Poliambulanza Istituto Ospedaliero	IT001	World	11726	Measurements	0	7008	MEASUREMENTS	Measurements	21		53343	Skin discolouration	0		195043	61	2020-07-09 17:31:52	2020-07-09 18:06:14	2020-07-17 12:54:26	IT001		2.25		1.435		0.823		1.435		0.823		1.435		0.823		0		0		0
16	CP288	86	Prod	1183	93	5001	29	Fondazione Poliambulanza Istituto Ospedaliero	IT001	World	11726	Measurements	0	7008	MEASUREMENTS	Measurements	21		53343	Skin discolouration	0		195044	62	2020-07-09 17:31:52	2020-07-09 18:06:14	2020-07-17 12:54:26	IT001		9.62		2.611		7.018		3.57		6.058		4.521		5.108		0		0.003		0.126
16	CP288	86	Prod	1183	93	5001	29	Fondazione Poliambulanza Istituto Ospedaliero	IT001	World	11726	Measurements	0	7008	MEASUREMENTS	Measurements	21		53343	Skin discolouration	0		195045	63	2020-07-09 17:31:52	2020-07-09 18:06:14	2020-07-17 12:54:26	IT001		16.82		1.789		15.04		3.661		13.16		6.304		10.52		0		0.009		0.324
16	CP288	86	Prod	1183	93	5001	29	Fondazione Poliambulanza Istituto Ospedaliero	IT001	World	11726	Measurements	0	7008	MEASUREMENTS	Measurements	21		53343	Skin discolouration	0		195046	64	2020-07-09 17:31:52	2020-07-09 18:06:14	2020-07-17 12:54:26	IT001		30.34		2.024		28.32		3.901		26.44		6.277		24.06		0		0		0.037
16	CP288	86	Prod	1184	93	5002	29	Fondazione Poliambulanza Istituto Ospedaliero	IT001	World	11757	Measurements	0	7008	MEASUREMENTS	Measurements	21		53403	Skin discolouration	0		195001	15	2020-07-09 17:31:51	2020-07-09 17:31:51	2020-07-17 12:54:26	IT001		10.64		5.367		5.277		8.881		1.763		10.46		0.177		0.279		0.463		1.142
16	CP288	86	Prod	1184	93	5002	29	Fondazione Poliambulanza Istituto Ospedaliero	IT001	World	11757	Measurements	0	7008	MEASUREMENTS	Measurements	21		53403	Skin discolouration	0		195002	16	2020-07-09 17:31:51	2020-07-09 17:31:51	2020-07-17 12:54:26	IT001		76.61		16.48		60.13		28.04		48.57		39.54		37.07		0		0		0.004
16	CP288	86	Prod	1184	93	5002	29	Fondazione Poliambulanza Istituto Ospedaliero	IT001	World	11757	Measurements	0	7008	MEASUREMENTS	Measurements	21		53403	Skin discolouration	0		195003	17	2020-07-09 17:31:51	2020-07-09 17:31:51	2020-07-17 12:54:26	IT001		23.67		14.61		9.064		18.87		4.807		22.15		1.526		0.003		0.003		0.014
16	CP288	86	Prod	1184	93	5002	29	Fondazione Poliambulanza Istituto Ospedaliero	IT001	World	11757	Measurements	0	7008	MEASUREMENTS	Measurements	21		53403	Skin discolouration	0		195004	18	2020-07-09 17:31:51	2020-07-09 17:31:51	2020-07-17 12:54:26	IT001		63.01		5.84		57.17		11.97		51.03		18.92		44.08		0		0		0.001
16	CP288	86	Prod	1184	93	5002	29	Fondazione Poliambulanza Istituto Ospedaliero	IT001	World	11757	Measurements	0	7008	MEASUREMENTS	Measurements	21		53403	Skin discolouration	0		195005	19	2020-07-09 17:31:51	2020-07-09 17:31:51	2020-07-17 12:54:26	IT001		64.07		25.34		38.72		39.55		24.51		48.58		15.48		0.001		0.001		0
16	CP288	86	Prod	1184	93	5002	29	Fondazione Poliambulanza Istituto Ospedaliero	IT001	World	11757	Measurements	0	7008	MEASUREMENTS	Measurements	21		53403	Skin discolouration	0		195006	20	2020-07-09 17:31:51	2020-07-09 17:31:51	2020-07-17 12:54:26	IT001		75.88		7.925		67.95		15.38		60.49		23.95		51.92		0.139		0.225		0.279
16	CP288	86	Prod	1184	93	5002	29	Fondazione Poliambulanza Istituto Ospedaliero	IT001	World	11757	Measurements	0	7008	MEASUREMENTS	Measurements	21		53403	Skin discolouration	0		195007	21	2020-07-09 17:31:51	2020-07-09 17:31:51	2020-07-17 12:54:26	IT001		65.32		16.04		49.28		26.76		38.55		36.84		28.47		0		0.001		0.004
16	CP288	86	Prod	1184	93	5002	29	Fondazione Poliambulanza Istituto Ospedaliero	IT001	World	11757	Measurements	0	7008	MEASUREMENTS	Measurements	21		53403	Skin discolouration	0		195008	22	2020-07-09 17:31:51	2020-07-09 17:31:51	2020-07-17 12:54:26	IT001		78.11		10.6		67.51		20.49		57.62		31.94		46.17		2.06		2.904		3.088
16	CP288	86	Prod	1184	93	5002	29	Fondazione Poliambulanza Istituto Ospedaliero	IT001	World	11757	Measurements	0	7008	MEASUREMENTS	Measurements	21		53403	Skin discolouration	0		195009	23	2020-07-09 17:31:51	2020-07-09 17:31:51	2020-07-17 12:54:26	IT001		69.47		15.9		53.56		26.75		42.71		37.73		31.74		0		0.002		0.011
16	CP288	86	Prod	1184	93	5002	29	Fondazione Poliambulanza Istituto Ospedaliero	IT001	World	11757	Measurements	0	7008	MEASUREMENTS	Measurements	21		53403	Skin discolouration	0		195010	24	2020-07-09 17:31:51	2020-07-09 17:31:51	2020-07-17 12:54:26	IT001		26.29		1.918		24.38		2.14		24.15		2.208		24.09		0.003		0.009		0.007
16	CP288	86	Prod	1184	93	5002	29	Fondazione Poliambulanza Istituto Ospedaliero	IT001	World	11757	Measurements	0	7008	MEASUREMENTS	Measurements	21		53403	Skin discolouration	0		195011	25	2020-07-09 17:31:51	2020-07-09 17:31:51	2020-07-17 12:54:26	IT001		70.18		18.79		51.38		27.97		42.21		35.84		34.34		0.01		0.038		0.129
16	CP288	86	Prod	1184	93	5002	29	Fondazione Poliambulanza Istituto Ospedaliero	IT001	World	11757	Measurements	0	7008	MEASUREMENTS	Measurements	21		53403	Skin discolouration	0		195012	26	2020-07-09 17:31:51	2020-07-09 17:31:51	2020-07-17 12:54:26	IT001		74.86		27.57		47.28		36.11		38.74		43.4		31.46		0		0.003		0.007
16	CP288	86	Prod	1184	93	5002	29	Fondazione Poliambulanza Istituto Ospedaliero	IT001	World	11757	Measurements	0	7008	MEASUREMENTS	Measurements	21		53403	Skin discolouration	0		195013	27	2020-07-09 17:31:51	2020-07-09 17:31:51	2020-07-17 12:54:26	IT001		68.36		9.631		58.73		18.96		49.4		29.26		39.1		0.006		0.008		0.013
16	CP288	86	Prod	1184	93	5002	29	Fondazione Poliambulanza Istituto Ospedaliero	IT001	World	11757	Measurements	0	7008	MEASUREMENTS	Measurements	21		53403	Skin discolouration	0		195014	28	2020-07-09 17:31:51	2020-07-09 17:31:51	2020-07-17 12:54:26	IT001		69.49		13.14		56.35		25.17		44.32		38.68		30.81		0.01		0.013		0.019
16	CP288	86	Prod	1188	80	2076	24	Sanitätshaus Fürst GmbH	DE003	World	11881	Measurements	0	7008	MEASUREMENTS	Measurements	21		53643	Skin discolouration	0		139181	1	2020-07-14 08:38:19	2020-07-14 08:38:19	2020-07-17 12:54:26	DE003		5.31		2.217		3.095		3.2		2.112		4.089		1.223		0		0		0.03
16	CP288	86	Prod	1188	80	2076	24	Sanitätshaus Fürst GmbH	DE003	World	11881	Measurements	0	7008	MEASUREMENTS	Measurements	21		53643	Skin discolouration	0		197349	2	2020-07-14 08:38:19	2020-07-14 08:38:19	2020-07-17 12:54:26	DE003		9.44		5.479		3.97		8.237		1.212		8.867		0.581		0		0.017		0.329
16	CP288	86	Prod	1188	80	2076	24	Sanitätshaus Fürst GmbH	DE003	World	11881	Measurements	0	7008	MEASUREMENTS	Measurements	21		53643	Skin discolouration	0		197350	3	2020-07-14 08:38:19	2020-07-14 08:38:19	2020-07-17 12:54:26	DE003		8.16		0.991		7.176		1.326		6.841		3.617		4.55		0.002		0.073		0.483
16	CP288	86	Prod	1188	80	2076	24	Sanitätshaus Fürst GmbH	DE003	World	11881	Measurements	0	7008	MEASUREMENTS	Measurements	21		53643	Skin discolouration	0		197351	4	2020-07-14 08:38:19	2020-07-14 08:38:19	2020-07-17 12:54:26	DE003		5.47		2.529		2.942		3.544		1.927		4.407		1.064		0.006		0.117		1.205
16	CP288	86	Prod	1188	80	2076	24	Sanitätshaus Fürst GmbH	DE003	World	11881	Measurements	0	7008	MEASUREMENTS	Measurements	21		53643	Skin discolouration	0		197352	5	2020-07-14 08:38:19	2020-07-14 08:38:19	2020-07-17 12:54:26	DE003		4.5		2.807		1.703		3.988		0.522		0.006		4.504		0		0.002		0.038
16	CP288	86	Prod	1188	80	2076	24	Sanitätshaus Fürst GmbH	DE003	World	11881	Measurements	0	7008	MEASUREMENTS	Measurements	21		53643	Skin discolouration	0		197353	6	2020-07-14 08:38:19	2020-07-14 08:38:19	2020-07-17 12:54:26	DE003		5.98		2.967		3.018		0.094		5.89		0.056		5.928		0.004		0.093		0.815
16	CP288	86	Prod	1188	80	2076	24	Sanitätshaus Fürst GmbH	DE003	World	11881	Measurements	0	7008	MEASUREMENTS	Measurements	21		53643	Skin discolouration	0		197354	7	2020-07-14 08:38:19	2020-07-14 08:38:19	2020-07-17 12:54:26	DE003		8.92		6.253		2.667		7.324		1.596		0.118		8.802		0		0.041		0.396
16	CP288	86	Prod	1188	80	2076	24	Sanitätshaus Fürst GmbH	DE003	World	11881	Measurements	0	7008	MEASUREMENTS	Measurements	21		53643	Skin discolouration	0		197355	8	2020-07-14 08:38:19	2020-07-14 08:38:19	2020-07-17 12:54:26	DE003		6.51		3.418		3.099		5.135		1.381		0.04		6.477		0.012		0.429		1.252
16	CP288	86	Prod	1188	80	2076	24	Sanitätshaus Fürst GmbH	DE003	World	11881	Measurements	0	7008	MEASUREMENTS	Measurements	21		53643	Skin discolouration	0		197356	9	2020-07-14 08:38:19	2020-07-14 08:38:19	2020-07-17 12:54:26	DE003		8.74		3.14		5.6		5.265		3.475		6.667		2.073		0.002		0.327		2.184
16	CP288	86	Prod	1188	80	2076	24	Sanitätshaus Fürst GmbH	DE003	World	11881	Measurements	0	7008	MEASUREMENTS	Measurements	21		53643	Skin discolouration	0		197357	10	2020-07-14 08:38:19	2020-07-14 08:38:19	2020-07-17 12:54:26	DE003		8.42		2.728		5.701		4.474		3.955		5.551		2.878		0.005		0.043		0.588
16	CP288	86	Prod	1188	80	2076	24	Sanitätshaus Fürst GmbH	DE003	World	11881	Measurements	0	7008	MEASUREMENTS	Measurements	21		53643	Skin discolouration	0		197358	11	2020-07-14 08:38:19	2020-07-14 08:38:19	2020-07-17 12:54:26	DE003		10.58		3.792		6.796		6.133		4.456		7.551		3.037		0.001		0.005		0.038
16	CP288	86	Prod	1188	80	2076	24	Sanitätshaus Fürst GmbH	DE003	World	11881	Measurements	0	7008	MEASUREMENTS	Measurements	21		53643	Skin discolouration	0		197359	12	2020-07-14 08:38:19	2020-07-14 08:38:19	2020-07-17 12:54:26	DE003		0		0		0		0		0		0		0		0		0		0
16	CP288	86	Prod	1188	80	2076	24	Sanitätshaus Fürst GmbH	DE003	World	11881	Measurements	0	7008	MEASUREMENTS	Measurements	21		53643	Skin discolouration	0		197360	13	2020-07-14 08:38:19	2020-07-14 08:38:19	2020-07-17 12:54:26	DE003		16.17		4.351		11.82		5.247		10.92		7.259		8.913		0		0.002		0.004
16	CP288	86	Prod	1188	80	2076	24	Sanitätshaus Fürst GmbH	DE003	World	11881	Measurements	0	7008	MEASUREMENTS	Measurements	21		53643	Skin discolouration	0		197361	14	2020-07-14 08:38:19	2020-07-14 08:38:19	2020-07-17 12:54:26	DE003		4.51		2.258		2.26		3.264		1.254		3.439		1.079		0		0.077		0.508
16	CP288	86	Prod	1188	80	2076	24	Sanitätshaus Fürst GmbH	DE003	World	11881	Measurements	0	7008	MEASUREMENTS	Measurements	21		53643	Skin discolouration	0		197362	15	2020-07-14 08:38:19	2020-07-14 08:38:19	2020-07-17 12:54:26	DE003		8.9		6.185		2.724		7.638		1.271		8.164		0.746		0.004		0.017		0.172
16	CP288	86	Prod	1188	80	2076	24	Sanitätshaus Fürst GmbH	DE003	World	11881	Measurements	0	7008	MEASUREMENTS	Measurements	21		53643	Skin discolouration	0		197363	16	2020-07-14 08:38:19	2020-07-14 08:38:19	2020-07-17 12:54:26	DE003		7.25		2.3		4.953		3.114		4.139		3.497		3.756		0		0.033		1.463
16	CP288	86	Prod	1188	80	2076	24	Sanitätshaus Fürst GmbH	DE003	World	11881	Measurements	0	7008	MEASUREMENTS	Measurements	21		53643	Skin discolouration	0		197364	17	2020-07-14 08:38:19	2020-07-14 08:38:19	2020-07-17 12:54:26	DE003		3.8		2.127		1.676		2.568		1.235		2.654		1.149		0		0		0
16	CP288	86	Prod	1188	80	2076	24	Sanitätshaus Fürst GmbH	DE003	World	11881	Measurements	0	7008	MEASUREMENTS	Measurements	21		53643	Skin discolouration	0		197365	18	2020-07-14 08:38:19	2020-07-14 08:38:19	2020-07-17 12:54:26	DE003		17.3		3.979		13.32		5.751		11.55		8.614		8.687		0		0.001		0.013
16	CP288	86	Prod	1188	80	2076	24	Sanitätshaus Fürst GmbH	DE003	World	11881	Measurements	0	7008	MEASUREMENTS	Measurements	21		53643	Skin discolouration	0		197366	19	2020-07-14 08:38:19	2020-07-14 08:38:19	2020-07-17 12:54:26	DE003		12.72		5.166		7.555		7.221		5.5		9.556		3.165		0.101		0.494		0.756
16	CP288	86	Prod	1188	80	2076	24	Sanitätshaus Fürst GmbH	DE003	World	11881	Measurements	0	7008	MEASUREMENTS	Measurements	21		53643	Skin discolouration	0		197367	20	2020-07-14 08:38:19	2020-07-14 08:38:19	2020-07-17 12:54:26	DE003		6.41		3.787		2.63		5.51		0.907		5.968		0.449		0.002		0.038		0.393
16	CP288	86	Prod	1188	80	2076	24	Sanitätshaus Fürst GmbH	DE003	World	11881	Measurements	0	7008	MEASUREMENTS	Measurements	21		53643	Skin discolouration	0		197368	21	2020-07-14 08:38:19	2020-07-14 08:38:19	2020-07-17 12:54:26	DE003		10.17		2.642		7.535		4.437		5.741		6.477		3.7		0.012		0.201		2.08
16	CP288	86	Prod	1188	80	2076	24	Sanitätshaus Fürst GmbH	DE003	World	11881	Measurements	0	7008	MEASUREMENTS	Measurements	21		53643	Skin discolouration	0		197369	22	2020-07-14 08:38:19	2020-07-14 08:38:19	2020-07-17 12:54:26	DE003		8.27		3.764		4.516		4.689		3.59		5.641		2.638		0.001		0.012		0.377
16	CP288	86	Prod	1188	80	2076	24	Sanitätshaus Fürst GmbH	DE003	World	11881	Measurements	0	7008	MEASUREMENTS	Measurements	21		53643	Skin discolouration	0		197370	23	2020-07-14 08:38:19	2020-07-14 08:38:19	2020-07-17 12:54:26	DE003		7.08		2.111		4.974		2.875		4.211		3.052		4.033		0.006		0.243		1.115
16	CP288	86	Prod	1188	80	2076	24	Sanitätshaus Fürst GmbH	DE003	World	11881	Measurements	0	7008	MEASUREMENTS	Measurements	21		53643	Skin discolouration	0		197371	24	2020-07-14 08:38:19	2020-07-14 08:38:19	2020-07-17 12:54:26	DE003		3.99		1.048		2.95		1.735		2.263		2.212		1.786		0		0.004		0.243
16	CP288	86	Prod	1188	80	2076	24	Sanitätshaus Fürst GmbH	DE003	World	11881	Measurements	0	7008	MEASUREMENTS	Measurements	21		53643	Skin discolouration	0		197372	25	2020-07-14 08:38:19	2020-07-14 08:38:19	2020-07-17 12:54:26	DE003		4.87		0.806		4.07		1.083		3.793		3.181		1.694		0.001		0.021		0.198
16	CP288	86	Prod	1188	80	2076	24	Sanitätshaus Fürst GmbH	DE003	World	11881	Measurements	0	7008	MEASUREMENTS	Measurements	21		53643	Skin discolouration	0		197373	26	2020-07-14 08:38:19	2020-07-14 08:38:19	2020-07-17 12:54:26	DE003		5.2		1.948		3.26		2.436		2.772		3.332		1.875		0.076		0.205		0.845
16	CP288	86	Prod	1188	80	2076	24	Sanitätshaus Fürst GmbH	DE003	World	11881	Measurements	0	7008	MEASUREMENTS	Measurements	21		53643	Skin discolouration	0		197374	27	2020-07-14 08:38:19	2020-07-14 08:38:19	2020-07-17 12:54:26	DE003		10.49		8.03		2.466		0.293		10.2		0.182		10.31		0		0.113		0.302
16	CP288	86	Prod	1188	80	2076	24	Sanitätshaus Fürst GmbH	DE003	World	11881	Measurements	0	7008	MEASUREMENTS	Measurements	21		53643	Skin discolouration	0		197375	28	2020-07-14 08:38:19	2020-07-14 08:38:19	2020-07-17 12:54:26	DE003		4.28		2.915		1.375		3.485		0.805		3.576		0.713		0		0		0
16	CP288	86	Prod	1188	80	2076	24	Sanitätshaus Fürst GmbH	DE003	World	11881	Measurements	0	7008	MEASUREMENTS	Measurements	21		53643	Skin discolouration	0		197376	29	2020-07-14 08:38:19	2020-07-14 08:38:19	2020-07-17 12:54:26	DE003		5.85		2.901		2.958		3.925		1.934		4.095		1.764		0.005		0.024		0.252
16	CP288	86	Prod	1188	80	2076	24	Sanitätshaus Fürst GmbH	DE003	World	11881	Measurements	0	7008	MEASUREMENTS	Measurements	21		53643	Skin discolouration	0		197377	30	2020-07-14 08:38:19	2020-07-14 08:38:19	2020-07-17 12:54:26	DE003		9.7		3.081		6.625		5.59		4.116		0.098		9.609		0		0.002		0.361
16	CP288	86	Prod	1188	80	2076	24	Sanitätshaus Fürst GmbH	DE003	World	11881	Measurements	0	7008	MEASUREMENTS	Measurements	21		53643	Skin discolouration	0		197378	31	2020-07-14 08:38:19	2020-07-14 08:38:19	2020-07-17 12:54:26	DE003		6.9		2.002		4.902		3.149		3.755		4.323		2.581		0		0.001		0.213
16	CP288	86	Prod	1188	80	2076	24	Sanitätshaus Fürst GmbH	DE003	World	11881	Measurements	0	7008	MEASUREMENTS	Measurements	21		53643	Skin discolouration	0		197379	32	2020-07-14 08:38:19	2020-07-14 08:38:19	2020-07-17 12:54:26	DE003		5.66		1.98		3.685		2.943		2.722		3.553		2.112		0.01		0.518		1.565
16	CP288	86	Prod	1189	80	2077	24	Sanitätshaus Fürst GmbH	DE003	World	11912	Measurements	0	7008	MEASUREMENTS	Measurements	21		53703	Skin discolouration	0		139261	1	2020-07-14 08:38:16	2020-07-14 08:38:16	2020-07-17 12:54:26	DE003		1.13		1.124		0.013		1.137		0		1.137		0		0		0		0.011
16	CP288	86	Prod	1189	80	2077	24	Sanitätshaus Fürst GmbH	DE003	World	11912	Measurements	0	7008	MEASUREMENTS	Measurements	21		53703	Skin discolouration	0		197277	2	2020-07-14 08:38:16	2020-07-14 08:38:16	2020-07-17 12:54:26	DE003		3.93		2.559		1.38		3.252		0.686		3.659		0.28		0		0		0
16	CP288	86	Prod	1189	80	2077	24	Sanitätshaus Fürst GmbH	DE003	World	11912	Measurements	0	7008	MEASUREMENTS	Measurements	21		53703	Skin discolouration	0		197278	3	2020-07-14 08:38:16	2020-07-14 08:38:16	2020-07-17 12:54:26	DE003		2.59		1.616		0.978		2.004		0.59		2.102		0.491		0		0		0.005
16	CP288	86	Prod	1189	80	2077	24	Sanitätshaus Fürst GmbH	DE003	World	11912	Measurements	0	7008	MEASUREMENTS	Measurements	21		53703	Skin discolouration	0		197279	4	2020-07-14 08:38:16	2020-07-14 08:38:16	2020-07-17 12:54:26	DE003		2.72		1.129		1.601		1.541		1.189		1.833		0.897		0.024		0.164		0.206
16	CP288	86	Prod	1189	80	2077	24	Sanitätshaus Fürst GmbH	DE003	World	11912	Measurements	0	7008	MEASUREMENTS	Measurements	21		53703	Skin discolouration	0		197280	5	2020-07-14 08:38:16	2020-07-14 08:38:16	2020-07-17 12:54:26	DE003		0.62		0.629		0		0.629		0		0.629		0		0.006		0.025		0.014
16	CP288	86	Prod	1189	80	2077	24	Sanitätshaus Fürst GmbH	DE003	World	11912	Measurements	0	7008	MEASUREMENTS	Measurements	21		53703	Skin discolouration	0		197281	6	2020-07-14 08:38:16	2020-07-14 08:38:16	2020-07-17 12:54:26	DE003		4.15		1.986		2.173		2.858		1.301		3.126		1.033		0.111		0.525		0.431
16	CP288	86	Prod	1189	80	2077	24	Sanitätshaus Fürst GmbH	DE003	World	11912	Measurements	0	7008	MEASUREMENTS	Measurements	21		53703	Skin discolouration	0		197282	7	2020-07-14 08:38:16	2020-07-14 08:38:16	2020-07-17 12:54:26	DE003		0.4		0.392		0.015		0.406		0		0.406		0		0.004		0.012		0.028
16	CP288	86	Prod	1189	80	2077	24	Sanitätshaus Fürst GmbH	DE003	World	11912	Measurements	0	7008	MEASUREMENTS	Measurements	21		53703	Skin discolouration	0		197283	8	2020-07-14 08:38:16	2020-07-14 08:38:16	2020-07-17 12:54:26	DE003		0.58		0.573		0.007		0.581		0		0.581		0		0.033		0.08		0.113
16	CP288	86	Prod	1189	80	2077	24	Sanitätshaus Fürst GmbH	DE003	World	11912	Measurements	0	7008	MEASUREMENTS	Measurements	21		53703	Skin discolouration	0		197284	9	2020-07-14 08:38:16	2020-07-14 08:38:16	2020-07-17 12:54:26	DE003		6.56		3.529		3.037		4.969		1.596		5.806		0.76		0		0		0
16	CP288	86	Prod	1189	80	2077	24	Sanitätshaus Fürst GmbH	DE003	World	11912	Measurements	0	7008	MEASUREMENTS	Measurements	21		53703	Skin discolouration	0		197285	10	2020-07-14 08:38:16	2020-07-14 08:38:16	2020-07-17 12:54:26	DE003		1.17		1.033		0.139		1.082		0.09		1.149		0.023		0.272		0.16		0.087
16	CP288	86	Prod	1189	80	2077	24	Sanitätshaus Fürst GmbH	DE003	World	11912	Measurements	0	7008	MEASUREMENTS	Measurements	21		53703	Skin discolouration	0		197286	11	2020-07-14 08:38:16	2020-07-14 08:38:16	2020-07-17 12:54:26	DE003		2.19		1.991		0.201		2.09		0.102		2.171		0.021		0.001		0.002		0.016
16	CP288	86	Prod	1189	80	2077	24	Sanitätshaus Fürst GmbH	DE003	World	11912	Measurements	0	7008	MEASUREMENTS	Measurements	21		53703	Skin discolouration	0		197287	12	2020-07-14 08:38:16	2020-07-14 08:38:16	2020-07-17 12:54:26	DE003		1.21		0.886		0.325		0.963		0.248		1.036		0.176		0.093		0.167		0.228
16	CP288	86	Prod	1189	80	2077	24	Sanitätshaus Fürst GmbH	DE003	World	11912	Measurements	0	7008	MEASUREMENTS	Measurements	21		53703	Skin discolouration	0		197288	13	2020-07-14 08:38:16	2020-07-14 08:38:16	2020-07-17 12:54:26	DE003		1.62		0.972		0.65		0.978		0.645		1.046		0.576		0		0.006		0.071
16	CP288	86	Prod	1189	80	2077	24	Sanitätshaus Fürst GmbH	DE003	World	11912	Measurements	0	7008	MEASUREMENTS	Measurements	21		53703	Skin discolouration	0		197289	14	2020-07-14 08:38:16	2020-07-14 08:38:16	2020-07-17 12:54:26	DE003		0		0		0		0		0		0		0		0		0		0
16	CP288	86	Prod	1189	80	2077	24	Sanitätshaus Fürst GmbH	DE003	World	11912	Measurements	0	7008	MEASUREMENTS	Measurements	21		53703	Skin discolouration	0		197290	15	2020-07-14 08:38:16	2020-07-14 08:38:16	2020-07-17 12:54:26	DE003		1.2		0.722		0.484		0.847		0.359		0.897		0.308		0.003		0.044		0.067
16	CP288	86	Prod	1189	80	2077	24	Sanitätshaus Fürst GmbH	DE003	World	11912	Measurements	0	7008	MEASUREMENTS	Measurements	21		53703	Skin discolouration	0		197291	16	2020-07-14 08:38:16	2020-07-14 08:38:16	2020-07-17 12:54:26	DE003		2.18		1.266		0.917		1.507		0.676		0.024		2.158		0.04		0.153		0.353
16	CP288	86	Prod	1189	80	2077	24	Sanitätshaus Fürst GmbH	DE003	World	11912	Measurements	0	7008	MEASUREMENTS	Measurements	21		53703	Skin discolouration	0		197292	17	2020-07-14 08:38:16	2020-07-14 08:38:16	2020-07-17 12:54:26	DE003		3.35		2.231		1.119		3.046		0.304		3.303		0.047		0.137		0.31		0.206
16	CP288	86	Prod	1190	80	2078	24	Sanitätshaus Fürst GmbH	DE003	World	11943	Measurements	0	7008	MEASUREMENTS	Measurements	21		53763	Skin discolouration	0		139341	1	2020-07-14 08:38:17	2020-07-14 08:38:17	2020-07-17 12:54:26	DE003		17.9		1.683		16.22		1.992		15.91		2.496		15.41		0.002		0.017		0.228
16	CP288	86	Prod	1190	80	2078	24	Sanitätshaus Fürst GmbH	DE003	World	11943	Measurements	0	7008	MEASUREMENTS	Measurements	21		53763	Skin discolouration	0		197293	2	2020-07-14 08:38:17	2020-07-14 08:38:17	2020-07-17 12:54:26	DE003		37.15		2.805		34.34		6.22		30.93		9.103		28.04		0.001		0.008		0.092
16	CP288	86	Prod	1190	80	2078	24	Sanitätshaus Fürst GmbH	DE003	World	11943	Measurements	0	7008	MEASUREMENTS	Measurements	21		53763	Skin discolouration	0		197294	3	2020-07-14 08:38:17	2020-07-14 08:38:17	2020-07-17 12:54:26	DE003		25.58		4.844		20.74		7.666		17.91		9.479		16.1		0.021		0.145		0.808
16	CP288	86	Prod	1190	80	2078	24	Sanitätshaus Fürst GmbH	DE003	World	11943	Measurements	0	7008	MEASUREMENTS	Measurements	21		53763	Skin discolouration	0		197295	4	2020-07-14 08:38:17	2020-07-14 08:38:17	2020-07-17 12:54:26	DE003		2.82		1.586		1.239		1.829		0.996		1.829		0.996		0		0		0
16	CP288	86	Prod	1190	80	2078	24	Sanitätshaus Fürst GmbH	DE003	World	11943	Measurements	0	7008	MEASUREMENTS	Measurements	21		53763	Skin discolouration	0		197296	5	2020-07-14 08:38:17	2020-07-14 08:38:17	2020-07-17 12:54:26	DE003		22.54		4.364		18.17		7.952		14.59		12.42		10.11		0		0		0
16	CP288	86	Prod	1190	80	2078	24	Sanitätshaus Fürst GmbH	DE003	World	11943	Measurements	0	7008	MEASUREMENTS	Measurements	21		53763	Skin discolouration	0		197297	6	2020-07-14 08:38:17	2020-07-14 08:38:17	2020-07-17 12:54:26	DE003		18.61		6.375		12.23		9.73		8.884		12.16		6.445		0		0		0.007
16	CP288	86	Prod	1190	80	2078	24	Sanitätshaus Fürst GmbH	DE003	World	11943	Measurements	0	7008	MEASUREMENTS	Measurements	21		53763	Skin discolouration	0		197298	7	2020-07-14 08:38:17	2020-07-14 08:38:17	2020-07-17 12:54:26	DE003		28.7		4.833		23.87		9.892		18.81		13.9		14.8		0.306		0.942		2.085
16	CP288	86	Prod	1190	80	2078	24	Sanitätshaus Fürst GmbH	DE003	World	11943	Measurements	0	7008	MEASUREMENTS	Measurements	21		53763	Skin discolouration	0		197299	8	2020-07-14 08:38:17	2020-07-14 08:38:17	2020-07-17 12:54:26	DE003		19.49		2.076		17.42		2.617		16.87		4.376		15.12		0.001		0.004		0.151
16	CP288	86	Prod	1190	80	2078	24	Sanitätshaus Fürst GmbH	DE003	World	11943	Measurements	0	7008	MEASUREMENTS	Measurements	21		53763	Skin discolouration	0		197300	9	2020-07-14 08:38:17	2020-07-14 08:38:17	2020-07-17 12:54:26	DE003		10.55		3.479		7.073		4.726		5.827		6.591		3.962		0		0.001		0.013
16	CP288	86	Prod	1190	80	2078	24	Sanitätshaus Fürst GmbH	DE003	World	11943	Measurements	0	7008	MEASUREMENTS	Measurements	21		53763	Skin discolouration	0		197301	10	2020-07-14 08:38:17	2020-07-14 08:38:17	2020-07-17 12:54:26	DE003		34.16		4.994		29.17		8.983		25.18		11.97		22.19		0		0.004		0.148
16	CP288	86	Prod	1190	80	2078	24	Sanitätshaus Fürst GmbH	DE003	World	11943	Measurements	0	7008	MEASUREMENTS	Measurements	21		53763	Skin discolouration	0		197302	11	2020-07-14 08:38:17	2020-07-14 08:38:17	2020-07-17 12:54:26	DE003		13.22		4.625		8.596		6.394		6.827		7.568		5.653		0		0		0
16	CP288	86	Prod	1190	80	2078	24	Sanitätshaus Fürst GmbH	DE003	World	11943	Measurements	0	7008	MEASUREMENTS	Measurements	21		53763	Skin discolouration	0		197303	12	2020-07-14 08:38:17	2020-07-14 08:38:17	2020-07-17 12:54:26	DE003		14.47		5.365		9.107		8.235		6.238		10.21		4.26		0		0.005		0.038
16	CP288	86	Prod	1190	80	2078	24	Sanitätshaus Fürst GmbH	DE003	World	11943	Measurements	0	7008	MEASUREMENTS	Measurements	21		53763	Skin discolouration	0		197304	13	2020-07-14 08:38:17	2020-07-14 08:38:17	2020-07-17 12:54:26	DE003		5.04		3.719		1.328		4.77		0.277		5.039		0.008		0		0.001		0.004
16	CP288	86	Prod	1190	80	2078	24	Sanitätshaus Fürst GmbH	DE003	World	11943	Measurements	0	7008	MEASUREMENTS	Measurements	21		53763	Skin discolouration	0		197305	14	2020-07-14 08:38:17	2020-07-14 08:38:17	2020-07-17 12:54:26	DE003		6.31		3.43		2.883		5.518		0.794		6.074		0.238		0.02		0.065		0.154
16	CP288	86	Prod	1190	80	2078	24	Sanitätshaus Fürst GmbH	DE003	World	11943	Measurements	0	7008	MEASUREMENTS	Measurements	21		53763	Skin discolouration	0		197306	15	2020-07-14 08:38:17	2020-07-14 08:38:17	2020-07-17 12:54:26	DE003		10.13		3.493		6.643		5.75		4.386		6.859		3.277		0		0		0.028
16	CP288	86	Prod	1190	80	2078	24	Sanitätshaus Fürst GmbH	DE003	World	11943	Measurements	0	7008	MEASUREMENTS	Measurements	21		53763	Skin discolouration	0		197307	16	2020-07-14 08:38:17	2020-07-14 08:38:17	2020-07-17 12:54:26	DE003		7.73		3.254		4.477		5.11		2.621		6.216		1.516		0.051		0.109		0.71
16	CP288	86	Prod	1190	80	2078	24	Sanitätshaus Fürst GmbH	DE003	World	11943	Measurements	0	7008	MEASUREMENTS	Measurements	21		53763	Skin discolouration	0		197308	17	2020-07-14 08:38:17	2020-07-14 08:38:17	2020-07-17 12:54:26	DE003		33.25		3.397		29.85		5.161		28.09		6.841		26.41		0		0		0.031
16	CP288	86	Prod	1190	80	2078	24	Sanitätshaus Fürst GmbH	DE003	World	11943	Measurements	0	7008	MEASUREMENTS	Measurements	21		53763	Skin discolouration	0		197309	18	2020-07-14 08:38:17	2020-07-14 08:38:17	2020-07-17 12:54:26	DE003		22.78		4.139		18.64		6.237		16.54		8.253		14.52		0		0.003		0.219
16	CP288	86	Prod	1190	80	2078	24	Sanitätshaus Fürst GmbH	DE003	World	11943	Measurements	0	7008	MEASUREMENTS	Measurements	21		53763	Skin discolouration	0		197310	19	2020-07-14 08:38:17	2020-07-14 08:38:17	2020-07-17 12:54:26	DE003		7.37		3.415		3.958		4.982		2.391		6.034		1.339		0		0		0.001
16	CP288	86	Prod	1190	80	2078	24	Sanitätshaus Fürst GmbH	DE003	World	11943	Measurements	0	7008	MEASUREMENTS	Measurements	21		53763	Skin discolouration	0		197311	20	2020-07-14 08:38:17	2020-07-14 08:38:17	2020-07-17 12:54:26	DE003		12.33		3.182		9.156		6.33		6.008		9.501		2.837		0		0		0.002
16	CP288	86	Prod	1190	80	2078	24	Sanitätshaus Fürst GmbH	DE003	World	11943	Measurements	0	7008	MEASUREMENTS	Measurements	21		53763	Skin discolouration	0		197312	21	2020-07-14 08:38:17	2020-07-14 08:38:17	2020-07-17 12:54:26	DE003		16.51		3.057		13.46		6.128		10.39		10.45		6.063		0		0		0
16	CP288	86	Prod	1190	80	2078	24	Sanitätshaus Fürst GmbH	DE003	World	11943	Measurements	0	7008	MEASUREMENTS	Measurements	21		53763	Skin discolouration	0		197313	22	2020-07-14 08:38:17	2020-07-14 08:38:17	2020-07-17 12:54:26	DE003		14.11		3.197		10.92		5.031		9.086		7.788		6.329		0		0		0
16	CP288	86	Prod	1190	80	2078	24	Sanitätshaus Fürst GmbH	DE003	World	11943	Measurements	0	7008	MEASUREMENTS	Measurements	21		53763	Skin discolouration	0		197314	23	2020-07-14 08:38:17	2020-07-14 08:38:17	2020-07-17 12:54:26	DE003		2.4		1.538		0.868		1.808		0.597		2.124		0.282		0		0		0
16	CP288	86	Prod	1190	80	2078	24	Sanitätshaus Fürst GmbH	DE003	World	11943	Measurements	0	7008	MEASUREMENTS	Measurements	21		53763	Skin discolouration	0		197315	24	2020-07-14 08:38:17	2020-07-14 08:38:17	2020-07-17 12:54:26	DE003		25.61		2.202		23.41		3.847		21.77		6.402		19.21		0		0.016		1.05
16	CP288	86	Prod	1190	80	2078	24	Sanitätshaus Fürst GmbH	DE003	World	11943	Measurements	0	7008	MEASUREMENTS	Measurements	21		53763	Skin discolouration	0		197316	25	2020-07-14 08:38:17	2020-07-14 08:38:17	2020-07-17 12:54:26	DE003		2.64		2.091		0.554		2.477		0.167		2.555		0.09		0		0.001		0.044
16	CP288	86	Prod	1190	80	2078	24	Sanitätshaus Fürst GmbH	DE003	World	11943	Measurements	0	7008	MEASUREMENTS	Measurements	21		53763	Skin discolouration	0		197317	26	2020-07-14 08:38:17	2020-07-14 08:38:17	2020-07-17 12:54:26	DE003		5.77		2.938		2.839		3.923		1.854		4.42		1.357		0		0		0.001
16	CP288	86	Prod	1190	80	2078	24	Sanitätshaus Fürst GmbH	DE003	World	11943	Measurements	0	7008	MEASUREMENTS	Measurements	21		53763	Skin discolouration	0		197318	27	2020-07-14 08:38:17	2020-07-14 08:38:17	2020-07-17 12:54:26	DE003		2.53		2.172		0.36		2.516		0.016		2.53		0.002		0.001		0.006		0.056
16	CP288	86	Prod	1190	80	2078	24	Sanitätshaus Fürst GmbH	DE003	World	11943	Measurements	0	7008	MEASUREMENTS	Measurements	21		53763	Skin discolouration	0		197319	28	2020-07-14 08:38:17	2020-07-14 08:38:17	2020-07-17 12:54:26	DE003		6.29		1.758		4.534		3.425		2.868		4.781		1.512		0		0		0.001
16	CP288	86	Prod	1190	80	2078	24	Sanitätshaus Fürst GmbH	DE003	World	11943	Measurements	0	7008	MEASUREMENTS	Measurements	21		53763	Skin discolouration	0		197320	29	2020-07-14 08:38:17	2020-07-14 08:38:17	2020-07-17 12:54:26	DE003		17.23		2.096		15.13		2.507		14.72		3.226		14		0.002		0.001		0.004
16	CP288	86	Prod	1190	80	2078	24	Sanitätshaus Fürst GmbH	DE003	World	11943	Measurements	0	7008	MEASUREMENTS	Measurements	21		53763	Skin discolouration	0		197321	30	2020-07-14 08:38:17	2020-07-14 08:38:17	2020-07-17 12:54:26	DE003		10.51		4.55		5.967		7.502		3.015		8.457		2.061		0		0.003		0.616
16	CP288	86	Prod	1190	80	2078	24	Sanitätshaus Fürst GmbH	DE003	World	11943	Measurements	0	7008	MEASUREMENTS	Measurements	21		53763	Skin discolouration	0		197322	31	2020-07-14 08:38:17	2020-07-14 08:38:17	2020-07-17 12:54:26	DE003		2.1		1.055		1.05		1.657		0.448		1.856		0.249		0		0		0.003
16	CP288	86	Prod	1190	80	2078	24	Sanitätshaus Fürst GmbH	DE003	World	11943	Measurements	0	7008	MEASUREMENTS	Measurements	21		53763	Skin discolouration	0		197323	32	2020-07-14 08:38:17	2020-07-14 08:38:17	2020-07-17 12:54:26	DE003		21.44		6.063		15.37		10.91		10.52		14.76		6.675		0		0		0
16	CP288	86	Prod	1190	80	2078	24	Sanitätshaus Fürst GmbH	DE003	World	11943	Measurements	0	7008	MEASUREMENTS	Measurements	21		53763	Skin discolouration	0		197324	33	2020-07-14 08:38:17	2020-07-14 08:38:17	2020-07-17 12:54:26	DE003		13.84		2.18		11.66		3.277		10.56		5.65		8.19		0		0.013		0.41
16	CP288	86	Prod	1190	80	2078	24	Sanitätshaus Fürst GmbH	DE003	World	11943	Measurements	0	7008	MEASUREMENTS	Measurements	21		53763	Skin discolouration	0		197325	34	2020-07-14 08:38:17	2020-07-14 08:38:17	2020-07-17 12:54:26	DE003		9.31		2.192		7.123		3.288		6.027		6.073		3.242		0		0		0
16	CP288	86	Prod	1190	80	2078	24	Sanitätshaus Fürst GmbH	DE003	World	11943	Measurements	0	7008	MEASUREMENTS	Measurements	21		53763	Skin discolouration	0		197326	35	2020-07-14 08:38:17	2020-07-14 08:38:17	2020-07-17 12:54:26	DE003		19.04		2.133		16.91		3.864		15.18		6.256		12.79		0		0.009		0.409
16	CP288	86	Prod	1190	80	2078	24	Sanitätshaus Fürst GmbH	DE003	World	11943	Measurements	0	7008	MEASUREMENTS	Measurements	21		53763	Skin discolouration	0		197327	36	2020-07-14 08:38:17	2020-07-14 08:38:17	2020-07-17 12:54:26	DE003		5.76		2.484		3.279		3.479		2.285		4.378		1.386		0		0.006		0.051
16	CP288	86	Prod	1190	80	2078	24	Sanitätshaus Fürst GmbH	DE003	World	11943	Measurements	0	7008	MEASUREMENTS	Measurements	21		53763	Skin discolouration	0		197328	37	2020-07-14 08:38:17	2020-07-14 08:38:17	2020-07-17 12:54:26	DE003		12.87		2.522		10.35		4.361		8.511		7.527		5.345		0		0		0
16	CP288	86	Prod	1191	80	2079	24	Sanitätshaus Fürst GmbH	DE003	World	11974	Measurements	0	7008	MEASUREMENTS	Measurements	21		53823	Skin discolouration	0		139421	1	2020-07-14 08:38:17	2020-07-14 08:38:17	2020-07-17 12:54:26	DE003		11.38		4.085		7.304		6.258		5.132		8.375		3.014		0.004		0.001		0.021
16	CP288	86	Prod	1191	80	2079	24	Sanitätshaus Fürst GmbH	DE003	World	11974	Measurements	0	7008	MEASUREMENTS	Measurements	21		53823	Skin discolouration	0		197329	2	2020-07-14 08:38:17	2020-07-14 08:38:17	2020-07-17 12:54:26	DE003		6.21		5.015		1.202		6.101		0.116		6.217		0		1.426		0.92		0.832
16	CP288	86	Prod	1191	80	2079	24	Sanitätshaus Fürst GmbH	DE003	World	11974	Measurements	0	7008	MEASUREMENTS	Measurements	21		53823	Skin discolouration	0		197330	3	2020-07-14 08:38:17	2020-07-14 08:38:17	2020-07-17 12:54:26	DE003		25.74		11.78		13.95		20.24		5.502		25.07		0.669		0.19		0.655		1.326
16	CP288	86	Prod	1191	80	2079	24	Sanitätshaus Fürst GmbH	DE003	World	11974	Measurements	0	7008	MEASUREMENTS	Measurements	21		53823	Skin discolouration	0		197331	4	2020-07-14 08:38:17	2020-07-14 08:38:17	2020-07-17 12:54:26	DE003		20.46		5.354		15.11		8.771		11.69		11.65		8.813		0.003		0.003		0.005
16	CP288	86	Prod	1191	80	2079	24	Sanitätshaus Fürst GmbH	DE003	World	11974	Measurements	0	7008	MEASUREMENTS	Measurements	21		53823	Skin discolouration	0		197332	5	2020-07-14 08:38:17	2020-07-14 08:38:17	2020-07-17 12:54:26	DE003		20.8		7.797		13		11.71		9.094		14.86		5.939		5.444		6.604		3.467
16	CP288	86	Prod	1191	80	2079	24	Sanitätshaus Fürst GmbH	DE003	World	11974	Measurements	0	7008	MEASUREMENTS	Measurements	21		53823	Skin discolouration	0		197333	6	2020-07-14 08:38:17	2020-07-14 08:38:17	2020-07-17 12:54:26	DE003		17.41		4.721		12.69		6.661		10.75		8.037		9.377		0.004		0.028		0.075
16	CP288	86	Prod	1191	80	2079	24	Sanitätshaus Fürst GmbH	DE003	World	11974	Measurements	0	7008	MEASUREMENTS	Measurements	21		53823	Skin discolouration	0		197334	7	2020-07-14 08:38:17	2020-07-14 08:38:17	2020-07-17 12:54:26	DE003		8.73		4.881		3.854		6.007		2.728		6.116		2.619		0.018		0.047		0.434
16	CP288	86	Prod	1191	80	2079	24	Sanitätshaus Fürst GmbH	DE003	World	11974	Measurements	0	7008	MEASUREMENTS	Measurements	21		53823	Skin discolouration	0		197335	8	2020-07-14 08:38:17	2020-07-14 08:38:17	2020-07-17 12:54:26	DE003		14.2		9.679		4.526		13.17		1.027		14.18		0.021		1.437		3.324		1.446
16	CP288	86	Prod	1191	80	2079	24	Sanitätshaus Fürst GmbH	DE003	World	11974	Measurements	0	7008	MEASUREMENTS	Measurements	21		53823	Skin discolouration	0		197336	9	2020-07-14 08:38:17	2020-07-14 08:38:17	2020-07-17 12:54:26	DE003		74.9		10.84		64.06		21.81		53.09		33.88		41.02		0.098		0.406		0.343
16	CP288	86	Prod	1191	80	2079	24	Sanitätshaus Fürst GmbH	DE003	World	11974	Measurements	0	7008	MEASUREMENTS	Measurements	21		53823	Skin discolouration	0		197337	10	2020-07-14 08:38:17	2020-07-14 08:38:17	2020-07-17 12:54:26	DE003		3.54		2.2		1.347		3.147		0.4		3.491		0.057		0.129		0.157		0.349
16	CP288	86	Prod	1191	80	2079	24	Sanitätshaus Fürst GmbH	DE003	World	11974	Measurements	0	7008	MEASUREMENTS	Measurements	21		53823	Skin discolouration	0		197338	11	2020-07-14 08:38:17	2020-07-14 08:38:17	2020-07-17 12:54:26	DE003		33.14		7.071		26.07		12.47		20.67		17.44		15.69		3.041		4.942		13.58
16	CP288	86	Prod	1191	80	2079	24	Sanitätshaus Fürst GmbH	DE003	World	11974	Measurements	0	7008	MEASUREMENTS	Measurements	21		53823	Skin discolouration	0		197339	12	2020-07-14 08:38:17	2020-07-14 08:38:17	2020-07-17 12:54:26	DE003		19.35		6.694		12.66		10.94		8.412		13.3		6.056		4.275		3.543		2.99
16	CP288	86	Prod	1191	80	2079	24	Sanitätshaus Fürst GmbH	DE003	World	11974	Measurements	0	7008	MEASUREMENTS	Measurements	21		53823	Skin discolouration	0		197340	13	2020-07-14 08:38:17	2020-07-14 08:38:17	2020-07-17 12:54:26	DE003		9.12		6.439		2.682		7.762		1.359		7.864		1.256		0.247		0.768		2.191
16	CP288	86	Prod	1191	80	2079	24	Sanitätshaus Fürst GmbH	DE003	World	11974	Measurements	0	7008	MEASUREMENTS	Measurements	21		53823	Skin discolouration	0		197341	14	2020-07-14 08:38:17	2020-07-14 08:38:17	2020-07-17 12:54:26	DE003		34.77		8.916		25.86		15.4		19.37		22.78		11.98		4.769		4.965		5.168
16	CP288	86	Prod	1191	80	2079	24	Sanitätshaus Fürst GmbH	DE003	World	11974	Measurements	0	7008	MEASUREMENTS	Measurements	21		53823	Skin discolouration	0		197342	15	2020-07-14 08:38:17	2020-07-14 08:38:17	2020-07-17 12:54:26	DE003		3.16		3.088		0.079		3.167		0		3.167		0		0.199		0.229		0.177
16	CP288	86	Prod	1191	80	2079	24	Sanitätshaus Fürst GmbH	DE003	World	11974	Measurements	0	7008	MEASUREMENTS	Measurements	21		53823	Skin discolouration	0		197343	16	2020-07-14 08:38:17	2020-07-14 08:38:17	2020-07-17 12:54:26	DE003		40.84		10.09		30.75		16.34		24.5		21.69		19.15		0		0.002		0.102
16	CP288	86	Prod	1191	80	2079	24	Sanitätshaus Fürst GmbH	DE003	World	11974	Measurements	0	7008	MEASUREMENTS	Measurements	21		53823	Skin discolouration	0		197344	17	2020-07-14 08:38:17	2020-07-14 08:38:17	2020-07-17 12:54:26	DE003		12.97		8.116		4.86		11.83		1.138		12.49		0.481		0.199		0.796		3.214
16	CP288	86	Prod	1191	80	2079	24	Sanitätshaus Fürst GmbH	DE003	World	11974	Measurements	0	7008	MEASUREMENTS	Measurements	21		53823	Skin discolouration	0		197345	18	2020-07-14 08:38:17	2020-07-14 08:38:17	2020-07-17 12:54:26	DE003		21.18		5.333		15.85		7.56		13.62		9.346		11.84		0.003		0.006		0.008
16	CP288	86	Prod	1191	80	2079	24	Sanitätshaus Fürst GmbH	DE003	World	11974	Measurements	0	7008	MEASUREMENTS	Measurements	21		53823	Skin discolouration	0		197346	19	2020-07-14 08:38:17	2020-07-14 08:38:17	2020-07-17 12:54:26	DE003		21.22		7.644		13.58		12.75		8.471		14.84		6.384		3.392		4.978		5.344
16	CP288	86	Prod	1191	80	2079	24	Sanitätshaus Fürst GmbH	DE003	World	11974	Measurements	0	7008	MEASUREMENTS	Measurements	21		53823	Skin discolouration	0		197347	20	2020-07-14 08:38:17	2020-07-14 08:38:17	2020-07-17 12:54:26	DE003		31		8.903		22.1		14.44		16.55		19.83		11.16		0		0		0.008
16	CP288	86	Prod	1191	80	2079	24	Sanitätshaus Fürst GmbH	DE003	World	11974	Measurements	0	7008	MEASUREMENTS	Measurements	21		53823	Skin discolouration	0		197348	21	2020-07-14 08:38:17	2020-07-14 08:38:17	2020-07-17 12:54:26	DE003		9.26		0.445		8.819		0.192		9.072		0.118		9.146		0		0		0
16	CP288	86	Prod	1192	80	2080	24	Sanitätshaus Fürst GmbH	DE003	World	12005	Measurements	0	7008	MEASUREMENTS	Measurements	21		53883	Skin discolouration	0		139501	1	2020-07-14 08:38:20	2020-07-14 08:38:20	2020-07-17 12:54:26	DE003		6.77		5.159		1.615		6.739		0.035		6.745		0.029		0		0		0.168
16	CP288	86	Prod	1192	80	2080	24	Sanitätshaus Fürst GmbH	DE003	World	12005	Measurements	0	7008	MEASUREMENTS	Measurements	21		53883	Skin discolouration	0		197380	2	2020-07-14 08:38:20	2020-07-14 08:38:20	2020-07-17 12:54:26	DE003		5.16		3.559		1.601		4.037		1.124		4.389		0.772		0		0		0
16	CP288	86	Prod	1192	80	2080	24	Sanitätshaus Fürst GmbH	DE003	World	12005	Measurements	0	7008	MEASUREMENTS	Measurements	21		53883	Skin discolouration	0		197381	3	2020-07-14 08:38:20	2020-07-14 08:38:20	2020-07-17 12:54:26	DE003		10.16		4.884		5.285		8.317		1.852		10.05		0.113		0		0		1.037
16	CP288	86	Prod	1192	80	2080	24	Sanitätshaus Fürst GmbH	DE003	World	12005	Measurements	0	7008	MEASUREMENTS	Measurements	21		53883	Skin discolouration	0		197382	4	2020-07-14 08:38:20	2020-07-14 08:38:20	2020-07-17 12:54:26	DE003		12.01		5.332		6.684		9.905		2.111		11.96		0.049		0		0		0.057
16	CP288	86	Prod	1192	80	2080	24	Sanitätshaus Fürst GmbH	DE003	World	12005	Measurements	0	7008	MEASUREMENTS	Measurements	21		53883	Skin discolouration	0		197383	5	2020-07-14 08:38:20	2020-07-14 08:38:20	2020-07-17 12:54:26	DE003		13.13		4.389		8.75		7.628		5.512		9.893		3.246		0.002		0.858		2.495
16	CP288	86	Prod	1192	80	2080	24	Sanitätshaus Fürst GmbH	DE003	World	12005	Measurements	0	7008	MEASUREMENTS	Measurements	21		53883	Skin discolouration	0		197384	6	2020-07-14 08:38:20	2020-07-14 08:38:20	2020-07-17 12:54:26	DE003		4.97		3.137		1.84		3.57		1.407		3.58		1.397		0		0		0
16	CP288	86	Prod	1192	80	2080	24	Sanitätshaus Fürst GmbH	DE003	World	12005	Measurements	0	7008	MEASUREMENTS	Measurements	21		53883	Skin discolouration	0		197385	7	2020-07-14 08:38:20	2020-07-14 08:38:20	2020-07-17 12:54:26	DE003		8.11		4.954		3.164		7.872		0.246		8.118		0		0		0		0.039
16	CP288	86	Prod	1192	80	2080	24	Sanitätshaus Fürst GmbH	DE003	World	12005	Measurements	0	7008	MEASUREMENTS	Measurements	21		53883	Skin discolouration	0		197386	8	2020-07-14 08:38:20	2020-07-14 08:38:20	2020-07-17 12:54:26	DE003		7.81		5.686		2.131		7.674		0.143		7.817		0		0.005		0.035		0.05
16	CP288	86	Prod	1192	80	2080	24	Sanitätshaus Fürst GmbH	DE003	World	12005	Measurements	0	7008	MEASUREMENTS	Measurements	21		53883	Skin discolouration	0		197387	9	2020-07-14 08:38:20	2020-07-14 08:38:20	2020-07-17 12:54:26	DE003		15.14		3.432		11.71		6.292		8.857		9.279		5.87		0		0		0.23
16	CP288	86	Prod	1192	80	2080	24	Sanitätshaus Fürst GmbH	DE003	World	12005	Measurements	0	7008	MEASUREMENTS	Measurements	21		53883	Skin discolouration	0		197388	10	2020-07-14 08:38:20	2020-07-14 08:38:20	2020-07-17 12:54:26	DE003		7.66		3.877		3.783		6.36		1.3		6.447		1.213		0.363		1.057		2.21
16	CP288	86	Prod	1192	80	2080	24	Sanitätshaus Fürst GmbH	DE003	World	12005	Measurements	0	7008	MEASUREMENTS	Measurements	21		53883	Skin discolouration	0		197389	11	2020-07-14 08:38:20	2020-07-14 08:38:20	2020-07-17 12:54:26	DE003		7.9		3.452		4.45		4.751		3.151		4.772		3.131		0		0		0.602
16	CP288	86	Prod	1192	80	2080	24	Sanitätshaus Fürst GmbH	DE003	World	12005	Measurements	0	7008	MEASUREMENTS	Measurements	21		53883	Skin discolouration	0		197390	12	2020-07-14 08:38:20	2020-07-14 08:38:20	2020-07-17 12:54:26	DE003		9.97		4.826		5.147		6.62		3.353		7.076		2.897		0.062		0.214		0.49
16	CP288	86	Prod	1192	80	2080	24	Sanitätshaus Fürst GmbH	DE003	World	12005	Measurements	0	7008	MEASUREMENTS	Measurements	21		53883	Skin discolouration	0		197391	13	2020-07-14 08:38:20	2020-07-14 08:38:20	2020-07-17 12:54:26	DE003		7.75		3.77		3.98		5.076		2.674		5.496		2.254		0		0.001		0.487
16	CP288	86	Prod	1192	80	2080	24	Sanitätshaus Fürst GmbH	DE003	World	12005	Measurements	0	7008	MEASUREMENTS	Measurements	21		53883	Skin discolouration	0		197392	14	2020-07-14 08:38:20	2020-07-14 08:38:20	2020-07-17 12:54:26	DE003		15.15		5.88		9.277		12.1		3.057		15.13		0.022		0.025		0.259		2.846
16	CP288	86	Prod	1192	80	2080	24	Sanitätshaus Fürst GmbH	DE003	World	12005	Measurements	0	7008	MEASUREMENTS	Measurements	21		53883	Skin discolouration	0		197393	15	2020-07-14 08:38:20	2020-07-14 08:38:20	2020-07-17 12:54:26	DE003		10.26		5.556		4.708		9.606		0.658		10.26		0		0.001		0.011		1.202
16	CP288	86	Prod	1192	80	2080	24	Sanitätshaus Fürst GmbH	DE003	World	12005	Measurements	0	7008	MEASUREMENTS	Measurements	21		53883	Skin discolouration	0		197394	16	2020-07-14 08:38:20	2020-07-14 08:38:20	2020-07-17 12:54:26	DE003		7		3.517		3.49		4.842		2.164		5.21		1.796		0		0.005		0.017
16	CP288	86	Prod	1192	80	2080	24	Sanitätshaus Fürst GmbH	DE003	World	12005	Measurements	0	7008	MEASUREMENTS	Measurements	21		53883	Skin discolouration	0		197395	17	2020-07-14 08:38:20	2020-07-14 08:38:20	2020-07-17 12:54:26	DE003		11.89		7.817		4.076		11.56		0.332		11.78		0.108		0.002		0.23		1.33
16	CP288	86	Prod	1192	80	2080	24	Sanitätshaus Fürst GmbH	DE003	World	12005	Measurements	0	7008	MEASUREMENTS	Measurements	21		53883	Skin discolouration	0		197396	18	2020-07-14 08:38:20	2020-07-14 08:38:20	2020-07-17 12:54:26	DE003		4.65		3.517		1.141		4.656		0.003		4.656		0.003		0.05		0.292		1.394
16	CP288	86	Prod	1192	80	2080	24	Sanitätshaus Fürst GmbH	DE003	World	12005	Measurements	0	7008	MEASUREMENTS	Measurements	21		53883	Skin discolouration	0		197397	19	2020-07-14 08:38:20	2020-07-14 08:38:20	2020-07-17 12:54:26	DE003		16.3		5.581		10.72		9.533		6.774		10.48		5.823		0.028		0.753		2.558
16	CP288	86	Prod	1192	80	2080	24	Sanitätshaus Fürst GmbH	DE003	World	12005	Measurements	0	7008	MEASUREMENTS	Measurements	21		53883	Skin discolouration	0		197398	20	2020-07-14 08:38:20	2020-07-14 08:38:20	2020-07-17 12:54:26	DE003		6.42		3.622		2.807		4.494		1.935		4.566		1.863		0		0.107		1.736
16	CP288	86	Prod	1192	80	2080	24	Sanitätshaus Fürst GmbH	DE003	World	12005	Measurements	0	7008	MEASUREMENTS	Measurements	21		53883	Skin discolouration	0		197399	21	2020-07-14 08:38:20	2020-07-14 08:38:20	2020-07-17 12:54:26	DE003		8.2		5.69		2.516		8.183		0.023		8.196		0.01		0		0.015		0.881
16	CP288	86	Prod	1192	80	2080	24	Sanitätshaus Fürst GmbH	DE003	World	12005	Measurements	0	7008	MEASUREMENTS	Measurements	21		53883	Skin discolouration	0		197400	22	2020-07-14 08:38:20	2020-07-14 08:38:20	2020-07-17 12:54:26	DE003		11.34		5.838		5.502		9.784		1.556		10.56		0.772		0.112		0.313		1.391
16	CP288	86	Prod	1192	80	2080	24	Sanitätshaus Fürst GmbH	DE003	World	12005	Measurements	0	7008	MEASUREMENTS	Measurements	21		53883	Skin discolouration	0		197401	23	2020-07-14 08:38:20	2020-07-14 08:38:20	2020-07-17 12:54:26	DE003		5.45		3.794		1.656		4.879		0.572		4.98		0.47		0		0.001		0
16	CP288	86	Prod	1192	80	2080	24	Sanitätshaus Fürst GmbH	DE003	World	12005	Measurements	0	7008	MEASUREMENTS	Measurements	21		53883	Skin discolouration	0		197402	24	2020-07-14 08:38:20	2020-07-14 08:38:20	2020-07-17 12:54:26	DE003		7.28		4.87		2.416		5.802		1.484		5.819		1.467		0.001		0.064		0.888
16	CP288	86	Prod	1192	80	2080	24	Sanitätshaus Fürst GmbH	DE003	World	12005	Measurements	0	7008	MEASUREMENTS	Measurements	21		53883	Skin discolouration	0		197403	25	2020-07-14 08:38:20	2020-07-14 08:38:20	2020-07-17 12:54:26	DE003		16.76		4.053		12.71		6.374		10.39		7.251		9.519		0		0.163		0.808
16	CP288	86	Prod	1192	80	2080	24	Sanitätshaus Fürst GmbH	DE003	World	12005	Measurements	0	7008	MEASUREMENTS	Measurements	21		53883	Skin discolouration	0		197404	26	2020-07-14 08:38:20	2020-07-14 08:38:20	2020-07-17 12:54:26	DE003		7.75		4.061		3.694		7.132		0.624		7.756		0		0.012		0.121		0.925
16	CP288	86	Prod	1192	80	2080	24	Sanitätshaus Fürst GmbH	DE003	World	12005	Measurements	0	7008	MEASUREMENTS	Measurements	21		53883	Skin discolouration	0		197405	27	2020-07-14 08:38:20	2020-07-14 08:38:20	2020-07-17 12:54:26	DE003		13.74		8.52		5.221		11.44		2.295		11.59		2.142		0.012		0.039		0.912
16	CP288	86	Prod	1192	80	2080	24	Sanitätshaus Fürst GmbH	DE003	World	12005	Measurements	0	7008	MEASUREMENTS	Measurements	21		53883	Skin discolouration	0		197406	28	2020-07-14 08:38:20	2020-07-14 08:38:20	2020-07-17 12:54:26	DE003		8.72		5.246		3.479		7.226		1.5		7.81		0.915		0		0.001		0.1
16	CP288	86	Prod	1192	80	2080	24	Sanitätshaus Fürst GmbH	DE003	World	12005	Measurements	0	7008	MEASUREMENTS	Measurements	21		53883	Skin discolouration	0		197407	29	2020-07-14 08:38:20	2020-07-14 08:38:20	2020-07-17 12:54:26	DE003		10.17		4.284		5.889		5.999		4.174		6.346		3.827		0		0.002		0.602
16	CP288	86	Prod	1192	80	2080	24	Sanitätshaus Fürst GmbH	DE003	World	12005	Measurements	0	7008	MEASUREMENTS	Measurements	21		53883	Skin discolouration	0		197408	30	2020-07-14 08:38:20	2020-07-14 08:38:20	2020-07-17 12:54:26	DE003		5.7		4.179		1.526		5.183		0.522		5.183		0.522		0.001		0		0
16	CP288	86	Prod	1192	80	2080	24	Sanitätshaus Fürst GmbH	DE003	World	12005	Measurements	0	7008	MEASUREMENTS	Measurements	21		53883	Skin discolouration	0		197409	31	2020-07-14 08:38:20	2020-07-14 08:38:20	2020-07-17 12:54:26	DE003		7.5		3.859		3.643		6.992		0.511		7.205		0.297		0.353		0.514		1.012
16	CP288	86	Prod	1192	80	2080	24	Sanitätshaus Fürst GmbH	DE003	World	12005	Measurements	0	7008	MEASUREMENTS	Measurements	21		53883	Skin discolouration	0		197410	32	2020-07-14 08:38:20	2020-07-14 08:38:20	2020-07-17 12:54:26	DE003		10.85		2.869		7.988		4.125		6.732		5.534		5.323		0		0		0.011
16	CP288	86	Prod	1279	80	2081	24	Sanitätshaus Fürst GmbH	DE003	World	14109	Measurements	0	7008	MEASUREMENTS	Measurements	21		58458	Skin discolouration	0		146244	1	2020-07-14 08:38:21	2020-07-14 08:38:21	2020-07-17 12:54:26	DE003		10.78		2.577		8.208		3.756		7.029		3.763		7.023		0		0		0
16	CP288	86	Prod	1279	80	2081	24	Sanitätshaus Fürst GmbH	DE003	World	14109	Measurements	0	7008	MEASUREMENTS	Measurements	21		58458	Skin discolouration	0		197411	2	2020-07-14 08:38:21	2020-07-14 08:38:21	2020-07-17 12:54:26	DE003		53.72		4.296		49.42		8.028		45.69		11.63		42.08		0		0		0
16	CP288	86	Prod	1279	80	2081	24	Sanitätshaus Fürst GmbH	DE003	World	14109	Measurements	0	7008	MEASUREMENTS	Measurements	21		58458	Skin discolouration	0		197412	3	2020-07-14 08:38:21	2020-07-14 08:38:21	2020-07-17 12:54:26	DE003		24.28		2.073		22.21		3.011		21.27		3.245		21.04		0		0		0
16	CP288	86	Prod	1279	80	2081	24	Sanitätshaus Fürst GmbH	DE003	World	14109	Measurements	0	7008	MEASUREMENTS	Measurements	21		58458	Skin discolouration	0		197413	4	2020-07-14 08:38:21	2020-07-14 08:38:21	2020-07-17 12:54:26	DE003		30.35		2.443		27.91		4.869		25.49		7.303		23.05		0		0		0.105
16	CP288	86	Prod	1279	80	2081	24	Sanitätshaus Fürst GmbH	DE003	World	14109	Measurements	0	7008	MEASUREMENTS	Measurements	21		58458	Skin discolouration	0		197414	5	2020-07-14 08:38:21	2020-07-14 08:38:21	2020-07-17 12:54:26	DE003		35.74		1.007		34.73		1.544		34.19		2.744		32.99		0		0		1.895
16	CP288	86	Prod	1279	80	2081	24	Sanitätshaus Fürst GmbH	DE003	World	14109	Measurements	0	7008	MEASUREMENTS	Measurements	21		58458	Skin discolouration	0		197415	6	2020-07-14 08:38:21	2020-07-14 08:38:21	2020-07-17 12:54:26	DE003		21.14		1.336		19.8		1.452		19.69		1.537		19.6		0		0.004		0.027
16	CP288	86	Prod	1279	80	2081	24	Sanitätshaus Fürst GmbH	DE003	World	14109	Measurements	0	7008	MEASUREMENTS	Measurements	21		58458	Skin discolouration	0		197416	7	2020-07-14 08:38:21	2020-07-14 08:38:21	2020-07-17 12:54:26	DE003		34.15		2.445		31.71		4.98		29.17		7.011		27.14		0		0.011		1.05
16	CP288	86	Prod	1279	80	2081	24	Sanitätshaus Fürst GmbH	DE003	World	14109	Measurements	0	7008	MEASUREMENTS	Measurements	21		58458	Skin discolouration	0		197417	8	2020-07-14 08:38:21	2020-07-14 08:38:21	2020-07-17 12:54:26	DE003		36.1		2.29		33.81		3.58		32.52		4.683		31.42		0		0.01		0.028
16	CP288	86	Prod	1279	80	2081	24	Sanitätshaus Fürst GmbH	DE003	World	14109	Measurements	0	7008	MEASUREMENTS	Measurements	21		58458	Skin discolouration	0		197418	9	2020-07-14 08:38:21	2020-07-14 08:38:21	2020-07-17 12:54:26	DE003		34.42		3.457		30.96		5.438		28.98		6.739		27.68		0.032		0.012		0.175
16	CP288	86	Prod	1279	80	2081	24	Sanitätshaus Fürst GmbH	DE003	World	14109	Measurements	0	7008	MEASUREMENTS	Measurements	21		58458	Skin discolouration	0		197419	10	2020-07-14 08:38:21	2020-07-14 08:38:21	2020-07-17 12:54:26	DE003		24.61		1.626		22.98		2.554		22.05		3.927		20.68		0		0		0
16	CP288	86	Prod	1279	80	2081	24	Sanitätshaus Fürst GmbH	DE003	World	14109	Measurements	0	7008	MEASUREMENTS	Measurements	21		58458	Skin discolouration	0		197420	11	2020-07-14 08:38:21	2020-07-14 08:38:21	2020-07-17 12:54:26	DE003		3.73		2.196		1.542		3.231		0.507		3.664		0.073		0		0		0.003
16	CP288	86	Prod	1279	80	2081	24	Sanitätshaus Fürst GmbH	DE003	World	14109	Measurements	0	7008	MEASUREMENTS	Measurements	21		58458	Skin discolouration	0		197421	12	2020-07-14 08:38:21	2020-07-14 08:38:21	2020-07-17 12:54:26	DE003		28.64		3.084		25.55		5.498		23.14		7.373		21.27		0		0		0.629
16	CP288	86	Prod	1279	80	2081	24	Sanitätshaus Fürst GmbH	DE003	World	14109	Measurements	0	7008	MEASUREMENTS	Measurements	21		58458	Skin discolouration	0		197422	13	2020-07-14 08:38:21	2020-07-14 08:38:21	2020-07-17 12:54:26	DE003		17.41		1.001		16.41		1.099		16.31		1.113		16.29		0		0		0.585
16	CP288	86	Prod	1279	80	2081	24	Sanitätshaus Fürst GmbH	DE003	World	14109	Measurements	0	7008	MEASUREMENTS	Measurements	21		58458	Skin discolouration	0		197423	14	2020-07-14 08:38:21	2020-07-14 08:38:21	2020-07-17 12:54:26	DE003		19.31		3.449		15.86		6.116		13.2		7.457		11.85		0		0.038		0.47
16	CP288	86	Prod	1279	80	2081	24	Sanitätshaus Fürst GmbH	DE003	World	14109	Measurements	0	7008	MEASUREMENTS	Measurements	21		58458	Skin discolouration	0		197424	15	2020-07-14 08:38:21	2020-07-14 08:38:21	2020-07-17 12:54:26	DE003		17.85		2.939		14.91		4.464		13.39		5.779		12.07		0		0		0
16	CP288	86	Prod	1279	80	2081	24	Sanitätshaus Fürst GmbH	DE003	World	14109	Measurements	0	7008	MEASUREMENTS	Measurements	21		58458	Skin discolouration	0		197425	16	2020-07-14 08:38:21	2020-07-14 08:38:21	2020-07-17 12:54:26	DE003		16.03		1.32		14.71		1.354		14.67		1.381		14.64		0		0		0.184
16	CP288	86	Prod	1279	80	2081	24	Sanitätshaus Fürst GmbH	DE003	World	14109	Measurements	0	7008	MEASUREMENTS	Measurements	21		58458	Skin discolouration	0		197426	17	2020-07-14 08:38:21	2020-07-14 08:38:21	2020-07-17 12:54:26	DE003		35.25		2.744		32.5		4.468		30.78		6.256		28.99		0.068		0.819		5.569
16	CP288	86	Prod	1279	80	2081	24	Sanitätshaus Fürst GmbH	DE003	World	14109	Measurements	0	7008	MEASUREMENTS	Measurements	21		58458	Skin discolouration	0		197427	18	2020-07-14 08:38:21	2020-07-14 08:38:21	2020-07-17 12:54:26	DE003		28.63		2.623		26.01		4.942		23.69		5.603		23.03		0		0.003		0.013
16	CP288	86	Prod	1279	80	2081	24	Sanitätshaus Fürst GmbH	DE003	World	14109	Measurements	0	7008	MEASUREMENTS	Measurements	21		58458	Skin discolouration	0		197428	19	2020-07-14 08:38:21	2020-07-14 08:38:21	2020-07-17 12:54:26	DE003		19.22		1.976		17.25		2.452		16.77		2.678		16.54		0.005		0.028		0.099
16	CP288	86	Prod	1279	80	2081	24	Sanitätshaus Fürst GmbH	DE003	World	14109	Measurements	0	7008	MEASUREMENTS	Measurements	21		58458	Skin discolouration	0		197429	20	2020-07-14 08:38:21	2020-07-14 08:38:21	2020-07-17 12:54:26	DE003		19.72		1.906		17.81		2.838		16.88		3.356		16.36		0		0.003		0.013
16	CP288	86	Prod	1279	80	2081	24	Sanitätshaus Fürst GmbH	DE003	World	14109	Measurements	0	7008	MEASUREMENTS	Measurements	21		58458	Skin discolouration	0		197430	21	2020-07-14 08:38:21	2020-07-14 08:38:21	2020-07-17 12:54:26	DE003		16.94		1.971		14.97		3.301		13.64		4.48		12.46		0		0.166		1.242
16	CP288	86	Prod	1279	80	2081	24	Sanitätshaus Fürst GmbH	DE003	World	14109	Measurements	0	7008	MEASUREMENTS	Measurements	21		58458	Skin discolouration	0		197431	22	2020-07-14 08:38:21	2020-07-14 08:38:21	2020-07-17 12:54:26	DE003		19.9		2.605		17.3		2.917		16.99		2.929		16.97		0.006		0.107		0.362
16	CP288	86	Prod	1279	80	2081	24	Sanitätshaus Fürst GmbH	DE003	World	14109	Measurements	0	7008	MEASUREMENTS	Measurements	21		58458	Skin discolouration	0		197432	23	2020-07-14 08:38:21	2020-07-14 08:38:21	2020-07-17 12:54:26	DE003		10.78		2.634		8.147		3.499		7.283		3.502		7.28		0.001		0.022		0.526
16	CP288	86	Prod	1279	80	2081	24	Sanitätshaus Fürst GmbH	DE003	World	14109	Measurements	0	7008	MEASUREMENTS	Measurements	21		58458	Skin discolouration	0		197433	24	2020-07-14 08:38:21	2020-07-14 08:38:21	2020-07-17 12:54:26	DE003		20.37		2.44		17.93		4.238		16.14		5.52		14.85		0.011		0.026		0.084
16	CP288	86	Prod	1279	80	2081	24	Sanitätshaus Fürst GmbH	DE003	World	14109	Measurements	0	7008	MEASUREMENTS	Measurements	21		58458	Skin discolouration	0		197434	25	2020-07-14 08:38:21	2020-07-14 08:38:21	2020-07-17 12:54:26	DE003		19.15		1.665		17.48		2.309		16.84		2.358		16.79		0.004		0.006		0.199
16	CP288	86	Prod	1279	80	2081	24	Sanitätshaus Fürst GmbH	DE003	World	14109	Measurements	0	7008	MEASUREMENTS	Measurements	21		58458	Skin discolouration	0		197435	26	2020-07-14 08:38:21	2020-07-14 08:38:21	2020-07-17 12:54:26	DE003		8.33		2.304		6.03		4.153		4.181		4.873		3.462		0		0.028		0.688
16	CP288	86	Prod	1279	80	2081	24	Sanitätshaus Fürst GmbH	DE003	World	14109	Measurements	0	7008	MEASUREMENTS	Measurements	21		58458	Skin discolouration	0		197436	27	2020-07-14 08:38:21	2020-07-14 08:38:21	2020-07-17 12:54:26	DE003		19.54		2.51		17.03		3.656		15.89		3.672		15.87		0		0		0.15
16	CP288	86	Prod	1279	80	2081	24	Sanitätshaus Fürst GmbH	DE003	World	14109	Measurements	0	7008	MEASUREMENTS	Measurements	21		58458	Skin discolouration	0		197437	28	2020-07-14 08:38:21	2020-07-14 08:38:21	2020-07-17 12:54:26	DE003		12.01		2.148		9.871		3.049		8.97		3.189		8.83		0		0		0.007
16	CP288	86	Prod	1279	80	2081	24	Sanitätshaus Fürst GmbH	DE003	World	14109	Measurements	0	7008	MEASUREMENTS	Measurements	21		58458	Skin discolouration	0		197438	29	2020-07-14 08:38:21	2020-07-14 08:38:21	2020-07-17 12:54:26	DE003		20.55		2.71		17.84		4.833		15.72		5.54		15.01		0		0.001		0.049
16	CP288	86	Prod	1279	80	2081	24	Sanitätshaus Fürst GmbH	DE003	World	14109	Measurements	0	7008	MEASUREMENTS	Measurements	21		58458	Skin discolouration	0		197439	30	2020-07-14 08:38:21	2020-07-14 08:38:21	2020-07-17 12:54:26	DE003		34.49		2.503		31.99		4.193		30.3		4.386		30.11		0		0.012		1.412
16	CP288	86	Prod	1279	80	2081	24	Sanitätshaus Fürst GmbH	DE003	World	14109	Measurements	0	7008	MEASUREMENTS	Measurements	21		58458	Skin discolouration	0		197440	31	2020-07-14 08:38:21	2020-07-14 08:38:21	2020-07-17 12:54:26	DE003		18.96		2.215		16.74		2.907		16.05		2.954		16		0		0.003		0.338
16	CP288	86	Prod	1279	80	2081	24	Sanitätshaus Fürst GmbH	DE003	World	14109	Measurements	0	7008	MEASUREMENTS	Measurements	21		58458	Skin discolouration	0		197441	32	2020-07-14 08:38:21	2020-07-14 08:38:21	2020-07-17 12:54:26	DE003		32.58		0.951		31.62		1.379		31.2		2.286		30.29		0		0		0
16	CP288	86	Prod	1279	80	2081	24	Sanitätshaus Fürst GmbH	DE003	World	14109	Measurements	0	7008	MEASUREMENTS	Measurements	21		58458	Skin discolouration	0		197442	33	2020-07-14 08:38:21	2020-07-14 08:38:21	2020-07-17 12:54:26	DE003		14.21		3.547		10.67		5.918		8.3		7.815		6.403		0		0.001		0.019
16	CP288	86	Prod	1279	80	2081	24	Sanitätshaus Fürst GmbH	DE003	World	14109	Measurements	0	7008	MEASUREMENTS	Measurements	21		58458	Skin discolouration	0		197443	34	2020-07-14 08:38:21	2020-07-14 08:38:21	2020-07-17 12:54:26	DE003		30.89		1.797		29.1		2.706		28.19		3.314		27.58		0		0		0.004
16	CP288	86	Prod	1279	80	2081	24	Sanitätshaus Fürst GmbH	DE003	World	14109	Measurements	0	7008	MEASUREMENTS	Measurements	21		58458	Skin discolouration	0		197444	35	2020-07-14 08:38:21	2020-07-14 08:38:21	2020-07-17 12:54:26	DE003		5.99		1.492		4.5		1.506		4.487		1.506		4.487		0		0		0
16	CP288	86	Prod	1279	80	2081	24	Sanitätshaus Fürst GmbH	DE003	World	14109	Measurements	0	7008	MEASUREMENTS	Measurements	21		58458	Skin discolouration	0		197445	36	2020-07-14 08:38:21	2020-07-14 08:38:21	2020-07-17 12:54:26	DE003		28.01		2.253		25.75		2.659		25.35		2.842		25.17		0		0		0.002
16	CP288	86	Prod	1280	80	2082	24	Sanitätshaus Fürst GmbH	DE003	World	14137	Measurements	0	7008	MEASUREMENTS	Measurements	21		58518	Skin discolouration	0		197843	39	2020-07-14 18:38:14	2020-07-14 18:38:14	2020-07-17 12:54:26	DE003		38.18		7.923		30.26		11.75		26.43		18.58		19.59		0.001		0.002		0.003
16	CP288	86	Prod	1280	80	2082	24	Sanitätshaus Fürst GmbH	DE003	World	14137	Measurements	0	7008	MEASUREMENTS	Measurements	21		58518	Skin discolouration	0		197844	40	2020-07-14 18:38:14	2020-07-14 18:38:14	2020-07-17 12:54:26	DE003		48.68		9.05		39.63		11.39		37.28		19.26		29.42		1.177		1.157		1.824
16	CP288	86	Prod	1280	80	2082	24	Sanitätshaus Fürst GmbH	DE003	World	14137	Measurements	0	7008	MEASUREMENTS	Measurements	21		58518	Skin discolouration	0		197845	41	2020-07-14 18:38:14	2020-07-14 18:38:14	2020-07-17 12:54:26	DE003		27.04		5.247		21.79		5.657		21.38		8.022		19.02		0.741		1.145		1.471
16	CP288	86	Prod	1280	80	2082	24	Sanitätshaus Fürst GmbH	DE003	World	14137	Measurements	0	7008	MEASUREMENTS	Measurements	21		58518	Skin discolouration	0		197846	42	2020-07-14 18:38:14	2020-07-14 18:38:14	2020-07-17 12:54:26	DE003		40.98		8.869		32.11		11.73		29.24		16.05		24.93		0.849		2.954		3.714
16	CP288	86	Prod	1280	80	2082	24	Sanitätshaus Fürst GmbH	DE003	World	14137	Measurements	0	7008	MEASUREMENTS	Measurements	21		58518	Skin discolouration	0		197847	43	2020-07-14 18:38:14	2020-07-14 18:38:14	2020-07-17 12:54:26	DE003		39.35		9.469		29.88		14.29		25.06		22.96		16.38		0.343		2.045		1.925
16	CP288	86	Prod	1280	80	2082	24	Sanitätshaus Fürst GmbH	DE003	World	14137	Measurements	0	7008	MEASUREMENTS	Measurements	21		58518	Skin discolouration	0		197848	44	2020-07-14 18:38:14	2020-07-14 18:38:14	2020-07-17 12:54:26	DE003		20.46		6.434		14.03		7.897		12.56		10.4		10.06		0.012		0.23		2.159
16	CP288	86	Prod	1280	80	2082	24	Sanitätshaus Fürst GmbH	DE003	World	14137	Measurements	0	7008	MEASUREMENTS	Measurements	21		58518	Skin discolouration	0		197849	45	2020-07-14 18:38:14	2020-07-14 18:38:14	2020-07-17 12:54:26	DE003		18.69		4.972		13.71		0.265		18.42		0.072		18.61		0.064		0.753		1.26
16	CP288	86	Prod	1280	80	2082	24	Sanitätshaus Fürst GmbH	DE003	World	14137	Measurements	0	7008	MEASUREMENTS	Measurements	21		58518	Skin discolouration	0		197850	46	2020-07-14 18:38:14	2020-07-14 18:38:14	2020-07-17 12:54:26	DE003		20.55		8.478		12.07		10.62		9.934		15.75		4.795		0.073		0.67		1.308
16	CP288	86	Prod	1280	80	2082	24	Sanitätshaus Fürst GmbH	DE003	World	14137	Measurements	0	7008	MEASUREMENTS	Measurements	21		58518	Skin discolouration	0		197851	47	2020-07-14 18:38:14	2020-07-14 18:38:14	2020-07-17 12:54:26	DE003		18.2		7.679		10.52		12.77		5.427		16.1		2.101		0		0.034		0.394
16	CP288	86	Prod	1280	80	2082	24	Sanitätshaus Fürst GmbH	DE003	World	14137	Measurements	0	7008	MEASUREMENTS	Measurements	21		58518	Skin discolouration	0		197852	48	2020-07-14 18:38:14	2020-07-14 18:38:14	2020-07-17 12:54:26	DE003		27.56		12.85		14.7		17.34		10.22		23.61		3.945		0.302		0.897		0.163
16	CP288	86	Prod	1280	80	2082	24	Sanitätshaus Fürst GmbH	DE003	World	14137	Measurements	0	7008	MEASUREMENTS	Measurements	21		58518	Skin discolouration	0		197853	49	2020-07-14 18:38:14	2020-07-14 18:38:14	2020-07-17 12:54:26	DE003		39.95		7.201		32.75		13.93		26.02		23.42		16.52		0.036		0.701		1.018
16	CP288	86	Prod	1280	80	2082	24	Sanitätshaus Fürst GmbH	DE003	World	14137	Measurements	0	7008	MEASUREMENTS	Measurements	21		58518	Skin discolouration	0		197854	50	2020-07-14 18:38:14	2020-07-14 18:38:14	2020-07-17 12:54:26	DE003		54.49		7.025		47.47		9.29		45.2		15.26		39.23		0.084		2.522		3.26
16	CP288	86	Prod	1280	80	2082	24	Sanitätshaus Fürst GmbH	DE003	World	14137	Measurements	0	7008	MEASUREMENTS	Measurements	21		58518	Skin discolouration	0		197855	51	2020-07-14 18:38:14	2020-07-14 18:38:14	2020-07-17 12:54:26	DE003		46.64		5.691		40.95		10.66		35.97		16.41		30.22		0.105		0.664		1.31
16	CP288	86	Prod	1280	80	2082	24	Sanitätshaus Fürst GmbH	DE003	World	14137	Measurements	0	7008	MEASUREMENTS	Measurements	21		58518	Skin discolouration	0		197856	52	2020-07-14 18:38:14	2020-07-14 18:38:14	2020-07-17 12:54:26	DE003		31.5		18.32		13.17		1.034		30.47		0.934		30.57		0.004		0.046		0.33
16	CP288	86	Prod	1280	80	2082	24	Sanitätshaus Fürst GmbH	DE003	World	14137	Measurements	0	7008	MEASUREMENTS	Measurements	21		58518	Skin discolouration	0		197857	53	2020-07-14 18:38:14	2020-07-14 18:38:14	2020-07-17 12:54:26	DE003		34.91		7.48		27.43		10.98		23.93		16.55		18.36		0.167		1.082		0.939
16	CP288	86	Prod	1280	80	2082	24	Sanitätshaus Fürst GmbH	DE003	World	14137	Measurements	0	7008	MEASUREMENTS	Measurements	21		58518	Skin discolouration	0		197858	54	2020-07-14 18:38:14	2020-07-14 18:38:14	2020-07-17 12:54:26	DE003		25.39		9.057		16.33		11		14.38		16.41		8.978		0.211		1.335		1.974
16	CP288	86	Prod	1280	80	2082	24	Sanitätshaus Fürst GmbH	DE003	World	14137	Measurements	0	7008	MEASUREMENTS	Measurements	21		58518	Skin discolouration	0		197859	55	2020-07-14 18:38:14	2020-07-14 18:38:14	2020-07-17 12:54:26	DE003		31.43		9.239		22.19		14.14		17.29		20.14		11.29		0.005		0.026		0.074
16	CP288	86	Prod	1280	80	2082	24	Sanitätshaus Fürst GmbH	DE003	World	14137	Measurements	0	7008	MEASUREMENTS	Measurements	21		58518	Skin discolouration	0		197860	56	2020-07-14 18:38:14	2020-07-14 18:38:14	2020-07-17 12:54:26	DE003		35.52		7.909		27.61		11.63		23.89		18.82		16.69		0.007		0.149		1.26
16	CP288	86	Prod	1280	80	2082	24	Sanitätshaus Fürst GmbH	DE003	World	14137	Measurements	0	7008	MEASUREMENTS	Measurements	21		58518	Skin discolouration	0		197861	57	2020-07-14 18:38:14	2020-07-14 18:38:14	2020-07-17 12:54:26	DE003		24.19		5.077		19.12		6.4		17.8		10.23		13.96		0.376		0.731		2.664
16	CP288	86	Prod	1280	80	2082	24	Sanitätshaus Fürst GmbH	DE003	World	14137	Measurements	0	7008	MEASUREMENTS	Measurements	21		58518	Skin discolouration	0		197862	58	2020-07-14 18:38:14	2020-07-14 18:38:14	2020-07-17 12:54:26	DE003		20.26		3.654		16.6		6.48		13.78		11.08		9.173		0.002		0.026		0.152
16	CP288	86	Prod	1280	80	2082	24	Sanitätshaus Fürst GmbH	DE003	World	14137	Measurements	0	7008	MEASUREMENTS	Measurements	21		58518	Skin discolouration	0		197863	59	2020-07-14 18:38:14	2020-07-14 18:38:14	2020-07-17 12:54:26	DE003		22.51		10.32		12.19		12.41		10.09		14.12		8.388		0.033		0.105		0.091
16	CP288	86	Prod	1280	80	2082	24	Sanitätshaus Fürst GmbH	DE003	World	14137	Measurements	0	7008	MEASUREMENTS	Measurements	21		58518	Skin discolouration	0		197864	60	2020-07-14 18:38:14	2020-07-14 18:38:14	2020-07-17 12:54:26	DE003		22.01		4.671		17.34		6.968		15.05		11.86		10.15		0.017		0.549		1.523
16	CP288	86	Prod	1280	80	2082	24	Sanitätshaus Fürst GmbH	DE003	World	14137	Measurements	0	7008	MEASUREMENTS	Measurements	21		58518	Skin discolouration	0		197865	61	2020-07-14 18:38:14	2020-07-14 18:38:14	2020-07-17 12:54:26	DE003		22.28		10.33		11.94		11.94		10.33		14.65		7.63		0.003		0.029		0.155
16	CP288	86	Prod	1280	80	2082	24	Sanitätshaus Fürst GmbH	DE003	World	14137	Measurements	0	7008	MEASUREMENTS	Measurements	21		58518	Skin discolouration	0		197866	62	2020-07-14 18:38:14	2020-07-14 18:38:14	2020-07-17 12:54:26	DE003		29.31		6.285		23.02		9.31		20		14.44		14.86		0.068		1.058		3.031
16	CP288	86	Prod	1280	80	2082	24	Sanitätshaus Fürst GmbH	DE003	World	14137	Measurements	0	7008	MEASUREMENTS	Measurements	21		58518	Skin discolouration	0		197867	63	2020-07-14 18:38:14	2020-07-14 18:38:14	2020-07-17 12:54:26	DE003		36.98		9.103		27.87		13.67		23.3		18.94		18.03		0.055		0.394		1.573
16	CP288	86	Prod	1280	80	2082	24	Sanitätshaus Fürst GmbH	DE003	World	14137	Measurements	0	7008	MEASUREMENTS	Measurements	21		58518	Skin discolouration	0		197868	64	2020-07-14 18:38:14	2020-07-14 18:38:14	2020-07-17 12:54:26	DE003		52.9		4.44		48.46		9.146		43.76		15.03		37.87		0.022		0.032		0.05
16	CP288	86	Prod	1280	80	2082	24	Sanitätshaus Fürst GmbH	DE003	World	14137	Measurements	0	7008	MEASUREMENTS	Measurements	21		58518	Skin discolouration	0		197869	65	2020-07-14 18:38:14	2020-07-14 18:38:14	2020-07-17 12:54:26	DE003		22.58		4.641		17.94		6.614		15.97		12.76		9.82		0		0.001		0.003
16	CP288	86	Prod	1280	80	2082	24	Sanitätshaus Fürst GmbH	DE003	World	14137	Measurements	0	7008	MEASUREMENTS	Measurements	21		58518	Skin discolouration	0		197870	66	2020-07-14 18:38:14	2020-07-14 18:38:14	2020-07-17 12:54:26	DE003		39.78		13.78		25.99		0.689		39.09		0.557		39.22		0.002		0.04		0.047
16	CP288	86	Prod	1280	80	2082	24	Sanitätshaus Fürst GmbH	DE003	World	14137	Measurements	0	7008	MEASUREMENTS	Measurements	21		58518	Skin discolouration	0		197871	67	2020-07-14 18:38:14	2020-07-14 18:38:14	2020-07-17 12:54:26	DE003		24.41		7.103		17.3		8.707		15.7		10.3		14.1		0.795		2.666		1.308
16	CP288	86	Prod	1280	80	2082	24	Sanitätshaus Fürst GmbH	DE003	World	14137	Measurements	0	7008	MEASUREMENTS	Measurements	21		58518	Skin discolouration	0		197872	68	2020-07-14 18:38:14	2020-07-14 18:38:14	2020-07-17 12:54:26	DE003		51.72		6.464		45.26		8.612		43.11		15.12		36.6		0		0		0.087
16	CP288	86	Prod	1280	80	2082	24	Sanitätshaus Fürst GmbH	DE003	World	14137	Measurements	0	7008	MEASUREMENTS	Measurements	21		58518	Skin discolouration	0		197873	69	2020-07-14 18:38:14	2020-07-14 18:38:14	2020-07-17 12:54:26	DE003		35.37		5.99		29.38		9.224		26.15		13.28		22.09		0.334		2.306		2.946
16	CP288	86	Prod	1280	80	2082	24	Sanitätshaus Fürst GmbH	DE003	World	14137	Measurements	0	7008	MEASUREMENTS	Measurements	21		58518	Skin discolouration	0		197874	70	2020-07-14 18:38:14	2020-07-14 18:38:14	2020-07-17 12:54:26	DE003		16.59		5.542		11.05		5.94		10.65		6.789		9.804		0.02		0.96		4.407
16	CP288	86	Prod	1280	80	2082	24	Sanitätshaus Fürst GmbH	DE003	World	14137	Measurements	0	7008	MEASUREMENTS	Measurements	21		58518	Skin discolouration	0		197875	71	2020-07-14 18:38:14	2020-07-14 18:38:14	2020-07-17 12:54:26	DE003		41.83		7.289		34.54		13.58		28.25		20.28		21.54		0.668		2.08		2.515
16	CP288	86	Prod	1280	80	2082	24	Sanitätshaus Fürst GmbH	DE003	World	14137	Measurements	0	7008	MEASUREMENTS	Measurements	21		58518	Skin discolouration	0		197876	72	2020-07-14 18:38:14	2020-07-14 18:38:14	2020-07-17 12:54:26	DE003		44.53		7.379		37.15		10.16		34.37		14.41		30.12		0.001		0.714		2.535
16	CP288	86	Prod	1280	80	2082	24	Sanitätshaus Fürst GmbH	DE003	World	14137	Measurements	0	7008	MEASUREMENTS	Measurements	21		58518	Skin discolouration	0		197877	73	2020-07-14 18:38:14	2020-07-14 18:38:14	2020-07-17 12:54:26	DE003		42.95		6.928		36.03		11.52		31.43		17.61		25.34		0.498		1.767		1.21
16	CP288	86	Prod	1280	80	2082	24	Sanitätshaus Fürst GmbH	DE003	World	14137	Measurements	0	7008	MEASUREMENTS	Measurements	21		58518	Skin discolouration	0		197878	74	2020-07-14 18:38:14	2020-07-14 18:38:14	2020-07-17 12:54:26	DE003		45.49		5.71		39.78		8.423		37.07		12.47		33.01		1.414		2.843		2.268
16	CP288	86	Prod	1280	80	2082	24	Sanitätshaus Fürst GmbH	DE003	World	14137	Measurements	0	7008	MEASUREMENTS	Measurements	21		58518	Skin discolouration	0		197879	75	2020-07-14 18:38:14	2020-07-14 18:38:14	2020-07-17 12:54:26	DE003		15.3		7.342		7.968		8.487		6.823		10.48		4.821		0.045		0.68		1.39
16	CP288	86	Prod	1281	80	2083	24	Sanitätshaus Fürst GmbH	DE003	World	14168	Measurements	0	7008	MEASUREMENTS	Measurements	21		58578	Skin discolouration	0		197937	82	2020-07-14 18:38:18	2020-07-14 18:38:18	2020-07-17 12:54:26	DE003		12.7		3.809		8.893		0.378		12.32		0.27		12.43		0		0		0.008
16	CP288	86	Prod	1281	80	2083	24	Sanitätshaus Fürst GmbH	DE003	World	14168	Measurements	0	7008	MEASUREMENTS	Measurements	21		58578	Skin discolouration	0		197938	83	2020-07-14 18:38:18	2020-07-14 18:38:18	2020-07-17 12:54:26	DE003		4.92		4.193		0.735		4.836		0.091		4.913		0.014		0		0		0
16	CP288	86	Prod	1281	80	2083	24	Sanitätshaus Fürst GmbH	DE003	World	14168	Measurements	0	7008	MEASUREMENTS	Measurements	21		58578	Skin discolouration	0		197939	84	2020-07-14 18:38:18	2020-07-14 18:38:18	2020-07-17 12:54:26	DE003		9.36		4.673		4.697		4.892		4.477		4.987		4.383		0		0		1.307
16	CP288	86	Prod	1281	80	2083	24	Sanitätshaus Fürst GmbH	DE003	World	14168	Measurements	0	7008	MEASUREMENTS	Measurements	21		58578	Skin discolouration	0		197940	85	2020-07-14 18:38:18	2020-07-14 18:38:18	2020-07-17 12:54:26	DE003		3.96		3.864		0.096		3.956		0.004		3.956		0.004		0.009		0.26		0.408
16	CP288	86	Prod	1281	80	2083	24	Sanitätshaus Fürst GmbH	DE003	World	14168	Measurements	0	7008	MEASUREMENTS	Measurements	21		58578	Skin discolouration	0		197941	86	2020-07-14 18:38:18	2020-07-14 18:38:18	2020-07-17 12:54:26	DE003		2.51		2.115		0.401		2.275		0.241		2.39		0.127		0.022		0.049		0.143
16	CP288	86	Prod	1281	80	2083	24	Sanitätshaus Fürst GmbH	DE003	World	14168	Measurements	0	7008	MEASUREMENTS	Measurements	21		58578	Skin discolouration	0		197942	87	2020-07-14 18:38:18	2020-07-14 18:38:18	2020-07-17 12:54:26	DE003		4.73		3.753		0.986		4.082		0.657		4.082		0.657		0		0		0
16	CP288	86	Prod	1281	80	2083	24	Sanitätshaus Fürst GmbH	DE003	World	14168	Measurements	0	7008	MEASUREMENTS	Measurements	21		58578	Skin discolouration	0		197943	88	2020-07-14 18:38:18	2020-07-14 18:38:18	2020-07-17 12:54:26	DE003		5.52		4.728		0.801		5.487		0.042		5.528		0.001		0		0.001		0.004
16	CP288	86	Prod	1281	80	2083	24	Sanitätshaus Fürst GmbH	DE003	World	14168	Measurements	0	7008	MEASUREMENTS	Measurements	21		58578	Skin discolouration	0		197944	89	2020-07-14 18:38:18	2020-07-14 18:38:18	2020-07-17 12:54:26	DE003		11.56		3.407		8.156		4.561		7.003		6.245		5.318		0		0		0.195
16	CP288	86	Prod	1281	80	2083	24	Sanitätshaus Fürst GmbH	DE003	World	14168	Measurements	0	7008	MEASUREMENTS	Measurements	21		58578	Skin discolouration	0		197945	90	2020-07-14 18:38:18	2020-07-14 18:38:18	2020-07-17 12:54:26	DE003		7.1		3.937		3.164		4.012		3.09		4.096		3.005		1.104		2.015		0.11
16	CP288	86	Prod	1281	80	2083	24	Sanitätshaus Fürst GmbH	DE003	World	14168	Measurements	0	7008	MEASUREMENTS	Measurements	21		58578	Skin discolouration	0		197946	91	2020-07-14 18:38:18	2020-07-14 18:38:18	2020-07-17 12:54:26	DE003		7.28		5.682		1.599		6.778		0.503		6.892		0.389		0.132		0.622		1.229
16	CP288	86	Prod	1281	80	2083	24	Sanitätshaus Fürst GmbH	DE003	World	14168	Measurements	0	7008	MEASUREMENTS	Measurements	21		58578	Skin discolouration	0		197947	92	2020-07-14 18:38:18	2020-07-14 18:38:18	2020-07-17 12:54:26	DE003		4.2		3.669		0.532		4.201		0		4.201		0		0.137		0.437		0.771
16	CP288	86	Prod	1281	80	2083	24	Sanitätshaus Fürst GmbH	DE003	World	14168	Measurements	0	7008	MEASUREMENTS	Measurements	21		58578	Skin discolouration	0		197948	93	2020-07-14 18:38:18	2020-07-14 18:38:18	2020-07-17 12:54:26	DE003		4.47		3.743		0.73		4.445		0.028		4.473		0		0.043		0.808		0.47
16	CP288	86	Prod	1281	80	2083	24	Sanitätshaus Fürst GmbH	DE003	World	14168	Measurements	0	7008	MEASUREMENTS	Measurements	21		58578	Skin discolouration	0		197949	94	2020-07-14 18:38:18	2020-07-14 18:38:18	2020-07-17 12:54:26	DE003		3.46		3.445		0.02		3.461		0.005		3.461		0.005		0.005		0.038		0.114
16	CP288	86	Prod	1281	80	2083	24	Sanitätshaus Fürst GmbH	DE003	World	14168	Measurements	0	7008	MEASUREMENTS	Measurements	21		58578	Skin discolouration	0		197950	95	2020-07-14 18:38:18	2020-07-14 18:38:18	2020-07-17 12:54:26	DE003		5.61		4.093		1.521		5.396		0.218		5.613		0		0		0		0
16	CP288	86	Prod	1281	80	2083	24	Sanitätshaus Fürst GmbH	DE003	World	14168	Measurements	0	7008	MEASUREMENTS	Measurements	21		58578	Skin discolouration	0		197951	96	2020-07-14 18:38:18	2020-07-14 18:38:18	2020-07-17 12:54:26	DE003		4.94		3.139		1.806		3.942		1.003		4.457		0.488		0		0.026		0.381
16	CP288	86	Prod	1281	80	2083	24	Sanitätshaus Fürst GmbH	DE003	World	14168	Measurements	0	7008	MEASUREMENTS	Measurements	21		58578	Skin discolouration	0		197952	97	2020-07-14 18:38:18	2020-07-14 18:38:18	2020-07-17 12:54:26	DE003		5.22		3.843		1.386		5.147		0.082		5.229		0		0		0		0.001
16	CP288	86	Prod	1281	80	2083	24	Sanitätshaus Fürst GmbH	DE003	World	14168	Measurements	0	7008	MEASUREMENTS	Measurements	21		58578	Skin discolouration	0		197953	98	2020-07-14 18:38:18	2020-07-14 18:38:18	2020-07-17 12:54:26	DE003		15.04		6.323		8.718		9.604		5.437		11.22		3.813		0.125		2.417		1.725
16	CP288	86	Prod	1281	80	2083	24	Sanitätshaus Fürst GmbH	DE003	World	14168	Measurements	0	7008	MEASUREMENTS	Measurements	21		58578	Skin discolouration	0		197954	99	2020-07-14 18:38:18	2020-07-14 18:38:18	2020-07-17 12:54:26	DE003		2.46		2.35		0.116		2.466		0		2.466		0		0.149		0.351		0.329
16	CP288	86	Prod	1281	80	2083	24	Sanitätshaus Fürst GmbH	DE003	World	14168	Measurements	0	7008	MEASUREMENTS	Measurements	21		58578	Skin discolouration	0		197955	100	2020-07-14 18:38:18	2020-07-14 18:38:18	2020-07-17 12:54:26	DE003		6.03		4.464		1.576		5.331		0.709		5.427		0.613		0		0.006		0.509
16	CP288	86	Prod	1281	80	2083	24	Sanitätshaus Fürst GmbH	DE003	World	14168	Measurements	0	7008	MEASUREMENTS	Measurements	21		58578	Skin discolouration	0		197956	101	2020-07-14 18:38:18	2020-07-14 18:38:18	2020-07-17 12:54:26	DE003		5.03		4.384		0.649		5.006		0.026		5.006		0.026		0		0		0
16	CP288	86	Prod	1281	80	2083	24	Sanitätshaus Fürst GmbH	DE003	World	14168	Measurements	0	7008	MEASUREMENTS	Measurements	21		58578	Skin discolouration	0		197957	102	2020-07-14 18:38:18	2020-07-14 18:38:18	2020-07-17 12:54:26	DE003		7.61		5.7		1.92		7.462		0.157		7.567		0.053		0		0.005		0.039
16	CP288	86	Prod	1281	80	2083	24	Sanitätshaus Fürst GmbH	DE003	World	14168	Measurements	0	7008	MEASUREMENTS	Measurements	21		58578	Skin discolouration	0		197958	103	2020-07-14 18:38:18	2020-07-14 18:38:18	2020-07-17 12:54:26	DE003		4.28		1.901		2.384		2.325		1.96		2.784		1.501		0.017		0.036		0.088
16	CP288	86	Prod	1281	80	2083	24	Sanitätshaus Fürst GmbH	DE003	World	14168	Measurements	0	7008	MEASUREMENTS	Measurements	21		58578	Skin discolouration	0		197959	104	2020-07-14 18:38:18	2020-07-14 18:38:18	2020-07-17 12:54:26	DE003		3.09		2.827		0.263		3.091		0		3.091		0		0.398		0.62		0.755
16	CP288	86	Prod	1281	80	2083	24	Sanitätshaus Fürst GmbH	DE003	World	14168	Measurements	0	7008	MEASUREMENTS	Measurements	21		58578	Skin discolouration	0		197960	105	2020-07-14 18:38:18	2020-07-14 18:38:18	2020-07-17 12:54:26	DE003		8.85		5.438		3.412		7.918		0.933		8.6		0.25		0.062		1.4		1.23
16	CP288	86	Prod	1281	80	2083	24	Sanitätshaus Fürst GmbH	DE003	World	14168	Measurements	0	7008	MEASUREMENTS	Measurements	21		58578	Skin discolouration	0		197961	106	2020-07-14 18:38:18	2020-07-14 18:38:18	2020-07-17 12:54:26	DE003		7.85		3.339		4.516		4.478		3.377		5.062		2.793		0.001		0.014		0.077
16	CP288	86	Prod	1281	80	2083	24	Sanitätshaus Fürst GmbH	DE003	World	14168	Measurements	0	7008	MEASUREMENTS	Measurements	21		58578	Skin discolouration	0		197962	107	2020-07-14 18:38:18	2020-07-14 18:38:18	2020-07-17 12:54:26	DE003		7.25		4.287		2.968		4.902		2.352		5.043		2.211		0.014		0.036		0.396
16	CP288	86	Prod	1281	80	2083	24	Sanitätshaus Fürst GmbH	DE003	World	14168	Measurements	0	7008	MEASUREMENTS	Measurements	21		58578	Skin discolouration	0		197963	108	2020-07-14 18:38:18	2020-07-14 18:38:18	2020-07-17 12:54:26	DE003		2.75		2.745		0.013		2.754		0.004		2.754		0.004		0		0.021		0.052
16	CP288	86	Prod	1281	80	2083	24	Sanitätshaus Fürst GmbH	DE003	World	14168	Measurements	0	7008	MEASUREMENTS	Measurements	21		58578	Skin discolouration	0		197964	109	2020-07-14 18:38:18	2020-07-14 18:38:18	2020-07-17 12:54:26	DE003		10.19		3.173		7.021		4.515		5.68		5.309		4.886		0.003		0.098		3.83
16	CP288	86	Prod	1281	80	2083	24	Sanitätshaus Fürst GmbH	DE003	World	14168	Measurements	0	7008	MEASUREMENTS	Measurements	21		58578	Skin discolouration	0		197965	110	2020-07-14 18:38:18	2020-07-14 18:38:18	2020-07-17 12:54:26	DE003		5.52		4.24		1.288		5.401		0.127		5.528		0		0.002		0.006		0.682
16	CP288	86	Prod	1281	80	2083	24	Sanitätshaus Fürst GmbH	DE003	World	14168	Measurements	0	7008	MEASUREMENTS	Measurements	21		58578	Skin discolouration	0		197966	111	2020-07-14 18:38:18	2020-07-14 18:38:18	2020-07-17 12:54:26	DE003		5.05		4.345		0.715		4.964		0.095		5.059		0		0.004		0.647		1.142
16	CP288	86	Prod	1281	80	2083	24	Sanitätshaus Fürst GmbH	DE003	World	14168	Measurements	0	7008	MEASUREMENTS	Measurements	21		58578	Skin discolouration	0		197967	112	2020-07-14 18:38:18	2020-07-14 18:38:18	2020-07-17 12:54:26	DE003		8.56		3.301		5.264		3.983		4.582		4.635		3.93		0.006		0.435		4.34
16	CP288	86	Prod	1281	80	2083	24	Sanitätshaus Fürst GmbH	DE003	World	14168	Measurements	0	7008	MEASUREMENTS	Measurements	21		58578	Skin discolouration	0		197968	113	2020-07-14 18:38:18	2020-07-14 18:38:18	2020-07-17 12:54:26	DE003		13.55		3.863		9.691		5.267		8.288		6.387		7.167		0		0.001		0.448
16	CP288	86	Prod	1281	80	2083	24	Sanitätshaus Fürst GmbH	DE003	World	14168	Measurements	0	7008	MEASUREMENTS	Measurements	21		58578	Skin discolouration	0		197969	114	2020-07-14 18:38:18	2020-07-14 18:38:18	2020-07-17 12:54:26	DE003		3.8		3.538		0.272		3.81		0		3.81		0		0.003		0.002		0.002
16	CP288	86	Prod	1281	80	2083	24	Sanitätshaus Fürst GmbH	DE003	World	14168	Measurements	0	7008	MEASUREMENTS	Measurements	21		58578	Skin discolouration	0		197970	115	2020-07-14 18:38:18	2020-07-14 18:38:18	2020-07-17 12:54:26	DE003		6.01		4.999		1.018		6.017		0		6.017		0		0		0.331		1.373
16	CP288	86	Prod	1281	80	2083	24	Sanitätshaus Fürst GmbH	DE003	World	14168	Measurements	0	7008	MEASUREMENTS	Measurements	21		58578	Skin discolouration	0		197971	116	2020-07-14 18:38:18	2020-07-14 18:38:18	2020-07-17 12:54:26	DE003		13.01		5.15		7.861		6.404		6.607		6.756		6.256		0		0.017		1.446
16	CP288	86	Prod	1281	80	2083	24	Sanitätshaus Fürst GmbH	DE003	World	14168	Measurements	0	7008	MEASUREMENTS	Measurements	21		58578	Skin discolouration	0		197972	117	2020-07-14 18:38:18	2020-07-14 18:38:18	2020-07-17 12:54:26	DE003		4.91		3.226		1.689		4.199		0.716		4.398		0.517		0		0		0.002
16	CP288	86	Prod	1281	80	2083	24	Sanitätshaus Fürst GmbH	DE003	World	14168	Measurements	0	7008	MEASUREMENTS	Measurements	21		58578	Skin discolouration	0		197973	118	2020-07-14 18:38:18	2020-07-14 18:38:18	2020-07-17 12:54:26	DE003		3.79		3.603		0.193		3.759		0.036		3.759		0.036		0		0		0
16	CP288	86	Prod	1281	80	2083	24	Sanitätshaus Fürst GmbH	DE003	World	14168	Measurements	0	7008	MEASUREMENTS	Measurements	21		58578	Skin discolouration	0		197974	119	2020-07-14 18:38:18	2020-07-14 18:38:18	2020-07-17 12:54:26	DE003		4.3		3.963		0.342		4.305		0		4.305		0		0		0		0
16	CP288	86	Prod	1281	80	2083	24	Sanitätshaus Fürst GmbH	DE003	World	14168	Measurements	0	7008	MEASUREMENTS	Measurements	21		58578	Skin discolouration	0		197975	120	2020-07-14 18:38:18	2020-07-14 18:38:18	2020-07-17 12:54:26	DE003		2.22		2.188		0.039		2.228		0		2.228		0		0		0.002		0.059
16	CP288	86	Prod	1281	80	2083	24	Sanitätshaus Fürst GmbH	DE003	World	14168	Measurements	0	7008	MEASUREMENTS	Measurements	21		58578	Skin discolouration	0		197976	121	2020-07-14 18:38:18	2020-07-14 18:38:18	2020-07-17 12:54:26	DE003		4.68		4.065		0.624		4.518		0.172		4.558		0.132		0.336		0.904		0.571
16	CP288	86	Prod	1281	80	2083	24	Sanitätshaus Fürst GmbH	DE003	World	14168	Measurements	0	7008	MEASUREMENTS	Measurements	21		58578	Skin discolouration	0		197977	122	2020-07-14 18:38:18	2020-07-14 18:38:18	2020-07-17 12:54:26	DE003		3.26		3.157		0.105		3.262		0		3.262		0		0.005		0.272		0.3
16	CP288	86	Prod	1281	80	2083	24	Sanitätshaus Fürst GmbH	DE003	World	14168	Measurements	0	7008	MEASUREMENTS	Measurements	21		58578	Skin discolouration	0		197978	123	2020-07-14 18:38:18	2020-07-14 18:38:18	2020-07-17 12:54:26	DE003		3.55		3.391		0.161		3.551		0		3.551		0		0.05		0.207		0.286
16	CP288	86	Prod	1281	80	2083	24	Sanitätshaus Fürst GmbH	DE003	World	14168	Measurements	0	7008	MEASUREMENTS	Measurements	21		58578	Skin discolouration	0		197979	124	2020-07-14 18:38:18	2020-07-14 18:38:18	2020-07-17 12:54:26	DE003		8.25		5.47		2.78		6.419		1.831		6.522		1.728		0		0		0
16	CP288	86	Prod	1281	80	2083	24	Sanitätshaus Fürst GmbH	DE003	World	14168	Measurements	0	7008	MEASUREMENTS	Measurements	21		58578	Skin discolouration	0		197980	125	2020-07-14 18:38:18	2020-07-14 18:38:18	2020-07-17 12:54:26	DE003		3.11		2.558		0.554		3.111		0.002		3.113		0		0.025		0.117		0.189
16	CP288	86	Prod	1281	80	2083	24	Sanitätshaus Fürst GmbH	DE003	World	14168	Measurements	0	7008	MEASUREMENTS	Measurements	21		58578	Skin discolouration	0		197981	126	2020-07-14 18:38:18	2020-07-14 18:38:18	2020-07-17 12:54:26	DE003		3.86		3.633		0.233		3.809		0.057		3.846		0.02		0		0.001		0.006
[truncated: 1,308 more rows]
[truncated: 58 more columns]
