# Supplementary material for: Psychometric validation of the Ostomy Skin Tool 2.0
Source: PeerJ. 2023 Dec 18;11:e16685. doi: 10.7717/peerj.16685 (PMC10734405; doi:10.7717/peerj.16685)
Supplement: Supplemental Information 5 [file peerj-11-16685-s005.xlsx]

## Sheet: skin_area
projectid	project	studyid	environmentName	subjectId	StudySiteId	Subject	siteid	Site	SiteNumber	SiteGroup	instanceId	InstanceName	InstanceRepeatNumber	folderid	Folder	FolderName	FolderSeq	TargetDays	DataPageId	DataPageName	PageRepeatNumber	RecordDate	RecordId	RecordPosition	MinCreated	MaxUpdated	SaveTS	StudyEnvSiteNumber	COMP_FRQ	COMP_FRQ_STD	COMP_CONSULT	COMPLICATION_YN	COMPLICATION_YN_STD	COMPLICATION_IF_YES	COMPLICATION_IF_YES_STD	DISCOLOUR_YN	DISCOLOUR_YN_STD	DISCOLOUR_IF_YES	DISCOLOUR_IF_YES_STD	EROSION_YN	EROSION_YN_STD	EROSION_IF_YES	EROSION_IF_YES_STD	DISCOLOUR_COMP_YN	DISCOLOUR_COMP_YN_STD	EROSION_COMP_YN	EROSION_COMP_YN_STD	TISSUE_COMP_YN	TISSUE_COMP_YN_STD
16	CP288	86	Prod	1093	78	2001	22	Universitätsklinikum Schleswig-Holstein	DE001	World	9104	Visit 1	0	5840	VISIT_1	Visit 1	3	0	47747	Skin area visit 1	0	2020-01-31	131014	0	2020-02-05 10:13:49	2020-07-16 15:40:17	2020-07-17 12:55:38	DE001	Every second week	5	NO	Yes	1	Moderate	3	Yes	1	Moderate	3	Yes	1	Moderate	3	Yes	1	Yes	1	Yes	1
16	CP288	86	Prod	1094	78	2002	22	Universitätsklinikum Schleswig-Holstein	DE001	World	9135	Visit 1	0	5840	VISIT_1	Visit 1	3	0	47807	Skin area visit 1	0	2020-02-05	131094	0	2020-02-05 16:09:26	2020-07-16 15:43:29	2020-07-17 12:55:38	DE001	Every 2-3 days	2	2	Yes	1	Very mild	1	Yes	1	Mild	2	Yes	1	Very mild	1	Yes	1	No	0	No	0
16	CP288	86	Prod	1095	78	2003	22	Universitätsklinikum Schleswig-Holstein	DE001	World	9166	Visit 1	0	5840	VISIT_1	Visit 1	3	0	47867	Skin area visit 1	0	2020-02-06	131174	0	2020-02-06 15:53:43	2020-07-16 15:45:10	2020-07-17 12:55:38	DE001	Once a week	4	NEVER	No	0			No	0			No	0			No	0	No	0	No	0
16	CP288	86	Prod	1096	78	2004	22	Universitätsklinikum Schleswig-Holstein	DE001	World	9197	Visit 1	0	5840	VISIT_1	Visit 1	3	0	47927	Skin area visit 1	0	2020-02-07	131254	0	2020-02-07 08:39:49	2020-07-16 15:46:21	2020-07-17 12:55:38	DE001	Every 2-3 days	2	10	No	0			No	0			No	0			No	0	No	0	No	0
16	CP288	86	Prod	1097	78	2005	22	Universitätsklinikum Schleswig-Holstein	DE001	World	9228	Visit 1	0	5840	VISIT_1	Visit 1	3	0	47987	Skin area visit 1	0	2020-02-07	131365	0	2020-02-07 10:22:21	2020-07-16 15:47:34	2020-07-17 12:55:38	DE001	Every second week	5	0	No	0			No	0			No	0			No	0	No	0	No	0
16	CP288	86	Prod	1098	78	2006	22	Universitätsklinikum Schleswig-Holstein	DE001	World	9259	Visit 1	0	5840	VISIT_1	Visit 1	3	0	48047	Skin area visit 1	0	2020-02-10	131414	0	2020-02-10 10:55:03	2020-07-16 15:49:25	2020-07-17 12:55:38	DE001	Every 2-3 days	2	0	No	0			No	0			No	0			No	0	No	0	No	0
16	CP288	86	Prod	1099	78	2007	22	Universitätsklinikum Schleswig-Holstein	DE001	World	9290	Visit 1	0	5840	VISIT_1	Visit 1	3	0	48107	Skin area visit 1	0	2020-02-11	131525	0	2020-02-11 09:21:59	2020-07-16 15:50:27	2020-07-17 12:55:38	DE001	Every 2-3 days	2	7	Yes	1	Severe	4	Yes	1	Severe	4	Yes	1	Moderate	3	Yes	1	Yes	1	Yes	1
16	CP288	86	Prod	1100	78	2008	22	Universitätsklinikum Schleswig-Holstein	DE001	World	9321	Visit 1	0	5840	VISIT_1	Visit 1	3	0	48167	Skin area visit 1	0	2020-02-17	131574	0	2020-02-17 09:20:38	2020-07-16 15:51:28	2020-07-17 12:55:38	DE001	Daily	1	NO	Yes	1	Mild	2	Yes	1	Mild	2	No	0			Yes	1	No	0	No	0
16	CP288	86	Prod	1101	78	2009	22	Universitätsklinikum Schleswig-Holstein	DE001	World	9352	Visit 1	0	5840	VISIT_1	Visit 1	3	0	48227	Skin area visit 1	0	2020-02-19	131654	0	2020-02-19 08:56:20	2020-07-16 15:52:39	2020-07-17 12:55:38	DE001	Every second week	5	NO	No	0			No	0			No	0			No	0	No	0	No	0
16	CP288	86	Prod	1102	78	2010	22	Universitätsklinikum Schleswig-Holstein	DE001	World	9383	Visit 1	0	5840	VISIT_1	Visit 1	3	0	48287	Skin area visit 1	0	2020-02-19	131734	0	2020-02-19 10:21:27	2020-07-16 15:53:29	2020-07-17 12:55:38	DE001	Every 2-3 days	2	0	No	0			No	0			No	0			No	0	No	0	No	0
16	CP288	86	Prod	1103	81	2041	23	Klinikum der Universitat Munchen- Grosshadern	DE002	World	9414	Visit 1	0	5840	VISIT_1	Visit 1	3	0	48347	Skin area visit 1	0	2020-01-23	131814	0	2020-01-23 13:42:36	2020-06-03 07:37:20	2020-07-17 12:55:38	DE002	Every 4-6 days	3	0	Yes	1	Mild	2	Yes	1	Mild	2	No	0			No	0	No	0	Yes	1
16	CP288	86	Prod	1104	81	2042	23	Klinikum der Universitat Munchen- Grosshadern	DE002	World	9445	Visit 1	0	5840	VISIT_1	Visit 1	3	0	48407	Skin area visit 1	0	2020-01-24	131894	0	2020-01-24 08:41:43	2020-06-03 07:37:31	2020-07-17 12:55:38	DE002	Daily	1	0	Yes	1	Severe	4	Yes	1	Severe	4	No	0			No	0	No	0	No	0
16	CP288	86	Prod	1105	81	2043	23	Klinikum der Universitat Munchen- Grosshadern	DE002	World	9476	Visit 1	0	5840	VISIT_1	Visit 1	3	0	48467	Skin area visit 1	0	2020-01-30	132005	0	2020-01-30 10:25:36	2020-07-14 08:57:35	2020-07-17 12:55:38	DE002	Every 2-3 days	2	35	Yes	1	Mild	2	Yes	1	Mild	2	Yes	1	Mild	2	Yes	1	Yes	1	No	0
16	CP288	86	Prod	1106	81	2044	23	Klinikum der Universitat Munchen- Grosshadern	DE002	World	9507	Visit 1	0	5840	VISIT_1	Visit 1	3	0	48527	Skin area visit 1	0	2020-02-06	132054	0	2020-02-06 15:37:23	2020-06-03 07:37:53	2020-07-17 12:55:38	DE002	Every 2-3 days	2	0	Yes	1	Moderate	3	Yes	1	Moderate	3	Yes	1	Moderate	3	No	0	No	0	No	0
16	CP288	86	Prod	1107	81	2045	23	Klinikum der Universitat Munchen- Grosshadern	DE002	World	9538	Visit 1	0	5840	VISIT_1	Visit 1	3	0	48587	Skin area visit 1	0	2020-02-07	132134	0	2020-02-07 14:50:19	2020-06-03 07:38:13	2020-07-17 12:55:38	DE002	Daily	1	2	Yes	1	Severe	4	Yes	1	Severe	4	Yes	1	Mild	2	Yes	1	No	0	No	0
16	CP288	86	Prod	1108	81	2046	23	Klinikum der Universitat Munchen- Grosshadern	DE002	World	9569	Visit 1	0	5840	VISIT_1	Visit 1	3	0	48647	Skin area visit 1	0	2020-02-17	132214	0	2020-02-17 09:03:32	2020-06-03 07:38:24	2020-07-17 12:55:38	DE002	Every 2-3 days	2	0	Yes	1	Moderate	3	Yes	1	Severe	4	No	0			No	0	No	0	No	0
16	CP288	86	Prod	1109	81	2047	23	Klinikum der Universitat Munchen- Grosshadern	DE002	World	9600	Visit 1	0	5840	VISIT_1	Visit 1	3	0	48707	Skin area visit 1	0	2020-02-24	132325	0	2020-02-24 13:45:59	2020-06-03 07:38:35	2020-07-17 12:55:38	DE002	Daily	1	0	No	0			No	0			No	0			No	0	No	0	No	0
16	CP288	86	Prod	1114	80	2072	24	Sanitätshaus Fürst GmbH	DE003	World	9755	Visit 1	0	5840	VISIT_1	Visit 1	3	0	49007	Skin area visit 1	0	2020-02-03	132694	0	2020-02-03 14:33:21	2020-07-06 18:27:47	2020-07-17 12:55:38	DE003	Once a week	4	15	Yes	1	Very mild	1	No	0	Moderate	3	No	0			No	0	No	0	No	0
16	CP288	86	Prod	1115	80	2073	24	Sanitätshaus Fürst GmbH	DE003	World	9786	Visit 1	0	5840	VISIT_1	Visit 1	3	0	49067	Skin area visit 1	0	2020-02-04	132774	0	2020-02-04 10:00:05	2020-05-26 09:56:18	2020-07-17 12:55:38	DE003	Once a week	4	4	Yes	1	Mild	2	Yes	1	Mild	2	No	0			No	0	No	0	Yes	1
16	CP288	86	Prod	1116	80	2074	24	Sanitätshaus Fürst GmbH	DE003	World	9817	Visit 1	0	5840	VISIT_1	Visit 1	3	0	49127	Skin area visit 1	0	2020-02-05	132854	0	2020-02-05 10:08:25	2020-07-06 18:27:57	2020-07-17 12:55:38	DE003	Every 4-6 days	3	3	No	0			No	0			No	0			No	0	No	0	No	0
16	CP288	86	Prod	1117	80	2075	24	Sanitätshaus Fürst GmbH	DE003	World	9848	Visit 1	0	5840	VISIT_1	Visit 1	3	0	49187	Skin area visit 1	0	2020-02-05	132934	0	2020-02-05 13:49:02	2020-05-26 09:57:30	2020-07-17 12:55:38	DE003	Once a week	4	1	Yes	1	Mild	2	Yes	1	Mild	2	No	0			No	0	No	0	No	0
16	CP288	86	Prod	1171	82	1001	25	NO001	NO001	World	11410	Visit 1	0	7017	VISIT_1	Visit 1	3	0	52528	Skin area visit 1	0	2020-01-22	137617	0	2020-01-22 14:09:39	2020-07-07 16:40:08	2020-07-17 12:55:38	NO001	Every 2-3 days	2	4	Yes	1	Moderate	3	Yes	1	Moderate	3	No	0			No	0	No	0	No	0
16	CP288	86	Prod	1172	82	1002	25	NO001	NO001	World	11441	Visit 1	0	7017	VISIT_1	Visit 1	3	0	52588	Skin area visit 1	0	2020-01-23	137728	0	2020-01-23 12:53:11	2020-07-07 16:40:39	2020-07-17 12:55:38	NO001	Every 4-6 days	3	2	No	0			No	0			No	0			No	0	No	0	No	0
16	CP288	86	Prod	1173	82	1003	25	NO001	NO001	World	11472	Visit 1	0	7017	VISIT_1	Visit 1	3	0	52648	Skin area visit 1	0	2020-02-03	137777	0	2020-02-03 18:09:38	2020-07-07 16:41:10	2020-07-17 12:55:38	NO001	Every 4-6 days	3	0	No	0			No	0			No	0			No	0	No	0	No	0
16	CP288	86	Prod	1174	82	1004	25	NO001	NO001	World	11503	Visit 1	0	7017	VISIT_1	Visit 1	3	0	52708	Skin area visit 1	0	2020-02-04	137857	0	2020-02-04 16:58:04	2020-07-07 16:41:41	2020-07-17 12:55:38	NO001	Every 2-3 days	2	1	Yes	1	Mild	2	Yes	1	Mild	2	Yes	1	Mild	2	No	0	No	0	Yes	1
16	CP288	86	Prod	1175	82	1005	25	NO001	NO001	World	11534	Visit 1	0	7017	VISIT_1	Visit 1	3	0	52768	Skin area visit 1	0	2020-02-05	137937	0	2020-02-05 13:59:59	2020-07-07 16:42:32	2020-07-17 12:55:38	NO001	Once a week	4	0	Yes	1	Very mild	1	Yes	1	Very mild	1	No	0			No	0	No	0	No	0
16	CP288	86	Prod	1176	82	1006	25	NO001	NO001	World	11565	Visit 1	0	7017	VISIT_1	Visit 1	3	0	52828	Skin area visit 1	0	2020-02-11	138048	0	2020-02-11 12:42:37	2020-07-07 16:43:02	2020-07-17 12:55:38	NO001	Daily	1	1	Yes	1	Mild	2	Yes	1	Mild	2	No	0			No	0	No	0	No	0
16	CP288	86	Prod	1177	82	1007	25	NO001	NO001	World	11596	Visit 1	0	7017	VISIT_1	Visit 1	3	0	52888	Skin area visit 1	0	2020-02-20	138097	0	2020-02-20 09:14:58	2020-07-07 16:43:43	2020-07-17 12:55:38	NO001	Every 2-3 days	2	0	Yes	1	Mild	2	Yes	1	Mild	2	No	0			No	0	No	0	No	0
16	CP288	86	Prod	1178	82	1008	25	NO001	NO001	World	11627	Visit 1	0	7017	VISIT_1	Visit 1	3	0	52948	Skin area visit 1	0	2020-02-28	138208	0	2020-02-28 08:54:55	2020-07-07 16:44:14	2020-07-17 12:55:38	NO001	Once a week	4	0	Yes	1	Very mild	1	Yes	1	Very mild	1	No	0			No	0	No	0	No	0
16	CP288	86	Prod	1179	82	1009	25	NO001	NO001	World	11658	Visit 1	0	7017	VISIT_1	Visit 1	3	0	53008	Skin area visit 1	0	2020-02-28	138257	0	2020-02-28 12:39:28	2020-07-07 16:44:35	2020-07-17 12:55:38	NO001	Every 4-6 days	3	0	Yes	1	Very mild	1	Yes	1	Very mild	1	No	0			No	0	No	0	No	0
16	CP288	86	Prod	1180	82	1010	25	NO001	NO001	World	11689	Visit 1	0	7017	VISIT_1	Visit 1	3	0	53068	Skin area visit 1	0	2020-03-03	138368	0	2020-03-03 09:42:07	2020-07-07 16:45:16	2020-07-17 12:55:38	NO001	Every 2-3 days	2	2	Yes	1	Very mild	1	Yes	1	Very mild	1	No	0			No	0	No	0	No	0
16	CP288	86	Prod	1183	93	5001	29	Fondazione Poliambulanza Istituto Ospedaliero	IT001	World	11746	Visit 1	0	7017	VISIT_1	Visit 1	3	0	53306	Skin area visit 1	0	2020-02-11	138727	0	2020-02-12 13:38:45	2020-07-16 18:39:49	2020-07-17 12:55:38	IT001	Every second week	5	4	Yes	1	Mild	2	Yes	1	Very mild	1	No	0			No	0	No	0	No	0
16	CP288	86	Prod	1184	93	5002	29	Fondazione Poliambulanza Istituto Ospedaliero	IT001	World	11777	Visit 1	0	7017	VISIT_1	Visit 1	3	0	53366	Skin area visit 1	0	2020-02-26	138807	0	2020-02-27 11:21:50	2020-07-16 18:40:00	2020-07-17 12:55:38	IT001	Once a week	4	10	Yes	1	Moderate	3	Yes	1	Moderate	3	Yes	1	Moderate	3	Yes	1	No	0	No	0
16	CP288	86	Prod	1188	80	2076	24	Sanitätshaus Fürst GmbH	DE003	World	11901	Visit 1	0	7017	VISIT_1	Visit 1	3	0	53606	Skin area visit 1	0	2020-02-07	139127	0	2020-02-07 09:47:10	2020-07-06 18:28:07	2020-07-17 12:55:38	DE003	Once a week	4	2	Yes	1	Very mild	1	No	0			No	0			No	0	No	0	No	0
16	CP288	86	Prod	1189	80	2077	24	Sanitätshaus Fürst GmbH	DE003	World	11932	Visit 1	0	7017	VISIT_1	Visit 1	3	0	53666	Skin area visit 1	0	2020-02-10	139207	0	2020-02-10 10:13:08	2020-07-06 18:28:17	2020-07-17 12:55:38	DE003	Daily	1	-	Yes	1	Very mild	1	Yes	1	Moderate	3	No	0			No	0	No	0	No	0
16	CP288	86	Prod	1190	80	2078	24	Sanitätshaus Fürst GmbH	DE003	World	11963	Visit 1	0	7017	VISIT_1	Visit 1	3	0	53726	Skin area visit 1	0	2020-02-11	139287	0	2020-02-11 11:05:43	2020-07-03 13:25:54	2020-07-17 12:55:38	DE003	Daily	1	0	Yes	1	Severe	4	Yes	1	Severe	4	Yes	1	Severe	4	Yes	1	Yes	1	Yes	1
16	CP288	86	Prod	1191	80	2079	24	Sanitätshaus Fürst GmbH	DE003	World	11994	Visit 1	0	7017	VISIT_1	Visit 1	3	0	53786	Skin area visit 1	0	2020-02-16	139367	0	2020-02-16 10:43:37	2020-07-06 17:35:17	2020-07-17 12:55:38	DE003	Once a week	4	8	No	0			No	0			No	0			No	0	No	0	No	0
16	CP288	86	Prod	1192	80	2080	24	Sanitätshaus Fürst GmbH	DE003	World	12025	Visit 1	0	7017	VISIT_1	Visit 1	3	0	53846	Skin area visit 1	0	2020-02-16	139447	0	2020-02-16 15:01:07	2020-07-06 17:35:43	2020-07-17 12:55:38	DE003	Every 2-3 days	2	0	No	0			No	0			No	0			No	0	No	0	No	0
16	CP288	86	Prod	1279	80	2081	24	Sanitätshaus Fürst GmbH	DE003	World	14100	Visit 1	0	7017	VISIT_1	Visit 1	3	0	58421	Skin area visit 1	0	2020-02-25	146190	0	2020-02-25 09:54:54	2020-06-16 08:47:33	2020-07-17 12:55:38	DE003	Once a week	4	1	Yes	1	Mild	2	Yes	1	Mild	2	No	0			Yes	1	Yes	1	No	0
16	CP288	86	Prod	1280	80	2082	24	Sanitätshaus Fürst GmbH	DE003	World	14157	Visit 1	0	7017	VISIT_1	Visit 1	3	0	58481	Skin area visit 1	0	2020-02-26	146270	0	2020-02-26 10:01:24	2020-07-03 13:29:07	2020-07-17 12:55:38	DE003	Daily	1	0	Yes	1	Severe	4	Yes	1	Very severe	5	No	0	Severe	4	Yes	1	No	0	No	0
16	CP288	86	Prod	1281	80	2083	24	Sanitätshaus Fürst GmbH	DE003	World	14188	Visit 1	0	7017	VISIT_1	Visit 1	3	0	58541	Skin area visit 1	0	2020-02-26	146350	0	2020-02-26 15:34:18	2020-07-03 13:29:48	2020-07-17 12:55:38	DE003	Daily	1	0	Yes	1	Severe	4	Yes	1	Very mild	1	Yes	1	Severe	4	Yes	1	Yes	1	No	0
16	CP288	86	Prod	1287	83	6001	26	Illingworth Research Group	UK001	World	14300	Visit 1	0	7146	VISIT_1	Visit 1	3	0	58909	Skin area visit 1	0	2020-04-05	147056	0	2020-04-05 13:22:02	2020-07-15 08:20:37	2020-07-17 12:55:38	UK001	Every second week	5	0	Yes	1	Mild	2	Yes	1	Mild	2	Yes	1	Very mild	1	No	0	Yes	1	No	0
16	CP288	86	Prod	1288	83	6002	26	Illingworth Research Group	UK001	World	14331	Visit 1	0	7146	VISIT_1	Visit 1	3	0	58969	Skin area visit 1	0	2020-04-05	147136	0	2020-04-05 10:28:56	2020-07-15 08:21:19	2020-07-17 12:55:38	UK001	Every 2-3 days	2	0	Yes	1	Mild	2	No	0			No	0			No	0	No	0	Yes	1
16	CP288	86	Prod	1289	83	6003	26	Illingworth Research Group	UK001	World	14362	Visit 1	0	7146	VISIT_1	Visit 1	3	0	59029	Skin area visit 1	0	2020-04-03	147216	0	2020-04-03 15:29:47	2020-07-15 08:23:50	2020-07-17 12:55:38	UK001	Every 4-6 days	3	0	Yes	1	Mild	2	No	0			No	0			No	0	No	0	No	0
16	CP288	86	Prod	1290	83	6004	26	Illingworth Research Group	UK001	World	14393	Visit 1	0	7146	VISIT_1	Visit 1	3	0	59089	Skin area visit 1	0	2020-04-04	147296	0	2020-04-04 10:01:18	2020-07-15 08:24:21	2020-07-17 12:55:38	UK001	Every second week	5	0	Yes	1	Very mild	1	Yes	1	Very mild	1	No	0			No	0	Yes	1	No	0
16	CP288	86	Prod	1291	83	6005	26	Illingworth Research Group	UK001	World	14424	Visit 1	0	7146	VISIT_1	Visit 1	3	0	59149	Skin area visit 1	0	2020-04-05	147327	0	2020-04-05 15:47:14	2020-07-15 08:24:53	2020-07-17 12:55:38	UK001	Every 2-3 days	2	1	Yes	1	Moderate	3	Yes	1	Severe	4	Yes	1	Moderate	3	Yes	1	Yes	1	No	0
16	CP288	86	Prod	1292	83	6006	26	Illingworth Research Group	UK001	World	14455	Visit 1	0	7146	VISIT_1	Visit 1	3	0	59209	Skin area visit 1	0	2020-04-08	147456	0	2020-04-08 15:03:50	2020-07-15 08:25:24	2020-07-17 12:55:38	UK001	Every 2-3 days	2	0	Yes	1	Moderate	3	Yes	1	Mild	2	No	0			Yes	1	No	0	No	0
16	CP288	86	Prod	1293	83	6007	26	Illingworth Research Group	UK001	World	14486	Visit 1	0	7146	VISIT_1	Visit 1	3	0	59269	Skin area visit 1	0	2020-04-04	147536	0	2020-04-04 12:37:25	2020-07-15 08:25:56	2020-07-17 12:55:38	UK001	Every 2-3 days	2	5	Yes	1	Mild	2	Yes	1	Mild	2	No	0			Yes	1	No	0	No	0
16	CP288	86	Prod	1294	83	6008	26	Illingworth Research Group	UK001	World	14517	Visit 1	0	7146	VISIT_1	Visit 1	3	0	59329	Skin area visit 1	0	2020-04-06	147567	0	2020-04-06 08:38:12	2020-07-15 08:26:17	2020-07-17 12:55:38	UK001	Daily	1	1	Yes	1	Very mild	1	Yes	1	Very mild	1	No	0			No	0	No	0	No	0
16	CP288	86	Prod	1295	83	6009	26	Illingworth Research Group	UK001	World	14548	Visit 1	0	7146	VISIT_1	Visit 1	3	0	59389	Skin area visit 1	0	2020-04-05	147647	0	2020-04-05 19:56:01	2020-07-15 08:26:48	2020-07-17 12:55:38	UK001	Daily	1	1	Yes	1	Mild	2	Yes	1	Mild	2	No	0			No	0	No	0	No	0
16	CP288	86	Prod	1296	83	6010	26	Illingworth Research Group	UK001	World	14579	Visit 1	0	7146	VISIT_1	Visit 1	3	0	59449	Skin area visit 1	0	2020-04-05	147776	0	2020-04-05 11:54:41	2020-07-15 08:27:10	2020-07-17 12:55:38	UK001	Every 2-3 days	2	0	Yes	1	Mild	2	Yes	1	Mild	2	No	0			No	0	No	0	No	0
16	CP288	86	Prod	1297	83	6011	26	Illingworth Research Group	UK001	World	14610	Visit 1	0	7146	VISIT_1	Visit 1	3	0	59509	Skin area visit 1	0	2020-04-07	147807	0	2020-04-07 11:15:08	2020-07-15 08:27:41	2020-07-17 12:55:38	UK001	Every 2-3 days	2	0	Yes	1	Mild	2	Yes	1	Mild	2	No	0			No	0	No	0	No	0
16	CP288	86	Prod	1298	83	6012	26	Illingworth Research Group	UK001	World	14641	Visit 1	0	7146	VISIT_1	Visit 1	3	0	59569	Skin area visit 1	0	2020-04-04	147936	0	2020-04-04 08:23:29	2020-07-15 08:28:33	2020-07-17 12:55:38	UK001	Once a week	4	0	No	0			No	0			No	0			No	0	Yes	1	No	0
16	CP288	86	Prod	1299	83	6013	26	Illingworth Research Group	UK001	World	14672	Visit 1	0	7146	VISIT_1	Visit 1	3	0	59629	Skin area visit 1	0	2020-04-08	147967	0	2020-04-08 09:20:31	2020-07-15 08:28:54	2020-07-17 12:55:38	UK001	Every 4-6 days	3	0	Yes	1	Mild	2	Yes	1	Mild	2	No	0			No	0	No	0	No	0
16	CP288	86	Prod	1300	83	6014	26	Illingworth Research Group	UK001	World	14703	Visit 1	0	7146	VISIT_1	Visit 1	3	0	59689	Skin area visit 1	0	2020-04-08	148047	0	2020-04-08 10:26:52	2020-07-15 08:29:25	2020-07-17 12:55:38	UK001	Daily	1	0	Yes	1	Moderate	3	Yes	1	Moderate	3	Yes	1	Moderate	3	Yes	1	Yes	1	Yes	1
16	CP288	86	Prod	1301	83	6015	26	Illingworth Research Group	UK001	World	14734	Visit 1	0	7146	VISIT_1	Visit 1	3	0	59749	Skin area visit 1	0	2020-04-07	148176	0	2020-04-07 14:58:38	2020-07-15 08:29:56	2020-07-17 12:55:38	UK001	Once a week	4	0	Yes	1	Mild	2	Yes	1	Mild	2	No	0			No	0	No	0	No	0
16	CP288	86	Prod	1302	83	6016	26	Illingworth Research Group	UK001	World	14765	Visit 1	0	7146	VISIT_1	Visit 1	3	0	59809	Skin area visit 1	0	2020-04-08	148256	0	2020-04-08 12:01:32	2020-07-15 08:30:27	2020-07-17 12:55:38	UK001	Every 2-3 days	2	0	No	0			No	0			No	0			No	0	No	0	No	0
16	CP288	86	Prod	1304	83	6018	26	Illingworth Research Group	UK001	World	14827	Visit 1	0	7146	VISIT_1	Visit 1	3	0	59929	Skin area visit 1	0	2020-04-09	148416	0	2020-04-09 08:49:50	2020-07-15 08:31:29	2020-07-17 12:55:38	UK001	Every 2-3 days	2	0	Yes	1	Mild	2	Yes	1	Mild	2	No	0			No	0	No	0	No	0
16	CP288	86	Prod	1305	83	6019	26	Illingworth Research Group	UK001	World	14858	Visit 1	0	7146	VISIT_1	Visit 1	3	0	59989	Skin area visit 1	0	2020-04-09	148447	0	2020-04-09 11:24:52	2020-07-15 08:32:00	2020-07-17 12:55:38	UK001	Every 2-3 days	2	2	Yes	1	Moderate	3	No	0			Yes	1	Severe	4	No	0	Yes	1	Yes	1
16	CP288	86	Prod	1306	83	6020	26	Illingworth Research Group	UK001	World	14889	Visit 1	0	7146	VISIT_1	Visit 1	3	0	60049	Skin area visit 1	0	2020-04-09	148527	0	2020-04-09 13:27:27	2020-07-15 08:32:32	2020-07-17 12:55:38	UK001	Daily	1	2	Yes	1	Moderate	3	Yes	1	Moderate	3	No	0			Yes	1	No	0	No	0
16	CP288	86	Prod	1307	83	6021	26	Illingworth Research Group	UK001	World	14920	Visit 1	0	7146	VISIT_1	Visit 1	3	0	60109	Skin area visit 1	0	2020-04-09	148656	0	2020-04-09 12:36:04	2020-07-15 08:33:03	2020-07-17 12:55:38	UK001	Once a week	4	0	No	0			No	0			No	0			No	0	No	0	No	0
16	CP288	86	Prod	1308	83	6022	26	Illingworth Research Group	UK001	World	14951	Visit 1	0	7146	VISIT_1	Visit 1	3	0	60169	Skin area visit 1	0	2020-04-15	148687	0	2020-04-15 12:22:26	2020-07-15 08:33:34	2020-07-17 12:55:38	UK001	Every 2-3 days	2	0	Yes	1	Mild	2	No	0			No	0			No	0	No	0	No	0
16	CP288	86	Prod	1309	83	6023	26	Illingworth Research Group	UK001	World	14982	Visit 1	0	7146	VISIT_1	Visit 1	3	0	60229	Skin area visit 1	0	2020-04-17	148816	0	2020-04-17 09:05:40	2020-07-15 08:34:05	2020-07-17 12:55:38	UK001	Daily	1	0	Yes	1	Mild	2	Yes	1	Mild	2	Yes	1			No	0	Yes	1	Yes	1
16	CP288	86	Prod	1310	83	6024	26	Illingworth Research Group	UK001	World	15013	Visit 1	0	7146	VISIT_1	Visit 1	3	0	60289	Skin area visit 1	0	2020-04-17	148896	0	2020-04-17 14:22:34	2020-07-15 08:34:36	2020-07-17 12:55:38	UK001	Once a week	4	0	Yes	1	Mild	2	Yes	1	Very mild	1	No	0			Yes	1	No	0	No	0
16	CP288	86	Prod	1311	83	6025	26	Illingworth Research Group	UK001	World	15044	Visit 1	0	7146	VISIT_1	Visit 1	3	0	60349	Skin area visit 1	0	2020-04-19	148927	0	2020-04-19 15:27:06	2020-07-15 08:35:07	2020-07-17 12:55:38	UK001	Every 4-6 days	3	1	Yes	1	Moderate	3	Yes	1	Moderate	3	No	0			Yes	1	No	0	No	0
16	CP288	86	Prod	1340	78	2016	22	Universitätsklinikum Schleswig-Holstein	DE001	World	15655	Visit 1	0	7270	VISIT_1	Visit 1	3	0	62223	Skin area visit 1	0	2020-02-25	151650	0	2020-02-25 11:49:17	2020-07-16 15:54:41	2020-07-17 12:55:38	DE001	Every 2-3 days	2	NO	No	0			No	0			No	0			No	0	No	0	No	0
16	CP288	86	Prod	1341	78	2017	22	Universitätsklinikum Schleswig-Holstein	DE001	World	15686	Visit 1	0	7270	VISIT_1	Visit 1	3	0	62283	Skin area visit 1	0	2020-02-25	151730	0	2020-02-25 13:17:28	2020-07-16 15:56:03	2020-07-17 12:55:38	DE001	Every 2-3 days	2	NO	No	0			No	0			No	0			No	0	No	0	No	0
16	CP288	86	Prod	1342	78	2018	22	Universitätsklinikum Schleswig-Holstein	DE001	World	15717	Visit 1	0	7270	VISIT_1	Visit 1	3	0	62343	Skin area visit 1	0	2020-02-25	151761	0	2020-02-25 15:35:02	2020-07-16 15:58:24	2020-07-17 12:55:38	DE001	Every second week	5	NO	No	0			No	0			No	0			No	0	No	0	No	0
16	CP288	86	Prod	1343	78	2019	22	Universitätsklinikum Schleswig-Holstein	DE001	World	15748	Visit 1	0	7270	VISIT_1	Visit 1	3	0	62403	Skin area visit 1	0	2020-02-26	151841	0	2020-02-26 11:47:36	2020-07-16 16:00:05	2020-07-17 12:55:38	DE001	Daily	1	5	Yes	1	Moderate	3	Yes	1	Moderate	3	Yes	1	Moderate	3	Yes	1	Yes	1	Yes	1
16	CP288	86	Prod	1344	78	2020	22	Universitätsklinikum Schleswig-Holstein	DE001	World	15779	Visit 1	0	7270	VISIT_1	Visit 1	3	0	62463	Skin area visit 1	0	2020-02-26	151970	0	2020-02-26 17:45:59	2020-07-16 16:01:17	2020-07-17 12:55:38	DE001	Daily	1	1	No	0			No	0			No	0			No	0	No	0	No	0
16	CP288	86	Prod	1345	82	1016	25	NO001	NO001	World	15810	Visit 1	0	7270	VISIT_1	Visit 1	3	0	62523	Skin area visit 1	0	2020-03-03	152050	0	2020-03-03 15:35:54	2020-05-06 19:47:02	2020-07-17 12:55:38	NO001	Once a week	4	0	Yes	1	Very mild	1	Yes	1	Very mild	1	No	0			No	0	No	0	No	0
16	CP288	86	Prod	1346	82	1017	25	NO001	NO001	World	15841	Visit 1	0	7270	VISIT_1	Visit 1	3	0	62583	Skin area visit 1	0	2020-03-04	152130	0	2020-03-04 12:00:14	2020-07-07 16:45:57	2020-07-17 12:55:38	NO001	Daily	1	1	Yes	1	Mild	2	Yes	1	Very mild	1	No	0			Yes	1	No	0	Yes	1
16	CP288	86	Prod	1347	82	1018	25	NO001	NO001	World	15872	Visit 1	0	7270	VISIT_1	Visit 1	3	0	62643	Skin area visit 1	0	2020-03-04	152210	0	2020-03-04 15:45:03	2020-07-07 16:46:28	2020-07-17 12:55:38	NO001	Once a week	4	1	Yes	1	Very mild	1	No	0			No	0	Very mild	1	No	0	No	0	No	0
16	CP288	86	Prod	1348	82	1019	25	NO001	NO001	World	15903	Visit 1	0	7270	VISIT_1	Visit 1	3	0	62703	Skin area visit 1	0	2020-03-09	152290	0	2020-03-09 09:33:47	2020-05-06 19:52:52	2020-07-17 12:55:38	NO001	Once a week	4	0	Yes	1	Very mild	1	Yes	1	Very mild	1	No	0			Yes	1	No	0	No	0
16	CP288	86	Prod	1349	82	1020	25	NO001	NO001	World	15934	Visit 1	0	7270	VISIT_1	Visit 1	3	0	62763	Skin area visit 1	0	2020-03-09	152370	0	2020-03-09 15:37:39	2020-05-06 20:01:30	2020-07-17 12:55:38	NO001	Every 2-3 days	2	0	Yes	1	Very mild	1	Yes	1	Very mild	1	No	0			Yes	1	No	0	Yes	1
16	CP288	86	Prod	1358	78	2021	22	Universitätsklinikum Schleswig-Holstein	DE001	World	16068	Visit 1	0	7270	VISIT_1	Visit 1	3	0	63535	Skin area visit 1	0	2020-03-09	153904	0	2020-03-09 10:24:10	2020-07-16 16:02:38	2020-07-17 12:55:38	DE001	Once a week	4	0	No	0			No	0			No	0			No	0	No	0	No	0
16	CP288	86	Prod	1361	80	2084	24	Sanitätshaus Fürst GmbH	DE003	World	16161	Visit 1	0	7270	VISIT_1	Visit 1	3	0	63715	Skin area visit 1	0	2020-02-27	154144	0	2020-02-27 16:28:15	2020-07-03 13:30:39	2020-07-17 12:55:38	DE003	Every 2-3 days	2	1	Yes	1	Mild	2	Yes	1	Severe	4	Yes	1	Severe	4	Yes	1	Yes	1	No	0
16	CP288	86	Prod	1362	80	2085	24	Sanitätshaus Fürst GmbH	DE003	World	16192	Visit 1	0	7270	VISIT_1	Visit 1	3	0	63775	Skin area visit 1	0	2020-03-17	154224	0	2020-03-17 17:03:50	2020-07-03 13:31:20	2020-07-17 12:55:38	DE003	Every 2-3 days	2	6	Yes	1	Moderate	3	Yes	1	Moderate	3	No	0			No	0	No	0	No	0
[truncated: 18 more columns]
