# Supplementary material for: Psychometric validation of the Ostomy Skin Tool 2.0
Source: PeerJ. 2023 Dec 18;11:e16685. doi: 10.7717/peerj.16685 (PMC10734405; doi:10.7717/peerj.16685)
Supplement: Supplemental Information 6 [file peerj-11-16685-s006.xlsx]

## Sheet: skin_area_2
projectid	project	studyid	environmentName	subjectId	StudySiteId	Subject	siteid	Site	SiteNumber	SiteGroup	instanceId	InstanceName	InstanceRepeatNumber	folderid	Folder	FolderName	FolderSeq	TargetDays	DataPageId	DataPageName	PageRepeatNumber	RecordDate	RecordId	RecordPosition	MinCreated	MaxUpdated	SaveTS	StudyEnvSiteNumber	COMPLICATION_YN	COMPLICATION_YN_STD	COMPLICATION_IF_YES	COMPLICATION_IF_YES_STD	DISCOLOUR_YN	DISCOLOUR_YN_STD	DISCOLOUR_IF_YES	DISCOLOUR_IF_YES_STD	EROSION_YN	EROSION_YN_STD	EROSION_IF_YES	EROSION_IF_YES_STD	DISCOLOUR_COMP_YN	DISCOLOUR_COMP_YN_STD	EROSION_COMP_YN	EROSION_COMP_YN_STD	TISSUE_COMP_YN	TISSUE_COMP_YN_STD	COMPARE_SKIN	COMPARE_SKIN_STD	COMPARE_DISCOLOUR
16	CP288	86	Prod	1093	78	2001	22	Universitätsklinikum Schleswig-Holstein	DE001	World	9106	Visit 2	0	5842	VISIT_2	Visit 2	6	42	47765	Skin area visit 2	0	2020-03-11	131046	0	2020-03-11 12:07:59	2020-07-16 15:41:48	2020-07-17 12:55:40	DE001	Yes	1	Moderate	3	No	0			Yes	1	Severe	4	Yes	1	No	0	No	0	A little improved	3	A little improved
16	CP288	86	Prod	1094	78	2002	22	Universitätsklinikum Schleswig-Holstein	DE001	World	9137	Visit 2	0	5842	VISIT_2	Visit 2	6	42	47825	Skin area visit 2	0		131126	0	2020-03-25 09:06:33	2020-07-16 15:43:59	2020-07-17 12:55:40	DE001
16	CP288	86	Prod	1095	78	2003	22	Universitätsklinikum Schleswig-Holstein	DE001	World	9168	Visit 2	0	5842	VISIT_2	Visit 2	6	42	47885	Skin area visit 2	0	2020-03-20	131206	0	2020-03-20 09:14:22	2020-07-16 15:45:30	2020-07-17 12:55:40	DE001	No	0			No	0			No	0			No	0	No	0	No	0	No change	4	No change
16	CP288	86	Prod	1096	78	2004	22	Universitätsklinikum Schleswig-Holstein	DE001	World	9199	Visit 2	0	5842	VISIT_2	Visit 2	6	42	47945	Skin area visit 2	0	2020-03-20	131286	0	2020-03-20 09:27:26	2020-07-16 15:46:41	2020-07-17 12:55:40	DE001	No	0			No	0			No	0			No	0	No	0	No	0	No change	4	No change
16	CP288	86	Prod	1097	78	2005	22	Universitätsklinikum Schleswig-Holstein	DE001	World	9230	Visit 2	0	5842	VISIT_2	Visit 2	6	42	48005	Skin area visit 2	0	2020-03-20	131397	0	2020-03-20 09:31:12	2020-07-16 15:47:34	2020-07-17 12:55:40	DE001	No	0			No	0			No	0			No	0	No	0	No	0	No change	4	No change
16	CP288	86	Prod	1098	78	2006	22	Universitätsklinikum Schleswig-Holstein	DE001	World	9261	Visit 2	0	5842	VISIT_2	Visit 2	6	42	48065	Skin area visit 2	0		131446	0	2020-03-30 08:49:04	2020-07-16 15:49:25	2020-07-17 12:55:40	DE001
16	CP288	86	Prod	1099	78	2007	22	Universitätsklinikum Schleswig-Holstein	DE001	World	9292	Visit 2	0	5842	VISIT_2	Visit 2	6	42	48125	Skin area visit 2	0	2020-03-25	131557	0	2020-03-27 07:30:07	2020-07-16 15:50:27	2020-07-17 12:55:40	DE001	No	0			No	0			No	0			No	0	No	0	No	0	No change	4	No change
16	CP288	86	Prod	1100	78	2008	22	Universitätsklinikum Schleswig-Holstein	DE001	World	9323	Visit 2	0	5842	VISIT_2	Visit 2	6	42	48185	Skin area visit 2	0	2020-03-28	131606	0	2020-03-30 08:14:46	2020-07-16 15:51:28	2020-07-17 12:55:40	DE001	No	0			No	0			No	0			No	0	No	0	No	0	No change	4	No change
16	CP288	86	Prod	1101	78	2009	22	Universitätsklinikum Schleswig-Holstein	DE001	World	9354	Visit 2	0	5842	VISIT_2	Visit 2	6	42	48245	Skin area visit 2	0	2020-03-30	131686	0	2020-03-30 09:56:08	2020-07-16 15:52:39	2020-07-17 12:55:40	DE001	No	0			No	0			No	0			No	0	No	0	No	0	No change	4	No change
16	CP288	86	Prod	1102	78	2010	22	Universitätsklinikum Schleswig-Holstein	DE001	World	9385	Visit 2	0	5842	VISIT_2	Visit 2	6	42	48305	Skin area visit 2	0	2020-03-30	131766	0	2020-03-30 08:38:16	2020-07-16 15:54:00	2020-07-17 12:55:40	DE001	No	0			No	0			No	0			No	0	No	0	No	0	No change	4	No change
16	CP288	86	Prod	1103	81	2041	23	Klinikum der Universitat Munchen- Grosshadern	DE002	World	9416	Visit 2	0	5842	VISIT_2	Visit 2	6	42	48365	Skin area visit 2	0	2020-03-05	131846	0	2020-03-05 08:32:08	2020-06-03 07:37:20	2020-07-17 12:55:40	DE002	No	0			No	0			No	0			No	0	No	0	Yes	1	A little improved	3	A little improved
16	CP288	86	Prod	1104	81	2042	23	Klinikum der Universitat Munchen- Grosshadern	DE002	World	9447	Visit 2	0	5842	VISIT_2	Visit 2	6	42	48425	Skin area visit 2	0	2020-03-05	131926	0	2020-03-05 09:21:58	2020-06-03 07:37:31	2020-07-17 12:55:40	DE002	Yes	1	Mild	2	Yes	1	Mild	2	Yes	1	Very mild	1	Yes	1	No	0	No	0	No change	4	No change
16	CP288	86	Prod	1105	81	2043	23	Klinikum der Universitat Munchen- Grosshadern	DE002	World	9478	Visit 2	0	5842	VISIT_2	Visit 2	6	42	48485	Skin area visit 2	0	2020-03-11	132037	0	2020-03-11 13:24:10	2020-06-03 07:37:42	2020-07-17 12:55:40	DE002	Yes	1	Moderate	3	Yes	1	Moderate	3	No	0			Yes	1	No	0	No	0	No change	4	No change
16	CP288	86	Prod	1106	81	2044	23	Klinikum der Universitat Munchen- Grosshadern	DE002	World	9509	Visit 2	0	5842	VISIT_2	Visit 2	6	42	48545	Skin area visit 2	0	2020-03-24	132086	0	2020-04-21 08:39:50	2020-06-03 07:37:53	2020-07-17 12:55:40	DE002	No	0			No	0			No	0			No	0	No	0	No	0	A little worse	5	A little worse
16	CP288	86	Prod	1107	81	2045	23	Klinikum der Universitat Munchen- Grosshadern	DE002	World	9540	Visit 2	0	5842	VISIT_2	Visit 2	6	42	48605	Skin area visit 2	0	2020-03-23	132166	0	2020-04-21 08:52:00	2020-07-14 08:57:45	2020-07-17 12:55:40	DE002	Yes	1	Mild	2	Yes	1	Moderate	3	No	0			No	0	No	0	No	0	A little improved	3	A little improved
16	CP288	86	Prod	1108	81	2046	23	Klinikum der Universitat Munchen- Grosshadern	DE002	World	9571	Visit 2	0	5842	VISIT_2	Visit 2	6	42	48665	Skin area visit 2	0	2020-04-01	132246	0	2020-04-01 10:29:46	2020-06-03 07:38:24	2020-07-17 12:55:40	DE002	No	0			No	0			No	0			No	0	No	0	No	0	No change	4	No change
16	CP288	86	Prod	1114	80	2072	24	Sanitätshaus Fürst GmbH	DE003	World	9757	Visit 2	0	5842	VISIT_2	Visit 2	6	42	49025	Skin area visit 2	0	2020-03-17	132726	0	2020-03-17 12:21:40	2020-05-26 09:54:57	2020-07-17 12:55:40	DE003	No	0			No	0			No	0			No	0	No	0	No	0	Much improved	2	Much improved
16	CP288	86	Prod	1115	80	2073	24	Sanitätshaus Fürst GmbH	DE003	World	9788	Visit 2	0	5842	VISIT_2	Visit 2	6	42	49085	Skin area visit 2	0		132806	0	2020-03-18 09:07:34	2020-07-03 13:42:42	2020-07-17 12:55:40	DE003
16	CP288	86	Prod	1116	80	2074	24	Sanitätshaus Fürst GmbH	DE003	World	9819	Visit 2	0	5842	VISIT_2	Visit 2	6	42	49145	Skin area visit 2	0	2020-03-25	132886	0	2020-03-30 19:15:12	2020-05-26 09:56:59	2020-07-17 12:55:40	DE003	No	0			No	0			No	0			No	0	No	0	No	0	A little improved	3	A little improved
16	CP288	86	Prod	1171	82	1001	25	NO001	NO001	World	11411	Visit 2	0	7018	VISIT_2	Visit 2	6	42	52546	Skin area visit 2	0	2020-03-02	137649	0	2020-03-02 15:34:55	2020-07-07 16:40:18	2020-07-17 12:55:40	NO001	Yes	1	Mild	2	Yes	1	Mild	2	Yes	1	Mild	2	No	0	No	0	Yes	1	A little worse	5	No change
16	CP288	86	Prod	1173	82	1003	25	NO001	NO001	World	11473	Visit 2	0	7018	VISIT_2	Visit 2	6	42	52666	Skin area visit 2	0	2020-03-12	137809	0	2020-03-12 17:35:03	2020-07-07 16:41:20	2020-07-17 12:55:40	NO001	Yes	1	Very mild	1	Yes	1	Very mild	1	No	0			No	0	No	0	No	0	No change	4	No change
16	CP288	86	Prod	1174	82	1004	25	NO001	NO001	World	11504	Visit 2	0	7018	VISIT_2	Visit 2	6	42	52726	Skin area visit 2	0	2020-03-16	137889	0	2020-03-16 13:26:28	2020-07-07 16:41:51	2020-07-17 12:55:40	NO001	Yes	1	Mild	2	No	0			Yes	1	Mild	2	Yes	1	No	0	Yes	1	A little improved	3	No change
16	CP288	86	Prod	1175	82	1005	25	NO001	NO001	World	11535	Visit 2	0	7018	VISIT_2	Visit 2	6	42	52786	Skin area visit 2	0	2020-03-17	137969	0	2020-03-17 07:09:36	2020-05-06 19:11:25	2020-07-17 12:55:40	NO001	No	0			No	0			No	0			No	0	No	0	No	0	A little improved	3	A little improved
16	CP288	86	Prod	1176	82	1006	25	NO001	NO001	World	11566	Visit 2	0	7018	VISIT_2	Visit 2	6	42	52846	Skin area visit 2	0	2020-03-24	138080	0	2020-04-02 08:48:24	2020-05-06 19:19:48	2020-07-17 12:55:40	NO001	Yes	1	Mild	2	No	0			No	0			No	0	No	0	No	0	A little improved	3	A little improved
16	CP288	86	Prod	1177	82	1007	25	NO001	NO001	World	11597	Visit 2	0	7018	VISIT_2	Visit 2	6	42	52906	Skin area visit 2	0	2020-04-02	138129	0	2020-04-02 08:40:07	2020-05-06 19:28:15	2020-07-17 12:55:40	NO001	Yes	1	Very mild	1	Yes	1	Very mild	1	No	0			No	0	No	0	No	0	A little improved	3	A little improved
16	CP288	86	Prod	1178	82	1008	25	NO001	NO001	World	11628	Visit 2	0	7018	VISIT_2	Visit 2	6	42	52966	Skin area visit 2	0	2020-04-07	138240	0	2020-04-07 13:31:32	2020-07-07 16:44:14	2020-07-17 12:55:40	NO001	No	0			No	0			No	0			No	0	No	0	No	0	A little improved	3	A little improved
16	CP288	86	Prod	1179	82	1009	25	NO001	NO001	World	11659	Visit 2	0	7018	VISIT_2	Visit 2	6	42	53026	Skin area visit 2	0	2020-04-07	138289	0	2020-04-07 13:29:57	2020-05-06 19:41:40	2020-07-17 12:55:40	NO001	No	0			No	0			No	0			No	0	No	0	No	0	No change	4	No change
16	CP288	86	Prod	1183	93	5001	29	Fondazione Poliambulanza Istituto Ospedaliero	IT001	World	11747	Visit 2	0	7018	VISIT_2	Visit 2	6	42	53324	Skin area visit 2	0	2020-03-24	138759	0	2020-04-07 07:17:40	2020-07-16 18:39:49	2020-07-17 12:55:40	IT001	No	0			No	0			No	0			No	0	No	0	No	0	Much improved	2	No change
16	CP288	86	Prod	1184	93	5002	29	Fondazione Poliambulanza Istituto Ospedaliero	IT001	World	11778	Visit 2	0	7018	VISIT_2	Visit 2	6	42	53384	Skin area visit 2	0	2020-04-08	138839	0	2020-04-08 12:13:04	2020-07-16 18:40:10	2020-07-17 12:55:40	IT001	No	0			No	0			No	0			No	0	Yes	1	No	0	No change	4	No change
16	CP288	86	Prod	1188	80	2076	24	Sanitätshaus Fürst GmbH	DE003	World	11902	Visit 2	0	7018	VISIT_2	Visit 2	6	42	53624	Skin area visit 2	0	2020-03-20	139159	0	2020-03-20 09:24:46	2020-05-26 09:58:11	2020-07-17 12:55:40	DE003	No	0			No	0			No	0			No	0	No	0	No	0	A little improved	3	A little improved
16	CP288	86	Prod	1189	80	2077	24	Sanitätshaus Fürst GmbH	DE003	World	11933	Visit 2	0	7018	VISIT_2	Visit 2	6	42	53684	Skin area visit 2	0	2020-03-23	139239	0	2020-03-29 09:03:54	2020-07-03 13:25:13	2020-07-17 12:55:40	DE003	No	0			No	0			No	0			No	0	No	0	No	0	No change	4	No change
16	CP288	86	Prod	1190	80	2078	24	Sanitätshaus Fürst GmbH	DE003	World	11964	Visit 2	0	7018	VISIT_2	Visit 2	6	42	53744	Skin area visit 2	0	2020-03-24	139319	0	2020-03-29 09:08:02	2020-07-03 13:25:54	2020-07-17 12:55:40	DE003	Yes	1	Moderate	3	Yes	1	Moderate	3	Yes	1	Severe	4	Yes	1	No	0	Yes	1	Much improved	2	Much improved
16	CP288	86	Prod	1191	80	2079	24	Sanitätshaus Fürst GmbH	DE003	World	11995	Visit 2	0	7018	VISIT_2	Visit 2	6	42	53804	Skin area visit 2	0	2020-03-29	139399	0	2020-03-29 08:59:38	2020-07-03 13:27:05	2020-07-17 12:55:40	DE003	No	0			No	0			No	0			No	0	No	0	No	0	No change	4	No change
16	CP288	86	Prod	1192	80	2080	24	Sanitätshaus Fürst GmbH	DE003	World	12026	Visit 2	0	7018	VISIT_2	Visit 2	6	42	53864	Skin area visit 2	0	2020-03-30	139479	0	2020-03-30 18:09:16	2020-07-03 13:28:06	2020-07-17 12:55:40	DE003	No	0			No	0			No	0			No	0	No	0	No	0	No change	4	No change
16	CP288	86	Prod	1279	80	2081	24	Sanitätshaus Fürst GmbH	DE003	World	14099	Visit 2	0	7018	VISIT_2	Visit 2	6	42	58439	Skin area visit 2	0	2020-04-07	146222	0	2020-04-07 13:17:43	2020-05-26 09:58:42	2020-07-17 12:55:40	DE003	No	0			No	0			No	0			No	0	No	0	No	0	No change	4	No change
16	CP288	86	Prod	1280	80	2082	24	Sanitätshaus Fürst GmbH	DE003	World	14158	Visit 2	0	7018	VISIT_2	Visit 2	6	42	58499	Skin area visit 2	0	2020-04-07	146302	0	2020-04-07 16:49:15	2020-07-03 13:29:07	2020-07-17 12:55:40	DE003	Yes	1	Very severe	5	Yes	1	Very severe	5	Yes	1	Very severe	5	Yes	1	Yes	1	No	0	A little improved	3	A little improved
16	CP288	86	Prod	1281	80	2083	24	Sanitätshaus Fürst GmbH	DE003	World	14189	Visit 2	0	7018	VISIT_2	Visit 2	6	42	58559	Skin area visit 2	0	2020-04-10	146382	0	2020-04-10 07:28:43	2020-07-03 13:29:48	2020-07-17 12:55:40	DE003	Yes	1	Moderate	3	Yes	1	Mild	2	No	0			Yes	1	No	0	No	0	No change	4	No change
16	CP288	86	Prod	1287	83	6001	26	Illingworth Research Group	UK001	World	14301	Visit 2	0	7147	VISIT_2	Visit 2	6	42	58910	Skin area visit 2	0	2020-05-17	147057	0	2020-05-17 10:44:28	2020-07-15 08:20:37	2020-07-17 12:55:40	UK001	Yes	1	Mild	2	Yes	1	Mild	2	Yes	1	Mild	2	No	0	No	0	No	0	A little worse	5	A little worse
16	CP288	86	Prod	1288	83	6002	26	Illingworth Research Group	UK001	World	14332	Visit 2	0	7147	VISIT_2	Visit 2	6	42	58970	Skin area visit 2	0	2020-05-17	147137	0	2020-05-17 14:36:48	2020-07-15 08:21:19	2020-07-17 12:55:40	UK001	No	0			No	0			No	0			No	0	No	0	No	0	A little improved	3	A little improved
16	CP288	86	Prod	1289	83	6003	26	Illingworth Research Group	UK001	World	14363	Visit 2	0	7147	VISIT_2	Visit 2	6	42	59030	Skin area visit 2	0	2020-05-16	147217	0	2020-05-16 09:06:37	2020-07-15 08:23:50	2020-07-17 12:55:40	UK001	Yes	1	Mild	2	Yes	1	Mild	2	No	0			No	0	No	0	No	0	No change	4	No change
16	CP288	86	Prod	1290	83	6004	26	Illingworth Research Group	UK001	World	14394	Visit 2	0	7147	VISIT_2	Visit 2	6	42	59090	Skin area visit 2	0	2020-05-16	147297	0	2020-05-16 15:41:51	2020-07-15 08:24:21	2020-07-17 12:55:40	UK001	No	0			No	0			No	0			No	0	No	0	No	0	Much improved	2	Much improved
16	CP288	86	Prod	1292	83	6006	26	Illingworth Research Group	UK001	World	14456	Visit 2	0	7147	VISIT_2	Visit 2	6	42	59210	Skin area visit 2	0	2020-05-20	147457	0	2020-05-20 19:05:17	2020-07-15 08:25:24	2020-07-17 12:55:40	UK001	Yes	1	Moderate	3	Yes	1	Severe	4	No	0			Yes	1	No	0	No	0	No change	4	No change
16	CP288	86	Prod	1294	83	6008	26	Illingworth Research Group	UK001	World	14518	Visit 2	0	7147	VISIT_2	Visit 2	6	42	59330	Skin area visit 2	0	2020-05-18	147568	0	2020-05-18 14:59:05	2020-07-15 08:26:17	2020-07-17 12:55:40	UK001	No	0			No	0			No	0			No	0	No	0	No	0	No change	4	No change
16	CP288	86	Prod	1295	83	6009	26	Illingworth Research Group	UK001	World	14549	Visit 2	0	7147	VISIT_2	Visit 2	6	42	59390	Skin area visit 2	0	2020-05-17	147648	0	2020-05-17 19:06:24	2020-07-15 08:26:48	2020-07-17 12:55:40	UK001	Yes	1	Moderate	3	Yes	1	Moderate	3	Yes	1	Moderate	3	Yes	1	No	0	No	0	Much worse	6	Much worse
16	CP288	86	Prod	1296	83	6010	26	Illingworth Research Group	UK001	World	14580	Visit 2	0	7147	VISIT_2	Visit 2	6	42	59450	Skin area visit 2	0	2020-05-17	147777	0	2020-05-17 09:19:03	2020-07-15 08:27:10	2020-07-17 12:55:40	UK001	Yes	1	Moderate	3	Yes	1	Moderate	3	Yes	1	Mild	2	Yes	1	Yes	1	No	0	No change	4	No change
16	CP288	86	Prod	1297	83	6011	26	Illingworth Research Group	UK001	World	14611	Visit 2	0	7147	VISIT_2	Visit 2	6	42	59510	Skin area visit 2	0	2020-05-20	147808	0	2020-05-20 12:13:08	2020-07-15 08:27:41	2020-07-17 12:55:40	UK001	No	0			No	0			No	0			No	0	No	0	No	0	No change	4	No change
16	CP288	86	Prod	1298	83	6012	26	Illingworth Research Group	UK001	World	14642	Visit 2	0	7147	VISIT_2	Visit 2	6	42	59570	Skin area visit 2	0	2020-05-16	147937	0	2020-05-16 09:08:06	2020-07-15 08:28:33	2020-07-17 12:55:40	UK001	Yes	1	Mild	2	No	0			Yes	1	Mild	2	No	0	Yes	1	No	0	A little improved	3	Much improved
16	CP288	86	Prod	1299	83	6013	26	Illingworth Research Group	UK001	World	14673	Visit 2	0	7147	VISIT_2	Visit 2	6	42	59630	Skin area visit 2	0	2020-05-20	147968	0	2020-05-20 11:07:28	2020-07-15 08:28:54	2020-07-17 12:55:40	UK001	Yes	1	Very mild	1	Yes	1	Very mild	1	No	0			No	0	No	0	No	0	A little improved	3	A little improved
16	CP288	86	Prod	1300	83	6014	26	Illingworth Research Group	UK001	World	14704	Visit 2	0	7147	VISIT_2	Visit 2	6	42	59690	Skin area visit 2	0	2020-05-19	148048	0	2020-05-19 14:24:34	2020-07-15 08:29:25	2020-07-17 12:55:40	UK001	Yes	1	Moderate	3	Yes	1	Moderate	3	No	0			Yes	1	No	0	No	0	A little improved	3	No change
16	CP288	86	Prod	1302	83	6016	26	Illingworth Research Group	UK001	World	14766	Visit 2	0	7147	VISIT_2	Visit 2	6	42	59810	Skin area visit 2	0	2020-05-21	148257	0	2020-05-21 09:11:35	2020-07-15 08:30:27	2020-07-17 12:55:40	UK001	Yes	1	Mild	2	Yes	1	Moderate	3	No	0			Yes	1	No	0	No	0	A little improved	3	No change
16	CP288	86	Prod	1304	83	6018	26	Illingworth Research Group	UK001	World	14828	Visit 2	0	7147	VISIT_2	Visit 2	6	42	59930	Skin area visit 2	0	2020-05-21	148417	0	2020-05-21 13:41:25	2020-07-15 08:31:29	2020-07-17 12:55:40	UK001	No	0			No	0			No	0			No	0	No	0	No	0	No change	4	No change
16	CP288	86	Prod	1305	83	6019	26	Illingworth Research Group	UK001	World	14859	Visit 2	0	7147	VISIT_2	Visit 2	6	42	59990	Skin area visit 2	0	2020-05-21	148448	0	2020-05-21 12:50:55	2020-07-15 08:32:00	2020-07-17 12:55:40	UK001	No	0			No	0			No	0			No	0	No	0	No	0	No change	4	No change
16	CP288	86	Prod	1306	83	6020	26	Illingworth Research Group	UK001	World	14890	Visit 2	0	7147	VISIT_2	Visit 2	6	42	60050	Skin area visit 2	0	2020-05-21	148528	0	2020-05-21 14:34:27	2020-07-15 08:32:32	2020-07-17 12:55:40	UK001	Yes	1	Mild	2	Yes	1	Mild	2	Yes	1	Mild	2	Yes	1	No	0	No	0	No change	4	No change
16	CP288	86	Prod	1307	83	6021	26	Illingworth Research Group	UK001	World	14921	Visit 2	0	7147	VISIT_2	Visit 2	6	42	60110	Skin area visit 2	0	2020-05-21	148657	0	2020-05-21 15:12:20	2020-07-15 08:33:03	2020-07-17 12:55:40	UK001	No	0			No	0			No	0			Yes	1	No	0	No	0	No change	4	No change
16	CP288	86	Prod	1308	83	6022	26	Illingworth Research Group	UK001	World	14952	Visit 2	0	7147	VISIT_2	Visit 2	6	42	60170	Skin area visit 2	0	2020-05-28	148688	0	2020-05-28 14:45:34	2020-07-15 08:33:34	2020-07-17 12:55:40	UK001	Yes	1	Mild	2	No	0			No	0			No	0	Yes	1	Yes	1	A little worse	5	No change
16	CP288	86	Prod	1309	83	6023	26	Illingworth Research Group	UK001	World	14983	Visit 2	0	7147	VISIT_2	Visit 2	6	42	60230	Skin area visit 2	0	2020-05-27	148817	0	2020-05-27 12:46:23	2020-07-15 08:34:05	2020-07-17 12:55:40	UK001	Yes	1	Very mild	1	Yes	1	Very mild	1	No	0			No	0	No	0	No	0	A little worse	5	A little worse
16	CP288	86	Prod	1310	83	6024	26	Illingworth Research Group	UK001	World	15014	Visit 2	0	7147	VISIT_2	Visit 2	6	42	60290	Skin area visit 2	0	2020-05-28	148897	0	2020-05-28 10:28:21	2020-07-15 08:34:36	2020-07-17 12:55:40	UK001	Yes	1	Mild	2	Yes	1	Mild	2	No	0			No	0	No	0	No	0	A little improved	3	A little improved
16	CP288	86	Prod	1311	83	6025	26	Illingworth Research Group	UK001	World	15045	Visit 2	0	7147	VISIT_2	Visit 2	6	42	60350	Skin area visit 2	0	2020-05-27	148928	0	2020-05-27 18:28:42	2020-07-15 08:35:07	2020-07-17 12:55:40	UK001	Yes	1	Moderate	3	Yes	1	Moderate	3	Yes	1	Mild	2	Yes	1	Yes	1	No	0	No change	4	No change
16	CP288	86	Prod	1340	78	2016	22	Universitätsklinikum Schleswig-Holstein	DE001	World	15656	Visit 2	0	7271	VISIT_2	Visit 2	6	42	62224	Skin area visit 2	0	2020-04-07	151651	0	2020-04-07 16:54:30	2020-07-16 15:55:02	2020-07-17 12:55:40	DE001	No	0			No	0			No	0			No	0	No	0	No	0	No change	4	No change
16	CP288	86	Prod	1341	78	2017	22	Universitätsklinikum Schleswig-Holstein	DE001	World	15687	Visit 2	0	7271	VISIT_2	Visit 2	6	42	62284	Skin area visit 2	0	2020-04-07	151731	0	2020-04-07 17:31:16	2020-07-16 15:56:03	2020-07-17 12:55:40	DE001	No	0			No	0			No	0			No	0	No	0	No	0	No change	4	No change
16	CP288	86	Prod	1342	78	2018	22	Universitätsklinikum Schleswig-Holstein	DE001	World	15718	Visit 2	0	7271	VISIT_2	Visit 2	6	42	62344	Skin area visit 2	0	2020-04-07	151762	0	2020-04-07 17:35:05	2020-07-16 15:58:54	2020-07-17 12:55:40	DE001	Yes	1	Moderate	3	Yes	1	Moderate	3	No	0			Yes	1	No	0	No	0	Much worse	6	Much worse
16	CP288	86	Prod	1343	78	2019	22	Universitätsklinikum Schleswig-Holstein	DE001	World	15749	Visit 2	0	7271	VISIT_2	Visit 2	6	42	62404	Skin area visit 2	0	2020-04-09	151842	0	2020-04-09 17:38:26	2020-07-16 16:00:05	2020-07-17 12:55:40	DE001	Yes	1	Moderate	3	Yes	1	Mild	2	Yes	1	Mild	2	Yes	1	No	0	No	0	Much improved	2	Much improved
16	CP288	86	Prod	1344	78	2020	22	Universitätsklinikum Schleswig-Holstein	DE001	World	15780	Visit 2	0	7271	VISIT_2	Visit 2	6	42	62464	Skin area visit 2	0	2020-04-09	151971	0	2020-04-09 17:22:51	2020-07-16 16:01:37	2020-07-17 12:55:40	DE001	Yes	1	Moderate	3	No	0			No	0			Yes	1	No	0	No	0	No change	4	No change
16	CP288	86	Prod	1345	82	1016	25	NO001	NO001	World	15811	Visit 2	0	7271	VISIT_2	Visit 2	6	42	62524	Skin area visit 2	0	2020-04-16	152051	0	2020-04-16 15:48:50	2020-05-06 19:48:19	2020-07-17 12:55:40	NO001	Yes	1	Very mild	1	Yes	1	Very mild	1	No	0			No	0	No	0	No	0	No change	4	No change
16	CP288	86	Prod	1347	82	1018	25	NO001	NO001	World	15873	Visit 2	0	7271	VISIT_2	Visit 2	6	42	62644	Skin area visit 2	0	2020-04-15	152211	0	2020-04-15 10:27:58	2020-07-07 16:46:28	2020-07-17 12:55:40	NO001	Yes	1	Very mild	1	Yes	1	Very mild	1	Yes	1	Very mild	1	No	0	No	0	No	0	No change	4	A little worse
16	CP288	86	Prod	1358	78	2021	22	Universitätsklinikum Schleswig-Holstein	DE001	World	16069	Visit 2	0	7271	VISIT_2	Visit 2	6	42	63536	Skin area visit 2	0	2020-04-20	153905	0	2020-04-27 12:16:37	2020-07-16 16:02:38	2020-07-17 12:55:40	DE001	No	0			No	0			No	0			No	0	No	0	No	0	No change	4	No change
16	CP288	86	Prod	1359	78	2022	22	Universitätsklinikum Schleswig-Holstein	DE001	World	16100	Visit 2	0	7271	VISIT_2	Visit 2	6	42	63596	Skin area visit 2	0	2020-03-20	153985	0	2020-04-02 07:58:15	2020-07-16 16:03:08	2020-07-17 12:55:40	DE001	No	0			No	0			No	0			No	0	No	0	No	0	No change	4	No change
16	CP288	86	Prod	1360	78	2023	22	Universitätsklinikum Schleswig-Holstein	DE001	World	16131	Visit 2	0	7271	VISIT_2	Visit 2	6	42	63656	Skin area visit 2	0	2020-03-23	154016	0	2020-04-27 08:06:23	2020-07-16 16:03:39	2020-07-17 12:55:40	DE001	Yes	1	Mild	2	Yes	1	Mild	2	No	0			No	0	No	0	No	0	No change	4	No change
16	CP288	86	Prod	1361	80	2084	24	Sanitätshaus Fürst GmbH	DE003	World	16162	Visit 2	0	7271	VISIT_2	Visit 2	6	42	63716	Skin area visit 2	0	2020-04-08	154145	0	2020-04-08 18:46:14	2020-07-03 13:30:39	2020-07-17 12:55:40	DE003	No	0			No	0			No	0			No	0	Yes	1	No	0	A little improved	3	A little improved
16	CP288	86	Prod	1362	80	2085	24	Sanitätshaus Fürst GmbH	DE003	World	16193	Visit 2	0	7271	VISIT_2	Visit 2	6	42	63776	Skin area visit 2	0	2020-04-30	154225	0	2020-04-30 16:57:07	2020-07-03 13:31:20	2020-07-17 12:55:40	DE003	No	0			No	0			No	0			No	0	No	0	No	0	No change	4	No change
16	CP288	86	Prod	1402	82	1027	25	NO001	NO001	World	16760	Visit 2	0	7453	VISIT_2	Visit 2	6	42	66137	Skin area visit 2	0	2020-04-22	159480	0	2020-04-22 14:33:55	2020-07-07 16:47:29	2020-07-17 12:55:40	NO001	Yes	1	Very mild	1	Yes	1	Very mild	1	No	0			No	0	No	0	No	0	No change	4	No change
16	CP288	86	Prod	1403	82	1028	25	NO001	NO001	World	16791	Visit 2	0	7453	VISIT_2	Visit 2	6	42	66197	Skin area visit 2	0	2020-04-22	159560	0	2020-04-22 15:24:46	2020-05-06 19:55:13	2020-07-17 12:55:40	NO001	Yes	1	Mild	2	Yes	1	Mild	2	Yes	1	Very mild	1	Yes	1	No	0	No	0	A little improved	3	A little improved
16	CP288	86	Prod	1423	80	2087	24	Sanitätshaus Fürst GmbH	DE003	World	17145	Visit 2	0	7453	VISIT_2	Visit 2	6	42	67681	Skin area visit 2	0	2020-03-18	162143	0	2020-05-06 18:17:47	2020-07-03 13:32:11	2020-07-17 12:55:40	DE003	No	0			No	0			No	0			No	0	No	0	No	0	No change	4	No change
[truncated: 3 more columns]
