# Supplementary material for: Psychometric validation of the Ostomy Skin Tool 2.0
Source: PeerJ. 2023 Dec 18;11:e16685. doi: 10.7717/peerj.16685 (PMC10734405; doi:10.7717/peerj.16685)
Supplement: Supplemental Information 7 [file peerj-11-16685-s007.xlsx]

## Sheet: det_score
projectid	project	studyid	environmentName	subjectId	StudySiteId	Subject	siteid	Site	SiteNumber	SiteGroup	instanceId	InstanceName	InstanceRepeatNumber	folderid	Folder	FolderName	FolderSeq	TargetDays	DataPageId	DataPageName	PageRepeatNumber	RecordDate	RecordId	RecordPosition	MinCreated	MaxUpdated	SaveTS	StudyEnvSiteNumber	DISCOLOUR_AREA	DISCOLOUR_AREA_STD	DISCOLOUR_SEVERITY	DISCOLOUR_SEVERITY_STD	EROSION_AREA	EROSION_AREA_STD	EROSION_SEVERITY	EROSION_SEVERITY_STD	OVERGROWTH_AREA	OVERGROWTH_AREA_STD	OVERGROWTH_SEVERITY	OVERGROWTH_SEVERITY_STD	DETSCORE_TOTAL	DETSCORE_TOTAL_RAW
16	CP288	86	Prod	1093	78	2001	22	Universitätsklinikum Schleswig-Holstein	DE001	World	9126	DET score CA visit 1	0	5862	DET_CA_V1	DET score CA visit 1	22		47775	DET score by external nurse	0		131058	0	2020-06-12 09:38:20	2020-06-23 15:48:53	2020-07-17 12:54:17	DE001
16	CP288	86	Prod	1093	78	2001	22	Universitätsklinikum Schleswig-Holstein	DE001	World	9129	DET score DK visit 1	0	5865	DET_DK_V1	DET score DK visit 1	25		47778	DET score by external nurse	0		131061	0	2020-06-13 14:17:09	2020-06-13 14:17:09	2020-07-17 12:54:17	DE001	1	1	2	2	1	1	1	1	0	0
16	CP288	86	Prod	1093	78	2001	22	Universitätsklinikum Schleswig-Holstein	DE001	World	9130	DET score DK visit 2	0	5866	DET_DK_V2	DET score DK visit 2	26		47779	DET score by external nurse	0		131062	0	2020-06-13 14:28:25	2020-06-13 14:28:25	2020-07-17 12:54:17	DE001	0	0			0	0			0	0
16	CP288	86	Prod	1093	78	2001	22	Universitätsklinikum Schleswig-Holstein	DE001	World	9131	DET score DK visit 3	0	5867	DET_DK_V3	DET score DK visit 3	27		47780	DET score by external nurse	0		131063	0	2020-06-13 14:39:46	2020-06-13 14:39:46	2020-07-17 12:54:17	DE001	0	0			0	0			0	0
16	CP288	86	Prod	1094	78	2002	22	Universitätsklinikum Schleswig-Holstein	DE001	World	9157	DET score CA visit 1	0	5862	DET_CA_V1	DET score CA visit 1	22		47835	DET score by external nurse	0		131138	0	2020-06-12 09:48:28	2020-06-23 15:50:49	2020-07-17 12:54:17	DE001
16	CP288	86	Prod	1094	78	2002	22	Universitätsklinikum Schleswig-Holstein	DE001	World	9160	DET score DK visit 1	0	5865	DET_DK_V1	DET score DK visit 1	25		47838	DET score by external nurse	0		131141	0	2020-06-13 14:18:05	2020-06-13 14:18:05	2020-07-17 12:54:17	DE001	1	1	1	1	0	0			0	0
16	CP288	86	Prod	1095	78	2003	22	Universitätsklinikum Schleswig-Holstein	DE001	World	9191	DET score DK visit 1	0	5865	DET_DK_V1	DET score DK visit 1	25		47898	DET score by external nurse	0		131221	0	2020-06-13 14:18:49	2020-06-13 14:18:49	2020-07-17 12:54:17	DE001	0	0			0	0			0	0
16	CP288	86	Prod	1095	78	2003	22	Universitätsklinikum Schleswig-Holstein	DE001	World	9192	DET score DK visit 2	0	5866	DET_DK_V2	DET score DK visit 2	26		47899	DET score by external nurse	0		131222	0	2020-06-13 14:29:01	2020-06-13 14:29:01	2020-07-17 12:54:17	DE001	1	1	2	2	1	1	2	2	0	0
16	CP288	86	Prod	1096	78	2004	22	Universitätsklinikum Schleswig-Holstein	DE001	World	9222	DET score DK visit 1	0	5865	DET_DK_V1	DET score DK visit 1	25		47958	DET score by external nurse	0		131301	0	2020-06-13 14:19:21	2020-06-13 14:19:21	2020-07-17 12:54:17	DE001	1	1	1	1	0	0			0	0
16	CP288	86	Prod	1096	78	2004	22	Universitätsklinikum Schleswig-Holstein	DE001	World	9223	DET score DK visit 2	0	5866	DET_DK_V2	DET score DK visit 2	26		47959	DET score by external nurse	0		131302	0	2020-06-13 14:29:31	2020-06-13 14:29:31	2020-07-17 12:54:17	DE001	1	1	2	2	1	1	1	1	0	0
16	CP288	86	Prod	1097	78	2005	22	Universitätsklinikum Schleswig-Holstein	DE001	World	9253	DET score DK visit 1	0	5865	DET_DK_V1	DET score DK visit 1	25		48018	DET score by external nurse	0		131332	0	2020-06-13 14:19:46	2020-06-13 14:19:46	2020-07-17 12:54:17	DE001	0	0			0	0			0	0
16	CP288	86	Prod	1097	78	2005	22	Universitätsklinikum Schleswig-Holstein	DE001	World	9254	DET score DK visit 2	0	5866	DET_DK_V2	DET score DK visit 2	26		48019	DET score by external nurse	0		131333	0	2020-06-13 14:30:09	2020-06-13 14:30:09	2020-07-17 12:54:17	DE001	0	0			0	0			0	0
16	CP288	86	Prod	1097	78	2005	22	Universitätsklinikum Schleswig-Holstein	DE001	World	9255	DET score DK visit 3	0	5867	DET_DK_V3	DET score DK visit 3	27		48020	DET score by external nurse	0		131334	0	2020-06-13 14:39:23	2020-06-13 14:39:23	2020-07-17 12:54:17	DE001	0	0			0	0			0	0
16	CP288	86	Prod	1100	78	2008	22	Universitätsklinikum Schleswig-Holstein	DE001	World	9346	DET score DK visit 1	0	5865	DET_DK_V1	DET score DK visit 1	25		48198	DET score by external nurse	0		131621	0	2020-06-13 14:20:22	2020-06-13 14:20:22	2020-07-17 12:54:17	DE001	1	1	2	2	1	1	1	1	0	0
16	CP288	86	Prod	1100	78	2008	22	Universitätsklinikum Schleswig-Holstein	DE001	World	9347	DET score DK visit 2	0	5866	DET_DK_V2	DET score DK visit 2	26		48199	DET score by external nurse	0		131622	0	2020-06-13 14:30:37	2020-06-13 14:30:37	2020-07-17 12:54:17	DE001	1	1	2	2	1	1	1	1	0	0
16	CP288	86	Prod	1101	78	2009	22	Universitätsklinikum Schleswig-Holstein	DE001	World	9377	DET score DK visit 1	0	5865	DET_DK_V1	DET score DK visit 1	25		48258	DET score by external nurse	0		131701	0	2020-06-13 14:20:50	2020-06-13 14:20:50	2020-07-17 12:54:17	DE001	1	1	1	1	0	0			0	0
16	CP288	86	Prod	1101	78	2009	22	Universitätsklinikum Schleswig-Holstein	DE001	World	9378	DET score DK visit 2	0	5866	DET_DK_V2	DET score DK visit 2	26		48259	DET score by external nurse	0		131702	0	2020-06-13 14:31:22	2020-06-13 14:31:22	2020-07-17 12:54:17	DE001	0	0			0	0			0	0
16	CP288	86	Prod	1102	78	2010	22	Universitätsklinikum Schleswig-Holstein	DE001	World	9408	DET score DK visit 1	0	5865	DET_DK_V1	DET score DK visit 1	25		48318	DET score by external nurse	0		131781	0	2020-06-13 14:22:01	2020-06-13 14:22:01	2020-07-17 12:54:17	DE001	3	3	2	2	1	1	1	1	0	0
16	CP288	86	Prod	1102	78	2010	22	Universitätsklinikum Schleswig-Holstein	DE001	World	9409	DET score DK visit 2	0	5866	DET_DK_V2	DET score DK visit 2	26		48319	DET score by external nurse	0		131782	0	2020-06-13 14:31:54	2020-06-13 14:31:54	2020-07-17 12:54:17	DE001	3	3	2	2	1	1	1	1	0	0
16	CP288	86	Prod	1102	78	2010	22	Universitätsklinikum Schleswig-Holstein	DE001	World	9410	DET score DK visit 3	0	5867	DET_DK_V3	DET score DK visit 3	27		48320	DET score by external nurse	0		131783	0	2020-06-13 14:38:56	2020-06-13 14:38:56	2020-07-17 12:54:17	DE001	3	3	1	1	0	0			0	0
16	CP288	86	Prod	1103	81	2041	23	Klinikum der Universitat Munchen- Grosshadern	DE002	World	9439	DET score DK visit 1	0	5865	DET_DK_V1	DET score DK visit 1	25		48378	DET score by external nurse	0		131861	0	2020-06-22 08:45:08	2020-06-22 08:45:08	2020-07-17 12:54:17	DE002	1	1	2	2	1	1	1	1	0	0
16	CP288	86	Prod	1103	81	2041	23	Klinikum der Universitat Munchen- Grosshadern	DE002	World	9440	DET score DK visit 2	0	5866	DET_DK_V2	DET score DK visit 2	26		48379	DET score by external nurse	0		131862	0	2020-07-02 18:24:52	2020-07-02 18:24:52	2020-07-17 12:54:17	DE002	1	1	2	2	1	1	1	1	0	0
16	CP288	86	Prod	1103	81	2041	23	Klinikum der Universitat Munchen- Grosshadern	DE002	World	9441	DET score DK visit 3	0	5867	DET_DK_V3	DET score DK visit 3	27		48380	DET score by external nurse	0		131863	0	2020-07-02 18:25:18	2020-07-02 18:25:18	2020-07-17 12:54:17	DE002	1	1	1	1	0	0			0	0
16	CP288	86	Prod	1104	81	2042	23	Klinikum der Universitat Munchen- Grosshadern	DE002	World	9470	DET score DK visit 1	0	5865	DET_DK_V1	DET score DK visit 1	25		48438	DET score by external nurse	0		131941	0	2020-06-22 08:45:41	2020-06-22 08:45:41	2020-07-17 12:54:17	DE002	1	1	1	1	0	0			0	0
16	CP288	86	Prod	1104	81	2042	23	Klinikum der Universitat Munchen- Grosshadern	DE002	World	9471	DET score DK visit 2	0	5866	DET_DK_V2	DET score DK visit 2	26		48439	DET score by external nurse	0		131942	0	2020-06-22 08:49:15	2020-06-22 08:49:15	2020-07-17 12:54:17	DE002	1	1	2	2	1	1	2	2	0	0
16	CP288	86	Prod	1104	81	2042	23	Klinikum der Universitat Munchen- Grosshadern	DE002	World	9472	DET score DK visit 3	0	5867	DET_DK_V3	DET score DK visit 3	27		48440	DET score by external nurse	0		131943	0	2020-06-22 08:52:23	2020-06-22 08:52:23	2020-07-17 12:54:17	DE002	1	1	1	1	0	0			0	0
16	CP288	86	Prod	1105	81	2043	23	Klinikum der Universitat Munchen- Grosshadern	DE002	World	9501	DET score DK visit 1	0	5865	DET_DK_V1	DET score DK visit 1	25		48498	DET score by external nurse	0		131972	0	2020-06-22 08:46:24	2020-06-22 08:46:24	2020-07-17 12:54:17	DE002	1	1	2	2	1	1	1	1	0	0
16	CP288	86	Prod	1105	81	2043	23	Klinikum der Universitat Munchen- Grosshadern	DE002	World	9502	DET score DK visit 2	0	5866	DET_DK_V2	DET score DK visit 2	26		48499	DET score by external nurse	0		131973	0	2020-06-22 08:49:31	2020-06-22 08:49:31	2020-07-17 12:54:17	DE002	1	1	1	1	0	0			0	0
16	CP288	86	Prod	1105	81	2043	23	Klinikum der Universitat Munchen- Grosshadern	DE002	World	9503	DET score DK visit 3	0	5867	DET_DK_V3	DET score DK visit 3	27		48500	DET score by external nurse	0		131974	0	2020-06-22 08:51:54	2020-06-22 08:51:54	2020-07-17 12:54:17	DE002	0	0			0	0			0	0
16	CP288	86	Prod	1106	81	2044	23	Klinikum der Universitat Munchen- Grosshadern	DE002	World	9532	DET score DK visit 1	0	5865	DET_DK_V1	DET score DK visit 1	25		48558	DET score by external nurse	0		132101	0	2020-06-22 08:46:46	2020-06-22 08:46:46	2020-07-17 12:54:17	DE002	1	1	2	2	1	1	2	2	0	0
16	CP288	86	Prod	1106	81	2044	23	Klinikum der Universitat Munchen- Grosshadern	DE002	World	9533	DET score DK visit 2	0	5866	DET_DK_V2	DET score DK visit 2	26		48559	DET score by external nurse	0		132102	0	2020-06-22 08:49:57	2020-06-22 08:49:57	2020-07-17 12:54:17	DE002	1	1	2	2	1	1	1	1	1	1	1	1	7	7
16	CP288	86	Prod	1106	81	2044	23	Klinikum der Universitat Munchen- Grosshadern	DE002	World	9534	DET score DK visit 3	0	5867	DET_DK_V3	DET score DK visit 3	27		48560	DET score by external nurse	0		132103	0	2020-06-22 08:51:40	2020-06-22 08:51:40	2020-07-17 12:54:17	DE002	1	1	2	2	0	0			1	1	1	1
16	CP288	86	Prod	1107	81	2045	23	Klinikum der Universitat Munchen- Grosshadern	DE002	World	9563	DET score DK visit 1	0	5865	DET_DK_V1	DET score DK visit 1	25		48618	DET score by external nurse	0		132181	0	2020-06-22 08:47:19	2020-06-22 08:47:19	2020-07-17 12:54:17	DE002	3	3	2	2	1	1	2	2	0	0
16	CP288	86	Prod	1107	81	2045	23	Klinikum der Universitat Munchen- Grosshadern	DE002	World	9564	DET score DK visit 2	0	5866	DET_DK_V2	DET score DK visit 2	26		48619	DET score by external nurse	0		132182	0	2020-06-22 08:50:25	2020-07-02 18:29:55	2020-07-17 12:54:17	DE002	3	3	2	2	1	1	1	1	1	1	2	2	10	10
16	CP288	86	Prod	1107	81	2045	23	Klinikum der Universitat Munchen- Grosshadern	DE002	World	9565	DET score DK visit 3	0	5867	DET_DK_V3	DET score DK visit 3	27		48620	DET score by external nurse	0		132183	0	2020-07-02 18:25:59	2020-07-02 18:25:59	2020-07-17 12:54:17	DE002	3	3	2	2	1	1	1	1	1	1	2	2	10	10
16	CP288	86	Prod	1108	81	2046	23	Klinikum der Universitat Munchen- Grosshadern	DE002	World	9594	DET score DK visit 1	0	5865	DET_DK_V1	DET score DK visit 1	25		48678	DET score by external nurse	0		132261	0	2020-06-22 08:48:07	2020-06-22 08:48:07	2020-07-17 12:54:17	DE002	1	1	2	2	1	1	2	2	1	1	1	1	8	8
16	CP288	86	Prod	1108	81	2046	23	Klinikum der Universitat Munchen- Grosshadern	DE002	World	9595	DET score DK visit 2	0	5866	DET_DK_V2	DET score DK visit 2	26		48679	DET score by external nurse	0		132262	0	2020-06-22 08:50:52	2020-06-22 08:50:52	2020-07-17 12:54:17	DE002	1	1	2	2	1	1	1	1	1	1	1	1	7	7
16	CP288	86	Prod	1108	81	2046	23	Klinikum der Universitat Munchen- Grosshadern	DE002	World	9596	DET score DK visit 3	0	5867	DET_DK_V3	DET score DK visit 3	27		48680	DET score by external nurse	0		132263	0	2020-06-22 08:51:16	2020-06-22 08:51:16	2020-07-17 12:54:17	DE002	2	2	2	2	1	1	1	1	1	1	1	1	8	8
16	CP288	86	Prod	1109	81	2047	23	Klinikum der Universitat Munchen- Grosshadern	DE002	World	9625	DET score DK visit 1	0	5865	DET_DK_V1	DET score DK visit 1	25		48738	DET score by external nurse	0		132292	0	2020-06-22 08:48:41	2020-06-22 08:48:41	2020-07-17 12:54:17	DE002	1	1	1	1	0	0			0	0
16	CP288	86	Prod	1114	80	2072	24	Sanitätshaus Fürst GmbH	DE003	World	9780	DET score DK visit 1	0	5865	DET_DK_V1	DET score DK visit 1	25		49038	DET score by external nurse	0		132741	0	2020-06-15 11:21:44	2020-06-15 11:21:44	2020-07-17 12:54:17	DE003	1	1	2	2	1	1	1	1	0	0
16	CP288	86	Prod	1115	80	2073	24	Sanitätshaus Fürst GmbH	DE003	World	9811	DET score DK visit 1	0	5865	DET_DK_V1	DET score DK visit 1	25		49098	DET score by external nurse	0		132821	0	2020-06-15 11:22:21	2020-06-15 11:30:04	2020-07-17 12:54:17	DE003	3	3	1	1	0	0			0	0
16	CP288	86	Prod	1115	80	2073	24	Sanitätshaus Fürst GmbH	DE003	World	9812	DET score DK visit 2	0	5866	DET_DK_V2	DET score DK visit 2	26		49099	DET score by external nurse	0		132822	0	2020-06-15 11:36:26	2020-06-15 11:36:26	2020-07-17 12:54:17	DE003	2	2	1	1	0	0			0	0
16	CP288	86	Prod	1116	80	2074	24	Sanitätshaus Fürst GmbH	DE003	World	9843	DET score DK visit 2	0	5866	DET_DK_V2	DET score DK visit 2	26		49159	DET score by external nurse	0		132902	0	2020-07-02 18:38:54	2020-07-02 18:38:54	2020-07-17 12:54:17	DE003	1	1	2	2	1	1	1	1	0	0
16	CP288	86	Prod	1117	80	2075	24	Sanitätshaus Fürst GmbH	DE003	World	9873	DET score DK visit 1	0	5865	DET_DK_V1	DET score DK visit 1	25		49218	DET score by external nurse	0		132981	0	2020-06-15 11:23:10	2020-06-15 11:23:10	2020-07-17 12:54:17	DE003	3	3	2	2	0	0			1	1	2	2
16	CP288	86	Prod	1171	82	1001	25	NO001	NO001	World	11397	DET score DK visit 1	0	7003	DET_DK_V1	DET score DK visit 1	25		52562	DET score by external nurse	0		137667	0	2020-06-15 14:37:04	2020-06-15 14:37:04	2020-07-17 12:54:17	NO001	1	1	2	2	1	1	1	1	0	0
16	CP288	86	Prod	1171	82	1001	25	NO001	NO001	World	11398	DET score DK visit 2	0	7004	DET_DK_V2	DET score DK visit 2	26		52563	DET score by external nurse	0		137668	0	2020-06-15 14:44:58	2020-06-15 14:44:58	2020-07-17 12:54:17	NO001	1	1	2	2	1	1	1	1	0	0
16	CP288	86	Prod	1171	82	1001	25	NO001	NO001	World	11399	DET score DK visit 3	0	7005	DET_DK_V3	DET score DK visit 3	27		52564	DET score by external nurse	0		137669	0	2020-06-15 14:48:26	2020-06-15 14:48:26	2020-07-17 12:54:17	NO001	1	1	1	1	0	0			0	0
16	CP288	86	Prod	1172	82	1002	25	NO001	NO001	World	11428	DET score DK visit 1	0	7003	DET_DK_V1	DET score DK visit 1	25		52622	DET score by external nurse	0		137698	0	2020-06-15 14:37:24	2020-06-15 14:37:24	2020-07-17 12:54:17	NO001	2	2	1	1	0	0			0	0
16	CP288	86	Prod	1173	82	1003	25	NO001	NO001	World	11459	DET score DK visit 1	0	7003	DET_DK_V1	DET score DK visit 1	25		52682	DET score by external nurse	0		137827	0	2020-06-15 14:37:45	2020-06-15 14:37:45	2020-07-17 12:54:17	NO001	1	1	1	1	0	0			0	0
16	CP288	86	Prod	1173	82	1003	25	NO001	NO001	World	11460	DET score DK visit 2	0	7004	DET_DK_V2	DET score DK visit 2	26		52683	DET score by external nurse	0		137828	0	2020-06-15 14:45:20	2020-06-15 14:45:20	2020-07-17 12:54:17	NO001	0	0			0	0			0	0
16	CP288	86	Prod	1173	82	1003	25	NO001	NO001	World	11461	DET score DK visit 3	0	7005	DET_DK_V3	DET score DK visit 3	27		52684	DET score by external nurse	0		137829	0	2020-06-15 14:48:47	2020-06-15 14:48:47	2020-07-17 12:54:17	NO001	1	1	1	1	0	0			0	0
16	CP288	86	Prod	1174	82	1004	25	NO001	NO001	World	11487	DET score CA visit 1	0	7000	DET_CA_V1	DET score CA visit 1	22		52739	DET score by external nurse	0		137904	0	2020-02-18 11:00:51	2020-02-18 11:00:51	2020-07-17 12:54:17	NO001
16	CP288	86	Prod	1174	82	1004	25	NO001	NO001	World	11490	DET score DK visit 1	0	7003	DET_DK_V1	DET score DK visit 1	25		52742	DET score by external nurse	0		137907	0	2020-06-15 14:42:43	2020-06-15 14:42:43	2020-07-17 12:54:17	NO001	1	1	1	1	0	0			0	0
16	CP288	86	Prod	1174	82	1004	25	NO001	NO001	World	11491	DET score DK visit 2	0	7004	DET_DK_V2	DET score DK visit 2	26		52743	DET score by external nurse	0		137908	0	2020-06-15 14:44:38	2020-06-15 14:44:38	2020-07-17 12:54:17	NO001	1	1	1	1	1	1			0	0
16	CP288	86	Prod	1174	82	1004	25	NO001	NO001	World	11492	DET score DK visit 3	0	7005	DET_DK_V3	DET score DK visit 3	27		52744	DET score by external nurse	0		137909	0	2020-06-15 14:49:43	2020-06-15 14:49:43	2020-07-17 12:54:17	NO001	0	0			0	0			0	0
16	CP288	86	Prod	1175	82	1005	25	NO001	NO001	World	11521	DET score DK visit 1	0	7003	DET_DK_V1	DET score DK visit 1	25		52802	DET score by external nurse	0		137987	0	2020-06-15 14:43:08	2020-06-15 14:43:08	2020-07-17 12:54:17	NO001	1	1	1	1	0	0			0	0
16	CP288	86	Prod	1175	82	1005	25	NO001	NO001	World	11522	DET score DK visit 2	0	7004	DET_DK_V2	DET score DK visit 2	26		52803	DET score by external nurse	0		137988	0	2020-06-15 14:44:16	2020-06-15 14:44:16	2020-07-17 12:54:17	NO001	1	1	1	1	0	0			0	0
16	CP288	86	Prod	1175	82	1005	25	NO001	NO001	World	11523	DET score DK visit 3	0	7005	DET_DK_V3	DET score DK visit 3	27		52804	DET score by external nurse	0		137989	0	2020-06-15 14:50:04	2020-06-15 14:50:04	2020-07-17 12:54:17	NO001	1	1	1	1	0	0			0	0
16	CP288	86	Prod	1176	82	1006	25	NO001	NO001	World	11552	DET score DK visit 1	0	7003	DET_DK_V1	DET score DK visit 1	25		52862	DET score by external nurse	0		138018	0	2020-06-15 14:38:10	2020-06-15 14:38:10	2020-07-17 12:54:17	NO001	2	2	1	1	1	1	1	1	0	0
16	CP288	86	Prod	1176	82	1006	25	NO001	NO001	World	11553	DET score DK visit 2	0	7004	DET_DK_V2	DET score DK visit 2	26		52863	DET score by external nurse	0		138019	0	2020-06-15 14:45:46	2020-06-15 14:45:46	2020-07-17 12:54:17	NO001	1	1	2	2	1	1	1	1	0	0
16	CP288	86	Prod	1177	82	1007	25	NO001	NO001	World	11583	DET score DK visit 1	0	7003	DET_DK_V1	DET score DK visit 1	25		52922	DET score by external nurse	0		138147	0	2020-06-15 14:38:35	2020-06-15 14:38:35	2020-07-17 12:54:17	NO001	1	1	1	1	0	0			0	0
16	CP288	86	Prod	1177	82	1007	25	NO001	NO001	World	11584	DET score DK visit 2	0	7004	DET_DK_V2	DET score DK visit 2	26		52923	DET score by external nurse	0		138148	0	2020-06-15 14:46:03	2020-06-15 14:46:03	2020-07-17 12:54:17	NO001	2	2	1	1	0	0			0	0
16	CP288	86	Prod	1177	82	1007	25	NO001	NO001	World	11585	DET score DK visit 3	0	7005	DET_DK_V3	DET score DK visit 3	27		52924	DET score by external nurse	0		138149	0	2020-06-15 14:49:02	2020-06-15 14:49:02	2020-07-17 12:54:17	NO001	0	0			0	0			0	0
16	CP288	86	Prod	1178	82	1008	25	NO001	NO001	World	11614	DET score DK visit 1	0	7003	DET_DK_V1	DET score DK visit 1	25		52982	DET score by external nurse	0		138178	0	2020-06-15 14:39:02	2020-06-15 14:39:02	2020-07-17 12:54:17	NO001	1	1	1	1	0	0			0	0
16	CP288	86	Prod	1178	82	1008	25	NO001	NO001	World	11615	DET score DK visit 2	0	7004	DET_DK_V2	DET score DK visit 2	26		52983	DET score by external nurse	0		138179	0	2020-07-15 07:53:41	2020-07-15 07:53:41	2020-07-17 12:54:17	NO001	1	1	1	1	0	0			0	0
16	CP288	86	Prod	1178	82	1008	25	NO001	NO001	World	11616	DET score DK visit 3	0	7005	DET_DK_V3	DET score DK visit 3	27		52984	DET score by external nurse	0		138180	0	2020-07-15 07:54:06	2020-07-15 07:54:06	2020-07-17 12:54:17	NO001	1	1	1	1	0	0			0	0
16	CP288	86	Prod	1179	82	1009	25	NO001	NO001	World	11645	DET score DK visit 1	0	7003	DET_DK_V1	DET score DK visit 1	25		53042	DET score by external nurse	0		138307	0	2020-06-15 14:39:18	2020-06-15 14:39:18	2020-07-17 12:54:17	NO001	1	1	1	1	0	0			0	0
16	CP288	86	Prod	1179	82	1009	25	NO001	NO001	World	11646	DET score DK visit 2	0	7004	DET_DK_V2	DET score DK visit 2	26		53043	DET score by external nurse	0		138308	0	2020-06-15 14:46:24	2020-06-15 14:46:24	2020-07-17 12:54:17	NO001	2	2	2	2	1	1	1	1	0	0
16	CP288	86	Prod	1180	82	1010	25	NO001	NO001	World	11676	DET score DK visit 1	0	7003	DET_DK_V1	DET score DK visit 1	25		53102	DET score by external nurse	0		138338	0	2020-06-15 14:39:47	2020-06-15 14:39:47	2020-07-17 12:54:17	NO001	1	1	1	1	0	0			0	0
16	CP288	86	Prod	1183	93	5001	29	Fondazione Poliambulanza Istituto Ospedaliero	IT001	World	11728	DET score final visit 2	0	6998	DET_ALL_V2	DET score final visit 2	29		53335	DET score by external nurse	0		138772	0	2020-06-15 07:10:02	2020-07-14 16:26:34	2020-07-17 12:54:17	IT001
16	CP288	86	Prod	1183	93	5001	29	Fondazione Poliambulanza Istituto Ospedaliero	IT001	World	11733	DET score DK visit 1	0	7003	DET_DK_V1	DET score DK visit 1	25		53340	DET score by external nurse	0		138777	0	2020-06-15 07:06:06	2020-06-15 07:06:06	2020-07-17 12:54:17	IT001	0	0			0	0			0	0
16	CP288	86	Prod	1183	93	5001	29	Fondazione Poliambulanza Istituto Ospedaliero	IT001	World	11734	DET score DK visit 2	0	7004	DET_DK_V2	DET score DK visit 2	26		53341	DET score by external nurse	0		138778	0	2020-06-15 07:14:48	2020-07-02 18:41:10	2020-07-17 12:54:17	IT001
16	CP288	86	Prod	1183	93	5001	29	Fondazione Poliambulanza Istituto Ospedaliero	IT001	World	11735	DET score DK visit 3	0	7005	DET_DK_V3	DET score DK visit 3	27		53342	DET score by external nurse	0		138779	0	2020-06-15 07:16:19	2020-06-15 07:17:33	2020-07-17 12:54:17	IT001	1	1	1	1	0	0			0	0
16	CP288	86	Prod	1184	93	5002	29	Fondazione Poliambulanza Istituto Ospedaliero	IT001	World	11759	DET score final visit 2	0	6998	DET_ALL_V2	DET score final visit 2	29		53395	DET score by external nurse	0		138852	0	2020-06-15 07:09:37	2020-07-14 16:27:25	2020-07-17 12:54:17	IT001
16	CP288	86	Prod	1184	93	5002	29	Fondazione Poliambulanza Istituto Ospedaliero	IT001	World	11764	DET score DK visit 1	0	7003	DET_DK_V1	DET score DK visit 1	25		53400	DET score by external nurse	0		138857	0	2020-06-15 07:07:49	2020-06-15 07:07:49	2020-07-17 12:54:17	IT001	1	1	2	2	0	0			1	1	2	2
16	CP288	86	Prod	1184	93	5002	29	Fondazione Poliambulanza Istituto Ospedaliero	IT001	World	11765	DET score DK visit 2	0	7004	DET_DK_V2	DET score DK visit 2	26		53401	DET score by external nurse	0		138858	0	2020-06-15 07:13:58	2020-07-02 18:41:47	2020-07-17 12:54:17	IT001
16	CP288	86	Prod	1184	93	5002	29	Fondazione Poliambulanza Istituto Ospedaliero	IT001	World	11766	DET score DK visit 3	0	7005	DET_DK_V3	DET score DK visit 3	27		53402	DET score by external nurse	0		138859	0	2020-06-15 07:18:24	2020-06-15 07:18:24	2020-07-17 12:54:17	IT001	2	2	2	2	0	0			1	1	2	2
16	CP288	86	Prod	1188	80	2076	24	Sanitätshaus Fürst GmbH	DE003	World	11888	DET score DK visit 1	0	7003	DET_DK_V1	DET score DK visit 1	25		53640	DET score by external nurse	0		139177	0	2020-06-15 11:23:38	2020-06-15 11:23:38	2020-07-17 12:54:17	DE003	1	1	2	2	1	1	1	1	0	0
16	CP288	86	Prod	1188	80	2076	24	Sanitätshaus Fürst GmbH	DE003	World	11889	DET score DK visit 2	0	7004	DET_DK_V2	DET score DK visit 2	26		53641	DET score by external nurse	0		139178	0	2020-06-15 11:37:11	2020-06-15 11:37:11	2020-07-17 12:54:17	DE003	1	1	2	2	1	1	1	1	0	0
16	CP288	86	Prod	1188	80	2076	24	Sanitätshaus Fürst GmbH	DE003	World	11890	DET score DK visit 3	0	7005	DET_DK_V3	DET score DK visit 3	27		53642	DET score by external nurse	0		139179	0	2020-06-15 14:28:08	2020-06-15 14:28:08	2020-07-17 12:54:17	DE003	1	1	2	2	1	1	1	1	0	0
16	CP288	86	Prod	1189	80	2077	24	Sanitätshaus Fürst GmbH	DE003	World	11916	DET score CA visit 1	0	7000	DET_CA_V1	DET score CA visit 1	22		53697	DET score by external nurse	0		139254	0	2020-02-19 17:02:39	2020-07-14 16:19:44	2020-07-17 12:54:17	DE003
16	CP288	86	Prod	1189	80	2077	24	Sanitätshaus Fürst GmbH	DE003	World	11919	DET score DK visit 1	0	7003	DET_DK_V1	DET score DK visit 1	25		53700	DET score by external nurse	0		139257	0	2020-06-15 11:24:05	2020-06-15 11:24:05	2020-07-17 12:54:17	DE003	1	1	1	1	0	0			0	0
16	CP288	86	Prod	1189	80	2077	24	Sanitätshaus Fürst GmbH	DE003	World	11920	DET score DK visit 2	0	7004	DET_DK_V2	DET score DK visit 2	26		53701	DET score by external nurse	0		139258	0	2020-06-15 11:37:35	2020-06-15 11:37:35	2020-07-17 12:54:17	DE003	0	0			0	0			0	0
16	CP288	86	Prod	1189	80	2077	24	Sanitätshaus Fürst GmbH	DE003	World	11921	DET score DK visit 3	0	7005	DET_DK_V3	DET score DK visit 3	27		53702	DET score by external nurse	0		139259	0	2020-07-15 08:16:21	2020-07-15 08:16:21	2020-07-17 12:54:17	DE003	1	1	1	1	0	0			0	0
16	CP288	86	Prod	1190	80	2078	24	Sanitätshaus Fürst GmbH	DE003	World	11950	DET score DK visit 1	0	7003	DET_DK_V1	DET score DK visit 1	25		53760	DET score by external nurse	0		139337	0	2020-06-15 11:24:35	2020-06-15 11:34:13	2020-07-17 12:54:17	DE003	2	2	2	2	1	1	1	1	1	1	1	1	8	8
16	CP288	86	Prod	1190	80	2078	24	Sanitätshaus Fürst GmbH	DE003	World	11951	DET score DK visit 2	0	7004	DET_DK_V2	DET score DK visit 2	26		53761	DET score by external nurse	0		139338	0	2020-06-15 11:38:06	2020-06-15 11:38:06	2020-07-17 12:54:17	DE003	2	2	2	2	1	1	1	1	1	1	1	1	8	8
16	CP288	86	Prod	1190	80	2078	24	Sanitätshaus Fürst GmbH	DE003	World	11952	DET score DK visit 3	0	7005	DET_DK_V3	DET score DK visit 3	27		53762	DET score by external nurse	0		139339	0	2020-06-15 14:28:30	2020-06-15 14:28:30	2020-07-17 12:54:17	DE003	1	1	2	2	0	0			1	1	2	2
16	CP288	86	Prod	1191	80	2079	24	Sanitätshaus Fürst GmbH	DE003	World	11981	DET score DK visit 1	0	7003	DET_DK_V1	DET score DK visit 1	25		53820	DET score by external nurse	0		139417	0	2020-06-15 11:25:34	2020-06-15 11:25:34	2020-07-17 12:54:17	DE003	1	1	2	2	1	1	1	1	1	1	2	2	8	8
16	CP288	86	Prod	1191	80	2079	24	Sanitätshaus Fürst GmbH	DE003	World	11982	DET score DK visit 2	0	7004	DET_DK_V2	DET score DK visit 2	26		53821	DET score by external nurse	0		139418	0	2020-06-15 11:38:29	2020-06-15 11:38:29	2020-07-17 12:54:17	DE003	1	1	1	1	0	0			0	0
16	CP288	86	Prod	1192	80	2080	24	Sanitätshaus Fürst GmbH	DE003	World	12012	DET score DK visit 1	0	7003	DET_DK_V1	DET score DK visit 1	25		53880	DET score by external nurse	0		139497	0	2020-06-15 11:26:20	2020-06-15 11:26:20	2020-07-17 12:54:17	DE003	1	1	2	2	0	0			1	1	1	1
16	CP288	86	Prod	1192	80	2080	24	Sanitätshaus Fürst GmbH	DE003	World	12013	DET score DK visit 2	0	7004	DET_DK_V2	DET score DK visit 2	26		53881	DET score by external nurse	0		139498	0	2020-06-15 11:38:56	2020-06-15 11:38:56	2020-07-17 12:54:17	DE003	1	1	2	2	0	0			1	1	1	1
16	CP288	86	Prod	1192	80	2080	24	Sanitätshaus Fürst GmbH	DE003	World	12014	DET score DK visit 3	0	7005	DET_DK_V3	DET score DK visit 3	27		53882	DET score by external nurse	0		139499	0	2020-06-15 14:28:58	2020-06-15 14:28:58	2020-07-17 12:54:17	DE003	1	1	1	1	0	0			0	0
16	CP288	86	Prod	1279	80	2081	24	Sanitätshaus Fürst GmbH	DE003	World	14112	DET score DK visit 3	0	7005	DET_DK_V3	DET score DK visit 3	27		58449	DET score by external nurse	0		146234	0	2020-06-15 14:29:26	2020-06-15 14:29:26	2020-07-17 12:54:17	DE003	1	1	1	1	0	0			0	0
16	CP288	86	Prod	1279	80	2081	24	Sanitätshaus Fürst GmbH	DE003	World	14113	DET score DK visit 2	0	7004	DET_DK_V2	DET score DK visit 2	26		58450	DET score by external nurse	0		146235	0	2020-06-15 11:39:35	2020-06-15 11:39:35	2020-07-17 12:54:17	DE003	2	2	1	1	0	0			0	0
16	CP288	86	Prod	1279	80	2081	24	Sanitätshaus Fürst GmbH	DE003	World	14114	DET score DK visit 1	0	7003	DET_DK_V1	DET score DK visit 1	25		58451	DET score by external nurse	0		146236	0	2020-06-15 11:26:45	2020-06-15 11:26:45	2020-07-17 12:54:17	DE003	1	1	1	1	0	0			0	0
16	CP288	86	Prod	1280	80	2082	24	Sanitätshaus Fürst GmbH	DE003	World	14144	DET score DK visit 1	0	7003	DET_DK_V1	DET score DK visit 1	25		58515	DET score by external nurse	0		146320	0	2020-06-15 11:27:11	2020-06-15 11:27:11	2020-07-17 12:54:17	DE003	3	3	2	2	1	1	2	2	0	0
16	CP288	86	Prod	1280	80	2082	24	Sanitätshaus Fürst GmbH	DE003	World	14145	DET score DK visit 2	0	7004	DET_DK_V2	DET score DK visit 2	26		58516	DET score by external nurse	0		146321	0	2020-06-15 11:40:01	2020-06-15 11:40:01	2020-07-17 12:54:17	DE003	3	3	2	2	1	1	2	2	0	0
16	CP288	86	Prod	1280	80	2082	24	Sanitätshaus Fürst GmbH	DE003	World	14146	DET score DK visit 3	0	7005	DET_DK_V3	DET score DK visit 3	27		58517	DET score by external nurse	0		146322	0	2020-06-15 14:29:48	2020-06-15 14:29:48	2020-07-17 12:54:17	DE003	3	3	2	2	0	0			0	0
16	CP288	86	Prod	1281	80	2083	24	Sanitätshaus Fürst GmbH	DE003	World	14175	DET score DK visit 1	0	7003	DET_DK_V1	DET score DK visit 1	25		58575	DET score by external nurse	0		146400	0	2020-06-15 11:27:40	2020-06-15 11:27:40	2020-07-17 12:54:17	DE003	1	1	2	2	1	1	2	2	1	1	1	1	8	8
16	CP288	86	Prod	1281	80	2083	24	Sanitätshaus Fürst GmbH	DE003	World	14176	DET score DK visit 2	0	7004	DET_DK_V2	DET score DK visit 2	26		58576	DET score by external nurse	0		146401	0	2020-06-15 11:40:28	2020-06-15 11:40:28	2020-07-17 12:54:17	DE003	1	1	2	2	1	1	1	1	1	1	1	1	7	7
16	CP288	86	Prod	1281	80	2083	24	Sanitätshaus Fürst GmbH	DE003	World	14177	DET score DK visit 3	0	7005	DET_DK_V3	DET score DK visit 3	27		58577	DET score by external nurse	0		146402	0	2020-06-15 14:30:30	2020-06-15 14:30:30	2020-07-17 12:54:17	DE003	1	1	2	2	1	1	1	1	1	1	1	1	7	7
16	CP288	86	Prod	1287	83	6001	26	Illingworth Research Group	UK001	World	14287	DET score DK visit 1	0	7132	DET_DK_V1	DET score DK visit 1	25		58888	DET score by external nurse	0		147031	0	2020-06-12 12:18:47	2020-06-12 12:18:47	2020-07-17 12:54:17	UK001	1	1	2	2	0	0			1	1	1	1
16	CP288	86	Prod	1287	83	6001	26	Illingworth Research Group	UK001	World	14288	DET score DK visit 2	0	7133	DET_DK_V2	DET score DK visit 2	26		58889	DET score by external nurse	0		147032	0	2020-06-22 09:45:17	2020-06-22 09:45:17	2020-07-17 12:54:17	UK001	0	0			0	0			0	0
16	CP288	86	Prod	1287	83	6001	26	Illingworth Research Group	UK001	World	14289	DET score DK visit 3	0	7134	DET_DK_V3	DET score DK visit 3	27		58890	DET score by external nurse	0		147033	0	2020-07-02 18:45:52	2020-07-02 18:45:52	2020-07-17 12:54:17	UK001	1	1	2	2	1	1	2	2	0	0
16	CP288	86	Prod	1288	83	6002	26	Illingworth Research Group	UK001	World	14318	DET score DK visit 1	0	7132	DET_DK_V1	DET score DK visit 1	25		58948	DET score by external nurse	0		147111	0	2020-06-12 12:21:21	2020-06-12 12:21:21	2020-07-17 12:54:17	UK001	1	1	2	2	1	1	1	1	0	0
16	CP288	86	Prod	1288	83	6002	26	Illingworth Research Group	UK001	World	14319	DET score DK visit 2	0	7133	DET_DK_V2	DET score DK visit 2	26		58949	DET score by external nurse	0		147112	0	2020-06-22 09:45:41	2020-06-22 09:45:41	2020-07-17 12:54:17	UK001	1	1	1	1	0	0			0	0
16	CP288	86	Prod	1288	83	6002	26	Illingworth Research Group	UK001	World	14320	DET score DK visit 3	0	7134	DET_DK_V3	DET score DK visit 3	27		58950	DET score by external nurse	0		147113	0	2020-07-02 18:46:22	2020-07-02 18:46:22	2020-07-17 12:54:17	UK001	1	1	2	2	0	0			1	1	1	1
16	CP288	86	Prod	1289	83	6003	26	Illingworth Research Group	UK001	World	14349	DET score DK visit 1	0	7132	DET_DK_V1	DET score DK visit 1	25		59008	DET score by external nurse	0		147191	0	2020-06-12 12:22:25	2020-06-12 12:22:25	2020-07-17 12:54:17	UK001	2	2	2	2	1	1	1	1	0	0
16	CP288	86	Prod	1289	83	6003	26	Illingworth Research Group	UK001	World	14350	DET score DK visit 2	0	7133	DET_DK_V2	DET score DK visit 2	26		59009	DET score by external nurse	0		147192	0	2020-06-22 09:46:00	2020-06-22 09:46:00	2020-07-17 12:54:17	UK001	1	1	1	1	0	0			0	0
16	CP288	86	Prod	1290	83	6004	26	Illingworth Research Group	UK001	World	14380	DET score DK visit 1	0	7132	DET_DK_V1	DET score DK visit 1	25		59068	DET score by external nurse	0		147271	0	2020-07-17 06:25:13	2020-07-17 06:25:13	2020-07-17 12:54:17	UK001	3	3	1	1	0	0			0	0
16	CP288	86	Prod	1290	83	6004	26	Illingworth Research Group	UK001	World	14381	DET score DK visit 2	0	7133	DET_DK_V2	DET score DK visit 2	26		59069	DET score by external nurse	0		147272	0	2020-07-17 06:25:41	2020-07-17 06:25:41	2020-07-17 12:54:17	UK001	3	3	1	1	0	0			0	0
16	CP288	86	Prod	1291	83	6005	26	Illingworth Research Group	UK001	World	14411	DET score DK visit 1	0	7132	DET_DK_V1	DET score DK visit 1	25		59128	DET score by external nurse	0		147382	0	2020-06-12 12:24:24	2020-06-12 12:24:24	2020-07-17 12:54:17	UK001	2	2	2	2	1	1	2	2	0	0
16	CP288	86	Prod	1293	83	6007	26	Illingworth Research Group	UK001	World	14473	DET score DK visit 1	0	7132	DET_DK_V1	DET score DK visit 1	25		59248	DET score by external nurse	0		147511	0	2020-06-12 12:25:33	2020-06-12 12:25:33	2020-07-17 12:54:17	UK001	1	1	1	1	0	0			0	0
16	CP288	86	Prod	1294	83	6008	26	Illingworth Research Group	UK001	World	14504	DET score DK visit 1	0	7132	DET_DK_V1	DET score DK visit 1	25		59308	DET score by external nurse	0		147622	0	2020-06-12 12:26:07	2020-06-12 12:26:07	2020-07-17 12:54:17	UK001	1	1	1	1	0	0			0	0
16	CP288	86	Prod	1294	83	6008	26	Illingworth Research Group	UK001	World	14505	DET score DK visit 2	0	7133	DET_DK_V2	DET score DK visit 2	26		59309	DET score by external nurse	0		147623	0	2020-06-22 09:46:20	2020-06-22 09:46:20	2020-07-17 12:54:17	UK001	3	3	1	1	0	0			0	0
16	CP288	86	Prod	1294	83	6008	26	Illingworth Research Group	UK001	World	14506	DET score DK visit 3	0	7134	DET_DK_V3	DET score DK visit 3	27		59310	DET score by external nurse	0		147624	0	2020-07-02 18:47:22	2020-07-02 18:47:22	2020-07-17 12:54:17	UK001	2	2	1	1	0	0			0	0
16	CP288	86	Prod	1295	83	6009	26	Illingworth Research Group	UK001	World	14535	DET score DK visit 1	0	7132	DET_DK_V1	DET score DK visit 1	25		59368	DET score by external nurse	0		147702	0	2020-07-15 08:08:31	2020-07-15 08:08:31	2020-07-17 12:54:17	UK001	1	1	1	1	0	0			0	0
16	CP288	86	Prod	1295	83	6009	26	Illingworth Research Group	UK001	World	14536	DET score DK visit 2	0	7133	DET_DK_V2	DET score DK visit 2	26		59369	DET score by external nurse	0		147703	0	2020-07-15 08:09:27	2020-07-15 08:09:27	2020-07-17 12:54:17	UK001	1	1	1	1	0	0			0	0
16	CP288	86	Prod	1296	83	6010	26	Illingworth Research Group	UK001	World	14566	DET score DK visit 1	0	7132	DET_DK_V1	DET score DK visit 1	25		59428	DET score by external nurse	0		147751	0	2020-06-12 12:26:43	2020-06-12 12:26:43	2020-07-17 12:54:17	UK001	1	1	2	2	1	1	1	1	0	0
16	CP288	86	Prod	1296	83	6010	26	Illingworth Research Group	UK001	World	14567	DET score DK visit 2	0	7133	DET_DK_V2	DET score DK visit 2	26		59429	DET score by external nurse	0		147752	0	2020-06-22 09:46:40	2020-06-22 09:46:40	2020-07-17 12:54:17	UK001	1	1	2	2	1	1	1	1	0	0
16	CP288	86	Prod	1296	83	6010	26	Illingworth Research Group	UK001	World	14568	DET score DK visit 3	0	7134	DET_DK_V3	DET score DK visit 3	27		59430	DET score by external nurse	0		147753	0	2020-07-02 18:47:48	2020-07-02 18:47:48	2020-07-17 12:54:17	UK001	1	1	2	2	1	1	1	1	0	0
16	CP288	86	Prod	1297	83	6011	26	Illingworth Research Group	UK001	World	14597	DET score DK visit 1	0	7132	DET_DK_V1	DET score DK visit 1	25		59488	DET score by external nurse	0		147862	0	2020-06-12 12:27:08	2020-06-12 12:27:08	2020-07-17 12:54:17	UK001	0	0			0	0			0	0
16	CP288	86	Prod	1297	83	6011	26	Illingworth Research Group	UK001	World	14598	DET score DK visit 2	0	7133	DET_DK_V2	DET score DK visit 2	26		59489	DET score by external nurse	0		147863	0	2020-06-22 09:47:00	2020-06-22 09:47:00	2020-07-17 12:54:17	UK001	3	3	1	1	0	0			0	0
16	CP288	86	Prod	1297	83	6011	26	Illingworth Research Group	UK001	World	14599	DET score DK visit 3	0	7134	DET_DK_V3	DET score DK visit 3	27		59490	DET score by external nurse	0		147864	0	2020-07-02 18:48:15	2020-07-02 18:48:15	2020-07-17 12:54:17	UK001	2	2	1	1	0	0			0	0
16	CP288	86	Prod	1298	83	6012	26	Illingworth Research Group	UK001	World	14628	DET score DK visit 1	0	7132	DET_DK_V1	DET score DK visit 1	25		59548	DET score by external nurse	0		147911	0	2020-07-02 18:49:17	2020-07-02 18:49:17	2020-07-17 12:54:17	UK001	0	0			0	0			0	0
16	CP288	86	Prod	1298	83	6012	26	Illingworth Research Group	UK001	World	14629	DET score DK visit 2	0	7133	DET_DK_V2	DET score DK visit 2	26		59549	DET score by external nurse	0		147912	0	2020-06-22 09:47:39	2020-06-22 09:47:39	2020-07-17 12:54:17	UK001	1	1	1	1	0	0			0	0
16	CP288	86	Prod	1298	83	6012	26	Illingworth Research Group	UK001	World	14630	DET score DK visit 3	0	7134	DET_DK_V3	DET score DK visit 3	27		59550	DET score by external nurse	0		147913	0	2020-07-02 18:48:55	2020-07-02 18:48:55	2020-07-17 12:54:17	UK001	1	1	1	1	0	0			0	0
16	CP288	86	Prod	1299	83	6013	26	Illingworth Research Group	UK001	World	14659	DET score DK visit 1	0	7132	DET_DK_V1	DET score DK visit 1	25		59608	DET score by external nurse	0		148022	0	2020-06-22 09:01:45	2020-06-22 09:01:45	2020-07-17 12:54:17	UK001	1	1	2	2	0	0			1	1	1	1
16	CP288	86	Prod	1299	83	6013	26	Illingworth Research Group	UK001	World	14660	DET score DK visit 2	0	7133	DET_DK_V2	DET score DK visit 2	26		59609	DET score by external nurse	0		148023	0	2020-06-22 09:48:01	2020-06-22 09:48:01	2020-07-17 12:54:17	UK001	1	1	1	1	0	0			0	0
16	CP288	86	Prod	1299	83	6013	26	Illingworth Research Group	UK001	World	14661	DET score DK visit 3	0	7134	DET_DK_V3	DET score DK visit 3	27		59610	DET score by external nurse	0		148024	0	2020-07-02 18:50:07	2020-07-02 18:50:07	2020-07-17 12:54:17	UK001	1	1	1	1	0	0			0	0
16	CP288	86	Prod	1300	83	6014	26	Illingworth Research Group	UK001	World	14690	DET score DK visit 1	0	7132	DET_DK_V1	DET score DK visit 1	25		59668	DET score by external nurse	0		148102	0	2020-06-22 09:02:09	2020-06-22 09:02:09	2020-07-17 12:54:17	UK001	1	1	2	2	1	1	1	1	0	0
16	CP288	86	Prod	1300	83	6014	26	Illingworth Research Group	UK001	World	14691	DET score DK visit 2	0	7133	DET_DK_V2	DET score DK visit 2	26		59669	DET score by external nurse	0		148103	0	2020-06-22 09:48:27	2020-06-22 09:48:27	2020-07-17 12:54:17	UK001	2	2	2	2	1	1	1	1	0	0
16	CP288	86	Prod	1301	83	6015	26	Illingworth Research Group	UK001	World	14721	DET score DK visit 1	0	7132	DET_DK_V1	DET score DK visit 1	25		59728	DET score by external nurse	0		148151	0	2020-07-02 18:54:34	2020-07-02 18:54:34	2020-07-17 12:54:17	UK001	1	1	1	1	0	0			0	0
16	CP288	86	Prod	1302	83	6016	26	Illingworth Research Group	UK001	World	14752	DET score DK visit 1	0	7132	DET_DK_V1	DET score DK visit 1	25		59788	DET score by external nurse	0		148231	0	2020-06-22 09:02:32	2020-06-22 09:02:32	2020-07-17 12:54:17	UK001	0	0			0	0			0	0
16	CP288	86	Prod	1302	83	6016	26	Illingworth Research Group	UK001	World	14753	DET score DK visit 2	0	7133	DET_DK_V2	DET score DK visit 2	26		59789	DET score by external nurse	0		148232	0	2020-06-22 09:49:11	2020-06-22 09:49:11	2020-07-17 12:54:17	UK001	3	3	1	1	0	0			0	0
16	CP288	86	Prod	1302	83	6016	26	Illingworth Research Group	UK001	World	14754	DET score DK visit 3	0	7134	DET_DK_V3	DET score DK visit 3	27		59790	DET score by external nurse	0		148233	0	2020-07-02 18:55:16	2020-07-02 18:55:16	2020-07-17 12:54:17	UK001	1	1	2	2	1	1	1	1	0	0
16	CP288	86	Prod	1303	83	6017	26	Illingworth Research Group	UK001	World	14784	DET score DK visit 2	0	7133	DET_DK_V2	DET score DK visit 2	26		59849	DET score by external nurse	0		148312	0	2020-07-02 18:50:48	2020-07-14 16:42:46	2020-07-17 12:54:17	UK001
16	CP288	86	Prod	1304	83	6018	26	Illingworth Research Group	UK001	World	14814	DET score DK visit 1	0	7132	DET_DK_V1	DET score DK visit 1	25		59908	DET score by external nurse	0		148391	0	2020-06-22 09:03:52	2020-06-22 09:03:52	2020-07-17 12:54:17	UK001	1	1	2	2	1	1	1	1	1	1	1	1	7	7
16	CP288	86	Prod	1304	83	6018	26	Illingworth Research Group	UK001	World	14815	DET score DK visit 2	0	7133	DET_DK_V2	DET score DK visit 2	26		59909	DET score by external nurse	0		148392	0	2020-06-22 09:50:18	2020-06-22 09:50:18	2020-07-17 12:54:17	UK001	1	1	1	1	0	0			0	0
16	CP288	86	Prod	1304	83	6018	26	Illingworth Research Group	UK001	World	14816	DET score DK visit 3	0	7134	DET_DK_V3	DET score DK visit 3	27		59910	DET score by external nurse	0		148393	0	2020-07-15 08:11:22	2020-07-15 08:11:22	2020-07-17 12:54:17	UK001	1	1	2	2	1	1	1	1	0	0
16	CP288	86	Prod	1305	83	6019	26	Illingworth Research Group	UK001	World	14845	DET score DK visit 1	0	7132	DET_DK_V1	DET score DK visit 1	25		59968	DET score by external nurse	0		148502	0	2020-06-22 09:04:45	2020-06-22 09:04:45	2020-07-17 12:54:17	UK001	1	1	2	2	0	0			1	1	1	1
16	CP288	86	Prod	1305	83	6019	26	Illingworth Research Group	UK001	World	14846	DET score DK visit 2	0	7133	DET_DK_V2	DET score DK visit 2	26		59969	DET score by external nurse	0		148503	0	2020-06-22 09:50:48	2020-06-22 09:50:48	2020-07-17 12:54:17	UK001	2	2	2	2	0	0			1	1	1	1
16	CP288	86	Prod	1305	83	6019	26	Illingworth Research Group	UK001	World	14847	DET score DK visit 3	0	7134	DET_DK_V3	DET score DK visit 3	27		59970	DET score by external nurse	0		148504	0	2020-07-02 18:56:09	2020-07-02 18:56:09	2020-07-17 12:54:17	UK001	2	2	2	2	1	1	1	1	1	1	1	1	8	8
16	CP288	86	Prod	1306	83	6020	26	Illingworth Research Group	UK001	World	14876	DET score DK visit 1	0	7132	DET_DK_V1	DET score DK visit 1	25		60028	DET score by external nurse	0		148582	0	2020-06-22 09:05:07	2020-06-22 09:05:07	2020-07-17 12:54:17	UK001	0	0			0	0			0	0
16	CP288	86	Prod	1306	83	6020	26	Illingworth Research Group	UK001	World	14877	DET score DK visit 2	0	7133	DET_DK_V2	DET score DK visit 2	26		60029	DET score by external nurse	0		148583	0	2020-06-22 09:51:05	2020-06-22 09:51:05	2020-07-17 12:54:17	UK001	0	0			0	0			0	0
16	CP288	86	Prod	1306	83	6020	26	Illingworth Research Group	UK001	World	14878	DET score DK visit 3	0	7134	DET_DK_V3	DET score DK visit 3	27		60030	DET score by external nurse	0		148584	0	2020-07-02 18:56:35	2020-07-02 18:56:35	2020-07-17 12:54:17	UK001	0	0			0	0			0	0
16	CP288	86	Prod	1307	83	6021	26	Illingworth Research Group	UK001	World	14907	DET score DK visit 1	0	7132	DET_DK_V1	DET score DK visit 1	25		60088	DET score by external nurse	0		148631	0	2020-06-22 09:05:37	2020-06-22 09:05:37	2020-07-17 12:54:17	UK001	1	1	1	1	0	0			0	0
16	CP288	86	Prod	1308	83	6022	26	Illingworth Research Group	UK001	World	14938	DET score DK visit 1	0	7132	DET_DK_V1	DET score DK visit 1	25		60148	DET score by external nurse	0		148742	0	2020-06-22 09:06:07	2020-06-22 09:06:07	2020-07-17 12:54:17	UK001	1	1	2	2	1	1	1	1	0	0
16	CP288	86	Prod	1308	83	6022	26	Illingworth Research Group	UK001	World	14939	DET score DK visit 2	0	7133	DET_DK_V2	DET score DK visit 2	26		60149	DET score by external nurse	0		148743	0	2020-06-22 09:51:30	2020-06-22 09:51:30	2020-07-17 12:54:17	UK001	1	1	1	1	0	0			0	0
16	CP288	86	Prod	1308	83	6022	26	Illingworth Research Group	UK001	World	14940	DET score DK visit 3	0	7134	DET_DK_V3	DET score DK visit 3	27		60150	DET score by external nurse	0		148744	0	2020-07-02 18:57:00	2020-07-02 18:57:00	2020-07-17 12:54:17	UK001	1	1	1	1	0	0			0	0
16	CP288	86	Prod	1309	83	6023	26	Illingworth Research Group	UK001	World	14969	DET score DK visit 1	0	7132	DET_DK_V1	DET score DK visit 1	25		60208	DET score by external nurse	0		148791	0	2020-06-22 09:06:46	2020-06-22 09:06:46	2020-07-17 12:54:17	UK001	1	1	2	2	0	0			1	1	2	2
16	CP288	86	Prod	1309	83	6023	26	Illingworth Research Group	UK001	World	14970	DET score DK visit 2	0	7133	DET_DK_V2	DET score DK visit 2	26		60209	DET score by external nurse	0		148792	0	2020-07-02 18:58:00	2020-07-02 18:58:00	2020-07-17 12:54:17	UK001	2	2	2	2	0	0			1	1	1	1
16	CP288	86	Prod	1309	83	6023	26	Illingworth Research Group	UK001	World	14971	DET score DK visit 3	0	7134	DET_DK_V3	DET score DK visit 3	27		60210	DET score by external nurse	0		148793	0	2020-07-02 18:57:33	2020-07-02 18:57:33	2020-07-17 12:54:17	UK001	1	1	2	2	0	0			0	0
16	CP288	86	Prod	1310	83	6024	26	Illingworth Research Group	UK001	World	15000	DET score DK visit 1	0	7132	DET_DK_V1	DET score DK visit 1	25		60268	DET score by external nurse	0		148871	0	2020-06-22 09:07:06	2020-06-22 09:07:06	2020-07-17 12:54:17	UK001	0	0			0	0			0	0
16	CP288	86	Prod	1310	83	6024	26	Illingworth Research Group	UK001	World	15001	DET score DK visit 2	0	7133	DET_DK_V2	DET score DK visit 2	26		60269	DET score by external nurse	0		148872	0	2020-06-22 09:53:30	2020-06-22 09:53:30	2020-07-17 12:54:17	UK001	1	1	1	1	0	0			0	0
16	CP288	86	Prod	1310	83	6024	26	Illingworth Research Group	UK001	World	15002	DET score DK visit 3	0	7134	DET_DK_V3	DET score DK visit 3	27		60270	DET score by external nurse	0		148873	0	2020-07-02 18:58:44	2020-07-02 18:58:44	2020-07-17 12:54:17	UK001	1	1	1	1	0	0			0	0
16	CP288	86	Prod	1311	83	6025	26	Illingworth Research Group	UK001	World	15031	DET score DK visit 1	0	7132	DET_DK_V1	DET score DK visit 1	25		60328	DET score by external nurse	0		148982	0	2020-06-22 09:07:35	2020-06-22 09:07:35	2020-07-17 12:54:17	UK001	1	1	2	2	1	1	1	1	0	0
16	CP288	86	Prod	1311	83	6025	26	Illingworth Research Group	UK001	World	15032	DET score DK visit 2	0	7133	DET_DK_V2	DET score DK visit 2	26		60329	DET score by external nurse	0		148983	0	2020-06-22 09:53:55	2020-06-22 09:53:55	2020-07-17 12:54:17	UK001	1	1	2	2	1	1	1	1	0	0
16	CP288	86	Prod	1311	83	6025	26	Illingworth Research Group	UK001	World	15033	DET score DK visit 3	0	7134	DET_DK_V3	DET score DK visit 3	27		60330	DET score by external nurse	0		148984	0	2020-07-02 18:59:46	2020-07-02 18:59:46	2020-07-17 12:54:17	UK001	1	1	1	1	0	0			0	0
16	CP288	86	Prod	1340	78	2016	22	Universitätsklinikum Schleswig-Holstein	DE001	World	15642	DET score DK visit 1	0	7256	DET_DK_V1	DET score DK visit 1	25		62202	DET score by external nurse	0		151625	0	2020-06-13 14:22:31	2020-06-13 14:22:31	2020-07-17 12:54:17	DE001	1	1	2	2	1	1	2	2	0	0
16	CP288	86	Prod	1340	78	2016	22	Universitätsklinikum Schleswig-Holstein	DE001	World	15643	DET score DK visit 2	0	7257	DET_DK_V2	DET score DK visit 2	26		62203	DET score by external nurse	0		151626	0	2020-06-13 14:32:26	2020-06-13 14:32:26	2020-07-17 12:54:17	DE001	1	1	1	1	0	0			0	0
16	CP288	86	Prod	1340	78	2016	22	Universitätsklinikum Schleswig-Holstein	DE001	World	15644	DET score DK visit 3	0	7258	DET_DK_V3	DET score DK visit 3	27		62204	DET score by external nurse	0		151627	0	2020-06-13 14:38:30	2020-06-13 14:38:30	2020-07-17 12:54:17	DE001	1	1	2	2	1	1	2	2	0	0
16	CP288	86	Prod	1341	78	2017	22	Universitätsklinikum Schleswig-Holstein	DE001	World	15673	DET score DK visit 1	0	7256	DET_DK_V1	DET score DK visit 1	25		62262	DET score by external nurse	0		151705	0	2020-06-13 14:23:01	2020-06-13 14:23:01	2020-07-17 12:54:17	DE001	0	0			0	0			0	0
16	CP288	86	Prod	1341	78	2017	22	Universitätsklinikum Schleswig-Holstein	DE001	World	15674	DET score DK visit 2	0	7257	DET_DK_V2	DET score DK visit 2	26		62263	DET score by external nurse	0		151706	0	2020-06-13 14:33:02	2020-06-13 14:33:02	2020-07-17 12:54:17	DE001	1	1	2	2	1	1	1	1	0	0
16	CP288	86	Prod	1342	78	2018	22	Universitätsklinikum Schleswig-Holstein	DE001	World	15704	DET score DK visit 1	0	7256	DET_DK_V1	DET score DK visit 1	25		62322	DET score by external nurse	0		151816	0	2020-06-13 14:23:36	2020-06-13 14:23:36	2020-07-17 12:54:17	DE001	2	2	1	1	0	0			0	0
16	CP288	86	Prod	1343	78	2019	22	Universitätsklinikum Schleswig-Holstein	DE001	World	15732	DET score CA visit 1	0	7253	DET_CA_V1	DET score CA visit 1	22		62379	DET score by external nurse	0		151893	0	2020-06-12 09:46:29	2020-07-14 16:13:41	2020-07-17 12:54:17	DE001
16	CP288	86	Prod	1343	78	2019	22	Universitätsklinikum Schleswig-Holstein	DE001	World	15735	DET score DK visit 1	0	7256	DET_DK_V1	DET score DK visit 1	25		62382	DET score by external nurse	0		151896	0	2020-06-13 14:24:12	2020-06-13 14:24:12	2020-07-17 12:54:17	DE001	1	1	2	2	1	1	1	1	1	1	1	1	7	7
16	CP288	86	Prod	1343	78	2019	22	Universitätsklinikum Schleswig-Holstein	DE001	World	15736	DET score DK visit 2	0	7257	DET_DK_V2	DET score DK visit 2	26		62383	DET score by external nurse	0		151897	0	2020-06-13 14:33:37	2020-06-13 14:33:37	2020-07-17 12:54:17	DE001	1	1	2	2	1	1	1	1	0	0
16	CP288	86	Prod	1343	78	2019	22	Universitätsklinikum Schleswig-Holstein	DE001	World	15737	DET score DK visit 3	0	7258	DET_DK_V3	DET score DK visit 3	27		62384	DET score by external nurse	0		151898	0	2020-06-13 14:37:59	2020-06-13 14:37:59	2020-07-17 12:54:17	DE001	1	1	1	1	0	0			0	0
16	CP288	86	Prod	1344	78	2020	22	Universitätsklinikum Schleswig-Holstein	DE001	World	15766	DET score DK visit 1	0	7256	DET_DK_V1	DET score DK visit 1	25		62442	DET score by external nurse	0		151945	0	2020-06-13 14:25:10	2020-06-13 14:25:10	2020-07-17 12:54:17	DE001	3	3	2	2	2	2	2	2	0	0
16	CP288	86	Prod	1344	78	2020	22	Universitätsklinikum Schleswig-Holstein	DE001	World	15767	DET score DK visit 2	0	7257	DET_DK_V2	DET score DK visit 2	26		62443	DET score by external nurse	0		151946	0	2020-06-13 14:34:11	2020-06-13 14:34:11	2020-07-17 12:54:17	DE001	3	3	2	2	1	1	1	1	0	0
16	CP288	86	Prod	1344	78	2020	22	Universitätsklinikum Schleswig-Holstein	DE001	World	15768	DET score DK visit 3	0	7258	DET_DK_V3	DET score DK visit 3	27		62444	DET score by external nurse	0		151947	0	2020-06-13 14:37:29	2020-06-13 14:37:29	2020-07-17 12:54:17	DE001	3	3	2	2	2	2	2	2	0	0
16	CP288	86	Prod	1345	82	1016	25	NO001	NO001	World	15797	DET score DK visit 1	0	7256	DET_DK_V1	DET score DK visit 1	25		62502	DET score by external nurse	0		152025	0	2020-06-15 14:40:18	2020-06-15 14:40:18	2020-07-17 12:54:17	NO001	1	1	2	2	1	1	1	1	0	0
16	CP288	86	Prod	1345	82	1016	25	NO001	NO001	World	15798	DET score DK visit 2	0	7257	DET_DK_V2	DET score DK visit 2	26		62503	DET score by external nurse	0		152026	0	2020-06-15 14:46:56	2020-06-15 14:46:56	2020-07-17 12:54:17	NO001	1	1	2	2	1	1	1	1	0	0
16	CP288	86	Prod	1345	82	1016	25	NO001	NO001	World	15799	DET score DK visit 3	0	7258	DET_DK_V3	DET score DK visit 3	27		62504	DET score by external nurse	0		152027	0	2020-06-15 14:49:24	2020-06-15 14:49:24	2020-07-17 12:54:17	NO001	1	1	2	2	1	1	1	1	0	0
16	CP288	86	Prod	1346	82	1017	25	NO001	NO001	World	15828	DET score DK visit 1	0	7256	DET_DK_V1	DET score DK visit 1	25		62562	DET score by external nurse	0		152105	0	2020-06-15 14:40:43	2020-06-15 14:40:43	2020-07-17 12:54:17	NO001	1	1	2	2	1	1	2	2	0	0
16	CP288	86	Prod	1346	82	1017	25	NO001	NO001	World	15829	DET score DK visit 2	0	7257	DET_DK_V2	DET score DK visit 2	26		62563	DET score by external nurse	0		152106	0	2020-06-15 14:47:33	2020-07-02 18:52:45	2020-07-17 12:54:17	NO001
16	CP288	86	Prod	1347	82	1018	25	NO001	NO001	World	15859	DET score DK visit 1	0	7256	DET_DK_V1	DET score DK visit 1	25		62622	DET score by external nurse	0		152185	0	2020-06-15 14:41:12	2020-06-15 14:41:12	2020-07-17 12:54:17	NO001	1	1	2	2	0	0			1	1	1	1
16	CP288	86	Prod	1347	82	1018	25	NO001	NO001	World	15860	DET score DK visit 2	0	7257	DET_DK_V2	DET score DK visit 2	26		62623	DET score by external nurse	0		152186	0	2020-07-03 19:27:59	2020-07-03 19:27:59	2020-07-17 12:54:17	NO001	1	1	2	2	0	0			1	1	1	1
16	CP288	86	Prod	1348	82	1019	25	NO001	NO001	World	15890	DET score DK visit 1	0	7256	DET_DK_V1	DET score DK visit 1	25		62682	DET score by external nurse	0		152265	0	2020-06-15 14:41:41	2020-06-15 14:41:41	2020-07-17 12:54:17	NO001	1	1	2	2	1	1	1	1	0	0
16	CP288	86	Prod	1349	82	1020	25	NO001	NO001	World	15921	DET score DK visit 1	0	7256	DET_DK_V1	DET score DK visit 1	25		62742	DET score by external nurse	0		152345	0	2020-06-15 14:42:05	2020-06-15 14:42:05	2020-07-17 12:54:17	NO001	1	1	2	2	1	1	1	1	0	0
16	CP288	86	Prod	1358	78	2021	22	Universitätsklinikum Schleswig-Holstein	DE001	World	16055	DET score DK visit 1	0	7256	DET_DK_V1	DET score DK visit 1	25		63514	DET score by external nurse	0		153879	0	2020-07-02 18:22:08	2020-07-02 18:22:08	2020-07-17 12:54:17	DE001	0	0			0	0			0	0
16	CP288	86	Prod	1358	78	2021	22	Universitätsklinikum Schleswig-Holstein	DE001	World	16056	DET score DK visit 2	0	7257	DET_DK_V2	DET score DK visit 2	26		63515	DET score by external nurse	0		153880	0	2020-06-13 14:34:42	2020-06-13 14:34:42	2020-07-17 12:54:17	DE001	1	1	1	1					0	0
16	CP288	86	Prod	1358	78	2021	22	Universitätsklinikum Schleswig-Holstein	DE001	World	16057	DET score DK visit 3	0	7258	DET_DK_V3	DET score DK visit 3	27		63516	DET score by external nurse	0		153881	0	2020-07-02 18:23:38	2020-07-02 18:23:38	2020-07-17 12:54:17	DE001	2	2	1	1	0	0			0	0
16	CP288	86	Prod	1359	78	2022	22	Universitätsklinikum Schleswig-Holstein	DE001	World	16087	DET score DK visit 2	0	7257	DET_DK_V2	DET score DK visit 2	26		63575	DET score by external nurse	0		153960	0	2020-06-13 14:35:18	2020-06-13 14:35:18	2020-07-17 12:54:17	DE001	0	0			0	0			0	0
16	CP288	86	Prod	1359	78	2022	22	Universitätsklinikum Schleswig-Holstein	DE001	World	16088	DET score DK visit 3	0	7258	DET_DK_V3	DET score DK visit 3	27		63576	DET score by external nurse	0		153961	0	2020-06-13 14:36:03	2020-06-13 14:36:03	2020-07-17 12:54:17	DE001	0	0			0	0			0	0
16	CP288	86	Prod	1360	78	2023	22	Universitätsklinikum Schleswig-Holstein	DE001	World	16119	DET score DK visit 3	0	7258	DET_DK_V3	DET score DK visit 3	27		63636	DET score by external nurse	0		154072	0	2020-06-13 14:36:33	2020-06-13 14:36:33	2020-07-17 12:54:17	DE001	1	1	2	2	1	1	1	1	0	0
16	CP288	86	Prod	1361	80	2084	24	Sanitätshaus Fürst GmbH	DE003	World	16148	DET score DK visit 1	0	7256	DET_DK_V1	DET score DK visit 1	25		63694	DET score by external nurse	0		154119	0	2020-06-15 11:28:19	2020-06-15 11:28:19	2020-07-17 12:54:17	DE003	1	1	2	2	0	0			1	1	1	1
16	CP288	86	Prod	1361	80	2084	24	Sanitätshaus Fürst GmbH	DE003	World	16149	DET score DK visit 2	0	7257	DET_DK_V2	DET score DK visit 2	26		63695	DET score by external nurse	0		154120	0	2020-06-15 11:40:58	2020-06-15 11:40:58	2020-07-17 12:54:17	DE003	2	2	2	2	1	1	1	1	0	0
16	CP288	86	Prod	1361	80	2084	24	Sanitätshaus Fürst GmbH	DE003	World	16150	DET score DK visit 3	0	7258	DET_DK_V3	DET score DK visit 3	27		63696	DET score by external nurse	0		154121	0	2020-06-15 14:30:51	2020-06-15 14:30:51	2020-07-17 12:54:17	DE003	1	1	2	2	1	1	1	1	0	0
16	CP288	86	Prod	1362	80	2085	24	Sanitätshaus Fürst GmbH	DE003	World	16179	DET score DK visit 1	0	7256	DET_DK_V1	DET score DK visit 1	25		63754	DET score by external nurse	0		154199	0	2020-07-02 18:31:55	2020-07-02 18:31:55	2020-07-17 12:54:17	DE003	1	1	2	2	1	1	2	2	1	1	1	1	8	8
16	CP288	86	Prod	1362	80	2085	24	Sanitätshaus Fürst GmbH	DE003	World	16180	DET score DK visit 2	0	7257	DET_DK_V2	DET score DK visit 2	26		63755	DET score by external nurse	0		154200	0	2020-06-15 11:41:26	2020-06-15 11:41:26	2020-07-17 12:54:17	DE003	1	1	2	2	1	1	1	1	1	1	1	1	7	7
16	CP288	86	Prod	1362	80	2085	24	Sanitätshaus Fürst GmbH	DE003	World	16181	DET score DK visit 3	0	7258	DET_DK_V3	DET score DK visit 3	27		63756	DET score by external nurse	0		154201	0	2020-06-15 14:31:15	2020-06-15 14:31:15	2020-07-17 12:54:17	DE003	2	2	1	1	0	0			0	0
16	CP288	86	Prod	1402	82	1027	25	NO001	NO001	World	16784	DET score DK visit 2	0	7477	DET_DK_V2	DET score DK visit 2	26		66113	DET score by external nurse	0		159452	0	2020-06-22 10:06:10	2020-06-22 10:06:10	2020-07-17 12:54:17	NO001	0	0			0	0			0	0
16	CP288	86	Prod	1402	82	1027	25	NO001	NO001	World	16785	DET score DK visit 3	0	7478	DET_DK_V3	DET score DK visit 3	27		66114	DET score by external nurse	0		159453	0	2020-07-15 08:14:03	2020-07-15 08:14:03	2020-07-17 12:54:17	NO001	0	0			0	0			0	0
16	CP288	86	Prod	1402	82	1027	25	NO001	NO001	World	16788	DET score final visit 3	0	7481	DET_ALL_V3	DET score final visit 3	30		66117	DET score by external nurse	0		159456	0	2020-07-02 18:43:36	2020-07-14 15:54:58	2020-07-17 12:54:17	NO001
16	CP288	86	Prod	1403	82	1028	25	NO001	NO001	World	16815	DET score DK visit 2	0	7477	DET_DK_V2	DET score DK visit 2	26		66173	DET score by external nurse	0		159532	0	2020-06-22 10:06:40	2020-06-22 10:06:40	2020-07-17 12:54:17	NO001	1	1	2	2	1	1	1	1	0	0
16	CP288	86	Prod	1403	82	1028	25	NO001	NO001	World	16816	DET score DK visit 3	0	7478	DET_DK_V3	DET score DK visit 3	27		66174	DET score by external nurse	0		159533	0	2020-07-15 08:01:43	2020-07-15 08:01:43	2020-07-17 12:54:17	NO001	1	1	2	2	1	1	1	1	0	0
16	CP288	86	Prod	1403	82	1028	25	NO001	NO001	World	16819	DET score final visit 3	0	7481	DET_ALL_V3	DET score final visit 3	30		66177	DET score by external nurse	0		159536	0	2020-07-02 18:44:17	2020-07-14 15:58:52	2020-07-17 12:54:17	NO001
16	CP288	86	Prod	1404	82	1029	25	NO001	NO001	World	16847	DET score DK visit 3	0	7478	DET_DK_V3	DET score DK visit 3	27		66234	DET score by external nurse	0		159644	0	2020-06-22 10:07:14	2020-06-22 10:07:14	2020-07-17 12:54:17	NO001	1	1	1	1	0	0			0	0
16	CP288	86	Prod	1423	80	2087	24	Sanitätshaus Fürst GmbH	DE003	World	17169	DET score DK visit 2	0	7477	DET_DK_V2	DET score DK visit 2	26		67657	DET score by external nurse	0		162115	0	2020-07-02 18:33:17	2020-07-02 18:33:17	2020-07-17 12:54:17	DE003	2	2	1	1	0	0			0	0
16	CP288	86	Prod	1423	80	2087	24	Sanitätshaus Fürst GmbH	DE003	World	17170	DET score DK visit 3	0	7478	DET_DK_V3	DET score DK visit 3	27		67658	DET score by external nurse	0		162116	0	2020-07-15 08:06:23	2020-07-15 08:06:23	2020-07-17 12:54:17	DE003	2	2	1	1	0	0			0	0
