# Supplementary material for: Psychometric validation of the Ostomy Skin Tool 2.0
Source: PeerJ. 2023 Dec 18;11:e16685. doi: 10.7717/peerj.16685 (PMC10734405; doi:10.7717/peerj.16685)
Supplement: Supplemental Information 9 [file peerj-11-16685-s009.xlsx]

## Sheet: bpcng
projectid	project	studyid	environmentName	subjectId	StudySiteId	Subject	siteid	Site	SiteNumber	SiteGroup	instanceId	InstanceName	InstanceRepeatNumber	folderid	Folder	FolderName	FolderSeq	TargetDays	DataPageId	DataPageName	PageRepeatNumber	RecordDate	RecordId	RecordPosition	MinCreated	MaxUpdated	SaveTS	StudyEnvSiteNumber	PRODSEQUENCE	PRODSEQUENCE_RAW	PHOTO_SKIN	PHOTO_SKIN_RAW	PHT0101	PHT01DTC	PHT01DTC_RAW	PHT01DTC_INT	PHT01DTC_YYYY	PHT01DTC_MM	PHT01DTC_DD	PHOTO_PRODUCT	PHOTO_PRODUCT_RAW	PROD_PHOTO	PHT02DTC	PHT02DTC_RAW	PHT02DTC_INT	PHT02DTC_YYYY	PHT02DTC_MM	PHT02DTC_DD	MULTI_CNG_HEADER
16	CP288	86	Prod	1093	78	2001	22	Universitätsklinikum Schleswig-Holstein	DE001	World	9113	Product change TP1	0	5849	APP_PRODUCTCHANGE_TP_1	Product change TP1	17		47754	Baseplate change TP 1	0		131028	1	2020-01-31 12:00:04	2020-01-31 12:00:04	2020-07-17 12:52:32	DE001	1	1	1	1	7E0CC0BB-E23C-4152-95F5-321D8F46984B.JPEG	2020-01-31 12:47:00	2020-01-31 12:47:00	2020-01-31 12:47:00	2020	1	31	1	1	3D1014DA-979F-4305-B3B5-0010C56191B9.JPEG	2020-01-31 12:49:00	2020-01-31 12:49:00	2020-01-31 12:49:00	2020	1	31
16	CP288	86	Prod	1093	78	2001	22	Universitätsklinikum Schleswig-Holstein	DE001	World	9116	Product change TP2	0	5852	APP_PRODUCTCHANGE_TP_2	Product change TP2	19		47755	Baseplate change TP 1	0		131030	1	2020-03-12 00:00:04	2020-03-12 00:00:04	2020-07-17 12:52:32	DE001	29	29	1	1	2EDA61BA-534C-41AD-BB66-CF0F3EBCB766.JPEG	2020-03-12	2020-03-12	2020-03-12	2020	3	12	1	1	F460F466-73B4-4CAA-AA35-6A1E2C87C7C9.JPEG	2020-03-12	2020-03-12	2020-03-12	2020	3	12
16	CP288	86	Prod	1093	78	2001	22	Universitätsklinikum Schleswig-Holstein	DE001	World	9113	Product change TP1	0	5849	APP_PRODUCTCHANGE_TP_1	Product change TP1	17		47754	Baseplate change TP 1	0		144402	2	2020-02-01 07:00:07	2020-02-01 07:00:07	2020-07-17 12:52:32	DE001	2	2	1	1	96A00319-B47F-48C7-85FB-468138DDCC29.JPEG	2020-02-01 07:31:00	2020-02-01 07:31:00	2020-02-01 07:31:00	2020	2	1	1	1	878C336C-B249-436F-B241-48654FF2A3F1.JPEG	2020-02-01 07:31:00	2020-02-01 07:31:00	2020-02-01 07:31:00	2020	2	1
16	CP288	86	Prod	1093	78	2001	22	Universitätsklinikum Schleswig-Holstein	DE001	World	9113	Product change TP1	0	5849	APP_PRODUCTCHANGE_TP_1	Product change TP1	17		47754	Baseplate change TP 1	0		144790	3	2020-02-05 00:00:04	2020-02-05 00:00:04	2020-07-17 12:52:32	DE001	3	3	1	1	E85D80A1-19EA-4B2B-9C1A-7FE4A031CC4C.JPEG	2020-02-02 21:57:00	2020-02-02 21:57:00	2020-02-02 21:57:00	2020	2	2	1	1	BF26AE08-4A91-4650-9C0B-AE1649651855.JPEG	2020-02-02 21:57:00	2020-02-02 21:57:00	2020-02-02 21:57:00	2020	2	2
16	CP288	86	Prod	1093	78	2001	22	Universitätsklinikum Schleswig-Holstein	DE001	World	9113	Product change TP1	0	5849	APP_PRODUCTCHANGE_TP_1	Product change TP1	17		47754	Baseplate change TP 1	0		144793	4	2020-02-05 00:00:11	2020-02-05 00:00:11	2020-07-17 12:52:32	DE001	4	4	1	1	90752C2A-B58A-4967-8A95-49D7BAB9CCC1.JPEG	2020-02-05 00:05:00	2020-02-05 00:05:00	2020-02-05 00:05:00	2020	2	5	1	1	355038F1-8FDB-419B-82FC-1158BF343B1C.JPEG	2020-02-05 00:06:00	2020-02-05 00:06:00	2020-02-05 00:06:00	2020	2	5
16	CP288	86	Prod	1093	78	2001	22	Universitätsklinikum Schleswig-Holstein	DE001	World	9113	Product change TP1	0	5849	APP_PRODUCTCHANGE_TP_1	Product change TP1	17		47754	Baseplate change TP 1	0		144915	5	2020-02-05 23:00:07	2020-02-05 23:00:07	2020-07-17 12:52:32	DE001	5	5	1	1	3F9E1CF7-A467-403C-92D3-956B08ABF217.JPEG	2020-02-05 23:29:00	2020-02-05 23:29:00	2020-02-05 23:29:00	2020	2	5	1	1	5337ACF5-2F39-40CF-94B5-F4F3F8B417D4.JPEG	2020-02-05 23:30:00	2020-02-05 23:30:00	2020-02-05 23:30:00	2020	2	5
16	CP288	86	Prod	1093	78	2001	22	Universitätsklinikum Schleswig-Holstein	DE001	World	9113	Product change TP1	0	5849	APP_PRODUCTCHANGE_TP_1	Product change TP1	17		47754	Baseplate change TP 1	0		145946	6	2020-02-06 13:00:09	2020-02-06 13:00:09	2020-07-17 12:52:32	DE001	6	6	1	1	861C77AF-AD8B-42D9-BC62-9B36789285BA.JPEG	2020-02-06 13:47:00	2020-02-06 13:47:00	2020-02-06 13:47:00	2020	2	6	1	1	88E7F012-DB70-4E80-95EE-285EB28BE47B.JPEG	2020-02-06 13:48:00	2020-02-06 13:48:00	2020-02-06 13:48:00	2020	2	6
16	CP288	86	Prod	1093	78	2001	22	Universitätsklinikum Schleswig-Holstein	DE001	World	9113	Product change TP1	0	5849	APP_PRODUCTCHANGE_TP_1	Product change TP1	17		47754	Baseplate change TP 1	0		146006	7	2020-02-07 23:00:08	2020-02-07 23:00:08	2020-07-17 12:52:32	DE001	7	7	1	1	86FAD36B-697F-4409-8682-EAB4E29A30B0.JPEG	2020-02-07 23:38:00	2020-02-07 23:38:00	2020-02-07 23:38:00	2020	2	7	1	1	1E3312C7-F277-4DA7-BBDC-7AF2D63604F7.JPEG	2020-02-07 23:39:00	2020-02-07 23:39:00	2020-02-07 23:39:00	2020	2	7
16	CP288	86	Prod	1093	78	2001	22	Universitätsklinikum Schleswig-Holstein	DE001	World	9113	Product change TP1	0	5849	APP_PRODUCTCHANGE_TP_1	Product change TP1	17		47754	Baseplate change TP 1	0		146056	8	2020-02-09 23:00:07	2020-02-09 23:00:07	2020-07-17 12:52:32	DE001	8	8	1	1	6FE7BE64-4B5D-4852-A16B-1E36D9839AE8.JPEG	2020-02-09 23:25:00	2020-02-09 23:25:00	2020-02-09 23:25:00	2020	2	9	1	1	F974E5C6-9E29-4A0A-BB39-E38F5685494E.JPEG	2020-02-09 23:25:00	2020-02-09 23:25:00	2020-02-09 23:25:00	2020	2	9
16	CP288	86	Prod	1093	78	2001	22	Universitätsklinikum Schleswig-Holstein	DE001	World	9113	Product change TP1	0	5849	APP_PRODUCTCHANGE_TP_1	Product change TP1	17		47754	Baseplate change TP 1	0		146170	9	2020-02-12 00:00:07	2020-02-12 00:00:07	2020-07-17 12:52:32	DE001	9	9	1	1	EF22B725-61C4-4AEF-9E19-0B64AA5A8332.JPEG	2020-02-12 00:51:00	2020-02-12 00:51:00	2020-02-12 00:51:00	2020	2	12	1	1	9FE7962F-7EA6-42C0-94D2-3D56A4B56474.JPEG	2020-02-12 00:51:00	2020-02-12 00:51:00	2020-02-12 00:51:00	2020	2	12
16	CP288	86	Prod	1093	78	2001	22	Universitätsklinikum Schleswig-Holstein	DE001	World	9113	Product change TP1	0	5849	APP_PRODUCTCHANGE_TP_1	Product change TP1	17		47754	Baseplate change TP 1	0		146488	10	2020-02-14 17:00:04	2020-02-14 17:00:04	2020-07-17 12:52:32	DE001	10	10	1	1	C23AAE29-081F-4AD7-89A9-B7B9B88A0202.JPEG	2020-02-14 17:43:00	2020-02-14 17:43:00	2020-02-14 17:43:00	2020	2	14	1	1	3D513CD2-9210-4CDA-87A2-BF622252AA9E.JPEG	2020-02-14 17:43:00	2020-02-14 17:43:00	2020-02-14 17:43:00	2020	2	14
16	CP288	86	Prod	1093	78	2001	22	Universitätsklinikum Schleswig-Holstein	DE001	World	9113	Product change TP1	0	5849	APP_PRODUCTCHANGE_TP_1	Product change TP1	17		47754	Baseplate change TP 1	0		146580	11	2020-02-17 00:00:04	2020-02-17 00:00:04	2020-07-17 12:52:32	DE001	11	11	1	1	584320D4-8DF5-4013-866A-006C67EDDCE6.JPEG	2020-02-16 23:59:00	2020-02-16 23:59:00	2020-02-16 23:59:00	2020	2	16	1	1	8C29FB60-759C-43F6-BD49-4A43AEB0480C.JPEG	2020-02-17	2020-02-17	2020-02-17	2020	2	17
16	CP288	86	Prod	1093	78	2001	22	Universitätsklinikum Schleswig-Holstein	DE001	World	9113	Product change TP1	0	5849	APP_PRODUCTCHANGE_TP_1	Product change TP1	17		47754	Baseplate change TP 1	0		149645	12	2020-02-19 00:00:04	2020-02-19 00:00:04	2020-07-17 12:52:32	DE001	12	12	1	1	5513EB80-6A85-47CB-84EA-E11AF7F46BC9.JPEG	2020-02-19 00:01:00	2020-02-19 00:01:00	2020-02-19 00:01:00	2020	2	19	1	1	6B84D660-42A4-48E4-B180-26B6D2121663.JPEG	2020-02-19 00:02:00	2020-02-19 00:02:00	2020-02-19 00:02:00	2020	2	19
16	CP288	86	Prod	1093	78	2001	22	Universitätsklinikum Schleswig-Holstein	DE001	World	9113	Product change TP1	0	5849	APP_PRODUCTCHANGE_TP_1	Product change TP1	17		47754	Baseplate change TP 1	0		150469	13	2020-02-19 22:00:09	2020-02-19 22:00:09	2020-07-17 12:52:32	DE001	13	13	1	1	CB60C0E1-33B2-49F8-8FC3-2CBF9E4D0541.JPEG	2020-02-19 22:34:00	2020-02-19 22:34:00	2020-02-19 22:34:00	2020	2	19	1	1	741CE114-3F08-4145-B84F-2D91E8B062CE.JPEG	2020-02-19 22:35:00	2020-02-19 22:35:00	2020-02-19 22:35:00	2020	2	19
16	CP288	86	Prod	1093	78	2001	22	Universitätsklinikum Schleswig-Holstein	DE001	World	9113	Product change TP1	0	5849	APP_PRODUCTCHANGE_TP_1	Product change TP1	17		47754	Baseplate change TP 1	0		152543	14	2020-02-20 19:00:09	2020-02-20 19:00:09	2020-07-17 12:52:32	DE001	14	14	1	1	B6AA6E94-EB0A-4B48-A814-BFC5FA034253.JPEG	2020-02-20 19:14:00	2020-02-20 19:14:00	2020-02-20 19:14:00	2020	2	20	1	1	DA929311-385D-47AC-AE84-69DE3A98EA5E.JPEG	2020-02-20 19:14:00	2020-02-20 19:14:00	2020-02-20 19:14:00	2020	2	20
16	CP288	86	Prod	1093	78	2001	22	Universitätsklinikum Schleswig-Holstein	DE001	World	9113	Product change TP1	0	5849	APP_PRODUCTCHANGE_TP_1	Product change TP1	17		47754	Baseplate change TP 1	0		152595	15	2020-02-21 22:00:07	2020-02-21 22:00:07	2020-07-17 12:52:32	DE001	15	15	1	1	E25B247E-30D1-481A-ACB9-E6637A1FCAA2.JPEG	2020-02-21 22:12:00	2020-02-21 22:12:00	2020-02-21 22:12:00	2020	2	21	1	1	9645A416-3FD0-4899-82B7-8F8F2E47CC7D.JPEG	2020-02-21 22:13:00	2020-02-21 22:13:00	2020-02-21 22:13:00	2020	2	21
16	CP288	86	Prod	1093	78	2001	22	Universitätsklinikum Schleswig-Holstein	DE001	World	9113	Product change TP1	0	5849	APP_PRODUCTCHANGE_TP_1	Product change TP1	17		47754	Baseplate change TP 1	0		152812	16	2020-02-23 22:00:04	2020-02-23 22:00:04	2020-07-17 12:52:32	DE001	16	16	1	1	5FE41776-8D4A-4E8C-A08B-837F9BA77149.JPEG	2020-02-23 22:54:00	2020-02-23 22:54:00	2020-02-23 22:54:00	2020	2	23	1	1	AE490BC8-A5BA-4353-91AD-48702B1B145B.JPEG	2020-02-23 22:54:00	2020-02-23 22:54:00	2020-02-23 22:54:00	2020	2	23
16	CP288	86	Prod	1093	78	2001	22	Universitätsklinikum Schleswig-Holstein	DE001	World	9113	Product change TP1	0	5849	APP_PRODUCTCHANGE_TP_1	Product change TP1	17		47754	Baseplate change TP 1	0		153185	17	2020-02-24 21:00:10	2020-02-24 21:00:10	2020-07-17 12:52:32	DE001	17	17	1	1	D02A236A-7694-4D21-8462-AE3B3FFC8E65.JPEG	2020-02-24 21:42:00	2020-02-24 21:42:00	2020-02-24 21:42:00	2020	2	24	1	1	CE20791E-84A7-4039-BD51-7053FEDE7DED.JPEG	2020-02-24 21:42:00	2020-02-24 21:42:00	2020-02-24 21:42:00	2020	2	24
16	CP288	86	Prod	1093	78	2001	22	Universitätsklinikum Schleswig-Holstein	DE001	World	9113	Product change TP1	0	5849	APP_PRODUCTCHANGE_TP_1	Product change TP1	17		47754	Baseplate change TP 1	0		154314	18	2020-02-26 08:00:05	2020-02-26 08:00:05	2020-07-17 12:52:32	DE001	18	18	1	1	4DB38CD5-2DEB-47D8-B422-2AB834F79E3B.JPEG	2020-02-26 08:56:00	2020-02-26 08:56:00	2020-02-26 08:56:00	2020	2	26	1	1	30452353-B240-4AF1-9446-6877F8BD2D2F.JPEG	2020-02-26 08:57:00	2020-02-26 08:57:00	2020-02-26 08:57:00	2020	2	26
16	CP288	86	Prod	1093	78	2001	22	Universitätsklinikum Schleswig-Holstein	DE001	World	9113	Product change TP1	0	5849	APP_PRODUCTCHANGE_TP_1	Product change TP1	17		47754	Baseplate change TP 1	0		154668	19	2020-02-28 02:00:06	2020-02-28 02:00:06	2020-07-17 12:52:32	DE001	19	19	1	1	989EADBA-490A-4CB1-B944-BD64531EC929.JPEG	2020-02-28 02:07:00	2020-02-28 02:07:00	2020-02-28 02:07:00	2020	2	28	1	1	5180AADF-0CCC-4FA0-A478-A9A6F7FC4314.JPEG	2020-02-28 02:08:00	2020-02-28 02:08:00	2020-02-28 02:08:00	2020	2	28
16	CP288	86	Prod	1093	78	2001	22	Universitätsklinikum Schleswig-Holstein	DE001	World	9113	Product change TP1	0	5849	APP_PRODUCTCHANGE_TP_1	Product change TP1	17		47754	Baseplate change TP 1	0		154834	20	2020-02-29 18:00:06	2020-02-29 18:00:06	2020-07-17 12:52:32	DE001	20	20	1	1	4DEB0559-BA08-4DF6-982A-61D300E1F07A.JPEG	2020-02-29 18:39:00	2020-02-29 18:39:00	2020-02-29 18:39:00	2020	2	29	1	1	4E523372-B3AC-43FD-87C0-9E5B18799366.JPEG	2020-02-29 18:39:00	2020-02-29 18:39:00	2020-02-29 18:39:00	2020	2	29
16	CP288	86	Prod	1093	78	2001	22	Universitätsklinikum Schleswig-Holstein	DE001	World	9113	Product change TP1	0	5849	APP_PRODUCTCHANGE_TP_1	Product change TP1	17		47754	Baseplate change TP 1	0		156404	21	2020-03-03 09:00:07	2020-03-03 09:00:07	2020-07-17 12:52:32	DE001	21	21	1	1	079ABDF0-77B3-4F4A-AC4B-874B507D3E44.JPEG	2020-03-03 09:01:00	2020-03-03 09:01:00	2020-03-03 09:01:00	2020	3	3	1	1	A9A87CAE-BEE6-4677-ACDA-CE7E43DF2485.JPEG	2020-03-03 09:02:00	2020-03-03 09:02:00	2020-03-03 09:02:00	2020	3	3
16	CP288	86	Prod	1093	78	2001	22	Universitätsklinikum Schleswig-Holstein	DE001	World	9113	Product change TP1	0	5849	APP_PRODUCTCHANGE_TP_1	Product change TP1	17		47754	Baseplate change TP 1	0		157807	22	2020-03-05 00:00:09	2020-03-05 00:00:09	2020-07-17 12:52:32	DE001	22	22	1	1	3C7E02A3-FA42-494C-816F-2EF7842E3F4B.JPEG	2020-03-05 00:02:00	2020-03-05 00:02:00	2020-03-05 00:02:00	2020	3	5	1	1	EFEF1685-4C85-4378-BC2F-E94C350A572D.JPEG	2020-03-05 00:02:00	2020-03-05 00:02:00	2020-03-05 00:02:00	2020	3	5
16	CP288	86	Prod	1093	78	2001	22	Universitätsklinikum Schleswig-Holstein	DE001	World	9113	Product change TP1	0	5849	APP_PRODUCTCHANGE_TP_1	Product change TP1	17		47754	Baseplate change TP 1	0		158026	23	2020-03-08 01:00:05	2020-03-08 01:00:05	2020-07-17 12:52:32	DE001	23	23	1	1	1A1C54E7-0356-4A59-B078-7C114D5E3BA9.JPEG	2020-03-06 22:44:00	2020-03-06 22:44:00	2020-03-06 22:44:00	2020	3	6	1	1	72FD01FE-FF4F-4602-BFF9-F790A6E63DA9.JPEG	2020-03-06 22:44:00	2020-03-06 22:44:00	2020-03-06 22:44:00	2020	3	6
16	CP288	86	Prod	1093	78	2001	22	Universitätsklinikum Schleswig-Holstein	DE001	World	9113	Product change TP1	0	5849	APP_PRODUCTCHANGE_TP_1	Product change TP1	17		47754	Baseplate change TP 1	0		158029	24	2020-03-08 01:00:13	2020-03-08 01:00:13	2020-07-17 12:52:32	DE001	24	24	1	1	1713C5D0-2761-44F8-B973-927BD47CFC8A.JPEG	2020-03-08 01:05:00	2020-03-08 01:05:00	2020-03-08 01:05:00	2020	3	8	1	1	D18D7FEB-1163-4008-AAA3-CEF047D36082.JPEG	2020-03-08 01:06:00	2020-03-08 01:06:00	2020-03-08 01:06:00	2020	3	8
16	CP288	86	Prod	1093	78	2001	22	Universitätsklinikum Schleswig-Holstein	DE001	World	9113	Product change TP1	0	5849	APP_PRODUCTCHANGE_TP_1	Product change TP1	17		47754	Baseplate change TP 1	0		158070	25	2020-03-08 15:00:09	2020-03-08 15:00:09	2020-07-17 12:52:32	DE001	25	25	1	1	5D439831-7B99-42EA-B21E-256C3D55569A.JPEG	2020-03-08 15:31:00	2020-03-08 15:31:00	2020-03-08 15:31:00	2020	3	8	1	1	CFA9F746-77E2-43F4-88FB-6640818267D5.JPEG	2020-03-08 15:31:00	2020-03-08 15:31:00	2020-03-08 15:31:00	2020	3	8
16	CP288	86	Prod	1093	78	2001	22	Universitätsklinikum Schleswig-Holstein	DE001	World	9113	Product change TP1	0	5849	APP_PRODUCTCHANGE_TP_1	Product change TP1	17		47754	Baseplate change TP 1	0		158277	26	2020-03-09 22:00:05	2020-03-09 22:00:05	2020-07-17 12:52:32	DE001	26	26	1	1	EE481B69-E827-4066-8B96-AA1FA7A2C1DF.JPEG	2020-03-09 22:48:00	2020-03-09 22:48:00	2020-03-09 22:48:00	2020	3	9	1	1	F456C85B-D3DB-4D00-B22D-C4D99386A339.JPEG	2020-03-09 22:48:00	2020-03-09 22:48:00	2020-03-09 22:48:00	2020	3	9
16	CP288	86	Prod	1093	78	2001	22	Universitätsklinikum Schleswig-Holstein	DE001	World	9113	Product change TP1	0	5849	APP_PRODUCTCHANGE_TP_1	Product change TP1	17		47754	Baseplate change TP 1	0		158367	27	2020-03-11 00:00:10	2020-03-11 00:00:10	2020-07-17 12:52:32	DE001	27	27	1	1	39ED10B0-9371-475F-8355-2E05AFF8B10D.JPEG	2020-03-11 00:52:00	2020-03-11 00:52:00	2020-03-11 00:52:00	2020	3	11	1	1	2EEC67CD-E00E-4B50-BC69-C6C53C36CDE5.JPEG	2020-03-11 00:52:00	2020-03-11 00:52:00	2020-03-11 00:52:00	2020	3	11
16	CP288	86	Prod	1093	78	2001	22	Universitätsklinikum Schleswig-Holstein	DE001	World	9116	Product change TP2	0	5852	APP_PRODUCTCHANGE_TP_2	Product change TP2	19		47755	Baseplate change TP 1	0		158864	2	2020-03-13 21:00:04	2020-03-13 21:00:04	2020-07-17 12:52:32	DE001	30	30	1	1	663D998D-76AC-4737-8A16-3965F525EFC8.JPEG	2020-03-13 21:49:00	2020-03-13 21:49:00	2020-03-13 21:49:00	2020	3	13	1	1	0341CA50-ABAB-43C3-9883-B59C8716DD59.JPEG	2020-03-13 21:49:00	2020-03-13 21:49:00	2020-03-13 21:49:00	2020	3	13
16	CP288	86	Prod	1093	78	2001	22	Universitätsklinikum Schleswig-Holstein	DE001	World	9116	Product change TP2	0	5852	APP_PRODUCTCHANGE_TP_2	Product change TP2	19		47755	Baseplate change TP 1	0		159305	3	2020-03-16 00:00:06	2020-03-16 00:00:06	2020-07-17 12:52:32	DE001	31	31	1	1	DF551D26-81E5-409F-97C1-076C7C6FCB99.JPEG	2020-03-16 00:24:00	2020-03-16 00:24:00	2020-03-16 00:24:00	2020	3	16	1	1	95AF8813-3ABA-44CE-BD4E-417B9DC6B658.JPEG	2020-03-16 00:24:00	2020-03-16 00:24:00	2020-03-16 00:24:00	2020	3	16
16	CP288	86	Prod	1093	78	2001	22	Universitätsklinikum Schleswig-Holstein	DE001	World	9116	Product change TP2	0	5852	APP_PRODUCTCHANGE_TP_2	Product change TP2	19		47755	Baseplate change TP 1	0		161650	4	2020-03-18 03:00:10	2020-03-18 03:00:10	2020-07-17 12:52:32	DE001	32	32	1	1	B70158A5-F9FC-438F-A834-4CEDEE063A57.JPEG	2020-03-18 03:15:00	2020-03-18 03:15:00	2020-03-18 03:15:00	2020	3	18	1	1	C1669406-01A8-48A1-BA60-D744193E2F11.JPEG	2020-03-18 03:15:00	2020-03-18 03:15:00	2020-03-18 03:15:00	2020	3	18
16	CP288	86	Prod	1093	78	2001	22	Universitätsklinikum Schleswig-Holstein	DE001	World	9116	Product change TP2	0	5852	APP_PRODUCTCHANGE_TP_2	Product change TP2	19		47755	Baseplate change TP 1	0		162267	5	2020-03-20 10:00:09	2020-03-20 10:00:09	2020-07-17 12:52:32	DE001	33	33	1	1	EEEE275D-23B7-4173-A326-E2BC6DA0DE3D.JPEG	2020-03-20 10:21:00	2020-03-20 10:21:00	2020-03-20 10:21:00	2020	3	20	1	1	4976ADFC-B1A2-457E-B378-B154517F4305.JPEG	2020-03-20 10:21:00	2020-03-20 10:21:00	2020-03-20 10:21:00	2020	3	20
16	CP288	86	Prod	1093	78	2001	22	Universitätsklinikum Schleswig-Holstein	DE001	World	9116	Product change TP2	0	5852	APP_PRODUCTCHANGE_TP_2	Product change TP2	19		47755	Baseplate change TP 1	0		163401	6	2020-03-24 01:00:09	2020-03-24 01:00:09	2020-07-17 12:52:32	DE001	34	34	1	1	C93BE4D4-09B5-47E5-A576-B166814CFDCF.JPEG	2020-03-24 01:04:00	2020-03-24 01:04:00	2020-03-24 01:04:00	2020	3	24	1	1	676460B9-FF35-4AAC-9E20-AFDDD9FED0DA.JPEG	2020-03-24 01:04:00	2020-03-24 01:04:00	2020-03-24 01:04:00	2020	3	24
16	CP288	86	Prod	1093	78	2001	22	Universitätsklinikum Schleswig-Holstein	DE001	World	9116	Product change TP2	0	5852	APP_PRODUCTCHANGE_TP_2	Product change TP2	19		47755	Baseplate change TP 1	0		164579	7	2020-03-28 12:00:04	2020-03-28 12:00:04	2020-07-17 12:52:32	DE001	35	35	1	1	97A3222A-61C1-40F9-96F6-CA4B0357AB09.JPEG	2020-03-28 12:45:00	2020-03-28 12:45:00	2020-03-28 12:45:00	2020	3	28	1	1	6BD4B691-12FF-4F25-970B-8FAC843F8B49.JPEG	2020-03-28 12:46:00	2020-03-28 12:46:00	2020-03-28 12:46:00	2020	3	28
16	CP288	86	Prod	1093	78	2001	22	Universitätsklinikum Schleswig-Holstein	DE001	World	9116	Product change TP2	0	5852	APP_PRODUCTCHANGE_TP_2	Product change TP2	19		47755	Baseplate change TP 1	0		168363	8	2020-04-01 21:00:06	2020-04-01 21:00:06	2020-07-17 12:52:32	DE001	36	36	1	1	C5F41193-7501-42FE-A77C-5B6EBFB8C3BE.JPEG	2020-04-01 22:40:00	2020-04-01 22:40:00	2020-04-01 22:40:00	2020	4	1	1	1	F28386E7-EE8E-41B3-97BA-5EF5038D1CEC.JPEG	2020-04-01 22:41:00	2020-04-01 22:41:00	2020-04-01 22:41:00	2020	4	1
16	CP288	86	Prod	1093	78	2001	22	Universitätsklinikum Schleswig-Holstein	DE001	World	9116	Product change TP2	0	5852	APP_PRODUCTCHANGE_TP_2	Product change TP2	19		47755	Baseplate change TP 1	0		168708	9	2020-04-04 22:00:04	2020-04-04 22:00:04	2020-07-17 12:52:32	DE001	37	37	1	1	DD8521CB-9AF7-428A-A4B9-297D0DBB2E86.JPEG	2020-04-04 23:08:00	2020-04-04 23:08:00	2020-04-04 23:08:00	2020	4	4	1	1	AC285F9B-AE5C-45B5-9388-7567FC7E2020.JPEG	2020-04-04 23:08:00	2020-04-04 23:08:00	2020-04-04 23:08:00	2020	4	4
16	CP288	86	Prod	1093	78	2001	22	Universitätsklinikum Schleswig-Holstein	DE001	World	9116	Product change TP2	0	5852	APP_PRODUCTCHANGE_TP_2	Product change TP2	19		47755	Baseplate change TP 1	0		168880	10	2020-04-06 13:00:02	2020-04-06 13:00:02	2020-07-17 12:52:32	DE001	38	38	1	1	171E55D8-D19D-46DA-894D-00A2DEA7E94C.JPEG	2020-04-06 14:07:00	2020-04-06 14:07:00	2020-04-06 14:07:00	2020	4	6	1	1	57B5FD40-5349-4EF8-BC24-6C1F697EECF3.JPEG	2020-04-06 14:08:00	2020-04-06 14:08:00	2020-04-06 14:08:00	2020	4	6
16	CP288	86	Prod	1093	78	2001	22	Universitätsklinikum Schleswig-Holstein	DE001	World	9116	Product change TP2	0	5852	APP_PRODUCTCHANGE_TP_2	Product change TP2	19		47755	Baseplate change TP 1	0		169421	11	2020-04-11 00:00:15	2020-04-11 00:00:15	2020-07-17 12:52:32	DE001	39	39	1	1	9BA45B93-4037-478D-8A2A-9A7F2999FAA3.JPEG	2020-04-11 01:30:00	2020-04-11 01:30:00	2020-04-11 01:30:00	2020	4	11	1	1	0D400C8C-DB9F-45B0-8355-78AD49D65141.JPEG	2020-04-11 01:30:00	2020-04-11 01:30:00	2020-04-11 01:30:00	2020	4	11
16	CP288	86	Prod	1093	78	2001	22	Universitätsklinikum Schleswig-Holstein	DE001	World	9116	Product change TP2	0	5852	APP_PRODUCTCHANGE_TP_2	Product change TP2	19		47755	Baseplate change TP 1	0		169475	12	2020-04-11 14:00:05	2020-04-11 14:00:05	2020-07-17 12:52:32	DE001	40	40	1	1	F121A84B-1815-4DB5-9566-689AB827883E.JPEG	2020-04-11 15:31:00	2020-04-11 15:31:00	2020-04-11 15:31:00	2020	4	11	1	1	45395A5F-D333-4C19-8B62-33CE7F6E97E6.JPEG	2020-04-11 15:31:00	2020-04-11 15:31:00	2020-04-11 15:31:00	2020	4	11
16	CP288	86	Prod	1093	78	2001	22	Universitätsklinikum Schleswig-Holstein	DE001	World	9116	Product change TP2	0	5852	APP_PRODUCTCHANGE_TP_2	Product change TP2	19		47755	Baseplate change TP 1	0		169726	13	2020-04-14 03:00:05	2020-04-14 03:00:05	2020-07-17 12:52:32	DE001	41	41	1	1	D5699432-D656-4BA6-A047-01D9BE548AB7.JPEG	2020-04-14 04:08:00	2020-04-14 04:08:00	2020-04-14 04:08:00	2020	4	14	1	1	D98426F5-3373-40B7-B5D0-029A1C6C3690.JPEG	2020-04-14 04:09:00	2020-04-14 04:09:00	2020-04-14 04:09:00	2020	4	14
16	CP288	86	Prod	1093	78	2001	22	Universitätsklinikum Schleswig-Holstein	DE001	World	9116	Product change TP2	0	5852	APP_PRODUCTCHANGE_TP_2	Product change TP2	19		47755	Baseplate change TP 1	0		170681	14	2020-04-17 08:00:09	2020-04-17 08:00:09	2020-07-17 12:52:32	DE001	42	42	1	1	7871D596-1732-4105-89A6-F0C0377C98EE.JPEG	2020-04-17 09:52:00	2020-04-17 09:52:00	2020-04-17 09:52:00	2020	4	17	1	1	61E4B5CE-5778-427E-8A4C-C404EEBF24B9.JPEG	2020-04-17 09:53:00	2020-04-17 09:53:00	2020-04-17 09:53:00	2020	4	17
16	CP288	86	Prod	1093	78	2001	22	Universitätsklinikum Schleswig-Holstein	DE001	World	9116	Product change TP2	0	5852	APP_PRODUCTCHANGE_TP_2	Product change TP2	19		47755	Baseplate change TP 1	0		171262	15	2020-04-20 01:00:05	2020-04-20 01:00:05	2020-07-17 12:52:32	DE001	43	43	1	1	B2FEE2A7-39DC-4DE7-92EA-AA6344A691A5.JPEG	2020-04-20 02:20:00	2020-04-20 02:20:00	2020-04-20 02:20:00	2020	4	20	1	1	33C8AC0D-6A6D-48A4-AE89-0CE902B00D10.JPEG	2020-04-20 02:20:00	2020-04-20 02:20:00	2020-04-20 02:20:00	2020	4	20
16	CP288	86	Prod	1093	78	2001	22	Universitätsklinikum Schleswig-Holstein	DE001	World	9116	Product change TP2	0	5852	APP_PRODUCTCHANGE_TP_2	Product change TP2	19		47755	Baseplate change TP 1	0		171780	16	2020-04-22 12:00:05	2020-04-22 12:00:05	2020-07-17 12:52:32	DE001	44	44	1	1	C31D712A-ACC5-472C-BE76-5A571AA9071C.JPEG	2020-04-22 13:23:00	2020-04-22 13:23:00	2020-04-22 13:23:00	2020	4	22	1	1	5C3BC76D-71BA-428F-9C45-9309AA0F7FCB.JPEG	2020-04-22 13:23:00	2020-04-22 13:23:00	2020-04-22 13:23:00	2020	4	22
16	CP288	86	Prod	1094	78	2002	22	Universitätsklinikum Schleswig-Holstein	DE001	World	9144	Product change TP1	0	5849	APP_PRODUCTCHANGE_TP_1	Product change TP1	17		47814	Baseplate change TP 1	0		131108	1	2020-02-05 19:00:10	2020-02-05 19:00:10	2020-07-17 12:52:32	DE001	0	0	1	1	1EEA10F4-0306-4917-A07C-65E5B5DF1DEA.JPEG	2020-02-05 19:10:00	2020-02-05 19:10:00	2020-02-05 19:10:00	2020	2	5	1	1	F7B226CF-9DC1-4807-8F1E-59CC51B00A74.JPEG	2020-02-05 19:10:00	2020-02-05 19:10:00	2020-02-05 19:10:00	2020	2	5
16	CP288	86	Prod	1094	78	2002	22	Universitätsklinikum Schleswig-Holstein	DE001	World	9144	Product change TP1	0	5849	APP_PRODUCTCHANGE_TP_1	Product change TP1	17		47814	Baseplate change TP 1	0		146422	2	2020-02-12 18:00:08	2020-02-12 18:00:08	2020-07-17 12:52:32	DE001	1	1	1	1	A994957A-516A-4B52-A862-DC6D894AC187.JPEG	2020-02-09 16:30:00	2020-02-09 16:30:00	2020-02-09 16:30:00	2020	2	9	1	1	FF2031B9-8C9C-4B31-95A8-887192EA7FE8.JPEG	2020-02-09 16:31:00	2020-02-09 16:31:00	2020-02-09 16:31:00	2020	2	9
16	CP288	86	Prod	1094	78	2002	22	Universitätsklinikum Schleswig-Holstein	DE001	World	9144	Product change TP1	0	5849	APP_PRODUCTCHANGE_TP_1	Product change TP1	17		47814	Baseplate change TP 1	0		146425	3	2020-02-12 19:00:09	2020-02-12 19:00:09	2020-07-17 12:52:32	DE001	2	2	1	1	8A033EC0-4AD9-46BC-8BFB-EC400F833B35.JPEG	2020-02-12 18:41:00	2020-02-12 18:41:00	2020-02-12 18:41:00	2020	2	12	1	1	6DACAB5E-775F-40CB-ADE5-75CA851B11CE.JPEG	2020-02-12 18:42:00	2020-02-12 18:42:00	2020-02-12 18:42:00	2020	2	12
16	CP288	86	Prod	1094	78	2002	22	Universitätsklinikum Schleswig-Holstein	DE001	World	9144	Product change TP1	0	5849	APP_PRODUCTCHANGE_TP_1	Product change TP1	17		47814	Baseplate change TP 1	0		146497	4	2020-02-14 18:00:05	2020-02-14 18:00:05	2020-07-17 12:52:32	DE001	3	3	1	1	1EF79E55-DC2D-4027-8728-10EE57BD31A4.JPEG	2020-02-14 18:13:00	2020-02-14 18:13:00	2020-02-14 18:13:00	2020	2	14	1	1	57E9807D-FB35-49BF-91B8-21DF8C5FC40D.JPEG	2020-02-14 18:13:00	2020-02-14 18:13:00	2020-02-14 18:13:00	2020	2	14
16	CP288	86	Prod	1094	78	2002	22	Universitätsklinikum Schleswig-Holstein	DE001	World	9144	Product change TP1	0	5849	APP_PRODUCTCHANGE_TP_1	Product change TP1	17		47814	Baseplate change TP 1	0		146568	5	2020-02-16 19:00:04	2020-02-16 19:00:04	2020-07-17 12:52:32	DE001	4	4	1	1	D821FED8-82FE-4696-ACE4-F8A1BCFC5D6B.JPEG	2020-02-16 18:46:00	2020-02-16 18:46:00	2020-02-16 18:46:00	2020	2	16	1	1	9156C67A-6EDA-444F-BAC4-B8DE54317667.JPEG	2020-02-16 18:46:00	2020-02-16 18:46:00	2020-02-16 18:46:00	2020	2	16
16	CP288	86	Prod	1094	78	2002	22	Universitätsklinikum Schleswig-Holstein	DE001	World	9144	Product change TP1	0	5849	APP_PRODUCTCHANGE_TP_1	Product change TP1	17		47814	Baseplate change TP 1	0		149648	6	2020-02-19 07:00:05	2020-02-19 07:00:05	2020-07-17 12:52:32	DE001	5	5	1	1	1F50426F-39C5-41C7-BE52-AAF928FD603C.JPEG	2020-02-19 07:33:00	2020-02-19 07:33:00	2020-02-19 07:33:00	2020	2	19	1	1	8EC5A61E-FCF2-430D-A749-53B5A6949398.JPEG	2020-02-19 07:33:00	2020-02-19 07:33:00	2020-02-19 07:33:00	2020	2	19
16	CP288	86	Prod	1094	78	2002	22	Universitätsklinikum Schleswig-Holstein	DE001	World	9144	Product change TP1	0	5849	APP_PRODUCTCHANGE_TP_1	Product change TP1	17		47814	Baseplate change TP 1	0		154285	7	2020-02-25 18:00:10	2020-02-25 18:00:10	2020-07-17 12:52:32	DE001	6	6	1	1	13F9775D-BBDC-495C-9EE5-16A8ABF5E2F4.JPEG	2020-02-22 10:43:00	2020-02-22 10:43:00	2020-02-22 10:43:00	2020	2	22	1	1	56CBFBCC-6D62-4ACA-889C-760C2C37A08E.JPEG	2020-02-22 10:44:00	2020-02-22 10:44:00	2020-02-22 10:44:00	2020	2	22
16	CP288	86	Prod	1094	78	2002	22	Universitätsklinikum Schleswig-Holstein	DE001	World	9144	Product change TP1	0	5849	APP_PRODUCTCHANGE_TP_1	Product change TP1	17		47814	Baseplate change TP 1	0		154671	8	2020-02-28 06:00:10	2020-02-28 06:00:10	2020-07-17 12:52:32	DE001	7	7	1	1	AAD65DBB-746B-445C-9744-42BC92CBCBAC.JPEG	2020-02-25 18:23:00	2020-02-25 18:23:00	2020-02-25 18:23:00	2020	2	25	1	1	E62C5D88-E5E7-479D-B3A2-8E9D5BD0A5CB.JPEG	2020-02-25 18:23:00	2020-02-25 18:23:00	2020-02-25 18:23:00	2020	2	25
16	CP288	86	Prod	1094	78	2002	22	Universitätsklinikum Schleswig-Holstein	DE001	World	9144	Product change TP1	0	5849	APP_PRODUCTCHANGE_TP_1	Product change TP1	17		47814	Baseplate change TP 1	0		154674	9	2020-02-28 06:00:16	2020-02-28 06:00:16	2020-07-17 12:52:32	DE001	8	8	1	1	5D97AFA7-9587-4E15-90CA-701F8DD41EA6.JPEG	2020-02-28 06:42:00	2020-02-28 06:42:00	2020-02-28 06:42:00	2020	2	28	1	1	00B8EAD3-8747-4D6C-970F-AF27FD936281.JPEG	2020-02-28 06:42:00	2020-02-28 06:42:00	2020-02-28 06:42:00	2020	2	28
16	CP288	86	Prod	1094	78	2002	22	Universitätsklinikum Schleswig-Holstein	DE001	World	9144	Product change TP1	0	5849	APP_PRODUCTCHANGE_TP_1	Product change TP1	17		47814	Baseplate change TP 1	0		154909	10	2020-03-01 18:00:08	2020-03-01 18:00:08	2020-07-17 12:52:32	DE001	9	9	1	1	BE4E4E4C-BF23-49F8-B6BC-704160FDDB4C.JPEG	2020-03-01 18:21:00	2020-03-01 18:21:00	2020-03-01 18:21:00	2020	3	1	1	1	7474BDD4-1172-40A9-8818-6B9DD75421C7.JPEG	2020-03-01 18:21:00	2020-03-01 18:21:00	2020-03-01 18:21:00	2020	3	1
16	CP288	86	Prod	1094	78	2002	22	Universitätsklinikum Schleswig-Holstein	DE001	World	9144	Product change TP1	0	5849	APP_PRODUCTCHANGE_TP_1	Product change TP1	17		47814	Baseplate change TP 1	0		161696	11	2020-03-18 18:00:05	2020-03-18 18:00:05	2020-07-17 12:52:32	DE001	10	10	1	1	65A77EE9-B7AF-4A12-800A-98C7FFAD84CB.JPEG	2020-03-03 18:38:00	2020-03-03 18:38:00	2020-03-03 18:38:00	2020	3	3	1	1	F1380BE9-9291-45F8-B1B9-B00A15F8B104.JPEG	2020-03-03 18:39:00	2020-03-03 18:39:00	2020-03-03 18:39:00	2020	3	3
16	CP288	86	Prod	1095	78	2003	22	Universitätsklinikum Schleswig-Holstein	DE001	World	9175	Product change TP1	0	5849	APP_PRODUCTCHANGE_TP_1	Product change TP1	17		47874	Baseplate change TP 1	0		131188	1	2020-02-13 08:00:09	2020-02-13 08:00:09	2020-07-17 12:52:32	DE001	0	0	1	1	1D01E49C-620D-47BF-9D3A-0160FA73BAE6.JPEG	2020-02-13 08:27:00	2020-02-13 08:27:00	2020-02-13 08:27:00	2020	2	13	1	1	BBBDC358-C14E-4D5D-97A9-817E60C860C7.JPEG	2020-02-13 08:28:00	2020-02-13 08:28:00	2020-02-13 08:28:00	2020	2	13
16	CP288	86	Prod	1095	78	2003	22	Universitätsklinikum Schleswig-Holstein	DE001	World	9178	Product change TP2	0	5852	APP_PRODUCTCHANGE_TP_2	Product change TP2	19		47875	Baseplate change TP 1	0		131190	1	2020-03-22 18:00:10	2020-03-22 18:00:10	2020-07-17 12:52:32	DE001	10	10	1	1	0AFE8623-C1DE-4E31-A1AF-01666A58D025.JPEG	2020-03-22 18:37:00	2020-03-22 18:37:00	2020-03-22 18:37:00	2020	3	22	1	1	F73A6BAC-0D0D-4D8D-A017-AA09F0E0FE58.JPEG	2020-03-22 18:37:00	2020-03-22 18:37:00	2020-03-22 18:37:00	2020	3	22
16	CP288	86	Prod	1095	78	2003	22	Universitätsklinikum Schleswig-Holstein	DE001	World	9175	Product change TP1	0	5849	APP_PRODUCTCHANGE_TP_1	Product change TP1	17		47874	Baseplate change TP 1	0		152589	2	2020-02-21 14:00:05	2020-02-21 14:00:05	2020-07-17 12:52:32	DE001	1	1	1	1	2E357E35-E950-4C20-BD9F-097639B941A5.JPEG	2020-02-17 10:12:00	2020-02-17 10:12:00	2020-02-17 10:12:00	2020	2	17	1	1	2073EE8D-AA6B-473C-BB2B-24C07C9E78B0.JPEG	2020-02-17 10:18:00	2020-02-17 10:18:00	2020-02-17 10:18:00	2020	2	17
16	CP288	86	Prod	1095	78	2003	22	Universitätsklinikum Schleswig-Holstein	DE001	World	9175	Product change TP1	0	5849	APP_PRODUCTCHANGE_TP_1	Product change TP1	17		47874	Baseplate change TP 1	0		152592	3	2020-02-21 14:00:11	2020-02-21 14:00:11	2020-07-17 12:52:32	DE001	2	2	1	1	21306238-4FAE-4DB7-A8AB-DDC8C41ED054.JPEG	2020-02-21 14:42:00	2020-02-21 14:42:00	2020-02-21 14:42:00	2020	2	21	1	1	E3B0F494-E565-4206-8FCB-4C795CB83818.JPEG	2020-02-21 14:45:00	2020-02-21 14:45:00	2020-02-21 14:45:00	2020	2	21
16	CP288	86	Prod	1095	78	2003	22	Universitätsklinikum Schleswig-Holstein	DE001	World	9175	Product change TP1	0	5849	APP_PRODUCTCHANGE_TP_1	Product change TP1	17		47874	Baseplate change TP 1	0		154299	4	2020-02-26 03:00:10	2020-02-26 03:00:10	2020-07-17 12:52:32	DE001	3	3	1	1	5EE42198-BDD9-4250-8211-A67F409DEF61.JPEG	2020-02-26 03:08:00	2020-02-26 03:08:00	2020-02-26 03:08:00	2020	2	26	1	1	CAAEF251-8ADF-4763-99E4-ACB27759B270.JPEG	2020-02-26 03:09:00	2020-02-26 03:09:00	2020-02-26 03:09:00	2020	2	26
16	CP288	86	Prod	1095	78	2003	22	Universitätsklinikum Schleswig-Holstein	DE001	World	9175	Product change TP1	0	5849	APP_PRODUCTCHANGE_TP_1	Product change TP1	17		47874	Baseplate change TP 1	0		154748	5	2020-02-28 15:00:05	2020-02-28 15:00:05	2020-07-17 12:52:32	DE001	4	4	1	1	0832FBD3-C2C4-4152-AE97-45863A07F8A7.JPEG	2020-02-28 15:31:00	2020-02-28 15:31:00	2020-02-28 15:31:00	2020	2	28	1	1	A7B3BB02-0E94-4A26-A958-544624DAA01D.JPEG	2020-02-28 15:38:00	2020-02-28 15:38:00	2020-02-28 15:38:00	2020	2	28
16	CP288	86	Prod	1095	78	2003	22	Universitätsklinikum Schleswig-Holstein	DE001	World	9175	Product change TP1	0	5849	APP_PRODUCTCHANGE_TP_1	Product change TP1	17		47874	Baseplate change TP 1	0		157945	6	2020-03-06 15:00:06	2020-03-06 15:00:06	2020-07-17 12:52:32	DE001	5	5	1	1	E77186A4-601B-4E22-BFF6-60DC0795B813.JPEG	2020-03-06 14:49:00	2020-03-06 14:49:00	2020-03-06 14:49:00	2020	3	6	1	1	AE1EE03D-C183-4FE2-8591-84797BDD5037.JPEG	2020-03-06 14:50:00	2020-03-06 14:50:00	2020-03-06 14:50:00	2020	3	6
16	CP288	86	Prod	1095	78	2003	22	Universitätsklinikum Schleswig-Holstein	DE001	World	9175	Product change TP1	0	5849	APP_PRODUCTCHANGE_TP_1	Product change TP1	17		47874	Baseplate change TP 1	0		161721	7	2020-03-18 23:00:04	2020-03-18 23:00:04	2020-07-17 12:52:32	DE001	6	6	1	1	1A95BCBD-EB80-42F9-BF69-66F7492ABD1F.JPEG	2020-03-11 13:43:00	2020-03-11 13:43:00	2020-03-11 13:43:00	2020	3	11	1	1	CF06555E-902E-4CAB-AD1F-E03CF6008345.JPEG	2020-03-11 13:43:00	2020-03-11 13:43:00	2020-03-11 13:43:00	2020	3	11
16	CP288	86	Prod	1095	78	2003	22	Universitätsklinikum Schleswig-Holstein	DE001	World	9175	Product change TP1	0	5849	APP_PRODUCTCHANGE_TP_1	Product change TP1	17		47874	Baseplate change TP 1	0		161724	8	2020-03-18 23:00:07	2020-03-18 23:00:07	2020-07-17 12:52:32	DE001	7	7	1	1	0D3440B3-1E1A-44DC-A5FF-8C42104545AF.JPEG	2020-03-18 23:12:00	2020-03-18 23:12:00	2020-03-18 23:12:00	2020	3	18	1	1	1C5F8AAD-E32F-46D8-BCA2-2FF7F60A769E.JPEG	2020-03-18 23:13:00	2020-03-18 23:13:00	2020-03-18 23:13:00	2020	3	18
16	CP288	86	Prod	1095	78	2003	22	Universitätsklinikum Schleswig-Holstein	DE001	World	9178	Product change TP2	0	5852	APP_PRODUCTCHANGE_TP_2	Product change TP2	19		47875	Baseplate change TP 1	0		162780	2	2020-03-22 18:00:17	2020-03-22 18:00:17	2020-07-17 12:52:32	DE001	9	9	1	1	DF574D1B-BEDF-4994-81FA-63FDD7841614.JPEG	2020-03-21 14:02:00	2020-03-21 14:02:00	2020-03-21 14:02:00	2020	3	21	1	1	C167D78D-7FE0-4CE7-AF7B-76E4A8C055F5.JPEG	2020-03-21 14:03:00	2020-03-21 14:03:00	2020-03-21 14:03:00	2020	3	21
16	CP288	86	Prod	1095	78	2003	22	Universitätsklinikum Schleswig-Holstein	DE001	World	9178	Product change TP2	0	5852	APP_PRODUCTCHANGE_TP_2	Product change TP2	19		47875	Baseplate change TP 1	0		163838	3	2020-03-25 20:00:04	2020-03-25 20:00:04	2020-07-17 12:52:32	DE001	11	11	1	1	8796AF1F-97F7-4A47-BB8F-048F8A427CEC.JPEG	2020-03-25 20:15:00	2020-03-25 20:15:00	2020-03-25 20:15:00	2020	3	25	1	1	47F3AA1B-BE61-43BD-9D6C-9B202F2BF86C.JPEG	2020-03-25 20:20:00	2020-03-25 20:20:00	2020-03-25 20:20:00	2020	3	25
16	CP288	86	Prod	1095	78	2003	22	Universitätsklinikum Schleswig-Holstein	DE001	World	9178	Product change TP2	0	5852	APP_PRODUCTCHANGE_TP_2	Product change TP2	19		47875	Baseplate change TP 1	0		164668	4	2020-03-29 19:00:05	2020-03-29 19:00:05	2020-07-17 12:52:32	DE001	12	12	1	1	45BA0EDF-8972-4997-AE85-ECB49E087374.JPEG	2020-03-26 06:53:00	2020-03-26 06:53:00	2020-03-26 06:53:00	2020	3	26	1	1	55DFD80C-F7CD-47B5-9E1A-980CF60497EB.JPEG	2020-03-26 06:53:00	2020-03-26 06:53:00	2020-03-26 06:53:00	2020	3	26
16	CP288	86	Prod	1095	78	2003	22	Universitätsklinikum Schleswig-Holstein	DE001	World	9178	Product change TP2	0	5852	APP_PRODUCTCHANGE_TP_2	Product change TP2	19		47875	Baseplate change TP 1	0		164671	5	2020-03-29 19:00:08	2020-03-29 19:00:08	2020-07-17 12:52:32	DE001	13	13	1	1	7AF10847-C5A8-4BB9-AE8C-DDA262E8411E.JPEG	2020-03-29 20:21:00	2020-03-29 20:21:00	2020-03-29 20:21:00	2020	3	29	1	1	6299B27D-F0CA-4ACE-A3A6-697BBCCFDD03.JPEG	2020-03-29 20:22:00	2020-03-29 20:22:00	2020-03-29 20:22:00	2020	3	29
16	CP288	86	Prod	1095	78	2003	22	Universitätsklinikum Schleswig-Holstein	DE001	World	9178	Product change TP2	0	5852	APP_PRODUCTCHANGE_TP_2	Product change TP2	19		47875	Baseplate change TP 1	0		165220	6	2020-03-31 14:00:05	2020-03-31 14:00:05	2020-07-17 12:52:32	DE001	14	14	1	1	9D736D5B-7345-4F93-86E8-EC7A5E4B37E7.JPEG	2020-03-31 15:33:00	2020-03-31 15:33:00	2020-03-31 15:33:00	2020	3	31	1	1	0EB95F3D-2B7C-4C95-8FA7-2CA765CEAE30.JPEG	2020-03-31 15:33:00	2020-03-31 15:33:00	2020-03-31 15:33:00	2020	3	31
16	CP288	86	Prod	1095	78	2003	22	Universitätsklinikum Schleswig-Holstein	DE001	World	9178	Product change TP2	0	5852	APP_PRODUCTCHANGE_TP_2	Product change TP2	19		47875	Baseplate change TP 1	0		168600	7	2020-04-03 14:00:04	2020-04-03 14:00:04	2020-07-17 12:52:32	DE001	15	15	1	1	FA6DEBCD-6112-4220-B230-75C7C7FE774C.JPEG	2020-04-03 15:36:00	2020-04-03 15:36:00	2020-04-03 15:36:00	2020	4	3	1	1	8E307E7B-1223-4331-A617-32A933E06687.JPEG	2020-04-03 15:37:00	2020-04-03 15:37:00	2020-04-03 15:37:00	2020	4	3
16	CP288	86	Prod	1095	78	2003	22	Universitätsklinikum Schleswig-Holstein	DE001	World	9178	Product change TP2	0	5852	APP_PRODUCTCHANGE_TP_2	Product change TP2	19		47875	Baseplate change TP 1	0		169391	8	2020-04-10 09:00:01	2020-04-10 09:00:01	2020-07-17 12:52:32	DE001	16	16	1	1	46F91F88-0205-4DCD-822A-56568C3571FC.JPEG	2020-04-06 22:29:00	2020-04-06 22:29:00	2020-04-06 22:29:00	2020	4	6	1	1	2AB29A7E-6226-44A7-8E33-1C193832268A.JPEG	2020-04-06 22:29:00	2020-04-06 22:29:00	2020-04-06 22:29:00	2020	4	6
16	CP288	86	Prod	1095	78	2003	22	Universitätsklinikum Schleswig-Holstein	DE001	World	9178	Product change TP2	0	5852	APP_PRODUCTCHANGE_TP_2	Product change TP2	19		47875	Baseplate change TP 1	0		169394	9	2020-04-10 09:00:04	2020-04-10 09:00:04	2020-07-17 12:52:32	DE001	17	17	1	1	AFC73915-CE7F-45C4-8A33-0EDB9021B4A4.JPEG	2020-04-10 10:31:00	2020-04-10 10:31:00	2020-04-10 10:31:00	2020	4	10	1	1	A97C0EF6-A11A-4882-98E5-DCFF4517C9AE.JPEG	2020-04-10 10:31:00	2020-04-10 10:31:00	2020-04-10 10:31:00	2020	4	10
16	CP288	86	Prod	1096	78	2004	22	Universitätsklinikum Schleswig-Holstein	DE001	World	9206	Product change TP1	0	5849	APP_PRODUCTCHANGE_TP_1	Product change TP1	17		47934	Baseplate change TP 1	0		131268	1	2020-02-16 18:00:05	2020-02-16 18:00:05	2020-07-17 12:52:32	DE001	0	0	1	1	72DDE503-FF59-4FAB-B73C-6064D4F20541.JPEG	2020-01-20 15:32:00	2020-01-20 15:32:00	2020-01-20 15:32:00	2020	1	20	1	1	7D4695DD-1508-4ED2-9794-808084E1542F.JPEG	2020-01-20 15:39:00	2020-01-20 15:39:00	2020-01-20 15:39:00	2020	1	20
16	CP288	86	Prod	1096	78	2004	22	Universitätsklinikum Schleswig-Holstein	DE001	World	9209	Product change TP2	0	5852	APP_PRODUCTCHANGE_TP_2	Product change TP2	19		47935	Baseplate change TP 1	0		131270	1	2020-03-23 07:00:07	2020-03-23 07:00:07	2020-07-17 12:52:32	DE001	20	20	1	1	D99E2045-E882-4DDF-8008-D4500558A1FD.JPEG	2020-03-23 07:12:00	2020-03-23 07:12:00	2020-03-23 07:12:00	2020	3	23	1	1	723362A3-1122-4D51-ACFD-5DAC44C48091.JPEG	2020-03-23 07:13:00	2020-03-23 07:13:00	2020-03-23 07:13:00	2020	3	23
16	CP288	86	Prod	1096	78	2004	22	Universitätsklinikum Schleswig-Holstein	DE001	World	9206	Product change TP1	0	5849	APP_PRODUCTCHANGE_TP_1	Product change TP1	17		47934	Baseplate change TP 1	0		146562	2	2020-02-16 18:00:11	2020-02-16 18:00:11	2020-07-17 12:52:32	DE001	1	1	1	1	FE1ED500-91F5-40B7-817B-4DF9C9C4BD01.JPEG	2020-01-22 14:36:00	2020-01-22 14:36:00	2020-01-22 14:36:00	2020	1	22	1	1	730DD0C2-0DC9-45E9-BF33-97855DCE584F.JPEG	2020-01-22 14:36:00	2020-01-22 14:36:00	2020-01-22 14:36:00	2020	1	22
16	CP288	86	Prod	1096	78	2004	22	Universitätsklinikum Schleswig-Holstein	DE001	World	9206	Product change TP1	0	5849	APP_PRODUCTCHANGE_TP_1	Product change TP1	17		47934	Baseplate change TP 1	0		146565	3	2020-02-16 18:00:16	2020-02-16 18:00:16	2020-07-17 12:52:32	DE001	2	2	1	1	6E495ED0-9D7F-4959-92BF-DC202661DA7B.JPEG	2020-01-25 01:28:00	2020-01-25 01:28:00	2020-01-25 01:28:00	2020	1	25	1	1	401255A8-6FA4-4947-A9B3-A43371C3B90E.JPEG	2020-01-25 01:31:00	2020-01-25 01:31:00	2020-01-25 01:31:00	2020	1	25
16	CP288	86	Prod	1096	78	2004	22	Universitätsklinikum Schleswig-Holstein	DE001	World	9206	Product change TP1	0	5849	APP_PRODUCTCHANGE_TP_1	Product change TP1	17		47934	Baseplate change TP 1	0		149444	4	2020-02-18 17:00:37	2020-02-18 17:00:37	2020-07-17 12:52:32	DE001	3	3	1	1	947FAD84-769A-4895-ADA5-7BABA54199F6.JPEG	2020-02-16 18:03:00	2020-02-16 18:03:00	2020-02-16 18:03:00	2020	2	16	1	1	8EA115A3-5E88-442D-A4D4-B9AF29F19B95.JPEG	2020-02-16 18:03:00	2020-02-16 18:03:00	2020-02-16 18:03:00	2020	2	16
16	CP288	86	Prod	1096	78	2004	22	Universitätsklinikum Schleswig-Holstein	DE001	World	9206	Product change TP1	0	5849	APP_PRODUCTCHANGE_TP_1	Product change TP1	17		47934	Baseplate change TP 1	0		153126	5	2020-02-24 13:00:14	2020-02-24 13:00:14	2020-07-17 12:52:32	DE001	4	4	1	1	00B5E6EC-8D9D-458A-BBA3-40B1E0F4C70A.JPEG	2020-02-18 17:28:00	2020-02-18 17:28:00	2020-02-18 17:28:00	2020	2	18	1	1	B1A8B044-C5FA-4047-BCBD-ABD355A5D44B.JPEG	2020-02-18 17:29:00	2020-02-18 17:29:00	2020-02-18 17:29:00	2020	2	18
16	CP288	86	Prod	1096	78	2004	22	Universitätsklinikum Schleswig-Holstein	DE001	World	9206	Product change TP1	0	5849	APP_PRODUCTCHANGE_TP_1	Product change TP1	17		47934	Baseplate change TP 1	0		154262	6	2020-02-25 17:00:06	2020-02-25 17:00:06	2020-07-17 12:52:32	DE001	7	7	1	1	240A22A9-799E-47D8-BC51-4B750FFBC224.JPEG	2020-02-24 13:10:00	2020-02-24 13:10:00	2020-02-24 13:10:00	2020	2	24	1	1	C888DE1C-9DE7-4AF0-B1EE-11BD7D4B36E3.JPEG	2020-02-24 13:11:00	2020-02-24 13:11:00	2020-02-24 13:11:00	2020	2	24
16	CP288	86	Prod	1096	78	2004	22	Universitätsklinikum Schleswig-Holstein	DE001	World	9206	Product change TP1	0	5849	APP_PRODUCTCHANGE_TP_1	Product change TP1	17		47934	Baseplate change TP 1	0		154701	7	2020-02-28 09:00:07	2020-02-28 09:00:07	2020-07-17 12:52:32	DE001	10	10	1	1	C29FF10E-1681-4E67-BFB5-A4C4075C628F.JPEG	2020-02-28 09:19:00	2020-02-28 09:19:00	2020-02-28 09:19:00	2020	2	28	1	1	4099A375-A647-4485-A7E7-65B50EF7D794.JPEG	2020-02-28 09:19:00	2020-02-28 09:19:00	2020-02-28 09:19:00	2020	2	28
16	CP288	86	Prod	1096	78	2004	22	Universitätsklinikum Schleswig-Holstein	DE001	World	9206	Product change TP1	0	5849	APP_PRODUCTCHANGE_TP_1	Product change TP1	17		47934	Baseplate change TP 1	0		154868	8	2020-03-01 08:00:08	2020-03-01 08:00:08	2020-07-17 12:52:32	DE001	11	11	1	1	852DF590-88FA-4982-8948-9DD8B0E80263.JPEG	2020-03-01 08:25:00	2020-03-01 08:25:00	2020-03-01 08:25:00	2020	3	1	1	1	DAA63E0C-B0FC-42B1-8D42-5BE26FC1C44F.JPEG	2020-03-01 08:26:00	2020-03-01 08:26:00	2020-03-01 08:26:00	2020	3	1
16	CP288	86	Prod	1096	78	2004	22	Universitätsklinikum Schleswig-Holstein	DE001	World	9206	Product change TP1	0	5849	APP_PRODUCTCHANGE_TP_1	Product change TP1	17		47934	Baseplate change TP 1	0		158106	9	2020-03-09 06:00:09	2020-03-09 06:00:09	2020-07-17 12:52:32	DE001	12	12	1	1	A5667271-7362-4694-9D1F-0CA4B903BFFA.JPEG	2020-03-06 06:52:00	2020-03-06 06:52:00	2020-03-06 06:52:00	2020	3	6	1	1	4BC45D93-7088-460C-8D78-B390CFD4A881.JPEG	2020-03-06 06:53:00	2020-03-06 06:53:00	2020-03-06 06:53:00	2020	3	6
16	CP288	86	Prod	1096	78	2004	22	Universitätsklinikum Schleswig-Holstein	DE001	World	9206	Product change TP1	0	5849	APP_PRODUCTCHANGE_TP_1	Product change TP1	17		47934	Baseplate change TP 1	0		158118	10	2020-03-09 07:00:08	2020-03-09 07:00:08	2020-07-17 12:52:32	DE001	14	14	1	1	A903A043-81CE-4FB7-9F03-394B746842A6.JPEG	2020-03-09 07:02:00	2020-03-09 07:02:00	2020-03-09 07:02:00	2020	3	9	1	1	493F3002-1B94-4976-B956-BD095BA19E8F.JPEG	2020-03-09 07:04:00	2020-03-09 07:04:00	2020-03-09 07:04:00	2020	3	9
16	CP288	86	Prod	1096	78	2004	22	Universitätsklinikum Schleswig-Holstein	DE001	World	9206	Product change TP1	0	5849	APP_PRODUCTCHANGE_TP_1	Product change TP1	17		47934	Baseplate change TP 1	0		158394	11	2020-03-11 07:00:07	2020-03-11 07:00:07	2020-07-17 12:52:32	DE001	15	15	1	1	904DC795-8B4F-44F3-A15E-D27571A90209.JPEG	2020-03-11 07:14:00	2020-03-11 07:14:00	2020-03-11 07:14:00	2020	3	11	1	1	585EB6CC-5F1E-45AC-97E9-D05A65398BF1.JPEG	2020-03-11 07:15:00	2020-03-11 07:15:00	2020-03-11 07:15:00	2020	3	11
16	CP288	86	Prod	1096	78	2004	22	Universitätsklinikum Schleswig-Holstein	DE001	World	9206	Product change TP1	0	5849	APP_PRODUCTCHANGE_TP_1	Product change TP1	17		47934	Baseplate change TP 1	0		159317	12	2020-03-16 07:00:14	2020-03-16 07:00:14	2020-07-17 12:52:32	DE001	16	16	1	1	E84BEA6A-6313-4B92-8599-622144CE1458.JPEG	2020-03-16 07:08:00	2020-03-16 07:08:00	2020-03-16 07:08:00	2020	3	16	1	1	293EE577-5D00-4AE0-84FD-107EC54A4AC7.JPEG	2020-03-16 07:12:00	2020-03-16 07:12:00	2020-03-16 07:12:00	2020	3	16
16	CP288	86	Prod	1096	78	2004	22	Universitätsklinikum Schleswig-Holstein	DE001	World	9206	Product change TP1	0	5849	APP_PRODUCTCHANGE_TP_1	Product change TP1	17		47934	Baseplate change TP 1	0		162255	13	2020-03-20 07:00:09	2020-03-20 07:00:09	2020-07-17 12:52:32	DE001	17	17	1	1	12832511-B989-4F7B-B38E-57F454253CEB.JPEG	2020-03-20 07:40:00	2020-03-20 07:40:00	2020-03-20 07:40:00	2020	3	20	1	1	A665CADC-1B76-4049-8F63-CE8736650AFF.JPEG	2020-03-20 07:42:00	2020-03-20 07:42:00	2020-03-20 07:42:00	2020	3	20
16	CP288	86	Prod	1096	78	2004	22	Universitätsklinikum Schleswig-Holstein	DE001	World	9209	Product change TP2	0	5852	APP_PRODUCTCHANGE_TP_2	Product change TP2	19		47935	Baseplate change TP 1	0		163413	2	2020-03-24 07:00:03	2020-03-24 07:00:03	2020-07-17 12:52:32	DE001	21	21	1	1	A1CB66C9-26BE-4AC9-BCA8-8784C9D57D21.JPEG	2020-03-24 07:19:00	2020-03-24 07:19:00	2020-03-24 07:19:00	2020	3	24	1	1	8BCD9B0D-476E-4FE7-BFBD-FB5B66819735.JPEG	2020-03-24 07:21:00	2020-03-24 07:21:00	2020-03-24 07:21:00	2020	3	24
16	CP288	86	Prod	1097	78	2005	22	Universitätsklinikum Schleswig-Holstein	DE001	World	9237	Product change TP1	0	5849	APP_PRODUCTCHANGE_TP_1	Product change TP1	17		47994	Baseplate change TP 1	0		131379	1	2020-02-08 09:00:17	2020-02-08 09:00:17	2020-07-17 12:52:32	DE001	0	0	1	1	1E6C8381-ED7D-49E2-858D-B341FFDE8015.JPEG	2020-02-08 08:53:00	2020-02-08 08:53:00	2020-02-08 08:53:00	2020	2	8	1	1	D4CB7F27-7A53-44DB-AE8F-625416DD606B.JPEG	2020-02-08 08:56:00	2020-02-08 08:56:00	2020-02-08 08:56:00	2020	2	8
16	CP288	86	Prod	1097	78	2005	22	Universitätsklinikum Schleswig-Holstein	DE001	World	9237	Product change TP1	0	5849	APP_PRODUCTCHANGE_TP_1	Product change TP1	17		47994	Baseplate change TP 1	0		146071	2	2020-02-10 12:00:05	2020-02-10 12:00:05	2020-07-17 12:52:32	DE001	1	1	1	1	3A489F71-AA98-411F-A552-2EBDB993F09B.JPEG	2020-02-10 12:06:00	2020-02-10 12:06:00	2020-02-10 12:06:00	2020	2	10	1	1	1314AE2D-BA36-49E0-A47E-669AD9ACC913.JPEG	2020-02-10 12:10:00	2020-02-10 12:10:00	2020-02-10 12:10:00	2020	2	10
16	CP288	86	Prod	1097	78	2005	22	Universitätsklinikum Schleswig-Holstein	DE001	World	9237	Product change TP1	0	5849	APP_PRODUCTCHANGE_TP_1	Product change TP1	17		47994	Baseplate change TP 1	0		146110	3	2020-02-11 08:00:03	2020-02-11 08:00:03	2020-07-17 12:52:32	DE001	2	2	1	1	8BA85CCB-BCEF-4329-9B2B-3A13E6AC48F4.JPEG	2020-02-11 08:24:00	2020-02-11 08:24:00	2020-02-11 08:24:00	2020	2	11	1	1	C3EA99E1-4024-45F2-9DD2-5DE7AF49845E.JPEG	2020-02-11 08:25:00	2020-02-11 08:25:00	2020-02-11 08:25:00	2020	2	11
16	CP288	86	Prod	1097	78	2005	22	Universitätsklinikum Schleswig-Holstein	DE001	World	9237	Product change TP1	0	5849	APP_PRODUCTCHANGE_TP_1	Product change TP1	17		47994	Baseplate change TP 1	0		146443	4	2020-02-13 08:00:14	2020-02-13 08:00:14	2020-07-17 12:52:32	DE001	3	3	1	1	01807896-7338-4D06-A3DB-BAA204C53CA0.JPEG	2020-02-13 08:48:00	2020-02-13 08:48:00	2020-02-13 08:48:00	2020	2	13	1	1	E50E89F4-B55C-4FEC-AA7C-AC5C7E9E602D.JPEG	2020-02-13 08:50:00	2020-02-13 08:50:00	2020-02-13 08:50:00	2020	2	13
16	CP288	86	Prod	1097	78	2005	22	Universitätsklinikum Schleswig-Holstein	DE001	World	9237	Product change TP1	0	5849	APP_PRODUCTCHANGE_TP_1	Product change TP1	17		47994	Baseplate change TP 1	0		146583	5	2020-02-17 08:00:06	2020-02-17 08:00:06	2020-07-17 12:52:32	DE001	4	4	1	1	8077C812-590C-4D08-BA59-396D4EA508E2.JPEG	2020-02-17 08:03:00	2020-02-17 08:03:00	2020-02-17 08:03:00	2020	2	17	1	1	9269B2CA-683A-4187-A57C-1F9021475CFA.JPEG	2020-02-17 08:05:00	2020-02-17 08:05:00	2020-02-17 08:05:00	2020	2	17
16	CP288	86	Prod	1097	78	2005	22	Universitätsklinikum Schleswig-Holstein	DE001	World	9237	Product change TP1	0	5849	APP_PRODUCTCHANGE_TP_1	Product change TP1	17		47994	Baseplate change TP 1	0		149794	6	2020-02-19 08:00:31	2020-02-19 08:00:31	2020-07-17 12:52:32	DE001	5	5	1	1	923ED150-C680-4206-B8A2-14C5F38D8766.JPEG	2020-02-19 08:10:00	2020-02-19 08:10:00	2020-02-19 08:10:00	2020	2	19	1	1	6AF6B88F-900D-4549-B3FC-F2F425A7DA6B.JPEG	2020-02-19 08:12:00	2020-02-19 08:12:00	2020-02-19 08:12:00	2020	2	19
16	CP288	86	Prod	1097	78	2005	22	Universitätsklinikum Schleswig-Holstein	DE001	World	9237	Product change TP1	0	5849	APP_PRODUCTCHANGE_TP_1	Product change TP1	17		47994	Baseplate change TP 1	0		152573	7	2020-02-21 07:00:08	2020-02-21 07:00:08	2020-07-17 12:52:32	DE001	6	6	1	1	241B5FAA-2854-46F9-B525-215449A182B8.JPEG	2020-02-21 07:24:00	2020-02-21 07:24:00	2020-02-21 07:24:00	2020	2	21	1	1	34F9165D-25F4-467C-ADFF-B3F24A7D4E9C.JPEG	2020-02-21 07:25:00	2020-02-21 07:25:00	2020-02-21 07:25:00	2020	2	21
16	CP288	86	Prod	1097	78	2005	22	Universitätsklinikum Schleswig-Holstein	DE001	World	9237	Product change TP1	0	5849	APP_PRODUCTCHANGE_TP_1	Product change TP1	17		47994	Baseplate change TP 1	0		153134	8	2020-02-24 13:00:19	2020-02-24 13:00:19	2020-07-17 12:52:32	DE001	7	7	1	1	02BEC46D-460F-4B02-B5EB-B24B0DB434C4.JPEG	2020-02-24 13:19:00	2020-02-24 13:19:00	2020-02-24 13:19:00	2020	2	24	1	1	34DDC86E-3866-4E81-AA2D-53750BDE1DA4.JPEG	2020-02-24 13:19:00	2020-02-24 13:19:00	2020-02-24 13:19:00	2020	2	24
16	CP288	86	Prod	1097	78	2005	22	Universitätsklinikum Schleswig-Holstein	DE001	World	9237	Product change TP1	0	5849	APP_PRODUCTCHANGE_TP_1	Product change TP1	17		47994	Baseplate change TP 1	0		154317	9	2020-02-26 08:00:12	2020-02-26 08:00:12	2020-07-17 12:52:32	DE001	8	8	1	1	7552B70C-4744-4C10-BE92-C262F4A7517D.JPEG	2020-02-26 08:03:00	2020-02-26 08:03:00	2020-02-26 08:03:00	2020	2	26	1	1	011760B6-EC8D-4B82-94EE-33DC93878DBD.JPEG	2020-02-26 08:04:00	2020-02-26 08:04:00	2020-02-26 08:04:00	2020	2	26
16	CP288	86	Prod	1097	78	2005	22	Universitätsklinikum Schleswig-Holstein	DE001	World	9237	Product change TP1	0	5849	APP_PRODUCTCHANGE_TP_1	Product change TP1	17		47994	Baseplate change TP 1	0		154689	10	2020-02-28 08:00:20	2020-02-28 08:00:20	2020-07-17 12:52:32	DE001	9	9	1	1	22246D7B-AF88-412C-B8B4-E4D54B671870.JPEG	2020-02-28 08:09:00	2020-02-28 08:09:00	2020-02-28 08:09:00	2020	2	28	1	1	DA534A39-DA8C-45BC-BF93-76A6FAC12050.JPEG	2020-02-28 08:09:00	2020-02-28 08:09:00	2020-02-28 08:09:00	2020	2	28
16	CP288	86	Prod	1097	78	2005	22	Universitätsklinikum Schleswig-Holstein	DE001	World	9237	Product change TP1	0	5849	APP_PRODUCTCHANGE_TP_1	Product change TP1	17		47994	Baseplate change TP 1	0		154880	11	2020-03-01 09:00:19	2020-03-01 09:00:19	2020-07-17 12:52:32	DE001	10	10	1	1	75885443-F243-4E40-8D43-E41C82B75791.JPEG	2020-03-01 08:57:00	2020-03-01 08:57:00	2020-03-01 08:57:00	2020	3	1	1	1	D3DAE288-2776-4A92-817D-8595540F92A0.JPEG	2020-03-01 08:58:00	2020-03-01 08:58:00	2020-03-01 08:58:00	2020	3	1
16	CP288	86	Prod	1097	78	2005	22	Universitätsklinikum Schleswig-Holstein	DE001	World	9237	Product change TP1	0	5849	APP_PRODUCTCHANGE_TP_1	Product change TP1	17		47994	Baseplate change TP 1	0		155681	12	2020-03-03 08:00:09	2020-03-03 08:00:09	2020-07-17 12:52:32	DE001	11	11	1	1	02CECCB5-4DA0-4D43-9C66-FFB76610081D.JPEG	2020-03-03 07:53:00	2020-03-03 07:53:00	2020-03-03 07:53:00	2020	3	3	1	1	D8226FDE-3704-4532-BA03-C123ED7EB6D3.JPEG	2020-03-03 07:58:00	2020-03-03 07:58:00	2020-03-03 07:58:00	2020	3	3
16	CP288	86	Prod	1097	78	2005	22	Universitätsklinikum Schleswig-Holstein	DE001	World	9237	Product change TP1	0	5849	APP_PRODUCTCHANGE_TP_1	Product change TP1	17		47994	Baseplate change TP 1	0		157969	13	2020-03-07 08:00:09	2020-03-07 08:00:09	2020-07-17 12:52:32	DE001	12	12	1	1	CA84ABCB-840B-441A-934E-384B5F3D0972.JPEG	2020-03-05 07:01:00	2020-03-05 07:01:00	2020-03-05 07:01:00	2020	3	5	1	1	1BFF4F65-748A-4B3A-8DF6-8B873D1456FF.JPEG	2020-03-05 07:02:00	2020-03-05 07:02:00	2020-03-05 07:02:00	2020	3	5
16	CP288	86	Prod	1097	78	2005	22	Universitätsklinikum Schleswig-Holstein	DE001	World	9237	Product change TP1	0	5849	APP_PRODUCTCHANGE_TP_1	Product change TP1	17		47994	Baseplate change TP 1	0		157972	14	2020-03-07 08:00:12	2020-03-07 08:00:12	2020-07-17 12:52:32	DE001	13	13	1	1	B6EE6464-06F3-4323-86F2-678651E89A11.JPEG	2020-03-07 08:15:00	2020-03-07 08:15:00	2020-03-07 08:15:00	2020	3	7	1	1	EC5534E9-0C9C-4AC8-BBC3-BB92EC5BD68C.JPEG	2020-03-07 08:16:00	2020-03-07 08:16:00	2020-03-07 08:16:00	2020	3	7
16	CP288	86	Prod	1097	78	2005	22	Universitätsklinikum Schleswig-Holstein	DE001	World	9237	Product change TP1	0	5849	APP_PRODUCTCHANGE_TP_1	Product change TP1	17		47994	Baseplate change TP 1	0		158138	15	2020-03-09 08:00:19	2020-03-09 08:00:19	2020-07-17 12:52:32	DE001	15	15	1	1	932D0C05-DA4F-483B-81DE-36DCE9916467.JPEG	2020-03-09 07:59:00	2020-03-09 07:59:00	2020-03-09 07:59:00	2020	3	9	1	1	C80BDAD6-D110-4D16-8EF6-84000E1C6F5E.JPEG	2020-03-09 08:00:00	2020-03-09 08:00:00	2020-03-09 08:00:00	2020	3	9
16	CP288	86	Prod	1097	78	2005	22	Universitätsklinikum Schleswig-Holstein	DE001	World	9237	Product change TP1	0	5849	APP_PRODUCTCHANGE_TP_1	Product change TP1	17		47994	Baseplate change TP 1	0		158397	16	2020-03-11 07:00:10	2020-03-11 07:00:10	2020-07-17 12:52:32	DE001	16	16	1	1	A7CE1CA8-B0BB-41EF-8FD0-9AA0E41598E8.JPEG	2020-03-11 07:37:00	2020-03-11 07:37:00	2020-03-11 07:37:00	2020	3	11	1	1	2C854515-23CF-4697-A20F-EA24633EDE76.JPEG	2020-03-11 07:38:00	2020-03-11 07:38:00	2020-03-11 07:38:00	2020	3	11
16	CP288	86	Prod	1097	78	2005	22	Universitätsklinikum Schleswig-Holstein	DE001	World	9237	Product change TP1	0	5849	APP_PRODUCTCHANGE_TP_1	Product change TP1	17		47994	Baseplate change TP 1	0		158681	17	2020-03-13 08:00:08	2020-03-13 08:00:08	2020-07-17 12:52:32	DE001	17	17	1	1	B3279983-AA1E-4986-AABD-672F33CCDEB9.JPEG	2020-03-13 07:57:00	2020-03-13 07:57:00	2020-03-13 07:57:00	2020	3	13	1	1	4D42AE70-D829-4168-AEBF-76C34F2B73C1.JPEG	2020-03-13 07:58:00	2020-03-13 07:58:00	2020-03-13 07:58:00	2020	3	13
16	CP288	86	Prod	1097	78	2005	22	Universitätsklinikum Schleswig-Holstein	DE001	World	9237	Product change TP1	0	5849	APP_PRODUCTCHANGE_TP_1	Product change TP1	17		47994	Baseplate change TP 1	0		158978	18	2020-03-15 12:00:06	2020-03-15 12:00:06	2020-07-17 12:52:32	DE001	18	18	1	1	301BDB2D-277C-429F-A1AA-3F6D28C91CF1.JPEG	2020-03-15 12:33:00	2020-03-15 12:33:00	2020-03-15 12:33:00	2020	3	15	1	1	687AD963-A5D0-4FA3-9E3A-E8FE762B07F5.JPEG	2020-03-15 12:34:00	2020-03-15 12:34:00	2020-03-15 12:34:00	2020	3	15
16	CP288	86	Prod	1097	78	2005	22	Universitätsklinikum Schleswig-Holstein	DE001	World	9237	Product change TP1	0	5849	APP_PRODUCTCHANGE_TP_1	Product change TP1	17		47994	Baseplate change TP 1	0		162747	19	2020-03-22 08:00:06	2020-03-22 08:00:06	2020-07-17 12:52:32	DE001	21	21	1	1	5585287B-B339-4AE2-979B-6A9BCA3ABAA5.JPEG	2020-03-20 12:05:00	2020-03-20 12:05:00	2020-03-20 12:05:00	2020	3	20	1	1	6918A02D-912D-437C-B64F-8FCBC8DA2369.JPEG	2020-03-20 12:05:00	2020-03-20 12:05:00	2020-03-20 12:05:00	2020	3	20
16	CP288	86	Prod	1097	78	2005	22	Universitätsklinikum Schleswig-Holstein	DE001	World	9237	Product change TP1	0	5849	APP_PRODUCTCHANGE_TP_1	Product change TP1	17		47994	Baseplate change TP 1	0		162750	20	2020-03-22 08:00:09	2020-03-22 08:00:09	2020-07-17 12:52:32	DE001	22	22	1	1	4FD73833-9826-43AB-A53E-DF2A470DF17A.JPEG	2020-03-22 08:36:00	2020-03-22 08:36:00	2020-03-22 08:36:00	2020	3	22	1	1	EE54F2AA-D378-46B6-AF85-A0FC8C319B44.JPEG	2020-03-22 08:37:00	2020-03-22 08:37:00	2020-03-22 08:37:00	2020	3	22
16	CP288	86	Prod	1097	78	2005	22	Universitätsklinikum Schleswig-Holstein	DE001	World	9237	Product change TP1	0	5849	APP_PRODUCTCHANGE_TP_1	Product change TP1	17		47994	Baseplate change TP 1	0		163416	21	2020-03-24 07:00:07	2020-03-24 07:00:07	2020-07-17 12:52:32	DE001	23	23	1	1	DF4357CF-101A-41CD-B6F5-C3F9B76AA4D1.JPEG	2020-03-24 07:40:00	2020-03-24 07:40:00	2020-03-24 07:40:00	2020	3	24	1	1	77CC0F81-ECA3-4380-9CDB-DAFCD275EB54.JPEG	2020-03-24 07:41:00	2020-03-24 07:41:00	2020-03-24 07:41:00	2020	3	24
16	CP288	86	Prod	1097	78	2005	22	Universitätsklinikum Schleswig-Holstein	DE001	World	9237	Product change TP1	0	5849	APP_PRODUCTCHANGE_TP_1	Product change TP1	17		47994	Baseplate change TP 1	0		163868	22	2020-03-26 08:00:07	2020-03-26 08:00:07	2020-07-17 12:52:32	DE001	24	24	1	1	AF81036E-99A6-47A4-82C1-8A3547258C64.JPEG	2020-03-26 08:01:00	2020-03-26 08:01:00	2020-03-26 08:01:00	2020	3	26	1	1	98165E03-A34C-4687-AD57-9E1B144F0A3F.JPEG	2020-03-26 08:02:00	2020-03-26 08:02:00	2020-03-26 08:02:00	2020	3	26
16	CP288	86	Prod	1097	78	2005	22	Universitätsklinikum Schleswig-Holstein	DE001	World	9237	Product change TP1	0	5849	APP_PRODUCTCHANGE_TP_1	Product change TP1	17		47994	Baseplate change TP 1	0		164776	23	2020-03-30 07:00:05	2020-03-30 07:00:05	2020-07-17 12:52:32	DE001	25	25	1	1	178E4081-979F-46D4-AAF7-36A806D9C809.JPEG	2020-03-28 08:06:00	2020-03-28 08:06:00	2020-03-28 08:06:00	2020	3	28	1	1	DA316F7A-6059-4A9F-B30D-F7D08D766198.JPEG	2020-03-28 08:07:00	2020-03-28 08:07:00	2020-03-28 08:07:00	2020	3	28
16	CP288	86	Prod	1097	78	2005	22	Universitätsklinikum Schleswig-Holstein	DE001	World	9237	Product change TP1	0	5849	APP_PRODUCTCHANGE_TP_1	Product change TP1	17		47994	Baseplate change TP 1	0		164947	24	2020-03-31 07:00:09	2020-03-31 07:00:09	2020-07-17 12:52:32	DE001	26	26	1	1	15D15680-7E5E-4BCE-A28E-A55D2EF4B2B0.JPEG	2020-03-31 08:19:00	2020-03-31 08:19:00	2020-03-31 08:19:00	2020	3	31	1	1	176E2CA4-889E-41B3-B6A3-9E6BA894B0C6.JPEG	2020-03-31 08:19:00	2020-03-31 08:19:00	2020-03-31 08:19:00	2020	3	31
16	CP288	86	Prod	1097	78	2005	22	Universitätsklinikum Schleswig-Holstein	DE001	World	9237	Product change TP1	0	5849	APP_PRODUCTCHANGE_TP_1	Product change TP1	17		47994	Baseplate change TP 1	0		168382	25	2020-04-02 07:00:09	2020-04-02 07:00:09	2020-07-17 12:52:32	DE001	27	27	1	1	B1A4D3C8-9F4F-4D2C-A122-CB359923E4D7.JPEG	2020-04-02 08:36:00	2020-04-02 08:36:00	2020-04-02 08:36:00	2020	4	2	1	1	19F016CB-9044-4947-BCF0-889FDF9ECE73.JPEG	2020-04-02 08:37:00	2020-04-02 08:37:00	2020-04-02 08:37:00	2020	4	2
16	CP288	86	Prod	1097	78	2005	22	Universitätsklinikum Schleswig-Holstein	DE001	World	9237	Product change TP1	0	5849	APP_PRODUCTCHANGE_TP_1	Product change TP1	17		47994	Baseplate change TP 1	0		168640	26	2020-04-04 07:00:09	2020-04-04 07:00:09	2020-07-17 12:52:32	DE001	28	28	1	1	2A1EF4DC-011B-44B1-96F1-DB2EB76D8049.JPEG	2020-04-04 08:40:00	2020-04-04 08:40:00	2020-04-04 08:40:00	2020	4	4	1	1	D82505C0-99B0-4878-B0A7-4BDD3D1738EC.JPEG	2020-04-04 08:40:00	2020-04-04 08:40:00	2020-04-04 08:40:00	2020	4	4
16	CP288	86	Prod	1097	78	2005	22	Universitätsklinikum Schleswig-Holstein	DE001	World	9237	Product change TP1	0	5849	APP_PRODUCTCHANGE_TP_1	Product change TP1	17		47994	Baseplate change TP 1	0		168859	27	2020-04-06 07:00:05	2020-04-06 07:00:05	2020-07-17 12:52:32	DE001	29	29	1	1	4E3DD838-D569-4461-A1BB-473C57FCC1C3.JPEG	2020-04-06 08:10:00	2020-04-06 08:10:00	2020-04-06 08:10:00	2020	4	6	1	1	A6508DFC-6BE1-42E2-97D4-CC72DD415BF5.JPEG	2020-04-06 08:11:00	2020-04-06 08:11:00	2020-04-06 08:11:00	2020	4	6
16	CP288	86	Prod	1097	78	2005	22	Universitätsklinikum Schleswig-Holstein	DE001	World	9237	Product change TP1	0	5849	APP_PRODUCTCHANGE_TP_1	Product change TP1	17		47994	Baseplate change TP 1	0		169203	28	2020-04-08 07:00:11	2020-04-08 07:00:11	2020-07-17 12:52:32	DE001	30	30	1	1	9112CDD2-60BF-4300-9B24-51B727DD53A1.JPEG	2020-04-08 08:00:00	2020-04-08 08:00:00	2020-04-08 08:00:00	2020	4	8	1	1	7730C51C-E723-49E2-A2CB-8C50285A3A5B.JPEG	2020-04-08 08:01:00	2020-04-08 08:01:00	2020-04-08 08:01:00	2020	4	8
16	CP288	86	Prod	1097	78	2005	22	Universitätsklinikum Schleswig-Holstein	DE001	World	9237	Product change TP1	0	5849	APP_PRODUCTCHANGE_TP_1	Product change TP1	17		47994	Baseplate change TP 1	0		169364	29	2020-04-10 07:00:05	2020-04-10 07:00:05	2020-07-17 12:52:32	DE001	31	31	1	1	403DD38D-8FD1-4EB3-94D2-A6FDB6107F99.JPEG	2020-04-10 08:27:00	2020-04-10 08:27:00	2020-04-10 08:27:00	2020	4	10	1	1	F809C471-84B2-4160-A528-099E46AE109E.JPEG	2020-04-10 08:27:00	2020-04-10 08:27:00	2020-04-10 08:27:00	2020	4	10
16	CP288	86	Prod	1097	78	2005	22	Universitätsklinikum Schleswig-Holstein	DE001	World	9237	Product change TP1	0	5849	APP_PRODUCTCHANGE_TP_1	Product change TP1	17		47994	Baseplate change TP 1	0		169493	30	2020-04-12 06:00:05	2020-04-12 06:00:05	2020-07-17 12:52:32	DE001	32	32	1	1	770271F5-6233-468D-9DF5-422B4ED4CDE2.JPEG	2020-04-12 07:56:00	2020-04-12 07:56:00	2020-04-12 07:56:00	2020	4	12	1	1	F9328859-04B0-40D5-BFE8-62920B598D2A.JPEG	2020-04-12 07:57:00	2020-04-12 07:57:00	2020-04-12 07:57:00	2020	4	12
16	CP288	86	Prod	1097	78	2005	22	Universitätsklinikum Schleswig-Holstein	DE001	World	9237	Product change TP1	0	5849	APP_PRODUCTCHANGE_TP_1	Product change TP1	17		47994	Baseplate change TP 1	0		169747	31	2020-04-14 07:00:09	2020-04-14 07:00:09	2020-07-17 12:52:32	DE001	33	33	1	1	C33DE0C5-B0F3-492A-828F-95FF15DC5B59.JPEG	2020-04-14 07:58:00	2020-04-14 07:58:00	2020-04-14 07:58:00	2020	4	14	1	1	82C0A5A9-880A-47EA-8148-E2E8CF7B0391.JPEG	2020-04-14 08:04:00	2020-04-14 08:04:00	2020-04-14 08:04:00	2020	4	14
16	CP288	86	Prod	1097	78	2005	22	Universitätsklinikum Schleswig-Holstein	DE001	World	9237	Product change TP1	0	5849	APP_PRODUCTCHANGE_TP_1	Product change TP1	17		47994	Baseplate change TP 1	0		170065	32	2020-04-16 06:00:05	2020-04-16 06:00:05	2020-07-17 12:52:32	DE001	34	34	1	1	9EA69439-3C53-40AA-B032-615D69EE607E.JPEG	2020-04-16 07:57:00	2020-04-16 07:57:00	2020-04-16 07:57:00	2020	4	16	1	1	29D18E43-2475-48B2-9F0A-ED43CEED6F46.JPEG	2020-04-16 07:57:00	2020-04-16 07:57:00	2020-04-16 07:57:00	2020	4	16
16	CP288	86	Prod	1097	78	2005	22	Universitätsklinikum Schleswig-Holstein	DE001	World	9237	Product change TP1	0	5849	APP_PRODUCTCHANGE_TP_1	Product change TP1	17		47994	Baseplate change TP 1	0		171123	33	2020-04-18 07:00:05	2020-04-18 07:00:05	2020-07-17 12:52:32	DE001	35	35	1	1	E5AFA93A-A88E-4513-81F7-11D6A754E03D.JPEG	2020-04-18 08:18:00	2020-04-18 08:18:00	2020-04-18 08:18:00	2020	4	18	1	1	D32B2F6A-518A-4349-9716-5F9CF3AED672.JPEG	2020-04-18 08:19:00	2020-04-18 08:19:00	2020-04-18 08:19:00	2020	4	18
16	CP288	86	Prod	1097	78	2005	22	Universitätsklinikum Schleswig-Holstein	DE001	World	9237	Product change TP1	0	5849	APP_PRODUCTCHANGE_TP_1	Product change TP1	17		47994	Baseplate change TP 1	0		171274	34	2020-04-20 07:00:04	2020-04-20 07:00:04	2020-07-17 12:52:32	DE001	36	36	1	1	72BE2DBA-79FF-4721-AAE5-50CCA14D2846.JPEG	2020-04-20 08:20:00	2020-04-20 08:20:00	2020-04-20 08:20:00	2020	4	20	1	1	F9E78E76-18F3-4D0B-9343-F8B1A9B5D808.JPEG	2020-04-20 08:20:00	2020-04-20 08:20:00	2020-04-20 08:20:00	2020	4	20
16	CP288	86	Prod	1097	78	2005	22	Universitätsklinikum Schleswig-Holstein	DE001	World	9237	Product change TP1	0	5849	APP_PRODUCTCHANGE_TP_1	Product change TP1	17		47994	Baseplate change TP 1	0		171692	35	2020-04-22 07:00:07	2020-04-22 07:00:07	2020-07-17 12:52:32	DE001	37	37	1	1	8CB9E97A-57A2-4642-8118-7CC2A9CCF707.JPEG	2020-04-22 08:07:00	2020-04-22 08:07:00	2020-04-22 08:07:00	2020	4	22	1	1	9773DB2C-8CC8-4FD8-AD8B-0A3B098B48E1.JPEG	2020-04-22 08:07:00	2020-04-22 08:07:00	2020-04-22 08:07:00	2020	4	22
16	CP288	86	Prod	1097	78	2005	22	Universitätsklinikum Schleswig-Holstein	DE001	World	9237	Product change TP1	0	5849	APP_PRODUCTCHANGE_TP_1	Product change TP1	17		47994	Baseplate change TP 1	0		172337	36	2020-04-24 06:00:02	2020-04-24 06:00:02	2020-07-17 12:52:32	DE001	38	38	1	1	5AFD41BC-CAAF-40F6-A122-492380136ECA.JPEG	2020-04-24 07:02:00	2020-04-24 07:02:00	2020-04-24 07:02:00	2020	4	24	1	1	001C1F2C-3E5E-4B29-925F-8443A865B9FA.JPEG	2020-04-24 07:03:00	2020-04-24 07:03:00	2020-04-24 07:03:00	2020	4	24
16	CP288	86	Prod	1097	78	2005	22	Universitätsklinikum Schleswig-Holstein	DE001	World	9237	Product change TP1	0	5849	APP_PRODUCTCHANGE_TP_1	Product change TP1	17		47994	Baseplate change TP 1	0		172495	37	2020-04-26 07:00:21	2020-04-26 07:00:21	2020-07-17 12:52:32	DE001	39	39	1	1	824CE266-DDDB-4267-B0B4-317EF2AD7ACD.JPEG	2020-04-26 08:31:00	2020-04-26 08:31:00	2020-04-26 08:31:00	2020	4	26	1	1	0F2D9D71-28F4-403E-BC3F-AB46EFD15E1E.JPEG	2020-04-26 08:32:00	2020-04-26 08:32:00	2020-04-26 08:32:00	2020	4	26
16	CP288	86	Prod	1097	78	2005	22	Universitätsklinikum Schleswig-Holstein	DE001	World	9237	Product change TP1	0	5849	APP_PRODUCTCHANGE_TP_1	Product change TP1	17		47994	Baseplate change TP 1	0		172668	38	2020-04-28 06:00:06	2020-04-28 06:00:06	2020-07-17 12:52:32	DE001	40	40	1	1	2C596DFB-CD3F-468B-BF94-11D0CAF98D2E.JPEG	2020-04-28 07:36:00	2020-04-28 07:36:00	2020-04-28 07:36:00	2020	4	28	1	1	D2C3DC7D-420B-456A-BDF2-EDFFA80C5490.JPEG	2020-04-28 07:36:00	2020-04-28 07:36:00	2020-04-28 07:36:00	2020	4	28
16	CP288	86	Prod	1097	78	2005	22	Universitätsklinikum Schleswig-Holstein	DE001	World	9237	Product change TP1	0	5849	APP_PRODUCTCHANGE_TP_1	Product change TP1	17		47994	Baseplate change TP 1	0		173324	39	2020-04-30 06:00:02	2020-04-30 06:00:02	2020-07-17 12:52:32	DE001	41	41	1	1	4E9F957D-92E8-4663-B30C-A8D48D6AFDBF.JPEG	2020-04-30 07:57:00	2020-04-30 07:57:00	2020-04-30 07:57:00	2020	4	30	1	1	8E3BC2B8-A296-4453-A132-B5913AC6F897.JPEG	2020-04-30 07:57:00	2020-04-30 07:57:00	2020-04-30 07:57:00	2020	4	30
16	CP288	86	Prod	1100	78	2008	22	Universitätsklinikum Schleswig-Holstein	DE001	World	9330	Product change TP1	0	5849	APP_PRODUCTCHANGE_TP_1	Product change TP1	17		48174	Baseplate change TP 1	0		131588	1	2020-02-18 22:00:04	2020-02-18 22:00:04	2020-07-17 12:52:32	DE001	0	0	1	1	BD2557C6-3AD0-4F1E-A43C-7E42F1C219C8.JPEG	2020-02-18 21:51:00	2020-02-18 21:51:00	2020-02-18 21:51:00	2020	2	18	1	1	6B0A77E4-020F-40FC-AC27-5A58E7416E37.JPEG	2020-02-18 21:52:00	2020-02-18 21:52:00	2020-02-18 21:52:00	2020	2	18
16	CP288	86	Prod	1100	78	2008	22	Universitätsklinikum Schleswig-Holstein	DE001	World	9333	Product change TP2	0	5852	APP_PRODUCTCHANGE_TP_2	Product change TP2	19		48175	Baseplate change TP 1	0		131590	1	2020-03-30 04:00:06	2020-03-30 04:00:06	2020-07-17 12:52:32	DE001	26	26	1	1	F1DE85F8-3A5C-411E-B0BF-A3267D6B73E1.JPEG	2020-03-30 05:47:00	2020-03-30 05:47:00	2020-03-30 05:47:00	2020	3	30	1	1	A371A487-93C8-4DBE-9272-6C706F9F0C7F.JPEG	2020-03-30 05:52:00	2020-03-30 05:52:00	2020-03-30 05:52:00	2020	3	30
16	CP288	86	Prod	1100	78	2008	22	Universitätsklinikum Schleswig-Holstein	DE001	World	9330	Product change TP1	0	5849	APP_PRODUCTCHANGE_TP_1	Product change TP1	17		48174	Baseplate change TP 1	0		152561	2	2020-02-20 21:00:06	2020-02-20 21:00:06	2020-07-17 12:52:32	DE001	1	1	1	1	9462C668-252C-4341-A4BC-A8601CDA752F.JPEG	2020-02-20 20:56:00	2020-02-20 20:56:00	2020-02-20 20:56:00	2020	2	20	1	1	F7FA1375-D3BD-4625-8066-C8AD91574195.JPEG	2020-02-20 20:58:00	2020-02-20 20:58:00	2020-02-20 20:58:00	2020	2	20
16	CP288	86	Prod	1100	78	2008	22	Universitätsklinikum Schleswig-Holstein	DE001	World	9330	Product change TP1	0	5849	APP_PRODUCTCHANGE_TP_1	Product change TP1	17		48174	Baseplate change TP 1	0		152567	3	2020-02-21 06:00:11	2020-02-21 06:00:11	2020-07-17 12:52:32	DE001	2	2	1	1	6A8F96BE-A81A-480A-A642-F641BD41D05B.JPEG	2020-02-21 05:50:00	2020-02-21 05:50:00	2020-02-21 05:50:00	2020	2	21	1	1	3C3EE43A-F5E4-4F6D-A810-D32BFC554322.JPEG	2020-02-21 05:55:00	2020-02-21 05:55:00	2020-02-21 05:55:00	2020	2	21
16	CP288	86	Prod	1100	78	2008	22	Universitätsklinikum Schleswig-Holstein	DE001	World	9330	Product change TP1	0	5849	APP_PRODUCTCHANGE_TP_1	Product change TP1	17		48174	Baseplate change TP 1	0		152815	4	2020-02-24 05:00:05	2020-02-24 05:00:05	2020-07-17 12:52:32	DE001	3	3	1	1	68FC7165-E591-4669-B381-A353EA6F5CD9.JPEG	2020-02-22 14:31:00	2020-02-22 14:31:00	2020-02-22 14:31:00	2020	2	22	1	1	DF221041-E437-4440-8EC0-D63F3CA4B78D.JPEG	2020-02-22 14:39:00	2020-02-22 14:39:00	2020-02-22 14:39:00	2020	2	22
16	CP288	86	Prod	1100	78	2008	22	Universitätsklinikum Schleswig-Holstein	DE001	World	9330	Product change TP1	0	5849	APP_PRODUCTCHANGE_TP_1	Product change TP1	17		48174	Baseplate change TP 1	0		152818	5	2020-02-24 06:00:04	2020-02-24 06:00:04	2020-07-17 12:52:32	DE001	4	4	1	1	FBF480EB-8305-43BE-8EA1-3EEAAC80422D.JPEG	2020-02-24 05:51:00	2020-02-24 05:51:00	2020-02-24 05:51:00	2020	2	24	1	1	861CDE53-C57C-4353-9B24-9D15BDAD7D9B.JPEG	2020-02-24 05:56:00	2020-02-24 05:56:00	2020-02-24 05:56:00	2020	2	24
16	CP288	86	Prod	1100	78	2008	22	Universitätsklinikum Schleswig-Holstein	DE001	World	9330	Product change TP1	0	5849	APP_PRODUCTCHANGE_TP_1	Product change TP1	17		48174	Baseplate change TP 1	0		153212	6	2020-02-25 06:00:04	2020-02-25 06:00:04	2020-07-17 12:52:32	DE001	5	5	1	1	32125F39-EE5D-4BE2-AECB-26ACC7ACD372.JPEG	2020-02-25 05:55:00	2020-02-25 05:55:00	2020-02-25 05:55:00	2020	2	25	1	1	D669ACFA-C6E0-4F0D-916C-A980808C055C.JPEG	2020-02-25 06:00:00	2020-02-25 06:00:00	2020-02-25 06:00:00	2020	2	25
16	CP288	86	Prod	1100	78	2008	22	Universitätsklinikum Schleswig-Holstein	DE001	World	9330	Product change TP1	0	5849	APP_PRODUCTCHANGE_TP_1	Product change TP1	17		48174	Baseplate change TP 1	0		154302	7	2020-02-26 06:00:05	2020-02-26 06:00:05	2020-07-17 12:52:32	DE001	6	6	1	1	2D017A7C-2B8D-4F49-AF8A-F46AE563155E.JPEG	2020-02-26 05:52:00	2020-02-26 05:52:00	2020-02-26 05:52:00	2020	2	26	1	1	6E4D52E4-F117-4E0E-810C-3E75247CF00C.JPEG	2020-02-26 05:57:00	2020-02-26 05:57:00	2020-02-26 05:57:00	2020	2	26
16	CP288	86	Prod	1100	78	2008	22	Universitätsklinikum Schleswig-Holstein	DE001	World	9330	Product change TP1	0	5849	APP_PRODUCTCHANGE_TP_1	Product change TP1	17		48174	Baseplate change TP 1	0		155020	8	2020-03-03 05:00:07	2020-03-03 05:00:07	2020-07-17 12:52:32	DE001	7	7	1	1	98822CB3-1EB9-43D9-927F-E50D2B48643C.JPEG	2020-02-28 14:17:00	2020-02-28 14:17:00	2020-02-28 14:17:00	2020	2	28	1	1	6A1C9581-2D58-40B9-A598-AC457E1C7EAE.JPEG	2020-02-28 14:23:00	2020-02-28 14:23:00	2020-02-28 14:23:00	2020	2	28
16	CP288	86	Prod	1100	78	2008	22	Universitätsklinikum Schleswig-Holstein	DE001	World	9330	Product change TP1	0	5849	APP_PRODUCTCHANGE_TP_1	Product change TP1	17		48174	Baseplate change TP 1	0		156994	9	2020-03-04 06:00:07	2020-03-04 06:00:07	2020-07-17 12:52:32	DE001	8	8	1	1	E695CDBE-DFFC-4024-9FEA-1A198DFD65DC.JPEG	2020-03-03 05:49:00	2020-03-03 05:49:00	2020-03-03 05:49:00	2020	3	3	1	1	EB9901E1-EE54-405C-BA6C-8DE6D88DE6EB.JPEG	2020-03-03 05:55:00	2020-03-03 05:55:00	2020-03-03 05:55:00	2020	3	3
16	CP288	86	Prod	1100	78	2008	22	Universitätsklinikum Schleswig-Holstein	DE001	World	9330	Product change TP1	0	5849	APP_PRODUCTCHANGE_TP_1	Product change TP1	17		48174	Baseplate change TP 1	0		157810	10	2020-03-05 05:00:05	2020-03-05 05:00:05	2020-07-17 12:52:32	DE001	9	9	1	1	CB9B741C-8532-4A4F-B0F0-7CE456A78E1D.JPEG	2020-03-04 06:09:00	2020-03-04 06:09:00	2020-03-04 06:09:00	2020	3	4	1	1	024BD975-01CC-4158-AD9F-9A3DC9623865.JPEG	2020-03-04 06:15:00	2020-03-04 06:15:00	2020-03-04 06:15:00	2020	3	4
16	CP288	86	Prod	1100	78	2008	22	Universitätsklinikum Schleswig-Holstein	DE001	World	9330	Product change TP1	0	5849	APP_PRODUCTCHANGE_TP_1	Product change TP1	17		48174	Baseplate change TP 1	0		158017	11	2020-03-07 20:00:04	2020-03-07 20:00:04	2020-07-17 12:52:32	DE001	10	10	1	1	EEEF226B-BD15-4ABF-937C-85AC424C1DD3.JPEG	2020-03-05 05:52:00	2020-03-05 05:52:00	2020-03-05 05:52:00	2020	3	5	1	1	BFE97FAE-41E7-4915-AAD2-19065A0E72EB.JPEG	2020-03-05 05:58:00	2020-03-05 05:58:00	2020-03-05 05:58:00	2020	3	5
16	CP288	86	Prod	1100	78	2008	22	Universitätsklinikum Schleswig-Holstein	DE001	World	9330	Product change TP1	0	5849	APP_PRODUCTCHANGE_TP_1	Product change TP1	17		48174	Baseplate change TP 1	0		158020	12	2020-03-07 20:00:18	2020-03-07 20:00:18	2020-07-17 12:52:32	DE001	11	11	1	1	D891CF96-554E-46C0-B517-3C82D8E352C1.JPEG	2020-03-07 20:10:00	2020-03-07 20:10:00	2020-03-07 20:10:00	2020	3	7	1	1	0CE08CF4-3D10-491D-8651-FA9084326197.JPEG	2020-03-07 20:15:00	2020-03-07 20:15:00	2020-03-07 20:15:00	2020	3	7
16	CP288	86	Prod	1100	78	2008	22	Universitätsklinikum Schleswig-Holstein	DE001	World	9330	Product change TP1	0	5849	APP_PRODUCTCHANGE_TP_1	Product change TP1	17		48174	Baseplate change TP 1	0		158370	13	2020-03-11 05:00:07	2020-03-11 05:00:07	2020-07-17 12:52:32	DE001	12	12	1	1	80F09FE9-14DA-4C13-A8BB-C441795EA82B.JPEG	2020-03-09 20:36:00	2020-03-09 20:36:00	2020-03-09 20:36:00	2020	3	9	1	1	2A5E2E91-202A-43D9-BFF7-8DEFDB707132.JPEG	2020-03-09 20:42:00	2020-03-09 20:42:00	2020-03-09 20:42:00	2020	3	9
16	CP288	86	Prod	1100	78	2008	22	Universitätsklinikum Schleswig-Holstein	DE001	World	9330	Product change TP1	0	5849	APP_PRODUCTCHANGE_TP_1	Product change TP1	17		48174	Baseplate change TP 1	0		158379	14	2020-03-11 06:00:25	2020-03-11 06:00:25	2020-07-17 12:52:32	DE001	13	13	1	1	1E42BF16-CE1E-4110-B5A1-21AE73432D4D.JPEG	2020-03-11 05:51:00	2020-03-11 05:51:00	2020-03-11 05:51:00	2020	3	11	1	1	3A124EF0-539D-4E95-AB46-ECE416702CEE.JPEG	2020-03-11 05:56:00	2020-03-11 05:56:00	2020-03-11 05:56:00	2020	3	11
16	CP288	86	Prod	1100	78	2008	22	Universitätsklinikum Schleswig-Holstein	DE001	World	9330	Product change TP1	0	5849	APP_PRODUCTCHANGE_TP_1	Product change TP1	17		48174	Baseplate change TP 1	0		158660	15	2020-03-12 20:00:11	2020-03-12 20:00:11	2020-07-17 12:52:32	DE001	14	14	1	1	A6606602-56CC-44B3-8BF3-B526DEA567BC.JPEG	2020-03-12 20:50:00	2020-03-12 20:50:00	2020-03-12 20:50:00	2020	3	12	1	1	1CA66F46-A8EE-4883-A5E4-619DE60DC890.JPEG	2020-03-12 20:54:00	2020-03-12 20:54:00	2020-03-12 20:54:00	2020	3	12
16	CP288	86	Prod	1100	78	2008	22	Universitätsklinikum Schleswig-Holstein	DE001	World	9330	Product change TP1	0	5849	APP_PRODUCTCHANGE_TP_1	Product change TP1	17		48174	Baseplate change TP 1	0		158948	16	2020-03-15 08:00:02	2020-03-15 08:00:02	2020-07-17 12:52:32	DE001	15	15	1	1	9C65DE75-1C1F-4018-A4F3-F5142F700EEA.JPEG	2020-03-15 08:27:00	2020-03-15 08:27:00	2020-03-15 08:27:00	2020	3	15	1	1	6B01E022-D2B5-4B75-8234-38B4F5E641A8.JPEG	2020-03-15 08:32:00	2020-03-15 08:32:00	2020-03-15 08:32:00	2020	3	15
16	CP288	86	Prod	1100	78	2008	22	Universitätsklinikum Schleswig-Holstein	DE001	World	9330	Product change TP1	0	5849	APP_PRODUCTCHANGE_TP_1	Product change TP1	17		48174	Baseplate change TP 1	0		160019	17	2020-03-17 06:00:07	2020-03-17 06:00:07	2020-07-17 12:52:32	DE001	16	16	1	1	BA20EE29-A45E-42DF-8CE6-B41178137561.JPEG	2020-03-17 05:54:00	2020-03-17 05:54:00	2020-03-17 05:54:00	2020	3	17	1	1	64ECDA7B-5E8B-4294-821F-1DE0E4CD0B3F.JPEG	2020-03-17 06:02:00	2020-03-17 06:02:00	2020-03-17 06:02:00	2020	3	17
16	CP288	86	Prod	1100	78	2008	22	Universitätsklinikum Schleswig-Holstein	DE001	World	9330	Product change TP1	0	5849	APP_PRODUCTCHANGE_TP_1	Product change TP1	17		48174	Baseplate change TP 1	0		161653	18	2020-03-18 06:00:09	2020-03-18 06:00:09	2020-07-17 12:52:32	DE001	17	17	1	1	1F250B5E-4E20-455E-8419-C3038869DBCA.JPEG	2020-03-18 05:56:00	2020-03-18 05:56:00	2020-03-18 05:56:00	2020	3	18	1	1	FF4B8EF8-42D3-48FF-9DF5-1801E79BB2EA.JPEG	2020-03-18 06:01:00	2020-03-18 06:01:00	2020-03-18 06:01:00	2020	3	18
16	CP288	86	Prod	1100	78	2008	22	Universitätsklinikum Schleswig-Holstein	DE001	World	9330	Product change TP1	0	5849	APP_PRODUCTCHANGE_TP_1	Product change TP1	17		48174	Baseplate change TP 1	0		161736	19	2020-03-19 08:00:14	2020-03-19 08:00:14	2020-07-17 12:52:32	DE001	18	18	1	1	7276E56A-5101-42FF-92CA-25E07F3FF6B6.JPEG	2020-03-19 07:55:00	2020-03-19 07:55:00	2020-03-19 07:55:00	2020	3	19	1	1	82E2EEDE-9750-4687-BF42-F0ABBF4A5CA2.JPEG	2020-03-19 08:00:00	2020-03-19 08:00:00	2020-03-19 08:00:00	2020	3	19
16	CP288	86	Prod	1100	78	2008	22	Universitätsklinikum Schleswig-Holstein	DE001	World	9330	Product change TP1	0	5849	APP_PRODUCTCHANGE_TP_1	Product change TP1	17		48174	Baseplate change TP 1	0		162249	20	2020-03-20 06:00:04	2020-03-20 06:00:04	2020-07-17 12:52:32	DE001	19	19	1	1	FA82ABD5-0C42-4CDE-8F89-42C9FFF8EE99.JPEG	2020-03-20 05:57:00	2020-03-20 05:57:00	2020-03-20 05:57:00	2020	3	20	1	1	10444B73-1C4F-4BE0-BEFC-CB181CEEBFAD.JPEG	2020-03-20 06:02:00	2020-03-20 06:02:00	2020-03-20 06:02:00	2020	3	20
16	CP288	86	Prod	1100	78	2008	22	Universitätsklinikum Schleswig-Holstein	DE001	World	9330	Product change TP1	0	5849	APP_PRODUCTCHANGE_TP_1	Product change TP1	17		48174	Baseplate change TP 1	0		163583	21	2020-03-25 05:00:08	2020-03-25 05:00:08	2020-07-17 12:52:32	DE001	20	20	1	1	B129D412-B115-4A4B-BA28-2686E3F4E369.JPEG	2020-03-23 05:53:00	2020-03-23 05:53:00	2020-03-23 05:53:00	2020	3	23	1	1	0985B5C6-317C-486A-8D7D-8B32B6C43DAD.JPEG	2020-03-23 06:00:00	2020-03-23 06:00:00	2020-03-23 06:00:00	2020	3	23
16	CP288	86	Prod	1100	78	2008	22	Universitätsklinikum Schleswig-Holstein	DE001	World	9330	Product change TP1	0	5849	APP_PRODUCTCHANGE_TP_1	Product change TP1	17		48174	Baseplate change TP 1	0		164405	22	2020-03-27 05:00:11	2020-03-27 05:00:11	2020-07-17 12:52:32	DE001	21	21	1	1	44047E0F-FA84-4E10-976A-656A06D50E24.JPEG	2020-03-25 05:55:00	2020-03-25 05:55:00	2020-03-25 05:55:00	2020	3	25	1	1	B7CE542B-274F-483C-8231-8EA66568345B.JPEG	2020-03-25 06:01:00	2020-03-25 06:01:00	2020-03-25 06:01:00	2020	3	25
16	CP288	86	Prod	1100	78	2008	22	Universitätsklinikum Schleswig-Holstein	DE001	World	9330	Product change TP1	0	5849	APP_PRODUCTCHANGE_TP_1	Product change TP1	17		48174	Baseplate change TP 1	0		164408	23	2020-03-27 06:00:14	2020-03-27 06:00:14	2020-07-17 12:52:32	DE001	23	23	1	1	A0339D24-2B8D-47CD-AE70-BE85CD7A1098.JPEG	2020-03-27 05:56:00	2020-03-27 05:56:00	2020-03-27 05:56:00	2020	3	27	1	1	8B6EEA7C-FD9C-4AD7-8945-FD7075D4B26E.JPEG	2020-03-27 06:01:00	2020-03-27 06:01:00	2020-03-27 06:01:00	2020	3	27
16	CP288	86	Prod	1100	78	2008	22	Universitätsklinikum Schleswig-Holstein	DE001	World	9330	Product change TP1	0	5849	APP_PRODUCTCHANGE_TP_1	Product change TP1	17		48174	Baseplate change TP 1	0		164558	24	2020-03-28 08:00:08	2020-03-28 08:00:08	2020-07-17 12:52:32	DE001	24	24	1	1	030DCB78-C5B9-4C80-B3D6-0F76240E758C.JPEG	2020-03-28 07:55:00	2020-03-28 07:55:00	2020-03-28 07:55:00	2020	3	28	1	1	6E249C8B-88D3-47B3-A3B1-AFF6393BCF1E.JPEG	2020-03-28 07:59:00	2020-03-28 07:59:00	2020-03-28 07:59:00	2020	3	28
16	CP288	86	Prod	1100	78	2008	22	Universitätsklinikum Schleswig-Holstein	DE001	World	9333	Product change TP2	0	5852	APP_PRODUCTCHANGE_TP_2	Product change TP2	19		48175	Baseplate change TP 1	0		164932	2	2020-03-31 05:00:04	2020-03-31 05:00:04	2020-07-17 12:52:32	DE001	27	27	1	1	FA46EF4F-D309-4DBB-A657-B53798C13F75.JPEG	2020-03-31 05:51:00	2020-03-31 05:51:00	2020-03-31 05:51:00	2020	3	31	1	1	69F6F17B-224D-4429-8F4B-80E7DF1C4D94.JPEG	2020-03-31 05:58:00	2020-03-31 05:58:00	2020-03-31 05:58:00	2020	3	31
16	CP288	86	Prod	1100	78	2008	22	Universitätsklinikum Schleswig-Holstein	DE001	World	9333	Product change TP2	0	5852	APP_PRODUCTCHANGE_TP_2	Product change TP2	19		48175	Baseplate change TP 1	0		165290	3	2020-03-31 20:00:08	2020-03-31 20:00:08	2020-07-17 12:52:32	DE001	28	28	1	1	53FF23ED-0DFB-4A04-AE18-ACE1CE5376F5.JPEG	2020-03-31 20:53:00	2020-03-31 20:53:00	2020-03-31 20:53:00	2020	3	31	1	1	E6DB5297-FC2B-4CEE-8FCC-C6AA237C2AE3.JPEG	2020-03-31 20:59:00	2020-03-31 20:59:00	2020-03-31 20:59:00	2020	3	31
16	CP288	86	Prod	1100	78	2008	22	Universitätsklinikum Schleswig-Holstein	DE001	World	9333	Product change TP2	0	5852	APP_PRODUCTCHANGE_TP_2	Product change TP2	19		48175	Baseplate change TP 1	0		168479	4	2020-04-03 05:00:04	2020-04-03 05:00:04	2020-07-17 12:52:32	DE001	29	29	1	1	69D326F8-6ACB-4FD6-9A70-568155E1E923.JPEG	2020-04-02 08:38:00	2020-04-02 08:38:00	2020-04-02 08:38:00	2020	4	2	1	1	321CA2FB-01F7-4E6E-8BB7-EF86026A4011.JPEG	2020-04-02 08:44:00	2020-04-02 08:44:00	2020-04-02 08:44:00	2020	4	2
16	CP288	86	Prod	1100	78	2008	22	Universitätsklinikum Schleswig-Holstein	DE001	World	9333	Product change TP2	0	5852	APP_PRODUCTCHANGE_TP_2	Product change TP2	19		48175	Baseplate change TP 1	0		168482	5	2020-04-03 05:00:08	2020-04-03 05:00:08	2020-07-17 12:52:32	DE001	30	30	1	1	376BE665-2725-4818-88BB-2BAFB33038B5.JPEG	2020-04-03 05:56:00	2020-04-03 05:56:00	2020-04-03 05:56:00	2020	4	3	1	1	E79A76B0-B6EA-497C-B1B2-4FD740FC75CF.JPEG	2020-04-03 06:00:00	2020-04-03 06:00:00	2020-04-03 06:00:00	2020	4	3
16	CP288	86	Prod	1100	78	2008	22	Universitätsklinikum Schleswig-Holstein	DE001	World	9333	Product change TP2	0	5852	APP_PRODUCTCHANGE_TP_2	Product change TP2	19		48175	Baseplate change TP 1	0		168702	6	2020-04-04 21:00:07	2020-04-04 21:00:07	2020-07-17 12:52:32	DE001	31	31	1	1	71673FEE-CABA-4446-A8CE-9A002C503CFF.JPEG	2020-04-04 08:08:00	2020-04-04 08:08:00	2020-04-04 08:08:00	2020	4	4	1	1	CB5FD475-5531-493C-A726-F40931A11F1B.JPEG	2020-04-04 08:14:00	2020-04-04 08:14:00	2020-04-04 08:14:00	2020	4	4
16	CP288	86	Prod	1100	78	2008	22	Universitätsklinikum Schleswig-Holstein	DE001	World	9333	Product change TP2	0	5852	APP_PRODUCTCHANGE_TP_2	Product change TP2	19		48175	Baseplate change TP 1	0		168705	7	2020-04-04 21:00:13	2020-04-04 21:00:13	2020-07-17 12:52:32	DE001	32	32	1	1	6ACBBC82-048D-4451-A2FF-5613A88B3B8F.JPEG	2020-04-04 22:27:00	2020-04-04 22:27:00	2020-04-04 22:27:00	2020	4	4	1	1	D7F7F6DB-A046-4641-B24F-EB43CE62716B.JPEG	2020-04-04 22:31:00	2020-04-04 22:31:00	2020-04-04 22:31:00	2020	4	4
16	CP288	86	Prod	1101	78	2009	22	Universitätsklinikum Schleswig-Holstein	DE001	World	9361	Product change TP1	0	5849	APP_PRODUCTCHANGE_TP_1	Product change TP1	17		48234	Baseplate change TP 1	0		131668	1	2020-02-19 10:00:06	2020-02-19 10:00:06	2020-07-17 12:52:32	DE001	0	0	1	1	E268D2CE-7826-4F8B-B0FE-B76A6C022478.JPEG	2020-02-19 10:29:00	2020-02-19 10:29:00	2020-02-19 10:29:00	2020	2	19	1	1	2D4B0D5D-765E-4FC9-84D4-6A001BC4067F.JPEG	2020-02-19 10:31:00	2020-02-19 10:31:00	2020-02-19 10:31:00	2020	2	19
16	CP288	86	Prod	1101	78	2009	22	Universitätsklinikum Schleswig-Holstein	DE001	World	9364	Product change TP2	0	5852	APP_PRODUCTCHANGE_TP_2	Product change TP2	19		48235	Baseplate change TP 1	0		131670	1	2020-03-30 12:00:07	2020-03-30 12:00:07	2020-07-17 12:52:32	DE001	14	14	1	1	75D9A35F-952B-4729-9917-3B2EE23C4A1B.JPEG	2020-03-30 13:00:00	2020-03-30 13:00:00	2020-03-30 13:00:00	2020	3	30	1	1	38AE7DA5-1823-47A2-8E00-5FC0EB592C1B.JPEG	2020-03-30 13:02:00	2020-03-30 13:02:00	2020-03-30 13:02:00	2020	3	30
16	CP288	86	Prod	1101	78	2009	22	Universitätsklinikum Schleswig-Holstein	DE001	World	9361	Product change TP1	0	5849	APP_PRODUCTCHANGE_TP_1	Product change TP1	17		48234	Baseplate change TP 1	0		152576	2	2020-02-21 09:00:07	2020-02-21 09:00:07	2020-07-17 12:52:32	DE001	1	1	1	1	ECAAC599-84C4-4152-ACC2-1CA30D8AE85B.JPEG	2020-02-21 09:49:00	2020-02-21 09:49:00	2020-02-21 09:49:00	2020	2	21	1	1	5185C730-4224-4703-9F39-8BF5F29895B5.JPEG	2020-02-21 09:52:00	2020-02-21 09:52:00	2020-02-21 09:52:00	2020	2	21
16	CP288	86	Prod	1101	78	2009	22	Universitätsklinikum Schleswig-Holstein	DE001	World	9361	Product change TP1	0	5849	APP_PRODUCTCHANGE_TP_1	Product change TP1	17		48234	Baseplate change TP 1	0		152801	3	2020-02-23 12:00:08	2020-02-23 12:00:08	2020-07-17 12:52:32	DE001	2	2	1	1	C421F500-4CA0-4A23-BAAF-AAC739D136CF.JPEG	2020-02-23 12:20:00	2020-02-23 12:20:00	2020-02-23 12:20:00	2020	2	23	1	1	C0CAFFDF-EB38-48BE-AF8A-E3318F9497C9.JPEG	2020-02-23 12:22:00	2020-02-23 12:22:00	2020-02-23 12:22:00	2020	2	23
16	CP288	86	Prod	1101	78	2009	22	Universitätsklinikum Schleswig-Holstein	DE001	World	9361	Product change TP1	0	5849	APP_PRODUCTCHANGE_TP_1	Product change TP1	17		48234	Baseplate change TP 1	0		154735	4	2020-02-28 12:00:13	2020-02-28 12:00:13	2020-07-17 12:52:32	DE001	3	3	1	1	7BEECEBE-DFFB-4C0A-8BB3-6177E5E03FD8.JPEG	2020-02-25 12:14:00	2020-02-25 12:14:00	2020-02-25 12:14:00	2020	2	25	1	1	9B4E2108-ACE1-4FFB-A2F9-8D480EB9D8E9.JPEG	2020-02-25 12:15:00	2020-02-25 12:15:00	2020-02-25 12:15:00	2020	2	25
16	CP288	86	Prod	1101	78	2009	22	Universitätsklinikum Schleswig-Holstein	DE001	World	9361	Product change TP1	0	5849	APP_PRODUCTCHANGE_TP_1	Product change TP1	17		48234	Baseplate change TP 1	0		157936	5	2020-03-06 12:00:05	2020-03-06 12:00:05	2020-07-17 12:52:32	DE001	4	4	1	1	BF8C6276-4E91-4930-98AF-24112D8F8086.JPEG	2020-02-28 12:43:00	2020-02-28 12:43:00	2020-02-28 12:43:00	2020	2	28	1	1	68539069-A67C-4B04-885B-E2664313E457.JPEG	2020-02-28 12:44:00	2020-02-28 12:44:00	2020-02-28 12:44:00	2020	2	28
16	CP288	86	Prod	1101	78	2009	22	Universitätsklinikum Schleswig-Holstein	DE001	World	9361	Product change TP1	0	5849	APP_PRODUCTCHANGE_TP_1	Product change TP1	17		48234	Baseplate change TP 1	0		157939	6	2020-03-06 12:00:16	2020-03-06 12:00:16	2020-07-17 12:52:32	DE001	5	5	1	1	74C82756-379D-4906-9658-9B356D745C81.JPEG	2020-03-03 18:07:00	2020-03-03 18:07:00	2020-03-03 18:07:00	2020	3	3	1	1	E2CB3CA0-6A3C-4D5B-B768-F1A3489C03BF.JPEG	2020-03-03 18:09:00	2020-03-03 18:09:00	2020-03-03 18:09:00	2020	3	3
16	CP288	86	Prod	1101	78	2009	22	Universitätsklinikum Schleswig-Holstein	DE001	World	9361	Product change TP1	0	5849	APP_PRODUCTCHANGE_TP_1	Product change TP1	17		48234	Baseplate change TP 1	0		158157	7	2020-03-09 12:00:05	2020-03-09 12:00:05	2020-07-17 12:52:32	DE001	6	6	1	1	F021C4A8-9C1C-44A8-9EA1-6DFA5AAD12E0.JPEG	2020-03-06 12:22:00	2020-03-06 12:22:00	2020-03-06 12:22:00	2020	3	6	1	1	25B33CE6-F577-4A89-B88A-AE415461545C.JPEG	2020-03-06 12:23:00	2020-03-06 12:23:00	2020-03-06 12:23:00	2020	3	6
16	CP288	86	Prod	1101	78	2009	22	Universitätsklinikum Schleswig-Holstein	DE001	World	9361	Product change TP1	0	5849	APP_PRODUCTCHANGE_TP_1	Product change TP1	17		48234	Baseplate change TP 1	0		161198	8	2020-03-17 12:00:02	2020-03-17 12:00:02	2020-07-17 12:52:32	DE001	7	7	1	1	DE15C8F4-EEA7-4EF1-9696-C5AC45E4E763.JPEG	2020-03-09 12:34:00	2020-03-09 12:34:00	2020-03-09 12:34:00	2020	3	9	1	1	9F278621-AF97-4737-9D2A-A37634A06908.JPEG	2020-03-09 12:35:00	2020-03-09 12:35:00	2020-03-09 12:35:00	2020	3	9
16	CP288	86	Prod	1101	78	2009	22	Universitätsklinikum Schleswig-Holstein	DE001	World	9361	Product change TP1	0	5849	APP_PRODUCTCHANGE_TP_1	Product change TP1	17		48234	Baseplate change TP 1	0		161201	9	2020-03-17 12:00:07	2020-03-17 12:00:07	2020-07-17 12:52:32	DE001	8	8	1	1	A20BBC2D-EF75-47D8-8EFA-4046E4258360.JPEG	2020-03-14 15:51:00	2020-03-14 15:51:00	2020-03-14 15:51:00	2020	3	14	1	1	95EA05A9-06C9-4CC3-B858-C1319EFF51F0.JPEG	2020-03-14 15:52:00	2020-03-14 15:52:00	2020-03-14 15:52:00	2020	3	14
16	CP288	86	Prod	1101	78	2009	22	Universitätsklinikum Schleswig-Holstein	DE001	World	9361	Product change TP1	0	5849	APP_PRODUCTCHANGE_TP_1	Product change TP1	17		48234	Baseplate change TP 1	0		162676	10	2020-03-20 17:00:05	2020-03-20 17:00:05	2020-07-17 12:52:32	DE001	9	9	1	1	28929C07-F78A-42A2-A83C-509473E01E63.JPEG	2020-03-17 12:29:00	2020-03-17 12:29:00	2020-03-17 12:29:00	2020	3	17	1	1	1350164B-A4FD-429C-B58E-E2F9E650C798.JPEG	2020-03-17 12:32:00	2020-03-17 12:32:00	2020-03-17 12:32:00	2020	3	17
16	CP288	86	Prod	1101	78	2009	22	Universitätsklinikum Schleswig-Holstein	DE001	World	9361	Product change TP1	0	5849	APP_PRODUCTCHANGE_TP_1	Product change TP1	17		48234	Baseplate change TP 1	0		164878	11	2020-03-30 10:00:07	2020-03-30 10:00:07	2020-07-17 12:52:32	DE001	10	10	1	1	A22B9516-E494-492A-9D8F-EC6F1A4AAA2C.JPEG	2020-03-20 17:32:00	2020-03-20 17:32:00	2020-03-20 17:32:00	2020	3	20	1	1	05891A31-C908-4C78-AF58-BD08B9B83CB5.JPEG	2020-03-20 17:33:00	2020-03-20 17:33:00	2020-03-20 17:33:00	2020	3	20
16	CP288	86	Prod	1101	78	2009	22	Universitätsklinikum Schleswig-Holstein	DE001	World	9361	Product change TP1	0	5849	APP_PRODUCTCHANGE_TP_1	Product change TP1	17		48234	Baseplate change TP 1	0		164881	12	2020-03-30 10:00:11	2020-03-30 10:00:11	2020-07-17 12:52:32	DE001	11	11	1	1	B978F969-690E-4CF7-8FAB-4C08BD7F7F12.JPEG	2020-03-22 17:05:00	2020-03-22 17:05:00	2020-03-22 17:05:00	2020	3	22	1	1	4B258020-7057-40DE-A72A-94DCF620836F.JPEG	2020-03-22 17:07:00	2020-03-22 17:07:00	2020-03-22 17:07:00	2020	3	22
16	CP288	86	Prod	1101	78	2009	22	Universitätsklinikum Schleswig-Holstein	DE001	World	9361	Product change TP1	0	5849	APP_PRODUCTCHANGE_TP_1	Product change TP1	17		48234	Baseplate change TP 1	0		164887	13	2020-03-30 12:00:03	2020-03-30 12:00:03	2020-07-17 12:52:32	DE001	12	12	1	1	1C13451A-2AD8-4BD8-9975-9A94C81BD269.JPEG	2020-03-26 12:46:00	2020-03-26 12:46:00	2020-03-26 12:46:00	2020	3	26	1	1	C8BDB566-A4E4-43DD-9EB3-CD349DFBF8CD.JPEG	2020-03-26 12:48:00	2020-03-26 12:48:00	2020-03-26 12:48:00	2020	3	26
16	CP288	86	Prod	1101	78	2009	22	Universitätsklinikum Schleswig-Holstein	DE001	World	9364	Product change TP2	0	5852	APP_PRODUCTCHANGE_TP_2	Product change TP2	19		48235	Baseplate change TP 1	0		168341	2	2020-04-01 16:00:12	2020-04-01 16:00:12	2020-07-17 12:52:32	DE001	15	15	1	1	E5C5FBEC-CBEB-49B0-99D2-BA2381A13F81.JPEG	2020-04-01 17:05:00	2020-04-01 17:05:00	2020-04-01 17:05:00	2020	4	1	1	1	F4C64B95-F6D1-4B97-BB13-2AC06CB6272C.JPEG	2020-04-01 17:07:00	2020-04-01 17:07:00	2020-04-01 17:07:00	2020	4	1
16	CP288	86	Prod	1101	78	2009	22	Universitätsklinikum Schleswig-Holstein	DE001	World	9364	Product change TP2	0	5852	APP_PRODUCTCHANGE_TP_2	Product change TP2	19		48235	Baseplate change TP 1	0		168957	3	2020-04-07 10:00:05	2020-04-07 10:00:05	2020-07-17 12:52:32	DE001	16	16	1	1	A01D3BDC-E5FC-413B-8D11-243669735787.JPEG	2020-04-04 12:04:00	2020-04-04 12:04:00	2020-04-04 12:04:00	2020	4	4	1	1	9AE73BB8-0BAF-41D8-B691-488B3DEE3A8A.JPEG	2020-04-04 12:05:00	2020-04-04 12:05:00	2020-04-04 12:05:00	2020	4	4
16	CP288	86	Prod	1101	78	2009	22	Universitätsklinikum Schleswig-Holstein	DE001	World	9364	Product change TP2	0	5852	APP_PRODUCTCHANGE_TP_2	Product change TP2	19		48235	Baseplate change TP 1	0		169525	4	2020-04-12 10:00:05	2020-04-12 10:00:05	2020-07-17 12:52:32	DE001	17	17	1	1	44093355-089F-4C45-978B-A7237304497C.JPEG	2020-04-07 11:48:00	2020-04-07 11:48:00	2020-04-07 11:48:00	2020	4	7	1	1	43CD16D7-4331-4B9E-BC74-4341D32AD41B.JPEG	2020-04-07 11:54:00	2020-04-07 11:54:00	2020-04-07 11:54:00	2020	4	7
16	CP288	86	Prod	1101	78	2009	22	Universitätsklinikum Schleswig-Holstein	DE001	World	9364	Product change TP2	0	5852	APP_PRODUCTCHANGE_TP_2	Product change TP2	19		48235	Baseplate change TP 1	0		169528	5	2020-04-12 13:00:07	2020-04-12 13:00:07	2020-07-17 12:52:32	DE001	18	18	1	1	57859363-2EF0-400E-956B-A526014E5B7B.JPEG	2020-04-10 12:09:00	2020-04-10 12:09:00	2020-04-10 12:09:00	2020	4	10	1	1	115907B3-7A67-4BFF-95BC-14AD82359F81.JPEG	2020-04-10 12:10:00	2020-04-10 12:10:00	2020-04-10 12:10:00	2020	4	10
16	CP288	86	Prod	1101	78	2009	22	Universitätsklinikum Schleswig-Holstein	DE001	World	9364	Product change TP2	0	5852	APP_PRODUCTCHANGE_TP_2	Product change TP2	19		48235	Baseplate change TP 1	0		170035	6	2020-04-15 12:00:11	2020-04-15 12:00:11	2020-07-17 12:52:32	DE001	19	19	1	1	15CB2E82-C9B0-438F-8ECE-4026E3B83190.JPEG	2020-04-12 11:39:00	2020-04-12 11:39:00	2020-04-12 11:39:00	2020	4	12	1	1	5E76D2CF-E0D5-40D5-9D8C-20366C15F546.JPEG	2020-04-12 11:41:00	2020-04-12 11:41:00	2020-04-12 11:41:00	2020	4	12
16	CP288	86	Prod	1101	78	2009	22	Universitätsklinikum Schleswig-Holstein	DE001	World	9364	Product change TP2	0	5852	APP_PRODUCTCHANGE_TP_2	Product change TP2	19		48235	Baseplate change TP 1	0		170038	7	2020-04-15 12:00:15	2020-04-15 12:00:15	2020-07-17 12:52:32	DE001	20	20	1	1	0FD57F51-08B0-4B9F-9FA0-733D14C511D6.JPEG	2020-04-15 13:09:00	2020-04-15 13:09:00	2020-04-15 13:09:00	2020	4	15	1	1	D63717FD-65D4-4E74-BB7F-5EE12F30B26D.JPEG	2020-04-15 13:21:00	2020-04-15 13:21:00	2020-04-15 13:21:00	2020	4	15
16	CP288	86	Prod	1101	78	2009	22	Universitätsklinikum Schleswig-Holstein	DE001	World	9364	Product change TP2	0	5852	APP_PRODUCTCHANGE_TP_2	Product change TP2	19		48235	Baseplate change TP 1	0		184253	8	2020-06-11 13:00:07	2020-06-11 13:00:07	2020-07-17 12:52:32	DE001	21	21	1	1	FB03C02F-FF3F-466C-A66A-9973CBEE1C37.JPEG	2020-04-16 14:32:00	2020-04-16 14:32:00	2020-04-16 14:32:00	2020	4	16	1	1	C09221DF-521F-4B0B-BF71-0035F58BB784.JPEG	2020-04-16 14:33:00	2020-04-16 14:33:00	2020-04-16 14:33:00	2020	4	16
16	CP288	86	Prod	1101	78	2009	22	Universitätsklinikum Schleswig-Holstein	DE001	World	9364	Product change TP2	0	5852	APP_PRODUCTCHANGE_TP_2	Product change TP2	19		48235	Baseplate change TP 1	0		184256	9	2020-06-11 13:00:11	2020-06-11 13:00:11	2020-07-17 12:52:32	DE001	22	22	1	1	B2865287-6E71-490A-A2DC-F0ADB5C94D2C.JPEG	2020-04-19 10:59:00	2020-04-19 10:59:00	2020-04-19 10:59:00	2020	4	19	1	1	BB290609-FA25-4191-99DD-3A3D05B1A133.JPEG	2020-04-19 11:00:00	2020-04-19 11:00:00	2020-04-19 11:00:00	2020	4	19
16	CP288	86	Prod	1102	78	2010	22	Universitätsklinikum Schleswig-Holstein	DE001	World	9392	Product change TP1	0	5849	APP_PRODUCTCHANGE_TP_1	Product change TP1	17		48294	Baseplate change TP 1	0		131748	1	2020-02-26 23:00:09	2020-02-26 23:00:09	2020-07-17 12:52:32	DE001	1	1	1	1	015453ED-B34A-4A33-A4F1-5733A8869608.JPEG	2020-02-24 21:03:00	2020-02-24 21:03:00	2020-02-24 21:03:00	2020	2	24	1	1	08B54263-9755-4E51-A6B9-E3EC71C42BF1.JPEG	2020-02-24 21:07:00	2020-02-24 21:07:00	2020-02-24 21:07:00	2020	2	24
16	CP288	86	Prod	1102	78	2010	22	Universitätsklinikum Schleswig-Holstein	DE001	World	9395	Product change TP2	0	5852	APP_PRODUCTCHANGE_TP_2	Product change TP2	19		48295	Baseplate change TP 1	0		131750	1	2020-04-05 13:00:22	2020-04-05 13:00:22	2020-07-17 12:52:32	DE001	20	20	1	1	25DAF55B-4C04-4E87-B8BE-3F7D30094BC2.JPEG	2020-03-31 21:28:00	2020-03-31 21:28:00	2020-03-31 21:28:00	2020	3	31	1	1	17CCA15A-53AC-43E9-8828-D89FEA5C5A73.JPEG	2020-03-31 21:31:00	2020-03-31 21:31:00	2020-03-31 21:31:00	2020	3	31
16	CP288	86	Prod	1102	78	2010	22	Universitätsklinikum Schleswig-Holstein	DE001	World	9392	Product change TP1	0	5849	APP_PRODUCTCHANGE_TP_1	Product change TP1	17		48294	Baseplate change TP 1	0		156908	2	2020-03-03 11:00:04	2020-03-03 11:00:04	2020-07-17 12:52:32	DE001	2	2	1	1	D2F620CC-6177-49D3-A70D-62E844E16C2F.JPEG	2020-02-26 23:10:00	2020-02-26 23:10:00	2020-02-26 23:10:00	2020	2	26	1	1	3A9C123E-56CD-4E29-83C4-A2480B9BEA9B.JPEG	2020-02-26 23:14:00	2020-02-26 23:14:00	2020-02-26 23:14:00	2020	2	26
16	CP288	86	Prod	1102	78	2010	22	Universitätsklinikum Schleswig-Holstein	DE001	World	9392	Product change TP1	0	5849	APP_PRODUCTCHANGE_TP_1	Product change TP1	17		48294	Baseplate change TP 1	0		156911	3	2020-03-03 11:00:12	2020-03-03 11:00:12	2020-07-17 12:52:32	DE001	4	4	1	1	62AFB662-17D2-4AF7-A646-5AADEB3DA751.JPEG	2020-02-29 20:58:00	2020-02-29 20:58:00	2020-02-29 20:58:00	2020	2	29	1	1	04411521-5B27-40AC-B688-AA9596A0F17C.JPEG	2020-02-29 21:00:00	2020-02-29 21:00:00	2020-02-29 21:00:00	2020	2	29
16	CP288	86	Prod	1102	78	2010	22	Universitätsklinikum Schleswig-Holstein	DE001	World	9392	Product change TP1	0	5849	APP_PRODUCTCHANGE_TP_1	Product change TP1	17		48294	Baseplate change TP 1	0		156914	4	2020-03-03 12:00:03	2020-03-03 12:00:03	2020-07-17 12:52:32	DE001	3	3	1	1	07D48071-D54B-42C3-851D-0BB7797C03DF.JPEG	2020-02-28 19:31:00	2020-02-28 19:31:00	2020-02-28 19:31:00	2020	2	28	1	1	E326AD53-033A-49F6-BCD3-9A65E2A19860.JPEG	2020-02-28 19:33:00	2020-02-28 19:33:00	2020-02-28 19:33:00	2020	2	28
16	CP288	86	Prod	1102	78	2010	22	Universitätsklinikum Schleswig-Holstein	DE001	World	9392	Product change TP1	0	5849	APP_PRODUCTCHANGE_TP_1	Product change TP1	17		48294	Baseplate change TP 1	0		158358	5	2020-03-10 22:00:09	2020-03-10 22:00:09	2020-07-17 12:52:32	DE001	5	5	1	1	78022B8A-D283-4F03-BAD6-BA0E2DC1026D.JPEG	2020-03-03 11:08:00	2020-03-03 11:08:00	2020-03-03 11:08:00	2020	3	3	1	1	FE9C9F4D-617C-4D03-8D0A-C52305633B72.JPEG	2020-03-03 11:12:00	2020-03-03 11:12:00	2020-03-03 11:12:00	2020	3	3
16	CP288	86	Prod	1102	78	2010	22	Universitätsklinikum Schleswig-Holstein	DE001	World	9392	Product change TP1	0	5849	APP_PRODUCTCHANGE_TP_1	Product change TP1	17		48294	Baseplate change TP 1	0		158361	6	2020-03-10 22:00:16	2020-03-10 22:00:16	2020-07-17 12:52:32	DE001	6	6	1	1	2C80E8BE-D5F4-45CC-894C-44E0C660BBC4.JPEG	2020-03-05 18:57:00	2020-03-05 18:57:00	2020-03-05 18:57:00	2020	3	5	1	1	C1FE7D9E-BFAC-4939-A7DA-3F31F2047DA2.JPEG	2020-03-05 19:00:00	2020-03-05 19:00:00	2020-03-05 19:00:00	2020	3	5
16	CP288	86	Prod	1102	78	2010	22	Universitätsklinikum Schleswig-Holstein	DE001	World	9392	Product change TP1	0	5849	APP_PRODUCTCHANGE_TP_1	Product change TP1	17		48294	Baseplate change TP 1	0		158373	7	2020-03-11 05:00:13	2020-03-11 05:00:13	2020-07-17 12:52:32	DE001	7	7	1	1	AFB1968A-CEA7-4459-BE6E-5A26E6FC65BE.JPEG	2020-03-08 11:01:00	2020-03-08 11:01:00	2020-03-08 11:01:00	2020	3	8	1	1	E23D61B4-6AE2-453D-B323-D546004409AE.JPEG	2020-03-08 11:02:00	2020-03-08 11:02:00	2020-03-08 11:02:00	2020	3	8
16	CP288	86	Prod	1102	78	2010	22	Universitätsklinikum Schleswig-Holstein	DE001	World	9392	Product change TP1	0	5849	APP_PRODUCTCHANGE_TP_1	Product change TP1	17		48294	Baseplate change TP 1	0		158669	8	2020-03-12 23:00:08	2020-03-12 23:00:08	2020-07-17 12:52:32	DE001	8	8	1	1	96D92F97-6329-431C-928D-53B58549C8F5.JPEG	2020-03-10 22:08:00	2020-03-10 22:08:00	2020-03-10 22:08:00	2020	3	10	1	1	A77B41B6-52B6-4C93-B061-4A6601069B2C.JPEG	2020-03-10 22:09:00	2020-03-10 22:09:00	2020-03-10 22:09:00	2020	3	10
16	CP288	86	Prod	1102	78	2010	22	Universitätsklinikum Schleswig-Holstein	DE001	World	9392	Product change TP1	0	5849	APP_PRODUCTCHANGE_TP_1	Product change TP1	17		48294	Baseplate change TP 1	0		158672	9	2020-03-12 23:00:12	2020-03-12 23:00:12	2020-07-17 12:52:32	DE001	9	9	1	1	BBD980E2-AD85-4467-957D-1D4B8C0D65AD.JPEG	2020-03-12 22:57:00	2020-03-12 22:57:00	2020-03-12 22:57:00	2020	3	12	1	1	BDB18F9F-F71A-477A-873C-E2F62B43D0E2.JPEG	2020-03-12 22:59:00	2020-03-12 22:59:00	2020-03-12 22:59:00	2020	3	12
16	CP288	86	Prod	1102	78	2010	22	Universitätsklinikum Schleswig-Holstein	DE001	World	9392	Product change TP1	0	5849	APP_PRODUCTCHANGE_TP_1	Product change TP1	17		48294	Baseplate change TP 1	0		160014	10	2020-03-16 21:00:11	2020-03-16 21:00:11	2020-07-17 12:52:32	DE001	10	10	1	1	CC03631E-CC7D-40F9-9B64-6D0A19FA1134.JPEG	2020-03-15 10:58:00	2020-03-15 10:58:00	2020-03-15 10:58:00	2020	3	15	1	1	F3E086AB-5B60-4A44-B728-A09DE9693287.JPEG	2020-03-15 11:00:00	2020-03-15 11:00:00	2020-03-15 11:00:00	2020	3	15
16	CP288	86	Prod	1102	78	2010	22	Universitätsklinikum Schleswig-Holstein	DE001	World	9392	Product change TP1	0	5849	APP_PRODUCTCHANGE_TP_1	Product change TP1	17		48294	Baseplate change TP 1	0		163395	11	2020-03-23 22:00:04	2020-03-23 22:00:04	2020-07-17 12:52:32	DE001	11	11	1	1	8FC4E8D7-BFCC-47B5-8083-00668E7F4674.JPEG	2020-03-16 21:43:00	2020-03-16 21:43:00	2020-03-16 21:43:00	2020	3	16	1	1	4C9BCAAA-0305-4E73-9E65-8D42050B708C.JPEG	2020-03-16 21:45:00	2020-03-16 21:45:00	2020-03-16 21:45:00	2020	3	16
16	CP288	86	Prod	1102	78	2010	22	Universitätsklinikum Schleswig-Holstein	DE001	World	9392	Product change TP1	0	5849	APP_PRODUCTCHANGE_TP_1	Product change TP1	17		48294	Baseplate change TP 1	0		163398	12	2020-03-23 22:00:08	2020-03-23 22:00:08	2020-07-17 12:52:32	DE001	12	12	1	1	4917BDFB-2946-42E6-928E-CC5A1C4CE267.JPEG	2020-03-18 19:39:00	2020-03-18 19:39:00	2020-03-18 19:39:00	2020	3	18	1	1	FA6B05FD-0DCE-4218-9A22-E34B4918010F.JPEG	2020-03-18 19:40:00	2020-03-18 19:40:00	2020-03-18 19:40:00	2020	3	18
16	CP288	86	Prod	1102	78	2010	22	Universitätsklinikum Schleswig-Holstein	DE001	World	9392	Product change TP1	0	5849	APP_PRODUCTCHANGE_TP_1	Product change TP1	17		48294	Baseplate change TP 1	0		163407	13	2020-03-24 04:00:07	2020-03-24 04:00:07	2020-07-17 12:52:32	DE001	13	13	1	1	B2E73DEA-1007-41E2-AA84-FCC268CA072E.JPEG	2020-03-20 20:40:00	2020-03-20 20:40:00	2020-03-20 20:40:00	2020	3	20	1	1	0480FACB-1BC9-4E01-A353-A703E207F211.JPEG	2020-03-20 20:41:00	2020-03-20 20:41:00	2020-03-20 20:41:00	2020	3	20
16	CP288	86	Prod	1102	78	2010	22	Universitätsklinikum Schleswig-Holstein	DE001	World	9392	Product change TP1	0	5849	APP_PRODUCTCHANGE_TP_1	Product change TP1	17		48294	Baseplate change TP 1	0		163419	14	2020-03-24 07:00:10	2020-03-24 07:00:10	2020-07-17 12:52:32	DE001	14	14	1	1	0360A7A7-BA93-4FB8-86F0-360D3ABACE2C.JPEG	2020-03-22 17:50:00	2020-03-22 17:50:00	2020-03-22 17:50:00	2020	3	22	1	1	D7D995CF-87D5-44DB-9452-26BB581DD877.JPEG	2020-03-22 17:51:00	2020-03-22 17:51:00	2020-03-22 17:51:00	2020	3	22
16	CP288	86	Prod	1102	78	2010	22	Universitätsklinikum Schleswig-Holstein	DE001	World	9392	Product change TP1	0	5849	APP_PRODUCTCHANGE_TP_1	Product change TP1	17		48294	Baseplate change TP 1	0		164526	15	2020-03-27 14:00:05	2020-03-27 14:00:05	2020-07-17 12:52:32	DE001	15	15	1	1	1F6379F4-B522-4E6F-B0D1-32BE6CFCFF7D.JPEG	2020-03-23 22:43:00	2020-03-23 22:43:00	2020-03-23 22:43:00	2020	3	23	1	1	3AA1624D-42EF-4517-8601-B4E0F345AAAE.JPEG	2020-03-23 22:45:00	2020-03-23 22:45:00	2020-03-23 22:45:00	2020	3	23
16	CP288	86	Prod	1102	78	2010	22	Universitätsklinikum Schleswig-Holstein	DE001	World	9392	Product change TP1	0	5849	APP_PRODUCTCHANGE_TP_1	Product change TP1	17		48294	Baseplate change TP 1	0		164662	16	2020-03-29 17:00:14	2020-03-29 17:00:14	2020-07-17 12:52:32	DE001	16	16	1	1	0DDB27E0-5683-480C-945C-59113FC1FEB2.JPEG	2020-03-27 14:25:00	2020-03-27 14:25:00	2020-03-27 14:25:00	2020	3	27	1	1	701DC843-4156-4C1B-BDB3-F5D7A6DAC0EC.JPEG	2020-03-27 14:27:00	2020-03-27 14:27:00	2020-03-27 14:27:00	2020	3	27
16	CP288	86	Prod	1102	78	2010	22	Universitätsklinikum Schleswig-Holstein	DE001	World	9392	Product change TP1	0	5849	APP_PRODUCTCHANGE_TP_1	Product change TP1	17		48294	Baseplate change TP 1	0		168805	17	2020-04-05 13:00:08	2020-04-05 13:00:08	2020-07-17 12:52:32	DE001	17	17	1	1	0E536515-43B8-455F-A0BA-1B12C55A9BD5.JPEG	2020-03-29 18:53:00	2020-03-29 18:53:00	2020-03-29 18:53:00	2020	3	29	1	1	D5F8FC9B-F744-4A1B-8FD0-170542082CF5.JPEG	2020-03-29 18:55:00	2020-03-29 18:55:00	2020-03-29 18:55:00	2020	3	29
16	CP288	86	Prod	1102	78	2010	22	Universitätsklinikum Schleswig-Holstein	DE001	World	9395	Product change TP2	0	5852	APP_PRODUCTCHANGE_TP_2	Product change TP2	19		48295	Baseplate change TP 1	0		168810	2	2020-04-05 15:00:04	2020-04-05 15:00:04	2020-07-17 12:52:32	DE001	21	21	1	1	2367C9A0-CDAE-4C15-9370-1FD9C176A76E.JPEG	2020-04-02 18:12:00	2020-04-02 18:12:00	2020-04-02 18:12:00	2020	4	2	1	1	98BE73DB-0CC7-4E26-99E4-714F2DCF10D5.JPEG	2020-04-02 18:13:00	2020-04-02 18:13:00	2020-04-02 18:13:00	2020	4	2
16	CP288	86	Prod	1102	78	2010	22	Universitätsklinikum Schleswig-Holstein	DE001	World	9395	Product change TP2	0	5852	APP_PRODUCTCHANGE_TP_2	Product change TP2	19		48295	Baseplate change TP 1	0		169314	3	2020-04-09 09:00:05	2020-04-09 09:00:05	2020-07-17 12:52:32	DE001	22	22	1	1	8FB40E6D-9636-4FD0-9EA5-76B8F343C375.JPEG	2020-04-05 14:07:00	2020-04-05 14:07:00	2020-04-05 14:07:00	2020	4	5	1	1	955C8B09-8AB0-4473-9E6D-25247D62297C.JPEG	2020-04-05 14:09:00	2020-04-05 14:09:00	2020-04-05 14:09:00	2020	4	5
16	CP288	86	Prod	1102	78	2010	22	Universitätsklinikum Schleswig-Holstein	DE001	World	9395	Product change TP2	0	5852	APP_PRODUCTCHANGE_TP_2	Product change TP2	19		48295	Baseplate change TP 1	0		169317	4	2020-04-09 10:00:08	2020-04-09 10:00:08	2020-07-17 12:52:32	DE001	23	23	1	1	34D11F8C-E363-48BE-A2ED-35948C3AF42A.JPEG	2020-04-07 20:33:00	2020-04-07 20:33:00	2020-04-07 20:33:00	2020	4	7	1	1	1E34473B-8F2C-419C-83B3-623B6583742A.JPEG	2020-04-07 20:37:00	2020-04-07 20:37:00	2020-04-07 20:37:00	2020	4	7
16	CP288	86	Prod	1102	78	2010	22	Universitätsklinikum Schleswig-Holstein	DE001	World	9395	Product change TP2	0	5852	APP_PRODUCTCHANGE_TP_2	Product change TP2	19		48295	Baseplate change TP 1	0		169537	5	2020-04-12 16:00:04	2020-04-12 16:00:04	2020-07-17 12:52:32	DE001	24	24	1	1	D7DFBA77-B8AF-495A-A2E7-D880264100A3.JPEG	2020-04-09 10:20:00	2020-04-09 10:20:00	2020-04-09 10:20:00	2020	4	9	1	1	FE7013F6-10AA-4177-9EE7-A165F91068AF.JPEG	2020-04-09 10:24:00	2020-04-09 10:24:00	2020-04-09 10:24:00	2020	4	9
16	CP288	86	Prod	1102	78	2010	22	Universitätsklinikum Schleswig-Holstein	DE001	World	9395	Product change TP2	0	5852	APP_PRODUCTCHANGE_TP_2	Product change TP2	19		48295	Baseplate change TP 1	0		169546	6	2020-04-12 21:00:11	2020-04-12 21:00:11	2020-07-17 12:52:32	DE001	25	25	1	1	A785CD33-32C4-45DF-8DCD-E1C14B4F5B64.JPEG	2020-04-10 19:23:00	2020-04-10 19:23:00	2020-04-10 19:23:00	2020	4	10	1	1	D4878F26-7D90-45B1-95B6-C58FFEEC6404.JPEG	2020-04-10 19:26:00	2020-04-10 19:26:00	2020-04-10 19:26:00	2020	4	10
16	CP288	86	Prod	1102	78	2010	22	Universitätsklinikum Schleswig-Holstein	DE001	World	9395	Product change TP2	0	5852	APP_PRODUCTCHANGE_TP_2	Product change TP2	19		48295	Baseplate change TP 1	0		169634	7	2020-04-13 21:00:05	2020-04-13 21:00:05	2020-07-17 12:52:32	DE001	26	26	1	1	CFB749F3-C618-4FD8-9E82-A4126CA3EB63.JPEG	2020-04-12 14:31:00	2020-04-12 14:31:00	2020-04-12 14:31:00	2020	4	12	1	1	050D9CEA-20E2-49BB-9175-0FE11B61B94B.JPEG	2020-04-12 14:34:00	2020-04-12 14:34:00	2020-04-12 14:34:00	2020	4	12
16	CP288	86	Prod	1102	78	2010	22	Universitätsklinikum Schleswig-Holstein	DE001	World	9395	Product change TP2	0	5852	APP_PRODUCTCHANGE_TP_2	Product change TP2	19		48295	Baseplate change TP 1	0		171639	8	2020-04-21 21:00:05	2020-04-21 21:00:05	2020-07-17 12:52:32	DE001	27	27	1	1	AEA41D11-61BB-46E4-9BE0-17AFA1641CB3.JPEG	2020-04-13 22:03:00	2020-04-13 22:03:00	2020-04-13 22:03:00	2020	4	13	1	1	D57B724E-92CC-440A-A7F3-A1E0DE1DE120.JPEG	2020-04-13 22:08:00	2020-04-13 22:08:00	2020-04-13 22:08:00	2020	4	13
16	CP288	86	Prod	1102	78	2010	22	Universitätsklinikum Schleswig-Holstein	DE001	World	9395	Product change TP2	0	5852	APP_PRODUCTCHANGE_TP_2	Product change TP2	19		48295	Baseplate change TP 1	0		171642	9	2020-04-21 21:00:19	2020-04-21 21:00:19	2020-07-17 12:52:32	DE001	29	29	1	1	32E6D62F-AE12-4A74-8752-DD339A8224C0.JPEG	2020-04-16 21:13:00	2020-04-16 21:13:00	2020-04-16 21:13:00	2020	4	16	1	1	488B3BC3-C696-4BDE-9EAD-7E3590F470BE.JPEG	2020-04-16 21:17:00	2020-04-16 21:17:00	2020-04-16 21:17:00	2020	4	16
16	CP288	86	Prod	1102	78	2010	22	Universitätsklinikum Schleswig-Holstein	DE001	World	9395	Product change TP2	0	5852	APP_PRODUCTCHANGE_TP_2	Product change TP2	19		48295	Baseplate change TP 1	0		171651	10	2020-04-22 05:00:05	2020-04-22 05:00:05	2020-07-17 12:52:32	DE001	30	30	1	1	72C3DB0C-1945-4B35-A8AC-7790B2306768.JPEG	2020-04-19 17:28:00	2020-04-19 17:28:00	2020-04-19 17:28:00	2020	4	19	1	1	7F0CB3B5-4FC6-44C5-B796-15099D276100.JPEG	2020-04-19 17:31:00	2020-04-19 17:31:00	2020-04-19 17:31:00	2020	4	19
16	CP288	86	Prod	1102	78	2010	22	Universitätsklinikum Schleswig-Holstein	DE001	World	9395	Product change TP2	0	5852	APP_PRODUCTCHANGE_TP_2	Product change TP2	19		48295	Baseplate change TP 1	0		172507	11	2020-04-26 10:00:17	2020-04-26 10:00:17	2020-07-17 12:52:32	DE001	31	31	1	1	156A0067-9B6A-445A-B3B9-63C3E5DAD6FE.JPEG	2020-04-21 22:24:00	2020-04-21 22:24:00	2020-04-21 22:24:00	2020	4	21	1	1	0822298F-8CA8-4218-B605-1682CF9C1CB0.JPEG	2020-04-21 22:27:00	2020-04-21 22:27:00	2020-04-21 22:27:00	2020	4	21
16	CP288	86	Prod	1102	78	2010	22	Universitätsklinikum Schleswig-Holstein	DE001	World	9395	Product change TP2	0	5852	APP_PRODUCTCHANGE_TP_2	Product change TP2	19		48295	Baseplate change TP 1	0		172510	12	2020-04-26 10:00:23	2020-04-26 10:00:23	2020-07-17 12:52:32	DE001	32	32	1	1	41EC826E-A0CE-45B1-9CDF-3178A5465325.JPEG	2020-04-22 20:41:00	2020-04-22 20:41:00	2020-04-22 20:41:00	2020	4	22	1	1	142C3AB3-EB7F-4CA7-AE61-17018AA976E3.JPEG	2020-04-22 20:43:00	2020-04-22 20:43:00	2020-04-22 20:43:00	2020	4	22
16	CP288	86	Prod	1102	78	2010	22	Universitätsklinikum Schleswig-Holstein	DE001	World	9395	Product change TP2	0	5852	APP_PRODUCTCHANGE_TP_2	Product change TP2	19		48295	Baseplate change TP 1	0		172629	13	2020-04-27 18:00:05	2020-04-27 18:00:05	2020-07-17 12:52:32	DE001	34	34	1	1	04B66F11-7955-4F4E-8BF5-8FE69C80126B.JPEG	2020-04-26 11:11:00	2020-04-26 11:11:00	2020-04-26 11:11:00	2020	4	26	1	1	2D203316-FEE8-41D0-B8EF-BD9CDFF4F78C.JPEG	2020-04-26 11:14:00	2020-04-26 11:14:00	2020-04-26 11:14:00	2020	4	26
16	CP288	86	Prod	1102	78	2010	22	Universitätsklinikum Schleswig-Holstein	DE001	World	9395	Product change TP2	0	5852	APP_PRODUCTCHANGE_TP_2	Product change TP2	19		48295	Baseplate change TP 1	0		173306	14	2020-04-29 19:00:15	2020-04-29 19:00:15	2020-07-17 12:52:32	DE001	35	35	1	1	C352EBC8-503B-4F3A-90DA-B9C3A99562D7.JPEG	2020-04-27 19:30:00	2020-04-27 19:30:00	2020-04-27 19:30:00	2020	4	27	1	1	5F6FD62C-F75B-4A8E-955E-C23ABBFFCC08.JPEG	2020-04-27 19:31:00	2020-04-27 19:31:00	2020-04-27 19:31:00	2020	4	27
16	CP288	86	Prod	1102	78	2010	22	Universitätsklinikum Schleswig-Holstein	DE001	World	9395	Product change TP2	0	5852	APP_PRODUCTCHANGE_TP_2	Product change TP2	19		48295	Baseplate change TP 1	0		173309	15	2020-04-29 20:00:04	2020-04-29 20:00:04	2020-07-17 12:52:32	DE001	36	36	1	1	52E52CFE-5A05-4048-8613-FE3EB7C3275F.JPEG	2020-04-28 07:58:00	2020-04-28 07:58:00	2020-04-28 07:58:00	2020	4	28	1	1	596211D2-DAD9-4A6E-A936-86B248385474.JPEG	2020-04-28 08:01:00	2020-04-28 08:01:00	2020-04-28 08:01:00	2020	4	28
16	CP288	86	Prod	1102	78	2010	22	Universitätsklinikum Schleswig-Holstein	DE001	World	9395	Product change TP2	0	5852	APP_PRODUCTCHANGE_TP_2	Product change TP2	19		48295	Baseplate change TP 1	0		173797	16	2020-05-02 18:00:05	2020-05-02 18:00:05	2020-07-17 12:52:32	DE001	37	37	1	1	0B6E16FF-BE14-486C-B8B1-E6D3AACE7117.JPEG	2020-04-29 20:28:00	2020-04-29 20:28:00	2020-04-29 20:28:00	2020	4	29	1	1	B531F543-AB9F-4D66-A22D-7CCB32BDD4AD.JPEG	2020-04-29 20:32:00	2020-04-29 20:32:00	2020-04-29 20:32:00	2020	4	29
16	CP288	86	Prod	1102	78	2010	22	Universitätsklinikum Schleswig-Holstein	DE001	World	9395	Product change TP2	0	5852	APP_PRODUCTCHANGE_TP_2	Product change TP2	19		48295	Baseplate change TP 1	0		174808	17	2020-05-10 13:00:05	2020-05-10 13:00:05	2020-07-17 12:52:32	DE001	38	38	1	1	A21465E6-2A4F-4784-AFC4-076704114787.JPEG	2020-05-02 18:59:00	2020-05-02 18:59:00	2020-05-02 18:59:00	2020	5	2	1	1	4B6008E7-982E-42C2-9315-4EEC5058DAE6.JPEG	2020-05-02 19:01:00	2020-05-02 19:01:00	2020-05-02 19:01:00	2020	5	2
16	CP288	86	Prod	1102	78	2010	22	Universitätsklinikum Schleswig-Holstein	DE001	World	9395	Product change TP2	0	5852	APP_PRODUCTCHANGE_TP_2	Product change TP2	19		48295	Baseplate change TP 1	0		174811	18	2020-05-10 13:00:17	2020-05-10 13:00:17	2020-07-17 12:52:32	DE001	40	40	1	1	B41C5C3A-12ED-4CBC-9E1E-C15B083202E0.JPEG	2020-05-05 22:38:00	2020-05-05 22:38:00	2020-05-05 22:38:00	2020	5	5	1	1	CE4938F0-14E8-4846-9652-645692AECB8A.JPEG	2020-05-05 22:38:00	2020-05-05 22:38:00	2020-05-05 22:38:00	2020	5	5
16	CP288	86	Prod	1102	78	2010	22	Universitätsklinikum Schleswig-Holstein	DE001	World	9395	Product change TP2	0	5852	APP_PRODUCTCHANGE_TP_2	Product change TP2	19		48295	Baseplate change TP 1	0		174955	19	2020-05-10 18:00:06	2020-05-10 18:00:06	2020-07-17 12:52:32	DE001	41	41	1	1	6A12A200-C72A-48A6-8C2F-C67FE9E5F3EF.JPEG	2020-05-08 20:08:00	2020-05-08 20:08:00	2020-05-08 20:08:00	2020	5	8	1	1	B7B9AF4B-E82C-4B2F-B26D-AAC0A81A2073.JPEG	2020-05-08 20:12:00	2020-05-08 20:12:00	2020-05-08 20:12:00	2020	5	8
16	CP288	86	Prod	1102	78	2010	22	Universitätsklinikum Schleswig-Holstein	DE001	World	9395	Product change TP2	0	5852	APP_PRODUCTCHANGE_TP_2	Product change TP2	19		48295	Baseplate change TP 1	0		184250	20	2020-06-11 09:00:05	2020-06-11 09:00:05	2020-07-17 12:52:32	DE001	42	42	1	1	9A95759F-E91C-4BF1-9415-CAB181B0176F.JPEG	2020-05-10 14:13:00	2020-05-10 14:13:00	2020-05-10 14:13:00	2020	5	10	1	1	9838B2CD-1FF1-4FB5-BA3B-ED7F9DF0F78A.JPEG	2020-05-10 14:16:00	2020-05-10 14:16:00	2020-05-10 14:16:00	2020	5	10
16	CP288	86	Prod	1103	81	2041	23	Klinikum der Universitat Munchen- Grosshadern	DE002	World	9423	Product change TP1	0	5849	APP_PRODUCTCHANGE_TP_1	Product change TP1	17		48354	Baseplate change TP 1	0		131828	1	2020-01-25 10:00:08	2020-01-25 10:00:08	2020-07-17 12:52:32	DE002	2	2	1	1	5B339C34-D590-454A-AC61-4FDC3AA85A85.JPEG	2020-01-25 09:58:00	2020-01-25 09:58:00	2020-01-25 09:58:00	2020	1	25	1	1	08CDF35E-EBC6-4AA7-8C7F-F9F3F94A6B7B.JPEG	2020-01-25 09:59:00	2020-01-25 09:59:00	2020-01-25 09:59:00	2020	1	25
16	CP288	86	Prod	1103	81	2041	23	Klinikum der Universitat Munchen- Grosshadern	DE002	World	9426	Product change TP2	0	5852	APP_PRODUCTCHANGE_TP_2	Product change TP2	19		48355	Baseplate change TP 1	0		131830	1	2020-06-29 15:00:17	2020-06-29 15:00:17	2020-07-17 12:52:32	DE002	39	39	1	1	3734DE09-E1F9-4B79-AC1C-6B13FB12F99B.JPEG	2020-03-23 06:10:00	2020-03-23 06:10:00	2020-03-23 06:10:00	2020	3	23	1	1	63D98C2D-A0BA-452F-92DA-C3C40240B171.JPEG	2020-03-23 06:12:00	2020-03-23 06:12:00	2020-03-23 06:12:00	2020	3	23
16	CP288	86	Prod	1103	81	2041	23	Klinikum der Universitat Munchen- Grosshadern	DE002	World	9423	Product change TP1	0	5849	APP_PRODUCTCHANGE_TP_1	Product change TP1	17		48354	Baseplate change TP 1	0		143240	2	2020-01-26 08:00:15	2020-01-26 08:00:15	2020-07-17 12:52:32	DE002	3	3	1	1	28E4696D-DC6B-45C9-9987-347F6AE55255.JPEG	2020-01-26 07:59:00	2020-01-26 07:59:00	2020-01-26 07:59:00	2020	1	26	1	1	C0A93738-CD4F-46FA-A244-5E0B887A4503.JPEG	2020-01-26 08:00:00	2020-01-26 08:00:00	2020-01-26 08:00:00	2020	1	26
16	CP288	86	Prod	1103	81	2041	23	Klinikum der Universitat Munchen- Grosshadern	DE002	World	9423	Product change TP1	0	5849	APP_PRODUCTCHANGE_TP_1	Product change TP1	17		48354	Baseplate change TP 1	0		143246	3	2020-01-26 21:00:16	2020-01-26 21:00:16	2020-07-17 12:52:32	DE002	4	4	1	1	09861E45-5E20-4EE3-A626-E90BD05AE792.JPEG	2020-01-26 21:31:00	2020-01-26 21:31:00	2020-01-26 21:31:00	2020	1	26	1	1	2CE5DAC0-6DAB-457E-B3ED-87D8133C2929.JPEG	2020-01-26 21:32:00	2020-01-26 21:32:00	2020-01-26 21:32:00	2020	1	26
16	CP288	86	Prod	1103	81	2041	23	Klinikum der Universitat Munchen- Grosshadern	DE002	World	9423	Product change TP1	0	5849	APP_PRODUCTCHANGE_TP_1	Product change TP1	17		48354	Baseplate change TP 1	0		144187	4	2020-01-28 09:00:16	2020-01-28 09:00:16	2020-07-17 12:52:32	DE002	5	5	1	1	FC0B7CBC-CFCD-43E6-AF86-78822BB7E22F.JPEG	2020-01-28 09:41:00	2020-01-28 09:41:00	2020-01-28 09:41:00	2020	1	28	1	1	840C38A0-4C7B-4A11-90AB-33B06DF10B44.JPEG	2020-01-28 09:42:00	2020-01-28 09:42:00	2020-01-28 09:42:00	2020	1	28
16	CP288	86	Prod	1103	81	2041	23	Klinikum der Universitat Munchen- Grosshadern	DE002	World	9423	Product change TP1	0	5849	APP_PRODUCTCHANGE_TP_1	Product change TP1	17		48354	Baseplate change TP 1	0		144200	5	2020-01-29 10:00:06	2020-01-29 10:00:06	2020-07-17 12:52:32	DE002	6	6	1	1	B979865F-70B5-4238-A534-B92F33CB0CF9.JPEG	2020-01-29 10:36:00	2020-01-29 10:36:00	2020-01-29 10:36:00	2020	1	29	1	1	7174FBA0-1EE8-4852-90B2-3A1E9F64657D.JPEG	2020-01-29 10:37:00	2020-01-29 10:37:00	2020-01-29 10:37:00	2020	1	29
16	CP288	86	Prod	1103	81	2041	23	Klinikum der Universitat Munchen- Grosshadern	DE002	World	9423	Product change TP1	0	5849	APP_PRODUCTCHANGE_TP_1	Product change TP1	17		48354	Baseplate change TP 1	0		144384	6	2020-01-31 09:00:08	2020-01-31 09:00:08	2020-07-17 12:52:32	DE002	7	7	1	1	AD1291C7-AE80-43AA-BE61-5C2BD0547643.JPEG	2020-01-31 09:08:00	2020-01-31 09:08:00	2020-01-31 09:08:00	2020	1	31	1	1	02888084-2A9F-4A26-B3E0-2004D6B90613.JPEG	2020-01-31 09:09:00	2020-01-31 09:09:00	2020-01-31 09:09:00	2020	1	31
16	CP288	86	Prod	1103	81	2041	23	Klinikum der Universitat Munchen- Grosshadern	DE002	World	9423	Product change TP1	0	5849	APP_PRODUCTCHANGE_TP_1	Product change TP1	17		48354	Baseplate change TP 1	0		144405	7	2020-02-01 08:00:07	2020-02-01 08:00:07	2020-07-17 12:52:32	DE002	8	8	1	1	6B11FE96-DA2C-49C5-97FA-4B65E83DD1AA.JPEG	2020-02-01 07:54:00	2020-02-01 07:54:00	2020-02-01 07:54:00	2020	2	1	1	1	01DFCCEF-D76E-49C1-826F-6BF076EDFC95.JPEG	2020-02-01 07:55:00	2020-02-01 07:55:00	2020-02-01 07:55:00	2020	2	1
16	CP288	86	Prod	1103	81	2041	23	Klinikum der Universitat Munchen- Grosshadern	DE002	World	9423	Product change TP1	0	5849	APP_PRODUCTCHANGE_TP_1	Product change TP1	17		48354	Baseplate change TP 1	0		144676	8	2020-02-04 08:00:04	2020-02-04 08:00:04	2020-07-17 12:52:32	DE002	10	10	1	1	6FD1CDD5-2240-4443-B3CF-EA044C7C9657.JPEG	2020-02-02 21:48:00	2020-02-02 21:48:00	2020-02-02 21:48:00	2020	2	2	1	1	BE850FE3-F830-466E-BC3D-E0E449B08CD3.JPEG	2020-02-02 21:48:00	2020-02-02 21:48:00	2020-02-02 21:48:00	2020	2	2
16	CP288	86	Prod	1103	81	2041	23	Klinikum der Universitat Munchen- Grosshadern	DE002	World	9423	Product change TP1	0	5849	APP_PRODUCTCHANGE_TP_1	Product change TP1	17		48354	Baseplate change TP 1	0		144679	9	2020-02-04 08:00:07	2020-02-04 08:00:07	2020-07-17 12:52:32	DE002	11	11	1	1	240FAE24-C3DE-4C37-823A-5982A7446691.JPEG	2020-02-04 08:41:00	2020-02-04 08:41:00	2020-02-04 08:41:00	2020	2	4	1	1	545824E2-C692-4F9A-9776-9D74DCAB7B78.JPEG	2020-02-04 08:43:00	2020-02-04 08:43:00	2020-02-04 08:43:00	2020	2	4
16	CP288	86	Prod	1103	81	2041	23	Klinikum der Universitat Munchen- Grosshadern	DE002	World	9423	Product change TP1	0	5849	APP_PRODUCTCHANGE_TP_1	Product change TP1	17		48354	Baseplate change TP 1	0		144682	10	2020-02-04 08:00:10	2020-02-04 08:00:10	2020-07-17 12:52:32	DE002	9	9	1	1	B2636AD6-BCE6-40E8-93DD-9EC5650C92DE.JPEG	2020-02-01 15:31:00	2020-02-01 15:31:00	2020-02-01 15:31:00	2020	2	1	1	1	82D827DC-3651-4AEB-9AB5-A8C3806F198F.JPEG	2020-02-01 15:31:00	2020-02-01 15:31:00	2020-02-01 15:31:00	2020	2	1
16	CP288	86	Prod	1103	81	2041	23	Klinikum der Universitat Munchen- Grosshadern	DE002	World	9423	Product change TP1	0	5849	APP_PRODUCTCHANGE_TP_1	Product change TP1	17		48354	Baseplate change TP 1	0		145974	11	2020-02-07 10:00:08	2020-02-07 10:00:08	2020-07-17 12:52:32	DE002	12	12	1	1	83BC13B4-882D-4F0A-BDB7-C2A38EFB97EC.JPEG	2020-02-06 08:07:00	2020-02-06 08:07:00	2020-02-06 08:07:00	2020	2	6	1	1	411531DA-0839-4250-9563-88672200B974.JPEG	2020-02-06 08:08:00	2020-02-06 08:08:00	2020-02-06 08:08:00	2020	2	6
16	CP288	86	Prod	1103	81	2041	23	Klinikum der Universitat Munchen- Grosshadern	DE002	World	9423	Product change TP1	0	5849	APP_PRODUCTCHANGE_TP_1	Product change TP1	17		48354	Baseplate change TP 1	0		145977	12	2020-02-07 10:00:11	2020-02-07 10:00:11	2020-07-17 12:52:32	DE002	13	13	1	1	786F5C35-8280-43E8-949C-080CBF28E54E.JPEG	2020-02-07 10:10:00	2020-02-07 10:10:00	2020-02-07 10:10:00	2020	2	7	1	1	1C5183E4-FD8A-419E-858B-2C46E703DCBE.JPEG	2020-02-07 10:10:00	2020-02-07 10:10:00	2020-02-07 10:10:00	2020	2	7
16	CP288	86	Prod	1103	81	2041	23	Klinikum der Universitat Munchen- Grosshadern	DE002	World	9423	Product change TP1	0	5849	APP_PRODUCTCHANGE_TP_1	Product change TP1	17		48354	Baseplate change TP 1	0		146015	13	2020-02-08 10:00:07	2020-02-08 10:00:07	2020-07-17 12:52:32	DE002	14	14	1	1	B72DC5DE-3416-41ED-A0FD-A41D4C06928E.JPEG	2020-02-08 10:33:00	2020-02-08 10:33:00	2020-02-08 10:33:00	2020	2	8	1	1	6C5952C7-CA5C-40E9-A4B6-A918D4AA7AEF.JPEG	2020-02-08 10:35:00	2020-02-08 10:35:00	2020-02-08 10:35:00	2020	2	8
16	CP288	86	Prod	1103	81	2041	23	Klinikum der Universitat Munchen- Grosshadern	DE002	World	9423	Product change TP1	0	5849	APP_PRODUCTCHANGE_TP_1	Product change TP1	17		48354	Baseplate change TP 1	0		146623	14	2020-02-17 15:00:08	2020-02-17 15:00:08	2020-07-17 12:52:32	DE002	15	15	1	1	98C9AB5A-1B77-4EF9-B5DB-529057F2A454.JPEG	2020-02-09 08:01:00	2020-02-09 08:01:00	2020-02-09 08:01:00	2020	2	9	1	1	4C1E146B-26A0-4A4D-A3FD-D64121C6BE14.JPEG	2020-02-09 08:02:00	2020-02-09 08:02:00	2020-02-09 08:02:00	2020	2	9
16	CP288	86	Prod	1103	81	2041	23	Klinikum der Universitat Munchen- Grosshadern	DE002	World	9423	Product change TP1	0	5849	APP_PRODUCTCHANGE_TP_1	Product change TP1	17		48354	Baseplate change TP 1	0		152756	15	2020-02-22 11:00:15	2020-02-22 11:00:15	2020-07-17 12:52:32	DE002	16	16	1	1	D957E9AA-0C84-4D3C-9EF0-F6A34C87DA55.JPEG	2020-02-10 22:08:00	2020-02-10 22:08:00	2020-02-10 22:08:00	2020	2	10	1	1	139745E8-8134-45DE-B063-19DBC995561B.JPEG	2020-02-10 22:09:00	2020-02-10 22:09:00	2020-02-10 22:09:00	2020	2	10
16	CP288	86	Prod	1103	81	2041	23	Klinikum der Universitat Munchen- Grosshadern	DE002	World	9423	Product change TP1	0	5849	APP_PRODUCTCHANGE_TP_1	Product change TP1	17		48354	Baseplate change TP 1	0		152759	16	2020-02-22 11:00:20	2020-02-22 11:00:20	2020-07-17 12:52:32	DE002	17	17	1	1	04F259BE-825F-4AAC-A684-56867948E968.JPEG	2020-02-12 22:02:00	2020-02-12 22:02:00	2020-02-12 22:02:00	2020	2	12	1	1	CE2F6D9E-AC4A-473F-99F4-5CF7B8826135.JPEG	2020-02-12 22:04:00	2020-02-12 22:04:00	2020-02-12 22:04:00	2020	2	12
16	CP288	86	Prod	1103	81	2041	23	Klinikum der Universitat Munchen- Grosshadern	DE002	World	9423	Product change TP1	0	5849	APP_PRODUCTCHANGE_TP_1	Product change TP1	17		48354	Baseplate change TP 1	0		152762	17	2020-02-22 11:00:25	2020-02-22 11:00:25	2020-07-17 12:52:32	DE002	18	18	1	1	4ABA2B6C-25BB-4BD5-B1DC-049714EA0889.JPEG	2020-02-15 22:36:00	2020-02-15 22:36:00	2020-02-15 22:36:00	2020	2	15	1	1	C7575919-2E62-4DA8-A506-3A1D7594BC0B.JPEG	2020-02-15 22:37:00	2020-02-15 22:37:00	2020-02-15 22:37:00	2020	2	15
16	CP288	86	Prod	1103	81	2041	23	Klinikum der Universitat Munchen- Grosshadern	DE002	World	9423	Product change TP1	0	5849	APP_PRODUCTCHANGE_TP_1	Product change TP1	17		48354	Baseplate change TP 1	0		152765	18	2020-02-22 11:00:29	2020-02-22 11:00:29	2020-07-17 12:52:32	DE002	19	19	1	1	ABF8C188-8749-4D60-8636-B464DA37FC90.JPEG	2020-02-17 15:08:00	2020-02-17 15:08:00	2020-02-17 15:08:00	2020	2	17	1	1	D494A62C-B818-4952-BD69-C6603C8BF262.JPEG	2020-02-17 15:08:00	2020-02-17 15:08:00	2020-02-17 15:08:00	2020	2	17
16	CP288	86	Prod	1103	81	2041	23	Klinikum der Universitat Munchen- Grosshadern	DE002	World	9423	Product change TP1	0	5849	APP_PRODUCTCHANGE_TP_1	Product change TP1	17		48354	Baseplate change TP 1	0		152768	19	2020-02-22 11:00:34	2020-02-22 11:00:34	2020-07-17 12:52:32	DE002	20	20	1	1	354D3D27-D4F6-4E3C-B3CC-139CEE5C7BB5.JPEG	2020-02-19 22:30:00	2020-02-19 22:30:00	2020-02-19 22:30:00	2020	2	19	1	1	6D390B1D-9BEB-497E-A659-9E4BBA89AAD5.JPEG	2020-02-19 22:32:00	2020-02-19 22:32:00	2020-02-19 22:32:00	2020	2	19
16	CP288	86	Prod	1103	81	2041	23	Klinikum der Universitat Munchen- Grosshadern	DE002	World	9423	Product change TP1	0	5849	APP_PRODUCTCHANGE_TP_1	Product change TP1	17		48354	Baseplate change TP 1	0		152771	20	2020-02-22 12:00:04	2020-02-22 12:00:04	2020-07-17 12:52:32	DE002	21	21	1	1	917C291B-5C0D-42AC-9664-92FF644AF072.JPEG	2020-02-22 11:55:00	2020-02-22 11:55:00	2020-02-22 11:55:00	2020	2	22	1	1	099D6DA4-FA95-4172-B4D1-C24E56A0F74B.JPEG	2020-02-22 11:57:00	2020-02-22 11:57:00	2020-02-22 11:57:00	2020	2	22
16	CP288	86	Prod	1103	81	2041	23	Klinikum der Universitat Munchen- Grosshadern	DE002	World	9423	Product change TP1	0	5849	APP_PRODUCTCHANGE_TP_1	Product change TP1	17		48354	Baseplate change TP 1	0		190711	21	2020-06-29 15:00:09	2020-06-29 15:00:09	2020-07-17 12:52:32	DE002	22	22	1	1	2C965A3A-CBC0-45D0-8758-635D86202E1E.JPEG	2020-02-23 21:28:00	2020-02-23 21:28:00	2020-02-23 21:28:00	2020	2	23	1	1	E1B01EF0-A7B0-4E59-A5C3-612669179391.JPEG	2020-02-23 21:29:00	2020-02-23 21:29:00	2020-02-23 21:29:00	2020	2	23
16	CP288	86	Prod	1103	81	2041	23	Klinikum der Universitat Munchen- Grosshadern	DE002	World	9423	Product change TP1	0	5849	APP_PRODUCTCHANGE_TP_1	Product change TP1	17		48354	Baseplate change TP 1	0		190714	22	2020-06-29 15:00:12	2020-06-29 15:00:12	2020-07-17 12:52:32	DE002	23	23	1	1	6660F33F-DDD0-4B0E-9751-B62E5AFAE28D.JPEG	2020-02-25 07:32:00	2020-02-25 07:32:00	2020-02-25 07:32:00	2020	2	25	1	1	9DF7525E-1ED0-48B6-A2FF-51BE92C49C5D.JPEG	2020-02-25 07:33:00	2020-02-25 07:33:00	2020-02-25 07:33:00	2020	2	25
16	CP288	86	Prod	1103	81	2041	23	Klinikum der Universitat Munchen- Grosshadern	DE002	World	9423	Product change TP1	0	5849	APP_PRODUCTCHANGE_TP_1	Product change TP1	17		48354	Baseplate change TP 1	0		190717	23	2020-06-29 15:00:15	2020-06-29 15:00:15	2020-07-17 12:52:32	DE002	24	24	1	1	AB1B6B45-3C0B-4CC5-A19A-085F80FE7737.JPEG	2020-02-27 07:55:00	2020-02-27 07:55:00	2020-02-27 07:55:00	2020	2	27	1	1	E8469309-63B2-4277-8945-C48267A174F6.JPEG	2020-02-27 07:56:00	2020-02-27 07:56:00	2020-02-27 07:56:00	2020	2	27
16	CP288	86	Prod	1103	81	2041	23	Klinikum der Universitat Munchen- Grosshadern	DE002	World	9426	Product change TP2	0	5852	APP_PRODUCTCHANGE_TP_2	Product change TP2	19		48355	Baseplate change TP 1	0		190722	2	2020-06-29 15:00:21	2020-06-29 15:00:21	2020-07-17 12:52:32	DE002	40	40	1	1	EC6DE5B5-AE5C-4EA6-ACFD-1294A3A47455.JPEG	2020-03-25 07:39:00	2020-03-25 07:39:00	2020-03-25 07:39:00	2020	3	25	1	1	872ABB0C-31F9-4464-8C8D-31DE61240961.JPEG	2020-03-25 07:42:00	2020-03-25 07:42:00	2020-03-25 07:42:00	2020	3	25
16	CP288	86	Prod	1103	81	2041	23	Klinikum der Universitat Munchen- Grosshadern	DE002	World	9426	Product change TP2	0	5852	APP_PRODUCTCHANGE_TP_2	Product change TP2	19		48355	Baseplate change TP 1	0		190725	3	2020-06-29 15:00:51	2020-06-29 15:00:51	2020-07-17 12:52:32	DE002	41	41	1	1	B5BA171C-A5AA-4234-86C0-17A282B798DE.JPEG	2020-03-26 07:46:00	2020-03-26 07:46:00	2020-03-26 07:46:00	2020	3	26	1	1	BFC28A2E-6A9F-45E7-8E87-D15D5159830B.JPEG	2020-03-26 07:49:00	2020-03-26 07:49:00	2020-03-26 07:49:00	2020	3	26
16	CP288	86	Prod	1103	81	2041	23	Klinikum der Universitat Munchen- Grosshadern	DE002	World	9426	Product change TP2	0	5852	APP_PRODUCTCHANGE_TP_2	Product change TP2	19		48355	Baseplate change TP 1	0		190728	4	2020-06-29 15:00:53	2020-06-29 15:00:53	2020-07-17 12:52:32	DE002	42	42	1	1	8734B41C-A92D-435F-A2C1-7F260D0B8E98.JPEG	2020-03-27 07:45:00	2020-03-27 07:45:00	2020-03-27 07:45:00	2020	3	27	1	1	1221770D-D3E1-4D32-9689-46BD65A9FCC6.JPEG	2020-03-27 07:46:00	2020-03-27 07:46:00	2020-03-27 07:46:00	2020	3	27
16	CP288	86	Prod	1103	81	2041	23	Klinikum der Universitat Munchen- Grosshadern	DE002	World	9426	Product change TP2	0	5852	APP_PRODUCTCHANGE_TP_2	Product change TP2	19		48355	Baseplate change TP 1	0		190731	5	2020-06-29 15:00:56	2020-06-29 15:00:56	2020-07-17 12:52:32	DE002	43	43	1	1	4C9D7742-BDF7-42B2-AB42-B376423681CC.JPEG	2020-03-29 08:23:00	2020-03-29 08:23:00	2020-03-29 08:23:00	2020	3	29	1	1	29E6569C-279C-43A2-8D8A-A98F6AB2A3B0.JPEG	2020-03-29 08:24:00	2020-03-29 08:24:00	2020-03-29 08:24:00	2020	3	29
16	CP288	86	Prod	1103	81	2041	23	Klinikum der Universitat Munchen- Grosshadern	DE002	World	9426	Product change TP2	0	5852	APP_PRODUCTCHANGE_TP_2	Product change TP2	19		48355	Baseplate change TP 1	0		190734	6	2020-06-29 15:00:58	2020-06-29 15:00:58	2020-07-17 12:52:32	DE002	46	46	1	1	38B55D74-9D50-4DEE-89C9-512208A109E1.JPEG	2020-04-01 22:47:00	2020-04-01 22:47:00	2020-04-01 22:47:00	2020	4	1	1	1	8208EE56-06E6-4625-B1EC-87951059AD66.JPEG	2020-04-01 22:50:00	2020-04-01 22:50:00	2020-04-01 22:50:00	2020	4	1
16	CP288	86	Prod	1103	81	2041	23	Klinikum der Universitat Munchen- Grosshadern	DE002	World	9426	Product change TP2	0	5852	APP_PRODUCTCHANGE_TP_2	Product change TP2	19		48355	Baseplate change TP 1	0		190737	7	2020-06-29 15:01:01	2020-06-29 15:01:01	2020-07-17 12:52:32	DE002	47	47	1	1	10CBD026-DAA6-4526-B3A3-A1421ADB1EDC.JPEG	2020-04-02 08:00:00	2020-04-02 08:00:00	2020-04-02 08:00:00	2020	4	2	1	1	17140D63-22F1-4FA1-937E-C4EC63B00F4F.JPEG	2020-04-02 08:00:00	2020-04-02 08:00:00	2020-04-02 08:00:00	2020	4	2
16	CP288	86	Prod	1103	81	2041	23	Klinikum der Universitat Munchen- Grosshadern	DE002	World	9426	Product change TP2	0	5852	APP_PRODUCTCHANGE_TP_2	Product change TP2	19		48355	Baseplate change TP 1	0		190740	8	2020-06-29 15:01:08	2020-06-29 15:01:08	2020-07-17 12:52:32	DE002	48	48	1	1	B7D420BD-4F34-4BBF-982E-0602D5CDAB4B.JPEG	2020-04-03 11:57:00	2020-04-03 11:57:00	2020-04-03 11:57:00	2020	4	3	1	1	91C917A1-60CC-49EE-81F3-B368EE1EFC7C.JPEG	2020-04-03 11:58:00	2020-04-03 11:58:00	2020-04-03 11:58:00	2020	4	3
16	CP288	86	Prod	1103	81	2041	23	Klinikum der Universitat Munchen- Grosshadern	DE002	World	9426	Product change TP2	0	5852	APP_PRODUCTCHANGE_TP_2	Product change TP2	19		48355	Baseplate change TP 1	0		190743	9	2020-06-29 15:01:10	2020-06-29 15:01:10	2020-07-17 12:52:32	DE002	49	49	1	1	6A2B7980-714D-4BE5-8A73-75D1E4668FF6.JPEG	2020-04-04 21:53:00	2020-04-04 21:53:00	2020-04-04 21:53:00	2020	4	4	1	1	75272825-1ED9-47DA-B6A5-4CDC5E7DDB0B.JPEG	2020-04-04 21:54:00	2020-04-04 21:54:00	2020-04-04 21:54:00	2020	4	4
16	CP288	86	Prod	1103	81	2041	23	Klinikum der Universitat Munchen- Grosshadern	DE002	World	9426	Product change TP2	0	5852	APP_PRODUCTCHANGE_TP_2	Product change TP2	19		48355	Baseplate change TP 1	0		190746	10	2020-06-29 15:01:33	2020-06-29 15:01:33	2020-07-17 12:52:32	DE002	50	50	1	1	2EACCC77-AF77-4699-9A86-FA373B6DE58B.JPEG	2020-04-05 22:40:00	2020-04-05 22:40:00	2020-04-05 22:40:00	2020	4	5	1	1	D86E44BA-19D6-44C4-945F-583C1832267C.JPEG	2020-04-05 22:41:00	2020-04-05 22:41:00	2020-04-05 22:41:00	2020	4	5
16	CP288	86	Prod	1103	81	2041	23	Klinikum der Universitat Munchen- Grosshadern	DE002	World	9426	Product change TP2	0	5852	APP_PRODUCTCHANGE_TP_2	Product change TP2	19		48355	Baseplate change TP 1	0		190749	11	2020-06-29 15:01:39	2020-06-29 15:01:39	2020-07-17 12:52:32	DE002	51	51	1	1	188C3D2A-75E4-43DD-B17C-A59D1A24859F.JPEG	2020-04-06 16:11:00	2020-04-06 16:11:00	2020-04-06 16:11:00	2020	4	6	1	1	813F1E71-8D99-4099-B912-909B88F1804E.JPEG	2020-04-06 16:12:00	2020-04-06 16:12:00	2020-04-06 16:12:00	2020	4	6
16	CP288	86	Prod	1103	81	2041	23	Klinikum der Universitat Munchen- Grosshadern	DE002	World	9426	Product change TP2	0	5852	APP_PRODUCTCHANGE_TP_2	Product change TP2	19		48355	Baseplate change TP 1	0		190752	12	2020-06-29 21:00:06	2020-06-29 21:00:06	2020-07-17 12:52:32	DE002	53	53	1	1	47F73A01-FCE3-4DA3-83A4-4D9FF3734FAC.JPEG	2020-04-08 07:35:00	2020-04-08 07:35:00	2020-04-08 07:35:00	2020	4	8	1	1	61A59976-14AC-4DD6-94A3-FB4B67A56DD4.JPEG	2020-04-08 07:35:00	2020-04-08 07:35:00	2020-04-08 07:35:00	2020	4	8
16	CP288	86	Prod	1103	81	2041	23	Klinikum der Universitat Munchen- Grosshadern	DE002	World	9426	Product change TP2	0	5852	APP_PRODUCTCHANGE_TP_2	Product change TP2	19		48355	Baseplate change TP 1	0		190755	13	2020-06-29 21:00:09	2020-06-29 21:00:09	2020-07-17 12:52:32	DE002	54	54	1	1	797C11CF-E08C-4A23-8510-CF1B4D094566.JPEG	2020-04-09 06:08:00	2020-04-09 06:08:00	2020-04-09 06:08:00	2020	4	9	1	1	4D5FC078-8A9E-4655-AD80-807F3B731366.JPEG	2020-04-09 06:09:00	2020-04-09 06:09:00	2020-04-09 06:09:00	2020	4	9
16	CP288	86	Prod	1103	81	2041	23	Klinikum der Universitat Munchen- Grosshadern	DE002	World	9426	Product change TP2	0	5852	APP_PRODUCTCHANGE_TP_2	Product change TP2	19		48355	Baseplate change TP 1	0		190758	14	2020-06-29 21:00:12	2020-06-29 21:00:12	2020-07-17 12:52:32	DE002	55	55	1	1	9E850FBF-8D24-42D9-9B0B-2B77907F76D1.JPEG	2020-04-09 10:01:00	2020-04-09 10:01:00	2020-04-09 10:01:00	2020	4	9	1	1	5E3A39AE-DF13-4E4A-AD46-8A8D08FC8B39.JPEG	2020-04-09 10:01:00	2020-04-09 10:01:00	2020-04-09 10:01:00	2020	4	9
16	CP288	86	Prod	1103	81	2041	23	Klinikum der Universitat Munchen- Grosshadern	DE002	World	9426	Product change TP2	0	5852	APP_PRODUCTCHANGE_TP_2	Product change TP2	19		48355	Baseplate change TP 1	0		190761	15	2020-06-29 21:00:28	2020-06-29 21:00:28	2020-07-17 12:52:32	DE002	60	60	1	1	F905F58B-64CC-44F9-B22F-F6BC6582DA2F.JPEG	2020-04-17 07:39:00	2020-04-17 07:39:00	2020-04-17 07:39:00	2020	4	17	1	1	90A8921B-60DC-4B55-ADAF-CF69D4383609.JPEG	2020-04-17 07:40:00	2020-04-17 07:40:00	2020-04-17 07:40:00	2020	4	17
16	CP288	86	Prod	1103	81	2041	23	Klinikum der Universitat Munchen- Grosshadern	DE002	World	9426	Product change TP2	0	5852	APP_PRODUCTCHANGE_TP_2	Product change TP2	19		48355	Baseplate change TP 1	0		190764	16	2020-06-30 04:00:11	2020-06-30 04:00:11	2020-07-17 12:52:32	DE002	61	61	1	1	AE21FA5D-C707-4FC4-9F23-88DDD324B992.JPEG	2020-04-19 07:44:00	2020-04-19 07:44:00	2020-04-19 07:44:00	2020	4	19	1	1	05A4B536-F0BE-4C3E-A798-BDF36BC2E2C7.JPEG	2020-04-19 07:45:00	2020-04-19 07:45:00	2020-04-19 07:45:00	2020	4	19
16	CP288	86	Prod	1103	81	2041	23	Klinikum der Universitat Munchen- Grosshadern	DE002	World	9426	Product change TP2	0	5852	APP_PRODUCTCHANGE_TP_2	Product change TP2	19		48355	Baseplate change TP 1	0		190855	17	2020-06-30 06:00:08	2020-06-30 06:00:08	2020-07-17 12:52:32	DE002	62	62	1	1	28E2E6B5-3770-4A16-BA03-0D26E1618420.JPEG	2020-04-20 07:43:00	2020-04-20 07:43:00	2020-04-20 07:43:00	2020	4	20	1	1	9EF44674-4849-427A-8555-6D9CF3DA862E.JPEG	2020-04-20 07:43:00	2020-04-20 07:43:00	2020-04-20 07:43:00	2020	4	20
16	CP288	86	Prod	1104	81	2042	23	Klinikum der Universitat Munchen- Grosshadern	DE002	World	9454	Product change TP1	0	5849	APP_PRODUCTCHANGE_TP_1	Product change TP1	17		48414	Baseplate change TP 1	0		131908	1	2020-01-28 06:00:05	2020-01-28 06:00:05	2020-07-17 12:52:32	DE002	0	0	1	1	44C85AF6-3946-40C5-8E5D-468F1BCAC634.JPEG	2020-01-28 05:59:00	2020-01-28 05:59:00	2020-01-28 05:59:00	2020	1	28	1	1	CCAC7072-B01A-4318-AF22-73149563F04E.JPEG	2020-01-28 06:04:00	2020-01-28 06:04:00	2020-01-28 06:04:00	2020	1	28
16	CP288	86	Prod	1104	81	2042	23	Klinikum der Universitat Munchen- Grosshadern	DE002	World	9457	Product change TP2	0	5852	APP_PRODUCTCHANGE_TP_2	Product change TP2	19		48415	Baseplate change TP 1	0		131910	1	2020-03-05 10:00:08	2020-03-05 10:00:08	2020-07-17 12:52:32	DE002	11	11	1	1	707E7251-84D6-4E75-84B1-84CA58CB3C4D.JPEG	2020-03-05 10:12:00	2020-03-05 10:12:00	2020-03-05 10:12:00	2020	3	5	1	1	918F855F-0EAE-4085-8AF2-14D194B2A352.JPEG	2020-03-05 10:14:00	2020-03-05 10:14:00	2020-03-05 10:14:00	2020	3	5
16	CP288	86	Prod	1104	81	2042	23	Klinikum der Universitat Munchen- Grosshadern	DE002	World	9454	Product change TP1	0	5849	APP_PRODUCTCHANGE_TP_1	Product change TP1	17		48414	Baseplate change TP 1	0		144197	2	2020-01-28 23:00:06	2020-01-28 23:00:06	2020-07-17 12:52:32	DE002	1	1	1	1	D862FFFF-0BA4-42D7-9322-6FC58DCB6ED1.JPEG	2020-01-28 23:00:00	2020-01-28 23:00:00	2020-01-28 23:00:00	2020	1	28	1	1	519413A9-C915-455E-9778-A1C9C8921E44.JPEG	2020-01-28 23:05:00	2020-01-28 23:05:00	2020-01-28 23:05:00	2020	1	28
16	CP288	86	Prod	1104	81	2042	23	Klinikum der Universitat Munchen- Grosshadern	DE002	World	9454	Product change TP1	0	5849	APP_PRODUCTCHANGE_TP_1	Product change TP1	17		48414	Baseplate change TP 1	0		144408	3	2020-02-01 19:00:07	2020-02-01 19:00:07	2020-07-17 12:52:32	DE002	2	2	1	1	1C909C4A-46DD-4F32-B473-7B4A47D84500.JPEG	2020-02-01 18:58:00	2020-02-01 18:58:00	2020-02-01 18:58:00	2020	2	1	1	1	2508A49C-9BAD-4B36-8DEC-921A0BEA5C02.JPEG	2020-02-01 18:59:00	2020-02-01 18:59:00	2020-02-01 18:59:00	2020	2	1
16	CP288	86	Prod	1104	81	2042	23	Klinikum der Universitat Munchen- Grosshadern	DE002	World	9454	Product change TP1	0	5849	APP_PRODUCTCHANGE_TP_1	Product change TP1	17		48414	Baseplate change TP 1	0		144419	4	2020-02-03 09:00:07	2020-02-03 09:00:07	2020-07-17 12:52:32	DE002	3	3	1	1	BB9C4081-C096-4598-BE98-5FB25403CF2E.JPEG	2020-02-03 09:19:00	2020-02-03 09:19:00	2020-02-03 09:19:00	2020	2	3	1	1	225CBE5C-9D91-4880-9C76-BD1D28061350.JPEG	2020-02-03 09:19:00	2020-02-03 09:19:00	2020-02-03 09:19:00	2020	2	3
16	CP288	86	Prod	1104	81	2042	23	Klinikum der Universitat Munchen- Grosshadern	DE002	World	9454	Product change TP1	0	5849	APP_PRODUCTCHANGE_TP_1	Product change TP1	17		48414	Baseplate change TP 1	0		144781	5	2020-02-04 21:00:04	2020-02-04 21:00:04	2020-07-17 12:52:32	DE002	4	4	1	1	094D144C-E569-4A42-B61F-4D48FF9BE83A.JPEG	2020-02-04 09:05:00	2020-02-04 09:05:00	2020-02-04 09:05:00	2020	2	4	1	1	70C8A019-C30C-4651-BC94-604A04E15542.JPEG	2020-02-04 09:06:00	2020-02-04 09:06:00	2020-02-04 09:06:00	2020	2	4
16	CP288	86	Prod	1104	81	2042	23	Klinikum der Universitat Munchen- Grosshadern	DE002	World	9454	Product change TP1	0	5849	APP_PRODUCTCHANGE_TP_1	Product change TP1	17		48414	Baseplate change TP 1	0		144784	6	2020-02-04 21:00:09	2020-02-04 21:00:09	2020-07-17 12:52:32	DE002	5	5	1	1	C54B04BF-A8C3-4DF6-B7B6-06D43A65A4F5.JPEG	2020-02-04 21:43:00	2020-02-04 21:43:00	2020-02-04 21:43:00	2020	2	4	1	1	C86C3C36-0C29-451E-9ABF-F8B5EB9DB550.JPEG	2020-02-04 21:45:00	2020-02-04 21:45:00	2020-02-04 21:45:00	2020	2	4
16	CP288	86	Prod	1104	81	2042	23	Klinikum der Universitat Munchen- Grosshadern	DE002	World	9454	Product change TP1	0	5849	APP_PRODUCTCHANGE_TP_1	Product change TP1	17		48414	Baseplate change TP 1	0		145960	7	2020-02-07 05:00:13	2020-02-07 05:00:13	2020-07-17 12:52:32	DE002	6	6	1	1	6B8F5885-6DBA-4ABD-89E9-95BB8BC9D10B.JPEG	2020-02-07 05:49:00	2020-02-07 05:49:00	2020-02-07 05:49:00	2020	2	7	1	1	C1C482FA-C8B6-4582-BE4A-F6A0C346D749.JPEG	2020-02-07 05:52:00	2020-02-07 05:52:00	2020-02-07 05:52:00	2020	2	7
16	CP288	86	Prod	1104	81	2042	23	Klinikum der Universitat Munchen- Grosshadern	DE002	World	9454	Product change TP1	0	5849	APP_PRODUCTCHANGE_TP_1	Product change TP1	17		48414	Baseplate change TP 1	0		146024	8	2020-02-08 21:00:38	2020-02-08 21:00:38	2020-07-17 12:52:32	DE002	7	7	1	1	3992FD47-DA37-47A9-B2E5-2DBFF50CDE1F.JPEG	2020-02-08 21:30:00	2020-02-08 21:30:00	2020-02-08 21:30:00	2020	2	8	1	1	E6895723-062C-4A51-BF94-18C0935DCF4E.JPEG	2020-02-08 21:34:00	2020-02-08 21:34:00	2020-02-08 21:34:00	2020	2	8
16	CP288	86	Prod	1104	81	2042	23	Klinikum der Universitat Munchen- Grosshadern	DE002	World	9454	Product change TP1	0	5849	APP_PRODUCTCHANGE_TP_1	Product change TP1	17		48414	Baseplate change TP 1	0		146059	9	2020-02-10 09:00:12	2020-02-10 09:00:12	2020-07-17 12:52:32	DE002	8	8	1	1	2CE08469-982C-415B-856C-2A662A569500.JPEG	2020-02-10 08:55:00	2020-02-10 08:55:00	2020-02-10 08:55:00	2020	2	10	1	1	BCC177E1-3843-4949-8DF6-0B81DE224B54.JPEG	2020-02-10 08:55:00	2020-02-10 08:55:00	2020-02-10 08:55:00	2020	2	10
16	CP288	86	Prod	1104	81	2042	23	Klinikum der Universitat Munchen- Grosshadern	DE002	World	9454	Product change TP1	0	5849	APP_PRODUCTCHANGE_TP_1	Product change TP1	17		48414	Baseplate change TP 1	0		146167	10	2020-02-11 22:00:10	2020-02-11 22:00:10	2020-07-17 12:52:32	DE002	9	9	1	1	1D3D009A-2C40-4A79-8555-40E538B08E82.JPEG	2020-02-11 22:32:00	2020-02-11 22:32:00	2020-02-11 22:32:00	2020	2	11	1	1	F0C49DA2-75D9-4BCC-8B3C-C541EDD252BA.JPEG	2020-02-11 22:36:00	2020-02-11 22:36:00	2020-02-11 22:36:00	2020	2	11
16	CP288	86	Prod	1104	81	2042	23	Klinikum der Universitat Munchen- Grosshadern	DE002	World	9454	Product change TP1	0	5849	APP_PRODUCTCHANGE_TP_1	Product change TP1	17		48414	Baseplate change TP 1	0		146521	11	2020-02-15 21:00:08	2020-02-15 21:00:08	2020-07-17 12:52:32	DE002	10	10	1	1	32610F72-25D9-4CEC-A7FE-AF2C9E95C2CB.JPEG	2020-02-15 21:10:00	2020-02-15 21:10:00	2020-02-15 21:10:00	2020	2	15	1	1	6F63BE23-D4B4-4261-8815-CA564D3E2901.JPEG	2020-02-15 21:15:00	2020-02-15 21:15:00	2020-02-15 21:15:00	2020	2	15
16	CP288	86	Prod	1104	81	2042	23	Klinikum der Universitat Munchen- Grosshadern	DE002	World	9454	Product change TP1	0	5849	APP_PRODUCTCHANGE_TP_1	Product change TP1	17		48414	Baseplate change TP 1	0		149441	12	2020-02-18 16:00:05	2020-02-18 16:00:05	2020-07-17 12:52:32	DE002	11	11	1	1	77988A87-2B78-426B-96C4-7B2EE63D646A.JPEG	2020-02-18 16:50:00	2020-02-18 16:50:00	2020-02-18 16:50:00	2020	2	18	1	1	54FCBE14-A2FA-440C-B984-0B1228CEE4C0.JPEG	2020-02-18 16:54:00	2020-02-18 16:54:00	2020-02-18 16:54:00	2020	2	18
16	CP288	86	Prod	1104	81	2042	23	Klinikum der Universitat Munchen- Grosshadern	DE002	World	9454	Product change TP1	0	5849	APP_PRODUCTCHANGE_TP_1	Product change TP1	17		48414	Baseplate change TP 1	0		152564	13	2020-02-20 22:00:08	2020-02-20 22:00:08	2020-07-17 12:52:32	DE002	12	12	1	1	8ACEA066-E563-47ED-8D88-850EEE880582.JPEG	2020-02-20 22:16:00	2020-02-20 22:16:00	2020-02-20 22:16:00	2020	2	20	1	1	1A72AC7D-9E41-49D0-B9C2-0C72E1D31CB5.JPEG	2020-02-20 22:22:00	2020-02-20 22:22:00	2020-02-20 22:22:00	2020	2	20
16	CP288	86	Prod	1104	81	2042	23	Klinikum der Universitat Munchen- Grosshadern	DE002	World	9454	Product change TP1	0	5849	APP_PRODUCTCHANGE_TP_1	Product change TP1	17		48414	Baseplate change TP 1	0		152795	14	2020-02-23 10:00:11	2020-02-23 10:00:11	2020-07-17 12:52:32	DE002	13	13	1	1	EB4CFEA3-D8B3-42B4-BB7A-BCDE7B04BF91.JPEG	2020-02-23 10:20:00	2020-02-23 10:20:00	2020-02-23 10:20:00	2020	2	23	1	1	412D747D-F6AA-42B4-BD83-11CB95CE6AAC.JPEG	2020-02-23 10:21:00	2020-02-23 10:21:00	2020-02-23 10:21:00	2020	2	23
16	CP288	86	Prod	1104	81	2042	23	Klinikum der Universitat Munchen- Grosshadern	DE002	World	9454	Product change TP1	0	5849	APP_PRODUCTCHANGE_TP_1	Product change TP1	17		48414	Baseplate change TP 1	0		154322	15	2020-02-26 08:00:21	2020-02-26 08:00:21	2020-07-17 12:52:32	DE002	15	15	1	1	88C0E955-0E6B-4A8A-944B-525DF749C43B.JPEG	2020-02-26 08:03:00	2020-02-26 08:03:00	2020-02-26 08:03:00	2020	2	26	1	1	723D6234-F9A3-49DC-858D-2EEC0FC8BDCE.JPEG	2020-02-26 08:04:00	2020-02-26 08:04:00	2020-02-26 08:04:00	2020	2	26
16	CP288	86	Prod	1104	81	2042	23	Klinikum der Universitat Munchen- Grosshadern	DE002	World	9454	Product change TP1	0	5849	APP_PRODUCTCHANGE_TP_1	Product change TP1	17		48414	Baseplate change TP 1	0		154650	16	2020-02-27 19:00:47	2020-02-27 19:00:47	2020-07-17 12:52:32	DE002	16	16	1	1	6E3017FC-251C-4EC2-A94A-9F579239DC72.JPEG	2020-02-27 19:49:00	2020-02-27 19:49:00	2020-02-27 19:49:00	2020	2	27	1	1	033E0489-63A9-489D-ACB6-3D2D31B8FB99.JPEG	2020-02-27 19:49:00	2020-02-27 19:49:00	2020-02-27 19:49:00	2020	2	27
16	CP288	86	Prod	1104	81	2042	23	Klinikum der Universitat Munchen- Grosshadern	DE002	World	9454	Product change TP1	0	5849	APP_PRODUCTCHANGE_TP_1	Product change TP1	17		48414	Baseplate change TP 1	0		154787	17	2020-02-29 07:00:13	2020-02-29 07:00:13	2020-07-17 12:52:32	DE002	17	17	1	1	BDE7C531-348E-42EE-9FE4-9BB322679F19.JPEG	2020-02-29 07:50:00	2020-02-29 07:50:00	2020-02-29 07:50:00	2020	2	29	1	1	D941B1E8-0491-400F-83F0-D26141DCD6AD.JPEG	2020-02-29 07:52:00	2020-02-29 07:52:00	2020-02-29 07:52:00	2020	2	29
16	CP288	86	Prod	1104	81	2042	23	Klinikum der Universitat Munchen- Grosshadern	DE002	World	9454	Product change TP1	0	5849	APP_PRODUCTCHANGE_TP_1	Product change TP1	17		48414	Baseplate change TP 1	0		155017	18	2020-03-02 22:00:05	2020-03-02 22:00:05	2020-07-17 12:52:32	DE002	18	18	1	1	AF6E64B3-5463-4E9D-B9F3-E72ED9B603B9.JPEG	2020-03-02 22:02:00	2020-03-02 22:02:00	2020-03-02 22:02:00	2020	3	2	1	1	A562C155-2142-41F9-89F4-6B7D45645175.JPEG	2020-03-02 22:04:00	2020-03-02 22:04:00	2020-03-02 22:04:00	2020	3	2
16	CP288	86	Prod	1104	81	2042	23	Klinikum der Universitat Munchen- Grosshadern	DE002	World	9457	Product change TP2	0	5852	APP_PRODUCTCHANGE_TP_2	Product change TP2	19		48415	Baseplate change TP 1	0		157886	2	2020-03-05 20:00:08	2020-03-05 20:00:08	2020-07-17 12:52:32	DE002	12	12	1	1	EC88452F-4A8E-4984-A3FB-497BC16E4B6C.JPEG	2020-03-05 20:35:00	2020-03-05 20:35:00	2020-03-05 20:35:00	2020	3	5	1	1	882D0885-DE5B-48FE-B483-E6A43ED0D114.JPEG	2020-03-05 20:40:00	2020-03-05 20:40:00	2020-03-05 20:40:00	2020	3	5
16	CP288	86	Prod	1104	81	2042	23	Klinikum der Universitat Munchen- Grosshadern	DE002	World	9457	Product change TP2	0	5852	APP_PRODUCTCHANGE_TP_2	Product change TP2	19		48415	Baseplate change TP 1	0		157954	3	2020-03-06 19:00:05	2020-03-06 19:00:05	2020-07-17 12:52:32	DE002	13	13	1	1	7729C441-F08B-41C8-83AF-D4BC6A2C952A.JPEG	2020-03-06 19:29:00	2020-03-06 19:29:00	2020-03-06 19:29:00	2020	3	6	1	1	64CBE2B3-9072-42A9-9CE9-731DCB891827.JPEG	2020-03-06 19:36:00	2020-03-06 19:36:00	2020-03-06 19:36:00	2020	3	6
16	CP288	86	Prod	1104	81	2042	23	Klinikum der Universitat Munchen- Grosshadern	DE002	World	9457	Product change TP2	0	5852	APP_PRODUCTCHANGE_TP_2	Product change TP2	19		48415	Baseplate change TP 1	0		158041	4	2020-03-08 09:00:05	2020-03-08 09:00:05	2020-07-17 12:52:32	DE002	14	14	1	1	40EB4A79-765F-47A1-BDD8-996FD2792679.JPEG	2020-03-08 09:47:00	2020-03-08 09:47:00	2020-03-08 09:47:00	2020	3	8	1	1	00DCAD25-2662-4086-8DB4-C3D0BE28E455.JPEG	2020-03-08 09:51:00	2020-03-08 09:51:00	2020-03-08 09:51:00	2020	3	8
16	CP288	86	Prod	1104	81	2042	23	Klinikum der Universitat Munchen- Grosshadern	DE002	World	9457	Product change TP2	0	5852	APP_PRODUCTCHANGE_TP_2	Product change TP2	19		48415	Baseplate change TP 1	0		158295	5	2020-03-10 07:00:09	2020-03-10 07:00:09	2020-07-17 12:52:32	DE002	15	15	1	1	C504CCCA-475A-4CF4-BF0C-B90B7D0EAA31.JPEG	2020-03-10 07:34:00	2020-03-10 07:34:00	2020-03-10 07:34:00	2020	3	10	1	1	6F4E4ECD-C3AD-42DF-B915-86B67E03AE50.JPEG	2020-03-10 07:37:00	2020-03-10 07:37:00	2020-03-10 07:37:00	2020	3	10
16	CP288	86	Prod	1104	81	2042	23	Klinikum der Universitat Munchen- Grosshadern	DE002	World	9457	Product change TP2	0	5852	APP_PRODUCTCHANGE_TP_2	Product change TP2	19		48415	Baseplate change TP 1	0		158325	6	2020-03-10 14:00:17	2020-03-10 14:00:17	2020-07-17 12:52:32	DE002	16	16	1	1	33ADC565-BB2B-4D58-B1C0-60186FE9E6D1.JPEG	2020-03-10 14:14:00	2020-03-10 14:14:00	2020-03-10 14:14:00	2020	3	10	1	1	ABE049EE-A093-41E5-9B88-27E36077592A.JPEG	2020-03-10 14:18:00	2020-03-10 14:18:00	2020-03-10 14:18:00	2020	3	10
16	CP288	86	Prod	1104	81	2042	23	Klinikum der Universitat Munchen- Grosshadern	DE002	World	9457	Product change TP2	0	5852	APP_PRODUCTCHANGE_TP_2	Product change TP2	19		48415	Baseplate change TP 1	0		158376	7	2020-03-11 05:00:17	2020-03-11 05:00:17	2020-07-17 12:52:32	DE002	17	17	1	1	6BA4D910-8213-4A77-AD0B-74A2177CE12E.JPEG	2020-03-11 04:56:00	2020-03-11 04:56:00	2020-03-11 04:56:00	2020	3	11	1	1	DB9BB0A0-DB25-4D5B-98EC-9C042208426C.JPEG	2020-03-11 05:05:00	2020-03-11 05:05:00	2020-03-11 05:05:00	2020	3	11
16	CP288	86	Prod	1104	81	2042	23	Klinikum der Universitat Munchen- Grosshadern	DE002	World	9457	Product change TP2	0	5852	APP_PRODUCTCHANGE_TP_2	Product change TP2	19		48415	Baseplate change TP 1	0		158663	8	2020-03-12 21:00:02	2020-03-12 21:00:02	2020-07-17 12:52:32	DE002	18	18	1	1	AE4103CF-20C4-4A10-A595-093A0B91E287.JPEG	2020-03-12 21:38:00	2020-03-12 21:38:00	2020-03-12 21:38:00	2020	3	12	1	1	A29860E6-5398-4696-96CB-D1D6ABDF8597.JPEG	2020-03-12 21:41:00	2020-03-12 21:41:00	2020-03-12 21:41:00	2020	3	12
16	CP288	86	Prod	1104	81	2042	23	Klinikum der Universitat Munchen- Grosshadern	DE002	World	9457	Product change TP2	0	5852	APP_PRODUCTCHANGE_TP_2	Product change TP2	19		48415	Baseplate change TP 1	0		158873	9	2020-03-14 05:00:07	2020-03-14 05:00:07	2020-07-17 12:52:32	DE002	19	19	1	1	EB1815A8-AB55-434C-B98A-1D7C2878EDC9.JPEG	2020-03-14 05:15:00	2020-03-14 05:15:00	2020-03-14 05:15:00	2020	3	14	1	1	9323070E-ABAB-4021-8695-471D85AAD774.JPEG	2020-03-14 05:15:00	2020-03-14 05:15:00	2020-03-14 05:15:00	2020	3	14
16	CP288	86	Prod	1104	81	2042	23	Klinikum der Universitat Munchen- Grosshadern	DE002	World	9457	Product change TP2	0	5852	APP_PRODUCTCHANGE_TP_2	Product change TP2	19		48415	Baseplate change TP 1	0		159308	10	2020-03-16 04:00:06	2020-03-16 04:00:06	2020-07-17 12:52:32	DE002	20	20	1	1	EFA67E52-30F1-4682-85A5-2F7E3C8C5E3B.JPEG	2020-03-16 04:37:00	2020-03-16 04:37:00	2020-03-16 04:37:00	2020	3	16	1	1	BEC8EA56-06F3-4095-8E42-84E1E31D0464.JPEG	2020-03-16 04:42:00	2020-03-16 04:42:00	2020-03-16 04:42:00	2020	3	16
16	CP288	86	Prod	1104	81	2042	23	Klinikum der Universitat Munchen- Grosshadern	DE002	World	9457	Product change TP2	0	5852	APP_PRODUCTCHANGE_TP_2	Product change TP2	19		48415	Baseplate change TP 1	0		161647	11	2020-03-17 21:00:10	2020-03-17 21:00:10	2020-07-17 12:52:32	DE002	21	21	1	1	B91A0639-2FAB-4C73-99F4-2D67063EE76F.JPEG	2020-03-17 21:08:00	2020-03-17 21:08:00	2020-03-17 21:08:00	2020	3	17	1	1	5A3B92F5-2EED-4E2D-9FB1-B770ECC07800.JPEG	2020-03-17 21:16:00	2020-03-17 21:16:00	2020-03-17 21:16:00	2020	3	17
16	CP288	86	Prod	1104	81	2042	23	Klinikum der Universitat Munchen- Grosshadern	DE002	World	9457	Product change TP2	0	5852	APP_PRODUCTCHANGE_TP_2	Product change TP2	19		48415	Baseplate change TP 1	0		161742	12	2020-03-19 09:00:08	2020-03-19 09:00:08	2020-07-17 12:52:32	DE002	22	22	1	1	420F73D6-0CB7-4018-883B-D0B9A7DAC663.JPEG	2020-03-19 09:00:00	2020-03-19 09:00:00	2020-03-19 09:00:00	2020	3	19	1	1	B7829CB5-09FB-4531-996E-04EEAFB12858.JPEG	2020-03-19 09:01:00	2020-03-19 09:01:00	2020-03-19 09:01:00	2020	3	19
16	CP288	86	Prod	1104	81	2042	23	Klinikum der Universitat Munchen- Grosshadern	DE002	World	9457	Product change TP2	0	5852	APP_PRODUCTCHANGE_TP_2	Product change TP2	19		48415	Baseplate change TP 1	0		162685	13	2020-03-20 19:00:05	2020-03-20 19:00:05	2020-07-17 12:52:32	DE002	23	23	1	1	0ECA497C-378E-4F88-92BE-23B9B5648CF1.JPEG	2020-03-20 19:22:00	2020-03-20 19:22:00	2020-03-20 19:22:00	2020	3	20	1	1	52FFDF31-F774-4B50-834E-BD10E361B1A8.JPEG	2020-03-20 19:23:00	2020-03-20 19:23:00	2020-03-20 19:23:00	2020	3	20
16	CP288	86	Prod	1104	81	2042	23	Klinikum der Universitat Munchen- Grosshadern	DE002	World	9457	Product change TP2	0	5852	APP_PRODUCTCHANGE_TP_2	Product change TP2	19		48415	Baseplate change TP 1	0		162688	14	2020-03-21 00:00:06	2020-03-21 00:00:06	2020-07-17 12:52:32	DE002	24	24	1	1	C6B7A98A-AB97-430A-AF2D-AC447851B87A.JPEG	2020-03-21 00:12:00	2020-03-21 00:12:00	2020-03-21 00:12:00	2020	3	21	1	1	5C859FCE-B27E-45A1-B8DA-B536230B3286.JPEG	2020-03-21 00:19:00	2020-03-21 00:19:00	2020-03-21 00:19:00	2020	3	21
16	CP288	86	Prod	1104	81	2042	23	Klinikum der Universitat Munchen- Grosshadern	DE002	World	9457	Product change TP2	0	5852	APP_PRODUCTCHANGE_TP_2	Product change TP2	19		48415	Baseplate change TP 1	0		162904	15	2020-03-22 19:00:07	2020-03-22 19:00:07	2020-07-17 12:52:32	DE002	25	25	1	1	A4621531-3CB5-478C-8110-93A41FE819A3.JPEG	2020-03-22 19:45:00	2020-03-22 19:45:00	2020-03-22 19:45:00	2020	3	22	1	1	0D45846D-48C3-4F44-82A8-2374559782DD.JPEG	2020-03-22 19:45:00	2020-03-22 19:45:00	2020-03-22 19:45:00	2020	3	22
16	CP288	86	Prod	1104	81	2042	23	Klinikum der Universitat Munchen- Grosshadern	DE002	World	9457	Product change TP2	0	5852	APP_PRODUCTCHANGE_TP_2	Product change TP2	19		48415	Baseplate change TP 1	0		163719	16	2020-03-25 10:00:15	2020-03-25 10:00:15	2020-07-17 12:52:32	DE002	27	27	1	1	D3C57185-9ADC-48DC-88DB-477C73B94598.JPEG	2020-03-25 10:29:00	2020-03-25 10:29:00	2020-03-25 10:29:00	2020	3	25	1	1	7D06356E-0C90-4032-85F3-6FD24C1D76A0.JPEG	2020-03-25 10:32:00	2020-03-25 10:32:00	2020-03-25 10:32:00	2020	3	25
16	CP288	86	Prod	1104	81	2042	23	Klinikum der Universitat Munchen- Grosshadern	DE002	World	9457	Product change TP2	0	5852	APP_PRODUCTCHANGE_TP_2	Product change TP2	19		48415	Baseplate change TP 1	0		164212	17	2020-03-26 22:00:07	2020-03-26 22:00:07	2020-07-17 12:52:32	DE002	28	28	1	1	66F3D4B2-3170-4788-BE93-F7B740CB7326.JPEG	2020-03-26 22:50:00	2020-03-26 22:50:00	2020-03-26 22:50:00	2020	3	26	1	1	675CBCC1-074E-4EFD-A2F3-A8542D4865F8.JPEG	2020-03-26 22:53:00	2020-03-26 22:53:00	2020-03-26 22:53:00	2020	3	26
16	CP288	86	Prod	1104	81	2042	23	Klinikum der Universitat Munchen- Grosshadern	DE002	World	9457	Product change TP2	0	5852	APP_PRODUCTCHANGE_TP_2	Product change TP2	19		48415	Baseplate change TP 1	0		164623	18	2020-03-29 08:00:04	2020-03-29 08:00:04	2020-07-17 12:52:32	DE002	29	29	1	1	D3F3CB33-42E4-42DF-9CF7-A436C8AF86F0.JPEG	2020-03-29 09:17:00	2020-03-29 09:17:00	2020-03-29 09:17:00	2020	3	29	1	1	F57FA48A-F48B-42EE-A588-86A8223A9FE8.JPEG	2020-03-29 09:23:00	2020-03-29 09:23:00	2020-03-29 09:23:00	2020	3	29
16	CP288	86	Prod	1104	81	2042	23	Klinikum der Universitat Munchen- Grosshadern	DE002	World	9457	Product change TP2	0	5852	APP_PRODUCTCHANGE_TP_2	Product change TP2	19		48415	Baseplate change TP 1	0		165266	19	2020-03-31 17:00:04	2020-03-31 17:00:04	2020-07-17 12:52:32	DE002	30	30	1	1	BEC91A94-6A46-421C-AD0C-BE0DE177672C.JPEG	2020-03-31 17:31:00	2020-03-31 17:31:00	2020-03-31 17:31:00	2020	3	31	1	1	B768112D-7F79-4550-B9CF-371AA4D465C5.JPEG	2020-03-31 17:32:00	2020-03-31 17:32:00	2020-03-31 17:32:00	2020	3	31
16	CP288	86	Prod	1104	81	2042	23	Klinikum der Universitat Munchen- Grosshadern	DE002	World	9457	Product change TP2	0	5852	APP_PRODUCTCHANGE_TP_2	Product change TP2	19		48415	Baseplate change TP 1	0		168385	20	2020-04-02 07:00:20	2020-04-02 07:00:20	2020-07-17 12:52:32	DE002	31	31	1	1	A2674A17-7CE1-4DC3-AA8C-16A92FA43A28.JPEG	2020-04-02 08:08:00	2020-04-02 08:08:00	2020-04-02 08:08:00	2020	4	2	1	1	53AF604B-9B2D-4E61-9ECC-09568EA980AE.JPEG	2020-04-02 08:11:00	2020-04-02 08:11:00	2020-04-02 08:11:00	2020	4	2
16	CP288	86	Prod	1104	81	2042	23	Klinikum der Universitat Munchen- Grosshadern	DE002	World	9457	Product change TP2	0	5852	APP_PRODUCTCHANGE_TP_2	Product change TP2	19		48415	Baseplate change TP 1	0		168643	21	2020-04-04 07:00:12	2020-04-04 07:00:12	2020-07-17 12:52:32	DE002	32	32	1	1	0C828250-081F-4BBF-A1E3-88BEE7C4A097.JPEG	2020-04-04 08:04:00	2020-04-04 08:04:00	2020-04-04 08:04:00	2020	4	4	1	1	C7E145AF-BAA7-4041-94EB-D78F26E07224.JPEG	2020-04-04 08:09:00	2020-04-04 08:09:00	2020-04-04 08:09:00	2020	4	4
16	CP288	86	Prod	1104	81	2042	23	Klinikum der Universitat Munchen- Grosshadern	DE002	World	9457	Product change TP2	0	5852	APP_PRODUCTCHANGE_TP_2	Product change TP2	19		48415	Baseplate change TP 1	0		168889	22	2020-04-06 14:00:06	2020-04-06 14:00:06	2020-07-17 12:52:32	DE002	33	33	1	1	08A4E85A-DBF4-4CAB-92DF-7AADD281F658.JPEG	2020-04-06 15:53:00	2020-04-06 15:53:00	2020-04-06 15:53:00	2020	4	6	1	1	CE1B7CDE-3B48-47FE-9A95-9933E8D8A625.JPEG	2020-04-06 15:54:00	2020-04-06 15:54:00	2020-04-06 15:54:00	2020	4	6
16	CP288	86	Prod	1104	81	2042	23	Klinikum der Universitat Munchen- Grosshadern	DE002	World	9457	Product change TP2	0	5852	APP_PRODUCTCHANGE_TP_2	Product change TP2	19		48415	Baseplate change TP 1	0		169353	23	2020-04-09 19:00:08	2020-04-09 19:00:08	2020-07-17 12:52:32	DE002	34	34	1	1	91A617AD-0720-48C4-B219-E16BAB354CD2.JPEG	2020-04-09 20:29:00	2020-04-09 20:29:00	2020-04-09 20:29:00	2020	4	9	1	1	F65FEF99-F04B-46A0-8851-670AEFB635A6.JPEG	2020-04-09 20:29:00	2020-04-09 20:29:00	2020-04-09 20:29:00	2020	4	9
16	CP288	86	Prod	1104	81	2042	23	Klinikum der Universitat Munchen- Grosshadern	DE002	World	9457	Product change TP2	0	5852	APP_PRODUCTCHANGE_TP_2	Product change TP2	19		48415	Baseplate change TP 1	0		169487	24	2020-04-12 04:00:17	2020-04-12 04:00:17	2020-07-17 12:52:32	DE002	35	35	1	1	1406E46C-CB1B-46A0-9F83-7153464E4266.JPEG	2020-04-12 05:44:00	2020-04-12 05:44:00	2020-04-12 05:44:00	2020	4	12	1	1	C1D5994C-CC70-4AD3-93CF-087476CDEDEB.JPEG	2020-04-12 05:48:00	2020-04-12 05:48:00	2020-04-12 05:48:00	2020	4	12
16	CP288	86	Prod	1104	81	2042	23	Klinikum der Universitat Munchen- Grosshadern	DE002	World	9457	Product change TP2	0	5852	APP_PRODUCTCHANGE_TP_2	Product change TP2	19		48415	Baseplate change TP 1	0		169753	25	2020-04-14 07:00:20	2020-04-14 07:00:20	2020-07-17 12:52:32	DE002	36	36	1	1	D76039DE-5E9D-4CD6-A3C9-BFDDCF9F6BAE.JPEG	2020-04-14 08:14:00	2020-04-14 08:14:00	2020-04-14 08:14:00	2020	4	14	1	1	AD97750E-CDAE-490E-977F-39EBB999BAE2.JPEG	2020-04-14 08:17:00	2020-04-14 08:17:00	2020-04-14 08:17:00	2020	4	14
16	CP288	86	Prod	1104	81	2042	23	Klinikum der Universitat Munchen- Grosshadern	DE002	World	9457	Product change TP2	0	5852	APP_PRODUCTCHANGE_TP_2	Product change TP2	19		48415	Baseplate change TP 1	0		170059	26	2020-04-15 19:00:04	2020-04-15 19:00:04	2020-07-17 12:52:32	DE002	37	37	1	1	D16C89E3-A85B-4C98-A19C-00D730EB13CF.JPEG	2020-04-15 20:10:00	2020-04-15 20:10:00	2020-04-15 20:10:00	2020	4	15	1	1	2C8A9A32-9A37-474E-BFCB-7D1A5B22456B.JPEG	2020-04-15 20:12:00	2020-04-15 20:12:00	2020-04-15 20:12:00	2020	4	15
16	CP288	86	Prod	1105	81	2043	23	Klinikum der Universitat Munchen- Grosshadern	DE002	World	9485	Product change TP1	0	5849	APP_PRODUCTCHANGE_TP_1	Product change TP1	17		48474	Baseplate change TP 1	0		132019	1	2020-01-30 23:00:05	2020-01-30 23:00:05	2020-07-17 12:52:32	DE002	0	0	1	1	1D0E2956-2DA4-4013-82C7-F576708CCAD2.JPEG	2020-01-30 23:23:00	2020-01-30 23:23:00	2020-01-30 23:23:00	2020	1	30	1	1	490FE51E-2188-461E-A9D1-A2B6876DF2B4.JPEG	2020-01-30 23:36:00	2020-01-30 23:36:00	2020-01-30 23:36:00	2020	1	30
16	CP288	86	Prod	1105	81	2043	23	Klinikum der Universitat Munchen- Grosshadern	DE002	World	9488	Product change TP2	0	5852	APP_PRODUCTCHANGE_TP_2	Product change TP2	19		48475	Baseplate change TP 1	0		132021	1	2020-03-11 14:00:12	2020-03-11 14:00:12	2020-07-17 12:52:32	DE002	38	38	1	1	7A0071E5-4A6C-4097-9C81-8F58C554CCAB.JPEG	2020-03-11 14:21:00	2020-03-11 14:21:00	2020-03-11 14:21:00	2020	3	11	1	1	615E503E-131F-461E-8DFE-CF4FA56161BC.JPEG	2020-03-11 14:21:00	2020-03-11 14:21:00	2020-03-11 14:21:00	2020	3	11
16	CP288	86	Prod	1105	81	2043	23	Klinikum der Universitat Munchen- Grosshadern	DE002	World	9485	Product change TP1	0	5849	APP_PRODUCTCHANGE_TP_1	Product change TP1	17		48474	Baseplate change TP 1	0		144411	2	2020-02-01 23:00:05	2020-02-01 23:00:05	2020-07-17 12:52:32	DE002	1	1	1	1	5476C8E7-DD8A-4B8E-AAF3-1E1C2AC7F2E6.JPEG	2020-01-31 23:26:00	2020-01-31 23:26:00	2020-01-31 23:26:00	2020	1	31	1	1	20AF6974-787F-4BC2-B152-90BFD84A00B4.JPEG	2020-01-31 23:37:00	2020-01-31 23:37:00	2020-01-31 23:37:00	2020	1	31
16	CP288	86	Prod	1105	81	2043	23	Klinikum der Universitat Munchen- Grosshadern	DE002	World	9485	Product change TP1	0	5849	APP_PRODUCTCHANGE_TP_1	Product change TP1	17		48474	Baseplate change TP 1	0		144416	3	2020-02-02 22:00:09	2020-02-02 22:00:09	2020-07-17 12:52:32	DE002	2	2	1	1	288D73CF-85AF-4011-91D1-BB1849810382.JPEG	2020-02-02 22:41:00	2020-02-02 22:41:00	2020-02-02 22:41:00	2020	2	2	1	1	2BE200A8-0BA6-44A7-8AFD-CE65B633C556.JPEG	2020-02-02 22:52:00	2020-02-02 22:52:00	2020-02-02 22:52:00	2020	2	2
16	CP288	86	Prod	1105	81	2043	23	Klinikum der Universitat Munchen- Grosshadern	DE002	World	9485	Product change TP1	0	5849	APP_PRODUCTCHANGE_TP_1	Product change TP1	17		48474	Baseplate change TP 1	0		144685	4	2020-02-04 10:00:05	2020-02-04 10:00:05	2020-07-17 12:52:32	DE002	3	3	1	1	4091821C-5203-4D84-AB28-6D6916250DC0.JPEG	2020-02-04 09:55:00	2020-02-04 09:55:00	2020-02-04 09:55:00	2020	2	4	1	1	56192F54-3F5D-4F68-80D0-9EDCF8BE96BD.JPEG	2020-02-04 10:01:00	2020-02-04 10:01:00	2020-02-04 10:01:00	2020	2	4
16	CP288	86	Prod	1105	81	2043	23	Klinikum der Universitat Munchen- Grosshadern	DE002	World	9485	Product change TP1	0	5849	APP_PRODUCTCHANGE_TP_1	Product change TP1	17		48474	Baseplate change TP 1	0		144918	5	2020-02-05 23:00:11	2020-02-05 23:00:11	2020-07-17 12:52:32	DE002	4	4	1	1	B83CF6CD-FEBD-418A-A5B6-309206BE9ABA.JPEG	2020-02-04 18:25:00	2020-02-04 18:25:00	2020-02-04 18:25:00	2020	2	4	1	1	2ACD1DE3-BB79-4D63-AE03-02EBEBFEE8EB.JPEG	2020-02-04 18:31:00	2020-02-04 18:31:00	2020-02-04 18:31:00	2020	2	4
16	CP288	86	Prod	1105	81	2043	23	Klinikum der Universitat Munchen- Grosshadern	DE002	World	9485	Product change TP1	0	5849	APP_PRODUCTCHANGE_TP_1	Product change TP1	17		48474	Baseplate change TP 1	0		144921	6	2020-02-05 23:00:22	2020-02-05 23:00:22	2020-07-17 12:52:32	DE002	5	5	1	1	7D000080-ACC7-42ED-AFFB-41A4F2A0955F.JPEG	2020-02-05 23:13:00	2020-02-05 23:13:00	2020-02-05 23:13:00	2020	2	5	1	1	B39214D4-95CA-44E0-A844-92A32BEA67EC.JPEG	2020-02-05 23:13:00	2020-02-05 23:13:00	2020-02-05 23:13:00	2020	2	5
16	CP288	86	Prod	1105	81	2043	23	Klinikum der Universitat Munchen- Grosshadern	DE002	World	9485	Product change TP1	0	5849	APP_PRODUCTCHANGE_TP_1	Product change TP1	17		48474	Baseplate change TP 1	0		145949	7	2020-02-06 13:00:13	2020-02-06 13:00:13	2020-07-17 12:52:32	DE002	6	6	1	1	B232B1D2-7AC5-4FDE-836D-E9D850C38923.JPEG	2020-02-06 13:26:00	2020-02-06 13:26:00	2020-02-06 13:26:00	2020	2	6	1	1	B949027D-014F-4B8D-83C0-5AE22F3FDC37.JPEG	2020-02-06 13:27:00	2020-02-06 13:27:00	2020-02-06 13:27:00	2020	2	6
16	CP288	86	Prod	1105	81	2043	23	Klinikum der Universitat Munchen- Grosshadern	DE002	World	9485	Product change TP1	0	5849	APP_PRODUCTCHANGE_TP_1	Product change TP1	17		48474	Baseplate change TP 1	0		145980	8	2020-02-07 10:00:19	2020-02-07 10:00:19	2020-07-17 12:52:32	DE002	7	7	1	1	55BDFEE0-CCFB-4C81-926E-721D3D408FB6.JPEG	2020-02-07 10:27:00	2020-02-07 10:27:00	2020-02-07 10:27:00	2020	2	7	1	1	1A1CC1B0-BD0D-4B32-A12A-AD90708890D1.JPEG	2020-02-07 10:35:00	2020-02-07 10:35:00	2020-02-07 10:35:00	2020	2	7
16	CP288	86	Prod	1105	81	2043	23	Klinikum der Universitat Munchen- Grosshadern	DE002	World	9485	Product change TP1	0	5849	APP_PRODUCTCHANGE_TP_1	Product change TP1	17		48474	Baseplate change TP 1	0		146030	9	2020-02-08 23:00:09	2020-02-08 23:00:09	2020-07-17 12:52:32	DE002	8	8	1	1	89DA812C-885F-45CC-83A5-764B5909213E.JPEG	2020-02-08 23:30:00	2020-02-08 23:30:00	2020-02-08 23:30:00	2020	2	8	1	1	5B27174D-2BB3-4490-99F1-38C944823C89.JPEG	2020-02-08 23:41:00	2020-02-08 23:41:00	2020-02-08 23:41:00	2020	2	8
16	CP288	86	Prod	1105	81	2043	23	Klinikum der Universitat Munchen- Grosshadern	DE002	World	9485	Product change TP1	0	5849	APP_PRODUCTCHANGE_TP_1	Product change TP1	17		48474	Baseplate change TP 1	0		146062	10	2020-02-10 09:00:17	2020-02-10 09:00:17	2020-07-17 12:52:32	DE002	9	9	1	1	55579F35-2ABA-44AF-95F3-03AD687E03CA.JPEG	2020-02-09 17:55:00	2020-02-09 17:55:00	2020-02-09 17:55:00	2020	2	9	1	1	9AE53F27-9531-40DF-87E1-0C64267F1CC6.JPEG	2020-02-09 18:02:00	2020-02-09 18:02:00	2020-02-09 18:02:00	2020	2	9
16	CP288	86	Prod	1105	81	2043	23	Klinikum der Universitat Munchen- Grosshadern	DE002	World	9485	Product change TP1	0	5849	APP_PRODUCTCHANGE_TP_1	Product change TP1	17		48474	Baseplate change TP 1	0		146065	11	2020-02-10 10:00:09	2020-02-10 10:00:09	2020-07-17 12:52:32	DE002	10	10	1	1	1CAB597C-EAFA-495F-B238-B8D9B53848D4.JPEG	2020-02-10 09:48:00	2020-02-10 09:48:00	2020-02-10 09:48:00	2020	2	10	1	1	656E6D87-CBC3-4122-9458-A6F05BBB679F.JPEG	2020-02-10 09:58:00	2020-02-10 09:58:00	2020-02-10 09:58:00	2020	2	10
16	CP288	86	Prod	1105	81	2043	23	Klinikum der Universitat Munchen- Grosshadern	DE002	World	9485	Product change TP1	0	5849	APP_PRODUCTCHANGE_TP_1	Product change TP1	17		48474	Baseplate change TP 1	0		146095	12	2020-02-10 22:00:05	2020-02-10 22:00:05	2020-07-17 12:52:32	DE002	11	11	1	1	D1D33C33-5F2E-43D0-809B-F25E28618219.JPEG	2020-02-10 22:18:00	2020-02-10 22:18:00	2020-02-10 22:18:00	2020	2	10	1	1	BC564CD7-1FD4-4905-9248-AA49BB46310A.JPEG	2020-02-10 22:30:00	2020-02-10 22:30:00	2020-02-10 22:30:00	2020	2	10
16	CP288	86	Prod	1105	81	2043	23	Klinikum der Universitat Munchen- Grosshadern	DE002	World	9485	Product change TP1	0	5849	APP_PRODUCTCHANGE_TP_1	Product change TP1	17		48474	Baseplate change TP 1	0		146164	13	2020-02-11 20:00:13	2020-02-11 20:00:13	2020-07-17 12:52:32	DE002	12	12	1	1	1D58BD0D-0AFB-4E68-96D0-8CEBB3F31D79.JPEG	2020-02-11 20:08:00	2020-02-11 20:08:00	2020-02-11 20:08:00	2020	2	11	1	1	A4B88900-EF75-4296-A6F5-02A4358CD7F5.JPEG	2020-02-11 20:09:00	2020-02-11 20:09:00	2020-02-11 20:09:00	2020	2	11
16	CP288	86	Prod	1105	81	2043	23	Klinikum der Universitat Munchen- Grosshadern	DE002	World	9485	Product change TP1	0	5849	APP_PRODUCTCHANGE_TP_1	Product change TP1	17		48474	Baseplate change TP 1	0		146416	14	2020-02-12 12:00:08	2020-02-12 12:00:08	2020-07-17 12:52:32	DE002	13	13	1	1	FF6F260C-A548-4767-A399-5A6A7CCC0EE9.JPEG	2020-02-12 11:59:00	2020-02-12 11:59:00	2020-02-12 11:59:00	2020	2	12	1	1	B914C72E-7627-42D5-B1D6-7E49FFA8C1D2.JPEG	2020-02-12 11:59:00	2020-02-12 11:59:00	2020-02-12 11:59:00	2020	2	12
16	CP288	86	Prod	1105	81	2043	23	Klinikum der Universitat Munchen- Grosshadern	DE002	World	9485	Product change TP1	0	5849	APP_PRODUCTCHANGE_TP_1	Product change TP1	17		48474	Baseplate change TP 1	0		146428	15	2020-02-12 20:00:09	2020-02-12 20:00:09	2020-07-17 12:52:32	DE002	14	14	1	1	EAB34276-4561-408B-8B80-7F020454478D.JPEG	2020-02-12 20:01:00	2020-02-12 20:01:00	2020-02-12 20:01:00	2020	2	12	1	1	D68E0F10-77BC-455D-A942-8DB759C2F479.JPEG	2020-02-12 20:02:00	2020-02-12 20:02:00	2020-02-12 20:02:00	2020	2	12
16	CP288	86	Prod	1105	81	2043	23	Klinikum der Universitat Munchen- Grosshadern	DE002	World	9485	Product change TP1	0	5849	APP_PRODUCTCHANGE_TP_1	Product change TP1	17		48474	Baseplate change TP 1	0		146449	16	2020-02-13 09:00:05	2020-02-13 09:00:05	2020-07-17 12:52:32	DE002	15	15	1	1	BFC56841-8747-414A-B9DE-BD2D89039E5A.JPEG	2020-02-13 09:42:00	2020-02-13 09:42:00	2020-02-13 09:42:00	2020	2	13	1	1	81CB5732-79D5-4547-8921-FC3DF89D9F36.JPEG	2020-02-13 09:42:00	2020-02-13 09:42:00	2020-02-13 09:42:00	2020	2	13
16	CP288	86	Prod	1105	81	2043	23	Klinikum der Universitat Munchen- Grosshadern	DE002	World	9485	Product change TP1	0	5849	APP_PRODUCTCHANGE_TP_1	Product change TP1	17		48474	Baseplate change TP 1	0		146459	17	2020-02-13 20:00:09	2020-02-13 20:00:09	2020-07-17 12:52:32	DE002	16	16	1	1	C23DE7F9-6DF2-45BE-897D-E079A1CDE196.JPEG	2020-02-13 19:52:00	2020-02-13 19:52:00	2020-02-13 19:52:00	2020	2	13	1	1	4E147D02-2F5D-4750-B4F7-DBB163043EEF.JPEG	2020-02-13 19:52:00	2020-02-13 19:52:00	2020-02-13 19:52:00	2020	2	13
16	CP288	86	Prod	1105	81	2043	23	Klinikum der Universitat Munchen- Grosshadern	DE002	World	9485	Product change TP1	0	5849	APP_PRODUCTCHANGE_TP_1	Product change TP1	17		48474	Baseplate change TP 1	0		146571	18	2020-02-16 20:00:04	2020-02-16 20:00:04	2020-07-17 12:52:32	DE002	17	17	1	1	B0DFC769-1B58-4E77-92B8-C210DBF624AA.JPEG	2020-02-15 03:51:00	2020-02-15 03:51:00	2020-02-15 03:51:00	2020	2	15	1	1	0FA4B221-F6AA-4B26-A94C-620CCE3690F4.JPEG	2020-02-15 03:51:00	2020-02-15 03:51:00	2020-02-15 03:51:00	2020	2	15
16	CP288	86	Prod	1105	81	2043	23	Klinikum der Universitat Munchen- Grosshadern	DE002	World	9485	Product change TP1	0	5849	APP_PRODUCTCHANGE_TP_1	Product change TP1	17		48474	Baseplate change TP 1	0		146574	19	2020-02-16 20:00:06	2020-02-16 20:00:06	2020-07-17 12:52:32	DE002	18	18	1	1	E17F8F37-8F8E-4E17-9843-F06CED9B92E4.JPEG	2020-02-16 20:23:00	2020-02-16 20:23:00	2020-02-16 20:23:00	2020	2	16	1	1	E6DE33AA-3E55-4C6F-8ADF-372DCB53E1EE.JPEG	2020-02-16 20:24:00	2020-02-16 20:24:00	2020-02-16 20:24:00	2020	2	16
16	CP288	86	Prod	1105	81	2043	23	Klinikum der Universitat Munchen- Grosshadern	DE002	World	9485	Product change TP1	0	5849	APP_PRODUCTCHANGE_TP_1	Product change TP1	17		48474	Baseplate change TP 1	0		146612	20	2020-02-17 10:00:04	2020-02-17 10:00:04	2020-07-17 12:52:32	DE002	19	19	1	1	7D3F272D-61B1-4844-B966-D24DA0CAAB84.JPEG	2020-02-17 10:19:00	2020-02-17 10:19:00	2020-02-17 10:19:00	2020	2	17	1	1	FC1A93C4-9408-44F9-8429-1749BA1C149F.JPEG	2020-02-17 10:19:00	2020-02-17 10:19:00	2020-02-17 10:19:00	2020	2	17
16	CP288	86	Prod	1105	81	2043	23	Klinikum der Universitat Munchen- Grosshadern	DE002	World	9485	Product change TP1	0	5849	APP_PRODUCTCHANGE_TP_1	Product change TP1	17		48474	Baseplate change TP 1	0		149933	21	2020-02-19 09:00:05	2020-02-19 09:00:05	2020-07-17 12:52:32	DE002	20	20	1	1	1D774199-882D-4F15-9E4E-633F97B1C779.JPEG	2020-02-19 09:02:00	2020-02-19 09:02:00	2020-02-19 09:02:00	2020	2	19	1	1	9E8E93AE-5057-4B01-87DB-67E8D369F487.JPEG	2020-02-19 09:02:00	2020-02-19 09:02:00	2020-02-19 09:02:00	2020	2	19
16	CP288	86	Prod	1105	81	2043	23	Klinikum der Universitat Munchen- Grosshadern	DE002	World	9485	Product change TP1	0	5849	APP_PRODUCTCHANGE_TP_1	Product change TP1	17		48474	Baseplate change TP 1	0		150466	22	2020-02-19 19:00:08	2020-02-19 19:00:08	2020-07-17 12:52:32	DE002	21	21	1	1	83CB9A0A-719D-4A59-A8F3-9380C66AC5EE.JPEG	2020-02-19 19:13:00	2020-02-19 19:13:00	2020-02-19 19:13:00	2020	2	19	1	1	F54ED933-CA16-432B-B6B9-CF1CDDDBB204.JPEG	2020-02-19 19:13:00	2020-02-19 19:13:00	2020-02-19 19:13:00	2020	2	19
16	CP288	86	Prod	1105	81	2043	23	Klinikum der Universitat Munchen- Grosshadern	DE002	World	9485	Product change TP1	0	5849	APP_PRODUCTCHANGE_TP_1	Product change TP1	17		48474	Baseplate change TP 1	0		152780	23	2020-02-22 17:00:16	2020-02-22 17:00:16	2020-07-17 12:52:32	DE002	23	23	1	1	EF299CB3-D8A2-4A0E-8D60-358BA9B66342.JPEG	2020-02-22 17:04:00	2020-02-22 17:04:00	2020-02-22 17:04:00	2020	2	22	1	1	5704292B-F3F5-48DF-8CE5-A93A3657B6CC.JPEG	2020-02-22 17:04:00	2020-02-22 17:04:00	2020-02-22 17:04:00	2020	2	22
16	CP288	86	Prod	1105	81	2043	23	Klinikum der Universitat Munchen- Grosshadern	DE002	World	9485	Product change TP1	0	5849	APP_PRODUCTCHANGE_TP_1	Product change TP1	17		48474	Baseplate change TP 1	0		153191	24	2020-02-24 22:00:06	2020-02-24 22:00:06	2020-07-17 12:52:32	DE002	24	24	1	1	89944E43-C893-46F2-A7A2-649E3E0F6DF9.JPEG	2020-02-23 11:12:00	2020-02-23 11:12:00	2020-02-23 11:12:00	2020	2	23	1	1	DBA81DCE-6DC6-476C-8949-0E944B766046.JPEG	2020-02-23 11:12:00	2020-02-23 11:12:00	2020-02-23 11:12:00	2020	2	23
16	CP288	86	Prod	1105	81	2043	23	Klinikum der Universitat Munchen- Grosshadern	DE002	World	9485	Product change TP1	0	5849	APP_PRODUCTCHANGE_TP_1	Product change TP1	17		48474	Baseplate change TP 1	0		153200	25	2020-02-25 02:00:12	2020-02-25 02:00:12	2020-07-17 12:52:32	DE002	25	25	1	1	4ACC1957-F97D-4561-B327-36F73D8749CC.JPEG	2020-02-24 10:05:00	2020-02-24 10:05:00	2020-02-24 10:05:00	2020	2	24	1	1	3FBB9EE3-0452-4F2E-A358-7A176F687F34.JPEG	2020-02-24 10:05:00	2020-02-24 10:05:00	2020-02-24 10:05:00	2020	2	24
16	CP288	86	Prod	1105	81	2043	23	Klinikum der Universitat Munchen- Grosshadern	DE002	World	9485	Product change TP1	0	5849	APP_PRODUCTCHANGE_TP_1	Product change TP1	17		48474	Baseplate change TP 1	0		153825	26	2020-02-25 10:00:07	2020-02-25 10:00:07	2020-07-17 12:52:32	DE002	26	26	1	1	76564B55-4F14-4CF7-B2AE-16238FC74CDB.JPEG	2020-02-24 22:47:00	2020-02-24 22:47:00	2020-02-24 22:47:00	2020	2	24	1	1	B7510275-FDDA-42AF-B3FD-948266E6EB5B.JPEG	2020-02-24 22:47:00	2020-02-24 22:47:00	2020-02-24 22:47:00	2020	2	24
16	CP288	86	Prod	1105	81	2043	23	Klinikum der Universitat Munchen- Grosshadern	DE002	World	9485	Product change TP1	0	5849	APP_PRODUCTCHANGE_TP_1	Product change TP1	17		48474	Baseplate change TP 1	0		153828	27	2020-02-25 10:00:13	2020-02-25 10:00:13	2020-07-17 12:52:32	DE002	27	27	1	1	802F82B9-C839-495F-AD67-D3302743E3F2.JPEG	2020-02-25 10:10:00	2020-02-25 10:10:00	2020-02-25 10:10:00	2020	2	25	1	1	B79DB660-623A-487C-9B84-C1206D83BC3C.JPEG	2020-02-25 10:11:00	2020-02-25 10:11:00	2020-02-25 10:11:00	2020	2	25
16	CP288	86	Prod	1105	81	2043	23	Klinikum der Universitat Munchen- Grosshadern	DE002	World	9485	Product change TP1	0	5849	APP_PRODUCTCHANGE_TP_1	Product change TP1	17		48474	Baseplate change TP 1	0		154795	28	2020-02-29 08:00:09	2020-02-29 08:00:09	2020-07-17 12:52:32	DE002	28	28	1	1	F08719EF-93E4-407C-879C-9E97B875F766.JPEG	2020-02-27 09:40:00	2020-02-27 09:40:00	2020-02-27 09:40:00	2020	2	27	1	1	D713B70D-C8FE-45C5-8713-AA6F04CC0CED.JPEG	2020-02-27 09:41:00	2020-02-27 09:41:00	2020-02-27 09:41:00	2020	2	27
16	CP288	86	Prod	1105	81	2043	23	Klinikum der Universitat Munchen- Grosshadern	DE002	World	9485	Product change TP1	0	5849	APP_PRODUCTCHANGE_TP_1	Product change TP1	17		48474	Baseplate change TP 1	0		156496	29	2020-03-03 10:00:39	2020-03-03 10:00:39	2020-07-17 12:52:32	DE002	30	30	1	1	4272F1F4-27F7-45C5-96C8-62B3473FB092.JPEG	2020-03-01 11:03:00	2020-03-01 11:03:00	2020-03-01 11:03:00	2020	3	1	1	1	A3F86076-6C8F-4D69-BFA7-EA8E35E69776.JPEG	2020-03-01 11:03:00	2020-03-01 11:03:00	2020-03-01 11:03:00	2020	3	1
16	CP288	86	Prod	1105	81	2043	23	Klinikum der Universitat Munchen- Grosshadern	DE002	World	9485	Product change TP1	0	5849	APP_PRODUCTCHANGE_TP_1	Product change TP1	17		48474	Baseplate change TP 1	0		156499	30	2020-03-03 10:00:42	2020-03-03 10:00:42	2020-07-17 12:52:32	DE002	31	31	1	1	0A78F0C2-8093-4553-A797-177814651265.JPEG	2020-03-03 10:16:00	2020-03-03 10:16:00	2020-03-03 10:16:00	2020	3	3	1	1	0E7762BA-4E0B-41B4-A1CA-5419D5B1074A.JPEG	2020-03-03 10:16:00	2020-03-03 10:16:00	2020-03-03 10:16:00	2020	3	3
16	CP288	86	Prod	1105	81	2043	23	Klinikum der Universitat Munchen- Grosshadern	DE002	World	9485	Product change TP1	0	5849	APP_PRODUCTCHANGE_TP_1	Product change TP1	17		48474	Baseplate change TP 1	0		157813	31	2020-03-05 07:00:07	2020-03-05 07:00:07	2020-07-17 12:52:32	DE002	32	32	1	1	F19D8AAF-2374-4DD6-A56D-75669E6DD5CF.JPEG	2020-03-05 07:29:00	2020-03-05 07:29:00	2020-03-05 07:29:00	2020	3	5	1	1	CC09129D-B154-4659-B1BB-96F3D44434D6.JPEG	2020-03-05 07:29:00	2020-03-05 07:29:00	2020-03-05 07:29:00	2020	3	5
16	CP288	86	Prod	1105	81	2043	23	Klinikum der Universitat Munchen- Grosshadern	DE002	World	9485	Product change TP1	0	5849	APP_PRODUCTCHANGE_TP_1	Product change TP1	17		48474	Baseplate change TP 1	0		158079	32	2020-03-08 17:00:08	2020-03-08 17:00:08	2020-07-17 12:52:32	DE002	34	34	1	1	1CC788B2-A45A-4D16-AB52-3AB255E1101F.JPEG	2020-03-08 17:16:00	2020-03-08 17:16:00	2020-03-08 17:16:00	2020	3	8	1	1	2BC743FD-5467-480A-8EE8-26D59F7EF93D.JPEG	2020-03-08 17:16:00	2020-03-08 17:16:00	2020-03-08 17:16:00	2020	3	8
16	CP288	86	Prod	1105	81	2043	23	Klinikum der Universitat Munchen- Grosshadern	DE002	World	9485	Product change TP1	0	5849	APP_PRODUCTCHANGE_TP_1	Product change TP1	17		48474	Baseplate change TP 1	0		158268	33	2020-03-09 20:00:05	2020-03-09 20:00:05	2020-07-17 12:52:32	DE002	33	33	1	1	960CB4DA-9413-4DA5-9C3D-0CE1901463A4.JPEG	2020-03-07 08:00:00	2020-03-07 08:00:00	2020-03-07 08:00:00	2020	3	7	1	1	75DBED7C-CE25-4125-9549-DCA65FCA14C7.JPEG	2020-03-07 08:00:00	2020-03-07 08:00:00	2020-03-07 08:00:00	2020	3	7
16	CP288	86	Prod	1105	81	2043	23	Klinikum der Universitat Munchen- Grosshadern	DE002	World	9485	Product change TP1	0	5849	APP_PRODUCTCHANGE_TP_1	Product change TP1	17		48474	Baseplate change TP 1	0		158426	34	2020-03-11 13:00:20	2020-03-11 13:00:20	2020-07-17 12:52:32	DE002	35	35	1	1	2E526B72-A7F3-4761-B873-37F35FE788B7.JPEG	2020-03-09 20:16:00	2020-03-09 20:16:00	2020-03-09 20:16:00	2020	3	9	1	1	35AF9247-9DE8-4B4F-8E1B-F0F52DD78ADC.JPEG	2020-03-09 20:16:00	2020-03-09 20:16:00	2020-03-09 20:16:00	2020	3	9
16	CP288	86	Prod	1105	81	2043	23	Klinikum der Universitat Munchen- Grosshadern	DE002	World	9485	Product change TP1	0	5849	APP_PRODUCTCHANGE_TP_1	Product change TP1	17		48474	Baseplate change TP 1	0		158431	35	2020-03-11 14:00:07	2020-03-11 14:00:07	2020-07-17 12:52:32	DE002	36	36	1	1	A60E252B-0EAF-4210-BEE2-A8C61663CCDE.JPEG	2020-03-10 16:19:00	2020-03-10 16:19:00	2020-03-10 16:19:00	2020	3	10	1	1	EEC1FAD8-8144-4414-9821-C81296B61AAB.JPEG	2020-03-10 16:20:00	2020-03-10 16:20:00	2020-03-10 16:20:00	2020	3	10
16	CP288	86	Prod	1105	81	2043	23	Klinikum der Universitat Munchen- Grosshadern	DE002	World	9488	Product change TP2	0	5852	APP_PRODUCTCHANGE_TP_2	Product change TP2	19		48475	Baseplate change TP 1	0		158453	2	2020-03-11 20:00:06	2020-03-11 20:00:06	2020-07-17 12:52:32	DE002	39	39	1	1	981F0799-B7D7-4D11-9D37-0AB064A87642.JPEG	2020-03-11 20:38:00	2020-03-11 20:38:00	2020-03-11 20:38:00	2020	3	11	1	1	15359F1D-3540-4DBA-AEE2-648E0B0A400B.JPEG	2020-03-11 20:38:00	2020-03-11 20:38:00	2020-03-11 20:38:00	2020	3	11
16	CP288	86	Prod	1105	81	2043	23	Klinikum der Universitat Munchen- Grosshadern	DE002	World	9488	Product change TP2	0	5852	APP_PRODUCTCHANGE_TP_2	Product change TP2	19		48475	Baseplate change TP 1	0		159140	3	2020-03-15 19:00:24	2020-03-15 19:00:24	2020-07-17 12:52:32	DE002	40	40	1	1	99CB7820-7F7C-41D7-9471-8E01B898DB7D.JPEG	2020-03-12 07:41:00	2020-03-12 07:41:00	2020-03-12 07:41:00	2020	3	12	1	1	4F982146-B4EF-44B4-AEE3-DA08800C1FC1.JPEG	2020-03-12 07:42:00	2020-03-12 07:42:00	2020-03-12 07:42:00	2020	3	12
16	CP288	86	Prod	1105	81	2043	23	Klinikum der Universitat Munchen- Grosshadern	DE002	World	9488	Product change TP2	0	5852	APP_PRODUCTCHANGE_TP_2	Product change TP2	19		48475	Baseplate change TP 1	0		159143	4	2020-03-15 19:00:28	2020-03-15 19:00:28	2020-07-17 12:52:32	DE002	41	41	1	1	43BA7D05-605B-4FA7-B303-45C8270A125B.JPEG	2020-03-13 18:22:00	2020-03-13 18:22:00	2020-03-13 18:22:00	2020	3	13	1	1	F88A6874-98C4-49A7-B971-3FD5F096CF22.JPEG	2020-03-13 18:28:00	2020-03-13 18:28:00	2020-03-13 18:28:00	2020	3	13
16	CP288	86	Prod	1105	81	2043	23	Klinikum der Universitat Munchen- Grosshadern	DE002	World	9488	Product change TP2	0	5852	APP_PRODUCTCHANGE_TP_2	Product change TP2	19		48475	Baseplate change TP 1	0		159146	5	2020-03-15 19:00:31	2020-03-15 19:00:31	2020-07-17 12:52:32	DE002	42	42	1	1	A5568BD1-FABE-479C-9C90-DBF3ABF0408C.JPEG	2020-03-15 18:49:00	2020-03-15 18:49:00	2020-03-15 18:49:00	2020	3	15	1	1	33A38A3D-06F6-4B1E-9D67-787B156309D5.JPEG	2020-03-15 18:49:00	2020-03-15 18:49:00	2020-03-15 18:49:00	2020	3	15
16	CP288	86	Prod	1105	81	2043	23	Klinikum der Universitat Munchen- Grosshadern	DE002	World	9488	Product change TP2	0	5852	APP_PRODUCTCHANGE_TP_2	Product change TP2	19		48475	Baseplate change TP 1	0		161236	6	2020-03-17 19:00:07	2020-03-17 19:00:07	2020-07-17 12:52:32	DE002	43	43	1	1	925230E2-4FBD-4BBD-BA49-0AA6F751F3C2.JPEG	2020-03-17 19:29:00	2020-03-17 19:29:00	2020-03-17 19:29:00	2020	3	17	1	1	6A653A70-B9C9-4AFE-BEE0-9160166624A7.JPEG	2020-03-17 19:29:00	2020-03-17 19:29:00	2020-03-17 19:29:00	2020	3	17
16	CP288	86	Prod	1105	81	2043	23	Klinikum der Universitat Munchen- Grosshadern	DE002	World	9488	Product change TP2	0	5852	APP_PRODUCTCHANGE_TP_2	Product change TP2	19		48475	Baseplate change TP 1	0		161906	7	2020-03-19 11:00:04	2020-03-19 11:00:04	2020-07-17 12:52:32	DE002	44	44	1	1	2E322BDE-8000-46DD-A4ED-C2DB0419F4FC.JPEG	2020-03-19 11:08:00	2020-03-19 11:08:00	2020-03-19 11:08:00	2020	3	19	1	1	1A6FBA1C-62D5-4F30-B781-BD8E194BA672.JPEG	2020-03-19 11:08:00	2020-03-19 11:08:00	2020-03-19 11:08:00	2020	3	19
16	CP288	86	Prod	1105	81	2043	23	Klinikum der Universitat Munchen- Grosshadern	DE002	World	9488	Product change TP2	0	5852	APP_PRODUCTCHANGE_TP_2	Product change TP2	19		48475	Baseplate change TP 1	0		163422	8	2020-03-24 07:00:21	2020-03-24 07:00:21	2020-07-17 12:52:32	DE002	45	45	1	1	464C025E-3968-41D6-9731-5794B21CA5DB.JPEG	2020-03-22 09:03:00	2020-03-22 09:03:00	2020-03-22 09:03:00	2020	3	22	1	1	3A7D91A0-31D6-42D5-8560-BF748CC29D16.JPEG	2020-03-22 09:03:00	2020-03-22 09:03:00	2020-03-22 09:03:00	2020	3	22
16	CP288	86	Prod	1105	81	2043	23	Klinikum der Universitat Munchen- Grosshadern	DE002	World	9488	Product change TP2	0	5852	APP_PRODUCTCHANGE_TP_2	Product change TP2	19		48475	Baseplate change TP 1	0		163431	9	2020-03-24 08:00:04	2020-03-24 08:00:04	2020-07-17 12:52:32	DE002	46	46	1	1	79A288D2-B894-486D-AA2A-0EA5B6566E13.JPEG	2020-03-24 07:59:00	2020-03-24 07:59:00	2020-03-24 07:59:00	2020	3	24	1	1	CB7459E0-D0F5-43EC-BB34-430112B9F66B.JPEG	2020-03-24 08:00:00	2020-03-24 08:00:00	2020-03-24 08:00:00	2020	3	24
16	CP288	86	Prod	1105	81	2043	23	Klinikum der Universitat Munchen- Grosshadern	DE002	World	9488	Product change TP2	0	5852	APP_PRODUCTCHANGE_TP_2	Product change TP2	19		48475	Baseplate change TP 1	0		163494	10	2020-03-24 20:00:06	2020-03-24 20:00:06	2020-07-17 12:52:32	DE002	47	47	1	1	4FF4EB4B-DB72-44C0-907B-57BE57FAD46D.JPEG	2020-03-24 19:52:00	2020-03-24 19:52:00	2020-03-24 19:52:00	2020	3	24	1	1	24EA8F63-0204-46D7-9595-631B8D5CA831.JPEG	2020-03-24 19:52:00	2020-03-24 19:52:00	2020-03-24 19:52:00	2020	3	24
16	CP288	86	Prod	1105	81	2043	23	Klinikum der Universitat Munchen- Grosshadern	DE002	World	9488	Product change TP2	0	5852	APP_PRODUCTCHANGE_TP_2	Product change TP2	19		48475	Baseplate change TP 1	0		164417	11	2020-03-27 08:00:04	2020-03-27 08:00:04	2020-07-17 12:52:32	DE002	48	48	1	1	3FF0C0F5-1C9A-486B-97A4-10F46A2DF689.JPEG	2020-03-27 08:37:00	2020-03-27 08:37:00	2020-03-27 08:37:00	2020	3	27	1	1	B21B777E-5484-4B9C-B1E1-A2635D484DD6.JPEG	2020-03-27 08:38:00	2020-03-27 08:38:00	2020-03-27 08:38:00	2020	3	27
16	CP288	86	Prod	1105	81	2043	23	Klinikum der Universitat Munchen- Grosshadern	DE002	World	9488	Product change TP2	0	5852	APP_PRODUCTCHANGE_TP_2	Product change TP2	19		48475	Baseplate change TP 1	0		164611	12	2020-03-29 06:00:04	2020-03-29 06:00:04	2020-07-17 12:52:32	DE002	49	49	1	1	E7D45533-D8E5-441B-9B57-99BB310F9BB3.JPEG	2020-03-29 07:49:00	2020-03-29 07:49:00	2020-03-29 07:49:00	2020	3	29	1	1	5E7E9568-7420-48B2-991A-E6BEB5C78208.JPEG	2020-03-29 07:49:00	2020-03-29 07:49:00	2020-03-29 07:49:00	2020	3	29
16	CP288	86	Prod	1105	81	2043	23	Klinikum der Universitat Munchen- Grosshadern	DE002	World	9488	Product change TP2	0	5852	APP_PRODUCTCHANGE_TP_2	Product change TP2	19		48475	Baseplate change TP 1	0		164953	13	2020-03-31 07:00:16	2020-03-31 07:00:16	2020-07-17 12:52:32	DE002	50	50	1	1	7ED5C712-F4F7-4E35-9086-146A4AD34EB8.JPEG	2020-03-30 07:32:00	2020-03-30 07:32:00	2020-03-30 07:32:00	2020	3	30	1	1	91E35B4A-38A7-457E-B205-394AFB2229DB.JPEG	2020-03-30 07:32:00	2020-03-30 07:32:00	2020-03-30 07:32:00	2020	3	30
16	CP288	86	Prod	1105	81	2043	23	Klinikum der Universitat Munchen- Grosshadern	DE002	World	9488	Product change TP2	0	5852	APP_PRODUCTCHANGE_TP_2	Product change TP2	19		48475	Baseplate change TP 1	0		164956	14	2020-03-31 07:00:37	2020-03-31 07:00:37	2020-07-17 12:52:32	DE002	51	51	1	1	C82069AC-AD18-4945-98B1-EC0395025AD3.JPEG	2020-03-31 07:51:00	2020-03-31 07:51:00	2020-03-31 07:51:00	2020	3	31	1	1	52B8923E-65B3-463C-A2A4-F12D98679AF1.JPEG	2020-03-31 07:52:00	2020-03-31 07:52:00	2020-03-31 07:52:00	2020	3	31
16	CP288	86	Prod	1105	81	2043	23	Klinikum der Universitat Munchen- Grosshadern	DE002	World	9488	Product change TP2	0	5852	APP_PRODUCTCHANGE_TP_2	Product change TP2	19		48475	Baseplate change TP 1	0		168725	15	2020-04-05 06:00:08	2020-04-05 06:00:08	2020-07-17 12:52:32	DE002	52	52	1	1	A87C16C5-0B60-4B9B-99C8-0C4755D78D9A.JPEG	2020-04-01 07:48:00	2020-04-01 07:48:00	2020-04-01 07:48:00	2020	4	1	1	1	68893E16-D81F-41B6-8A4C-A50DB1E6B3CF.JPEG	2020-04-01 07:48:00	2020-04-01 07:48:00	2020-04-01 07:48:00	2020	4	1
16	CP288	86	Prod	1105	81	2043	23	Klinikum der Universitat Munchen- Grosshadern	DE002	World	9488	Product change TP2	0	5852	APP_PRODUCTCHANGE_TP_2	Product change TP2	19		48475	Baseplate change TP 1	0		168740	16	2020-04-05 07:00:15	2020-04-05 07:00:15	2020-07-17 12:52:32	DE002	53	53	1	1	6FD53342-C9D4-4AD8-9939-E8899C5C2AE7.JPEG	2020-04-02 08:37:00	2020-04-02 08:37:00	2020-04-02 08:37:00	2020	4	2	1	1	F9D5D288-90A1-4070-8777-EF71AD659639.JPEG	2020-04-02 08:37:00	2020-04-02 08:37:00	2020-04-02 08:37:00	2020	4	2
16	CP288	86	Prod	1105	81	2043	23	Klinikum der Universitat Munchen- Grosshadern	DE002	World	9488	Product change TP2	0	5852	APP_PRODUCTCHANGE_TP_2	Product change TP2	19		48475	Baseplate change TP 1	0		168743	17	2020-04-05 07:00:17	2020-04-05 07:00:17	2020-07-17 12:52:32	DE002	54	54	1	1	06231063-BD69-462F-8E89-0172E6FEA99C.JPEG	2020-04-04 07:42:00	2020-04-04 07:42:00	2020-04-04 07:42:00	2020	4	4	1	1	5E5F0253-AE0E-4ECB-B0EA-1275AF5F9D88.JPEG	2020-04-04 07:42:00	2020-04-04 07:42:00	2020-04-04 07:42:00	2020	4	4
16	CP288	86	Prod	1105	81	2043	23	Klinikum der Universitat Munchen- Grosshadern	DE002	World	9488	Product change TP2	0	5852	APP_PRODUCTCHANGE_TP_2	Product change TP2	19		48475	Baseplate change TP 1	0		168931	18	2020-04-07 07:00:17	2020-04-07 07:00:17	2020-07-17 12:52:32	DE002	55	55	1	1	596826BD-662D-4FCF-91E4-E8608063B08E.JPEG	2020-04-05 07:57:00	2020-04-05 07:57:00	2020-04-05 07:57:00	2020	4	5	1	1	8928F486-8C90-471A-8A6C-8680D8CE8CB1.JPEG	2020-04-05 07:58:00	2020-04-05 07:58:00	2020-04-05 07:58:00	2020	4	5
16	CP288	86	Prod	1105	81	2043	23	Klinikum der Universitat Munchen- Grosshadern	DE002	World	9488	Product change TP2	0	5852	APP_PRODUCTCHANGE_TP_2	Product change TP2	19		48475	Baseplate change TP 1	0		168934	19	2020-04-07 07:00:19	2020-04-07 07:00:19	2020-07-17 12:52:32	DE002	56	56	1	1	45AD0379-0955-4792-9145-1699C99B8BE7.JPEG	2020-04-07 08:22:00	2020-04-07 08:22:00	2020-04-07 08:22:00	2020	4	7	1	1	D9409673-3A2D-4E98-A4FF-F7DC5EC7B484.JPEG	2020-04-07 08:22:00	2020-04-07 08:22:00	2020-04-07 08:22:00	2020	4	7
16	CP288	86	Prod	1105	81	2043	23	Klinikum der Universitat Munchen- Grosshadern	DE002	World	9488	Product change TP2	0	5852	APP_PRODUCTCHANGE_TP_2	Product change TP2	19		48475	Baseplate change TP 1	0		169424	20	2020-04-11 07:00:09	2020-04-11 07:00:09	2020-07-17 12:52:32	DE002	57	57	1	1	7B35C7E5-7B79-4AB3-9975-36BB9A952BDC.JPEG	2020-04-08 09:01:00	2020-04-08 09:01:00	2020-04-08 09:01:00	2020	4	8	1	1	30D69AD8-2A79-4851-A065-58ECB5E922FF.JPEG	2020-04-08 09:02:00	2020-04-08 09:02:00	2020-04-08 09:02:00	2020	4	8
16	CP288	86	Prod	1105	81	2043	23	Klinikum der Universitat Munchen- Grosshadern	DE002	World	9488	Product change TP2	0	5852	APP_PRODUCTCHANGE_TP_2	Product change TP2	19		48475	Baseplate change TP 1	0		169427	21	2020-04-11 07:00:15	2020-04-11 07:00:15	2020-07-17 12:52:32	DE002	58	58	1	1	93103BD2-17D7-4032-92E3-21395B9C1E6F.JPEG	2020-04-09 09:58:00	2020-04-09 09:58:00	2020-04-09 09:58:00	2020	4	9	1	1	7BAA42B2-62BA-41BD-9527-10F99878FDEB.JPEG	2020-04-09 09:59:00	2020-04-09 09:59:00	2020-04-09 09:59:00	2020	4	9
16	CP288	86	Prod	1105	81	2043	23	Klinikum der Universitat Munchen- Grosshadern	DE002	World	9488	Product change TP2	0	5852	APP_PRODUCTCHANGE_TP_2	Product change TP2	19		48475	Baseplate change TP 1	0		169436	22	2020-04-11 09:00:04	2020-04-11 09:00:04	2020-07-17 12:52:32	DE002	59	59	1	1	30B17E0E-F7B2-4DCD-8CEB-6AB84BD43B6E.JPEG	2020-04-11 08:35:00	2020-04-11 08:35:00	2020-04-11 08:35:00	2020	4	11	1	1	D47887CF-9987-4D4D-A5A6-178B47AA4F76.JPEG	2020-04-11 08:35:00	2020-04-11 08:35:00	2020-04-11 08:35:00	2020	4	11
16	CP288	86	Prod	1105	81	2043	23	Klinikum der Universitat Munchen- Grosshadern	DE002	World	9488	Product change TP2	0	5852	APP_PRODUCTCHANGE_TP_2	Product change TP2	19		48475	Baseplate change TP 1	0		169439	23	2020-04-11 09:00:09	2020-04-11 09:00:09	2020-07-17 12:52:32	DE002	60	60	1	1	EB936328-3A3A-4148-A8F8-89C72BE84791.JPEG	2020-04-11 10:19:00	2020-04-11 10:19:00	2020-04-11 10:19:00	2020	4	11	1	1	C8027008-C26C-4DBA-A8E1-0521C210A89A.JPEG	2020-04-11 10:19:00	2020-04-11 10:19:00	2020-04-11 10:19:00	2020	4	11
16	CP288	86	Prod	1105	81	2043	23	Klinikum der Universitat Munchen- Grosshadern	DE002	World	9488	Product change TP2	0	5852	APP_PRODUCTCHANGE_TP_2	Product change TP2	19		48475	Baseplate change TP 1	0		170019	24	2020-04-15 07:00:07	2020-04-15 07:00:07	2020-07-17 12:52:32	DE002	62	62	1	1	4EDE57D7-EAAA-485B-85EF-E21B714EAE9F.JPEG	2020-04-15 08:14:00	2020-04-15 08:14:00	2020-04-15 08:14:00	2020	4	15	1	1	899A9707-74FE-43CD-946C-044DB0AB736D.JPEG	2020-04-15 08:14:00	2020-04-15 08:14:00	2020-04-15 08:14:00	2020	4	15
16	CP288	86	Prod	1105	81	2043	23	Klinikum der Universitat Munchen- Grosshadern	DE002	World	9488	Product change TP2	0	5852	APP_PRODUCTCHANGE_TP_2	Product change TP2	19		48475	Baseplate change TP 1	0		170687	25	2020-04-17 08:00:21	2020-04-17 08:00:21	2020-07-17 12:52:32	DE002	63	63	1	1	728F7822-9452-4E1D-812C-2BA93C682284.JPEG	2020-04-17 08:50:00	2020-04-17 08:50:00	2020-04-17 08:50:00	2020	4	17	1	1	68C1AA5E-7C6C-4DBD-990F-31E6F32B93AD.JPEG	2020-04-17 08:50:00	2020-04-17 08:50:00	2020-04-17 08:50:00	2020	4	17
16	CP288	86	Prod	1105	81	2043	23	Klinikum der Universitat Munchen- Grosshadern	DE002	World	9488	Product change TP2	0	5852	APP_PRODUCTCHANGE_TP_2	Product change TP2	19		48475	Baseplate change TP 1	0		171191	26	2020-04-19 07:00:04	2020-04-19 07:00:04	2020-07-17 12:52:32	DE002	64	64	1	1	2C483454-B16A-4236-9FFD-EAE17F76E1D3.JPEG	2020-04-19 08:53:00	2020-04-19 08:53:00	2020-04-19 08:53:00	2020	4	19	1	1	A9D07BDC-AB99-47C7-BA59-AB91CD3802AC.JPEG	2020-04-19 08:53:00	2020-04-19 08:53:00	2020-04-19 08:53:00	2020	4	19
16	CP288	86	Prod	1105	81	2043	23	Klinikum der Universitat Munchen- Grosshadern	DE002	World	9488	Product change TP2	0	5852	APP_PRODUCTCHANGE_TP_2	Product change TP2	19		48475	Baseplate change TP 1	0		171380	27	2020-04-21 06:00:11	2020-04-21 06:00:11	2020-07-17 12:52:32	DE002	65	65	1	1	A08EA9AF-5040-4CB3-94DA-4A6D500176FF.JPEG	2020-04-21 07:25:00	2020-04-21 07:25:00	2020-04-21 07:25:00	2020	4	21	1	1	C3BF28E1-CC83-499E-ACC6-4627EC456D35.JPEG	2020-04-21 07:26:00	2020-04-21 07:26:00	2020-04-21 07:26:00	2020	4	21
16	CP288	86	Prod	1105	81	2043	23	Klinikum der Universitat Munchen- Grosshadern	DE002	World	9488	Product change TP2	0	5852	APP_PRODUCTCHANGE_TP_2	Product change TP2	19		48475	Baseplate change TP 1	0		172173	28	2020-04-23 08:00:06	2020-04-23 08:00:06	2020-07-17 12:52:32	DE002	66	66	1	1	F933FB11-F226-4652-9692-05E5E776CA86.JPEG	2020-04-23 08:55:00	2020-04-23 08:55:00	2020-04-23 08:55:00	2020	4	23	1	1	5759F3DD-0E1D-4CCB-8DDF-93BBC31E6649.JPEG	2020-04-23 08:55:00	2020-04-23 08:55:00	2020-04-23 08:55:00	2020	4	23
16	CP288	86	Prod	1106	81	2044	23	Klinikum der Universitat Munchen- Grosshadern	DE002	World	9516	Product change TP1	0	5849	APP_PRODUCTCHANGE_TP_1	Product change TP1	17		48534	Baseplate change TP 1	0		132068	1	2020-02-06 16:00:07	2020-02-06 16:00:07	2020-07-17 12:52:32	DE002	0	0	1	1	C1203105-EB1D-4755-8779-EEAA7369ECD5.JPEG	2020-02-06 16:26:00	2020-02-06 16:26:00	2020-02-06 16:26:00	2020	2	6	1	1	4BEAFC47-4255-42BE-AF42-BAA7C7BFE699.JPEG	2020-02-06 16:26:00	2020-02-06 16:26:00	2020-02-06 16:26:00	2020	2	6
16	CP288	86	Prod	1106	81	2044	23	Klinikum der Universitat Munchen- Grosshadern	DE002	World	9519	Product change TP2	0	5852	APP_PRODUCTCHANGE_TP_2	Product change TP2	19		48535	Baseplate change TP 1	0		132070	1	2020-03-23 09:00:05	2020-03-23 09:00:05	2020-07-17 12:52:32	DE002	43	43	1	1	1ADDFC24-9DAD-4623-8FAB-BD347B839F85.JPEG	2020-03-23 09:49:00	2020-03-23 09:49:00	2020-03-23 09:49:00	2020	3	23	1	1	B239917F-FC0B-4102-A7CA-E0F404BDC639.JPEG	2020-03-23 09:49:00	2020-03-23 09:49:00	2020-03-23 09:49:00	2020	3	23
16	CP288	86	Prod	1106	81	2044	23	Klinikum der Universitat Munchen- Grosshadern	DE002	World	9516	Product change TP1	0	5849	APP_PRODUCTCHANGE_TP_1	Product change TP1	17		48534	Baseplate change TP 1	0		145963	2	2020-02-07 08:00:05	2020-02-07 08:00:05	2020-07-17 12:52:32	DE002	1	1	1	1	B6A523F2-6BB9-44ED-9A8A-3B3728FFC2AC.JPEG	2020-02-07 08:01:00	2020-02-07 08:01:00	2020-02-07 08:01:00	2020	2	7	1	1	32D69096-C1E1-4E04-A2D5-F2DBDF6A601B.JPEG	2020-02-07 08:02:00	2020-02-07 08:02:00	2020-02-07 08:02:00	2020	2	7
16	CP288	86	Prod	1106	81	2044	23	Klinikum der Universitat Munchen- Grosshadern	DE002	World	9516	Product change TP1	0	5849	APP_PRODUCTCHANGE_TP_1	Product change TP1	17		48534	Baseplate change TP 1	0		146033	3	2020-02-09 05:00:12	2020-02-09 05:00:12	2020-07-17 12:52:32	DE002	3	3	1	1	8B5C00EA-007C-45F9-97D8-5E644A41C48B.JPEG	2020-02-09 05:15:00	2020-02-09 05:15:00	2020-02-09 05:15:00	2020	2	9	1	1	D6EB2EC7-AB85-4D7A-B600-61B7C47D9BD6.JPEG	2020-02-09 05:15:00	2020-02-09 05:15:00	2020-02-09 05:15:00	2020	2	9
16	CP288	86	Prod	1106	81	2044	23	Klinikum der Universitat Munchen- Grosshadern	DE002	World	9516	Product change TP1	0	5849	APP_PRODUCTCHANGE_TP_1	Product change TP1	17		48534	Baseplate change TP 1	0		146074	4	2020-02-10 12:00:25	2020-02-10 12:00:25	2020-07-17 12:52:32	DE002	4	4	1	1	5572E389-0E40-4AC4-A16D-9D6A01A297EF.JPEG	2020-02-10 08:02:00	2020-02-10 08:02:00	2020-02-10 08:02:00	2020	2	10	1	1	7D9982FB-6F08-41A1-AF8D-23DAADB5C7F3.JPEG	2020-02-10 08:02:00	2020-02-10 08:02:00	2020-02-10 08:02:00	2020	2	10
16	CP288	86	Prod	1106	81	2044	23	Klinikum der Universitat Munchen- Grosshadern	DE002	World	9516	Product change TP1	0	5849	APP_PRODUCTCHANGE_TP_1	Product change TP1	17		48534	Baseplate change TP 1	0		146101	5	2020-02-11 01:00:05	2020-02-11 01:00:05	2020-07-17 12:52:32	DE002	5	5	1	1	60C61CC0-A667-404D-B775-E4548227F6AC.JPEG	2020-02-10 12:16:00	2020-02-10 12:16:00	2020-02-10 12:16:00	2020	2	10	1	1	53837F13-E49A-4774-9CCF-FE004A5F457F.JPEG	2020-02-10 12:16:00	2020-02-10 12:16:00	2020-02-10 12:16:00	2020	2	10
16	CP288	86	Prod	1106	81	2044	23	Klinikum der Universitat Munchen- Grosshadern	DE002	World	9516	Product change TP1	0	5849	APP_PRODUCTCHANGE_TP_1	Product change TP1	17		48534	Baseplate change TP 1	0		146104	6	2020-02-11 01:00:13	2020-02-11 01:00:13	2020-07-17 12:52:32	DE002	6	6	1	1	235BF4C1-02E0-41EE-A5D5-F0DAEEFF283A.JPEG	2020-02-11 01:19:00	2020-02-11 01:19:00	2020-02-11 01:19:00	2020	2	11	1	1	543219A5-7A85-45B8-AFBF-988D23074940.JPEG	2020-02-11 01:20:00	2020-02-11 01:20:00	2020-02-11 01:20:00	2020	2	11
16	CP288	86	Prod	1106	81	2044	23	Klinikum der Universitat Munchen- Grosshadern	DE002	World	9516	Product change TP1	0	5849	APP_PRODUCTCHANGE_TP_1	Product change TP1	17		48534	Baseplate change TP 1	0		146128	7	2020-02-11 13:00:07	2020-02-11 13:00:07	2020-07-17 12:52:32	DE002	7	7	1	1	64F8CDB8-018C-4B57-A375-5A9CD7AACFFF.JPEG	2020-02-11 09:23:00	2020-02-11 09:23:00	2020-02-11 09:23:00	2020	2	11	1	1	E0F33400-4E97-4C2A-9B2B-B60A71ED3CAA.JPEG	2020-02-11 09:24:00	2020-02-11 09:24:00	2020-02-11 09:24:00	2020	2	11
16	CP288	86	Prod	1106	81	2044	23	Klinikum der Universitat Munchen- Grosshadern	DE002	World	9516	Product change TP1	0	5849	APP_PRODUCTCHANGE_TP_1	Product change TP1	17		48534	Baseplate change TP 1	0		146131	8	2020-02-11 13:00:14	2020-02-11 13:00:14	2020-07-17 12:52:32	DE002	8	8	1	1	C2D8C21A-15F2-41DE-950C-46D8F0CA1CE8.JPEG	2020-02-11 12:53:00	2020-02-11 12:53:00	2020-02-11 12:53:00	2020	2	11	1	1	94C29800-288E-404C-B306-4BFD27421557.JPEG	2020-02-11 12:54:00	2020-02-11 12:54:00	2020-02-11 12:54:00	2020	2	11
16	CP288	86	Prod	1106	81	2044	23	Klinikum der Universitat Munchen- Grosshadern	DE002	World	9516	Product change TP1	0	5849	APP_PRODUCTCHANGE_TP_1	Product change TP1	17		48534	Baseplate change TP 1	0		146512	9	2020-02-15 13:00:06	2020-02-15 13:00:06	2020-07-17 12:52:32	DE002	10	10	1	1	8F8F44FA-2D16-42EB-81ED-23697B718569.JPEG	2020-02-14 15:12:00	2020-02-14 15:12:00	2020-02-14 15:12:00	2020	2	14	1	1	938625F0-03C4-48AA-9789-8A77F6542A01.JPEG	2020-02-14 15:13:00	2020-02-14 15:13:00	2020-02-14 15:13:00	2020	2	14
16	CP288	86	Prod	1106	81	2044	23	Klinikum der Universitat Munchen- Grosshadern	DE002	World	9516	Product change TP1	0	5849	APP_PRODUCTCHANGE_TP_1	Product change TP1	17		48534	Baseplate change TP 1	0		146817	10	2020-02-18 02:00:11	2020-02-18 02:00:11	2020-07-17 12:52:32	DE002	11	11	1	1	D4565FF8-FF1E-4DD2-9FE5-1FC20EE15503.JPEG	2020-02-15 13:29:00	2020-02-15 13:29:00	2020-02-15 13:29:00	2020	2	15	1	1	D15BB563-2EEB-49C8-9838-E74D1C560B3C.JPEG	2020-02-15 13:29:00	2020-02-15 13:29:00	2020-02-15 13:29:00	2020	2	15
16	CP288	86	Prod	1106	81	2044	23	Klinikum der Universitat Munchen- Grosshadern	DE002	World	9516	Product change TP1	0	5849	APP_PRODUCTCHANGE_TP_1	Product change TP1	17		48534	Baseplate change TP 1	0		146820	11	2020-02-18 02:00:21	2020-02-18 02:00:21	2020-07-17 12:52:32	DE002	12	12	1	1	5E538D77-51E2-4114-A57F-8C4ABDAD838B.JPEG	2020-02-18 02:28:00	2020-02-18 02:28:00	2020-02-18 02:28:00	2020	2	18	1	1	5AF2F186-2B69-4013-8D47-635A8EB540A1.JPEG	2020-02-18 02:28:00	2020-02-18 02:28:00	2020-02-18 02:28:00	2020	2	18
16	CP288	86	Prod	1106	81	2044	23	Klinikum der Universitat Munchen- Grosshadern	DE002	World	9516	Product change TP1	0	5849	APP_PRODUCTCHANGE_TP_1	Product change TP1	17		48534	Baseplate change TP 1	0		152537	12	2020-02-20 15:00:02	2020-02-20 15:00:02	2020-07-17 12:52:32	DE002	13	13	1	1	37ED93C8-ADDD-4F6E-B31D-855D0F379FA8.JPEG	2020-02-19 15:03:00	2020-02-19 15:03:00	2020-02-19 15:03:00	2020	2	19	1	1	F0D056FA-88D1-48C7-B8B3-5079DCFB3211.JPEG	2020-02-19 15:04:00	2020-02-19 15:04:00	2020-02-19 15:04:00	2020	2	19
16	CP288	86	Prod	1106	81	2044	23	Klinikum der Universitat Munchen- Grosshadern	DE002	World	9516	Product change TP1	0	5849	APP_PRODUCTCHANGE_TP_1	Product change TP1	17		48534	Baseplate change TP 1	0		152783	13	2020-02-22 18:00:06	2020-02-22 18:00:06	2020-07-17 12:52:32	DE002	14	14	1	1	6AE6ACFC-B7E4-45D9-9CD7-9DD408538B10.JPEG	2020-02-20 17:28:00	2020-02-20 17:28:00	2020-02-20 17:28:00	2020	2	20	1	1	37BAA523-BB76-42DC-88F5-3F85FCDD83BF.JPEG	2020-02-20 17:29:00	2020-02-20 17:29:00	2020-02-20 17:29:00	2020	2	20
16	CP288	86	Prod	1106	81	2044	23	Klinikum der Universitat Munchen- Grosshadern	DE002	World	9516	Product change TP1	0	5849	APP_PRODUCTCHANGE_TP_1	Product change TP1	17		48534	Baseplate change TP 1	0		153140	14	2020-02-24 13:00:22	2020-02-24 13:00:22	2020-07-17 12:52:32	DE002	17	17	1	1	2D66FE57-D1A0-45F1-A20D-D008A41B22D3.JPEG	2020-02-24 13:41:00	2020-02-24 13:41:00	2020-02-24 13:41:00	2020	2	24	1	1	6A76C4AD-1A64-4598-801B-D9526279765B.JPEG	2020-02-24 13:42:00	2020-02-24 13:42:00	2020-02-24 13:42:00	2020	2	24
16	CP288	86	Prod	1106	81	2044	23	Klinikum der Universitat Munchen- Grosshadern	DE002	World	9516	Product change TP1	0	5849	APP_PRODUCTCHANGE_TP_1	Product change TP1	17		48534	Baseplate change TP 1	0		154745	15	2020-02-28 14:00:06	2020-02-28 14:00:06	2020-07-17 12:52:32	DE002	18	18	1	1	36405C23-D447-40F6-9368-86849A78EBD4.JPEG	2020-02-26 18:44:00	2020-02-26 18:44:00	2020-02-26 18:44:00	2020	2	26	1	1	B773441D-2F96-4164-8F8B-9570A94648FF.JPEG	2020-02-26 18:44:00	2020-02-26 18:44:00	2020-02-26 18:44:00	2020	2	26
16	CP288	86	Prod	1106	81	2044	23	Klinikum der Universitat Munchen- Grosshadern	DE002	World	9516	Product change TP1	0	5849	APP_PRODUCTCHANGE_TP_1	Product change TP1	17		48534	Baseplate change TP 1	0		154871	16	2020-03-01 08:00:17	2020-03-01 08:00:17	2020-07-17 12:52:32	DE002	19	19	1	1	1DEC40D6-7BED-4DB8-9BB1-389241D7D49A.JPEG	2020-02-28 14:31:00	2020-02-28 14:31:00	2020-02-28 14:31:00	2020	2	28	1	1	A3782BAA-F872-4F23-90ED-8EBA4FFEDEB4.JPEG	2020-02-28 14:31:00	2020-02-28 14:31:00	2020-02-28 14:31:00	2020	2	28
16	CP288	86	Prod	1106	81	2044	23	Klinikum der Universitat Munchen- Grosshadern	DE002	World	9516	Product change TP1	0	5849	APP_PRODUCTCHANGE_TP_1	Product change TP1	17		48534	Baseplate change TP 1	0		154874	17	2020-03-01 08:00:20	2020-03-01 08:00:20	2020-07-17 12:52:32	DE002	21	21	1	1	DC5E7D3A-71C9-41A3-9CE3-392FA540BE14.JPEG	2020-03-01 08:33:00	2020-03-01 08:33:00	2020-03-01 08:33:00	2020	3	1	1	1	A4A7B9AE-0136-46DC-850F-A249BB69B6BE.JPEG	2020-03-01 08:33:00	2020-03-01 08:33:00	2020-03-01 08:33:00	2020	3	1
16	CP288	86	Prod	1106	81	2044	23	Klinikum der Universitat Munchen- Grosshadern	DE002	World	9516	Product change TP1	0	5849	APP_PRODUCTCHANGE_TP_1	Product change TP1	17		48534	Baseplate change TP 1	0		157831	18	2020-03-05 09:00:08	2020-03-05 09:00:08	2020-07-17 12:52:32	DE002	22	22	1	1	F2CF8DEA-A924-4BA6-BBB6-0B950E617357.JPEG	2020-03-03 08:38:00	2020-03-03 08:38:00	2020-03-03 08:38:00	2020	3	3	1	1	AAACAA13-1952-4704-8BED-B0EA87426FF7.JPEG	2020-03-03 08:38:00	2020-03-03 08:38:00	2020-03-03 08:38:00	2020	3	3
16	CP288	86	Prod	1106	81	2044	23	Klinikum der Universitat Munchen- Grosshadern	DE002	World	9516	Product change TP1	0	5849	APP_PRODUCTCHANGE_TP_1	Product change TP1	17		48534	Baseplate change TP 1	0		157834	19	2020-03-05 10:00:13	2020-03-05 10:00:13	2020-07-17 12:52:32	DE002	24	24	1	1	11355918-5A83-4CFC-9BEC-FA8963CC0090.JPEG	2020-03-05 09:53:00	2020-03-05 09:53:00	2020-03-05 09:53:00	2020	3	5	1	1	47995BFE-F75E-439B-8EAB-DDED57469796.JPEG	2020-03-05 09:53:00	2020-03-05 09:53:00	2020-03-05 09:53:00	2020	3	5
16	CP288	86	Prod	1106	81	2044	23	Klinikum der Universitat Munchen- Grosshadern	DE002	World	9516	Product change TP1	0	5849	APP_PRODUCTCHANGE_TP_1	Product change TP1	17		48534	Baseplate change TP 1	0		158073	20	2020-03-08 15:00:12	2020-03-08 15:00:12	2020-07-17 12:52:32	DE002	25	25	1	1	6C96DEDA-F46C-48EA-9313-4769D5F23542.JPEG	2020-03-07 08:09:00	2020-03-07 08:09:00	2020-03-07 08:09:00	2020	3	7	1	1	9E02705B-11C9-4FFE-BD90-AD24D6D87116.JPEG	2020-03-07 08:09:00	2020-03-07 08:09:00	2020-03-07 08:09:00	2020	3	7
16	CP288	86	Prod	1106	81	2044	23	Klinikum der Universitat Munchen- Grosshadern	DE002	World	9516	Product change TP1	0	5849	APP_PRODUCTCHANGE_TP_1	Product change TP1	17		48534	Baseplate change TP 1	0		158076	21	2020-03-08 15:00:25	2020-03-08 15:00:25	2020-07-17 12:52:32	DE002	26	26	1	1	3842E781-AF1C-42FE-B55E-F1FDA8AFB21B.JPEG	2020-03-08 15:48:00	2020-03-08 15:48:00	2020-03-08 15:48:00	2020	3	8	1	1	2CBD4B9F-D919-469F-9D4F-ADE7082A0ACC.JPEG	2020-03-08 15:48:00	2020-03-08 15:48:00	2020-03-08 15:48:00	2020	3	8
16	CP288	86	Prod	1106	81	2044	23	Klinikum der Universitat Munchen- Grosshadern	DE002	World	9516	Product change TP1	0	5849	APP_PRODUCTCHANGE_TP_1	Product change TP1	17		48534	Baseplate change TP 1	0		158642	22	2020-03-12 15:00:08	2020-03-12 15:00:08	2020-07-17 12:52:32	DE002	27	27	1	1	A7723217-C9D1-48A4-8B14-984BECCF0AD3.JPEG	2020-03-08 17:24:00	2020-03-08 17:24:00	2020-03-08 17:24:00	2020	3	8	1	1	F9AB665F-333B-48DE-AC75-E815E20CDE55.JPEG	2020-03-08 17:24:00	2020-03-08 17:24:00	2020-03-08 17:24:00	2020	3	8
16	CP288	86	Prod	1106	81	2044	23	Klinikum der Universitat Munchen- Grosshadern	DE002	World	9516	Product change TP1	0	5849	APP_PRODUCTCHANGE_TP_1	Product change TP1	17		48534	Baseplate change TP 1	0		158645	23	2020-03-12 15:00:16	2020-03-12 15:00:16	2020-07-17 12:52:32	DE002	29	29	1	1	89919E47-9DA3-4663-A1AB-D37691FD3028.JPEG	2020-03-10 23:40:00	2020-03-10 23:40:00	2020-03-10 23:40:00	2020	3	10	1	1	BB3E0E46-0FBE-44FA-9C3A-72336580EFD7.JPEG	2020-03-10 23:40:00	2020-03-10 23:40:00	2020-03-10 23:40:00	2020	3	10
16	CP288	86	Prod	1106	81	2044	23	Klinikum der Universitat Munchen- Grosshadern	DE002	World	9516	Product change TP1	0	5849	APP_PRODUCTCHANGE_TP_1	Product change TP1	17		48534	Baseplate change TP 1	0		158876	24	2020-03-14 07:00:11	2020-03-14 07:00:11	2020-07-17 12:52:32	DE002	30	30	1	1	F24938FC-A9F6-4AEE-810C-94A6FD0D4B53.JPEG	2020-03-12 15:08:00	2020-03-12 15:08:00	2020-03-12 15:08:00	2020	3	12	1	1	C8B7B57A-6B13-417A-9FDD-965734F4846A.JPEG	2020-03-12 15:08:00	2020-03-12 15:08:00	2020-03-12 15:08:00	2020	3	12
16	CP288	86	Prod	1106	81	2044	23	Klinikum der Universitat Munchen- Grosshadern	DE002	World	9516	Product change TP1	0	5849	APP_PRODUCTCHANGE_TP_1	Product change TP1	17		48534	Baseplate change TP 1	0		159311	25	2020-03-16 05:00:31	2020-03-16 05:00:31	2020-07-17 12:52:32	DE002	31	31	1	1	62BEDBDD-0C16-49F6-ACC5-04D27D3E0120.JPEG	2020-03-14 07:15:00	2020-03-14 07:15:00	2020-03-14 07:15:00	2020	3	14	1	1	88FAAD09-E8BD-46A5-9A95-C260867C38A2.JPEG	2020-03-14 07:16:00	2020-03-14 07:16:00	2020-03-14 07:16:00	2020	3	14
16	CP288	86	Prod	1106	81	2044	23	Klinikum der Universitat Munchen- Grosshadern	DE002	World	9516	Product change TP1	0	5849	APP_PRODUCTCHANGE_TP_1	Product change TP1	17		48534	Baseplate change TP 1	0		160034	26	2020-03-17 07:00:06	2020-03-17 07:00:06	2020-07-17 12:52:32	DE002	32	32	1	1	179EDBB2-74FD-4FA0-BF9A-8C98692697B9.JPEG	2020-03-16 05:30:00	2020-03-16 05:30:00	2020-03-16 05:30:00	2020	3	16	1	1	67A8C30B-022A-4EEB-9B86-71767129D57B.JPEG	2020-03-16 05:30:00	2020-03-16 05:30:00	2020-03-16 05:30:00	2020	3	16
16	CP288	86	Prod	1106	81	2044	23	Klinikum der Universitat Munchen- Grosshadern	DE002	World	9516	Product change TP1	0	5849	APP_PRODUCTCHANGE_TP_1	Product change TP1	17		48534	Baseplate change TP 1	0		160037	27	2020-03-17 07:00:09	2020-03-17 07:00:09	2020-07-17 12:52:32	DE002	33	33	1	1	FEFB0595-48A4-44AC-B78E-8995E039795E.JPEG	2020-03-16 08:55:00	2020-03-16 08:55:00	2020-03-16 08:55:00	2020	3	16	1	1	61ACC790-D05D-4ACF-A2C6-29C34B103D3E.JPEG	2020-03-16 08:55:00	2020-03-16 08:55:00	2020-03-16 08:55:00	2020	3	16
16	CP288	86	Prod	1106	81	2044	23	Klinikum der Universitat Munchen- Grosshadern	DE002	World	9516	Product change TP1	0	5849	APP_PRODUCTCHANGE_TP_1	Product change TP1	17		48534	Baseplate change TP 1	0		161745	28	2020-03-19 09:00:10	2020-03-19 09:00:10	2020-07-17 12:52:32	DE002	34	34	1	1	DD915345-6114-4DFC-A66D-8BD519BE0F80.JPEG	2020-03-17 07:56:00	2020-03-17 07:56:00	2020-03-17 07:56:00	2020	3	17	1	1	CD6F6E22-BA41-426C-96CB-CD7ACFEA62B4.JPEG	2020-03-17 07:56:00	2020-03-17 07:56:00	2020-03-17 07:56:00	2020	3	17
16	CP288	86	Prod	1106	81	2044	23	Klinikum der Universitat Munchen- Grosshadern	DE002	World	9516	Product change TP1	0	5849	APP_PRODUCTCHANGE_TP_1	Product change TP1	17		48534	Baseplate change TP 1	0		161748	29	2020-03-19 09:00:13	2020-03-19 09:00:13	2020-07-17 12:52:32	DE002	35	35	1	1	A9AE20D9-921E-4A64-A450-0C1077CCA737.JPEG	2020-03-17 18:03:00	2020-03-17 18:03:00	2020-03-17 18:03:00	2020	3	17	1	1	A878D44D-D01C-4A73-B296-0A45EADB2475.JPEG	2020-03-17 18:03:00	2020-03-17 18:03:00	2020-03-17 18:03:00	2020	3	17
16	CP288	86	Prod	1106	81	2044	23	Klinikum der Universitat Munchen- Grosshadern	DE002	World	9516	Product change TP1	0	5849	APP_PRODUCTCHANGE_TP_1	Product change TP1	17		48534	Baseplate change TP 1	0		161751	30	2020-03-19 09:00:17	2020-03-19 09:00:17	2020-07-17 12:52:32	DE002	37	37	1	1	81D96144-D2B5-4AC9-BAA4-7234CDAAF6E2.JPEG	2020-03-19 09:06:00	2020-03-19 09:06:00	2020-03-19 09:06:00	2020	3	19	1	1	9DD491B7-8D3F-49D9-AB33-567FA2A5CB7B.JPEG	2020-03-19 09:06:00	2020-03-19 09:06:00	2020-03-19 09:06:00	2020	3	19
16	CP288	86	Prod	1106	81	2044	23	Klinikum der Universitat Munchen- Grosshadern	DE002	World	9516	Product change TP1	0	5849	APP_PRODUCTCHANGE_TP_1	Product change TP1	17		48534	Baseplate change TP 1	0		162261	31	2020-03-20 08:00:07	2020-03-20 08:00:07	2020-07-17 12:52:32	DE002	38	38	1	1	60F32A58-07C5-47DE-96E3-47E4BA61A98E.JPEG	2020-03-20 08:47:00	2020-03-20 08:47:00	2020-03-20 08:47:00	2020	3	20	1	1	F5A46364-2C85-490F-A5C8-FC01EFBEEF26.JPEG	2020-03-20 08:47:00	2020-03-20 08:47:00	2020-03-20 08:47:00	2020	3	20
16	CP288	86	Prod	1106	81	2044	23	Klinikum der Universitat Munchen- Grosshadern	DE002	World	9516	Product change TP1	0	5849	APP_PRODUCTCHANGE_TP_1	Product change TP1	17		48534	Baseplate change TP 1	0		162706	32	2020-03-21 08:00:08	2020-03-21 08:00:08	2020-07-17 12:52:32	DE002	39	39	1	1	3B15E8A4-F9D3-404C-B2BE-A4929E3ED97F.JPEG	2020-03-20 09:10:00	2020-03-20 09:10:00	2020-03-20 09:10:00	2020	3	20	1	1	8E554A2C-EA50-4C0B-9987-95F120976AC3.JPEG	2020-03-20 09:10:00	2020-03-20 09:10:00	2020-03-20 09:10:00	2020	3	20
16	CP288	86	Prod	1106	81	2044	23	Klinikum der Universitat Munchen- Grosshadern	DE002	World	9516	Product change TP1	0	5849	APP_PRODUCTCHANGE_TP_1	Product change TP1	17		48534	Baseplate change TP 1	0		162717	33	2020-03-21 09:00:08	2020-03-21 09:00:08	2020-07-17 12:52:32	DE002	40	40	1	1	89C5B171-85FE-4613-AB4C-F36BDD7C4277.JPEG	2020-03-21 08:56:00	2020-03-21 08:56:00	2020-03-21 08:56:00	2020	3	21	1	1	33010819-C7A2-4771-A400-38D2442B8735.JPEG	2020-03-21 08:56:00	2020-03-21 08:56:00	2020-03-21 08:56:00	2020	3	21
16	CP288	86	Prod	1106	81	2044	23	Klinikum der Universitat Munchen- Grosshadern	DE002	World	9519	Product change TP2	0	5852	APP_PRODUCTCHANGE_TP_2	Product change TP2	19		48535	Baseplate change TP 1	0		163731	2	2020-03-25 16:00:04	2020-03-25 16:00:04	2020-07-17 12:52:32	DE002	44	44	1	1	86AD110B-163F-4B44-A98A-881C573C3940.JPEG	2020-03-25 16:19:00	2020-03-25 16:19:00	2020-03-25 16:19:00	2020	3	25	1	1	294D29ED-394F-4BE7-9A73-3BE702F13203.JPEG	2020-03-25 16:19:00	2020-03-25 16:19:00	2020-03-25 16:19:00	2020	3	25
16	CP288	86	Prod	1106	81	2044	23	Klinikum der Universitat Munchen- Grosshadern	DE002	World	9519	Product change TP2	0	5852	APP_PRODUCTCHANGE_TP_2	Product change TP2	19		48535	Baseplate change TP 1	0		164959	3	2020-03-31 07:00:44	2020-03-31 07:00:44	2020-07-17 12:52:32	DE002	45	45	1	1	412250CE-DEC8-49F6-9DCC-FCBB2D4B0C4D.JPEG	2020-03-26 08:40:00	2020-03-26 08:40:00	2020-03-26 08:40:00	2020	3	26	1	1	CF78F03C-F579-4DB2-B742-D210CA1740D0.JPEG	2020-03-26 08:40:00	2020-03-26 08:40:00	2020-03-26 08:40:00	2020	3	26
16	CP288	86	Prod	1106	81	2044	23	Klinikum der Universitat Munchen- Grosshadern	DE002	World	9519	Product change TP2	0	5852	APP_PRODUCTCHANGE_TP_2	Product change TP2	19		48535	Baseplate change TP 1	0		164962	4	2020-03-31 07:00:51	2020-03-31 07:00:51	2020-07-17 12:52:32	DE002	46	46	1	1	B184A099-5844-4FEA-87E8-BCF4437A4B6A.JPEG	2020-03-27 08:17:00	2020-03-27 08:17:00	2020-03-27 08:17:00	2020	3	27	1	1	97280B01-6E4B-44A1-8145-BD5D33EEE373.JPEG	2020-03-27 08:18:00	2020-03-27 08:18:00	2020-03-27 08:18:00	2020	3	27
16	CP288	86	Prod	1106	81	2044	23	Klinikum der Universitat Munchen- Grosshadern	DE002	World	9519	Product change TP2	0	5852	APP_PRODUCTCHANGE_TP_2	Product change TP2	19		48535	Baseplate change TP 1	0		164965	5	2020-03-31 07:00:54	2020-03-31 07:00:54	2020-07-17 12:52:32	DE002	47	47	1	1	B830E49C-7E4A-4D5E-9E89-4BE22A850F2B.JPEG	2020-03-29 08:40:00	2020-03-29 08:40:00	2020-03-29 08:40:00	2020	3	29	1	1	659FD215-0B75-447E-AAAB-E44DE5F0F2F2.JPEG	2020-03-29 08:41:00	2020-03-29 08:41:00	2020-03-29 08:41:00	2020	3	29
16	CP288	86	Prod	1106	81	2044	23	Klinikum der Universitat Munchen- Grosshadern	DE002	World	9519	Product change TP2	0	5852	APP_PRODUCTCHANGE_TP_2	Product change TP2	19		48535	Baseplate change TP 1	0		164968	6	2020-03-31 07:01:00	2020-03-31 07:01:00	2020-07-17 12:52:32	DE002	48	48	1	1	C66D98AC-E04B-4909-ABA9-8E8A9251EBBD.JPEG	2020-03-31 08:28:00	2020-03-31 08:28:00	2020-03-31 08:28:00	2020	3	31	1	1	88988D53-FC6E-432A-BDE4-A0A29C8759E4.JPEG	2020-03-31 08:29:00	2020-03-31 08:29:00	2020-03-31 08:29:00	2020	3	31
16	CP288	86	Prod	1106	81	2044	23	Klinikum der Universitat Munchen- Grosshadern	DE002	World	9519	Product change TP2	0	5852	APP_PRODUCTCHANGE_TP_2	Product change TP2	19		48535	Baseplate change TP 1	0		168376	7	2020-04-02 06:00:27	2020-04-02 06:00:27	2020-07-17 12:52:32	DE002	49	49	1	1	C53D3180-C732-411A-A98B-B49F33E81290.JPEG	2020-04-02 07:04:00	2020-04-02 07:04:00	2020-04-02 07:04:00	2020	4	2	1	1	84F22B8C-0CF2-4EA2-95E9-B5A98BA92440.JPEG	2020-04-02 07:04:00	2020-04-02 07:04:00	2020-04-02 07:04:00	2020	4	2
16	CP288	86	Prod	1106	81	2044	23	Klinikum der Universitat Munchen- Grosshadern	DE002	World	9519	Product change TP2	0	5852	APP_PRODUCTCHANGE_TP_2	Product change TP2	19		48535	Baseplate change TP 1	0		169215	8	2020-04-08 07:00:24	2020-04-08 07:00:24	2020-07-17 12:52:32	DE002	50	50	1	1	2F6AD7FA-93C7-43DB-BE72-6C19427156E8.JPEG	2020-04-04 07:21:00	2020-04-04 07:21:00	2020-04-04 07:21:00	2020	4	4	1	1	7616A503-08EA-46BF-93EB-129A6025BC0B.JPEG	2020-04-04 07:21:00	2020-04-04 07:21:00	2020-04-04 07:21:00	2020	4	4
16	CP288	86	Prod	1106	81	2044	23	Klinikum der Universitat Munchen- Grosshadern	DE002	World	9519	Product change TP2	0	5852	APP_PRODUCTCHANGE_TP_2	Product change TP2	19		48535	Baseplate change TP 1	0		169218	9	2020-04-08 08:00:03	2020-04-08 08:00:03	2020-07-17 12:52:32	DE002	51	51	1	1	2A899881-41D1-47DC-90AE-7B17598A32CF.JPEG	2020-04-06 06:51:00	2020-04-06 06:51:00	2020-04-06 06:51:00	2020	4	6	1	1	29551AA6-9E90-414A-8BC7-F37A41D12FCD.JPEG	2020-04-06 06:51:00	2020-04-06 06:51:00	2020-04-06 06:51:00	2020	4	6
16	CP288	86	Prod	1106	81	2044	23	Klinikum der Universitat Munchen- Grosshadern	DE002	World	9519	Product change TP2	0	5852	APP_PRODUCTCHANGE_TP_2	Product change TP2	19		48535	Baseplate change TP 1	0		169361	10	2020-04-10 06:00:05	2020-04-10 06:00:05	2020-07-17 12:52:32	DE002	52	52	1	1	1253530A-4663-4A27-89DC-594BE537EEF3.JPEG	2020-04-08 07:41:00	2020-04-08 07:41:00	2020-04-08 07:41:00	2020	4	8	1	1	7E004D6E-8A2E-4D70-A8A5-54A100187FA3.JPEG	2020-04-08 07:41:00	2020-04-08 07:41:00	2020-04-08 07:41:00	2020	4	8
16	CP288	86	Prod	1106	81	2044	23	Klinikum der Universitat Munchen- Grosshadern	DE002	World	9519	Product change TP2	0	5852	APP_PRODUCTCHANGE_TP_2	Product change TP2	19		48535	Baseplate change TP 1	0		169505	11	2020-04-12 07:00:05	2020-04-12 07:00:05	2020-07-17 12:52:32	DE002	53	53	1	1	C100BD02-836B-4936-84E7-A086C3C36552.JPEG	2020-04-10 07:41:00	2020-04-10 07:41:00	2020-04-10 07:41:00	2020	4	10	1	1	9B5747F5-1C7B-4E1A-AE46-C7F5FDE656C2.JPEG	2020-04-10 07:42:00	2020-04-10 07:42:00	2020-04-10 07:42:00	2020	4	10
16	CP288	86	Prod	1106	81	2044	23	Klinikum der Universitat Munchen- Grosshadern	DE002	World	9519	Product change TP2	0	5852	APP_PRODUCTCHANGE_TP_2	Product change TP2	19		48535	Baseplate change TP 1	0		169729	12	2020-04-14 05:00:05	2020-04-14 05:00:05	2020-07-17 12:52:32	DE002	54	54	1	1	BE192196-307D-44A1-9C13-AFC3CAB1DC38.JPEG	2020-04-12 08:13:00	2020-04-12 08:13:00	2020-04-12 08:13:00	2020	4	12	1	1	0246C8E6-51A5-4EC0-B485-E43EC3D9FC87.JPEG	2020-04-12 08:14:00	2020-04-12 08:14:00	2020-04-12 08:14:00	2020	4	12
16	CP288	86	Prod	1106	81	2044	23	Klinikum der Universitat Munchen- Grosshadern	DE002	World	9519	Product change TP2	0	5852	APP_PRODUCTCHANGE_TP_2	Product change TP2	19		48535	Baseplate change TP 1	0		169744	13	2020-04-14 06:00:27	2020-04-14 06:00:27	2020-07-17 12:52:32	DE002	55	55	1	1	709B1154-A9C6-441B-84D0-805A8714E710.JPEG	2020-04-14 06:48:00	2020-04-14 06:48:00	2020-04-14 06:48:00	2020	4	14	1	1	B25E382C-D140-4F98-8CC6-2F553C2E7D11.JPEG	2020-04-14 06:48:00	2020-04-14 06:48:00	2020-04-14 06:48:00	2020	4	14
16	CP288	86	Prod	1106	81	2044	23	Klinikum der Universitat Munchen- Grosshadern	DE002	World	9519	Product change TP2	0	5852	APP_PRODUCTCHANGE_TP_2	Product change TP2	19		48535	Baseplate change TP 1	0		171126	14	2020-04-18 07:00:09	2020-04-18 07:00:09	2020-07-17 12:52:32	DE002	56	56	1	1	C23F7C46-FB86-4AA1-A3D7-17D484E58661.JPEG	2020-04-16 07:43:00	2020-04-16 07:43:00	2020-04-16 07:43:00	2020	4	16	1	1	A1AE6743-CAFE-4F07-B17F-DE68EB90A3C2.JPEG	2020-04-16 07:43:00	2020-04-16 07:43:00	2020-04-16 07:43:00	2020	4	16
16	CP288	86	Prod	1106	81	2044	23	Klinikum der Universitat Munchen- Grosshadern	DE002	World	9519	Product change TP2	0	5852	APP_PRODUCTCHANGE_TP_2	Product change TP2	19		48535	Baseplate change TP 1	0		171129	15	2020-04-18 07:00:12	2020-04-18 07:00:12	2020-07-17 12:52:32	DE002	57	57	1	1	138507FC-A518-4CE5-B3E6-987FD7437178.JPEG	2020-04-18 08:18:00	2020-04-18 08:18:00	2020-04-18 08:18:00	2020	4	18	1	1	3B22E73C-D556-4900-AE2E-B14F3C5CF69A.JPEG	2020-04-18 08:19:00	2020-04-18 08:19:00	2020-04-18 08:19:00	2020	4	18
16	CP288	86	Prod	1106	81	2044	23	Klinikum der Universitat Munchen- Grosshadern	DE002	World	9519	Product change TP2	0	5852	APP_PRODUCTCHANGE_TP_2	Product change TP2	19		48535	Baseplate change TP 1	0		172152	16	2020-04-23 06:00:13	2020-04-23 06:00:13	2020-07-17 12:52:32	DE002	58	58	1	1	4422F9EF-13C5-4CB7-9932-8397B81A5001.JPEG	2020-04-21 07:34:00	2020-04-21 07:34:00	2020-04-21 07:34:00	2020	4	21	1	1	36EE9BCB-37E2-4A6B-A79C-9C759E69AD16.JPEG	2020-04-21 07:36:00	2020-04-21 07:36:00	2020-04-21 07:36:00	2020	4	21
16	CP288	86	Prod	1106	81	2044	23	Klinikum der Universitat Munchen- Grosshadern	DE002	World	9519	Product change TP2	0	5852	APP_PRODUCTCHANGE_TP_2	Product change TP2	19		48535	Baseplate change TP 1	0		172167	17	2020-04-23 07:00:04	2020-04-23 07:00:04	2020-07-17 12:52:32	DE002	59	59	1	1	1655A30A-28AE-49DF-9D68-7BF5F13AB170.JPEG	2020-04-23 07:57:00	2020-04-23 07:57:00	2020-04-23 07:57:00	2020	4	23	1	1	28FE9D15-474B-491C-9B2C-D71A8FA52B2D.JPEG	2020-04-23 07:57:00	2020-04-23 07:57:00	2020-04-23 07:57:00	2020	4	23
16	CP288	86	Prod	1106	81	2044	23	Klinikum der Universitat Munchen- Grosshadern	DE002	World	9519	Product change TP2	0	5852	APP_PRODUCTCHANGE_TP_2	Product change TP2	19		48535	Baseplate change TP 1	0		172549	18	2020-04-27 05:00:06	2020-04-27 05:00:06	2020-07-17 12:52:32	DE002	60	60	1	1	446D4CC8-B820-4388-805C-66ACA2E65B5A.JPEG	2020-04-25 08:32:00	2020-04-25 08:32:00	2020-04-25 08:32:00	2020	4	25	1	1	7A77BCCE-B6C9-4CB8-9BD7-7C924E688806.JPEG	2020-04-25 08:32:00	2020-04-25 08:32:00	2020-04-25 08:32:00	2020	4	25
16	CP288	86	Prod	1106	81	2044	23	Klinikum der Universitat Munchen- Grosshadern	DE002	World	9519	Product change TP2	0	5852	APP_PRODUCTCHANGE_TP_2	Product change TP2	19		48535	Baseplate change TP 1	0		173962	19	2020-05-04 08:00:14	2020-05-04 08:00:14	2020-07-17 12:52:32	DE002	61	61	1	1	60B22550-D3B8-4EFB-859D-0B2A72601C01.JPEG	2020-04-27 06:53:00	2020-04-27 06:53:00	2020-04-27 06:53:00	2020	4	27	1	1	05679CBD-1D32-418A-99AB-642A64BA90FF.JPEG	2020-04-27 06:55:00	2020-04-27 06:55:00	2020-04-27 06:55:00	2020	4	27
16	CP288	86	Prod	1106	81	2044	23	Klinikum der Universitat Munchen- Grosshadern	DE002	World	9519	Product change TP2	0	5852	APP_PRODUCTCHANGE_TP_2	Product change TP2	19		48535	Baseplate change TP 1	0		173974	20	2020-05-04 11:00:08	2020-05-04 11:00:08	2020-07-17 12:52:32	DE002	62	62	1	1	5E84F27A-20E1-422E-8013-A509C54F71B0.JPEG	2020-04-28 07:41:00	2020-04-28 07:41:00	2020-04-28 07:41:00	2020	4	28	1	1	7B9AF055-80B0-40A7-A6FD-A2F209468073.JPEG	2020-04-28 07:42:00	2020-04-28 07:42:00	2020-04-28 07:42:00	2020	4	28
16	CP288	86	Prod	1106	81	2044	23	Klinikum der Universitat Munchen- Grosshadern	DE002	World	9519	Product change TP2	0	5852	APP_PRODUCTCHANGE_TP_2	Product change TP2	19		48535	Baseplate change TP 1	0		173977	21	2020-05-04 11:00:11	2020-05-04 11:00:11	2020-07-17 12:52:32	DE002	63	63	1	1	13254899-7849-4D00-AC7F-889CB2D78D5A.JPEG	2020-04-30 07:37:00	2020-04-30 07:37:00	2020-04-30 07:37:00	2020	4	30	1	1	94531A9B-AC1E-43D6-8E57-3A7E067A617C.JPEG	2020-04-30 07:37:00	2020-04-30 07:37:00	2020-04-30 07:37:00	2020	4	30
16	CP288	86	Prod	1106	81	2044	23	Klinikum der Universitat Munchen- Grosshadern	DE002	World	9519	Product change TP2	0	5852	APP_PRODUCTCHANGE_TP_2	Product change TP2	19		48535	Baseplate change TP 1	0		173983	22	2020-05-04 14:00:05	2020-05-04 14:00:05	2020-07-17 12:52:32	DE002	64	64	1	1	41D99289-5853-4A58-94E7-C9236EBC7CAA.JPEG	2020-05-03 08:09:00	2020-05-03 08:09:00	2020-05-03 08:09:00	2020	5	3	1	1	59226D21-2627-4370-B156-AD295CEE7B65.JPEG	2020-05-03 08:09:00	2020-05-03 08:09:00	2020-05-03 08:09:00	2020	5	3
16	CP288	86	Prod	1107	81	2045	23	Klinikum der Universitat Munchen- Grosshadern	DE002	World	9547	Product change TP1	0	5849	APP_PRODUCTCHANGE_TP_1	Product change TP1	17		48594	Baseplate change TP 1	0		132148	1	2020-02-07 15:00:05	2020-02-07 15:00:05	2020-07-17 12:52:32	DE002	0	0	1	1	F4A253AF-E5A7-4BBE-9B16-21CD146123F9.JPEG	2020-02-07 15:37:00	2020-02-07 15:37:00	2020-02-07 15:37:00	2020	2	7	1	1	ADDB2CD3-2F56-46F4-9EB4-1582E4B99C29.JPEG	2020-02-07 15:37:00	2020-02-07 15:37:00	2020-02-07 15:37:00	2020	2	7
16	CP288	86	Prod	1107	81	2045	23	Klinikum der Universitat Munchen- Grosshadern	DE002	World	9550	Product change TP2	0	5852	APP_PRODUCTCHANGE_TP_2	Product change TP2	19		48595	Baseplate change TP 1	0		132150	1	2020-03-26 12:00:03	2020-03-26 12:00:03	2020-07-17 12:52:32	DE002	33	33	1	1	4ECE596A-206B-4652-9E87-350F5B748D65.JPEG	2020-03-24 18:11:00	2020-03-24 18:11:00	2020-03-24 18:11:00	2020	3	24	1	1	9382204B-EA02-4B49-AE17-8B248FC8A2F2.JPEG	2020-03-24 18:12:00	2020-03-24 18:12:00	2020-03-24 18:12:00	2020	3	24
16	CP288	86	Prod	1107	81	2045	23	Klinikum der Universitat Munchen- Grosshadern	DE002	World	9547	Product change TP1	0	5849	APP_PRODUCTCHANGE_TP_1	Product change TP1	17		48594	Baseplate change TP 1	0		146467	2	2020-02-14 11:00:12	2020-02-14 11:00:12	2020-07-17 12:52:32	DE002	1	1	1	1	C636A181-42EA-48F6-808A-D8D10D78557C.JPEG	2020-02-08 19:32:00	2020-02-08 19:32:00	2020-02-08 19:32:00	2020	2	8	1	1	0C835F7E-C925-4F8F-B9AF-19A213C23C2E.JPEG	2020-02-08 19:33:00	2020-02-08 19:33:00	2020-02-08 19:33:00	2020	2	8
16	CP288	86	Prod	1107	81	2045	23	Klinikum der Universitat Munchen- Grosshadern	DE002	World	9547	Product change TP1	0	5849	APP_PRODUCTCHANGE_TP_1	Product change TP1	17		48594	Baseplate change TP 1	0		146470	3	2020-02-14 11:00:19	2020-02-14 11:00:19	2020-07-17 12:52:32	DE002	2	2	1	1	E4A6908E-3950-4DB7-8A7C-17AB5D5FC6C5.JPEG	2020-02-10 14:22:00	2020-02-10 14:22:00	2020-02-10 14:22:00	2020	2	10	1	1	6B1D8226-E0A1-4CDD-B82D-B19BF5FC4824.JPEG	2020-02-10 14:22:00	2020-02-10 14:22:00	2020-02-10 14:22:00	2020	2	10
16	CP288	86	Prod	1107	81	2045	23	Klinikum der Universitat Munchen- Grosshadern	DE002	World	9547	Product change TP1	0	5849	APP_PRODUCTCHANGE_TP_1	Product change TP1	17		48594	Baseplate change TP 1	0		146473	4	2020-02-14 12:00:05	2020-02-14 12:00:05	2020-07-17 12:52:32	DE002	3	3	1	1	11FF15C5-0FB6-4D2A-93C2-C1DF111D4CB5.JPEG	2020-02-11 22:51:00	2020-02-11 22:51:00	2020-02-11 22:51:00	2020	2	11	1	1	AFA85B89-7495-404B-AEDA-2C95F1C3CFE1.JPEG	2020-02-11 22:52:00	2020-02-11 22:52:00	2020-02-11 22:52:00	2020	2	11
16	CP288	86	Prod	1107	81	2045	23	Klinikum der Universitat Munchen- Grosshadern	DE002	World	9547	Product change TP1	0	5849	APP_PRODUCTCHANGE_TP_1	Product change TP1	17		48594	Baseplate change TP 1	0		146476	5	2020-02-14 12:00:15	2020-02-14 12:00:15	2020-07-17 12:52:32	DE002	4	4	1	1	578BE248-4ADC-48F5-9457-4B357626B1B7.JPEG	2020-02-13 06:15:00	2020-02-13 06:15:00	2020-02-13 06:15:00	2020	2	13	1	1	DD279509-899B-4AAE-B2FE-0D78CFE4AC16.JPEG	2020-02-13 06:15:00	2020-02-13 06:15:00	2020-02-13 06:15:00	2020	2	13
16	CP288	86	Prod	1107	81	2045	23	Klinikum der Universitat Munchen- Grosshadern	DE002	World	9547	Product change TP1	0	5849	APP_PRODUCTCHANGE_TP_1	Product change TP1	17		48594	Baseplate change TP 1	0		146518	6	2020-02-15 18:00:04	2020-02-15 18:00:04	2020-07-17 12:52:32	DE002	5	5	1	1	C2C44185-CA00-4595-B818-4DBFE499CFF2.JPEG	2020-02-14 11:40:00	2020-02-14 11:40:00	2020-02-14 11:40:00	2020	2	14	1	1	5743E51C-71CD-4E17-B4DA-B871007E0919.JPEG	2020-02-14 11:41:00	2020-02-14 11:41:00	2020-02-14 11:41:00	2020	2	14
16	CP288	86	Prod	1107	81	2045	23	Klinikum der Universitat Munchen- Grosshadern	DE002	World	9547	Product change TP1	0	5849	APP_PRODUCTCHANGE_TP_1	Product change TP1	17		48594	Baseplate change TP 1	0		150481	7	2020-02-20 07:00:06	2020-02-20 07:00:06	2020-07-17 12:52:32	DE002	6	6	1	1	6A9C8285-C0C2-48CD-A141-7C0F37F85F90.JPEG	2020-02-15 18:58:00	2020-02-15 18:58:00	2020-02-15 18:58:00	2020	2	15	1	1	0FF217CE-38B9-4455-90D7-CF28765FB0F9.JPEG	2020-02-15 18:58:00	2020-02-15 18:58:00	2020-02-15 18:58:00	2020	2	15
16	CP288	86	Prod	1107	81	2045	23	Klinikum der Universitat Munchen- Grosshadern	DE002	World	9547	Product change TP1	0	5849	APP_PRODUCTCHANGE_TP_1	Product change TP1	17		48594	Baseplate change TP 1	0		151429	8	2020-02-20 10:00:04	2020-02-20 10:00:04	2020-07-17 12:52:32	DE002	7	7	1	1	57AA6C2A-1102-41D1-A3F8-3FF26923CA93.JPEG	2020-02-17 10:43:00	2020-02-17 10:43:00	2020-02-17 10:43:00	2020	2	17	1	1	53169387-6D21-49D5-BE6D-9384108D24BA.JPEG	2020-02-17 10:44:00	2020-02-17 10:44:00	2020-02-17 10:44:00	2020	2	17
16	CP288	86	Prod	1107	81	2045	23	Klinikum der Universitat Munchen- Grosshadern	DE002	World	9547	Product change TP1	0	5849	APP_PRODUCTCHANGE_TP_1	Product change TP1	17		48594	Baseplate change TP 1	0		151577	9	2020-02-20 11:00:14	2020-02-20 11:00:14	2020-07-17 12:52:32	DE002	8	8	1	1	2FCFA0FC-7042-489E-A96C-1BC72E845B75.JPEG	2020-02-18 19:58:00	2020-02-18 19:58:00	2020-02-18 19:58:00	2020	2	18	1	1	0D7B41B0-0FC7-466B-862B-A0FF1E266A9C.JPEG	2020-02-18 19:58:00	2020-02-18 19:58:00	2020-02-18 19:58:00	2020	2	18
16	CP288	86	Prod	1107	81	2045	23	Klinikum der Universitat Munchen- Grosshadern	DE002	World	9547	Product change TP1	0	5849	APP_PRODUCTCHANGE_TP_1	Product change TP1	17		48594	Baseplate change TP 1	0		152809	10	2020-02-23 19:00:04	2020-02-23 19:00:04	2020-07-17 12:52:32	DE002	10	10	1	1	D0E26FAF-2234-49B7-BAA1-CC8C15885EAA.JPEG	2020-02-22 09:49:00	2020-02-22 09:49:00	2020-02-22 09:49:00	2020	2	22	1	1	55CFC642-8E58-442B-8520-FE27B8CB04FA.JPEG	2020-02-22 09:50:00	2020-02-22 09:50:00	2020-02-22 09:50:00	2020	2	22
16	CP288	86	Prod	1107	81	2045	23	Klinikum der Universitat Munchen- Grosshadern	DE002	World	9547	Product change TP1	0	5849	APP_PRODUCTCHANGE_TP_1	Product change TP1	17		48594	Baseplate change TP 1	0		152821	11	2020-02-24 06:00:13	2020-02-24 06:00:13	2020-07-17 12:52:32	DE002	9	9	1	1	A30C1A06-7266-4106-885E-D40E8AFDBE77.JPEG	2020-02-20 07:51:00	2020-02-20 07:51:00	2020-02-20 07:51:00	2020	2	20	1	1	2B7C540A-ED6F-4046-8EA5-387A11E50705.JPEG	2020-02-20 07:52:00	2020-02-20 07:52:00	2020-02-20 07:52:00	2020	2	20
16	CP288	86	Prod	1107	81	2045	23	Klinikum der Universitat Munchen- Grosshadern	DE002	World	9547	Product change TP1	0	5849	APP_PRODUCTCHANGE_TP_1	Product change TP1	17		48594	Baseplate change TP 1	0		153194	12	2020-02-24 22:00:10	2020-02-24 22:00:10	2020-07-17 12:52:32	DE002	11	11	1	1	8E3107BA-B87A-43DC-A651-6CBA046AD0D7.JPEG	2020-02-23 19:49:00	2020-02-23 19:49:00	2020-02-23 19:49:00	2020	2	23	1	1	85A9E300-1A00-4CB8-B83C-28EE9BA19625.JPEG	2020-02-23 19:50:00	2020-02-23 19:50:00	2020-02-23 19:50:00	2020	2	23
16	CP288	86	Prod	1107	81	2045	23	Klinikum der Universitat Munchen- Grosshadern	DE002	World	9547	Product change TP1	0	5849	APP_PRODUCTCHANGE_TP_1	Product change TP1	17		48594	Baseplate change TP 1	0		154291	13	2020-02-25 20:00:08	2020-02-25 20:00:08	2020-07-17 12:52:32	DE002	12	12	1	1	A4B500E7-A5F7-48D8-88FB-E9E02EBC0F99.JPEG	2020-02-24 22:19:00	2020-02-24 22:19:00	2020-02-24 22:19:00	2020	2	24	1	1	7471BC6B-A0CB-4297-9838-51096F7606E7.JPEG	2020-02-24 22:19:00	2020-02-24 22:19:00	2020-02-24 22:19:00	2020	2	24
16	CP288	86	Prod	1107	81	2045	23	Klinikum der Universitat Munchen- Grosshadern	DE002	World	9547	Product change TP1	0	5849	APP_PRODUCTCHANGE_TP_1	Product change TP1	17		48594	Baseplate change TP 1	0		154924	14	2020-03-02 07:00:14	2020-03-02 07:00:14	2020-07-17 12:52:32	DE002	13	13	1	1	891941A3-651E-4486-9FE8-F0F07423A502.JPEG	2020-02-25 20:16:00	2020-02-25 20:16:00	2020-02-25 20:16:00	2020	2	25	1	1	0A2E11DF-21F6-4546-AB7D-3BB0D3E88984.JPEG	2020-02-25 20:17:00	2020-02-25 20:17:00	2020-02-25 20:17:00	2020	2	25
16	CP288	86	Prod	1107	81	2045	23	Klinikum der Universitat Munchen- Grosshadern	DE002	World	9547	Product change TP1	0	5849	APP_PRODUCTCHANGE_TP_1	Product change TP1	17		48594	Baseplate change TP 1	0		154927	15	2020-03-02 07:00:24	2020-03-02 07:00:24	2020-07-17 12:52:32	DE002	14	14	1	1	FA413959-3E73-4B6B-8F90-D0E669C0DE01.JPEG	2020-02-26 18:11:00	2020-02-26 18:11:00	2020-02-26 18:11:00	2020	2	26	1	1	2A277208-23E6-4453-8AAE-08682919D1B3.JPEG	2020-02-26 18:12:00	2020-02-26 18:12:00	2020-02-26 18:12:00	2020	2	26
16	CP288	86	Prod	1107	81	2045	23	Klinikum der Universitat Munchen- Grosshadern	DE002	World	9547	Product change TP1	0	5849	APP_PRODUCTCHANGE_TP_1	Product change TP1	17		48594	Baseplate change TP 1	0		154930	16	2020-03-02 08:00:04	2020-03-02 08:00:04	2020-07-17 12:52:32	DE002	15	15	1	1	9F2455C3-6C42-4051-A19F-5CB7B381FD1E.JPEG	2020-02-28 07:03:00	2020-02-28 07:03:00	2020-02-28 07:03:00	2020	2	28	1	1	BE7A0F79-89C3-4B6A-BBCB-78D7CEFD7335.JPEG	2020-02-28 07:03:00	2020-02-28 07:03:00	2020-02-28 07:03:00	2020	2	28
16	CP288	86	Prod	1107	81	2045	23	Klinikum der Universitat Munchen- Grosshadern	DE002	World	9547	Product change TP1	0	5849	APP_PRODUCTCHANGE_TP_1	Product change TP1	17		48594	Baseplate change TP 1	0		154940	17	2020-03-02 09:00:23	2020-03-02 09:00:23	2020-07-17 12:52:32	DE002	16	16	1	1	2C1315C8-4B99-4195-8F4C-11DDF7C4C95E.JPEG	2020-02-29 15:54:00	2020-02-29 15:54:00	2020-02-29 15:54:00	2020	2	29	1	1	B9B2D6FB-6A61-4FE4-B850-BC549B446FEF.JPEG	2020-02-29 15:56:00	2020-02-29 15:56:00	2020-02-29 15:56:00	2020	2	29
16	CP288	86	Prod	1107	81	2045	23	Klinikum der Universitat Munchen- Grosshadern	DE002	World	9547	Product change TP1	0	5849	APP_PRODUCTCHANGE_TP_1	Product change TP1	17		48594	Baseplate change TP 1	0		156917	18	2020-03-03 12:00:05	2020-03-03 12:00:05	2020-07-17 12:52:32	DE002	17	17	1	1	9EEE9CEF-7B6D-4D2B-B3A1-C813A3843A7E.JPEG	2020-03-02 07:40:00	2020-03-02 07:40:00	2020-03-02 07:40:00	2020	3	2	1	1	8E31FC86-D9C6-4E67-92A6-54F1FB5D93E7.JPEG	2020-03-02 07:40:00	2020-03-02 07:40:00	2020-03-02 07:40:00	2020	3	2
16	CP288	86	Prod	1107	81	2045	23	Klinikum der Universitat Munchen- Grosshadern	DE002	World	9547	Product change TP1	0	5849	APP_PRODUCTCHANGE_TP_1	Product change TP1	17		48594	Baseplate change TP 1	0		163145	19	2020-03-23 08:00:06	2020-03-23 08:00:06	2020-07-17 12:52:32	DE002	18	18	1	1	E86FF0F9-4AD2-48BC-AA94-A10DCA21B014.JPEG	2020-03-03 12:16:00	2020-03-03 12:16:00	2020-03-03 12:16:00	2020	3	3	1	1	DF2D866C-7999-4D42-8D8A-0F03CC6BFCE9.JPEG	2020-03-03 12:16:00	2020-03-03 12:16:00	2020-03-03 12:16:00	2020	3	3
16	CP288	86	Prod	1107	81	2045	23	Klinikum der Universitat Munchen- Grosshadern	DE002	World	9547	Product change TP1	0	5849	APP_PRODUCTCHANGE_TP_1	Product change TP1	17		48594	Baseplate change TP 1	0		163148	20	2020-03-23 08:00:09	2020-03-23 08:00:09	2020-07-17 12:52:32	DE002	19	19	1	1	3FC17F34-2C48-44E7-B3A4-A1382DBE3107.JPEG	2020-03-04 16:15:00	2020-03-04 16:15:00	2020-03-04 16:15:00	2020	3	4	1	1	352ADE29-0989-458A-96D9-F9256AB10FE8.JPEG	2020-03-04 16:16:00	2020-03-04 16:16:00	2020-03-04 16:16:00	2020	3	4
16	CP288	86	Prod	1107	81	2045	23	Klinikum der Universitat Munchen- Grosshadern	DE002	World	9547	Product change TP1	0	5849	APP_PRODUCTCHANGE_TP_1	Product change TP1	17		48594	Baseplate change TP 1	0		163151	21	2020-03-23 08:00:16	2020-03-23 08:00:16	2020-07-17 12:52:32	DE002	20	20	1	1	934FB8A5-2AFD-4A08-86CE-86382A352633.JPEG	2020-03-05 16:55:00	2020-03-05 16:55:00	2020-03-05 16:55:00	2020	3	5	1	1	5D1D47E2-2B15-45D2-A556-D7205BCF4E61.JPEG	2020-03-05 16:55:00	2020-03-05 16:55:00	2020-03-05 16:55:00	2020	3	5
16	CP288	86	Prod	1107	81	2045	23	Klinikum der Universitat Munchen- Grosshadern	DE002	World	9547	Product change TP1	0	5849	APP_PRODUCTCHANGE_TP_1	Product change TP1	17		48594	Baseplate change TP 1	0		163154	22	2020-03-23 08:00:28	2020-03-23 08:00:28	2020-07-17 12:52:32	DE002	21	21	1	1	E631595F-F86F-4CCF-90E7-59FE420543EB.JPEG	2020-03-07 09:41:00	2020-03-07 09:41:00	2020-03-07 09:41:00	2020	3	7	1	1	43D34FE4-9306-4844-9DD9-26C5D08D9EE5.JPEG	2020-03-07 09:42:00	2020-03-07 09:42:00	2020-03-07 09:42:00	2020	3	7
16	CP288	86	Prod	1107	81	2045	23	Klinikum der Universitat Munchen- Grosshadern	DE002	World	9547	Product change TP1	0	5849	APP_PRODUCTCHANGE_TP_1	Product change TP1	17		48594	Baseplate change TP 1	0		163157	23	2020-03-23 08:00:34	2020-03-23 08:00:34	2020-07-17 12:52:32	DE002	22	22	1	1	45E665B0-28EF-4CBC-AA5A-31D08A2E3192.JPEG	2020-03-09 07:11:00	2020-03-09 07:11:00	2020-03-09 07:11:00	2020	3	9	1	1	61017D92-B7DE-41B5-A8CB-6548E8852936.JPEG	2020-03-09 07:12:00	2020-03-09 07:12:00	2020-03-09 07:12:00	2020	3	9
16	CP288	86	Prod	1107	81	2045	23	Klinikum der Universitat Munchen- Grosshadern	DE002	World	9547	Product change TP1	0	5849	APP_PRODUCTCHANGE_TP_1	Product change TP1	17		48594	Baseplate change TP 1	0		163368	24	2020-03-23 09:00:15	2020-03-23 09:00:15	2020-07-17 12:52:32	DE002	23	23	1	1	89E0B10A-5A3B-452F-A32B-B1451AC900E2.JPEG	2020-03-11 07:14:00	2020-03-11 07:14:00	2020-03-11 07:14:00	2020	3	11	1	1	8BD9661E-1E58-48CF-98BE-1E730F26B3E0.JPEG	2020-03-11 07:15:00	2020-03-11 07:15:00	2020-03-11 07:15:00	2020	3	11
16	CP288	86	Prod	1107	81	2045	23	Klinikum der Universitat Munchen- Grosshadern	DE002	World	9547	Product change TP1	0	5849	APP_PRODUCTCHANGE_TP_1	Product change TP1	17		48594	Baseplate change TP 1	0		163371	25	2020-03-23 09:00:17	2020-03-23 09:00:17	2020-07-17 12:52:32	DE002	24	24	1	1	5DAAFA5A-102A-4536-BB81-9FE4AABF1439.JPEG	2020-03-12 20:18:00	2020-03-12 20:18:00	2020-03-12 20:18:00	2020	3	12	1	1	812C251C-B77C-49B2-AC75-ED4360A1BC91.JPEG	2020-03-12 20:18:00	2020-03-12 20:18:00	2020-03-12 20:18:00	2020	3	12
16	CP288	86	Prod	1107	81	2045	23	Klinikum der Universitat Munchen- Grosshadern	DE002	World	9547	Product change TP1	0	5849	APP_PRODUCTCHANGE_TP_1	Product change TP1	17		48594	Baseplate change TP 1	0		163374	26	2020-03-23 17:00:09	2020-03-23 17:00:09	2020-07-17 12:52:32	DE002	25	25	1	1	AE1F1E8F-9012-44A3-B817-C1F3832EA694.JPEG	2020-03-14 07:26:00	2020-03-14 07:26:00	2020-03-14 07:26:00	2020	3	14	1	1	F6A415DF-D9CD-41C7-8554-85B778DD248D.JPEG	2020-03-14 07:26:00	2020-03-14 07:26:00	2020-03-14 07:26:00	2020	3	14
16	CP288	86	Prod	1107	81	2045	23	Klinikum der Universitat Munchen- Grosshadern	DE002	World	9547	Product change TP1	0	5849	APP_PRODUCTCHANGE_TP_1	Product change TP1	17		48594	Baseplate change TP 1	0		163377	27	2020-03-23 18:00:09	2020-03-23 18:00:09	2020-07-17 12:52:32	DE002	26	26	1	1	480B2885-59B3-4048-B32C-057EBBF20CC2.JPEG	2020-03-15 10:02:00	2020-03-15 10:02:00	2020-03-15 10:02:00	2020	3	15	1	1	EB264941-6FF5-4595-B60D-9675EC682083.JPEG	2020-03-15 10:03:00	2020-03-15 10:03:00	2020-03-15 10:03:00	2020	3	15
16	CP288	86	Prod	1107	81	2045	23	Klinikum der Universitat Munchen- Grosshadern	DE002	World	9547	Product change TP1	0	5849	APP_PRODUCTCHANGE_TP_1	Product change TP1	17		48594	Baseplate change TP 1	0		163383	28	2020-03-23 19:00:07	2020-03-23 19:00:07	2020-07-17 12:52:32	DE002	27	27	1	1	A20F1BCC-D584-4AAE-ADB2-948D25F5BB5B.JPEG	2020-03-17 09:01:00	2020-03-17 09:01:00	2020-03-17 09:01:00	2020	3	17	1	1	90FF7A1E-511A-40E0-A5CD-12EB8EA94EF7.JPEG	2020-03-17 09:01:00	2020-03-17 09:01:00	2020-03-17 09:01:00	2020	3	17
16	CP288	86	Prod	1107	81	2045	23	Klinikum der Universitat Munchen- Grosshadern	DE002	World	9547	Product change TP1	0	5849	APP_PRODUCTCHANGE_TP_1	Product change TP1	17		48594	Baseplate change TP 1	0		163389	29	2020-03-23 20:00:02	2020-03-23 20:00:02	2020-07-17 12:52:32	DE002	28	28	1	1	F42D3996-FCBA-469C-95CF-B43E27ED2706.JPEG	2020-03-19 07:03:00	2020-03-19 07:03:00	2020-03-19 07:03:00	2020	3	19	1	1	339CB59E-6F09-4F43-B7C7-7AE682B87F41.JPEG	2020-03-19 07:03:00	2020-03-19 07:03:00	2020-03-19 07:03:00	2020	3	19
16	CP288	86	Prod	1107	81	2045	23	Klinikum der Universitat Munchen- Grosshadern	DE002	World	9547	Product change TP1	0	5849	APP_PRODUCTCHANGE_TP_1	Product change TP1	17		48594	Baseplate change TP 1	0		163425	30	2020-03-24 07:00:40	2020-03-24 07:00:40	2020-07-17 12:52:32	DE002	29	29	1	1	4EBA7CAD-A33B-4ED9-AB54-C88B9CB30DE3.JPEG	2020-03-20 09:44:00	2020-03-20 09:44:00	2020-03-20 09:44:00	2020	3	20	1	1	CC1DD072-B34B-455A-BA68-51491AD94BD2.JPEG	2020-03-20 09:45:00	2020-03-20 09:45:00	2020-03-20 09:45:00	2020	3	20
16	CP288	86	Prod	1107	81	2045	23	Klinikum der Universitat Munchen- Grosshadern	DE002	World	9547	Product change TP1	0	5849	APP_PRODUCTCHANGE_TP_1	Product change TP1	17		48594	Baseplate change TP 1	0		163434	31	2020-03-24 08:00:11	2020-03-24 08:00:11	2020-07-17 12:52:32	DE002	30	30	1	1	C4B95A2F-018C-4D4B-8303-1E88D5895966.JPEG	2020-03-21 15:56:00	2020-03-21 15:56:00	2020-03-21 15:56:00	2020	3	21	1	1	C94E248D-415F-427F-87D5-6A3285CE4519.JPEG	2020-03-21 15:57:00	2020-03-21 15:57:00	2020-03-21 15:57:00	2020	3	21
16	CP288	86	Prod	1107	81	2045	23	Klinikum der Universitat Munchen- Grosshadern	DE002	World	9547	Product change TP1	0	5849	APP_PRODUCTCHANGE_TP_1	Product change TP1	17		48594	Baseplate change TP 1	0		163437	32	2020-03-24 08:00:19	2020-03-24 08:00:19	2020-07-17 12:52:32	DE002	31	31	1	1	CFA8416A-7BE4-4067-A6CF-DDC1F11ECF47.JPEG	2020-03-23 06:40:00	2020-03-23 06:40:00	2020-03-23 06:40:00	2020	3	23	1	1	F4BDFA34-3F80-4363-87B1-AA4AEE83E1A5.JPEG	2020-03-23 06:41:00	2020-03-23 06:41:00	2020-03-23 06:41:00	2020	3	23
16	CP288	86	Prod	1107	81	2045	23	Klinikum der Universitat Munchen- Grosshadern	DE002	World	9550	Product change TP2	0	5852	APP_PRODUCTCHANGE_TP_2	Product change TP2	19		48595	Baseplate change TP 1	0		163890	2	2020-03-26 12:00:06	2020-03-26 12:00:06	2020-07-17 12:52:32	DE002	34	34	1	1	ED65AE1A-53F6-4C9C-8D5E-96D90F4FE087.JPEG	2020-03-26 07:31:00	2020-03-26 07:31:00	2020-03-26 07:31:00	2020	3	26	1	1	FE269312-4745-4F27-8597-1E8DFA249289.JPEG	2020-03-26 07:31:00	2020-03-26 07:31:00	2020-03-26 07:31:00	2020	3	26
16	CP288	86	Prod	1107	81	2045	23	Klinikum der Universitat Munchen- Grosshadern	DE002	World	9550	Product change TP2	0	5852	APP_PRODUCTCHANGE_TP_2	Product change TP2	19		48595	Baseplate change TP 1	0		163893	3	2020-03-26 14:00:42	2020-03-26 14:00:42	2020-07-17 12:52:32	DE002	35	35	1	1	8536306D-9C5F-433C-A454-BA7B2F5171CC.JPEG	2020-03-26 12:13:00	2020-03-26 12:13:00	2020-03-26 12:13:00	2020	3	26	1	1	8D27CB30-DE5F-4444-8A25-C5A1966BB4C3.JPEG	2020-03-26 12:13:00	2020-03-26 12:13:00	2020-03-26 12:13:00	2020	3	26
16	CP288	86	Prod	1107	81	2045	23	Klinikum der Universitat Munchen- Grosshadern	DE002	World	9550	Product change TP2	0	5852	APP_PRODUCTCHANGE_TP_2	Product change TP2	19		48595	Baseplate change TP 1	0		165278	4	2020-03-31 18:00:05	2020-03-31 18:00:05	2020-07-17 12:52:32	DE002	36	36	1	1	5AED3AAA-ACAB-4993-8E29-44650E34EBFF.JPEG	2020-03-26 14:53:00	2020-03-26 14:53:00	2020-03-26 14:53:00	2020	3	26	1	1	7BDE8709-BD0F-4D41-BEE1-93EC29817CB4.JPEG	2020-03-26 14:53:00	2020-03-26 14:53:00	2020-03-26 14:53:00	2020	3	26
16	CP288	86	Prod	1107	81	2045	23	Klinikum der Universitat Munchen- Grosshadern	DE002	World	9550	Product change TP2	0	5852	APP_PRODUCTCHANGE_TP_2	Product change TP2	19		48595	Baseplate change TP 1	0		165281	5	2020-03-31 18:00:09	2020-03-31 18:00:09	2020-07-17 12:52:32	DE002	37	37	1	1	2C6B37A9-FD6C-423C-8CBD-2E4F9F8F32A1.JPEG	2020-03-27 18:42:00	2020-03-27 18:42:00	2020-03-27 18:42:00	2020	3	27	1	1	B891065E-E037-4A6C-9DC8-FB5CE9098DF0.JPEG	2020-03-27 18:42:00	2020-03-27 18:42:00	2020-03-27 18:42:00	2020	3	27
16	CP288	86	Prod	1107	81	2045	23	Klinikum der Universitat Munchen- Grosshadern	DE002	World	9550	Product change TP2	0	5852	APP_PRODUCTCHANGE_TP_2	Product change TP2	19		48595	Baseplate change TP 1	0		165287	6	2020-03-31 19:00:08	2020-03-31 19:00:08	2020-07-17 12:52:32	DE002	38	38	1	1	63336CCF-2206-47C2-9254-FE663F50C6C8.JPEG	2020-03-28 19:35:00	2020-03-28 19:35:00	2020-03-28 19:35:00	2020	3	28	1	1	889E5CF6-49FB-4E6B-84C1-0FE15F1AE5B3.JPEG	2020-03-28 19:36:00	2020-03-28 19:36:00	2020-03-28 19:36:00	2020	3	28
16	CP288	86	Prod	1107	81	2045	23	Klinikum der Universitat Munchen- Grosshadern	DE002	World	9550	Product change TP2	0	5852	APP_PRODUCTCHANGE_TP_2	Product change TP2	19		48595	Baseplate change TP 1	0		165293	7	2020-03-31 20:00:15	2020-03-31 20:00:15	2020-07-17 12:52:32	DE002	39	39	1	1	8D956F3E-10F5-4627-B44E-856B541EEE9A.JPEG	2020-03-30 07:12:00	2020-03-30 07:12:00	2020-03-30 07:12:00	2020	3	30	1	1	50E0B74C-E32F-4735-99E9-1D065BB1B191.JPEG	2020-03-30 07:12:00	2020-03-30 07:12:00	2020-03-30 07:12:00	2020	3	30
16	CP288	86	Prod	1107	81	2045	23	Klinikum der Universitat Munchen- Grosshadern	DE002	World	9550	Product change TP2	0	5852	APP_PRODUCTCHANGE_TP_2	Product change TP2	19		48595	Baseplate change TP 1	0		169147	8	2020-04-07 19:00:05	2020-04-07 19:00:05	2020-07-17 12:52:32	DE002	40	40	1	1	FCBBD889-C4B6-4655-9198-951C508B98B9.JPEG	2020-03-31 19:37:00	2020-03-31 19:37:00	2020-03-31 19:37:00	2020	3	31	1	1	BD5ABDC7-9EC1-4F3F-A3DA-D547CD27015E.JPEG	2020-03-31 19:37:00	2020-03-31 19:37:00	2020-03-31 19:37:00	2020	3	31
16	CP288	86	Prod	1107	81	2045	23	Klinikum der Universitat Munchen- Grosshadern	DE002	World	9550	Product change TP2	0	5852	APP_PRODUCTCHANGE_TP_2	Product change TP2	19		48595	Baseplate change TP 1	0		169150	9	2020-04-07 19:00:10	2020-04-07 19:00:10	2020-07-17 12:52:32	DE002	41	41	1	1	9C32B744-A503-4DE3-A997-197FA44E993F.JPEG	2020-04-02 09:30:00	2020-04-02 09:30:00	2020-04-02 09:30:00	2020	4	2	1	1	A7F00208-EC9D-4D47-8830-BDA0C27C0985.JPEG	2020-04-02 09:30:00	2020-04-02 09:30:00	2020-04-02 09:30:00	2020	4	2
16	CP288	86	Prod	1107	81	2045	23	Klinikum der Universitat Munchen- Grosshadern	DE002	World	9550	Product change TP2	0	5852	APP_PRODUCTCHANGE_TP_2	Product change TP2	19		48595	Baseplate change TP 1	0		169156	10	2020-04-07 20:00:06	2020-04-07 20:00:06	2020-07-17 12:52:32	DE002	42	42	1	1	40BE1742-7C5B-46B2-AA6C-18B0C0848C8B.JPEG	2020-04-03 19:52:00	2020-04-03 19:52:00	2020-04-03 19:52:00	2020	4	3	1	1	991B6685-EDD5-4B07-98F9-4BB01719235B.JPEG	2020-04-03 19:53:00	2020-04-03 19:53:00	2020-04-03 19:53:00	2020	4	3
16	CP288	86	Prod	1107	81	2045	23	Klinikum der Universitat Munchen- Grosshadern	DE002	World	9550	Product change TP2	0	5852	APP_PRODUCTCHANGE_TP_2	Product change TP2	19		48595	Baseplate change TP 1	0		169161	11	2020-04-07 21:00:18	2020-04-07 21:00:18	2020-07-17 12:52:32	DE002	43	43	1	1	74B18894-D4A3-457F-AD77-230179AA4C35.JPEG	2020-04-05 10:06:00	2020-04-05 10:06:00	2020-04-05 10:06:00	2020	4	5	1	1	4C9E4D03-BF71-44A9-8015-9F46427844DA.JPEG	2020-04-05 10:07:00	2020-04-05 10:07:00	2020-04-05 10:07:00	2020	4	5
16	CP288	86	Prod	1107	81	2045	23	Klinikum der Universitat Munchen- Grosshadern	DE002	World	9550	Product change TP2	0	5852	APP_PRODUCTCHANGE_TP_2	Product change TP2	19		48595	Baseplate change TP 1	0		169164	12	2020-04-08 00:00:04	2020-04-08 00:00:04	2020-07-17 12:52:32	DE002	44	44	1	1	62ECDA1D-E413-47E1-AFE6-D44D254AAF5C.JPEG	2020-04-06 19:38:00	2020-04-06 19:38:00	2020-04-06 19:38:00	2020	4	6	1	1	CF7223F1-B02C-4F3B-93AE-F43E8B0B84DE.JPEG	2020-04-06 19:39:00	2020-04-06 19:39:00	2020-04-06 19:39:00	2020	4	6
16	CP288	86	Prod	1107	81	2045	23	Klinikum der Universitat Munchen- Grosshadern	DE002	World	9550	Product change TP2	0	5852	APP_PRODUCTCHANGE_TP_2	Product change TP2	19		48595	Baseplate change TP 1	0		169299	13	2020-04-09 07:00:09	2020-04-09 07:00:09	2020-07-17 12:52:32	DE002	45	45	1	1	E52A78E3-31E7-4AE2-8055-1BFCBA8CE42C.JPEG	2020-04-07 20:25:00	2020-04-07 20:25:00	2020-04-07 20:25:00	2020	4	7	1	1	66D54352-3897-4120-BB9B-C188A6293FA1.JPEG	2020-04-07 20:25:00	2020-04-07 20:25:00	2020-04-07 20:25:00	2020	4	7
16	CP288	86	Prod	1107	81	2045	23	Klinikum der Universitat Munchen- Grosshadern	DE002	World	9550	Product change TP2	0	5852	APP_PRODUCTCHANGE_TP_2	Product change TP2	19		48595	Baseplate change TP 1	0		185210	14	2020-06-15 09:00:06	2020-06-15 09:00:06	2020-07-17 12:52:32	DE002	46	46	1	1	4E335199-391F-41E4-BAC3-9F4078DAC04C.JPEG	2020-04-09 08:59:00	2020-04-09 08:59:00	2020-04-09 08:59:00	2020	4	9	1	1	8CA80077-75D4-4EBF-BABC-3F1659B7819D.JPEG	2020-04-09 08:59:00	2020-04-09 08:59:00	2020-04-09 08:59:00	2020	4	9
16	CP288	86	Prod	1107	81	2045	23	Klinikum der Universitat Munchen- Grosshadern	DE002	World	9550	Product change TP2	0	5852	APP_PRODUCTCHANGE_TP_2	Product change TP2	19		48595	Baseplate change TP 1	0		185213	15	2020-06-15 09:00:10	2020-06-15 09:00:10	2020-07-17 12:52:32	DE002	47	47	1	1	C57597EC-F4E6-4F01-BD10-AE5B965A50C6.JPEG	2020-04-10 20:05:00	2020-04-10 20:05:00	2020-04-10 20:05:00	2020	4	10	1	1	FE0C1C99-F756-49BF-AADE-736A3CF0C968.JPEG	2020-04-10 20:05:00	2020-04-10 20:05:00	2020-04-10 20:05:00	2020	4	10
16	CP288	86	Prod	1107	81	2045	23	Klinikum der Universitat Munchen- Grosshadern	DE002	World	9550	Product change TP2	0	5852	APP_PRODUCTCHANGE_TP_2	Product change TP2	19		48595	Baseplate change TP 1	0		185216	16	2020-06-15 09:00:13	2020-06-15 09:00:13	2020-07-17 12:52:32	DE002	48	48	1	1	EC815201-FC9D-44ED-AC32-3D37536D7E2C.JPEG	2020-04-12 07:41:00	2020-04-12 07:41:00	2020-04-12 07:41:00	2020	4	12	1	1	BB9F0114-AA11-4885-97E5-D23AFE861531.JPEG	2020-04-12 07:42:00	2020-04-12 07:42:00	2020-04-12 07:42:00	2020	4	12
16	CP288	86	Prod	1107	81	2045	23	Klinikum der Universitat Munchen- Grosshadern	DE002	World	9550	Product change TP2	0	5852	APP_PRODUCTCHANGE_TP_2	Product change TP2	19		48595	Baseplate change TP 1	0		185219	17	2020-06-15 09:00:15	2020-06-15 09:00:15	2020-07-17 12:52:32	DE002	49	49	1	1	E96B38F1-3E61-41C2-9707-E4A89311A7E9.JPEG	2020-04-12 09:39:00	2020-04-12 09:39:00	2020-04-12 09:39:00	2020	4	12	1	1	BE18C315-D826-46D2-8D46-C6331A1BE08C.JPEG	2020-04-12 09:39:00	2020-04-12 09:39:00	2020-04-12 09:39:00	2020	4	12
16	CP288	86	Prod	1107	81	2045	23	Klinikum der Universitat Munchen- Grosshadern	DE002	World	9550	Product change TP2	0	5852	APP_PRODUCTCHANGE_TP_2	Product change TP2	19		48595	Baseplate change TP 1	0		185222	18	2020-06-15 09:00:18	2020-06-15 09:00:18	2020-07-17 12:52:32	DE002	50	50	1	1	AF91D726-A687-4CE9-ABBC-7FD0D67CF7AE.JPEG	2020-04-13 06:09:00	2020-04-13 06:09:00	2020-04-13 06:09:00	2020	4	13	1	1	11DB4540-5A29-4F5D-9DBF-7CFCC9733FA9.JPEG	2020-04-13 06:09:00	2020-04-13 06:09:00	2020-04-13 06:09:00	2020	4	13
16	CP288	86	Prod	1107	81	2045	23	Klinikum der Universitat Munchen- Grosshadern	DE002	World	9550	Product change TP2	0	5852	APP_PRODUCTCHANGE_TP_2	Product change TP2	19		48595	Baseplate change TP 1	0		185230	19	2020-06-15 10:00:07	2020-06-15 10:00:07	2020-07-17 12:52:32	DE002	51	51	1	1	217B5386-8960-4DAD-9D9E-7DFCE5BC1797.JPEG	2020-04-14 07:07:00	2020-04-14 07:07:00	2020-04-14 07:07:00	2020	4	14	1	1	2941C705-8BA7-4970-BB97-162084598DAD.JPEG	2020-04-14 07:07:00	2020-04-14 07:07:00	2020-04-14 07:07:00	2020	4	14
16	CP288	86	Prod	1107	81	2045	23	Klinikum der Universitat Munchen- Grosshadern	DE002	World	9550	Product change TP2	0	5852	APP_PRODUCTCHANGE_TP_2	Product change TP2	19		48595	Baseplate change TP 1	0		185233	20	2020-06-15 10:00:11	2020-06-15 10:00:11	2020-07-17 12:52:32	DE002	52	52	1	1	882886F5-0384-415B-920A-29A8D2168B11.JPEG	2020-04-15 18:46:00	2020-04-15 18:46:00	2020-04-15 18:46:00	2020	4	15	1	1	EA100CE4-D3CC-44A7-897C-F457DC0E8C53.JPEG	2020-04-15 18:47:00	2020-04-15 18:47:00	2020-04-15 18:47:00	2020	4	15
16	CP288	86	Prod	1107	81	2045	23	Klinikum der Universitat Munchen- Grosshadern	DE002	World	9550	Product change TP2	0	5852	APP_PRODUCTCHANGE_TP_2	Product change TP2	19		48595	Baseplate change TP 1	0		185236	21	2020-06-15 11:00:07	2020-06-15 11:00:07	2020-07-17 12:52:32	DE002	53	53	1	1	A3AA22E0-3E5D-4106-9818-0D2CDB6D0856.JPEG	2020-04-17 06:47:00	2020-04-17 06:47:00	2020-04-17 06:47:00	2020	4	17	1	1	981CFB1C-08C4-4D89-82DB-1E6EA2941B1B.JPEG	2020-04-17 06:48:00	2020-04-17 06:48:00	2020-04-17 06:48:00	2020	4	17
16	CP288	86	Prod	1107	81	2045	23	Klinikum der Universitat Munchen- Grosshadern	DE002	World	9550	Product change TP2	0	5852	APP_PRODUCTCHANGE_TP_2	Product change TP2	19		48595	Baseplate change TP 1	0		185239	22	2020-06-15 11:00:09	2020-06-15 11:00:09	2020-07-17 12:52:32	DE002	54	54	1	1	95EBE1C7-C688-4483-BBC1-C9684AC4AC32.JPEG	2020-04-17 07:47:00	2020-04-17 07:47:00	2020-04-17 07:47:00	2020	4	17	1	1	692A0704-E9F4-47BD-AE55-97E60E130EE4.JPEG	2020-04-17 07:47:00	2020-04-17 07:47:00	2020-04-17 07:47:00	2020	4	17
16	CP288	86	Prod	1107	81	2045	23	Klinikum der Universitat Munchen- Grosshadern	DE002	World	9550	Product change TP2	0	5852	APP_PRODUCTCHANGE_TP_2	Product change TP2	19		48595	Baseplate change TP 1	0		185242	23	2020-06-15 13:00:08	2020-06-15 13:00:08	2020-07-17 12:52:32	DE002	55	55	1	1	8B24555B-2786-41B5-AA35-66477EE92A80.JPEG	2020-04-17 08:33:00	2020-04-17 08:33:00	2020-04-17 08:33:00	2020	4	17	1	1	D8D56B66-1442-4E66-8D43-8AD08CAB5D5F.JPEG	2020-04-17 08:33:00	2020-04-17 08:33:00	2020-04-17 08:33:00	2020	4	17
16	CP288	86	Prod	1107	81	2045	23	Klinikum der Universitat Munchen- Grosshadern	DE002	World	9550	Product change TP2	0	5852	APP_PRODUCTCHANGE_TP_2	Product change TP2	19		48595	Baseplate change TP 1	0		185361	24	2020-06-15 16:00:07	2020-06-15 16:00:07	2020-07-17 12:52:32	DE002	56	56	1	1	B17D9A2D-461C-41B4-BDA7-2251C008756B.JPEG	2020-04-18 10:31:00	2020-04-18 10:31:00	2020-04-18 10:31:00	2020	4	18	1	1	4DD9BF24-F2C4-4EE4-A872-AB81E91BE614.JPEG	2020-04-18 10:32:00	2020-04-18 10:32:00	2020-04-18 10:32:00	2020	4	18
16	CP288	86	Prod	1107	81	2045	23	Klinikum der Universitat Munchen- Grosshadern	DE002	World	9550	Product change TP2	0	5852	APP_PRODUCTCHANGE_TP_2	Product change TP2	19		48595	Baseplate change TP 1	0		185518	25	2020-06-15 17:00:07	2020-06-15 17:00:07	2020-07-17 12:52:32	DE002	57	57	1	1	9B5DEA29-188C-4ADC-819B-9F9D988D1362.JPEG	2020-04-19 04:15:00	2020-04-19 04:15:00	2020-04-19 04:15:00	2020	4	19	1	1	EAA9971F-F0A8-44B3-A655-C853B3D5432D.JPEG	2020-04-19 04:15:00	2020-04-19 04:15:00	2020-04-19 04:15:00	2020	4	19
16	CP288	86	Prod	1107	81	2045	23	Klinikum der Universitat Munchen- Grosshadern	DE002	World	9550	Product change TP2	0	5852	APP_PRODUCTCHANGE_TP_2	Product change TP2	19		48595	Baseplate change TP 1	0		185521	26	2020-06-15 17:00:13	2020-06-15 17:00:13	2020-07-17 12:52:32	DE002	58	58	1	1	82AD143B-B212-4B41-A26F-0F9F00E27E94.JPEG	2020-04-21 07:51:00	2020-04-21 07:51:00	2020-04-21 07:51:00	2020	4	21	1	1	4B98AB8B-1A08-4633-AC03-B5B9007D5466.JPEG	2020-04-21 07:51:00	2020-04-21 07:51:00	2020-04-21 07:51:00	2020	4	21
16	CP288	86	Prod	1108	81	2046	23	Klinikum der Universitat Munchen- Grosshadern	DE002	World	9578	Product change TP1	0	5849	APP_PRODUCTCHANGE_TP_1	Product change TP1	17		48654	Baseplate change TP 1	0		132228	1	2020-02-20 12:00:10	2020-02-20 12:00:10	2020-07-17 12:52:32	DE002	0	0	1	1	1FA9CC08-F21A-4A9E-B282-84D15A3DD2A9.JPEG	2020-02-20 11:54:00	2020-02-20 11:54:00	2020-02-20 11:54:00	2020	2	20	1	1	1CCAE483-4095-42A5-A6B0-BDB090826436.JPEG	2020-02-20 12:01:00	2020-02-20 12:01:00	2020-02-20 12:01:00	2020	2	20
16	CP288	86	Prod	1108	81	2046	23	Klinikum der Universitat Munchen- Grosshadern	DE002	World	9581	Product change TP2	0	5852	APP_PRODUCTCHANGE_TP_2	Product change TP2	19		48655	Baseplate change TP 1	0		132230	1	2020-04-01 06:00:06	2020-04-01 06:00:06	2020-07-17 12:52:32	DE002	18	18	1	1	7869011F-3B29-4F45-920D-AA41BEA8DD87.JPEG	2020-04-01 07:08:00	2020-04-01 07:08:00	2020-04-01 07:08:00	2020	4	1	1	1	AD66B6CE-87B4-4E93-90EC-1CB40A08519A.JPEG	2020-04-01 07:27:00	2020-04-01 07:27:00	2020-04-01 07:27:00	2020	4	1
16	CP288	86	Prod	1108	81	2046	23	Klinikum der Universitat Munchen- Grosshadern	DE002	World	9578	Product change TP1	0	5849	APP_PRODUCTCHANGE_TP_1	Product change TP1	17		48654	Baseplate change TP 1	0		152824	2	2020-02-24 08:00:04	2020-02-24 08:00:04	2020-07-17 12:52:32	DE002	1	1	1	1	3EEF10CC-ED76-43D3-A4A5-8791684B45A9.JPEG	2020-02-21 10:30:00	2020-02-21 10:30:00	2020-02-21 10:30:00	2020	2	21	1	1	B2D7E12B-F21E-4D55-85CA-4984A494418F.JPEG	2020-02-21 10:33:00	2020-02-21 10:33:00	2020-02-21 10:33:00	2020	2	21
16	CP288	86	Prod	1108	81	2046	23	Klinikum der Universitat Munchen- Grosshadern	DE002	World	9578	Product change TP1	0	5849	APP_PRODUCTCHANGE_TP_1	Product change TP1	17		48654	Baseplate change TP 1	0		152972	3	2020-02-24 10:00:08	2020-02-24 10:00:08	2020-07-17 12:52:32	DE002	2	2	1	1	DF839068-405E-451D-BD27-0ADCA482A6B5.JPEG	2020-02-24 08:02:00	2020-02-24 08:02:00	2020-02-24 08:02:00	2020	2	24	1	1	D8C4A803-35B2-4F3A-B7A5-49223B910F70.JPEG	2020-02-24 08:07:00	2020-02-24 08:07:00	2020-02-24 08:07:00	2020	2	24
16	CP288	86	Prod	1108	81	2046	23	Klinikum der Universitat Munchen- Grosshadern	DE002	World	9578	Product change TP1	0	5849	APP_PRODUCTCHANGE_TP_1	Product change TP1	17		48654	Baseplate change TP 1	0		153180	4	2020-02-24 20:00:05	2020-02-24 20:00:05	2020-07-17 12:52:32	DE002	3	3	1	1	8537E577-6DF7-472B-BD6C-7897D707993A.JPEG	2020-02-24 19:54:00	2020-02-24 19:54:00	2020-02-24 19:54:00	2020	2	24	1	1	4C82790B-3E37-4826-B0FD-431CFC3F1EFE.JPEG	2020-02-24 19:55:00	2020-02-24 19:55:00	2020-02-24 19:55:00	2020	2	24
16	CP288	86	Prod	1108	81	2046	23	Klinikum der Universitat Munchen- Grosshadern	DE002	World	9578	Product change TP1	0	5849	APP_PRODUCTCHANGE_TP_1	Product change TP1	17		48654	Baseplate change TP 1	0		154877	5	2020-03-01 08:00:26	2020-03-01 08:00:26	2020-07-17 12:52:32	DE002	5	5	1	1	0F7A37F8-D566-4379-917A-98D0BC77CEEC.JPEG	2020-03-01 08:26:00	2020-03-01 08:26:00	2020-03-01 08:26:00	2020	3	1	1	1	91881C5E-0705-45DB-A58B-CD691351E5C7.JPEG	2020-03-01 08:29:00	2020-03-01 08:29:00	2020-03-01 08:29:00	2020	3	1
16	CP288	86	Prod	1108	81	2046	23	Klinikum der Universitat Munchen- Grosshadern	DE002	World	9578	Product change TP1	0	5849	APP_PRODUCTCHANGE_TP_1	Product change TP1	17		48654	Baseplate change TP 1	0		157000	6	2020-03-04 06:00:18	2020-03-04 06:00:18	2020-07-17 12:52:32	DE002	6	6	1	1	4B9CE7B4-DA4F-4590-8DD6-D3DE05E2D956.JPEG	2020-03-04 06:40:00	2020-03-04 06:40:00	2020-03-04 06:40:00	2020	3	4	1	1	ED1A04EF-2935-4E25-BC04-D2AC33AD06E5.JPEG	2020-03-04 06:41:00	2020-03-04 06:41:00	2020-03-04 06:41:00	2020	3	4
16	CP288	86	Prod	1108	81	2046	23	Klinikum der Universitat Munchen- Grosshadern	DE002	World	9578	Product change TP1	0	5849	APP_PRODUCTCHANGE_TP_1	Product change TP1	17		48654	Baseplate change TP 1	0		157942	7	2020-03-06 13:00:05	2020-03-06 13:00:05	2020-07-17 12:52:32	DE002	7	7	1	1	FD4603AD-9C34-4FCC-8311-4D30F5014B50.JPEG	2020-03-06 13:36:00	2020-03-06 13:36:00	2020-03-06 13:36:00	2020	3	6	1	1	CD4ADE4E-819D-4FE9-98F5-DC7CAAE27C40.JPEG	2020-03-06 13:36:00	2020-03-06 13:36:00	2020-03-06 13:36:00	2020	3	6
16	CP288	86	Prod	1108	81	2046	23	Klinikum der Universitat Munchen- Grosshadern	DE002	World	9578	Product change TP1	0	5849	APP_PRODUCTCHANGE_TP_1	Product change TP1	17		48654	Baseplate change TP 1	0		158123	8	2020-03-09 07:00:18	2020-03-09 07:00:18	2020-07-17 12:52:32	DE002	8	8	1	1	E2BC2550-BCB2-422E-B398-032273204982.JPEG	2020-03-09 07:06:00	2020-03-09 07:06:00	2020-03-09 07:06:00	2020	3	9	1	1	92831E0F-3B12-4133-8DC4-28AF3F7E925C.JPEG	2020-03-09 07:06:00	2020-03-09 07:06:00	2020-03-09 07:06:00	2020	3	9
16	CP288	86	Prod	1108	81	2046	23	Klinikum der Universitat Munchen- Grosshadern	DE002	World	9578	Product change TP1	0	5849	APP_PRODUCTCHANGE_TP_1	Product change TP1	17		48654	Baseplate change TP 1	0		158400	9	2020-03-11 07:00:13	2020-03-11 07:00:13	2020-07-17 12:52:32	DE002	9	9	1	1	A7D388D9-5341-42AC-B1BE-9639E241D586.JPEG	2020-03-11 06:32:00	2020-03-11 06:32:00	2020-03-11 06:32:00	2020	3	11	1	1	AAE782E2-4BCA-4EDE-A17F-B90D538B12F1.JPEG	2020-03-11 06:33:00	2020-03-11 06:33:00	2020-03-11 06:33:00	2020	3	11
16	CP288	86	Prod	1108	81	2046	23	Klinikum der Universitat Munchen- Grosshadern	DE002	World	9578	Product change TP1	0	5849	APP_PRODUCTCHANGE_TP_1	Product change TP1	17		48654	Baseplate change TP 1	0		160025	10	2020-03-17 06:00:20	2020-03-17 06:00:20	2020-07-17 12:52:32	DE002	11	11	1	1	30DCF340-9E6D-477B-BEC7-CE27C9F991D1.JPEG	2020-03-17 06:29:00	2020-03-17 06:29:00	2020-03-17 06:29:00	2020	3	17	1	1	274DDC74-3195-4CD1-BC2B-7B9154FB3176.JPEG	2020-03-17 06:31:00	2020-03-17 06:31:00	2020-03-17 06:31:00	2020	3	17
16	CP288	86	Prod	1108	81	2046	23	Klinikum der Universitat Munchen- Grosshadern	DE002	World	9578	Product change TP1	0	5849	APP_PRODUCTCHANGE_TP_1	Product change TP1	17		48654	Baseplate change TP 1	0		162264	11	2020-03-20 08:00:10	2020-03-20 08:00:10	2020-07-17 12:52:32	DE002	12	12	1	1	5456CC1B-EE92-41A6-BB18-10A256B1DDC9.JPEG	2020-03-20 07:51:00	2020-03-20 07:51:00	2020-03-20 07:51:00	2020	3	20	1	1	10A1A475-9FF4-45B2-BD86-0FCC0122B136.JPEG	2020-03-20 07:52:00	2020-03-20 07:52:00	2020-03-20 07:52:00	2020	3	20
16	CP288	86	Prod	1108	81	2046	23	Klinikum der Universitat Munchen- Grosshadern	DE002	World	9578	Product change TP1	0	5849	APP_PRODUCTCHANGE_TP_1	Product change TP1	17		48654	Baseplate change TP 1	0		162753	12	2020-03-22 08:00:12	2020-03-22 08:00:12	2020-07-17 12:52:32	DE002	13	13	1	1	67C160CE-08BA-4D3D-AD66-1D7582707BC6.JPEG	2020-03-22 08:04:00	2020-03-22 08:04:00	2020-03-22 08:04:00	2020	3	22	1	1	569CADAE-6238-4F38-B8A3-452CB77E6795.JPEG	2020-03-22 08:05:00	2020-03-22 08:05:00	2020-03-22 08:05:00	2020	3	22
16	CP288	86	Prod	1108	81	2046	23	Klinikum der Universitat Munchen- Grosshadern	DE002	World	9578	Product change TP1	0	5849	APP_PRODUCTCHANGE_TP_1	Product change TP1	17		48654	Baseplate change TP 1	0		163440	13	2020-03-24 08:00:27	2020-03-24 08:00:27	2020-07-17 12:52:32	DE002	14	14	1	1	441C661D-4AD3-497B-B579-09969DC2F378.JPEG	2020-03-24 07:58:00	2020-03-24 07:58:00	2020-03-24 07:58:00	2020	3	24	1	1	0DBE8127-6940-4ECD-9400-D3F5070E4E8B.JPEG	2020-03-24 08:04:00	2020-03-24 08:04:00	2020-03-24 08:04:00	2020	3	24
16	CP288	86	Prod	1108	81	2046	23	Klinikum der Universitat Munchen- Grosshadern	DE002	World	9578	Product change TP1	0	5849	APP_PRODUCTCHANGE_TP_1	Product change TP1	17		48654	Baseplate change TP 1	0		163877	14	2020-03-26 08:00:20	2020-03-26 08:00:20	2020-07-17 12:52:32	DE002	15	15	1	1	55758893-442B-428E-8D42-918D1DA1EA9A.JPEG	2020-03-26 07:05:00	2020-03-26 07:05:00	2020-03-26 07:05:00	2020	3	26	1	1	958784D9-3DE7-4823-981A-3404976D8C25.JPEG	2020-03-26 08:06:00	2020-03-26 08:06:00	2020-03-26 08:06:00	2020	3	26
16	CP288	86	Prod	1108	81	2046	23	Klinikum der Universitat Munchen- Grosshadern	DE002	World	9578	Product change TP1	0	5849	APP_PRODUCTCHANGE_TP_1	Product change TP1	17		48654	Baseplate change TP 1	0		165253	15	2020-03-31 16:00:04	2020-03-31 16:00:04	2020-07-17 12:52:32	DE002	16	16	1	1	F01C5F63-09E3-4FF9-AEC3-3536D5FE33A1.JPEG	2020-03-29 08:45:00	2020-03-29 08:45:00	2020-03-29 08:45:00	2020	3	29	1	1	1C277DCC-1E29-4975-915B-C7BF7FA16A74.JPEG	2020-03-29 09:08:00	2020-03-29 09:08:00	2020-03-29 09:08:00	2020	3	29
16	CP288	86	Prod	1108	81	2046	23	Klinikum der Universitat Munchen- Grosshadern	DE002	World	9581	Product change TP2	0	5852	APP_PRODUCTCHANGE_TP_2	Product change TP2	19		48655	Baseplate change TP 1	0		168770	2	2020-04-05 11:00:05	2020-04-05 11:00:05	2020-07-17 12:52:32	DE002	19	19	1	1	482AD975-2DE0-4542-99C8-8A55C6504ED2.JPEG	2020-04-04 07:05:00	2020-04-04 07:05:00	2020-04-04 07:05:00	2020	4	4	1	1	8C755882-143E-42C2-AFD6-953098ACDD7C.JPEG	2020-04-04 07:22:00	2020-04-04 07:22:00	2020-04-04 07:22:00	2020	4	4
16	CP288	86	Prod	1108	81	2046	23	Klinikum der Universitat Munchen- Grosshadern	DE002	World	9581	Product change TP2	0	5852	APP_PRODUCTCHANGE_TP_2	Product change TP2	19		48655	Baseplate change TP 1	0		168850	3	2020-04-06 06:00:07	2020-04-06 06:00:07	2020-07-17 12:52:32	DE002	20	20	1	1	53F3EFB5-BF42-401E-9943-876608189BE1.JPEG	2020-04-05 13:03:00	2020-04-05 13:03:00	2020-04-05 13:03:00	2020	4	5	1	1	861AF995-7B4F-46D3-9BF0-0DE4D328CBA2.JPEG	2020-04-05 13:06:00	2020-04-05 13:06:00	2020-04-05 13:06:00	2020	4	5
16	CP288	86	Prod	1108	81	2046	23	Klinikum der Universitat Munchen- Grosshadern	DE002	World	9581	Product change TP2	0	5852	APP_PRODUCTCHANGE_TP_2	Product change TP2	19		48655	Baseplate change TP 1	0		168883	4	2020-04-06 13:00:05	2020-04-06 13:00:05	2020-07-17 12:52:32	DE002	21	21	1	1	E96298FF-4434-4C42-A1E8-A8E7756133CB.JPEG	2020-04-06 07:23:00	2020-04-06 07:23:00	2020-04-06 07:23:00	2020	4	6	1	1	2C9E43E2-FD10-40B5-A21C-F6E29F4A3B7D.JPEG	2020-04-06 07:49:00	2020-04-06 07:49:00	2020-04-06 07:49:00	2020	4	6
16	CP288	86	Prod	1108	81	2046	23	Klinikum der Universitat Munchen- Grosshadern	DE002	World	9581	Product change TP2	0	5852	APP_PRODUCTCHANGE_TP_2	Product change TP2	19		48655	Baseplate change TP 1	0		168886	5	2020-04-06 13:00:09	2020-04-06 13:00:09	2020-07-17 12:52:32	DE002	22	22	1	1	B46196C5-500E-4B7A-A2CE-FD918FABE696.JPEG	2020-04-06 14:28:00	2020-04-06 14:28:00	2020-04-06 14:28:00	2020	4	6	1	1	94ABB6AE-B3D5-466B-9A04-31ABA428A996.JPEG	2020-04-06 14:29:00	2020-04-06 14:29:00	2020-04-06 14:29:00	2020	4	6
16	CP288	86	Prod	1108	81	2046	23	Klinikum der Universitat Munchen- Grosshadern	DE002	World	9581	Product change TP2	0	5852	APP_PRODUCTCHANGE_TP_2	Product change TP2	19		48655	Baseplate change TP 1	0		169176	6	2020-04-08 05:00:08	2020-04-08 05:00:08	2020-07-17 12:52:32	DE002	23	23	1	1	4B6D363F-5300-4244-A82B-940DABA5EC32.JPEG	2020-04-08 06:31:00	2020-04-08 06:31:00	2020-04-08 06:31:00	2020	4	8	1	1	FEFF5094-256D-4673-AFA6-F632C5C49131.JPEG	2020-04-08 06:46:00	2020-04-08 06:46:00	2020-04-08 06:46:00	2020	4	8
16	CP288	86	Prod	1108	81	2046	23	Klinikum der Universitat Munchen- Grosshadern	DE002	World	9581	Product change TP2	0	5852	APP_PRODUCTCHANGE_TP_2	Product change TP2	19		48655	Baseplate change TP 1	0		169442	7	2020-04-11 09:00:19	2020-04-11 09:00:19	2020-07-17 12:52:32	DE002	24	24	1	1	F5EEAA5F-D613-4036-A2E5-E0E17BCCE08E.JPEG	2020-04-10 07:14:00	2020-04-10 07:14:00	2020-04-10 07:14:00	2020	4	10	1	1	B607197F-6047-4AAA-AFC2-4FE9C021F5F0.JPEG	2020-04-10 09:57:00	2020-04-10 09:57:00	2020-04-10 09:57:00	2020	4	10
16	CP288	86	Prod	1108	81	2046	23	Klinikum der Universitat Munchen- Grosshadern	DE002	World	9581	Product change TP2	0	5852	APP_PRODUCTCHANGE_TP_2	Product change TP2	19		48655	Baseplate change TP 1	0		169445	8	2020-04-11 09:00:27	2020-04-11 09:00:27	2020-07-17 12:52:32	DE002	25	25	1	1	7C22149E-1F13-48A1-9C7C-C391AF2D176F.JPEG	2020-04-11 10:14:00	2020-04-11 10:14:00	2020-04-11 10:14:00	2020	4	11	1	1	08180424-5AF1-423D-897F-E76BB01E29BE.JPEG	2020-04-11 10:19:00	2020-04-11 10:19:00	2020-04-11 10:19:00	2020	4	11
16	CP288	86	Prod	1108	81	2046	23	Klinikum der Universitat Munchen- Grosshadern	DE002	World	9581	Product change TP2	0	5852	APP_PRODUCTCHANGE_TP_2	Product change TP2	19		48655	Baseplate change TP 1	0		169561	9	2020-04-13 07:00:15	2020-04-13 07:00:15	2020-07-17 12:52:32	DE002	26	26	1	1	B5295DA5-CD66-43F5-A074-C871D777F081.JPEG	2020-04-13 07:43:00	2020-04-13 07:43:00	2020-04-13 07:43:00	2020	4	13	1	1	B6AEFABF-8AB4-4B6F-BC63-2501008701CC.JPEG	2020-04-13 07:44:00	2020-04-13 07:44:00	2020-04-13 07:44:00	2020	4	13
16	CP288	86	Prod	1108	81	2046	23	Klinikum der Universitat Munchen- Grosshadern	DE002	World	9581	Product change TP2	0	5852	APP_PRODUCTCHANGE_TP_2	Product change TP2	19		48655	Baseplate change TP 1	0		170029	10	2020-04-15 11:00:05	2020-04-15 11:00:05	2020-07-17 12:52:32	DE002	27	27	1	1	5C28BDAB-A11F-4B5C-8EF8-ACF00C70CD1C.JPEG	2020-04-15 06:54:00	2020-04-15 06:54:00	2020-04-15 06:54:00	2020	4	15	1	1	2DD637F9-01DF-4FBC-83EC-26C018F66D3C.JPEG	2020-04-15 12:46:00	2020-04-15 12:46:00	2020-04-15 12:46:00	2020	4	15
16	CP288	86	Prod	1108	81	2046	23	Klinikum der Universitat Munchen- Grosshadern	DE002	World	9581	Product change TP2	0	5852	APP_PRODUCTCHANGE_TP_2	Product change TP2	19		48655	Baseplate change TP 1	0		170502	11	2020-04-17 06:00:20	2020-04-17 06:00:20	2020-07-17 12:52:32	DE002	28	28	1	1	4E958BB2-9DD5-44E6-BBE3-BA31C3C1EC40.JPEG	2020-04-17 06:51:00	2020-04-17 06:51:00	2020-04-17 06:51:00	2020	4	17	1	1	67A186EF-684C-436A-B6C2-147B8C08D525.JPEG	2020-04-17 07:00:00	2020-04-17 07:00:00	2020-04-17 07:00:00	2020	4	17
16	CP288	86	Prod	1108	81	2046	23	Klinikum der Universitat Munchen- Grosshadern	DE002	World	9581	Product change TP2	0	5852	APP_PRODUCTCHANGE_TP_2	Product change TP2	19		48655	Baseplate change TP 1	0		171657	12	2020-04-22 06:00:06	2020-04-22 06:00:06	2020-07-17 12:52:32	DE002	29	29	1	1	B5DBA2D2-B4F9-42B6-B068-B18A86321E94.JPEG	2020-04-20 06:31:00	2020-04-20 06:31:00	2020-04-20 06:31:00	2020	4	20	1	1	DB47357D-C32D-4502-B76E-8EEC9CAEFD0A.JPEG	2020-04-20 17:04:00	2020-04-20 17:04:00	2020-04-20 17:04:00	2020	4	20
16	CP288	86	Prod	1108	81	2046	23	Klinikum der Universitat Munchen- Grosshadern	DE002	World	9581	Product change TP2	0	5852	APP_PRODUCTCHANGE_TP_2	Product change TP2	19		48655	Baseplate change TP 1	0		171695	13	2020-04-22 07:00:20	2020-04-22 07:00:20	2020-07-17 12:52:32	DE002	30	30	1	1	E4C9863A-5325-476F-844C-8E1D86B6BDC0.JPEG	2020-04-22 07:40:00	2020-04-22 07:40:00	2020-04-22 07:40:00	2020	4	22	1	1	CA7648F7-F7D0-4502-A213-71FCC23B1D06.JPEG	2020-04-22 08:17:00	2020-04-22 08:17:00	2020-04-22 08:17:00	2020	4	22
16	CP288	86	Prod	1108	81	2046	23	Klinikum der Universitat Munchen- Grosshadern	DE002	World	9581	Product change TP2	0	5852	APP_PRODUCTCHANGE_TP_2	Product change TP2	19		48655	Baseplate change TP 1	0		172340	14	2020-04-24 06:00:05	2020-04-24 06:00:05	2020-07-17 12:52:32	DE002	31	31	1	1	07929D74-497E-41B7-80EE-8DEAD62FA9BF.JPEG	2020-04-24 07:08:00	2020-04-24 07:08:00	2020-04-24 07:08:00	2020	4	24	1	1	B80E027D-18EA-456F-B98A-7ECD39FF2516.JPEG	2020-04-24 07:36:00	2020-04-24 07:36:00	2020-04-24 07:36:00	2020	4	24
16	CP288	86	Prod	1108	81	2046	23	Klinikum der Universitat Munchen- Grosshadern	DE002	World	9581	Product change TP2	0	5852	APP_PRODUCTCHANGE_TP_2	Product change TP2	19		48655	Baseplate change TP 1	0		172492	15	2020-04-26 06:00:26	2020-04-26 06:00:26	2020-07-17 12:52:32	DE002	32	32	1	1	CD3C73B2-45EE-4972-AE1C-C5974D819E68.JPEG	2020-04-26 06:52:00	2020-04-26 06:52:00	2020-04-26 06:52:00	2020	4	26	1	1	A409FC3B-9FDD-4DA1-8347-5DE62F7215BE.JPEG	2020-04-26 07:29:00	2020-04-26 07:29:00	2020-04-26 07:29:00	2020	4	26
16	CP288	86	Prod	1108	81	2046	23	Klinikum der Universitat Munchen- Grosshadern	DE002	World	9581	Product change TP2	0	5852	APP_PRODUCTCHANGE_TP_2	Product change TP2	19		48655	Baseplate change TP 1	0		172671	16	2020-04-28 06:00:12	2020-04-28 06:00:12	2020-07-17 12:52:32	DE002	33	33	1	1	69379D55-0161-49AC-8244-B7BD9368231F.JPEG	2020-04-28 06:32:00	2020-04-28 06:32:00	2020-04-28 06:32:00	2020	4	28	1	1	9CC5D479-4D5F-4DAB-B45E-A8B46A0EEFB4.JPEG	2020-04-28 07:12:00	2020-04-28 07:12:00	2020-04-28 07:12:00	2020	4	28
16	CP288	86	Prod	1108	81	2046	23	Klinikum der Universitat Munchen- Grosshadern	DE002	World	9581	Product change TP2	0	5852	APP_PRODUCTCHANGE_TP_2	Product change TP2	19		48655	Baseplate change TP 1	0		173428	17	2020-04-30 09:00:05	2020-04-30 09:00:05	2020-07-17 12:52:32	DE002	34	34	1	1	DCCA92C2-F7DB-4B06-8BC4-B728FEED1337.JPEG	2020-04-30 08:03:00	2020-04-30 08:03:00	2020-04-30 08:03:00	2020	4	30	1	1	B0EEE8D5-AF14-4DB5-93C7-37EA9B2E87A8.JPEG	2020-04-30 08:03:00	2020-04-30 08:03:00	2020-04-30 08:03:00	2020	4	30
16	CP288	86	Prod	1108	81	2046	23	Klinikum der Universitat Munchen- Grosshadern	DE002	World	9581	Product change TP2	0	5852	APP_PRODUCTCHANGE_TP_2	Product change TP2	19		48655	Baseplate change TP 1	0		173726	18	2020-05-02 06:00:20	2020-05-02 06:00:20	2020-07-17 12:52:32	DE002	35	35	1	1	6193DF16-A814-4DF8-B8ED-F14A28D4F478.JPEG	2020-05-02 07:50:00	2020-05-02 07:50:00	2020-05-02 07:50:00	2020	5	2	1	1	E62B233F-8A1A-48FC-9411-EDD95C1AFF47.JPEG	2020-05-02 07:52:00	2020-05-02 07:52:00	2020-05-02 07:52:00	2020	5	2
16	CP288	86	Prod	1108	81	2046	23	Klinikum der Universitat Munchen- Grosshadern	DE002	World	9581	Product change TP2	0	5852	APP_PRODUCTCHANGE_TP_2	Product change TP2	19		48655	Baseplate change TP 1	0		174084	19	2020-05-06 05:00:12	2020-05-06 05:00:12	2020-07-17 12:52:32	DE002	36	36	1	1	D8FD4D0B-0583-4D29-B0F4-DC798E4C08FF.JPEG	2020-05-04 07:08:00	2020-05-04 07:08:00	2020-05-04 07:08:00	2020	5	4	1	1	52B46BDE-AC2D-42C2-A9A0-15A75C732226.JPEG	2020-05-04 07:08:00	2020-05-04 07:08:00	2020-05-04 07:08:00	2020	5	4
16	CP288	86	Prod	1108	81	2046	23	Klinikum der Universitat Munchen- Grosshadern	DE002	World	9581	Product change TP2	0	5852	APP_PRODUCTCHANGE_TP_2	Product change TP2	19		48655	Baseplate change TP 1	0		174087	20	2020-05-06 05:00:15	2020-05-06 05:00:15	2020-07-17 12:52:32	DE002	37	37	1	1	C30BDAF7-8A67-435B-926B-B7C8882CAE65.JPEG	2020-05-06 06:31:00	2020-05-06 06:31:00	2020-05-06 06:31:00	2020	5	6	1	1	F00DC98B-4E28-4BB8-9CCF-90B8A2090F06.JPEG	2020-05-06 06:41:00	2020-05-06 06:41:00	2020-05-06 06:41:00	2020	5	6
16	CP288	86	Prod	1108	81	2046	23	Klinikum der Universitat Munchen- Grosshadern	DE002	World	9581	Product change TP2	0	5852	APP_PRODUCTCHANGE_TP_2	Product change TP2	19		48655	Baseplate change TP 1	0		174531	21	2020-05-08 06:01:12	2020-05-08 06:01:12	2020-07-17 12:52:32	DE002	38	38	1	1	A0DB0F2D-E579-4717-B804-ADCA1B47D1FB.JPEG	2020-05-08 06:16:00	2020-05-08 06:16:00	2020-05-08 06:16:00	2020	5	8	1	1	DAD8A0DF-AA40-4E63-92ED-245484546DF8.JPEG	2020-05-08 06:16:00	2020-05-08 06:16:00	2020-05-08 06:16:00	2020	5	8
16	CP288	86	Prod	1108	81	2046	23	Klinikum der Universitat Munchen- Grosshadern	DE002	World	9581	Product change TP2	0	5852	APP_PRODUCTCHANGE_TP_2	Product change TP2	19		48655	Baseplate change TP 1	0		174657	22	2020-05-10 07:00:07	2020-05-10 07:00:07	2020-07-17 12:52:32	DE002	39	39	1	1	EB8DBECF-BA45-45D0-8DD0-EF4E91EB7FA3.JPEG	2020-05-10 07:32:00	2020-05-10 07:32:00	2020-05-10 07:32:00	2020	5	10	1	1	53C4C047-6D47-41E9-8B19-F062004D1E8C.JPEG	2020-05-10 08:36:00	2020-05-10 08:36:00	2020-05-10 08:36:00	2020	5	10
16	CP288	86	Prod	1108	81	2046	23	Klinikum der Universitat Munchen- Grosshadern	DE002	World	9581	Product change TP2	0	5852	APP_PRODUCTCHANGE_TP_2	Product change TP2	19		48655	Baseplate change TP 1	0		175498	23	2020-05-12 18:00:07	2020-05-12 18:00:07	2020-07-17 12:52:32	DE002	40	40	1	1	E4E5F1E2-E167-4868-A8E3-D320BE9C77D3.JPEG	2020-05-12 07:48:00	2020-05-12 07:48:00	2020-05-12 07:48:00	2020	5	12	1	1	70038EE2-2BFD-48B8-8443-C3F477779C3C.JPEG	2020-05-12 08:09:00	2020-05-12 08:09:00	2020-05-12 08:09:00	2020	5	12
16	CP288	86	Prod	1109	81	2047	23	Klinikum der Universitat Munchen- Grosshadern	DE002	World	9609	Product change TP1	0	5849	APP_PRODUCTCHANGE_TP_1	Product change TP1	17		48714	Baseplate change TP 1	0		132339	1	2020-02-24 16:00:04	2020-02-24 16:00:04	2020-07-17 12:52:32	DE002	0	0	1	1	5ADE247F-8A24-4C40-B035-AF831448546E.JPEG	2020-02-24 14:45:00	2020-02-24 14:45:00	2020-02-24 14:45:00	2020	2	24	1	1	CA8078BD-2C94-4CF4-8D6F-77618092110E.JPEG	2020-02-24 14:49:00	2020-02-24 14:49:00	2020-02-24 14:49:00	2020	2	24
16	CP288	86	Prod	1109	81	2047	23	Klinikum der Universitat Munchen- Grosshadern	DE002	World	9609	Product change TP1	0	5849	APP_PRODUCTCHANGE_TP_1	Product change TP1	17		48714	Baseplate change TP 1	0		153158	2	2020-02-24 16:00:20	2020-02-24 16:00:20	2020-07-17 12:52:32	DE002	1	1	1	1	FE251DF7-F0C8-4C6B-A7D0-11EA2AC7B975.JPEG	2020-02-24 16:08:00	2020-02-24 16:08:00	2020-02-24 16:08:00	2020	2	24	1	1	E3DA3ACF-92DF-4BD5-B191-C3B193A0B021.JPEG	2020-02-24 16:08:00	2020-02-24 16:08:00	2020-02-24 16:08:00	2020	2	24
16	CP288	86	Prod	1109	81	2047	23	Klinikum der Universitat Munchen- Grosshadern	DE002	World	9609	Product change TP1	0	5849	APP_PRODUCTCHANGE_TP_1	Product change TP1	17		48714	Baseplate change TP 1	0		153203	3	2020-02-25 02:00:37	2020-02-25 02:00:37	2020-07-17 12:52:32	DE002	2	2	1	1	0FFFE40D-594B-4627-98E3-4906B021CCF6.JPEG	2020-02-25 02:10:00	2020-02-25 02:10:00	2020-02-25 02:10:00	2020	2	25	1	1	5D72170D-C251-454D-A970-61446931A7B8.JPEG	2020-02-25 02:11:00	2020-02-25 02:11:00	2020-02-25 02:11:00	2020	2	25
16	CP288	86	Prod	1109	81	2047	23	Klinikum der Universitat Munchen- Grosshadern	DE002	World	9609	Product change TP1	0	5849	APP_PRODUCTCHANGE_TP_1	Product change TP1	17		48714	Baseplate change TP 1	0		154250	4	2020-02-25 14:00:06	2020-02-25 14:00:06	2020-07-17 12:52:32	DE002	3	3	1	1	C32918BE-7456-4FBA-9463-F935531CA91C.JPEG	2020-02-25 14:26:00	2020-02-25 14:26:00	2020-02-25 14:26:00	2020	2	25	1	1	B5C84AD6-BFFE-43F9-8856-F4DC26E881B0.JPEG	2020-02-25 14:27:00	2020-02-25 14:27:00	2020-02-25 14:27:00	2020	2	25
16	CP288	86	Prod	1109	81	2047	23	Klinikum der Universitat Munchen- Grosshadern	DE002	World	9609	Product change TP1	0	5849	APP_PRODUCTCHANGE_TP_1	Product change TP1	17		48714	Baseplate change TP 1	0		154296	5	2020-02-26 00:00:06	2020-02-26 00:00:06	2020-07-17 12:52:32	DE002	4	4	1	1	B6C579B8-1BE5-4088-AD0F-6DD24E5D0AE1.JPEG	2020-02-26 00:35:00	2020-02-26 00:35:00	2020-02-26 00:35:00	2020	2	26	1	1	B856E86B-3333-4B08-AD09-1978A85B70B5.JPEG	2020-02-26 00:35:00	2020-02-26 00:35:00	2020-02-26 00:35:00	2020	2	26
16	CP288	86	Prod	1109	81	2047	23	Klinikum der Universitat Munchen- Grosshadern	DE002	World	9609	Product change TP1	0	5849	APP_PRODUCTCHANGE_TP_1	Product change TP1	17		48714	Baseplate change TP 1	0		154534	6	2020-02-26 20:00:04	2020-02-26 20:00:04	2020-07-17 12:52:32	DE002	5	5	1	1	77DFC109-4828-42EB-B1D8-2C8A33C62AE6.JPEG	2020-02-26 14:18:00	2020-02-26 14:18:00	2020-02-26 14:18:00	2020	2	26	1	1	F28815FA-60AA-4B38-AF49-608EF9A1EFF7.JPEG	2020-02-26 14:19:00	2020-02-26 14:19:00	2020-02-26 14:19:00	2020	2	26
16	CP288	86	Prod	1114	80	2072	24	Sanitätshaus Fürst GmbH	DE003	World	9764	Product change TP1	0	5849	APP_PRODUCTCHANGE_TP_1	Product change TP1	17		49014	Baseplate change TP 1	0		132708	1	2020-02-04 08:00:26	2020-02-04 08:00:26	2020-07-17 12:52:32	DE003	0	0	1	1	9B9A1174-5E83-49D9-9090-5858AA9A85F2.JPEG	2020-02-04 08:11:00	2020-02-04 08:11:00	2020-02-04 08:11:00	2020	2	4	1	1	09EAA838-E21E-4CAE-8EE5-50AE8133FCEF.JPEG	2020-02-04 08:11:00	2020-02-04 08:11:00	2020-02-04 08:11:00	2020	2	4
16	CP288	86	Prod	1114	80	2072	24	Sanitätshaus Fürst GmbH	DE003	World	9764	Product change TP1	0	5849	APP_PRODUCTCHANGE_TP_1	Product change TP1	17		49014	Baseplate change TP 1	0		144924	2	2020-02-06 08:00:07	2020-02-06 08:00:07	2020-07-17 12:52:32	DE003	1	1	1	1	CC05BB86-EDE4-4596-900B-A6E1F3E5210B.JPEG	2020-02-05 08:17:00	2020-02-05 08:17:00	2020-02-05 08:17:00	2020	2	5	1	1	BAA03F38-62CD-40DB-81E2-EE3A03CAFBEF.JPEG	2020-02-05 08:19:00	2020-02-05 08:19:00	2020-02-05 08:19:00	2020	2	5
16	CP288	86	Prod	1114	80	2072	24	Sanitätshaus Fürst GmbH	DE003	World	9764	Product change TP1	0	5849	APP_PRODUCTCHANGE_TP_1	Product change TP1	17		49014	Baseplate change TP 1	0		144927	3	2020-02-06 09:00:04	2020-02-06 09:00:04	2020-07-17 12:52:32	DE003	2	2	1	1	1C78FED7-26FD-44D7-934E-E7D5AC854C8B.JPEG	2020-02-06 08:27:00	2020-02-06 08:27:00	2020-02-06 08:27:00	2020	2	6	1	1	5034D3A3-7255-4774-A47D-835A8AEEBA8D.JPEG	2020-02-06 08:27:00	2020-02-06 08:27:00	2020-02-06 08:27:00	2020	2	6
16	CP288	86	Prod	1114	80	2072	24	Sanitätshaus Fürst GmbH	DE003	World	9764	Product change TP1	0	5849	APP_PRODUCTCHANGE_TP_1	Product change TP1	17		49014	Baseplate change TP 1	0		146012	4	2020-02-08 07:00:32	2020-02-08 07:00:32	2020-07-17 12:52:32	DE003	3	3	1	1	8CE75629-32C7-4989-A749-B7358D36B12E.JPEG	2020-02-07 08:09:00	2020-02-07 08:09:00	2020-02-07 08:09:00	2020	2	7	1	1	9EFE9E1C-8540-44DC-8413-C7A5C6A88215.JPEG	2020-02-07 08:10:00	2020-02-07 08:10:00	2020-02-07 08:10:00	2020	2	7
16	CP288	86	Prod	1114	80	2072	24	Sanitätshaus Fürst GmbH	DE003	World	9764	Product change TP1	0	5849	APP_PRODUCTCHANGE_TP_1	Product change TP1	17		49014	Baseplate change TP 1	0		146107	5	2020-02-11 07:00:06	2020-02-11 07:00:06	2020-07-17 12:52:32	DE003	4	4	1	1	17147BED-D77C-4D4A-A137-B1094EC9C39B.JPEG	2020-02-08 07:36:00	2020-02-08 07:36:00	2020-02-08 07:36:00	2020	2	8	1	1	64991947-9A55-495A-A64D-201592C929D1.JPEG	2020-02-08 07:36:00	2020-02-08 07:36:00	2020-02-08 07:36:00	2020	2	8
16	CP288	86	Prod	1114	80	2072	24	Sanitätshaus Fürst GmbH	DE003	World	9764	Product change TP1	0	5849	APP_PRODUCTCHANGE_TP_1	Product change TP1	17		49014	Baseplate change TP 1	0		146113	6	2020-02-11 08:00:07	2020-02-11 08:00:07	2020-07-17 12:52:32	DE003	5	5	1	1	5A72C29F-AA28-4E06-BC33-FC103EE7124C.JPEG	2020-02-10 08:26:00	2020-02-10 08:26:00	2020-02-10 08:26:00	2020	2	10	1	1	A6BCABC3-4C0C-4F05-8044-B3FAD49362AB.JPEG	2020-02-10 08:27:00	2020-02-10 08:27:00	2020-02-10 08:27:00	2020	2	10
16	CP288	86	Prod	1114	80	2072	24	Sanitätshaus Fürst GmbH	DE003	World	9764	Product change TP1	0	5849	APP_PRODUCTCHANGE_TP_1	Product change TP1	17		49014	Baseplate change TP 1	0		146116	7	2020-02-11 08:00:13	2020-02-11 08:00:13	2020-07-17 12:52:32	DE003	6	6	1	1	8A378D6C-8BBD-4EE1-A781-0CABC238164D.JPEG	2020-02-11 07:59:00	2020-02-11 07:59:00	2020-02-11 07:59:00	2020	2	11	1	1	20825D9F-6BEC-4AED-BB4F-25158252A85D.JPEG	2020-02-11 08:00:00	2020-02-11 08:00:00	2020-02-11 08:00:00	2020	2	11
16	CP288	86	Prod	1114	80	2072	24	Sanitätshaus Fürst GmbH	DE003	World	9764	Product change TP1	0	5849	APP_PRODUCTCHANGE_TP_1	Product change TP1	17		49014	Baseplate change TP 1	0		146527	8	2020-02-16 08:00:13	2020-02-16 08:00:13	2020-07-17 12:52:32	DE003	10	10	1	1	45DC1F93-F02C-4A06-BC8C-D97C618E8F2D.JPEG	2020-02-15 07:36:00	2020-02-15 07:36:00	2020-02-15 07:36:00	2020	2	15	1	1	F47D4E04-3A75-4A03-93C9-48CD235CF0D4.JPEG	2020-02-15 07:36:00	2020-02-15 07:36:00	2020-02-15 07:36:00	2020	2	15
16	CP288	86	Prod	1114	80	2072	24	Sanitätshaus Fürst GmbH	DE003	World	9764	Product change TP1	0	5849	APP_PRODUCTCHANGE_TP_1	Product change TP1	17		49014	Baseplate change TP 1	0		146530	9	2020-02-16 08:00:25	2020-02-16 08:00:25	2020-07-17 12:52:32	DE003	7	7	1	1	818511C0-0C2C-4D8C-9A0E-8B9F14D615C3.JPEG	2020-02-12 08:55:00	2020-02-12 08:55:00	2020-02-12 08:55:00	2020	2	12	1	1	19CA7769-224B-48A2-8B5A-EC6F3643820C.JPEG	2020-02-12 08:55:00	2020-02-12 08:55:00	2020-02-12 08:55:00	2020	2	12
16	CP288	86	Prod	1114	80	2072	24	Sanitätshaus Fürst GmbH	DE003	World	9764	Product change TP1	0	5849	APP_PRODUCTCHANGE_TP_1	Product change TP1	17		49014	Baseplate change TP 1	0		146533	10	2020-02-16 08:00:28	2020-02-16 08:00:28	2020-07-17 12:52:32	DE003	8	8	1	1	A5D136E4-EB00-4501-9C3E-B4403A9AE7CF.JPEG	2020-02-13 08:04:00	2020-02-13 08:04:00	2020-02-13 08:04:00	2020	2	13	1	1	DB6BEAFA-0141-431E-9D03-29B652CBA34D.JPEG	2020-02-13 08:05:00	2020-02-13 08:05:00	2020-02-13 08:05:00	2020	2	13
16	CP288	86	Prod	1114	80	2072	24	Sanitätshaus Fürst GmbH	DE003	World	9764	Product change TP1	0	5849	APP_PRODUCTCHANGE_TP_1	Product change TP1	17		49014	Baseplate change TP 1	0		146539	11	2020-02-16 09:00:06	2020-02-16 09:00:06	2020-07-17 12:52:32	DE003	9	9	1	1	C8CBC591-39F5-4433-B126-C1DE01E1D069.JPEG	2020-02-14 07:41:00	2020-02-14 07:41:00	2020-02-14 07:41:00	2020	2	14	1	1	68D68092-6039-42D4-BA04-226AC523F88D.JPEG	2020-02-14 07:41:00	2020-02-14 07:41:00	2020-02-14 07:41:00	2020	2	14
16	CP288	86	Prod	1114	80	2072	24	Sanitätshaus Fürst GmbH	DE003	World	9764	Product change TP1	0	5849	APP_PRODUCTCHANGE_TP_1	Product change TP1	17		49014	Baseplate change TP 1	0		149936	12	2020-02-19 09:00:11	2020-02-19 09:00:11	2020-07-17 12:52:32	DE003	11	11	1	1	713BDB14-1FFE-4C64-8481-D6E394B1CB20.JPEG	2020-02-16 08:13:00	2020-02-16 08:13:00	2020-02-16 08:13:00	2020	2	16	1	1	F6FF3248-37DE-48C9-8A35-D9127E4B803F.JPEG	2020-02-16 08:13:00	2020-02-16 08:13:00	2020-02-16 08:13:00	2020	2	16
16	CP288	86	Prod	1114	80	2072	24	Sanitätshaus Fürst GmbH	DE003	World	9764	Product change TP1	0	5849	APP_PRODUCTCHANGE_TP_1	Product change TP1	17		49014	Baseplate change TP 1	0		149939	13	2020-02-19 09:00:13	2020-02-19 09:00:13	2020-07-17 12:52:32	DE003	12	12	1	1	779174FA-48AE-4C61-85B8-DAB0B9386EF9.JPEG	2020-02-17 08:48:00	2020-02-17 08:48:00	2020-02-17 08:48:00	2020	2	17	1	1	3A5DAACD-A18B-4DAD-A22B-ABC673A4CD63.JPEG	2020-02-17 08:48:00	2020-02-17 08:48:00	2020-02-17 08:48:00	2020	2	17
16	CP288	86	Prod	1114	80	2072	24	Sanitätshaus Fürst GmbH	DE003	World	9764	Product change TP1	0	5849	APP_PRODUCTCHANGE_TP_1	Product change TP1	17		49014	Baseplate change TP 1	0		149942	14	2020-02-19 09:00:16	2020-02-19 09:00:16	2020-07-17 12:52:32	DE003	13	13	1	1	ACCE935C-20FF-4725-986F-27DC6C7E1042.JPEG	2020-02-18 07:45:00	2020-02-18 07:45:00	2020-02-18 07:45:00	2020	2	18	1	1	6BEC1278-05F0-461A-8207-3D81DEA2E7F8.JPEG	2020-02-18 07:45:00	2020-02-18 07:45:00	2020-02-18 07:45:00	2020	2	18
16	CP288	86	Prod	1114	80	2072	24	Sanitätshaus Fürst GmbH	DE003	World	9764	Product change TP1	0	5849	APP_PRODUCTCHANGE_TP_1	Product change TP1	17		49014	Baseplate change TP 1	0		149945	15	2020-02-19 09:00:32	2020-02-19 09:00:32	2020-07-17 12:52:32	DE003	14	14	1	1	7F34DCE8-4E65-4BF3-AEB3-EB20507A6FAE.JPEG	2020-02-19 09:09:00	2020-02-19 09:09:00	2020-02-19 09:09:00	2020	2	19	1	1	06172ABE-9217-45D9-9653-B94F7D4C7D22.JPEG	2020-02-19 09:09:00	2020-02-19 09:09:00	2020-02-19 09:09:00	2020	2	19
16	CP288	86	Prod	1114	80	2072	24	Sanitätshaus Fürst GmbH	DE003	World	9764	Product change TP1	0	5849	APP_PRODUCTCHANGE_TP_1	Product change TP1	17		49014	Baseplate change TP 1	0		152751	16	2020-02-22 07:00:11	2020-02-22 07:00:11	2020-07-17 12:52:32	DE003	16	16	1	1	2E8DD425-243C-42BA-8ABB-88F29A523B74.JPEG	2020-02-21 07:33:00	2020-02-21 07:33:00	2020-02-21 07:33:00	2020	2	21	1	1	9FB82CD7-25F8-4CEC-983F-59E2D0EB1176.JPEG	2020-02-21 07:33:00	2020-02-21 07:33:00	2020-02-21 07:33:00	2020	2	21
16	CP288	86	Prod	1114	80	2072	24	Sanitätshaus Fürst GmbH	DE003	World	9764	Product change TP1	0	5849	APP_PRODUCTCHANGE_TP_1	Product change TP1	17		49014	Baseplate change TP 1	0		153215	17	2020-02-25 07:00:07	2020-02-25 07:00:07	2020-07-17 12:52:32	DE003	17	17	1	1	0C5F6ACC-2D7D-4E16-A47D-07C5012CAAE2.JPEG	2020-02-22 07:01:00	2020-02-22 07:01:00	2020-02-22 07:01:00	2020	2	22	1	1	AFC1364F-B05D-457F-9DDD-80A6F801F2AC.JPEG	2020-02-22 07:01:00	2020-02-22 07:01:00	2020-02-22 07:01:00	2020	2	22
16	CP288	86	Prod	1114	80	2072	24	Sanitätshaus Fürst GmbH	DE003	World	9764	Product change TP1	0	5849	APP_PRODUCTCHANGE_TP_1	Product change TP1	17		49014	Baseplate change TP 1	0		153218	18	2020-02-25 07:00:10	2020-02-25 07:00:10	2020-07-17 12:52:32	DE003	18	18	1	1	F5D681E6-64B7-41F0-A142-CDA8E23E6EBC.JPEG	2020-02-23 08:10:00	2020-02-23 08:10:00	2020-02-23 08:10:00	2020	2	23	1	1	0DE408F3-9E83-4D2A-BBBF-22F1F0089504.JPEG	2020-02-23 08:10:00	2020-02-23 08:10:00	2020-02-23 08:10:00	2020	2	23
16	CP288	86	Prod	1114	80	2072	24	Sanitätshaus Fürst GmbH	DE003	World	9764	Product change TP1	0	5849	APP_PRODUCTCHANGE_TP_1	Product change TP1	17		49014	Baseplate change TP 1	0		153221	19	2020-02-25 07:00:13	2020-02-25 07:00:13	2020-07-17 12:52:32	DE003	19	19	1	1	4A86277E-7797-44F0-AC84-30D1CD137475.JPEG	2020-02-24 07:55:00	2020-02-24 07:55:00	2020-02-24 07:55:00	2020	2	24	1	1	1013E056-307A-48DA-BC75-FF161321EFA8.JPEG	2020-02-24 07:55:00	2020-02-24 07:55:00	2020-02-24 07:55:00	2020	2	24
16	CP288	86	Prod	1114	80	2072	24	Sanitätshaus Fürst GmbH	DE003	World	9764	Product change TP1	0	5849	APP_PRODUCTCHANGE_TP_1	Product change TP1	17		49014	Baseplate change TP 1	0		154308	20	2020-02-26 07:00:07	2020-02-26 07:00:07	2020-07-17 12:52:32	DE003	20	20	1	1	1A2897DB-6D35-4E07-8688-E8539B428697.JPEG	2020-02-25 07:36:00	2020-02-25 07:36:00	2020-02-25 07:36:00	2020	2	25	1	1	7A4239A8-8BCE-4AF6-9402-E66713014098.JPEG	2020-02-25 07:36:00	2020-02-25 07:36:00	2020-02-25 07:36:00	2020	2	25
16	CP288	86	Prod	1114	80	2072	24	Sanitätshaus Fürst GmbH	DE003	World	9764	Product change TP1	0	5849	APP_PRODUCTCHANGE_TP_1	Product change TP1	17		49014	Baseplate change TP 1	0		154553	21	2020-02-27 07:00:07	2020-02-27 07:00:07	2020-07-17 12:52:32	DE003	21	21	1	1	91D46CBA-FCC5-4A90-993E-620B09B7145F.JPEG	2020-02-26 07:19:00	2020-02-26 07:19:00	2020-02-26 07:19:00	2020	2	26	1	1	E092D64D-EEF7-4BDF-84F5-8CA08EBCDF48.JPEG	2020-02-26 07:19:00	2020-02-26 07:19:00	2020-02-26 07:19:00	2020	2	26
16	CP288	86	Prod	1114	80	2072	24	Sanitätshaus Fürst GmbH	DE003	World	9764	Product change TP1	0	5849	APP_PRODUCTCHANGE_TP_1	Product change TP1	17		49014	Baseplate change TP 1	0		154615	22	2020-02-27 08:00:04	2020-02-27 08:00:04	2020-07-17 12:52:32	DE003	22	22	1	1	3180C096-F0CE-409A-BBD8-330F18E3A587.JPEG	2020-02-27 07:25:00	2020-02-27 07:25:00	2020-02-27 07:25:00	2020	2	27	1	1	294ADDB8-7F6B-478D-927F-82BB7F434AC0.JPEG	2020-02-27 07:25:00	2020-02-27 07:25:00	2020-02-27 07:25:00	2020	2	27
16	CP288	86	Prod	1115	80	2073	24	Sanitätshaus Fürst GmbH	DE003	World	9795	Product change TP1	0	5849	APP_PRODUCTCHANGE_TP_1	Product change TP1	17		49074	Baseplate change TP 1	0		132788	1	2020-02-04 11:00:13	2020-02-04 11:00:13	2020-07-17 12:52:32	DE003	0	0	1	1	5F6F2B9D-E4F1-40A2-AD1D-EC541E07CBAA.JPEG	2020-02-04 10:48:00	2020-02-04 10:48:00	2020-02-04 10:48:00	2020	2	4	1	1	BA1586EE-7D2B-43C4-8ABA-1F7025A9B950.JPEG	2020-02-04 10:50:00	2020-02-04 10:50:00	2020-02-04 10:50:00	2020	2	4
16	CP288	86	Prod	1115	80	2073	24	Sanitätshaus Fürst GmbH	DE003	World	9795	Product change TP1	0	5849	APP_PRODUCTCHANGE_TP_1	Product change TP1	17		49074	Baseplate change TP 1	0		145835	2	2020-02-06 10:00:18	2020-02-06 10:00:18	2020-07-17 12:52:32	DE003	1	1	1	1	6503E500-FFD2-42DA-80CE-C7B035229CCD.JPEG	2020-02-06 10:29:00	2020-02-06 10:29:00	2020-02-06 10:29:00	2020	2	6	1	1	B665F846-62F1-4CFB-806E-B8E408A019EA.JPEG	2020-02-06 10:30:00	2020-02-06 10:30:00	2020-02-06 10:30:00	2020	2	6
16	CP288	86	Prod	1115	80	2073	24	Sanitätshaus Fürst GmbH	DE003	World	9795	Product change TP1	0	5849	APP_PRODUCTCHANGE_TP_1	Product change TP1	17		49074	Baseplate change TP 1	0		146021	3	2020-02-08 19:00:07	2020-02-08 19:00:07	2020-07-17 12:52:32	DE003	2	2	1	1	8B485881-D70A-45DA-8005-38106059A2C5.JPEG	2020-02-08 19:11:00	2020-02-08 19:11:00	2020-02-08 19:11:00	2020	2	8	1	1	517FE0A8-CEBE-4BB8-B6EB-E17C2E6BBEE5.JPEG	2020-02-08 19:12:00	2020-02-08 19:12:00	2020-02-08 19:12:00	2020	2	8
16	CP288	86	Prod	1115	80	2073	24	Sanitätshaus Fürst GmbH	DE003	World	9795	Product change TP1	0	5849	APP_PRODUCTCHANGE_TP_1	Product change TP1	17		49074	Baseplate change TP 1	0		146079	4	2020-02-10 15:00:07	2020-02-10 15:00:07	2020-07-17 12:52:32	DE003	3	3	1	1	8E18BEF6-8641-4320-BA6E-2E481C56FE2A.JPEG	2020-02-10 15:36:00	2020-02-10 15:36:00	2020-02-10 15:36:00	2020	2	10	1	1	318175AE-82EE-4584-BB4D-E8A562BE6931.JPEG	2020-02-10 15:37:00	2020-02-10 15:37:00	2020-02-10 15:37:00	2020	2	10
16	CP288	86	Prod	1115	80	2073	24	Sanitätshaus Fürst GmbH	DE003	World	9795	Product change TP1	0	5849	APP_PRODUCTCHANGE_TP_1	Product change TP1	17		49074	Baseplate change TP 1	0		146155	5	2020-02-11 16:00:07	2020-02-11 16:00:07	2020-07-17 12:52:32	DE003	4	4	1	1	DEC252BF-A040-42FB-B137-E0E072DFE87E.JPEG	2020-02-11 16:49:00	2020-02-11 16:49:00	2020-02-11 16:49:00	2020	2	11	1	1	1A0DB602-0C5C-4F22-BD34-9103F793ADE9.JPEG	2020-02-11 16:50:00	2020-02-11 16:50:00	2020-02-11 16:50:00	2020	2	11
16	CP288	86	Prod	1115	80	2073	24	Sanitätshaus Fürst GmbH	DE003	World	9795	Product change TP1	0	5849	APP_PRODUCTCHANGE_TP_1	Product change TP1	17		49074	Baseplate change TP 1	0		146452	6	2020-02-13 10:00:06	2020-02-13 10:00:06	2020-07-17 12:52:32	DE003	5	5	1	1	E23B8A96-9B17-4423-8581-F0DC38F31A0C.JPEG	2020-02-13 10:36:00	2020-02-13 10:36:00	2020-02-13 10:36:00	2020	2	13	1	1	884C6D0E-2497-45AF-A4F8-FBDED21390AF.JPEG	2020-02-13 10:36:00	2020-02-13 10:36:00	2020-02-13 10:36:00	2020	2	13
16	CP288	86	Prod	1115	80	2073	24	Sanitätshaus Fürst GmbH	DE003	World	9795	Product change TP1	0	5849	APP_PRODUCTCHANGE_TP_1	Product change TP1	17		49074	Baseplate change TP 1	0		146506	7	2020-02-15 06:00:11	2020-02-15 06:00:11	2020-07-17 12:52:32	DE003	6	6	1	1	F7BF9790-39F9-4304-A83F-9C2ACC5C4B24.JPEG	2020-02-15 06:22:00	2020-02-15 06:22:00	2020-02-15 06:22:00	2020	2	15	1	1	08C83D38-262E-46AF-92A2-4AED132F7957.JPEG	2020-02-15 06:27:00	2020-02-15 06:27:00	2020-02-15 06:27:00	2020	2	15
16	CP288	86	Prod	1115	80	2073	24	Sanitätshaus Fürst GmbH	DE003	World	9795	Product change TP1	0	5849	APP_PRODUCTCHANGE_TP_1	Product change TP1	17		49074	Baseplate change TP 1	0		146556	8	2020-02-16 17:00:07	2020-02-16 17:00:07	2020-07-17 12:52:32	DE003	7	7	1	1	5C8987C3-64C3-4810-B05F-EA816377FDA6.JPEG	2020-02-16 16:55:00	2020-02-16 16:55:00	2020-02-16 16:55:00	2020	2	16	1	1	4CC7DDF0-82AF-48D0-BED4-5A3A8BAC430A.JPEG	2020-02-16 16:56:00	2020-02-16 16:56:00	2020-02-16 16:56:00	2020	2	16
16	CP288	86	Prod	1115	80	2073	24	Sanitätshaus Fürst GmbH	DE003	World	9795	Product change TP1	0	5849	APP_PRODUCTCHANGE_TP_1	Product change TP1	17		49074	Baseplate change TP 1	0		146741	9	2020-02-17 20:00:04	2020-02-17 20:00:04	2020-07-17 12:52:32	DE003	8	8	1	1	53B3531F-24D0-4962-95BB-44B105F93310.JPEG	2020-02-17 20:47:00	2020-02-17 20:47:00	2020-02-17 20:47:00	2020	2	17	1	1	EB0B7C8F-2293-4688-9750-7AE78048469E.JPEG	2020-02-17 20:47:00	2020-02-17 20:47:00	2020-02-17 20:47:00	2020	2	17
16	CP288	86	Prod	1115	80	2073	24	Sanitätshaus Fürst GmbH	DE003	World	9795	Product change TP1	0	5849	APP_PRODUCTCHANGE_TP_1	Product change TP1	17		49074	Baseplate change TP 1	0		152789	10	2020-02-22 19:00:13	2020-02-22 19:00:13	2020-07-17 12:52:32	DE003	10	10	1	1	8FF5FD1B-766D-4404-98DA-0B7827FF5255.JPEG	2020-02-21 06:36:00	2020-02-21 06:36:00	2020-02-21 06:36:00	2020	2	21	1	1	03A00A79-1824-4847-94CC-34891E9CA4BF.JPEG	2020-02-21 06:36:00	2020-02-21 06:36:00	2020-02-21 06:36:00	2020	2	21
16	CP288	86	Prod	1115	80	2073	24	Sanitätshaus Fürst GmbH	DE003	World	9795	Product change TP1	0	5849	APP_PRODUCTCHANGE_TP_1	Product change TP1	17		49074	Baseplate change TP 1	0		152792	11	2020-02-23 09:00:12	2020-02-23 09:00:12	2020-07-17 12:52:32	DE003	9	9	1	1	26ED589F-D1A5-48C5-AD89-E0D52819C576.JPEG	2020-02-19 15:31:00	2020-02-19 15:31:00	2020-02-19 15:31:00	2020	2	19	1	1	5314A68D-C9B7-44A4-BF8B-7108D9E7EE32.JPEG	2020-02-19 15:32:00	2020-02-19 15:32:00	2020-02-19 15:32:00	2020	2	19
16	CP288	86	Prod	1115	80	2073	24	Sanitätshaus Fürst GmbH	DE003	World	9795	Product change TP1	0	5849	APP_PRODUCTCHANGE_TP_1	Product change TP1	17		49074	Baseplate change TP 1	0		153188	12	2020-02-24 21:00:14	2020-02-24 21:00:14	2020-07-17 12:52:32	DE003	11	11	1	1	53AAE295-3BE6-4D92-9794-B788EBC005C1.JPEG	2020-02-22 19:00:00	2020-02-22 19:00:00	2020-02-22 19:00:00	2020	2	22	1	1	FC79BEFA-7C8C-4795-9B50-7ECEF6BD7B3A.JPEG	2020-02-22 19:01:00	2020-02-22 19:01:00	2020-02-22 19:01:00	2020	2	22
16	CP288	86	Prod	1115	80	2073	24	Sanitätshaus Fürst GmbH	DE003	World	9795	Product change TP1	0	5849	APP_PRODUCTCHANGE_TP_1	Product change TP1	17		49074	Baseplate change TP 1	0		153206	13	2020-02-25 02:00:51	2020-02-25 02:00:51	2020-07-17 12:52:32	DE003	12	12	1	1	72FDD9E4-8824-4AB1-B845-27DD8E724DEB.JPEG	2020-02-23 22:18:00	2020-02-23 22:18:00	2020-02-23 22:18:00	2020	2	23	1	1	A8218CEC-4A11-40C9-ABE1-45F6C538EE7F.JPEG	2020-02-23 22:18:00	2020-02-23 22:18:00	2020-02-23 22:18:00	2020	2	23
16	CP288	86	Prod	1115	80	2073	24	Sanitätshaus Fürst GmbH	DE003	World	9795	Product change TP1	0	5849	APP_PRODUCTCHANGE_TP_1	Product change TP1	17		49074	Baseplate change TP 1	0		153233	14	2020-02-25 08:00:08	2020-02-25 08:00:08	2020-07-17 12:52:32	DE003	13	13	1	1	1F93333D-284E-41E2-BD22-DFE98E917B1B.JPEG	2020-02-24 21:58:00	2020-02-24 21:58:00	2020-02-24 21:58:00	2020	2	24	1	1	4DCD16B7-B002-4256-9B8B-21BEC0B9D74A.JPEG	2020-02-24 21:58:00	2020-02-24 21:58:00	2020-02-24 21:58:00	2020	2	24
16	CP288	86	Prod	1115	80	2073	24	Sanitätshaus Fürst GmbH	DE003	World	9795	Product change TP1	0	5849	APP_PRODUCTCHANGE_TP_1	Product change TP1	17		49074	Baseplate change TP 1	0		154653	15	2020-02-27 19:00:51	2020-02-27 19:00:51	2020-07-17 12:52:32	DE003	14	14	1	1	9F641D5B-49AD-4F29-9898-F4821313E78A.JPEG	2020-02-25 08:38:00	2020-02-25 08:38:00	2020-02-25 08:38:00	2020	2	25	1	1	2B0231E6-25B5-4A60-A2A0-B9F870A02E66.JPEG	2020-02-25 08:38:00	2020-02-25 08:38:00	2020-02-25 08:38:00	2020	2	25
16	CP288	86	Prod	1115	80	2073	24	Sanitätshaus Fürst GmbH	DE003	World	9795	Product change TP1	0	5849	APP_PRODUCTCHANGE_TP_1	Product change TP1	17		49074	Baseplate change TP 1	0		154656	16	2020-02-27 19:01:02	2020-02-27 19:01:02	2020-07-17 12:52:32	DE003	15	15	1	1	E1B1CE96-350D-460A-A90C-33904B875792.JPEG	2020-02-26 12:49:00	2020-02-26 12:49:00	2020-02-26 12:49:00	2020	2	26	1	1	93CF291C-4F92-4357-AA90-AC7968BAB0C6.JPEG	2020-02-26 12:49:00	2020-02-26 12:49:00	2020-02-26 12:49:00	2020	2	26
16	CP288	86	Prod	1115	80	2073	24	Sanitätshaus Fürst GmbH	DE003	World	9795	Product change TP1	0	5849	APP_PRODUCTCHANGE_TP_1	Product change TP1	17		49074	Baseplate change TP 1	0		154769	17	2020-02-28 19:00:10	2020-02-28 19:00:10	2020-07-17 12:52:32	DE003	16	16	1	1	03B20F22-B20B-4B01-80C2-E9EFA03B6B76.JPEG	2020-02-27 19:32:00	2020-02-27 19:32:00	2020-02-27 19:32:00	2020	2	27	1	1	06D939E9-6228-4BFB-A70A-B410CE151FA0.JPEG	2020-02-27 19:32:00	2020-02-27 19:32:00	2020-02-27 19:32:00	2020	2	27
16	CP288	86	Prod	1115	80	2073	24	Sanitätshaus Fürst GmbH	DE003	World	9795	Product change TP1	0	5849	APP_PRODUCTCHANGE_TP_1	Product change TP1	17		49074	Baseplate change TP 1	0		154775	18	2020-02-28 20:00:06	2020-02-28 20:00:06	2020-07-17 12:52:32	DE003	17	17	1	1	54652BB5-CE39-4337-85CB-D03E5F69FF81.JPEG	2020-02-28 19:49:00	2020-02-28 19:49:00	2020-02-28 19:49:00	2020	2	28	1	1	70F4E21E-DCDE-4A69-98CA-07DF27DCE104.JPEG	2020-02-28 19:50:00	2020-02-28 19:50:00	2020-02-28 19:50:00	2020	2	28
16	CP288	86	Prod	1115	80	2073	24	Sanitätshaus Fürst GmbH	DE003	World	9795	Product change TP1	0	5849	APP_PRODUCTCHANGE_TP_1	Product change TP1	17		49074	Baseplate change TP 1	0		154828	19	2020-02-29 15:00:11	2020-02-29 15:00:11	2020-07-17 12:52:32	DE003	18	18	1	1	7502D9B8-8E6C-41C6-8D2B-5C178037FAB0.JPEG	2020-02-29 15:02:00	2020-02-29 15:02:00	2020-02-29 15:02:00	2020	2	29	1	1	2126BA07-5DBA-4C25-9A1D-AB4031633C9D.JPEG	2020-02-29 15:02:00	2020-02-29 15:02:00	2020-02-29 15:02:00	2020	2	29
16	CP288	86	Prod	1115	80	2073	24	Sanitätshaus Fürst GmbH	DE003	World	9795	Product change TP1	0	5849	APP_PRODUCTCHANGE_TP_1	Product change TP1	17		49074	Baseplate change TP 1	0		157786	20	2020-03-04 17:00:08	2020-03-04 17:00:08	2020-07-17 12:52:32	DE003	19	19	1	1	937DED9F-8180-4AC3-871A-C7A08E949CF1.JPEG	2020-03-02 17:49:00	2020-03-02 17:49:00	2020-03-02 17:49:00	2020	3	2	1	1	E62E1A16-E9F7-4A27-81C4-75B73E3D24CC.JPEG	2020-03-02 17:49:00	2020-03-02 17:49:00	2020-03-02 17:49:00	2020	3	2
16	CP288	86	Prod	1115	80	2073	24	Sanitätshaus Fürst GmbH	DE003	World	9795	Product change TP1	0	5849	APP_PRODUCTCHANGE_TP_1	Product change TP1	17		49074	Baseplate change TP 1	0		157789	21	2020-03-04 17:00:11	2020-03-04 17:00:11	2020-07-17 12:52:32	DE003	20	20	1	1	B1995A46-7A32-43C4-8F11-A87B59728517.JPEG	2020-03-04 17:03:00	2020-03-04 17:03:00	2020-03-04 17:03:00	2020	3	4	1	1	FF90C3E6-4C5E-4754-887F-6EB7AF6887BA.JPEG	2020-03-04 17:04:00	2020-03-04 17:04:00	2020-03-04 17:04:00	2020	3	4
16	CP288	86	Prod	1115	80	2073	24	Sanitätshaus Fürst GmbH	DE003	World	9795	Product change TP1	0	5849	APP_PRODUCTCHANGE_TP_1	Product change TP1	17		49074	Baseplate change TP 1	0		157948	22	2020-03-06 16:00:08	2020-03-06 16:00:08	2020-07-17 12:52:32	DE003	21	21	1	1	506486CB-F50D-4762-BBC0-1C029840A876.JPEG	2020-03-06 16:50:00	2020-03-06 16:50:00	2020-03-06 16:50:00	2020	3	6	1	1	5C79AADB-98AE-4090-992F-E5D160FC0EE9.JPEG	2020-03-06 16:50:00	2020-03-06 16:50:00	2020-03-06 16:50:00	2020	3	6
16	CP288	86	Prod	1115	80	2073	24	Sanitätshaus Fürst GmbH	DE003	World	9795	Product change TP1	0	5849	APP_PRODUCTCHANGE_TP_1	Product change TP1	17		49074	Baseplate change TP 1	0		158342	23	2020-03-10 19:00:04	2020-03-10 19:00:04	2020-07-17 12:52:32	DE003	22	22	1	1	FEE5C5B6-CD7B-4CED-9033-ABF966B0B9D6.JPEG	2020-03-08 17:04:00	2020-03-08 17:04:00	2020-03-08 17:04:00	2020	3	8	1	1	374479D9-4AA1-4C51-9265-E9F2BBFDFB14.JPEG	2020-03-08 17:04:00	2020-03-08 17:04:00	2020-03-08 17:04:00	2020	3	8
16	CP288	86	Prod	1115	80	2073	24	Sanitätshaus Fürst GmbH	DE003	World	9795	Product change TP1	0	5849	APP_PRODUCTCHANGE_TP_1	Product change TP1	17		49074	Baseplate change TP 1	0		158345	24	2020-03-10 19:00:07	2020-03-10 19:00:07	2020-07-17 12:52:32	DE003	23	23	1	1	E898A1F8-F85E-4DB9-8CE2-475AD4DBF98F.JPEG	2020-03-10 19:27:00	2020-03-10 19:27:00	2020-03-10 19:27:00	2020	3	10	1	1	92714296-BEDA-4EF8-8FEB-67762016231F.JPEG	2020-03-10 19:27:00	2020-03-10 19:27:00	2020-03-10 19:27:00	2020	3	10
16	CP288	86	Prod	1115	80	2073	24	Sanitätshaus Fürst GmbH	DE003	World	9795	Product change TP1	0	5849	APP_PRODUCTCHANGE_TP_1	Product change TP1	17		49074	Baseplate change TP 1	0		158924	25	2020-03-14 17:00:06	2020-03-14 17:00:06	2020-07-17 12:52:32	DE003	24	24	1	1	08B8F0D6-E529-451B-930A-F24D33BC5F29.JPEG	2020-03-12 19:48:00	2020-03-12 19:48:00	2020-03-12 19:48:00	2020	3	12	1	1	A6F0F341-7750-44C0-A127-E547FB54371D.JPEG	2020-03-12 19:48:00	2020-03-12 19:48:00	2020-03-12 19:48:00	2020	3	12
16	CP288	86	Prod	1115	80	2073	24	Sanitätshaus Fürst GmbH	DE003	World	9795	Product change TP1	0	5849	APP_PRODUCTCHANGE_TP_1	Product change TP1	17		49074	Baseplate change TP 1	0		158927	26	2020-03-14 17:00:10	2020-03-14 17:00:10	2020-07-17 12:52:32	DE003	25	25	1	1	AB595113-F701-4691-B169-2E3A7631EE92.JPEG	2020-03-14 15:16:00	2020-03-14 15:16:00	2020-03-14 15:16:00	2020	3	14	1	1	61C02A55-9B51-4E1E-83E7-4CE5E4955B2F.JPEG	2020-03-14 15:16:00	2020-03-14 15:16:00	2020-03-14 15:16:00	2020	3	14
16	CP288	86	Prod	1115	80	2073	24	Sanitätshaus Fürst GmbH	DE003	World	9795	Product change TP1	0	5849	APP_PRODUCTCHANGE_TP_1	Product change TP1	17		49074	Baseplate change TP 1	0		161674	27	2020-03-18 10:00:09	2020-03-18 10:00:09	2020-07-17 12:52:32	DE003	26	26	1	1	BCEC1248-AE0B-4B99-A1A0-F6B012EE3828.JPEG	2020-03-16 16:50:00	2020-03-16 16:50:00	2020-03-16 16:50:00	2020	3	16	1	1	931F7EA5-30F0-43D8-A5CE-F82DBABC63C7.JPEG	2020-03-16 16:50:00	2020-03-16 16:50:00	2020-03-16 16:50:00	2020	3	16
16	CP288	86	Prod	1116	80	2074	24	Sanitätshaus Fürst GmbH	DE003	World	9826	Product change TP1	0	5849	APP_PRODUCTCHANGE_TP_1	Product change TP1	17		49134	Baseplate change TP 1	0		132868	1	2020-06-16 13:00:06	2020-06-16 13:00:06	2020-07-17 12:52:32	DE003	0	0	1	1	197F263D-351B-48C4-A29E-E965C8DC695F.JPEG	2020-01-20 02:08:00	2020-01-20 02:08:00	2020-01-20 02:08:00	2020	1	20	1	1	62BF691A-25B0-4F30-A0D5-A8B8DFEBE0DB.JPEG	2020-01-20 02:09:00	2020-01-20 02:09:00	2020-01-20 02:09:00	2020	1	20
16	CP288	86	Prod	1116	80	2074	24	Sanitätshaus Fürst GmbH	DE003	World	9829	Product change TP2	0	5852	APP_PRODUCTCHANGE_TP_2	Product change TP2	19		49135	Baseplate change TP 1	0		132870	1	2020-06-16 13:00:47	2020-06-16 13:00:47	2020-07-17 12:52:32	DE003	10	10	1	1	052C43C5-FAA7-4709-92E1-CDC81E6DA2F8.JPEG	2020-04-01 09:19:00	2020-04-01 09:19:00	2020-04-01 09:19:00	2020	4	1	1	1	36ACB6E5-2EF3-4BCF-BFB7-581AC66EE132.JPEG	2020-04-01 09:19:00	2020-04-01 09:19:00	2020-04-01 09:19:00	2020	4	1
16	CP288	86	Prod	1116	80	2074	24	Sanitätshaus Fürst GmbH	DE003	World	9826	Product change TP1	0	5849	APP_PRODUCTCHANGE_TP_1	Product change TP1	17		49134	Baseplate change TP 1	0		185920	2	2020-06-16 13:00:10	2020-06-16 13:00:10	2020-07-17 12:52:32	DE003	1	1	1	1	6E1542D8-6684-4448-B57F-8CAA6E28410F.JPEG	2020-01-22 01:33:00	2020-01-22 01:33:00	2020-01-22 01:33:00	2020	1	22	1	1	956E27F4-B0D6-42ED-9860-77302A300385.JPEG	2020-01-22 01:34:00	2020-01-22 01:34:00	2020-01-22 01:34:00	2020	1	22
16	CP288	86	Prod	1116	80	2074	24	Sanitätshaus Fürst GmbH	DE003	World	9826	Product change TP1	0	5849	APP_PRODUCTCHANGE_TP_1	Product change TP1	17		49134	Baseplate change TP 1	0		185923	3	2020-06-16 13:00:12	2020-06-16 13:00:12	2020-07-17 12:52:32	DE003	2	2	1	1	044D0F20-6075-44E7-8FAF-2DEA884AC89A.JPEG	2020-01-25 10:17:00	2020-01-25 10:17:00	2020-01-25 10:17:00	2020	1	25	1	1	AF1512DA-68BF-43B5-9DC5-C3125C39CFF9.JPEG	2020-01-25 10:18:00	2020-01-25 10:18:00	2020-01-25 10:18:00	2020	1	25
16	CP288	86	Prod	1116	80	2074	24	Sanitätshaus Fürst GmbH	DE003	World	9826	Product change TP1	0	5849	APP_PRODUCTCHANGE_TP_1	Product change TP1	17		49134	Baseplate change TP 1	0		185926	4	2020-06-16 13:00:14	2020-06-16 13:00:14	2020-07-17 12:52:32	DE003	3	3	1	1	ED46654D-7A0F-4437-89CF-BB6C4C201916.JPEG	2020-02-15 16:43:00	2020-02-15 16:43:00	2020-02-15 16:43:00	2020	2	15	1	1	9CA85F75-B40E-48CB-B5A0-7A0ECF27B38F.JPEG	2020-02-15 16:44:00	2020-02-15 16:44:00	2020-02-15 16:44:00	2020	2	15
16	CP288	86	Prod	1116	80	2074	24	Sanitätshaus Fürst GmbH	DE003	World	9826	Product change TP1	0	5849	APP_PRODUCTCHANGE_TP_1	Product change TP1	17		49134	Baseplate change TP 1	0		185929	5	2020-06-16 13:00:38	2020-06-16 13:00:38	2020-07-17 12:52:32	DE003	4	4	1	1	C73DDE92-08A7-4C9B-9389-5E7760EF9476.JPEG	2020-02-19 15:22:00	2020-02-19 15:22:00	2020-02-19 15:22:00	2020	2	19	1	1	26439181-EE7A-455D-9338-120E91ED6C16.JPEG	2020-02-19 15:23:00	2020-02-19 15:23:00	2020-02-19 15:23:00	2020	2	19
16	CP288	86	Prod	1116	80	2074	24	Sanitätshaus Fürst GmbH	DE003	World	9826	Product change TP1	0	5849	APP_PRODUCTCHANGE_TP_1	Product change TP1	17		49134	Baseplate change TP 1	0		185932	6	2020-06-16 13:00:41	2020-06-16 13:00:41	2020-07-17 12:52:32	DE003	5	5	1	1	DDB3F355-7982-4F34-B4B3-12E6DD61A5A0.JPEG	2020-02-23 17:47:00	2020-02-23 17:47:00	2020-02-23 17:47:00	2020	2	23	1	1	3ACF1D9E-D831-4332-A3B0-A877604C3073.JPEG	2020-02-23 17:48:00	2020-02-23 17:48:00	2020-02-23 17:48:00	2020	2	23
16	CP288	86	Prod	1116	80	2074	24	Sanitätshaus Fürst GmbH	DE003	World	9826	Product change TP1	0	5849	APP_PRODUCTCHANGE_TP_1	Product change TP1	17		49134	Baseplate change TP 1	0		185935	7	2020-06-16 13:00:44	2020-06-16 13:00:44	2020-07-17 12:52:32	DE003	6	6	1	1	45587797-949A-4F4D-8CEE-14C17D01B12B.JPEG	2020-02-27 18:57:00	2020-02-27 18:57:00	2020-02-27 18:57:00	2020	2	27	1	1	AFC8E889-00E3-450B-9CE1-4E8419A3AB21.JPEG	2020-02-27 18:58:00	2020-02-27 18:58:00	2020-02-27 18:58:00	2020	2	27
16	CP288	86	Prod	1116	80	2074	24	Sanitätshaus Fürst GmbH	DE003	World	9829	Product change TP2	0	5852	APP_PRODUCTCHANGE_TP_2	Product change TP2	19		49135	Baseplate change TP 1	0		185938	2	2020-06-16 13:01:06	2020-06-16 13:01:06	2020-07-17 12:52:32	DE003	8	8	1	1	49FB4217-F59E-44C0-826C-44F358CDD493.JPEG	2020-03-25 11:24:00	2020-03-25 11:24:00	2020-03-25 11:24:00	2020	3	25	1	1	42B0F3CF-3262-4199-8782-E92DCF3608C0.JPEG	2020-03-25 11:26:00	2020-03-25 11:26:00	2020-03-25 11:26:00	2020	3	25
16	CP288	86	Prod	1116	80	2074	24	Sanitätshaus Fürst GmbH	DE003	World	9829	Product change TP2	0	5852	APP_PRODUCTCHANGE_TP_2	Product change TP2	19		49135	Baseplate change TP 1	0		186032	3	2020-06-16 15:00:11	2020-06-16 15:00:11	2020-07-17 12:52:32	DE003	9	9	1	1	9F57AC85-2459-423C-B61E-BEDA38D2F250.JPEG	2020-03-28 14:17:00	2020-03-28 14:17:00	2020-03-28 14:17:00	2020	3	28	1	1	6C64382C-7B75-45B8-A41A-8481D5A8D6D8.JPEG	2020-03-28 14:18:00	2020-03-28 14:18:00	2020-03-28 14:18:00	2020	3	28
16	CP288	86	Prod	1117	80	2075	24	Sanitätshaus Fürst GmbH	DE003	World	9857	Product change TP1	0	5849	APP_PRODUCTCHANGE_TP_1	Product change TP1	17		49194	Baseplate change TP 1	0		132948	1	2020-02-05 14:00:07	2020-02-05 14:00:07	2020-07-17 12:52:32	DE003	0	0	1	1	8A4EA98C-55F6-47A0-B7AF-9DB0D8E3239A.JPEG	2020-02-05 14:41:00	2020-02-05 14:41:00	2020-02-05 14:41:00	2020	2	5	1	1	9322E422-7895-4D9C-893C-26BD3545ED80.JPEG	2020-02-05 14:43:00	2020-02-05 14:43:00	2020-02-05 14:43:00	2020	2	5
16	CP288	86	Prod	1171	82	1001	25	NO001	NO001	World	11386	Product change TP1	0	6993	APP_PRODUCTCHANGE_TP_1	Product change TP1	17		52535	Baseplate change TP 1	0		137631	1	2020-01-22 14:00:13	2020-01-22 14:00:13	2020-07-17 12:52:32	NO001	0	0	1	1	6DCC34D3-0B4F-4280-B3CD-D32F53D0E431.JPEG	2020-01-22 14:08:00	2020-01-22 14:08:00	2020-01-22 14:08:00	2020	1	22	1	1	0D752837-8C6B-4F2B-8AC1-DAF0C9FBCD8B.JPEG	2020-01-22 14:09:00	2020-01-22 14:09:00	2020-01-22 14:09:00	2020	1	22
16	CP288	86	Prod	1171	82	1001	25	NO001	NO001	World	11386	Product change TP1	0	6993	APP_PRODUCTCHANGE_TP_1	Product change TP1	17		52535	Baseplate change TP 1	0		143235	2	2020-01-25 09:00:08	2020-01-25 09:00:08	2020-07-17 12:52:32	NO001	1	1	1	1	8A896D01-0D90-4CC2-8B3C-51CF15F70827.JPEG	2020-01-25 09:15:00	2020-01-25 09:15:00	2020-01-25 09:15:00	2020	1	25	1	1	13DC4C62-D593-43C8-B16F-FCF43F15B805.JPEG	2020-01-25 09:16:00	2020-01-25 09:16:00	2020-01-25 09:16:00	2020	1	25
16	CP288	86	Prod	1171	82	1001	25	NO001	NO001	World	11386	Product change TP1	0	6993	APP_PRODUCTCHANGE_TP_1	Product change TP1	17		52535	Baseplate change TP 1	0		144378	3	2020-01-30 19:00:08	2020-01-30 19:00:08	2020-07-17 12:52:32	NO001	2	2	1	1	EB7FAB83-2746-4AB8-9580-345752E080FA.JPEG	2020-01-28 19:13:00	2020-01-28 19:13:00	2020-01-28 19:13:00	2020	1	28	1	1	2AEBA6BE-081B-4970-AC65-082AE756D7A5.JPEG	2020-01-28 19:13:00	2020-01-28 19:13:00	2020-01-28 19:13:00	2020	1	28
16	CP288	86	Prod	1171	82	1001	25	NO001	NO001	World	11386	Product change TP1	0	6993	APP_PRODUCTCHANGE_TP_1	Product change TP1	17		52535	Baseplate change TP 1	0		144381	4	2020-01-30 19:00:13	2020-01-30 19:00:13	2020-07-17 12:52:32	NO001	3	3	1	1	F8A71E63-BAD5-44FC-989D-5141749CF9B6.JPEG	2020-01-30 19:27:00	2020-01-30 19:27:00	2020-01-30 19:27:00	2020	1	30	1	1	2613A6EB-2877-42EC-B019-D42346F2235A.JPEG	2020-01-30 19:29:00	2020-01-30 19:29:00	2020-01-30 19:29:00	2020	1	30
16	CP288	86	Prod	1171	82	1001	25	NO001	NO001	World	11386	Product change TP1	0	6993	APP_PRODUCTCHANGE_TP_1	Product change TP1	17		52535	Baseplate change TP 1	0		146047	5	2020-02-09 22:00:09	2020-02-09 22:00:09	2020-07-17 12:52:32	NO001	4	4	1	1	AE8EEA36-42E6-4C88-90B8-2FADCD348993.JPEG	2020-02-03 19:55:00	2020-02-03 19:55:00	2020-02-03 19:55:00	2020	2	3	1	1	8559D66E-5D48-49FF-AFC2-3EE1F176F92D.JPEG	2020-02-03 19:56:00	2020-02-03 19:56:00	2020-02-03 19:56:00	2020	2	3
16	CP288	86	Prod	1171	82	1001	25	NO001	NO001	World	11386	Product change TP1	0	6993	APP_PRODUCTCHANGE_TP_1	Product change TP1	17		52535	Baseplate change TP 1	0		146050	6	2020-02-09 22:00:16	2020-02-09 22:00:16	2020-07-17 12:52:32	NO001	5	5	1	1	8329301A-BED7-4201-AD92-EB2C5B00EC9D.JPEG	2020-02-06 22:23:00	2020-02-06 22:23:00	2020-02-06 22:23:00	2020	2	6	1	1	C58AF26F-AFE0-48FB-A5A6-8721FCE4A3BE.JPEG	2020-02-06 22:24:00	2020-02-06 22:24:00	2020-02-06 22:24:00	2020	2	6
16	CP288	86	Prod	1171	82	1001	25	NO001	NO001	World	11386	Product change TP1	0	6993	APP_PRODUCTCHANGE_TP_1	Product change TP1	17		52535	Baseplate change TP 1	0		146053	7	2020-02-09 22:00:21	2020-02-09 22:00:21	2020-07-17 12:52:32	NO001	6	6	1	1	C2A20A6D-26BA-44BC-B301-E47AFFAD9EB2.JPEG	2020-02-09 22:37:00	2020-02-09 22:37:00	2020-02-09 22:37:00	2020	2	9	1	1	E335FFCA-092F-49EE-A8D0-090832923F61.JPEG	2020-02-09 22:37:00	2020-02-09 22:37:00	2020-02-09 22:37:00	2020	2	9
16	CP288	86	Prod	1171	82	1001	25	NO001	NO001	World	11386	Product change TP1	0	6993	APP_PRODUCTCHANGE_TP_1	Product change TP1	17		52535	Baseplate change TP 1	0		146577	8	2020-02-16 22:00:05	2020-02-16 22:00:05	2020-07-17 12:52:32	NO001	7	7	1	1	B7D773C7-2A66-42C0-B8BE-F299A4B7A307.JPEG	2020-02-13 20:29:00	2020-02-13 20:29:00	2020-02-13 20:29:00	2020	2	13	1	1	7DCE9FF5-C0D5-45EA-A196-0718F2274EFD.JPEG	2020-02-13 20:29:00	2020-02-13 20:29:00	2020-02-13 20:29:00	2020	2	13
16	CP288	86	Prod	1171	82	1001	25	NO001	NO001	World	11386	Product change TP1	0	6993	APP_PRODUCTCHANGE_TP_1	Product change TP1	17		52535	Baseplate change TP 1	0		150475	9	2020-02-19 22:00:16	2020-02-19 22:00:16	2020-07-17 12:52:32	NO001	8	8	1	1	D627D06C-E912-4015-B55F-AD5019368263.JPEG	2020-02-16 22:14:00	2020-02-16 22:14:00	2020-02-16 22:14:00	2020	2	16	1	1	639B0D55-3A58-4ECE-9D11-FFADB815BE1A.JPEG	2020-02-16 22:15:00	2020-02-16 22:15:00	2020-02-16 22:15:00	2020	2	16
16	CP288	86	Prod	1171	82	1001	25	NO001	NO001	World	11386	Product change TP1	0	6993	APP_PRODUCTCHANGE_TP_1	Product change TP1	17		52535	Baseplate change TP 1	0		150478	10	2020-02-19 22:00:32	2020-02-19 22:00:32	2020-07-17 12:52:32	NO001	9	9	1	1	7995B12D-BE7D-4F77-A148-6502DB0A4239.JPEG	2020-02-19 22:19:00	2020-02-19 22:19:00	2020-02-19 22:19:00	2020	2	19	1	1	BFA280DE-E7BC-4C1B-8B20-0389D9533A52.JPEG	2020-02-19 22:20:00	2020-02-19 22:20:00	2020-02-19 22:20:00	2020	2	19
16	CP288	86	Prod	1171	82	1001	25	NO001	NO001	World	11386	Product change TP1	0	6993	APP_PRODUCTCHANGE_TP_1	Product change TP1	17		52535	Baseplate change TP 1	0		154305	11	2020-02-26 06:00:13	2020-02-26 06:00:13	2020-07-17 12:52:32	NO001	11	11	1	1	F91767A5-72ED-456B-B7BD-D09C7AF8F8A8.JPEG	2020-02-26 06:03:00	2020-02-26 06:03:00	2020-02-26 06:03:00	2020	2	26	1	1	C80D815A-FFCF-47FF-8868-88F7E2832791.JPEG	2020-02-26 06:05:00	2020-02-26 06:05:00	2020-02-26 06:05:00	2020	2	26
16	CP288	86	Prod	1171	82	1001	25	NO001	NO001	World	11386	Product change TP1	0	6993	APP_PRODUCTCHANGE_TP_1	Product change TP1	17		52535	Baseplate change TP 1	0		154846	12	2020-02-29 21:00:11	2020-02-29 21:00:11	2020-07-17 12:52:32	NO001	12	12	1	1	B2DB0380-38E4-4929-B118-8E1996FB4621.JPEG	2020-02-29 20:18:00	2020-02-29 20:18:00	2020-02-29 20:18:00	2020	2	29	1	1	60C54F68-D7AA-43E2-9D1B-0EB77563D8DF.JPEG	2020-02-29 20:19:00	2020-02-29 20:19:00	2020-02-29 20:19:00	2020	2	29
16	CP288	86	Prod	1171	82	1001	25	NO001	NO001	World	11386	Product change TP1	0	6993	APP_PRODUCTCHANGE_TP_1	Product change TP1	17		52535	Baseplate change TP 1	0		154993	13	2020-03-02 16:00:34	2020-03-02 16:00:34	2020-07-17 12:52:32	NO001	13	13	1	1	2522D458-7367-430D-8AD2-D286AE69E381.JPEG	2020-03-01 21:30:00	2020-03-01 21:30:00	2020-03-01 21:30:00	2020	3	1	1	1	93C4FBF8-6D44-49B3-ADA3-C85724E84BD3.JPEG	2020-03-01 21:31:00	2020-03-01 21:31:00	2020-03-01 21:31:00	2020	3	1
16	CP288	86	Prod	1171	82	1001	25	NO001	NO001	World	11386	Product change TP1	0	6993	APP_PRODUCTCHANGE_TP_1	Product change TP1	17		52535	Baseplate change TP 1	0		154996	14	2020-03-02 16:00:43	2020-03-02 16:00:43	2020-07-17 12:52:32	NO001	14	14	1	1	2D2C4A8A-7B7B-4B47-9783-DF48F3D833C8.JPEG	2020-03-02 16:17:00	2020-03-02 16:17:00	2020-03-02 16:17:00	2020	3	2	1	1	D6671905-6F3F-44AC-945E-383B5B99DCE5.JPEG	2020-03-02 16:17:00	2020-03-02 16:17:00	2020-03-02 16:17:00	2020	3	2
16	CP288	86	Prod	1171	82	1001	25	NO001	NO001	World	11386	Product change TP1	0	6993	APP_PRODUCTCHANGE_TP_1	Product change TP1	17		52535	Baseplate change TP 1	0		157804	15	2020-03-04 23:00:09	2020-03-04 23:00:09	2020-07-17 12:52:32	NO001	15	15	1	1	2F7D605A-BD85-48C8-BB21-A69F3DD40211.JPEG	2020-03-04 23:09:00	2020-03-04 23:09:00	2020-03-04 23:09:00	2020	3	4	1	1	8ECB7F5E-3831-4467-A1DD-320E475D6A75.JPEG	2020-03-04 23:09:00	2020-03-04 23:09:00	2020-03-04 23:09:00	2020	3	4
16	CP288	86	Prod	1171	82	1001	25	NO001	NO001	World	11386	Product change TP1	0	6993	APP_PRODUCTCHANGE_TP_1	Product change TP1	17		52535	Baseplate change TP 1	0		157996	16	2020-03-07 11:00:21	2020-03-07 11:00:21	2020-07-17 12:52:32	NO001	16	16	1	1	F9F41048-4A4D-41F4-ADF7-4F5A324BB03C.JPEG	2020-03-07 11:06:00	2020-03-07 11:06:00	2020-03-07 11:06:00	2020	3	7	1	1	4D514566-FEF9-4BCD-AE53-CED49D8382C1.JPEG	2020-03-07 11:07:00	2020-03-07 11:07:00	2020-03-07 11:07:00	2020	3	7
16	CP288	86	Prod	1171	82	1001	25	NO001	NO001	World	11386	Product change TP1	0	6993	APP_PRODUCTCHANGE_TP_1	Product change TP1	17		52535	Baseplate change TP 1	0		158262	17	2020-03-09 16:00:07	2020-03-09 16:00:07	2020-07-17 12:52:32	NO001	17	17	1	1	BC0C346A-C31D-49E4-B799-AABD44B97A27.JPEG	2020-03-09 15:44:00	2020-03-09 15:44:00	2020-03-09 15:44:00	2020	3	9	1	1	23A5C2F6-6736-4F2E-937C-434E21F2BF2E.JPEG	2020-03-09 15:46:00	2020-03-09 15:46:00	2020-03-09 15:46:00	2020	3	9
16	CP288	86	Prod	1171	82	1001	25	NO001	NO001	World	11386	Product change TP1	0	6993	APP_PRODUCTCHANGE_TP_1	Product change TP1	17		52535	Baseplate change TP 1	0		158456	18	2020-03-11 20:00:17	2020-03-11 20:00:17	2020-07-17 12:52:32	NO001	18	18	1	1	E00618E7-2409-4BEB-9A8A-613BBACEDA8D.JPEG	2020-03-11 20:30:00	2020-03-11 20:30:00	2020-03-11 20:30:00	2020	3	11	1	1	7994160D-E747-4D1A-A3D1-055AAB3C729A.JPEG	2020-03-11 20:31:00	2020-03-11 20:31:00	2020-03-11 20:31:00	2020	3	11
16	CP288	86	Prod	1171	82	1001	25	NO001	NO001	World	11386	Product change TP1	0	6993	APP_PRODUCTCHANGE_TP_1	Product change TP1	17		52535	Baseplate change TP 1	0		158692	19	2020-03-13 13:00:06	2020-03-13 13:00:06	2020-07-17 12:52:32	NO001	19	19	1	1	34DC25D2-58A5-4D0B-85DA-E8FC23AD2912.JPEG	2020-03-13 13:54:00	2020-03-13 13:54:00	2020-03-13 13:54:00	2020	3	13	1	1	BF598967-A397-428C-AAF4-4DEA75A97198.JPEG	2020-03-13 13:54:00	2020-03-13 13:54:00	2020-03-13 13:54:00	2020	3	13
16	CP288	86	Prod	1171	82	1001	25	NO001	NO001	World	11386	Product change TP1	0	6993	APP_PRODUCTCHANGE_TP_1	Product change TP1	17		52535	Baseplate change TP 1	0		160011	20	2020-03-16 20:00:15	2020-03-16 20:00:15	2020-07-17 12:52:32	NO001	20	20	1	1	758D1EEC-C11B-4D2F-8A11-88DD7830F081.JPEG	2020-03-16 20:02:00	2020-03-16 20:02:00	2020-03-16 20:02:00	2020	3	16	1	1	D61B786A-C0BF-4F83-B84B-6876BC220ABC.JPEG	2020-03-16 20:02:00	2020-03-16 20:02:00	2020-03-16 20:02:00	2020	3	16
16	CP288	86	Prod	1171	82	1001	25	NO001	NO001	World	11386	Product change TP1	0	6993	APP_PRODUCTCHANGE_TP_1	Product change TP1	17		52535	Baseplate change TP 1	0		162243	21	2020-03-20 00:00:10	2020-03-20 00:00:10	2020-07-17 12:52:32	NO001	21	21	1	1	4599160A-44FE-4F94-AA2A-1C7F8FDEB51F.JPEG	2020-03-19 21:23:00	2020-03-19 21:23:00	2020-03-19 21:23:00	2020	3	19	1	1	BFB14C79-ABD1-4E3A-BBAF-499FAE355C6D.JPEG	2020-03-19 21:24:00	2020-03-19 21:24:00	2020-03-19 21:24:00	2020	3	19
16	CP288	86	Prod	1171	82	1001	25	NO001	NO001	World	11386	Product change TP1	0	6993	APP_PRODUCTCHANGE_TP_1	Product change TP1	17		52535	Baseplate change TP 1	0		162921	22	2020-03-22 22:00:10	2020-03-22 22:00:10	2020-07-17 12:52:32	NO001	22	22	1	1	7CF68044-E547-4C72-A301-FC2EE2971C73.JPEG	2020-03-22 22:30:00	2020-03-22 22:30:00	2020-03-22 22:30:00	2020	3	22	1	1	B973BC41-A349-444A-A2E4-D9241BB0EF52.JPEG	2020-03-22 22:32:00	2020-03-22 22:32:00	2020-03-22 22:32:00	2020	3	22
16	CP288	86	Prod	1171	82	1001	25	NO001	NO001	World	11386	Product change TP1	0	6993	APP_PRODUCTCHANGE_TP_1	Product change TP1	17		52535	Baseplate change TP 1	0		163906	23	2020-03-26 15:00:05	2020-03-26 15:00:05	2020-07-17 12:52:32	NO001	23	23	1	1	4210B85E-11CE-4166-9FDF-7B754D0CB87B.JPEG	2020-03-26 15:05:00	2020-03-26 15:05:00	2020-03-26 15:05:00	2020	3	26	1	1	54D7BB2F-82C4-4798-B39F-311F1072D492.JPEG	2020-03-26 15:07:00	2020-03-26 15:07:00	2020-03-26 15:07:00	2020	3	26
16	CP288	86	Prod	1171	82	1001	25	NO001	NO001	World	11386	Product change TP1	0	6993	APP_PRODUCTCHANGE_TP_1	Product change TP1	17		52535	Baseplate change TP 1	0		164674	24	2020-03-29 19:00:13	2020-03-29 19:00:13	2020-07-17 12:52:32	NO001	24	24	1	1	47C69369-35DB-4EF9-A562-D858A0175761.JPEG	2020-03-29 20:40:00	2020-03-29 20:40:00	2020-03-29 20:40:00	2020	3	29	1	1	20C381C9-059C-4817-AA4F-FB5AF9060174.JPEG	2020-03-29 20:41:00	2020-03-29 20:41:00	2020-03-29 20:41:00	2020	3	29
16	CP288	86	Prod	1171	82	1001	25	NO001	NO001	World	11386	Product change TP1	0	6993	APP_PRODUCTCHANGE_TP_1	Product change TP1	17		52535	Baseplate change TP 1	0		168687	25	2020-04-04 17:00:23	2020-04-04 17:00:23	2020-07-17 12:52:32	NO001	25	25	1	1	0F0FAD04-1233-49E6-9B80-64D16A4828FA.JPEG	2020-04-02 13:46:00	2020-04-02 13:46:00	2020-04-02 13:46:00	2020	4	2	1	1	60220630-30D5-4761-AEFC-031B33B673CE.JPEG	2020-04-02 13:47:00	2020-04-02 13:47:00	2020-04-02 13:47:00	2020	4	2
16	CP288	86	Prod	1171	82	1001	25	NO001	NO001	World	11386	Product change TP1	0	6993	APP_PRODUCTCHANGE_TP_1	Product change TP1	17		52535	Baseplate change TP 1	0		168693	26	2020-04-04 18:00:10	2020-04-04 18:00:10	2020-07-17 12:52:32	NO001	26	26	1	1	20C4440D-C69C-40B9-AB81-B8F0398BF196.JPEG	2020-04-04 18:14:00	2020-04-04 18:14:00	2020-04-04 18:14:00	2020	4	4	1	1	E886BC2A-7323-4962-9611-645984510B48.JPEG	2020-04-04 18:14:00	2020-04-04 18:14:00	2020-04-04 18:14:00	2020	4	4
16	CP288	86	Prod	1171	82	1001	25	NO001	NO001	World	11386	Product change TP1	0	6993	APP_PRODUCTCHANGE_TP_1	Product change TP1	17		52535	Baseplate change TP 1	0		169463	27	2020-04-11 11:00:07	2020-04-11 11:00:07	2020-07-17 12:52:32	NO001	27	27	1	1	C5BBDDC9-7FBC-4BC8-8D83-5897C5F679D2.JPEG	2020-04-08 08:40:00	2020-04-08 08:40:00	2020-04-08 08:40:00	2020	4	8	1	1	6634EE37-1EEC-4FA0-BD4D-C2E709A7F3CA.JPEG	2020-04-08 08:41:00	2020-04-08 08:41:00	2020-04-08 08:41:00	2020	4	8
16	CP288	86	Prod	1171	82	1001	25	NO001	NO001	World	11386	Product change TP1	0	6993	APP_PRODUCTCHANGE_TP_1	Product change TP1	17		52535	Baseplate change TP 1	0		169466	28	2020-04-11 11:00:11	2020-04-11 11:00:11	2020-07-17 12:52:32	NO001	28	28	1	1	6E56DFC6-E481-459C-A644-A0B37215379A.JPEG	2020-04-11 12:49:00	2020-04-11 12:49:00	2020-04-11 12:49:00	2020	4	11	1	1	5FBA806C-DB6C-4BA0-BDD1-627A316F14E4.JPEG	2020-04-11 12:49:00	2020-04-11 12:49:00	2020-04-11 12:49:00	2020	4	11
16	CP288	86	Prod	1171	82	1001	25	NO001	NO001	World	11386	Product change TP1	0	6993	APP_PRODUCTCHANGE_TP_1	Product change TP1	17		52535	Baseplate change TP 1	0		170053	29	2020-04-15 15:00:05	2020-04-15 15:00:05	2020-07-17 12:52:32	NO001	29	29	1	1	56A50EE8-0E21-4FA5-AAFF-D3469F88D9A6.JPEG	2020-04-15 16:48:00	2020-04-15 16:48:00	2020-04-15 16:48:00	2020	4	15	1	1	AD8891CF-DF50-4DB9-9AF9-533F17A5B07F.JPEG	2020-04-15 16:48:00	2020-04-15 16:48:00	2020-04-15 16:48:00	2020	4	15
16	CP288	86	Prod	1172	82	1002	25	NO001	NO001	World	11417	Product change TP1	0	6993	APP_PRODUCTCHANGE_TP_1	Product change TP1	17		52595	Baseplate change TP 1	0		137742	1	2020-01-23 13:00:15	2020-01-23 13:00:15	2020-07-17 12:52:32	NO001	0	0	1	1	45811E7A-0416-4DFB-9D10-61B29DC50540.JPEG	2020-01-23 13:31:00	2020-01-23 13:31:00	2020-01-23 13:31:00	2020	1	23	1	1	E4D4B316-555D-4680-ABD1-B0E12660EE9F.JPEG	2020-01-23 13:35:00	2020-01-23 13:35:00	2020-01-23 13:35:00	2020	1	23
16	CP288	86	Prod	1172	82	1002	25	NO001	NO001	World	11417	Product change TP1	0	6993	APP_PRODUCTCHANGE_TP_1	Product change TP1	17		52595	Baseplate change TP 1	0		177612	2	2020-05-20 10:00:21	2020-05-20 10:00:21	2020-07-17 12:52:32	NO001	1	1	1	1	92277D06-6495-4125-A1A5-A556755DA445.JPEG	2020-01-25 21:58:00	2020-01-25 21:58:00	2020-01-25 21:58:00	2020	1	25	1	1	5F5B2AF2-2BEF-436F-9807-CBADD1085025.JPEG	2020-01-25 21:59:00	2020-01-25 21:59:00	2020-01-25 21:59:00	2020	1	25
16	CP288	86	Prod	1173	82	1003	25	NO001	NO001	World	11448	Product change TP1	0	6993	APP_PRODUCTCHANGE_TP_1	Product change TP1	17		52655	Baseplate change TP 1	0		137791	1	2020-02-03 18:00:08	2020-02-03 18:00:08	2020-07-17 12:52:32	NO001	0	0	1	1	43D60426-B223-41A6-BCDC-9656E77B009B.JPEG	2020-02-03 18:50:00	2020-02-03 18:50:00	2020-02-03 18:50:00	2020	2	3	1	1	B08074AC-15D6-4F1A-9D84-882C97380BDC.JPEG	2020-02-03 18:52:00	2020-02-03 18:52:00	2020-02-03 18:52:00	2020	2	3
16	CP288	86	Prod	1173	82	1003	25	NO001	NO001	World	11449	Product change TP2	0	6994	APP_PRODUCTCHANGE_TP_2	Product change TP2	19		52656	Baseplate change TP 1	0		137793	1	2020-03-12 18:00:08	2020-03-12 18:00:08	2020-07-17 12:52:32	NO001	34	34	1	1	31EC52F4-CC4A-4754-B9E1-89D5463925E7.JPEG	2020-03-12 18:39:00	2020-03-12 18:39:00	2020-03-12 18:39:00	2020	3	12	1	1	3F7E6E8B-2609-40F5-B0A5-9B5AC4A9ACDF.JPEG	2020-03-12 18:39:00	2020-03-12 18:39:00	2020-03-12 18:39:00	2020	3	12
16	CP288	86	Prod	1173	82	1003	25	NO001	NO001	World	11448	Product change TP1	0	6993	APP_PRODUCTCHANGE_TP_1	Product change TP1	17		52655	Baseplate change TP 1	0		144673	2	2020-02-03 20:00:08	2020-02-03 20:00:08	2020-07-17 12:52:32	NO001	1	1	1	1	6CB63C50-1C01-4BA5-9B61-9E61412EDDB8.JPEG	2020-02-03 20:22:00	2020-02-03 20:22:00	2020-02-03 20:22:00	2020	2	3	1	1	8AC46390-B195-4290-A44C-688C0087AAEE.JPEG	2020-02-03 20:23:00	2020-02-03 20:23:00	2020-02-03 20:23:00	2020	2	3
16	CP288	86	Prod	1173	82	1003	25	NO001	NO001	World	11448	Product change TP1	0	6993	APP_PRODUCTCHANGE_TP_1	Product change TP1	17		52655	Baseplate change TP 1	0		144912	3	2020-02-05 18:00:07	2020-02-05 18:00:07	2020-07-17 12:52:32	NO001	2	2	1	1	0409F7ED-EDB2-4C47-880E-C5CD6F899D9A.JPEG	2020-02-05 18:48:00	2020-02-05 18:48:00	2020-02-05 18:48:00	2020	2	5	1	1	DDCE0E02-D6F9-4F5B-A07D-F76DFF74717A.JPEG	2020-02-05 18:48:00	2020-02-05 18:48:00	2020-02-05 18:48:00	2020	2	5
16	CP288	86	Prod	1173	82	1003	25	NO001	NO001	World	11448	Product change TP1	0	6993	APP_PRODUCTCHANGE_TP_1	Product change TP1	17		52655	Baseplate change TP 1	0		145957	4	2020-02-06 18:00:07	2020-02-06 18:00:07	2020-07-17 12:52:32	NO001	3	3	1	1	85D0440C-859F-4AF5-88E6-29AC653F9974.JPEG	2020-02-06 18:39:00	2020-02-06 18:39:00	2020-02-06 18:39:00	2020	2	6	1	1	1FE9ABC1-0F38-445F-A611-4FB8EEFC3BAE.JPEG	2020-02-06 18:40:00	2020-02-06 18:40:00	2020-02-06 18:40:00	2020	2	6
16	CP288	86	Prod	1173	82	1003	25	NO001	NO001	World	11448	Product change TP1	0	6993	APP_PRODUCTCHANGE_TP_1	Product change TP1	17		52655	Baseplate change TP 1	0		145992	5	2020-02-07 17:00:05	2020-02-07 17:00:05	2020-07-17 12:52:32	NO001	4	4	1	1	BE979566-B9C8-42E3-94BB-F09A55837C33.JPEG	2020-02-07 17:58:00	2020-02-07 17:58:00	2020-02-07 17:58:00	2020	2	7	1	1	745E8BB9-D2DE-4C9C-BC86-E447C2752D11.JPEG	2020-02-07 17:58:00	2020-02-07 17:58:00	2020-02-07 17:58:00	2020	2	7
16	CP288	86	Prod	1173	82	1003	25	NO001	NO001	World	11448	Product change TP1	0	6993	APP_PRODUCTCHANGE_TP_1	Product change TP1	17		52655	Baseplate change TP 1	0		146038	6	2020-02-09 16:00:08	2020-02-09 16:00:08	2020-07-17 12:52:32	NO001	5	5	1	1	FE41E3AE-4354-4E2D-8020-A3BACE23FBE2.JPEG	2020-02-09 16:49:00	2020-02-09 16:49:00	2020-02-09 16:49:00	2020	2	9	1	1	0D2CB459-54DF-4578-B9D6-04731B0B2C26.JPEG	2020-02-09 16:49:00	2020-02-09 16:49:00	2020-02-09 16:49:00	2020	2	9
16	CP288	86	Prod	1173	82	1003	25	NO001	NO001	World	11448	Product change TP1	0	6993	APP_PRODUCTCHANGE_TP_1	Product change TP1	17		52655	Baseplate change TP 1	0		146089	7	2020-02-10 18:00:07	2020-02-10 18:00:07	2020-07-17 12:52:32	NO001	6	6	1	1	2909600C-4A81-4A83-B5B9-34DC378F84F0.JPEG	2020-02-10 18:31:00	2020-02-10 18:31:00	2020-02-10 18:31:00	2020	2	10	1	1	C81ADCB8-EBE2-4A37-BF74-71D85B4CECB8.JPEG	2020-02-10 18:31:00	2020-02-10 18:31:00	2020-02-10 18:31:00	2020	2	10
16	CP288	86	Prod	1173	82	1003	25	NO001	NO001	World	11448	Product change TP1	0	6993	APP_PRODUCTCHANGE_TP_1	Product change TP1	17		52655	Baseplate change TP 1	0		146161	8	2020-02-11 19:00:11	2020-02-11 19:00:11	2020-07-17 12:52:32	NO001	7	7	1	1	7DFF6BB8-5929-49DD-A1D9-AA2627BB5E0A.JPEG	2020-02-11 18:59:00	2020-02-11 18:59:00	2020-02-11 18:59:00	2020	2	11	1	1	4E33A762-38C4-4569-A005-DD42177F34B0.JPEG	2020-02-11 19:00:00	2020-02-11 19:00:00	2020-02-11 19:00:00	2020	2	11
16	CP288	86	Prod	1173	82	1003	25	NO001	NO001	World	11448	Product change TP1	0	6993	APP_PRODUCTCHANGE_TP_1	Product change TP1	17		52655	Baseplate change TP 1	0		146434	9	2020-02-12 21:00:11	2020-02-12 21:00:11	2020-07-17 12:52:32	NO001	8	8	1	1	E2CA2EBB-1A00-4091-A554-B704279BA153.JPEG	2020-02-12 21:01:00	2020-02-12 21:01:00	2020-02-12 21:01:00	2020	2	12	1	1	6694D3F0-8D04-4988-A9BC-F1AFE9208020.JPEG	2020-02-12 21:02:00	2020-02-12 21:02:00	2020-02-12 21:02:00	2020	2	12
16	CP288	86	Prod	1173	82	1003	25	NO001	NO001	World	11448	Product change TP1	0	6993	APP_PRODUCTCHANGE_TP_1	Product change TP1	17		52655	Baseplate change TP 1	0		146455	10	2020-02-13 18:00:06	2020-02-13 18:00:06	2020-07-17 12:52:32	NO001	9	9	1	1	AD924963-39A7-4591-ACD0-311DEB5F6870.JPEG	2020-02-13 18:36:00	2020-02-13 18:36:00	2020-02-13 18:36:00	2020	2	13	1	1	070D2ADF-0A04-4C1C-B32B-038B33B520DA.JPEG	2020-02-13 18:36:00	2020-02-13 18:36:00	2020-02-13 18:36:00	2020	2	13
16	CP288	86	Prod	1173	82	1003	25	NO001	NO001	World	11448	Product change TP1	0	6993	APP_PRODUCTCHANGE_TP_1	Product change TP1	17		52655	Baseplate change TP 1	0		146491	11	2020-02-14 17:00:07	2020-02-14 17:00:07	2020-07-17 12:52:32	NO001	10	10	1	1	36EABAFB-B5F6-440D-8D4A-2CB812C0E545.JPEG	2020-02-14 17:40:00	2020-02-14 17:40:00	2020-02-14 17:40:00	2020	2	14	1	1	31E23217-06D1-44BC-BC5A-02F388C4B290.JPEG	2020-02-14 17:40:00	2020-02-14 17:40:00	2020-02-14 17:40:00	2020	2	14
16	CP288	86	Prod	1173	82	1003	25	NO001	NO001	World	11448	Product change TP1	0	6993	APP_PRODUCTCHANGE_TP_1	Product change TP1	17		52655	Baseplate change TP 1	0		146559	12	2020-02-16 17:00:15	2020-02-16 17:00:15	2020-07-17 12:52:32	NO001	11	11	1	1	063671A3-1830-4BA1-8169-1DEB55F78D11.JPEG	2020-02-16 17:05:00	2020-02-16 17:05:00	2020-02-16 17:05:00	2020	2	16	1	1	B056CA18-80B4-472A-B274-4964027A119D.JPEG	2020-02-16 17:05:00	2020-02-16 17:05:00	2020-02-16 17:05:00	2020	2	16
16	CP288	86	Prod	1173	82	1003	25	NO001	NO001	World	11448	Product change TP1	0	6993	APP_PRODUCTCHANGE_TP_1	Product change TP1	17		52655	Baseplate change TP 1	0		146626	13	2020-02-17 18:00:09	2020-02-17 18:00:09	2020-07-17 12:52:32	NO001	12	12	1	1	EF2B123F-E8D3-4319-94D9-BCE66320825E.JPEG	2020-02-17 18:03:00	2020-02-17 18:03:00	2020-02-17 18:03:00	2020	2	17	1	1	993A4E63-A4A6-4731-B1EE-9510AA1C513D.JPEG	2020-02-17 18:03:00	2020-02-17 18:03:00	2020-02-17 18:03:00	2020	2	17
16	CP288	86	Prod	1173	82	1003	25	NO001	NO001	World	11448	Product change TP1	0	6993	APP_PRODUCTCHANGE_TP_1	Product change TP1	17		52655	Baseplate change TP 1	0		149512	14	2020-02-18 20:00:05	2020-02-18 20:00:05	2020-07-17 12:52:32	NO001	13	13	1	1	5463CE86-E9D4-43B9-A0D6-454298AE98B2.JPEG	2020-02-18 20:22:00	2020-02-18 20:22:00	2020-02-18 20:22:00	2020	2	18	1	1	0A45D63D-C81A-40A8-A7B1-B3B98E21A90C.JPEG	2020-02-18 20:22:00	2020-02-18 20:22:00	2020-02-18 20:22:00	2020	2	18
16	CP288	86	Prod	1173	82	1003	25	NO001	NO001	World	11448	Product change TP1	0	6993	APP_PRODUCTCHANGE_TP_1	Product change TP1	17		52655	Baseplate change TP 1	0		150463	15	2020-02-19 18:00:10	2020-02-19 18:00:10	2020-07-17 12:52:32	NO001	14	14	1	1	8107034B-D9CE-4B64-A04D-0E5E52C5F62D.JPEG	2020-02-19 18:32:00	2020-02-19 18:32:00	2020-02-19 18:32:00	2020	2	19	1	1	B39CBFA0-0F3A-4405-A942-B4558DAF0DBA.JPEG	2020-02-19 18:32:00	2020-02-19 18:32:00	2020-02-19 18:32:00	2020	2	19
16	CP288	86	Prod	1173	82	1003	25	NO001	NO001	World	11448	Product change TP1	0	6993	APP_PRODUCTCHANGE_TP_1	Product change TP1	17		52655	Baseplate change TP 1	0		152558	16	2020-02-20 20:00:14	2020-02-20 20:00:14	2020-07-17 12:52:32	NO001	15	15	1	1	AAA76A52-7900-4633-AE33-EDE79560148C.JPEG	2020-02-20 18:24:00	2020-02-20 18:24:00	2020-02-20 18:24:00	2020	2	20	1	1	9B71B3EC-0C82-4402-A001-13FCFC692536.JPEG	2020-02-20 18:24:00	2020-02-20 18:24:00	2020-02-20 18:24:00	2020	2	20
16	CP288	86	Prod	1173	82	1003	25	NO001	NO001	World	11448	Product change TP1	0	6993	APP_PRODUCTCHANGE_TP_1	Product change TP1	17		52655	Baseplate change TP 1	0		153165	17	2020-02-24 18:00:08	2020-02-24 18:00:08	2020-07-17 12:52:32	NO001	17	17	1	1	34DE2326-237D-4F04-8217-B09BAB82563C.JPEG	2020-02-24 18:49:00	2020-02-24 18:49:00	2020-02-24 18:49:00	2020	2	24	1	1	646EACCB-C31F-486F-9EAE-EA3F248021E0.JPEG	2020-02-24 18:49:00	2020-02-24 18:49:00	2020-02-24 18:49:00	2020	2	24
16	CP288	86	Prod	1173	82	1003	25	NO001	NO001	World	11448	Product change TP1	0	6993	APP_PRODUCTCHANGE_TP_1	Product change TP1	17		52655	Baseplate change TP 1	0		154288	18	2020-02-25 18:00:15	2020-02-25 18:00:15	2020-07-17 12:52:32	NO001	18	18	1	1	4BAC6851-1709-4A15-A9BB-2D619B6BC8DB.JPEG	2020-02-25 18:54:00	2020-02-25 18:54:00	2020-02-25 18:54:00	2020	2	25	1	1	FDAF7933-0726-449D-9282-2D24C38269AA.JPEG	2020-02-25 18:54:00	2020-02-25 18:54:00	2020-02-25 18:54:00	2020	2	25
16	CP288	86	Prod	1173	82	1003	25	NO001	NO001	World	11448	Product change TP1	0	6993	APP_PRODUCTCHANGE_TP_1	Product change TP1	17		52655	Baseplate change TP 1	0		154539	19	2020-02-26 21:00:04	2020-02-26 21:00:04	2020-07-17 12:52:32	NO001	19	19	1	1	FEFBC43E-09B4-445B-BB28-DE5B6A538591.JPEG	2020-02-26 21:01:00	2020-02-26 21:01:00	2020-02-26 21:01:00	2020	2	26	1	1	413092B3-1E1B-4FB9-8674-BE8B954908F9.JPEG	2020-02-26 21:01:00	2020-02-26 21:01:00	2020-02-26 21:01:00	2020	2	26
16	CP288	86	Prod	1173	82	1003	25	NO001	NO001	World	11448	Product change TP1	0	6993	APP_PRODUCTCHANGE_TP_1	Product change TP1	17		52655	Baseplate change TP 1	0		154638	20	2020-02-27 16:00:27	2020-02-27 16:00:27	2020-07-17 12:52:32	NO001	20	20	1	1	00D99405-4A3E-43D2-9DCA-9D89034846CE.JPEG	2020-02-27 16:53:00	2020-02-27 16:53:00	2020-02-27 16:53:00	2020	2	27	1	1	C560BBE5-FD54-4C15-838B-683213BF1F7D.JPEG	2020-02-27 16:53:00	2020-02-27 16:53:00	2020-02-27 16:53:00	2020	2	27
16	CP288	86	Prod	1173	82	1003	25	NO001	NO001	World	11448	Product change TP1	0	6993	APP_PRODUCTCHANGE_TP_1	Product change TP1	17		52655	Baseplate change TP 1	0		154763	21	2020-02-28 17:00:21	2020-02-28 17:00:21	2020-07-17 12:52:32	NO001	21	21	1	1	4167080E-0EA1-4835-BCAE-3BD14AF31080.JPEG	2020-02-28 17:47:00	2020-02-28 17:47:00	2020-02-28 17:47:00	2020	2	28	1	1	E4E7E893-57F2-4E06-BC29-EAE3BEBB431A.JPEG	2020-02-28 17:48:00	2020-02-28 17:48:00	2020-02-28 17:48:00	2020	2	28
16	CP288	86	Prod	1173	82	1003	25	NO001	NO001	World	11448	Product change TP1	0	6993	APP_PRODUCTCHANGE_TP_1	Product change TP1	17		52655	Baseplate change TP 1	0		154822	22	2020-02-29 14:01:00	2020-02-29 14:01:00	2020-07-17 12:52:32	NO001	22	22	1	1	7FFC83DB-BAB1-4E67-9DCE-2DF7B942F471.JPEG	2020-02-29 14:18:00	2020-02-29 14:18:00	2020-02-29 14:18:00	2020	2	29	1	1	C0970C7D-AE11-4F19-84EE-6DD6D966F1A9.JPEG	2020-02-29 14:19:00	2020-02-29 14:19:00	2020-02-29 14:19:00	2020	2	29
16	CP288	86	Prod	1173	82	1003	25	NO001	NO001	World	11448	Product change TP1	0	6993	APP_PRODUCTCHANGE_TP_1	Product change TP1	17		52655	Baseplate change TP 1	0		154906	23	2020-03-01 16:00:02	2020-03-01 16:00:02	2020-07-17 12:52:32	NO001	23	23	1	1	FF8DB280-1F9F-450B-99ED-B970E7E93383.JPEG	2020-03-01 16:38:00	2020-03-01 16:38:00	2020-03-01 16:38:00	2020	3	1	1	1	EB16A423-758F-4399-974D-80110D81E8B7.JPEG	2020-03-01 16:38:00	2020-03-01 16:38:00	2020-03-01 16:38:00	2020	3	1
16	CP288	86	Prod	1173	82	1003	25	NO001	NO001	World	11448	Product change TP1	0	6993	APP_PRODUCTCHANGE_TP_1	Product change TP1	17		52655	Baseplate change TP 1	0		154999	24	2020-03-02 18:00:04	2020-03-02 18:00:04	2020-07-17 12:52:32	NO001	24	24	1	1	310EB718-28D2-488A-BF8E-F029DD5B5F0C.JPEG	2020-03-02 18:47:00	2020-03-02 18:47:00	2020-03-02 18:47:00	2020	3	2	1	1	3AB2AACB-31C5-4B8E-97EA-9487E244B004.JPEG	2020-03-02 18:47:00	2020-03-02 18:47:00	2020-03-02 18:47:00	2020	3	2
16	CP288	86	Prod	1173	82	1003	25	NO001	NO001	World	11448	Product change TP1	0	6993	APP_PRODUCTCHANGE_TP_1	Product change TP1	17		52655	Baseplate change TP 1	0		156982	25	2020-03-03 20:00:19	2020-03-03 20:00:19	2020-07-17 12:52:32	NO001	25	25	1	1	9372B8AC-6D56-4AD7-A85E-FE25B029F31E.JPEG	2020-03-03 20:18:00	2020-03-03 20:18:00	2020-03-03 20:18:00	2020	3	3	1	1	AA20BE42-0C33-4874-B58B-E4E683F7C48B.JPEG	2020-03-03 20:18:00	2020-03-03 20:18:00	2020-03-03 20:18:00	2020	3	3
16	CP288	86	Prod	1173	82	1003	25	NO001	NO001	World	11448	Product change TP1	0	6993	APP_PRODUCTCHANGE_TP_1	Product change TP1	17		52655	Baseplate change TP 1	0		157792	26	2020-03-04 17:00:14	2020-03-04 17:00:14	2020-07-17 12:52:32	NO001	26	26	1	1	93CE9DDE-971E-4A34-BA7E-F1649D62A9ED.JPEG	2020-03-04 17:15:00	2020-03-04 17:15:00	2020-03-04 17:15:00	2020	3	4	1	1	4D6AF553-4CA1-44F7-BB05-156E90DDD5B3.JPEG	2020-03-04 17:15:00	2020-03-04 17:15:00	2020-03-04 17:15:00	2020	3	4
16	CP288	86	Prod	1173	82	1003	25	NO001	NO001	World	11448	Product change TP1	0	6993	APP_PRODUCTCHANGE_TP_1	Product change TP1	17		52655	Baseplate change TP 1	0		157880	27	2020-03-05 19:00:10	2020-03-05 19:00:10	2020-07-17 12:52:32	NO001	27	27	1	1	CDA344B1-3237-40DD-A5E4-3C8AE42D4375.JPEG	2020-03-05 19:01:00	2020-03-05 19:01:00	2020-03-05 19:01:00	2020	3	5	1	1	B233B5DD-C07E-4517-94AF-E88B5EEB5ECF.JPEG	2020-03-05 19:02:00	2020-03-05 19:02:00	2020-03-05 19:02:00	2020	3	5
16	CP288	86	Prod	1173	82	1003	25	NO001	NO001	World	11448	Product change TP1	0	6993	APP_PRODUCTCHANGE_TP_1	Product change TP1	17		52655	Baseplate change TP 1	0		158008	28	2020-03-07 17:00:09	2020-03-07 17:00:09	2020-07-17 12:52:32	NO001	28	28	1	1	AC13B21F-8991-46A0-91C0-350F1B73FAC5.JPEG	2020-03-07 17:41:00	2020-03-07 17:41:00	2020-03-07 17:41:00	2020	3	7	1	1	0682D3A9-B165-4B6B-BA19-AD8D0C190AC9.JPEG	2020-03-07 17:41:00	2020-03-07 17:41:00	2020-03-07 17:41:00	2020	3	7
16	CP288	86	Prod	1173	82	1003	25	NO001	NO001	World	11448	Product change TP1	0	6993	APP_PRODUCTCHANGE_TP_1	Product change TP1	17		52655	Baseplate change TP 1	0		158082	29	2020-03-08 17:00:12	2020-03-08 17:00:12	2020-07-17 12:52:32	NO001	29	29	1	1	C7BE46A5-4E93-4793-9652-B290F829D4A9.JPEG	2020-03-08 16:32:00	2020-03-08 16:32:00	2020-03-08 16:32:00	2020	3	8	1	1	B80391C4-8054-4836-A75C-7F8C25E1BB93.JPEG	2020-03-08 16:32:00	2020-03-08 16:32:00	2020-03-08 16:32:00	2020	3	8
16	CP288	86	Prod	1173	82	1003	25	NO001	NO001	World	11448	Product change TP1	0	6993	APP_PRODUCTCHANGE_TP_1	Product change TP1	17		52655	Baseplate change TP 1	0		158271	30	2020-03-09 20:00:09	2020-03-09 20:00:09	2020-07-17 12:52:32	NO001	30	30	1	1	773E5E50-F63F-4F1F-91F4-E1A556247D5A.JPEG	2020-03-09 20:04:00	2020-03-09 20:04:00	2020-03-09 20:04:00	2020	3	9	1	1	25C8D02E-B577-4349-AC46-F3256CF93020.JPEG	2020-03-09 20:04:00	2020-03-09 20:04:00	2020-03-09 20:04:00	2020	3	9
16	CP288	86	Prod	1173	82	1003	25	NO001	NO001	World	11448	Product change TP1	0	6993	APP_PRODUCTCHANGE_TP_1	Product change TP1	17		52655	Baseplate change TP 1	0		158337	31	2020-03-10 18:00:18	2020-03-10 18:00:18	2020-07-17 12:52:32	NO001	31	31	1	1	1F18EC46-4F85-46AA-93F8-419A4E3907D0.JPEG	2020-03-10 18:43:00	2020-03-10 18:43:00	2020-03-10 18:43:00	2020	3	10	1	1	96FA9B8B-4D23-45BD-9C0B-BD6FBC3561D0.JPEG	2020-03-10 18:43:00	2020-03-10 18:43:00	2020-03-10 18:43:00	2020	3	10
16	CP288	86	Prod	1173	82	1003	25	NO001	NO001	World	11448	Product change TP1	0	6993	APP_PRODUCTCHANGE_TP_1	Product change TP1	17		52655	Baseplate change TP 1	0		158465	32	2020-03-11 21:00:19	2020-03-11 21:00:19	2020-07-17 12:52:32	NO001	32	32	1	1	D968C337-404A-4600-B284-2728DB4C5E91.JPEG	2020-03-11 21:01:00	2020-03-11 21:01:00	2020-03-11 21:01:00	2020	3	11	1	1	FCC5FC81-2A8E-4800-BADD-778B445D079E.JPEG	2020-03-11 21:01:00	2020-03-11 21:01:00	2020-03-11 21:01:00	2020	3	11
16	CP288	86	Prod	1173	82	1003	25	NO001	NO001	World	11449	Product change TP2	0	6994	APP_PRODUCTCHANGE_TP_2	Product change TP2	19		52656	Baseplate change TP 1	0		158654	2	2020-03-12 19:00:12	2020-03-12 19:00:12	2020-07-17 12:52:32	NO001	35	35	1	1	233094B7-2BFD-4892-951B-F265AFB18FC9.JPEG	2020-03-12 19:11:00	2020-03-12 19:11:00	2020-03-12 19:11:00	2020	3	12	1	1	08F0A559-7DB3-4D6B-B7BE-2D59833C788C.JPEG	2020-03-12 19:11:00	2020-03-12 19:11:00	2020-03-12 19:11:00	2020	3	12
16	CP288	86	Prod	1173	82	1003	25	NO001	NO001	World	11449	Product change TP2	0	6994	APP_PRODUCTCHANGE_TP_2	Product change TP2	19		52656	Baseplate change TP 1	0		158711	3	2020-03-13 18:00:02	2020-03-13 18:00:02	2020-07-17 12:52:32	NO001	37	37	1	1	39CA4DF5-EDE0-47A5-B53E-882C97745B2D.JPEG	2020-03-13 18:15:00	2020-03-13 18:15:00	2020-03-13 18:15:00	2020	3	13	1	1	29708031-0FC4-425E-B296-7C9AC76916C8.JPEG	2020-03-13 18:15:00	2020-03-13 18:15:00	2020-03-13 18:15:00	2020	3	13
16	CP288	86	Prod	1173	82	1003	25	NO001	NO001	World	11449	Product change TP2	0	6994	APP_PRODUCTCHANGE_TP_2	Product change TP2	19		52656	Baseplate change TP 1	0		158993	4	2020-03-15 18:00:12	2020-03-15 18:00:12	2020-07-17 12:52:32	NO001	39	39	1	1	00458DF9-BB55-4D1D-AD06-324C3B1D6882.JPEG	2020-03-15 18:04:00	2020-03-15 18:04:00	2020-03-15 18:04:00	2020	3	15	1	1	ADD41B57-78E7-43BB-A931-BB44458CC8A8.JPEG	2020-03-15 18:04:00	2020-03-15 18:04:00	2020-03-15 18:04:00	2020	3	15
16	CP288	86	Prod	1173	82	1003	25	NO001	NO001	World	11449	Product change TP2	0	6994	APP_PRODUCTCHANGE_TP_2	Product change TP2	19		52656	Baseplate change TP 1	0		159996	5	2020-03-16 17:00:19	2020-03-16 17:00:19	2020-07-17 12:52:32	NO001	40	40	1	1	5B812DE5-04A3-415C-891A-85DB2D6F682F.JPEG	2020-03-16 17:45:00	2020-03-16 17:45:00	2020-03-16 17:45:00	2020	3	16	1	1	BA4D35D3-3388-4016-BA32-FC3B9907CA4F.JPEG	2020-03-16 17:45:00	2020-03-16 17:45:00	2020-03-16 17:45:00	2020	3	16
16	CP288	86	Prod	1173	82	1003	25	NO001	NO001	World	11449	Product change TP2	0	6994	APP_PRODUCTCHANGE_TP_2	Product change TP2	19		52656	Baseplate change TP 1	0		161230	6	2020-03-17 18:00:21	2020-03-17 18:00:21	2020-07-17 12:52:32	NO001	42	42	1	1	13366C47-2B2B-426D-9F6C-70269FD30468.JPEG	2020-03-17 18:45:00	2020-03-17 18:45:00	2020-03-17 18:45:00	2020	3	17	1	1	BD86E486-9B87-4EAC-865F-35D700FE93C3.JPEG	2020-03-17 18:45:00	2020-03-17 18:45:00	2020-03-17 18:45:00	2020	3	17
16	CP288	86	Prod	1173	82	1003	25	NO001	NO001	World	11449	Product change TP2	0	6994	APP_PRODUCTCHANGE_TP_2	Product change TP2	19		52656	Baseplate change TP 1	0		161712	7	2020-03-18 19:00:10	2020-03-18 19:00:10	2020-07-17 12:52:32	NO001	43	43	1	1	FDEAAC0C-3DC1-4A11-912E-DF05E4BE1165.JPEG	2020-03-18 18:45:00	2020-03-18 18:45:00	2020-03-18 18:45:00	2020	3	18	1	1	441A6836-931B-45E8-969C-5E80BFB5B132.JPEG	2020-03-18 18:46:00	2020-03-18 18:46:00	2020-03-18 18:46:00	2020	3	18
16	CP288	86	Prod	1173	82	1003	25	NO001	NO001	World	11449	Product change TP2	0	6994	APP_PRODUCTCHANGE_TP_2	Product change TP2	19		52656	Baseplate change TP 1	0		162069	8	2020-03-19 18:00:06	2020-03-19 18:00:06	2020-07-17 12:52:32	NO001	44	44	1	1	0C711A7D-927A-45D9-B4AA-0D03FB1A67A3.JPEG	2020-03-19 18:35:00	2020-03-19 18:35:00	2020-03-19 18:35:00	2020	3	19	1	1	0478CB92-37D5-4EAC-A6C5-8924646AF528.JPEG	2020-03-19 18:35:00	2020-03-19 18:35:00	2020-03-19 18:35:00	2020	3	19
16	CP288	86	Prod	1173	82	1003	25	NO001	NO001	World	11449	Product change TP2	0	6994	APP_PRODUCTCHANGE_TP_2	Product change TP2	19		52656	Baseplate change TP 1	0		162682	9	2020-03-20 18:00:09	2020-03-20 18:00:09	2020-07-17 12:52:32	NO001	46	46	1	1	E78AB025-825E-464A-B340-8E772BA98E95.JPEG	2020-03-20 18:24:00	2020-03-20 18:24:00	2020-03-20 18:24:00	2020	3	20	1	1	FC29116A-2C7A-4806-BE75-840462968896.JPEG	2020-03-20 18:24:00	2020-03-20 18:24:00	2020-03-20 18:24:00	2020	3	20
16	CP288	86	Prod	1173	82	1003	25	NO001	NO001	World	11449	Product change TP2	0	6994	APP_PRODUCTCHANGE_TP_2	Product change TP2	19		52656	Baseplate change TP 1	0		162732	10	2020-03-21 19:00:05	2020-03-21 19:00:05	2020-07-17 12:52:32	NO001	47	47	1	1	F13B7F6F-ED38-475F-88E1-D97D3615680B.JPEG	2020-03-21 19:11:00	2020-03-21 19:11:00	2020-03-21 19:11:00	2020	3	21	1	1	266D73DF-C160-4A5F-94A5-CC558A6C47F4.JPEG	2020-03-21 19:12:00	2020-03-21 19:12:00	2020-03-21 19:12:00	2020	3	21
16	CP288	86	Prod	1173	82	1003	25	NO001	NO001	World	11449	Product change TP2	0	6994	APP_PRODUCTCHANGE_TP_2	Product change TP2	19		52656	Baseplate change TP 1	0		162795	11	2020-03-22 18:00:39	2020-03-22 18:00:39	2020-07-17 12:52:32	NO001	48	48	1	1	BF0AB756-1AE3-478D-975A-BC0561CB3E14.JPEG	2020-03-22 17:18:00	2020-03-22 17:18:00	2020-03-22 17:18:00	2020	3	22	1	1	F16FD42A-A3BB-4FD0-BF34-C00D16B94260.JPEG	2020-03-22 17:18:00	2020-03-22 17:18:00	2020-03-22 17:18:00	2020	3	22
16	CP288	86	Prod	1173	82	1003	25	NO001	NO001	World	11449	Product change TP2	0	6994	APP_PRODUCTCHANGE_TP_2	Product change TP2	19		52656	Baseplate change TP 1	0		163392	12	2020-03-23 20:00:05	2020-03-23 20:00:05	2020-07-17 12:52:32	NO001	49	49	1	1	4DAC657B-8CA5-4D65-8B22-B832BA3E046E.JPEG	2020-03-23 20:22:00	2020-03-23 20:22:00	2020-03-23 20:22:00	2020	3	23	1	1	71A4BAA4-B488-4C5E-B284-64444B06F8EA.JPEG	2020-03-23 20:23:00	2020-03-23 20:23:00	2020-03-23 20:23:00	2020	3	23
16	CP288	86	Prod	1173	82	1003	25	NO001	NO001	World	11449	Product change TP2	0	6994	APP_PRODUCTCHANGE_TP_2	Product change TP2	19		52656	Baseplate change TP 1	0		163497	13	2020-03-24 20:00:10	2020-03-24 20:00:10	2020-07-17 12:52:32	NO001	50	50	1	1	2C58C336-AC92-4E45-8A1B-CCF9218C0D4A.JPEG	2020-03-24 20:35:00	2020-03-24 20:35:00	2020-03-24 20:35:00	2020	3	24	1	1	64B43231-41FA-46AE-BFF4-B4C634DFDA05.JPEG	2020-03-24 20:35:00	2020-03-24 20:35:00	2020-03-24 20:35:00	2020	3	24
16	CP288	86	Prod	1173	82	1003	25	NO001	NO001	World	11449	Product change TP2	0	6994	APP_PRODUCTCHANGE_TP_2	Product change TP2	19		52656	Baseplate change TP 1	0		163832	14	2020-03-25 18:00:04	2020-03-25 18:00:04	2020-07-17 12:52:32	NO001	51	51	1	1	8EB84786-9583-49EE-9972-9748D0972626.JPEG	2020-03-25 18:50:00	2020-03-25 18:50:00	2020-03-25 18:50:00	2020	3	25	1	1	08AED565-BD95-4843-ADAD-B8CA54DC2060.JPEG	2020-03-25 18:50:00	2020-03-25 18:50:00	2020-03-25 18:50:00	2020	3	25
16	CP288	86	Prod	1173	82	1003	25	NO001	NO001	World	11449	Product change TP2	0	6994	APP_PRODUCTCHANGE_TP_2	Product change TP2	19		52656	Baseplate change TP 1	0		164105	15	2020-03-26 19:00:05	2020-03-26 19:00:05	2020-07-17 12:52:32	NO001	52	52	1	1	15D633C9-747B-4F5A-A35B-759BF2230ECE.JPEG	2020-03-26 19:16:00	2020-03-26 19:16:00	2020-03-26 19:16:00	2020	3	26	1	1	EF752DF3-4DA8-4C7E-B070-2B8B24D76E31.JPEG	2020-03-26 19:16:00	2020-03-26 19:16:00	2020-03-26 19:16:00	2020	3	26
16	CP288	86	Prod	1173	82	1003	25	NO001	NO001	World	11449	Product change TP2	0	6994	APP_PRODUCTCHANGE_TP_2	Product change TP2	19		52656	Baseplate change TP 1	0		164541	16	2020-03-27 18:00:04	2020-03-27 18:00:04	2020-07-17 12:52:32	NO001	53	53	1	1	86DFD1D8-5CA9-4437-99FA-2F1A002A7EC4.JPEG	2020-03-27 18:01:00	2020-03-27 18:01:00	2020-03-27 18:01:00	2020	3	27	1	1	D3CCD865-0E06-458D-B2B9-14E94FD8EABB.JPEG	2020-03-27 18:01:00	2020-03-27 18:01:00	2020-03-27 18:01:00	2020	3	27
16	CP288	86	Prod	1173	82	1003	25	NO001	NO001	World	11449	Product change TP2	0	6994	APP_PRODUCTCHANGE_TP_2	Product change TP2	19		52656	Baseplate change TP 1	0		164656	17	2020-03-29 16:00:06	2020-03-29 16:00:06	2020-07-17 12:52:32	NO001	54	54	1	1	AF909392-2CEF-4C35-8C58-CCFCD132A140.JPEG	2020-03-29 17:27:00	2020-03-29 17:27:00	2020-03-29 17:27:00	2020	3	29	1	1	46C3291F-00FE-4B3D-8BC2-B75A189F3FEF.JPEG	2020-03-29 17:27:00	2020-03-29 17:27:00	2020-03-29 17:27:00	2020	3	29
16	CP288	86	Prod	1173	82	1003	25	NO001	NO001	World	11449	Product change TP2	0	6994	APP_PRODUCTCHANGE_TP_2	Product change TP2	19		52656	Baseplate change TP 1	0		164902	18	2020-03-30 17:00:09	2020-03-30 17:00:09	2020-07-17 12:52:32	NO001	55	55	1	1	6B1FBEB3-9EC9-477E-AAAE-0FAFEDAB60F9.JPEG	2020-03-30 18:33:00	2020-03-30 18:33:00	2020-03-30 18:33:00	2020	3	30	1	1	A8E0F158-7DD1-4A1D-93F6-C42944B8461A.JPEG	2020-03-30 18:33:00	2020-03-30 18:33:00	2020-03-30 18:33:00	2020	3	30
16	CP288	86	Prod	1173	82	1003	25	NO001	NO001	World	11449	Product change TP2	0	6994	APP_PRODUCTCHANGE_TP_2	Product change TP2	19		52656	Baseplate change TP 1	0		165296	19	2020-03-31 20:00:18	2020-03-31 20:00:18	2020-07-17 12:52:32	NO001	56	56	1	1	448C8CF9-765D-422C-953E-0280937DA71D.JPEG	2020-03-31 20:57:00	2020-03-31 20:57:00	2020-03-31 20:57:00	2020	3	31	1	1	42AFB7B8-75E7-412E-BE8F-4A75FE3667B8.JPEG	2020-03-31 20:58:00	2020-03-31 20:58:00	2020-03-31 20:58:00	2020	3	31
16	CP288	86	Prod	1173	82	1003	25	NO001	NO001	World	11449	Product change TP2	0	6994	APP_PRODUCTCHANGE_TP_2	Product change TP2	19		52656	Baseplate change TP 1	0		168351	20	2020-04-01 18:00:14	2020-04-01 18:00:14	2020-07-17 12:52:32	NO001	57	57	1	1	BA582CF7-1727-4AC7-9F6D-88F7E56B5EEB.JPEG	2020-04-01 18:52:00	2020-04-01 18:52:00	2020-04-01 18:52:00	2020	4	1	1	1	899294C6-CAAF-48F4-8E61-7FFC67BBA7C2.JPEG	2020-04-01 18:52:00	2020-04-01 18:52:00	2020-04-01 18:52:00	2020	4	1
16	CP288	86	Prod	1173	82	1003	25	NO001	NO001	World	11449	Product change TP2	0	6994	APP_PRODUCTCHANGE_TP_2	Product change TP2	19		52656	Baseplate change TP 1	0		168467	21	2020-04-02 18:00:04	2020-04-02 18:00:04	2020-07-17 12:52:32	NO001	58	58	1	1	B01C86C5-A821-4695-85C4-3972CCD10607.JPEG	2020-04-02 18:56:00	2020-04-02 18:56:00	2020-04-02 18:56:00	2020	4	2	1	1	0EDEEB38-F260-4F2C-908B-99F7453070DE.JPEG	2020-04-02 18:56:00	2020-04-02 18:56:00	2020-04-02 18:56:00	2020	4	2
16	CP288	86	Prod	1173	82	1003	25	NO001	NO001	World	11449	Product change TP2	0	6994	APP_PRODUCTCHANGE_TP_2	Product change TP2	19		52656	Baseplate change TP 1	0		168619	22	2020-04-03 17:00:33	2020-04-03 17:00:33	2020-07-17 12:52:32	NO001	59	59	1	1	5D8F5468-A7DC-4074-BBC0-CA2093FCEF3E.JPEG	2020-04-03 18:07:00	2020-04-03 18:07:00	2020-04-03 18:07:00	2020	4	3	1	1	642B8FC5-D9D7-448C-A769-408F938B381D.JPEG	2020-04-03 18:07:00	2020-04-03 18:07:00	2020-04-03 18:07:00	2020	4	3
16	CP288	86	Prod	1173	82	1003	25	NO001	NO001	World	11449	Product change TP2	0	6994	APP_PRODUCTCHANGE_TP_2	Product change TP2	19		52656	Baseplate change TP 1	0		168666	23	2020-04-04 15:00:09	2020-04-04 15:00:09	2020-07-17 12:52:32	NO001	60	60	1	1	E11DFFB5-3C8B-4713-BF95-5EA9E0EBCCEC.JPEG	2020-04-04 14:27:00	2020-04-04 14:27:00	2020-04-04 14:27:00	2020	4	4	1	1	9D4A9C89-3002-4245-9421-D16693A25DCE.JPEG	2020-04-04 14:27:00	2020-04-04 14:27:00	2020-04-04 14:27:00	2020	4	4
16	CP288	86	Prod	1173	82	1003	25	NO001	NO001	World	11449	Product change TP2	0	6994	APP_PRODUCTCHANGE_TP_2	Product change TP2	19		52656	Baseplate change TP 1	0		168816	24	2020-04-05 17:00:11	2020-04-05 17:00:11	2020-07-17 12:52:32	NO001	61	61	1	1	534FBADD-2D51-4E09-AA1F-1788C898B381.JPEG	2020-04-05 16:42:00	2020-04-05 16:42:00	2020-04-05 16:42:00	2020	4	5	1	1	0C1F7ECC-5A81-4042-ABD7-E93F0D5AEBA5.JPEG	2020-04-05 16:42:00	2020-04-05 16:42:00	2020-04-05 16:42:00	2020	4	5
16	CP288	86	Prod	1173	82	1003	25	NO001	NO001	World	11449	Product change TP2	0	6994	APP_PRODUCTCHANGE_TP_2	Product change TP2	19		52656	Baseplate change TP 1	0		168905	25	2020-04-06 17:00:04	2020-04-06 17:00:04	2020-07-17 12:52:32	NO001	62	62	1	1	747D9695-316C-4AA8-8123-7DBCB2F7B93D.JPEG	2020-04-06 18:54:00	2020-04-06 18:54:00	2020-04-06 18:54:00	2020	4	6	1	1	A5DE0789-FFF2-458E-8DAC-8180CBEA9C0B.JPEG	2020-04-06 18:54:00	2020-04-06 18:54:00	2020-04-06 18:54:00	2020	4	6
16	CP288	86	Prod	1173	82	1003	25	NO001	NO001	World	11449	Product change TP2	0	6994	APP_PRODUCTCHANGE_TP_2	Product change TP2	19		52656	Baseplate change TP 1	0		169153	26	2020-04-07 19:00:12	2020-04-07 19:00:12	2020-07-17 12:52:32	NO001	63	63	1	1	4D8076E8-0A60-4A79-A780-4019D1AEC8C8.JPEG	2020-04-07 20:37:00	2020-04-07 20:37:00	2020-04-07 20:37:00	2020	4	7	1	1	DAC36B6A-AEB8-4272-96E6-959ABC445F07.JPEG	2020-04-07 20:38:00	2020-04-07 20:38:00	2020-04-07 20:38:00	2020	4	7
16	CP288	86	Prod	1173	82	1003	25	NO001	NO001	World	11449	Product change TP2	0	6994	APP_PRODUCTCHANGE_TP_2	Product change TP2	19		52656	Baseplate change TP 1	0		169284	27	2020-04-08 19:00:25	2020-04-08 19:00:25	2020-07-17 12:52:32	NO001	64	64	1	1	63EEDD05-A277-4179-B48E-AAFA7AB7D2EB.JPEG	2020-04-08 18:22:00	2020-04-08 18:22:00	2020-04-08 18:22:00	2020	4	8	1	1	41837143-B7DC-4BAC-A0B4-A4F05D754E11.JPEG	2020-04-08 18:22:00	2020-04-08 18:22:00	2020-04-08 18:22:00	2020	4	8
16	CP288	86	Prod	1173	82	1003	25	NO001	NO001	World	11449	Product change TP2	0	6994	APP_PRODUCTCHANGE_TP_2	Product change TP2	19		52656	Baseplate change TP 1	0		169350	28	2020-04-09 18:00:48	2020-04-09 18:00:48	2020-07-17 12:52:32	NO001	65	65	1	1	F8D978D5-B5CD-497A-8E40-D913A0C27E98.JPEG	2020-04-09 18:54:00	2020-04-09 18:54:00	2020-04-09 18:54:00	2020	4	9	1	1	97025CC9-D4D2-4A68-92AA-C1C2144AC606.JPEG	2020-04-09 18:54:00	2020-04-09 18:54:00	2020-04-09 18:54:00	2020	4	9
16	CP288	86	Prod	1173	82	1003	25	NO001	NO001	World	11449	Product change TP2	0	6994	APP_PRODUCTCHANGE_TP_2	Product change TP2	19		52656	Baseplate change TP 1	0		169409	29	2020-04-10 17:00:05	2020-04-10 17:00:05	2020-07-17 12:52:32	NO001	66	66	1	1	34614E9B-5FB2-423C-AE15-F502ABD9522C.JPEG	2020-04-10 18:24:00	2020-04-10 18:24:00	2020-04-10 18:24:00	2020	4	10	1	1	189FBA1C-8A61-4902-A5A9-46646685394F.JPEG	2020-04-10 18:24:00	2020-04-10 18:24:00	2020-04-10 18:24:00	2020	4	10
16	CP288	86	Prod	1173	82	1003	25	NO001	NO001	World	11449	Product change TP2	0	6994	APP_PRODUCTCHANGE_TP_2	Product change TP2	19		52656	Baseplate change TP 1	0		169540	30	2020-04-12 16:00:18	2020-04-12 16:00:18	2020-07-17 12:52:32	NO001	67	67	1	1	726D338B-490A-42E5-95AF-F756080A91A7.JPEG	2020-04-12 17:07:00	2020-04-12 17:07:00	2020-04-12 17:07:00	2020	4	12	1	1	340DA1DF-EC1E-436D-92A7-7296570F03A2.JPEG	2020-04-12 17:08:00	2020-04-12 17:08:00	2020-04-12 17:08:00	2020	4	12
16	CP288	86	Prod	1173	82	1003	25	NO001	NO001	World	11449	Product change TP2	0	6994	APP_PRODUCTCHANGE_TP_2	Product change TP2	19		52656	Baseplate change TP 1	0		169619	31	2020-04-13 18:00:06	2020-04-13 18:00:06	2020-07-17 12:52:32	NO001	68	68	1	1	765340A1-7432-4ABC-9F89-1BD36C437DEB.JPEG	2020-04-13 18:57:00	2020-04-13 18:57:00	2020-04-13 18:57:00	2020	4	13	1	1	27DFA74B-7EDB-40D3-AD2C-70CF7AD47F78.JPEG	2020-04-13 18:57:00	2020-04-13 18:57:00	2020-04-13 18:57:00	2020	4	13
16	CP288	86	Prod	1173	82	1003	25	NO001	NO001	World	11449	Product change TP2	0	6994	APP_PRODUCTCHANGE_TP_2	Product change TP2	19		52656	Baseplate change TP 1	0		169975	32	2020-04-14 17:00:05	2020-04-14 17:00:05	2020-07-17 12:52:32	NO001	69	69	1	1	0C04BA1B-7D71-45A8-A3CE-EACA0565FC4E.JPEG	2020-04-14 18:32:00	2020-04-14 18:32:00	2020-04-14 18:32:00	2020	4	14	1	1	36A1E10C-3127-48F6-A309-3591C0CD8070.JPEG	2020-04-14 18:32:00	2020-04-14 18:32:00	2020-04-14 18:32:00	2020	4	14
16	CP288	86	Prod	1173	82	1003	25	NO001	NO001	World	11449	Product change TP2	0	6994	APP_PRODUCTCHANGE_TP_2	Product change TP2	19		52656	Baseplate change TP 1	0		170062	33	2020-04-15 19:00:07	2020-04-15 19:00:07	2020-07-17 12:52:32	NO001	70	70	1	1	79A9441B-719C-425D-91FD-8969479BC5D5.JPEG	2020-04-15 20:37:00	2020-04-15 20:37:00	2020-04-15 20:37:00	2020	4	15	1	1	5E6AB8EF-EED2-4545-8ABA-CA9C02164F4A.JPEG	2020-04-15 20:38:00	2020-04-15 20:38:00	2020-04-15 20:38:00	2020	4	15
16	CP288	86	Prod	1173	82	1003	25	NO001	NO001	World	11449	Product change TP2	0	6994	APP_PRODUCTCHANGE_TP_2	Product change TP2	19		52656	Baseplate change TP 1	0		170465	34	2020-04-16 17:00:55	2020-04-16 17:00:55	2020-07-17 12:52:32	NO001	71	71	1	1	81DDA0B6-F53B-4859-A8D7-5A21374756F5.JPEG	2020-04-16 18:43:00	2020-04-16 18:43:00	2020-04-16 18:43:00	2020	4	16	1	1	F1081444-2AE4-462A-A20B-8FAD1F5B9D50.JPEG	2020-04-16 18:44:00	2020-04-16 18:44:00	2020-04-16 18:44:00	2020	4	16
16	CP288	86	Prod	1173	82	1003	25	NO001	NO001	World	11449	Product change TP2	0	6994	APP_PRODUCTCHANGE_TP_2	Product change TP2	19		52656	Baseplate change TP 1	0		171096	35	2020-04-17 17:00:05	2020-04-17 17:00:05	2020-07-17 12:52:32	NO001	73	73	1	1	5AD0F4D7-C05D-421B-AFD5-9F6AFEBF3535.JPEG	2020-04-17 17:58:00	2020-04-17 17:58:00	2020-04-17 17:58:00	2020	4	17	1	1	98CE0D0E-FE8E-47F8-912D-EE854EBFD671.JPEG	2020-04-17 17:58:00	2020-04-17 17:58:00	2020-04-17 17:58:00	2020	4	17
16	CP288	86	Prod	1173	82	1003	25	NO001	NO001	World	11449	Product change TP2	0	6994	APP_PRODUCTCHANGE_TP_2	Product change TP2	19		52656	Baseplate change TP 1	0		171156	36	2020-04-18 17:00:05	2020-04-18 17:00:05	2020-07-17 12:52:32	NO001	74	74	1	1	A7C4F7E3-C331-4B05-BAD3-0BDB4C3C9EBE.JPEG	2020-04-18 18:49:00	2020-04-18 18:49:00	2020-04-18 18:49:00	2020	4	18	1	1	CA430ECF-EF35-47E4-B934-6FDAF590E46F.JPEG	2020-04-18 18:49:00	2020-04-18 18:49:00	2020-04-18 18:49:00	2020	4	18
16	CP288	86	Prod	1173	82	1003	25	NO001	NO001	World	11449	Product change TP2	0	6994	APP_PRODUCTCHANGE_TP_2	Product change TP2	19		52656	Baseplate change TP 1	0		171244	37	2020-04-19 18:00:12	2020-04-19 18:00:12	2020-07-17 12:52:32	NO001	75	75	1	1	62C7ECA6-47CB-4DA2-B0F5-3F643D2C7BB3.JPEG	2020-04-19 18:58:00	2020-04-19 18:58:00	2020-04-19 18:58:00	2020	4	19	1	1	DB6750D0-D6BC-4A2A-84B9-BE7C5DFF26D2.JPEG	2020-04-19 18:58:00	2020-04-19 18:58:00	2020-04-19 18:58:00	2020	4	19
16	CP288	86	Prod	1173	82	1003	25	NO001	NO001	World	11449	Product change TP2	0	6994	APP_PRODUCTCHANGE_TP_2	Product change TP2	19		52656	Baseplate change TP 1	0		171353	38	2020-04-20 18:00:06	2020-04-20 18:00:06	2020-07-17 12:52:32	NO001	76	76	1	1	3DEDAC0C-3CDD-4801-99E6-9AD74F8611EE.JPEG	2020-04-20 18:50:00	2020-04-20 18:50:00	2020-04-20 18:50:00	2020	4	20	1	1	365058C2-D372-4B5A-A4F1-E351B6754DA1.JPEG	2020-04-20 18:50:00	2020-04-20 18:50:00	2020-04-20 18:50:00	2020	4	20
16	CP288	86	Prod	1173	82	1003	25	NO001	NO001	World	11449	Product change TP2	0	6994	APP_PRODUCTCHANGE_TP_2	Product change TP2	19		52656	Baseplate change TP 1	0		171607	39	2020-04-21 17:00:17	2020-04-21 17:00:17	2020-07-17 12:52:32	NO001	77	77	1	1	A650378E-5F2D-4B5E-98AB-87F99B7FC742.JPEG	2020-04-21 18:23:00	2020-04-21 18:23:00	2020-04-21 18:23:00	2020	4	21	1	1	6B9C2E37-A70F-439A-9999-8BD642F1DF0F.JPEG	2020-04-21 18:23:00	2020-04-21 18:23:00	2020-04-21 18:23:00	2020	4	21
16	CP288	86	Prod	1173	82	1003	25	NO001	NO001	World	11449	Product change TP2	0	6994	APP_PRODUCTCHANGE_TP_2	Product change TP2	19		52656	Baseplate change TP 1	0		171797	40	2020-04-22 17:00:07	2020-04-22 17:00:07	2020-07-17 12:52:32	NO001	78	78	1	1	A2D210C7-810D-460D-B357-D968CB63EBF6.JPEG	2020-04-22 18:37:00	2020-04-22 18:37:00	2020-04-22 18:37:00	2020	4	22	1	1	3F8655B2-1094-4D00-9ECD-66F2772F72D5.JPEG	2020-04-22 18:37:00	2020-04-22 18:37:00	2020-04-22 18:37:00	2020	4	22
16	CP288	86	Prod	1173	82	1003	25	NO001	NO001	World	11449	Product change TP2	0	6994	APP_PRODUCTCHANGE_TP_2	Product change TP2	19		52656	Baseplate change TP 1	0		172290	41	2020-04-23 17:00:09	2020-04-23 17:00:09	2020-07-17 12:52:32	NO001	79	79	1	1	B03F3E50-9ACD-4157-9F6B-7B9EA1F5037C.JPEG	2020-04-23 18:16:00	2020-04-23 18:16:00	2020-04-23 18:16:00	2020	4	23	1	1	5DF23EA0-69F9-41BE-87A4-4E052FF7A101.JPEG	2020-04-23 18:16:00	2020-04-23 18:16:00	2020-04-23 18:16:00	2020	4	23
16	CP288	86	Prod	1174	82	1004	25	NO001	NO001	World	11479	Product change TP1	0	6993	APP_PRODUCTCHANGE_TP_1	Product change TP1	17		52715	Baseplate change TP 1	0		137871	1	2020-02-04 17:00:04	2020-02-04 17:00:04	2020-07-17 12:52:32	NO001	0	0	1	1	326CB9DE-4A44-4712-B211-03BAF71E848C.JPEG	2020-02-04 17:34:00	2020-02-04 17:34:00	2020-02-04 17:34:00	2020	2	4	1	1	CD2EA038-0022-4CF0-B404-D7F968A56882.JPEG	2020-02-04 17:36:00	2020-02-04 17:36:00	2020-02-04 17:36:00	2020	2	4
16	CP288	86	Prod	1174	82	1004	25	NO001	NO001	World	11480	Product change TP2	0	6994	APP_PRODUCTCHANGE_TP_2	Product change TP2	19		52716	Baseplate change TP 1	0		137873	1	2020-03-17 00:00:08	2020-03-17 00:00:08	2020-07-17 12:52:32	NO001	57	57	1	1	6AF22218-F814-4365-A170-A53A6DCEA0F7.JPEG	2020-03-17 00:01:00	2020-03-17 00:01:00	2020-03-17 00:01:00	2020	3	17	1	1	CEDFE9E4-7B15-4B86-8BD8-DEA741D1B71C.JPEG	2020-03-17 00:02:00	2020-03-17 00:02:00	2020-03-17 00:02:00	2020	3	17
16	CP288	86	Prod	1174	82	1004	25	NO001	NO001	World	11479	Product change TP1	0	6993	APP_PRODUCTCHANGE_TP_1	Product change TP1	17		52715	Baseplate change TP 1	0		144787	2	2020-02-04 23:00:09	2020-02-04 23:00:09	2020-07-17 12:52:32	NO001	1	1	1	1	1ED13430-90A1-46BC-8793-119EE1AA7137.JPEG	2020-02-04 23:31:00	2020-02-04 23:31:00	2020-02-04 23:31:00	2020	2	4	1	1	104A3902-7451-4634-A047-C4727029AA9A.JPEG	2020-02-04 23:32:00	2020-02-04 23:32:00	2020-02-04 23:32:00	2020	2	4
16	CP288	86	Prod	1174	82	1004	25	NO001	NO001	World	11479	Product change TP1	0	6993	APP_PRODUCTCHANGE_TP_1	Product change TP1	17		52715	Baseplate change TP 1	0		144798	3	2020-02-05 08:00:09	2020-02-05 08:00:09	2020-07-17 12:52:32	NO001	3	3	1	1	BCA1E3D3-6854-486D-80FB-528D00CD173D.JPEG	2020-02-05 08:14:00	2020-02-05 08:14:00	2020-02-05 08:14:00	2020	2	5	1	1	10D62265-2A48-48AC-8B7D-0DC0F6FE7C1F.JPEG	2020-02-05 08:15:00	2020-02-05 08:15:00	2020-02-05 08:15:00	2020	2	5
16	CP288	86	Prod	1174	82	1004	25	NO001	NO001	World	11479	Product change TP1	0	6993	APP_PRODUCTCHANGE_TP_1	Product change TP1	17		52715	Baseplate change TP 1	0		144906	4	2020-02-05 15:00:03	2020-02-05 15:00:03	2020-07-17 12:52:32	NO001	4	4	1	1	D7977B08-BB47-4C08-AED0-193F441464C8.JPEG	2020-02-05 15:56:00	2020-02-05 15:56:00	2020-02-05 15:56:00	2020	2	5	1	1	831AE929-A997-423F-9558-9259E35BD971.JPEG	2020-02-05 15:56:00	2020-02-05 15:56:00	2020-02-05 15:56:00	2020	2	5
16	CP288	86	Prod	1174	82	1004	25	NO001	NO001	World	11479	Product change TP1	0	6993	APP_PRODUCTCHANGE_TP_1	Product change TP1	17		52715	Baseplate change TP 1	0		145838	5	2020-02-06 10:00:22	2020-02-06 10:00:22	2020-07-17 12:52:32	NO001	5	5	1	1	00DD7BC9-808E-4B5C-8E86-AD56B3D1FEDC.JPEG	2020-02-06 09:22:00	2020-02-06 09:22:00	2020-02-06 09:22:00	2020	2	6	1	1	733BE2DF-4063-411F-8B6A-D2657549DBD5.JPEG	2020-02-06 09:22:00	2020-02-06 09:22:00	2020-02-06 09:22:00	2020	2	6
16	CP288	86	Prod	1174	82	1004	25	NO001	NO001	World	11479	Product change TP1	0	6993	APP_PRODUCTCHANGE_TP_1	Product change TP1	17		52715	Baseplate change TP 1	0		145997	6	2020-02-07 20:00:11	2020-02-07 20:00:11	2020-07-17 12:52:32	NO001	6	6	1	1	7191E34B-4907-4F95-9A3A-AA6A7245CFCA.JPEG	2020-02-07 00:54:00	2020-02-07 00:54:00	2020-02-07 00:54:00	2020	2	7	1	1	627A6B04-C987-425A-836A-CE203357AFA9.JPEG	2020-02-07 00:54:00	2020-02-07 00:54:00	2020-02-07 00:54:00	2020	2	7
16	CP288	86	Prod	1174	82	1004	25	NO001	NO001	World	11479	Product change TP1	0	6993	APP_PRODUCTCHANGE_TP_1	Product change TP1	17		52715	Baseplate change TP 1	0		146000	7	2020-02-07 20:00:22	2020-02-07 20:00:22	2020-07-17 12:52:32	NO001	7	7	1	1	4FCCCBBD-8E6C-427E-B0B4-09C8A199756C.JPEG	2020-02-07 20:21:00	2020-02-07 20:21:00	2020-02-07 20:21:00	2020	2	7	1	1	A415E1F5-6976-43D0-87F0-172490D0FE96.JPEG	2020-02-07 20:22:00	2020-02-07 20:22:00	2020-02-07 20:22:00	2020	2	7
16	CP288	86	Prod	1174	82	1004	25	NO001	NO001	World	11479	Product change TP1	0	6993	APP_PRODUCTCHANGE_TP_1	Product change TP1	17		52715	Baseplate change TP 1	0		146018	8	2020-02-08 18:00:07	2020-02-08 18:00:07	2020-07-17 12:52:32	NO001	9	9	1	1	202CFAF9-027D-45A7-9AFC-090B569A0BFD.JPEG	2020-02-08 17:55:00	2020-02-08 17:55:00	2020-02-08 17:55:00	2020	2	8	1	1	C1EA21CC-FA57-4D03-8F3B-FDA278110D72.JPEG	2020-02-08 17:55:00	2020-02-08 17:55:00	2020-02-08 17:55:00	2020	2	8
16	CP288	86	Prod	1174	82	1004	25	NO001	NO001	World	11479	Product change TP1	0	6993	APP_PRODUCTCHANGE_TP_1	Product change TP1	17		52715	Baseplate change TP 1	0		146041	9	2020-02-09 17:00:08	2020-02-09 17:00:08	2020-07-17 12:52:32	NO001	10	10	1	1	E346AA8A-8217-4A1F-A326-03F3FE37903C.JPEG	2020-02-09 16:48:00	2020-02-09 16:48:00	2020-02-09 16:48:00	2020	2	9	1	1	E462332B-22C1-46C2-89C4-413EC23E7855.JPEG	2020-02-09 16:48:00	2020-02-09 16:48:00	2020-02-09 16:48:00	2020	2	9
16	CP288	86	Prod	1174	82	1004	25	NO001	NO001	World	11479	Product change TP1	0	6993	APP_PRODUCTCHANGE_TP_1	Product change TP1	17		52715	Baseplate change TP 1	0		146098	10	2020-02-10 23:00:04	2020-02-10 23:00:04	2020-07-17 12:52:32	NO001	11	11	1	1	4FE0F2F3-291E-4EB1-8AD5-B551B1674F51.JPEG	2020-02-10 23:43:00	2020-02-10 23:43:00	2020-02-10 23:43:00	2020	2	10	1	1	4898F3D5-5838-4E51-9806-928B0D750889.JPEG	2020-02-10 23:43:00	2020-02-10 23:43:00	2020-02-10 23:43:00	2020	2	10
16	CP288	86	Prod	1174	82	1004	25	NO001	NO001	World	11479	Product change TP1	0	6993	APP_PRODUCTCHANGE_TP_1	Product change TP1	17		52715	Baseplate change TP 1	0		146158	11	2020-02-11 17:00:10	2020-02-11 17:00:10	2020-07-17 12:52:32	NO001	12	12	1	1	DF3ADE84-4472-4304-9EBA-8BC104F80A3A.JPEG	2020-02-11 17:36:00	2020-02-11 17:36:00	2020-02-11 17:36:00	2020	2	11	1	1	ACFD34B9-9EBB-4939-9B56-57AFDF7D4156.JPEG	2020-02-11 17:36:00	2020-02-11 17:36:00	2020-02-11 17:36:00	2020	2	11
16	CP288	86	Prod	1174	82	1004	25	NO001	NO001	World	11479	Product change TP1	0	6993	APP_PRODUCTCHANGE_TP_1	Product change TP1	17		52715	Baseplate change TP 1	0		146419	12	2020-02-12 17:00:05	2020-02-12 17:00:05	2020-07-17 12:52:32	NO001	13	13	1	1	63BB65D5-649E-4734-81A8-AA7274354137.JPEG	2020-02-12 17:44:00	2020-02-12 17:44:00	2020-02-12 17:44:00	2020	2	12	1	1	06828F59-CA80-4FD9-A88C-68182B8CC235.JPEG	2020-02-12 17:44:00	2020-02-12 17:44:00	2020-02-12 17:44:00	2020	2	12
16	CP288	86	Prod	1174	82	1004	25	NO001	NO001	World	11479	Product change TP1	0	6993	APP_PRODUCTCHANGE_TP_1	Product change TP1	17		52715	Baseplate change TP 1	0		146446	13	2020-02-13 08:00:17	2020-02-13 08:00:17	2020-07-17 12:52:32	NO001	14	14	1	1	0F131FC6-7288-45D0-B174-F9971B3251C4.JPEG	2020-02-13 08:37:00	2020-02-13 08:37:00	2020-02-13 08:37:00	2020	2	13	1	1	643D8C03-9CC2-4CEB-90FE-038C3C5A8456.JPEG	2020-02-13 08:38:00	2020-02-13 08:38:00	2020-02-13 08:38:00	2020	2	13
16	CP288	86	Prod	1174	82	1004	25	NO001	NO001	World	11479	Product change TP1	0	6993	APP_PRODUCTCHANGE_TP_1	Product change TP1	17		52715	Baseplate change TP 1	0		146462	14	2020-02-14 08:00:12	2020-02-14 08:00:12	2020-07-17 12:52:32	NO001	15	15	1	1	D77AB771-33B3-471F-865B-B8BF529078EC.JPEG	2020-02-14 07:57:00	2020-02-14 07:57:00	2020-02-14 07:57:00	2020	2	14	1	1	120B40AC-1647-4FB3-BE56-551D0137C2C2.JPEG	2020-02-14 07:57:00	2020-02-14 07:57:00	2020-02-14 07:57:00	2020	2	14
16	CP288	86	Prod	1174	82	1004	25	NO001	NO001	World	11479	Product change TP1	0	6993	APP_PRODUCTCHANGE_TP_1	Product change TP1	17		52715	Baseplate change TP 1	0		146509	15	2020-02-15 11:00:08	2020-02-15 11:00:08	2020-07-17 12:52:32	NO001	16	16	1	1	081E8B81-D2E3-41FB-89AB-0BF2CDC4131E.JPEG	2020-02-15 11:38:00	2020-02-15 11:38:00	2020-02-15 11:38:00	2020	2	15	1	1	873E4230-334D-4607-8837-83D652FDBBF6.JPEG	2020-02-15 11:38:00	2020-02-15 11:38:00	2020-02-15 11:38:00	2020	2	15
16	CP288	86	Prod	1174	82	1004	25	NO001	NO001	World	11479	Product change TP1	0	6993	APP_PRODUCTCHANGE_TP_1	Product change TP1	17		52715	Baseplate change TP 1	0		146524	16	2020-02-15 21:00:13	2020-02-15 21:00:13	2020-07-17 12:52:32	NO001	17	17	1	1	8971C58A-62BA-499B-93C6-EDF93A5431AE.JPEG	2020-02-15 21:44:00	2020-02-15 21:44:00	2020-02-15 21:44:00	2020	2	15	1	1	24BD0B4A-EF17-46E6-8B49-70C12C612C82.JPEG	2020-02-15 21:45:00	2020-02-15 21:45:00	2020-02-15 21:45:00	2020	2	15
16	CP288	86	Prod	1174	82	1004	25	NO001	NO001	World	11479	Product change TP1	0	6993	APP_PRODUCTCHANGE_TP_1	Product change TP1	17		52715	Baseplate change TP 1	0		146550	17	2020-02-16 15:00:09	2020-02-16 15:00:09	2020-07-17 12:52:32	NO001	18	18	1	1	1885C147-E41B-4899-B5CE-AF1F7E7DD45F.JPEG	2020-02-16 15:35:00	2020-02-16 15:35:00	2020-02-16 15:35:00	2020	2	16	1	1	CBD280CC-67BA-4B8B-ACDD-9E1F6BED7160.JPEG	2020-02-16 15:36:00	2020-02-16 15:36:00	2020-02-16 15:36:00	2020	2	16
16	CP288	86	Prod	1174	82	1004	25	NO001	NO001	World	11479	Product change TP1	0	6993	APP_PRODUCTCHANGE_TP_1	Product change TP1	17		52715	Baseplate change TP 1	0		149450	18	2020-02-18 19:00:06	2020-02-18 19:00:06	2020-07-17 12:52:32	NO001	19	19	1	1	40E04F9C-1C7B-4BC8-965A-33A455CACBFB.JPEG	2020-02-17 02:39:00	2020-02-17 02:39:00	2020-02-17 02:39:00	2020	2	17	1	1	B660EA0D-CDEA-4E78-BA19-64233187985E.JPEG	2020-02-17 02:39:00	2020-02-17 02:39:00	2020-02-17 02:39:00	2020	2	17
16	CP288	86	Prod	1174	82	1004	25	NO001	NO001	World	11479	Product change TP1	0	6993	APP_PRODUCTCHANGE_TP_1	Product change TP1	17		52715	Baseplate change TP 1	0		149453	19	2020-02-18 19:00:10	2020-02-18 19:00:10	2020-07-17 12:52:32	NO001	20	20	1	1	D968462E-0AC8-4FA6-A829-16778A19BF96.JPEG	2020-02-18 19:32:00	2020-02-18 19:32:00	2020-02-18 19:32:00	2020	2	18	1	1	9E3880DC-D633-41FB-9752-3F1A2CECB139.JPEG	2020-02-18 19:32:00	2020-02-18 19:32:00	2020-02-18 19:32:00	2020	2	18
16	CP288	86	Prod	1174	82	1004	25	NO001	NO001	World	11479	Product change TP1	0	6993	APP_PRODUCTCHANGE_TP_1	Product change TP1	17		52715	Baseplate change TP 1	0		150460	20	2020-02-19 17:00:09	2020-02-19 17:00:09	2020-07-17 12:52:32	NO001	21	21	1	1	C854DA07-58A8-405B-A928-CA4DCBA3E3A3.JPEG	2020-02-19 16:38:00	2020-02-19 16:38:00	2020-02-19 16:38:00	2020	2	19	1	1	47509287-DF44-4B80-9E24-645CE9DC0F4E.JPEG	2020-02-19 16:39:00	2020-02-19 16:39:00	2020-02-19 16:39:00	2020	2	19
16	CP288	86	Prod	1174	82	1004	25	NO001	NO001	World	11479	Product change TP1	0	6993	APP_PRODUCTCHANGE_TP_1	Product change TP1	17		52715	Baseplate change TP 1	0		152385	21	2020-02-20 12:00:18	2020-02-20 12:00:18	2020-07-17 12:52:32	NO001	22	22	1	1	701461C9-4880-4D7D-B9AE-5FD7D5F63C48.JPEG	2020-02-20 12:43:00	2020-02-20 12:43:00	2020-02-20 12:43:00	2020	2	20	1	1	0495CB30-4F98-49B5-A64A-046C62622840.JPEG	2020-02-20 12:44:00	2020-02-20 12:44:00	2020-02-20 12:44:00	2020	2	20
16	CP288	86	Prod	1174	82	1004	25	NO001	NO001	World	11479	Product change TP1	0	6993	APP_PRODUCTCHANGE_TP_1	Product change TP1	17		52715	Baseplate change TP 1	0		152745	22	2020-02-21 23:00:09	2020-02-21 23:00:09	2020-07-17 12:52:32	NO001	23	23	1	1	AA4F7A88-5052-4DE4-AF18-48786085805D.JPEG	2020-02-21 23:06:00	2020-02-21 23:06:00	2020-02-21 23:06:00	2020	2	21	1	1	21D13DAD-A4DB-4891-80DD-3B3DBB3B0B81.JPEG	2020-02-21 23:06:00	2020-02-21 23:06:00	2020-02-21 23:06:00	2020	2	21
16	CP288	86	Prod	1174	82	1004	25	NO001	NO001	World	11479	Product change TP1	0	6993	APP_PRODUCTCHANGE_TP_1	Product change TP1	17		52715	Baseplate change TP 1	0		153168	23	2020-02-24 18:00:11	2020-02-24 18:00:11	2020-07-17 12:52:32	NO001	27	27	1	1	2EDA33DA-040C-4FF1-B96E-5469893DC901.JPEG	2020-02-24 18:22:00	2020-02-24 18:22:00	2020-02-24 18:22:00	2020	2	24	1	1	F760CED3-AE04-447E-8FB0-64D70F69AADD.JPEG	2020-02-24 18:22:00	2020-02-24 18:22:00	2020-02-24 18:22:00	2020	2	24
16	CP288	86	Prod	1174	82	1004	25	NO001	NO001	World	11479	Product change TP1	0	6993	APP_PRODUCTCHANGE_TP_1	Product change TP1	17		52715	Baseplate change TP 1	0		153543	24	2020-02-25 09:00:19	2020-02-25 09:00:19	2020-07-17 12:52:32	NO001	28	28	1	1	070EBD65-682A-49B7-88BD-75A442031FEA.JPEG	2020-02-25 09:03:00	2020-02-25 09:03:00	2020-02-25 09:03:00	2020	2	25	1	1	21CC67B8-B678-4ADB-9BC3-37155A34D85B.JPEG	2020-02-25 09:03:00	2020-02-25 09:03:00	2020-02-25 09:03:00	2020	2	25
16	CP288	86	Prod	1174	82	1004	25	NO001	NO001	World	11479	Product change TP1	0	6993	APP_PRODUCTCHANGE_TP_1	Product change TP1	17		52715	Baseplate change TP 1	0		154311	25	2020-02-26 07:00:13	2020-02-26 07:00:13	2020-07-17 12:52:32	NO001	29	29	1	1	104530E3-D0A1-4372-BCE2-09220384D022.JPEG	2020-02-26 07:38:00	2020-02-26 07:38:00	2020-02-26 07:38:00	2020	2	26	1	1	05A3AB8E-2AB5-4B7A-80EF-E191C8F8FD25.JPEG	2020-02-26 07:38:00	2020-02-26 07:38:00	2020-02-26 07:38:00	2020	2	26
16	CP288	86	Prod	1174	82	1004	25	NO001	NO001	World	11479	Product change TP1	0	6993	APP_PRODUCTCHANGE_TP_1	Product change TP1	17		52715	Baseplate change TP 1	0		154516	26	2020-02-26 17:00:06	2020-02-26 17:00:06	2020-07-17 12:52:32	NO001	30	30	1	1	240505B1-728A-407A-A299-F055D1C483E0.JPEG	2020-02-26 17:11:00	2020-02-26 17:11:00	2020-02-26 17:11:00	2020	2	26	1	1	246C2115-5D45-4176-89E1-B52724894247.JPEG	2020-02-26 17:11:00	2020-02-26 17:11:00	2020-02-26 17:11:00	2020	2	26
16	CP288	86	Prod	1174	82	1004	25	NO001	NO001	World	11479	Product change TP1	0	6993	APP_PRODUCTCHANGE_TP_1	Product change TP1	17		52715	Baseplate change TP 1	0		154618	27	2020-02-27 09:00:08	2020-02-27 09:00:08	2020-07-17 12:52:32	NO001	31	31	1	1	8E561B01-1E6E-43AF-8ABD-DF3369F106B2.JPEG	2020-02-27 08:23:00	2020-02-27 08:23:00	2020-02-27 08:23:00	2020	2	27	1	1	F729AEFF-2182-4E6F-A9A6-37AB2BAE8279.JPEG	2020-02-27 08:23:00	2020-02-27 08:23:00	2020-02-27 08:23:00	2020	2	27
16	CP288	86	Prod	1174	82	1004	25	NO001	NO001	World	11479	Product change TP1	0	6993	APP_PRODUCTCHANGE_TP_1	Product change TP1	17		52715	Baseplate change TP 1	0		154641	28	2020-02-27 17:00:07	2020-02-27 17:00:07	2020-07-17 12:52:32	NO001	32	32	1	1	C564AA49-7014-49C6-987C-BF94E670B44D.JPEG	2020-02-27 17:52:00	2020-02-27 17:52:00	2020-02-27 17:52:00	2020	2	27	1	1	C1E6A5DE-7ED8-4F25-9FA2-0730D9E93288.JPEG	2020-02-27 17:52:00	2020-02-27 17:52:00	2020-02-27 17:52:00	2020	2	27
16	CP288	86	Prod	1174	82	1004	25	NO001	NO001	World	11479	Product change TP1	0	6993	APP_PRODUCTCHANGE_TP_1	Product change TP1	17		52715	Baseplate change TP 1	0		154695	29	2020-02-28 08:01:03	2020-02-28 08:01:03	2020-07-17 12:52:32	NO001	33	33	1	1	05EC38E4-617A-4628-87E7-CA4C2A6DE75A.JPEG	2020-02-28 07:59:00	2020-02-28 07:59:00	2020-02-28 07:59:00	2020	2	28	1	1	4891DD5F-1D57-409B-9883-A338A23F6EB9.JPEG	2020-02-28 08:00:00	2020-02-28 08:00:00	2020-02-28 08:00:00	2020	2	28
16	CP288	86	Prod	1174	82	1004	25	NO001	NO001	World	11479	Product change TP1	0	6993	APP_PRODUCTCHANGE_TP_1	Product change TP1	17		52715	Baseplate change TP 1	0		154781	30	2020-02-29 00:00:16	2020-02-29 00:00:16	2020-07-17 12:52:32	NO001	34	34	1	1	CD712213-913F-4C61-AD04-FA7B2D3DD8BC.JPEG	2020-02-29 00:22:00	2020-02-29 00:22:00	2020-02-29 00:22:00	2020	2	29	1	1	AFF8C6EE-F3B5-4C20-A1B5-C981C1D7E956.JPEG	2020-02-29 00:23:00	2020-02-29 00:23:00	2020-02-29 00:23:00	2020	2	29
16	CP288	86	Prod	1174	82	1004	25	NO001	NO001	World	11479	Product change TP1	0	6993	APP_PRODUCTCHANGE_TP_1	Product change TP1	17		52715	Baseplate change TP 1	0		154825	31	2020-02-29 14:01:02	2020-02-29 14:01:02	2020-07-17 12:52:32	NO001	35	35	1	1	46050725-37C1-400A-8491-85A34A3C68DB.JPEG	2020-02-29 14:12:00	2020-02-29 14:12:00	2020-02-29 14:12:00	2020	2	29	1	1	57302FB7-8C0D-4E74-B32B-0C9673370D1D.JPEG	2020-02-29 14:12:00	2020-02-29 14:12:00	2020-02-29 14:12:00	2020	2	29
16	CP288	86	Prod	1174	82	1004	25	NO001	NO001	World	11479	Product change TP1	0	6993	APP_PRODUCTCHANGE_TP_1	Product change TP1	17		52715	Baseplate change TP 1	0		155002	32	2020-03-02 18:00:09	2020-03-02 18:00:09	2020-07-17 12:52:32	NO001	36	36	1	1	2A4B7B4F-87AD-4903-B285-C5899F705E05.JPEG	2020-03-01 15:12:00	2020-03-01 15:12:00	2020-03-01 15:12:00	2020	3	1	1	1	04A83AC7-799A-471C-8B69-8DEEF378CC33.JPEG	2020-03-01 15:13:00	2020-03-01 15:13:00	2020-03-01 15:13:00	2020	3	1
16	CP288	86	Prod	1174	82	1004	25	NO001	NO001	World	11479	Product change TP1	0	6993	APP_PRODUCTCHANGE_TP_1	Product change TP1	17		52715	Baseplate change TP 1	0		155005	33	2020-03-02 18:00:19	2020-03-02 18:00:19	2020-07-17 12:52:32	NO001	37	37	1	1	549B384C-7619-44E3-ACD6-DE0BF2A82A78.JPEG	2020-03-02 07:42:00	2020-03-02 07:42:00	2020-03-02 07:42:00	2020	3	2	1	1	328B5A58-E196-4998-A9B5-769F054EB7E7.JPEG	2020-03-02 07:42:00	2020-03-02 07:42:00	2020-03-02 07:42:00	2020	3	2
16	CP288	86	Prod	1174	82	1004	25	NO001	NO001	World	11479	Product change TP1	0	6993	APP_PRODUCTCHANGE_TP_1	Product change TP1	17		52715	Baseplate change TP 1	0		156961	34	2020-03-03 18:00:07	2020-03-03 18:00:07	2020-07-17 12:52:32	NO001	38	38	1	1	946F319D-5974-4DFC-A3BA-FB8DA73B6525.JPEG	2020-03-03 09:14:00	2020-03-03 09:14:00	2020-03-03 09:14:00	2020	3	3	1	1	64C16099-CCC7-4FD3-BD98-B6E47E471C55.JPEG	2020-03-03 09:14:00	2020-03-03 09:14:00	2020-03-03 09:14:00	2020	3	3
16	CP288	86	Prod	1174	82	1004	25	NO001	NO001	World	11479	Product change TP1	0	6993	APP_PRODUCTCHANGE_TP_1	Product change TP1	17		52715	Baseplate change TP 1	0		156964	35	2020-03-03 18:00:11	2020-03-03 18:00:11	2020-07-17 12:52:32	NO001	39	39	1	1	5E69B893-AA07-4B92-9581-F45765AC3D9B.JPEG	2020-03-03 18:46:00	2020-03-03 18:46:00	2020-03-03 18:46:00	2020	3	3	1	1	CC324D7E-9DB0-42F7-B98D-F1057B3DF0BE.JPEG	2020-03-03 18:47:00	2020-03-03 18:47:00	2020-03-03 18:47:00	2020	3	3
16	CP288	86	Prod	1174	82	1004	25	NO001	NO001	World	11479	Product change TP1	0	6993	APP_PRODUCTCHANGE_TP_1	Product change TP1	17		52715	Baseplate change TP 1	0		157006	36	2020-03-04 08:00:10	2020-03-04 08:00:10	2020-07-17 12:52:32	NO001	40	40	1	1	6DD78EE4-9CA6-4429-9EA5-B7B51F90ED76.JPEG	2020-03-04 08:16:00	2020-03-04 08:16:00	2020-03-04 08:16:00	2020	3	4	1	1	23F64825-FFEC-4B33-BEF4-405712265C80.JPEG	2020-03-04 08:17:00	2020-03-04 08:17:00	2020-03-04 08:17:00	2020	3	4
16	CP288	86	Prod	1174	82	1004	25	NO001	NO001	World	11479	Product change TP1	0	6993	APP_PRODUCTCHANGE_TP_1	Product change TP1	17		52715	Baseplate change TP 1	0		157909	37	2020-03-06 06:00:08	2020-03-06 06:00:08	2020-07-17 12:52:32	NO001	42	42	1	1	0DD396BC-FD33-4640-BAB7-7CA1ED0AFB20.JPEG	2020-03-05 23:55:00	2020-03-05 23:55:00	2020-03-05 23:55:00	2020	3	5	1	1	09C961FC-20E0-402E-B458-D13A9F5216A3.JPEG	2020-03-05 23:55:00	2020-03-05 23:55:00	2020-03-05 23:55:00	2020	3	5
16	CP288	86	Prod	1174	82	1004	25	NO001	NO001	World	11479	Product change TP1	0	6993	APP_PRODUCTCHANGE_TP_1	Product change TP1	17		52715	Baseplate change TP 1	0		157975	38	2020-03-07 08:00:19	2020-03-07 08:00:19	2020-07-17 12:52:32	NO001	43	43	1	1	958BACA8-DEFA-4713-BF0B-CED8ED01AA1A.JPEG	2020-03-06 16:55:00	2020-03-06 16:55:00	2020-03-06 16:55:00	2020	3	6	1	1	735A4D1F-516A-4262-85F6-4A9B22742081.JPEG	2020-03-06 16:55:00	2020-03-06 16:55:00	2020-03-06 16:55:00	2020	3	6
16	CP288	86	Prod	1174	82	1004	25	NO001	NO001	World	11479	Product change TP1	0	6993	APP_PRODUCTCHANGE_TP_1	Product change TP1	17		52715	Baseplate change TP 1	0		157978	39	2020-03-07 08:00:31	2020-03-07 08:00:31	2020-07-17 12:52:32	NO001	44	44	1	1	D2E80F96-708B-40C6-B89B-F5C1E937766F.JPEG	2020-03-07 08:52:00	2020-03-07 08:52:00	2020-03-07 08:52:00	2020	3	7	1	1	8B81EE25-6B15-418D-BFA6-D5FD32BCAAB7.JPEG	2020-03-07 08:52:00	2020-03-07 08:52:00	2020-03-07 08:52:00	2020	3	7
16	CP288	86	Prod	1174	82	1004	25	NO001	NO001	World	11479	Product change TP1	0	6993	APP_PRODUCTCHANGE_TP_1	Product change TP1	17		52715	Baseplate change TP 1	0		158103	40	2020-03-08 21:00:07	2020-03-08 21:00:07	2020-07-17 12:52:32	NO001	46	46	1	1	AD61768B-87DB-40A3-9206-49936724F0CB.JPEG	2020-03-08 21:55:00	2020-03-08 21:55:00	2020-03-08 21:55:00	2020	3	8	1	1	BB4B03DA-7873-4E64-B426-86E6ED1809CF.JPEG	2020-03-08 21:55:00	2020-03-08 21:55:00	2020-03-08 21:55:00	2020	3	8
16	CP288	86	Prod	1174	82	1004	25	NO001	NO001	World	11479	Product change TP1	0	6993	APP_PRODUCTCHANGE_TP_1	Product change TP1	17		52715	Baseplate change TP 1	0		158144	41	2020-03-09 08:01:03	2020-03-09 08:01:03	2020-07-17 12:52:32	NO001	47	47	1	1	89EA8DBE-B72A-4678-9DF5-EBE7B3228792.JPEG	2020-03-09 08:44:00	2020-03-09 08:44:00	2020-03-09 08:44:00	2020	3	9	1	1	DC927E61-95A6-4835-B279-032053062991.JPEG	2020-03-09 08:44:00	2020-03-09 08:44:00	2020-03-09 08:44:00	2020	3	9
16	CP288	86	Prod	1174	82	1004	25	NO001	NO001	World	11479	Product change TP1	0	6993	APP_PRODUCTCHANGE_TP_1	Product change TP1	17		52715	Baseplate change TP 1	0		158316	42	2020-03-10 09:00:18	2020-03-10 09:00:18	2020-07-17 12:52:32	NO001	48	48	1	1	2BAAC71A-9DD7-4F4C-8763-EE1A3B86A3DF.JPEG	2020-03-10 09:18:00	2020-03-10 09:18:00	2020-03-10 09:18:00	2020	3	10	1	1	19D09866-783E-4E91-A134-F1EB224FA5FF.JPEG	2020-03-10 09:18:00	2020-03-10 09:18:00	2020-03-10 09:18:00	2020	3	10
16	CP288	86	Prod	1174	82	1004	25	NO001	NO001	World	11479	Product change TP1	0	6993	APP_PRODUCTCHANGE_TP_1	Product change TP1	17		52715	Baseplate change TP 1	0		158418	43	2020-03-11 10:00:23	2020-03-11 10:00:23	2020-07-17 12:52:32	NO001	49	49	1	1	726385EF-A40F-4EB8-9394-0488159B5CD0.JPEG	2020-03-11 10:30:00	2020-03-11 10:30:00	2020-03-11 10:30:00	2020	3	11	1	1	57D34512-61B2-4B51-8C8A-D1F37318D1FA.JPEG	2020-03-11 10:30:00	2020-03-11 10:30:00	2020-03-11 10:30:00	2020	3	11
16	CP288	86	Prod	1174	82	1004	25	NO001	NO001	World	11479	Product change TP1	0	6993	APP_PRODUCTCHANGE_TP_1	Product change TP1	17		52715	Baseplate change TP 1	0		158480	44	2020-03-12 07:00:21	2020-03-12 07:00:21	2020-07-17 12:52:32	NO001	50	50	1	1	C4C70A5F-59D0-45B7-9522-3C2F7B75095B.JPEG	2020-03-12 07:31:00	2020-03-12 07:31:00	2020-03-12 07:31:00	2020	3	12	1	1	29EA641C-EFBC-4DD2-AE09-7F4A412EEDA2.JPEG	2020-03-12 07:31:00	2020-03-12 07:31:00	2020-03-12 07:31:00	2020	3	12
16	CP288	86	Prod	1174	82	1004	25	NO001	NO001	World	11479	Product change TP1	0	6993	APP_PRODUCTCHANGE_TP_1	Product change TP1	17		52715	Baseplate change TP 1	0		158697	45	2020-03-13 16:00:05	2020-03-13 16:00:05	2020-07-17 12:52:32	NO001	51	51	1	1	3D21671B-13E9-46A4-84FD-6B3FE2D45407.JPEG	2020-03-12 23:40:00	2020-03-12 23:40:00	2020-03-12 23:40:00	2020	3	12	1	1	34010C22-44CD-4E0E-809E-E2C3E2475257.JPEG	2020-03-12 23:41:00	2020-03-12 23:41:00	2020-03-12 23:41:00	2020	3	12
16	CP288	86	Prod	1174	82	1004	25	NO001	NO001	World	11479	Product change TP1	0	6993	APP_PRODUCTCHANGE_TP_1	Product change TP1	17		52715	Baseplate change TP 1	0		158700	46	2020-03-13 16:00:09	2020-03-13 16:00:09	2020-07-17 12:52:32	NO001	52	52	1	1	71BB9A2F-E482-4149-927F-DA2E87848CD6.JPEG	2020-03-13 16:01:00	2020-03-13 16:01:00	2020-03-13 16:01:00	2020	3	13	1	1	1F915BD7-C90F-4D30-BC64-3856DBD9A48E.JPEG	2020-03-13 16:02:00	2020-03-13 16:02:00	2020-03-13 16:02:00	2020	3	13
16	CP288	86	Prod	1174	82	1004	25	NO001	NO001	World	11479	Product change TP1	0	6993	APP_PRODUCTCHANGE_TP_1	Product change TP1	17		52715	Baseplate change TP 1	0		158906	47	2020-03-14 11:00:24	2020-03-14 11:00:24	2020-07-17 12:52:32	NO001	54	54	1	1	6E73A994-42C2-4D77-BBE7-4BC3BDC83CFB.JPEG	2020-03-14 11:49:00	2020-03-14 11:49:00	2020-03-14 11:49:00	2020	3	14	1	1	DFB5F996-7B06-4192-9CF1-F4E05016BE88.JPEG	2020-03-14 11:49:00	2020-03-14 11:49:00	2020-03-14 11:49:00	2020	3	14
16	CP288	86	Prod	1174	82	1004	25	NO001	NO001	World	11479	Product change TP1	0	6993	APP_PRODUCTCHANGE_TP_1	Product change TP1	17		52715	Baseplate change TP 1	0		158987	48	2020-03-15 15:00:05	2020-03-15 15:00:05	2020-07-17 12:52:32	NO001	55	55	1	1	357A93FD-9FC5-4999-B60F-0EFBDF9B1776.JPEG	2020-03-15 15:13:00	2020-03-15 15:13:00	2020-03-15 15:13:00	2020	3	15	1	1	B7815836-3C8F-44CE-B544-3B790E69A277.JPEG	2020-03-15 15:13:00	2020-03-15 15:13:00	2020-03-15 15:13:00	2020	3	15
16	CP288	86	Prod	1174	82	1004	25	NO001	NO001	World	11480	Product change TP2	0	6994	APP_PRODUCTCHANGE_TP_2	Product change TP2	19		52716	Baseplate change TP 1	0		161215	2	2020-03-17 14:00:32	2020-03-17 14:00:32	2020-07-17 12:52:32	NO001	58	58	1	1	9F829D92-DDE8-4612-8ECC-8B73B37891E9.JPEG	2020-03-17 14:36:00	2020-03-17 14:36:00	2020-03-17 14:36:00	2020	3	17	1	1	22F636D0-07D0-4945-8905-0F53B1DE7A5D.JPEG	2020-03-17 14:36:00	2020-03-17 14:36:00	2020-03-17 14:36:00	2020	3	17
16	CP288	86	Prod	1174	82	1004	25	NO001	NO001	World	11480	Product change TP2	0	6994	APP_PRODUCTCHANGE_TP_2	Product change TP2	19		52716	Baseplate change TP 1	0		161715	3	2020-03-18 19:00:16	2020-03-18 19:00:16	2020-07-17 12:52:32	NO001	59	59	1	1	B3CEA487-E209-4707-957A-1E1DC91FBEC7.JPEG	2020-03-18 18:32:00	2020-03-18 18:32:00	2020-03-18 18:32:00	2020	3	18	1	1	CB6CFA30-CCB1-4BA8-B64F-FDCD31856430.JPEG	2020-03-18 18:32:00	2020-03-18 18:32:00	2020-03-18 18:32:00	2020	3	18
16	CP288	86	Prod	1174	82	1004	25	NO001	NO001	World	11480	Product change TP2	0	6994	APP_PRODUCTCHANGE_TP_2	Product change TP2	19		52716	Baseplate change TP 1	0		162246	4	2020-03-20 01:00:11	2020-03-20 01:00:11	2020-07-17 12:52:32	NO001	60	60	1	1	81366101-E53C-418A-A267-C3ADCF7A7DD5.JPEG	2020-03-20 01:20:00	2020-03-20 01:20:00	2020-03-20 01:20:00	2020	3	20	1	1	A8CEAFD6-2863-4459-A76D-5CB795658808.JPEG	2020-03-20 01:21:00	2020-03-20 01:21:00	2020-03-20 01:21:00	2020	3	20
16	CP288	86	Prod	1174	82	1004	25	NO001	NO001	World	11480	Product change TP2	0	6994	APP_PRODUCTCHANGE_TP_2	Product change TP2	19		52716	Baseplate change TP 1	0		162567	5	2020-03-20 12:00:36	2020-03-20 12:00:36	2020-07-17 12:52:32	NO001	61	61	1	1	2308C40E-2C13-43E0-A748-AB993254549A.JPEG	2020-03-20 12:24:00	2020-03-20 12:24:00	2020-03-20 12:24:00	2020	3	20	1	1	154BA8EC-88E4-4F11-A775-8125C2B769B9.JPEG	2020-03-20 12:25:00	2020-03-20 12:25:00	2020-03-20 12:25:00	2020	3	20
16	CP288	86	Prod	1174	82	1004	25	NO001	NO001	World	11480	Product change TP2	0	6994	APP_PRODUCTCHANGE_TP_2	Product change TP2	19		52716	Baseplate change TP 1	0		162700	6	2020-03-21 07:00:35	2020-03-21 07:00:35	2020-07-17 12:52:32	NO001	62	62	1	1	64A4384D-F419-497D-9930-B8E1EC81A8AE.JPEG	2020-03-21 06:50:00	2020-03-21 06:50:00	2020-03-21 06:50:00	2020	3	21	1	1	DF616377-ADEF-4C12-A4A0-13ECE88BEA15.JPEG	2020-03-21 06:50:00	2020-03-21 06:50:00	2020-03-21 06:50:00	2020	3	21
16	CP288	86	Prod	1174	82	1004	25	NO001	NO001	World	11480	Product change TP2	0	6994	APP_PRODUCTCHANGE_TP_2	Product change TP2	19		52716	Baseplate change TP 1	0		162735	7	2020-03-21 19:00:21	2020-03-21 19:00:21	2020-07-17 12:52:32	NO001	63	63	1	1	71BBCAC3-8531-4089-958F-EFFB4F7295C3.JPEG	2020-03-21 18:22:00	2020-03-21 18:22:00	2020-03-21 18:22:00	2020	3	21	1	1	623097E4-CEC1-4746-9392-FE0CE5D006B6.JPEG	2020-03-21 18:22:00	2020-03-21 18:22:00	2020-03-21 18:22:00	2020	3	21
16	CP288	86	Prod	1174	82	1004	25	NO001	NO001	World	11480	Product change TP2	0	6994	APP_PRODUCTCHANGE_TP_2	Product change TP2	19		52716	Baseplate change TP 1	0		162777	8	2020-03-22 13:00:18	2020-03-22 13:00:18	2020-07-17 12:52:32	NO001	64	64	1	1	55BB5BF2-4D42-4DB5-B138-441157106C53.JPEG	2020-03-22 13:47:00	2020-03-22 13:47:00	2020-03-22 13:47:00	2020	3	22	1	1	9F79266F-9AAC-405A-94A4-12ED4B9344DF.JPEG	2020-03-22 13:47:00	2020-03-22 13:47:00	2020-03-22 13:47:00	2020	3	22
16	CP288	86	Prod	1174	82	1004	25	NO001	NO001	World	11480	Product change TP2	0	6994	APP_PRODUCTCHANGE_TP_2	Product change TP2	19		52716	Baseplate change TP 1	0		163380	9	2020-03-23 18:00:15	2020-03-23 18:00:15	2020-07-17 12:52:32	NO001	65	65	1	1	4DC1322E-C652-4E65-9272-B5890B3F723C.JPEG	2020-03-23 18:18:00	2020-03-23 18:18:00	2020-03-23 18:18:00	2020	3	23	1	1	ACAAF36B-932F-4FDD-A76F-0DC517DDF51B.JPEG	2020-03-23 18:18:00	2020-03-23 18:18:00	2020-03-23 18:18:00	2020	3	23
16	CP288	86	Prod	1174	82	1004	25	NO001	NO001	World	11480	Product change TP2	0	6994	APP_PRODUCTCHANGE_TP_2	Product change TP2	19		52716	Baseplate change TP 1	0		163580	10	2020-03-25 01:00:06	2020-03-25 01:00:06	2020-07-17 12:52:32	NO001	66	66	1	1	A5CC0DE9-6EE7-4DEF-A237-B7922C58F7E2.JPEG	2020-03-25 01:16:00	2020-03-25 01:16:00	2020-03-25 01:16:00	2020	3	25	1	1	3B6A4974-9613-493B-82CC-8E5D94C55C2C.JPEG	2020-03-25 01:16:00	2020-03-25 01:16:00	2020-03-25 01:16:00	2020	3	25
16	CP288	86	Prod	1174	82	1004	25	NO001	NO001	World	11480	Product change TP2	0	6994	APP_PRODUCTCHANGE_TP_2	Product change TP2	19		52716	Baseplate change TP 1	0		163883	11	2020-03-26 10:00:08	2020-03-26 10:00:08	2020-07-17 12:52:32	NO001	68	68	1	1	E5398E5D-7639-458B-BFAC-8A0A6307C94C.JPEG	2020-03-26 10:07:00	2020-03-26 10:07:00	2020-03-26 10:07:00	2020	3	26	1	1	8BEFE449-083A-410F-8EDE-44A66E2C9176.JPEG	2020-03-26 10:08:00	2020-03-26 10:08:00	2020-03-26 10:08:00	2020	3	26
16	CP288	86	Prod	1174	82	1004	25	NO001	NO001	World	11480	Product change TP2	0	6994	APP_PRODUCTCHANGE_TP_2	Product change TP2	19		52716	Baseplate change TP 1	0		164520	12	2020-03-27 10:00:16	2020-03-27 10:00:16	2020-07-17 12:52:32	NO001	69	69	1	1	60B54E32-F005-4DAE-833D-645B18456D04.JPEG	2020-03-27 10:18:00	2020-03-27 10:18:00	2020-03-27 10:18:00	2020	3	27	1	1	E5378437-8B1A-4C01-8CEA-75A42A161DCE.JPEG	2020-03-27 10:18:00	2020-03-27 10:18:00	2020-03-27 10:18:00	2020	3	27
16	CP288	86	Prod	1174	82	1004	25	NO001	NO001	World	11480	Product change TP2	0	6994	APP_PRODUCTCHANGE_TP_2	Product change TP2	19		52716	Baseplate change TP 1	0		164582	13	2020-03-28 14:00:08	2020-03-28 14:00:08	2020-07-17 12:52:32	NO001	70	70	1	1	76EE66AC-0488-416D-9FF1-B5AE7F7FD0EC.JPEG	2020-03-28 14:10:00	2020-03-28 14:10:00	2020-03-28 14:10:00	2020	3	28	1	1	5E76AA19-E10E-40A4-9EE2-2FCA8816DD06.JPEG	2020-03-28 14:11:00	2020-03-28 14:11:00	2020-03-28 14:11:00	2020	3	28
16	CP288	86	Prod	1174	82	1004	25	NO001	NO001	World	11480	Product change TP2	0	6994	APP_PRODUCTCHANGE_TP_2	Product change TP2	19		52716	Baseplate change TP 1	0		164770	14	2020-03-29 22:00:06	2020-03-29 22:00:06	2020-07-17 12:52:32	NO001	71	71	1	1	FB1BCCBB-3776-49F1-B2E7-C05252FC00E5.JPEG	2020-03-29 23:27:00	2020-03-29 23:27:00	2020-03-29 23:27:00	2020	3	29	1	1	EDB0891B-25C6-4B72-AB76-E5AC9AD67753.JPEG	2020-03-29 23:27:00	2020-03-29 23:27:00	2020-03-29 23:27:00	2020	3	29
16	CP288	86	Prod	1174	82	1004	25	NO001	NO001	World	11480	Product change TP2	0	6994	APP_PRODUCTCHANGE_TP_2	Product change TP2	19		52716	Baseplate change TP 1	0		165226	15	2020-03-31 14:00:11	2020-03-31 14:00:11	2020-07-17 12:52:32	NO001	72	72	1	1	57D99E21-08A6-4F50-99B3-87DDFD39D5E1.JPEG	2020-03-31 15:07:00	2020-03-31 15:07:00	2020-03-31 15:07:00	2020	3	31	1	1	FBC32D4F-9020-445B-8C8C-2C415ED32D6A.JPEG	2020-03-31 15:07:00	2020-03-31 15:07:00	2020-03-31 15:07:00	2020	3	31
16	CP288	86	Prod	1174	82	1004	25	NO001	NO001	World	11480	Product change TP2	0	6994	APP_PRODUCTCHANGE_TP_2	Product change TP2	19		52716	Baseplate change TP 1	0		168308	16	2020-04-01 11:00:06	2020-04-01 11:00:06	2020-07-17 12:52:32	NO001	73	73	1	1	E9D10512-7A9D-45F7-A2E6-DC43BFEB7AC9.JPEG	2020-04-01 12:16:00	2020-04-01 12:16:00	2020-04-01 12:16:00	2020	4	1	1	1	0074C14E-CD4F-4A25-A367-FF3657AB74BB.JPEG	2020-04-01 12:16:00	2020-04-01 12:16:00	2020-04-01 12:16:00	2020	4	1
16	CP288	86	Prod	1174	82	1004	25	NO001	NO001	World	11480	Product change TP2	0	6994	APP_PRODUCTCHANGE_TP_2	Product change TP2	19		52716	Baseplate change TP 1	0		168345	17	2020-04-01 17:00:08	2020-04-01 17:00:08	2020-07-17 12:52:32	NO001	74	74	1	1	F8034777-A033-4822-8EE8-5DB44C51D199.JPEG	2020-04-01 18:50:00	2020-04-01 18:50:00	2020-04-01 18:50:00	2020	4	1	1	1	67E03C2E-BEA2-47AC-957C-842A158BDC2E.JPEG	2020-04-01 18:50:00	2020-04-01 18:50:00	2020-04-01 18:50:00	2020	4	1
16	CP288	86	Prod	1174	82	1004	25	NO001	NO001	World	11480	Product change TP2	0	6994	APP_PRODUCTCHANGE_TP_2	Product change TP2	19		52716	Baseplate change TP 1	0		168453	18	2020-04-02 17:00:08	2020-04-02 17:00:08	2020-07-17 12:52:32	NO001	75	75	1	1	6AAF2A30-67F5-4FAA-A33A-24DCB8BD7EFA.JPEG	2020-04-02 18:06:00	2020-04-02 18:06:00	2020-04-02 18:06:00	2020	4	2	1	1	62ED4BFE-25C5-46A9-A028-E6B365B20BBB.JPEG	2020-04-02 18:06:00	2020-04-02 18:06:00	2020-04-02 18:06:00	2020	4	2
16	CP288	86	Prod	1174	82	1004	25	NO001	NO001	World	11480	Product change TP2	0	6994	APP_PRODUCTCHANGE_TP_2	Product change TP2	19		52716	Baseplate change TP 1	0		168578	19	2020-04-03 09:00:31	2020-04-03 09:00:31	2020-07-17 12:52:32	NO001	76	76	1	1	058D5C8E-1112-4542-8282-2514A0AC4A91.JPEG	2020-04-03 10:24:00	2020-04-03 10:24:00	2020-04-03 10:24:00	2020	4	3	1	1	786F45FA-8B96-4015-959A-B2B77270A6C5.JPEG	2020-04-03 10:24:00	2020-04-03 10:24:00	2020-04-03 10:24:00	2020	4	3
16	CP288	86	Prod	1174	82	1004	25	NO001	NO001	World	11480	Product change TP2	0	6994	APP_PRODUCTCHANGE_TP_2	Product change TP2	19		52716	Baseplate change TP 1	0		168669	20	2020-04-04 15:00:15	2020-04-04 15:00:15	2020-07-17 12:52:32	NO001	77	77	1	1	DEEA7C58-E201-4ACB-B2A2-A31E699E7FB2.JPEG	2020-04-04 16:22:00	2020-04-04 16:22:00	2020-04-04 16:22:00	2020	4	4	1	1	649486D5-0042-444C-A56F-05BE9057D7D4.JPEG	2020-04-04 16:22:00	2020-04-04 16:22:00	2020-04-04 16:22:00	2020	4	4
16	CP288	86	Prod	1174	82	1004	25	NO001	NO001	World	11480	Product change TP2	0	6994	APP_PRODUCTCHANGE_TP_2	Product change TP2	19		52716	Baseplate change TP 1	0		168856	21	2020-04-06 06:00:12	2020-04-06 06:00:12	2020-07-17 12:52:32	NO001	78	78	1	1	28226DC6-6B92-49AD-B0A6-5B9D153907AA.JPEG	2020-04-06 01:08:00	2020-04-06 01:08:00	2020-04-06 01:08:00	2020	4	6	1	1	8F13EC80-3C20-4432-B78D-947E36464F16.JPEG	2020-04-06 01:09:00	2020-04-06 01:09:00	2020-04-06 01:09:00	2020	4	6
16	CP288	86	Prod	1174	82	1004	25	NO001	NO001	World	11480	Product change TP2	0	6994	APP_PRODUCTCHANGE_TP_2	Product change TP2	19		52716	Baseplate change TP 1	0		168873	22	2020-04-06 11:00:08	2020-04-06 11:00:08	2020-07-17 12:52:32	NO001	79	79	1	1	5F34E16A-5A1B-4CCB-BBFE-9F603410D0D6.JPEG	2020-04-06 12:25:00	2020-04-06 12:25:00	2020-04-06 12:25:00	2020	4	6	1	1	FA8C03BD-3745-4AED-8D6E-750CBD7B0F3E.JPEG	2020-04-06 12:26:00	2020-04-06 12:26:00	2020-04-06 12:26:00	2020	4	6
16	CP288	86	Prod	1174	82	1004	25	NO001	NO001	World	11480	Product change TP2	0	6994	APP_PRODUCTCHANGE_TP_2	Product change TP2	19		52716	Baseplate change TP 1	0		169039	23	2020-04-07 12:00:05	2020-04-07 12:00:05	2020-07-17 12:52:32	NO001	80	80	1	1	EFE3D0C5-4DC6-4D1C-A7AC-69B333EE3BF6.JPEG	2020-04-07 13:47:00	2020-04-07 13:47:00	2020-04-07 13:47:00	2020	4	7	1	1	10642AED-9078-4B69-9733-5A6F76C55F56.JPEG	2020-04-07 13:47:00	2020-04-07 13:47:00	2020-04-07 13:47:00	2020	4	7
16	CP288	86	Prod	1174	82	1004	25	NO001	NO001	World	11480	Product change TP2	0	6994	APP_PRODUCTCHANGE_TP_2	Product change TP2	19		52716	Baseplate change TP 1	0		169173	24	2020-04-08 00:00:17	2020-04-08 00:00:17	2020-07-17 12:52:32	NO001	81	81	1	1	16FCB927-47D9-4663-87AA-E811DD372487.JPEG	2020-04-08 01:38:00	2020-04-08 01:38:00	2020-04-08 01:38:00	2020	4	8	1	1	D5A3205B-85AF-493B-A1BD-CD23E52D5DEE.JPEG	2020-04-08 01:38:00	2020-04-08 01:38:00	2020-04-08 01:38:00	2020	4	8
16	CP288	86	Prod	1174	82	1004	25	NO001	NO001	World	11480	Product change TP2	0	6994	APP_PRODUCTCHANGE_TP_2	Product change TP2	19		52716	Baseplate change TP 1	0		169403	25	2020-04-10 12:00:04	2020-04-10 12:00:04	2020-07-17 12:52:32	NO001	83	83	1	1	84DCFE1C-975A-4563-BAAF-9F07ED3F0D55.JPEG	2020-04-09 16:17:00	2020-04-09 16:17:00	2020-04-09 16:17:00	2020	4	9	1	1	4A8C1294-FC9D-482B-8EA6-ADCEE9A79CCF.JPEG	2020-04-09 16:18:00	2020-04-09 16:18:00	2020-04-09 16:18:00	2020	4	9
16	CP288	86	Prod	1174	82	1004	25	NO001	NO001	World	11480	Product change TP2	0	6994	APP_PRODUCTCHANGE_TP_2	Product change TP2	19		52716	Baseplate change TP 1	0		169406	26	2020-04-10 12:00:09	2020-04-10 12:00:09	2020-07-17 12:52:32	NO001	84	84	1	1	074CB7A1-D0FD-4801-9470-695E3D45CBE5.JPEG	2020-04-10 13:19:00	2020-04-10 13:19:00	2020-04-10 13:19:00	2020	4	10	1	1	BE61DE24-302B-4258-BF29-DC74C6C1C398.JPEG	2020-04-10 13:19:00	2020-04-10 13:19:00	2020-04-10 13:19:00	2020	4	10
16	CP288	86	Prod	1174	82	1004	25	NO001	NO001	World	11480	Product change TP2	0	6994	APP_PRODUCTCHANGE_TP_2	Product change TP2	19		52716	Baseplate change TP 1	0		169451	27	2020-04-11 09:00:30	2020-04-11 09:00:30	2020-07-17 12:52:32	NO001	86	86	1	1	93A62E1D-7221-49DB-B00C-69DEC5D0A7FB.JPEG	2020-04-11 10:50:00	2020-04-11 10:50:00	2020-04-11 10:50:00	2020	4	11	1	1	016396C9-7FD1-441F-A128-9AE49D51A5D2.JPEG	2020-04-11 10:50:00	2020-04-11 10:50:00	2020-04-11 10:50:00	2020	4	11
16	CP288	86	Prod	1174	82	1004	25	NO001	NO001	World	11480	Product change TP2	0	6994	APP_PRODUCTCHANGE_TP_2	Product change TP2	19		52716	Baseplate change TP 1	0		169616	28	2020-04-13 12:00:14	2020-04-13 12:00:14	2020-07-17 12:52:32	NO001	88	88	1	1	D121D932-10A7-4E45-87D8-4F6C37877086.JPEG	2020-04-13 13:11:00	2020-04-13 13:11:00	2020-04-13 13:11:00	2020	4	13	1	1	148388BE-7AD7-4259-803E-B29201AAB307.JPEG	2020-04-13 13:11:00	2020-04-13 13:11:00	2020-04-13 13:11:00	2020	4	13
16	CP288	86	Prod	1174	82	1004	25	NO001	NO001	World	11480	Product change TP2	0	6994	APP_PRODUCTCHANGE_TP_2	Product change TP2	19		52716	Baseplate change TP 1	0		170041	29	2020-04-15 12:00:18	2020-04-15 12:00:18	2020-07-17 12:52:32	NO001	89	89	1	1	F8D7502D-F05A-4C32-9D1D-1C9062149FD0.JPEG	2020-04-15 00:41:00	2020-04-15 00:41:00	2020-04-15 00:41:00	2020	4	15	1	1	E80B82BF-8696-4D7E-A7DD-33C90A21165F.JPEG	2020-04-15 00:41:00	2020-04-15 00:41:00	2020-04-15 00:41:00	2020	4	15
16	CP288	86	Prod	1174	82	1004	25	NO001	NO001	World	11480	Product change TP2	0	6994	APP_PRODUCTCHANGE_TP_2	Product change TP2	19		52716	Baseplate change TP 1	0		170044	30	2020-04-15 12:00:20	2020-04-15 12:00:20	2020-07-17 12:52:32	NO001	90	90	1	1	16BA7247-05B7-4062-A1DB-FC759E7667E6.JPEG	2020-04-15 13:34:00	2020-04-15 13:34:00	2020-04-15 13:34:00	2020	4	15	1	1	263D83B3-7D66-4258-9E08-4CD054F93C00.JPEG	2020-04-15 13:34:00	2020-04-15 13:34:00	2020-04-15 13:34:00	2020	4	15
16	CP288	86	Prod	1174	82	1004	25	NO001	NO001	World	11480	Product change TP2	0	6994	APP_PRODUCTCHANGE_TP_2	Product change TP2	19		52716	Baseplate change TP 1	0		170444	31	2020-04-16 15:00:06	2020-04-16 15:00:06	2020-07-17 12:52:32	NO001	91	91	1	1	A132B38A-F277-4B87-B514-4286401C129F.JPEG	2020-04-16 16:23:00	2020-04-16 16:23:00	2020-04-16 16:23:00	2020	4	16	1	1	6007CD58-A419-4875-8AA6-47B6F134F262.JPEG	2020-04-16 16:24:00	2020-04-16 16:24:00	2020-04-16 16:24:00	2020	4	16
16	CP288	86	Prod	1174	82	1004	25	NO001	NO001	World	11480	Product change TP2	0	6994	APP_PRODUCTCHANGE_TP_2	Product change TP2	19		52716	Baseplate change TP 1	0		171144	32	2020-04-18 10:00:18	2020-04-18 10:00:18	2020-07-17 12:52:32	NO001	93	93	1	1	32FC9AE3-5EC2-42D4-898F-174E0AB83D7A.JPEG	2020-04-18 11:24:00	2020-04-18 11:24:00	2020-04-18 11:24:00	2020	4	18	1	1	6298D086-0892-4B06-84B0-90FC620C9E80.JPEG	2020-04-18 11:24:00	2020-04-18 11:24:00	2020-04-18 11:24:00	2020	4	18
16	CP288	86	Prod	1174	82	1004	25	NO001	NO001	World	11480	Product change TP2	0	6994	APP_PRODUCTCHANGE_TP_2	Product change TP2	19		52716	Baseplate change TP 1	0		171170	33	2020-04-18 23:00:05	2020-04-18 23:00:05	2020-07-17 12:52:32	NO001	94	94	1	1	A5EA8206-F6C5-4D36-A84F-3B893091200D.JPEG	2020-04-19 00:07:00	2020-04-19 00:07:00	2020-04-19 00:07:00	2020	4	19	1	1	A3011B71-ED23-47F3-B4F2-8DECF845BEDA.JPEG	2020-04-19 00:08:00	2020-04-19 00:08:00	2020-04-19 00:08:00	2020	4	19
16	CP288	86	Prod	1174	82	1004	25	NO001	NO001	World	11480	Product change TP2	0	6994	APP_PRODUCTCHANGE_TP_2	Product change TP2	19		52716	Baseplate change TP 1	0		171333	34	2020-04-20 13:00:07	2020-04-20 13:00:07	2020-07-17 12:52:32	NO001	95	95	1	1	325C5F06-EF96-4FDB-AD7E-7941E9BFAB87.JPEG	2020-04-20 14:03:00	2020-04-20 14:03:00	2020-04-20 14:03:00	2020	4	20	1	1	298A82E3-9FB8-4CCE-9E00-E8FABD6B632D.JPEG	2020-04-20 14:04:00	2020-04-20 14:04:00	2020-04-20 14:04:00	2020	4	20
16	CP288	86	Prod	1174	82	1004	25	NO001	NO001	World	11480	Product change TP2	0	6994	APP_PRODUCTCHANGE_TP_2	Product change TP2	19		52716	Baseplate change TP 1	0		171402	35	2020-04-21 09:00:07	2020-04-21 09:00:07	2020-07-17 12:52:32	NO001	96	96	1	1	3FFE8A17-8AD4-4726-AA5C-10956D1CF56F.JPEG	2020-04-21 10:35:00	2020-04-21 10:35:00	2020-04-21 10:35:00	2020	4	21	1	1	13AE6DB7-11E8-48C0-B583-0BB7EBDD1A14.JPEG	2020-04-21 10:36:00	2020-04-21 10:36:00	2020-04-21 10:36:00	2020	4	21
16	CP288	86	Prod	1174	82	1004	25	NO001	NO001	World	11480	Product change TP2	0	6994	APP_PRODUCTCHANGE_TP_2	Product change TP2	19		52716	Baseplate change TP 1	0		171790	36	2020-04-22 16:00:07	2020-04-22 16:00:07	2020-07-17 12:52:32	NO001	97	97	1	1	7D9C5F88-9B04-4EB2-9E65-3634C8AB707F.JPEG	2020-04-22 10:20:00	2020-04-22 10:20:00	2020-04-22 10:20:00	2020	4	22	1	1	4E2EF97E-ACD5-4CB9-8429-69726BD607C8.JPEG	2020-04-22 10:20:00	2020-04-22 10:20:00	2020-04-22 10:20:00	2020	4	22
16	CP288	86	Prod	1174	82	1004	25	NO001	NO001	World	11480	Product change TP2	0	6994	APP_PRODUCTCHANGE_TP_2	Product change TP2	19		52716	Baseplate change TP 1	0		171793	37	2020-04-22 16:00:15	2020-04-22 16:00:15	2020-07-17 12:52:32	NO001	98	98	1	1	04CA2892-F781-4FC4-B733-4B9EC6922EFE.JPEG	2020-04-22 17:24:00	2020-04-22 17:24:00	2020-04-22 17:24:00	2020	4	22	1	1	70B71667-5C95-47DF-926B-51E68916C866.JPEG	2020-04-22 17:24:00	2020-04-22 17:24:00	2020-04-22 17:24:00	2020	4	22
16	CP288	86	Prod	1174	82	1004	25	NO001	NO001	World	11480	Product change TP2	0	6994	APP_PRODUCTCHANGE_TP_2	Product change TP2	19		52716	Baseplate change TP 1	0		172256	38	2020-04-23 09:00:07	2020-04-23 09:00:07	2020-07-17 12:52:32	NO001	99	99	1	1	C176D770-A0BB-4F55-8146-C9D837CECD26.JPEG	2020-04-23 10:03:00	2020-04-23 10:03:00	2020-04-23 10:03:00	2020	4	23	1	1	29AFDC1C-6770-48B0-B1E5-379B391291DE.JPEG	2020-04-23 10:04:00	2020-04-23 10:04:00	2020-04-23 10:04:00	2020	4	23
16	CP288	86	Prod	1174	82	1004	25	NO001	NO001	World	11480	Product change TP2	0	6994	APP_PRODUCTCHANGE_TP_2	Product change TP2	19		52716	Baseplate change TP 1	0		172293	39	2020-04-23 17:00:19	2020-04-23 17:00:19	2020-07-17 12:52:32	NO001	100	100	1	1	1B9ADC66-3EB2-4C02-8756-715C2EC7AD84.JPEG	2020-04-23 18:44:00	2020-04-23 18:44:00	2020-04-23 18:44:00	2020	4	23	1	1	553ADC95-1EC9-4DBD-8B1A-E0C489C2BE5F.JPEG	2020-04-23 18:45:00	2020-04-23 18:45:00	2020-04-23 18:45:00	2020	4	23
16	CP288	86	Prod	1174	82	1004	25	NO001	NO001	World	11480	Product change TP2	0	6994	APP_PRODUCTCHANGE_TP_2	Product change TP2	19		52716	Baseplate change TP 1	0		172381	40	2020-04-24 21:00:14	2020-04-24 21:00:14	2020-07-17 12:52:32	NO001	101	101	1	1	F05DDF5E-648F-4C16-8032-D6C70976D7BA.JPEG	2020-04-24 22:47:00	2020-04-24 22:47:00	2020-04-24 22:47:00	2020	4	24	1	1	BE1EA672-C9F7-4D41-8ECC-BDB2B0C4CF01.JPEG	2020-04-24 22:48:00	2020-04-24 22:48:00	2020-04-24 22:48:00	2020	4	24
16	CP288	86	Prod	1174	82	1004	25	NO001	NO001	World	11480	Product change TP2	0	6994	APP_PRODUCTCHANGE_TP_2	Product change TP2	19		52716	Baseplate change TP 1	0		172474	41	2020-04-25 22:00:04	2020-04-25 22:00:04	2020-07-17 12:52:32	NO001	103	103	1	1	2D035AE3-4380-423A-958E-2A85AC2B2200.JPEG	2020-04-25 22:36:00	2020-04-25 22:36:00	2020-04-25 22:36:00	2020	4	25	1	1	1FA089A4-ABB6-4736-8919-D0AAB4964D5A.JPEG	2020-04-25 22:37:00	2020-04-25 22:37:00	2020-04-25 22:37:00	2020	4	25
16	CP288	86	Prod	1174	82	1004	25	NO001	NO001	World	11480	Product change TP2	0	6994	APP_PRODUCTCHANGE_TP_2	Product change TP2	19		52716	Baseplate change TP 1	0		172528	42	2020-04-26 12:00:05	2020-04-26 12:00:05	2020-07-17 12:52:32	NO001	104	104	1	1	432703D5-BEB4-4902-9D3C-3745DF239F9E.JPEG	2020-04-26 13:18:00	2020-04-26 13:18:00	2020-04-26 13:18:00	2020	4	26	1	1	A549A3C0-118B-4953-AE12-B54A0A8E3A2B.JPEG	2020-04-26 13:18:00	2020-04-26 13:18:00	2020-04-26 13:18:00	2020	4	26
16	CP288	86	Prod	1174	82	1004	25	NO001	NO001	World	11480	Product change TP2	0	6994	APP_PRODUCTCHANGE_TP_2	Product change TP2	19		52716	Baseplate change TP 1	0		172617	43	2020-04-27 13:00:14	2020-04-27 13:00:14	2020-07-17 12:52:32	NO001	105	105	1	1	560C09B2-D65C-4F88-8C4A-D019C8B7A1C3.JPEG	2020-04-27 10:20:00	2020-04-27 10:20:00	2020-04-27 10:20:00	2020	4	27	1	1	BD21FC60-8FD2-49F0-9FD4-788D99F797A6.JPEG	2020-04-27 10:21:00	2020-04-27 10:21:00	2020-04-27 10:21:00	2020	4	27
16	CP288	86	Prod	1175	82	1005	25	NO001	NO001	World	11510	Product change TP1	0	6993	APP_PRODUCTCHANGE_TP_1	Product change TP1	17		52775	Baseplate change TP 1	0		137951	1	2020-02-05 14:00:15	2020-02-05 14:00:15	2020-07-17 12:52:32	NO001	0	0	1	1	CFD23C6D-67BE-4058-B715-51C49B0C4E0B.JPEG	2020-02-05 14:46:00	2020-02-05 14:46:00	2020-02-05 14:46:00	2020	2	5	1	1	4BD38B5A-6352-4FCC-B4B4-A85D107DF16A.JPEG	2020-02-05 14:47:00	2020-02-05 14:47:00	2020-02-05 14:47:00	2020	2	5
16	CP288	86	Prod	1175	82	1005	25	NO001	NO001	World	11511	Product change TP2	0	6994	APP_PRODUCTCHANGE_TP_2	Product change TP2	19		52776	Baseplate change TP 1	0		137953	1	2020-03-21 06:00:09	2020-03-21 06:00:09	2020-07-17 12:52:32	NO001	39	39	1	1	D131B712-7FC4-4857-B5F5-DEE77524615B.JPEG	2020-03-17 08:06:00	2020-03-17 08:06:00	2020-03-17 08:06:00	2020	3	17	1	1	719E9DA9-1488-47DF-A332-80094AB57BEA.JPEG	2020-03-17 08:06:00	2020-03-17 08:06:00	2020-03-17 08:06:00	2020	3	17
16	CP288	86	Prod	1175	82	1005	25	NO001	NO001	World	11510	Product change TP1	0	6993	APP_PRODUCTCHANGE_TP_1	Product change TP1	17		52775	Baseplate change TP 1	0		145954	2	2020-02-06 16:00:13	2020-02-06 16:00:13	2020-07-17 12:52:32	NO001	1	1	1	1	1AD0A4B4-94C3-408A-8011-E09A1A4F9266.JPEG	2020-02-06 16:20:00	2020-02-06 16:20:00	2020-02-06 16:20:00	2020	2	6	1	1	D212780D-89B0-4ED9-9B6B-F30E2C2C65C1.JPEG	2020-02-06 16:20:00	2020-02-06 16:20:00	2020-02-06 16:20:00	2020	2	6
16	CP288	86	Prod	1175	82	1005	25	NO001	NO001	World	11510	Product change TP1	0	6993	APP_PRODUCTCHANGE_TP_1	Product change TP1	17		52775	Baseplate change TP 1	0		146003	3	2020-02-07 21:00:04	2020-02-07 21:00:04	2020-07-17 12:52:32	NO001	2	2	1	1	E0C33592-52C6-4DD6-A5D5-E5031B41CF5F.JPEG	2020-02-07 20:58:00	2020-02-07 20:58:00	2020-02-07 20:58:00	2020	2	7	1	1	4A2FB460-7884-4761-90DB-82325065CB1A.JPEG	2020-02-07 20:58:00	2020-02-07 20:58:00	2020-02-07 20:58:00	2020	2	7
16	CP288	86	Prod	1175	82	1005	25	NO001	NO001	World	11510	Product change TP1	0	6993	APP_PRODUCTCHANGE_TP_1	Product change TP1	17		52775	Baseplate change TP 1	0		146027	4	2020-02-08 21:00:59	2020-02-08 21:00:59	2020-07-17 12:52:32	NO001	3	3	1	1	A3711141-55B9-4F9A-A536-3316E8965BEA.JPEG	2020-02-08 21:05:00	2020-02-08 21:05:00	2020-02-08 21:05:00	2020	2	8	1	1	7A90CB11-4D77-422A-A84C-ADA1F00AFA8A.JPEG	2020-02-08 21:05:00	2020-02-08 21:05:00	2020-02-08 21:05:00	2020	2	8
16	CP288	86	Prod	1175	82	1005	25	NO001	NO001	World	11510	Product change TP1	0	6993	APP_PRODUCTCHANGE_TP_1	Product change TP1	17		52775	Baseplate change TP 1	0		146044	5	2020-02-09 20:00:09	2020-02-09 20:00:09	2020-07-17 12:52:32	NO001	4	4	1	1	E81E542E-D8CB-4727-8F1B-F65966BA67E8.JPEG	2020-02-09 20:27:00	2020-02-09 20:27:00	2020-02-09 20:27:00	2020	2	9	1	1	01D36AF6-9849-415A-8399-0C8AB5D79EFD.JPEG	2020-02-09 20:28:00	2020-02-09 20:28:00	2020-02-09 20:28:00	2020	2	9
16	CP288	86	Prod	1175	82	1005	25	NO001	NO001	World	11510	Product change TP1	0	6993	APP_PRODUCTCHANGE_TP_1	Product change TP1	17		52775	Baseplate change TP 1	0		146092	6	2020-02-10 21:00:04	2020-02-10 21:00:04	2020-07-17 12:52:32	NO001	5	5	1	1	A3F36694-58F9-4D9F-B9AC-D255C3FE89CF.JPEG	2020-02-10 21:10:00	2020-02-10 21:10:00	2020-02-10 21:10:00	2020	2	10	1	1	11B53899-5F6E-4498-8EF4-B242D2539698.JPEG	2020-02-10 21:11:00	2020-02-10 21:11:00	2020-02-10 21:11:00	2020	2	10
16	CP288	86	Prod	1175	82	1005	25	NO001	NO001	World	11510	Product change TP1	0	6993	APP_PRODUCTCHANGE_TP_1	Product change TP1	17		52775	Baseplate change TP 1	0		146431	7	2020-02-12 20:00:14	2020-02-12 20:00:14	2020-07-17 12:52:32	NO001	6	6	1	1	9B10F6F0-8582-4E55-8B5F-92395BFD654A.JPEG	2020-02-11 19:35:00	2020-02-11 19:35:00	2020-02-11 19:35:00	2020	2	11	1	1	3AAEDE95-BF5B-4BF0-B0C5-4799AE240EDE.JPEG	2020-02-11 19:35:00	2020-02-11 19:35:00	2020-02-11 19:35:00	2020	2	11
16	CP288	86	Prod	1175	82	1005	25	NO001	NO001	World	11510	Product change TP1	0	6993	APP_PRODUCTCHANGE_TP_1	Product change TP1	17		52775	Baseplate change TP 1	0		146482	8	2020-02-14 16:00:05	2020-02-14 16:00:05	2020-07-17 12:52:32	NO001	7	7	1	1	A57E9518-379B-4AC3-921A-E261F3111041.JPEG	2020-02-12 20:40:00	2020-02-12 20:40:00	2020-02-12 20:40:00	2020	2	12	1	1	1102CC81-D11C-448E-A7AF-60855870B96D.JPEG	2020-02-12 20:41:00	2020-02-12 20:41:00	2020-02-12 20:41:00	2020	2	12
16	CP288	86	Prod	1175	82	1005	25	NO001	NO001	World	11510	Product change TP1	0	6993	APP_PRODUCTCHANGE_TP_1	Product change TP1	17		52775	Baseplate change TP 1	0		146485	9	2020-02-14 16:00:09	2020-02-14 16:00:09	2020-07-17 12:52:32	NO001	8	8	1	1	0F1077E3-4CEC-4F9C-B300-F9DEB2238AEF.JPEG	2020-02-14 12:07:00	2020-02-14 12:07:00	2020-02-14 12:07:00	2020	2	14	1	1	A94D43C1-91E5-4D81-ABAC-CE31BCBA5E5E.JPEG	2020-02-14 12:08:00	2020-02-14 12:08:00	2020-02-14 12:08:00	2020	2	14
16	CP288	86	Prod	1175	82	1005	25	NO001	NO001	World	11510	Product change TP1	0	6993	APP_PRODUCTCHANGE_TP_1	Product change TP1	17		52775	Baseplate change TP 1	0		146503	10	2020-02-14 19:00:07	2020-02-14 19:00:07	2020-07-17 12:52:32	NO001	9	9	1	1	F01F56FF-A747-4D54-BB0B-67DA89B9B7DC.JPEG	2020-02-14 19:54:00	2020-02-14 19:54:00	2020-02-14 19:54:00	2020	2	14	1	1	207F637F-F87C-4DAE-BEA2-33A3482D1841.JPEG	2020-02-14 19:55:00	2020-02-14 19:55:00	2020-02-14 19:55:00	2020	2	14
16	CP288	86	Prod	1175	82	1005	25	NO001	NO001	World	11510	Product change TP1	0	6993	APP_PRODUCTCHANGE_TP_1	Product change TP1	17		52775	Baseplate change TP 1	0		146542	11	2020-02-16 09:00:09	2020-02-16 09:00:09	2020-07-17 12:52:32	NO001	10	10	1	1	3C069454-A5CB-4DF0-B21F-ED55C440AD9F.JPEG	2020-02-15 06:54:00	2020-02-15 06:54:00	2020-02-15 06:54:00	2020	2	15	1	1	17FA09E6-1F50-44D7-BC20-3F24E8A5CEC6.JPEG	2020-02-15 06:55:00	2020-02-15 06:55:00	2020-02-15 06:55:00	2020	2	15
16	CP288	86	Prod	1175	82	1005	25	NO001	NO001	World	11510	Product change TP1	0	6993	APP_PRODUCTCHANGE_TP_1	Product change TP1	17		52775	Baseplate change TP 1	0		146545	12	2020-02-16 09:00:11	2020-02-16 09:00:11	2020-07-17 12:52:32	NO001	11	11	1	1	CB0BDEEE-5BFF-41EB-94B8-35E2E6584DB2.JPEG	2020-02-16 09:48:00	2020-02-16 09:48:00	2020-02-16 09:48:00	2020	2	16	1	1	FAD6C060-07B1-41E0-BDEC-703D3FDDC3A1.JPEG	2020-02-16 09:48:00	2020-02-16 09:48:00	2020-02-16 09:48:00	2020	2	16
16	CP288	86	Prod	1175	82	1005	25	NO001	NO001	World	11510	Product change TP1	0	6993	APP_PRODUCTCHANGE_TP_1	Product change TP1	17		52775	Baseplate change TP 1	0		146744	13	2020-02-17 20:00:07	2020-02-17 20:00:07	2020-07-17 12:52:32	NO001	12	12	1	1	FE3857E8-FE13-45BF-B3EE-03DF007DB10E.JPEG	2020-02-16 17:28:00	2020-02-16 17:28:00	2020-02-16 17:28:00	2020	2	16	1	1	6F37A143-1638-4D05-8143-A2675A302EFD.JPEG	2020-02-16 17:29:00	2020-02-16 17:29:00	2020-02-16 17:29:00	2020	2	16
16	CP288	86	Prod	1175	82	1005	25	NO001	NO001	World	11510	Product change TP1	0	6993	APP_PRODUCTCHANGE_TP_1	Product change TP1	17		52775	Baseplate change TP 1	0		146747	14	2020-02-17 20:00:10	2020-02-17 20:00:10	2020-07-17 12:52:32	NO001	13	13	1	1	F2097EAC-ADDC-4D15-8BFF-715FC0713446.JPEG	2020-02-17 20:38:00	2020-02-17 20:38:00	2020-02-17 20:38:00	2020	2	17	1	1	7FDFCDF3-1061-4B66-A36B-84EECDB2BAAA.JPEG	2020-02-17 20:39:00	2020-02-17 20:39:00	2020-02-17 20:39:00	2020	2	17
16	CP288	86	Prod	1175	82	1005	25	NO001	NO001	World	11510	Product change TP1	0	6993	APP_PRODUCTCHANGE_TP_1	Product change TP1	17		52775	Baseplate change TP 1	0		149447	15	2020-02-18 17:00:43	2020-02-18 17:00:43	2020-07-17 12:52:32	NO001	14	14	1	1	118B5D4C-3251-4614-B982-7FC589A7BFD7.JPEG	2020-02-18 17:29:00	2020-02-18 17:29:00	2020-02-18 17:29:00	2020	2	18	1	1	000325DB-5303-4A45-9701-46041B1E5D3C.JPEG	2020-02-18 17:30:00	2020-02-18 17:30:00	2020-02-18 17:30:00	2020	2	18
16	CP288	86	Prod	1175	82	1005	25	NO001	NO001	World	11510	Product change TP1	0	6993	APP_PRODUCTCHANGE_TP_1	Product change TP1	17		52775	Baseplate change TP 1	0		152546	16	2020-02-20 19:00:17	2020-02-20 19:00:17	2020-07-17 12:52:32	NO001	15	15	1	1	36F2EC4B-C93F-4B66-9CDB-94A264ADA7ED.JPEG	2020-02-19 05:43:00	2020-02-19 05:43:00	2020-02-19 05:43:00	2020	2	19	1	1	37F26F88-58FE-492B-872E-826CF9A00FD2.JPEG	2020-02-19 05:43:00	2020-02-19 05:43:00	2020-02-19 05:43:00	2020	2	19
16	CP288	86	Prod	1175	82	1005	25	NO001	NO001	World	11510	Product change TP1	0	6993	APP_PRODUCTCHANGE_TP_1	Product change TP1	17		52775	Baseplate change TP 1	0		152549	17	2020-02-20 19:00:25	2020-02-20 19:00:25	2020-07-17 12:52:32	NO001	16	16	1	1	19BB184F-2AD2-44E0-ABD6-F817366B510E.JPEG	2020-02-19 15:16:00	2020-02-19 15:16:00	2020-02-19 15:16:00	2020	2	19	1	1	15870E88-61A1-4A50-A0A2-CC843B34E645.JPEG	2020-02-19 15:16:00	2020-02-19 15:16:00	2020-02-19 15:16:00	2020	2	19
16	CP288	86	Prod	1175	82	1005	25	NO001	NO001	World	11510	Product change TP1	0	6993	APP_PRODUCTCHANGE_TP_1	Product change TP1	17		52775	Baseplate change TP 1	0		152552	18	2020-02-20 19:00:38	2020-02-20 19:00:38	2020-07-17 12:52:32	NO001	17	17	1	1	DF078144-0655-4F1C-92E5-1884E6EF7FE1.JPEG	2020-02-20 19:23:00	2020-02-20 19:23:00	2020-02-20 19:23:00	2020	2	20	1	1	75078137-4D8E-4BAB-944F-2F27E28EF914.JPEG	2020-02-20 19:23:00	2020-02-20 19:23:00	2020-02-20 19:23:00	2020	2	20
16	CP288	86	Prod	1175	82	1005	25	NO001	NO001	World	11510	Product change TP1	0	6993	APP_PRODUCTCHANGE_TP_1	Product change TP1	17		52775	Baseplate change TP 1	0		152579	19	2020-02-21 11:00:06	2020-02-21 11:00:06	2020-07-17 12:52:32	NO001	18	18	1	1	FC08FFA6-A2B1-4D49-BFF9-662A1AEAE1A4.JPEG	2020-02-21 11:09:00	2020-02-21 11:09:00	2020-02-21 11:09:00	2020	2	21	1	1	EA4D8BFF-7017-4C8D-B320-E30779C58BAA.JPEG	2020-02-21 11:10:00	2020-02-21 11:10:00	2020-02-21 11:10:00	2020	2	21
[truncated: 2,039 more rows]
[truncated: 91 more columns]
